# Supplementary material
Source: HighWire-hosted journal article supplement (doi:10.1101/rna.079813.123)
Supplement: Supplemental_TableS1.xlsx [file Supplemental_TableS1.xlsx]

## Sheet: 3'UTR
FBtr ID	Sequence	Annot data	PREa	PREc	PREg	PREt	FBgn	Total PRE	PREa	PREc	PREg	PREt	Gene name
FBtr0301652	agtttcctcgaagtcaatcaccgcaaagagaatccaccatagttatgtagatataaaaatatcaaccaaaaaaaaaaaggaatattatattcgtggcatggttatgtatgaaatgcatttcaggcttactggtcaaaactcaatgagcaatacgaattgttatgcagttttcagatttcgtgtatgtttcccgataggaaccgaaacaaagtgaatggagctactttggtggagtggttgatgtagatatcatcgttaccattataggcaagttttaatgaggaaagataacattaaaaatcaaggacaaacattatttgccgccttggaaagttatgtaataatgttcttgcggatgtgagcaattaagttggatgcatatctgcgcggagaattgat…	>FBtr0301652 type=three_prime_UTR; loc=X:complement(16074717..16079819);MD5=47e2bb0397f4f88845ca00a7eea2d857; length=5103; parent=FBgn0028397; release=r6.38; species=Dmel;	c(2086, 5013)	c(4423, 4506)	c(46, 242, 559)	c(490, 576, 1157, 1876, 3294)	FBgn0028397	12	2	2	3	5	Tob
FBtr0301768	tatgtcagtcaccataataacagataaataaatatgatgataaaacacgtgtaatactgataacatagcccataaacggaaattaatttaactcaacttaatattgaatttgttaatatgagatcagttcatttacatgggaaccataaatgaattaaaactactgcgaatctagagcgtaatataactttacccggcagcagcataacgccttttaaacactaaatctcaaaatcgacgacagctataattcgaaatgcataatcaaaatccgaacgaggcggtgaactttatgaattttaaagtagctaaatcgcgtaccaaatcatttaaatcccaactatagtgaaagcctttaataatattcaaatcactttgctacgataataatgtaatata…	>FBtr0301768 type=three_prime_UTR; loc=3R:4297562..4301541;MD5=f4372dc65ae36d47d1ae07a49be8052b; length=3980; parent=FBgn0041605; release=r6.38; species=Dmel;	-1	-1	-1	c(730, 1410, 3584, 3600, 3616, 3624, 3632, 3640, 3648, 3656, 3664)	FBgn0041605	11	0	0	0	11	cpx
FBtr0301771	tatgtcagtcaccataataacagataaataaatatgatgataaaacacgtgtaatactgataacatagcccataaacggaaattaatttaactcaacttaatattgaatttgttaatatgagatcagttcatttacatgggaaccataaatgaattaaaactactgcgaatctagagcgtaatataactttacccggcagcagcataacgccttttaaacactaaatctcaaaatcgacgacagctataattcgaaatgcataatcaaaatccgaacgaggcggtgaactttatgaattttaaagtagctaaatcgcgtaccaaatcatttaaatcccaactatagtgaaagcctttaataatattcaaatcactttgctacgataataatgtaatata…	>FBtr0301771 type=three_prime_UTR; loc=3R:4297562..4304604;MD5=420ce0d238d0b688969a8b229a338e52; length=7043; parent=FBgn0041605; release=r6.38; species=Dmel;	-1	-1	-1	c(730, 1410, 3584, 3600, 3616, 3624, 3632, 3640, 3648, 3656, 3664)	FBgn0041605	11	0	0	0	11	cpx
FBtr0336482	ctgtatcagattttgagttgtcgaaattttttgtttcttactactttgccagcggtttacgcgagtcccgccaggtccagacaatacctatacaaattgacttaaaaactgaaaccacaacaaaaaccgtttaatatccgctaaatatcccacggcgctcgaaagtagtaattgtggttttgtttgtgcatctgtgtgtctctcgtatcttaatgcaatcgaacaacccaataaaagtctataaataactgcccactaaccgaactatctatctctctatatatatgtatatttatgtactcttttccatgtgcgtaaaacatctaagctacaaacctaactctaatactaaccctaactgcaaccctatctgtctaagatctaatcttcaatcttgat…	>FBtr0336482 type=three_prime_UTR; loc=3R:4295820..4304604;MD5=bc8b42e8dd7bc6c38ae42d97af26789e; length=8785; parent=FBgn0041605; release=r6.38; species=Dmel;	-1	-1	-1	c(2472, 3152, 5326, 5342, 5358, 5366, 5374, 5382, 5390, 5398, 5406)	FBgn0041605	11	0	0	0	11	cpx
FBtr0100499	tatgtcagtcaccataataacagataaataaatatgatgataaaacacgtgtaatactgataacatagcccataaacggaaattaatttaactcaacttaatattgaatttgttaatatgagatcagttcatttacatgggaaccataaatgaattaaaactactgcgaatctagagcgtaatataactttacccggcagcagcataacgccttttaaacactaaatctcaaaatcgacgacagctataattcgaaatgcataatcaaaatccgaacgaggcggtgaactttatgaattttaaagtagctaaatcgcgtaccaaatcatttaaatcccaactatagtgaaagcctttaataatattcaaatcactttgctacgataataatgtaatata…	>FBtr0100499 type=three_prime_UTR; loc=3R:join(4297562..4298585,4299790..4301541);MD5=08a7cc234ebeb033072f4d98f37e9481; length=2776; parent=FBgn0041605; release=r6.38; species=Dmel;	-1	-1	-1	c(730, 2380, 2396, 2412, 2420, 2428, 2436, 2444, 2452, 2460)	FBgn0041605	10	0	0	0	10	cpx
FBtr0100500	tatgtcagtcaccataataacagataaataaatatgatgataaaacacgtgtaatactgataacatagcccataaacggaaattaatttaactcaacttaatattgaatttgttaatatgagatcagttcatttacatgggaaccataaatgaattaaaactactgcgaatctagagcgtaatataactttacccggcagcagcataacgccttttaaacactaaatctcaaaatcgacgacagctataattcgaaatgcataatcaaaatccgaacgaggcggtgaactttatgaattttaaagtagctaaatcgcgtaccaaatcatttaaatcccaactatagtgaaagcctttaataatattcaaatcactttgctacgataataatgtaatata…	>FBtr0100500 type=three_prime_UTR; loc=3R:join(4297562..4298585,4299790..4301541);MD5=08a7cc234ebeb033072f4d98f37e9481; length=2776; parent=FBgn0041605; release=r6.38; species=Dmel;	-1	-1	-1	c(730, 2380, 2396, 2412, 2420, 2428, 2436, 2444, 2452, 2460)	FBgn0041605	10	0	0	0	10	cpx
FBtr0078898	tatgtcagtcaccataataacagataaataaatatgatgataaaacacgtgtaatactgataacatagcccataaacggaaattaatttaactcaacttaatattgaatttgttaatatgagatcagttcatttacatgggaaccataaatgaattaaaactactgcgaatctagagcgtaatataactttacccggcagcagcataacgccttttaaacactaaatctcaaaatcgacgacagctataattcgaaatgcataatcaaaatccgaacgaggcggtgaactttatgaattttaaagtagctaaatcgcgtaccaaatcatttaaatcccaactatagtgaaagcctttaataatattcaaatcactttgctacgataataatgtaatata…	>FBtr0078898 type=three_prime_UTR; loc=3R:join(4297562..4298585,4299790..4301541);MD5=08a7cc234ebeb033072f4d98f37e9481; length=2776; parent=FBgn0041605; release=r6.38; species=Dmel;	-1	-1	-1	c(730, 2380, 2396, 2412, 2420, 2428, 2436, 2444, 2452, 2460)	FBgn0041605	10	0	0	0	10	cpx
FBtr0078900	tatgtcagtcaccataataacagataaataaatatgatgataaaacacgtgtaatactgataacatagcccataaacggaaattaatttaactcaacttaatattgaatttgttaatatgagatcagttcatttacatgggaaccataaatgaattaaaactactgcgaatctagagcgtaatataactttacccggcagcagcataacgccttttaaacactaaatctcaaaatcgacgacagctataattcgaaatgcataatcaaaatccgaacgaggcggtgaactttatgaattttaaagtagctaaatcgcgtaccaaatcatttaaatcccaactatagtgaaagcctttaataatattcaaatcactttgctacgataataatgtaatata…	>FBtr0078900 type=three_prime_UTR; loc=3R:join(4297562..4298585,4299790..4301541);MD5=08a7cc234ebeb033072f4d98f37e9481; length=2776; parent=FBgn0041605; release=r6.38; species=Dmel;	-1	-1	-1	c(730, 2380, 2396, 2412, 2420, 2428, 2436, 2444, 2452, 2460)	FBgn0041605	10	0	0	0	10	cpx
FBtr0078901	tatgtcagtcaccataataacagataaataaatatgatgataaaacacgtgtaatactgataacatagcccataaacggaaattaatttaactcaacttaatattgaatttgttaatatgagatcagttcatttacatgggaaccataaatgaattaaaactactgcgaatctagagcgtaatataactttacccggcagcagcataacgccttttaaacactaaatctcaaaatcgacgacagctataattcgaaatgcataatcaaaatccgaacgaggcggtgaactttatgaattttaaagtagctaaatcgcgtaccaaatcatttaaatcccaactatagtgaaagcctttaataatattcaaatcactttgctacgataataatgtaatata…	>FBtr0078901 type=three_prime_UTR; loc=3R:join(4297562..4298585,4299790..4301541);MD5=08a7cc234ebeb033072f4d98f37e9481; length=2776; parent=FBgn0041605; release=r6.38; species=Dmel;	-1	-1	-1	c(730, 2380, 2396, 2412, 2420, 2428, 2436, 2444, 2452, 2460)	FBgn0041605	10	0	0	0	10	cpx
FBtr0078897	tatgtcagtcaccataataacagataaataaatatgatgataaaacacgtgtaatactgataacatagcccataaacggaaattaatttaactcaacttaatattgaatttgttaatatgagatcagttcatttacatgggaaccataaatgaattaaaactactgcgaatctagagcgtaatataactttacccggcagcagcataacgccttttaaacactaaatctcaaaatcgacgacagctataattcgaaatgcataatcaaaatccgaacgaggcggtgaactttatgaattttaaagtagctaaatcgcgtaccaaatcatttaaatcccaactatagtgaaagcctttaataatattcaaatcactttgctacgataataatgtaatata…	>FBtr0078897 type=three_prime_UTR; loc=3R:join(4297562..4298585,4299790..4301541);MD5=08a7cc234ebeb033072f4d98f37e9481; length=2776; parent=FBgn0041605; release=r6.38; species=Dmel;	-1	-1	-1	c(730, 2380, 2396, 2412, 2420, 2428, 2436, 2444, 2452, 2460)	FBgn0041605	10	0	0	0	10	cpx
FBtr0078899	tatgtcagtcaccataataacagataaataaatatgatgataaaacacgtgtaatactgataacatagcccataaacggaaattaatttaactcaacttaatattgaatttgttaatatgagatcagttcatttacatgggaaccataaatgaattaaaactactgcgaatctagagcgtaatataactttacccggcagcagcataacgccttttaaacactaaatctcaaaatcgacgacagctataattcgaaatgcataatcaaaatccgaacgaggcggtgaactttatgaattttaaagtagctaaatcgcgtaccaaatcatttaaatcccaactatagtgaaagcctttaataatattcaaatcactttgctacgataataatgtaatata…	>FBtr0078899 type=three_prime_UTR; loc=3R:join(4297562..4298585,4299790..4301541);MD5=08a7cc234ebeb033072f4d98f37e9481; length=2776; parent=FBgn0041605; release=r6.38; species=Dmel;	-1	-1	-1	c(730, 2380, 2396, 2412, 2420, 2428, 2436, 2444, 2452, 2460)	FBgn0041605	10	0	0	0	10	cpx
FBtr0113337	tatgtcagtcaccataataacagataaataaatatgatgataaaacacgtgtaatactgataacatagcccataaacggaaattaatttaactcaacttaatattgaatttgttaatatgagatcagttcatttacatgggaaccataaatgaattaaaactactgcgaatctagagcgtaatataactttacccggcagcagcataacgccttttaaacactaaatctcaaaatcgacgacagctataattcgaaatgcataatcaaaatccgaacgaggcggtgaactttatgaattttaaagtagctaaatcgcgtaccaaatcatttaaatcccaactatagtgaaagcctttaataatattcaaatcactttgctacgataataatgtaatata…	>FBtr0113337 type=three_prime_UTR; loc=3R:join(4297562..4298585,4299790..4301541);MD5=08a7cc234ebeb033072f4d98f37e9481; length=2776; parent=FBgn0041605; release=r6.38; species=Dmel;	-1	-1	-1	c(730, 2380, 2396, 2412, 2420, 2428, 2436, 2444, 2452, 2460)	FBgn0041605	10	0	0	0	10	cpx
FBtr0113338	tatgtcagtcaccataataacagataaataaatatgatgataaaacacgtgtaatactgataacatagcccataaacggaaattaatttaactcaacttaatattgaatttgttaatatgagatcagttcatttacatgggaaccataaatgaattaaaactactgcgaatctagagcgtaatataactttacccggcagcagcataacgccttttaaacactaaatctcaaaatcgacgacagctataattcgaaatgcataatcaaaatccgaacgaggcggtgaactttatgaattttaaagtagctaaatcgcgtaccaaatcatttaaatcccaactatagtgaaagcctttaataatattcaaatcactttgctacgataataatgtaatata…	>FBtr0113338 type=three_prime_UTR; loc=3R:join(4297562..4298585,4299790..4301541);MD5=08a7cc234ebeb033072f4d98f37e9481; length=2776; parent=FBgn0041605; release=r6.38; species=Dmel;	-1	-1	-1	c(730, 2380, 2396, 2412, 2420, 2428, 2436, 2444, 2452, 2460)	FBgn0041605	10	0	0	0	10	cpx
FBtr0113340	tatgtcagtcaccataataacagataaataaatatgatgataaaacacgtgtaatactgataacatagcccataaacggaaattaatttaactcaacttaatattgaatttgttaatatgagatcagttcatttacatgggaaccataaatgaattaaaactactgcgaatctagagcgtaatataactttacccggcagcagcataacgccttttaaacactaaatctcaaaatcgacgacagctataattcgaaatgcataatcaaaatccgaacgaggcggtgaactttatgaattttaaagtagctaaatcgcgtaccaaatcatttaaatcccaactatagtgaaagcctttaataatattcaaatcactttgctacgataataatgtaatata…	>FBtr0113340 type=three_prime_UTR; loc=3R:join(4297562..4298585,4299790..4301541);MD5=08a7cc234ebeb033072f4d98f37e9481; length=2776; parent=FBgn0041605; release=r6.38; species=Dmel;	-1	-1	-1	c(730, 2380, 2396, 2412, 2420, 2428, 2436, 2444, 2452, 2460)	FBgn0041605	10	0	0	0	10	cpx
FBtr0113341	tatgtcagtcaccataataacagataaataaatatgatgataaaacacgtgtaatactgataacatagcccataaacggaaattaatttaactcaacttaatattgaatttgttaatatgagatcagttcatttacatgggaaccataaatgaattaaaactactgcgaatctagagcgtaatataactttacccggcagcagcataacgccttttaaacactaaatctcaaaatcgacgacagctataattcgaaatgcataatcaaaatccgaacgaggcggtgaactttatgaattttaaagtagctaaatcgcgtaccaaatcatttaaatcccaactatagtgaaagcctttaataatattcaaatcactttgctacgataataatgtaatata…	>FBtr0113341 type=three_prime_UTR; loc=3R:join(4297562..4298585,4299790..4301541);MD5=08a7cc234ebeb033072f4d98f37e9481; length=2776; parent=FBgn0041605; release=r6.38; species=Dmel;	-1	-1	-1	c(730, 2380, 2396, 2412, 2420, 2428, 2436, 2444, 2452, 2460)	FBgn0041605	10	0	0	0	10	cpx
FBtr0300789	tatgtcagtcaccataataacagataaataaatatgatgataaaacacgtgtaatactgataacatagcccataaacggaaattaatttaactcaacttaatattgaatttgttaatatgagatcagttcatttacatgggaaccataaatgaattaaaactactgcgaatctagagcgtaatataactttacccggcagcagcataacgccttttaaacactaaatctcaaaatcgacgacagctataattcgaaatgcataatcaaaatccgaacgaggcggtgaactttatgaattttaaagtagctaaatcgcgtaccaaatcatttaaatcccaactatagtgaaagcctttaataatattcaaatcactttgctacgataataatgtaatata…	>FBtr0300789 type=three_prime_UTR; loc=3R:join(4297562..4298585,4299790..4301541);MD5=08a7cc234ebeb033072f4d98f37e9481; length=2776; parent=FBgn0041605; release=r6.38; species=Dmel;	-1	-1	-1	c(730, 2380, 2396, 2412, 2420, 2428, 2436, 2444, 2452, 2460)	FBgn0041605	10	0	0	0	10	cpx
FBtr0301769	tatgtcagtcaccataataacagataaataaatatgatgataaaacacgtgtaatactgataacatagcccataaacggaaattaatttaactcaacttaatattgaatttgttaatatgagatcagttcatttacatgggaaccataaatgaattaaaactactgcgaatctagagcgtaatataactttacccggcagcagcataacgccttttaaacactaaatctcaaaatcgacgacagctataattcgaaatgcataatcaaaatccgaacgaggcggtgaactttatgaattttaaagtagctaaatcgcgtaccaaatcatttaaatcccaactatagtgaaagcctttaataatattcaaatcactttgctacgataataatgtaatata…	>FBtr0301769 type=three_prime_UTR; loc=3R:join(4297562..4298585,4299790..4301541);MD5=08a7cc234ebeb033072f4d98f37e9481; length=2776; parent=FBgn0041605; release=r6.38; species=Dmel;	-1	-1	-1	c(730, 2380, 2396, 2412, 2420, 2428, 2436, 2444, 2452, 2460)	FBgn0041605	10	0	0	0	10	cpx
FBtr0301770	tatgtcagtcaccataataacagataaataaatatgatgataaaacacgtgtaatactgataacatagcccataaacggaaattaatttaactcaacttaatattgaatttgttaatatgagatcagttcatttacatgggaaccataaatgaattaaaactactgcgaatctagagcgtaatataactttacccggcagcagcataacgccttttaaacactaaatctcaaaatcgacgacagctataattcgaaatgcataatcaaaatccgaacgaggcggtgaactttatgaattttaaagtagctaaatcgcgtaccaaatcatttaaatcccaactatagtgaaagcctttaataatattcaaatcactttgctacgataataatgtaatata…	>FBtr0301770 type=three_prime_UTR; loc=3R:join(4297562..4298585,4299790..4301541);MD5=08a7cc234ebeb033072f4d98f37e9481; length=2776; parent=FBgn0041605; release=r6.38; species=Dmel;	-1	-1	-1	c(730, 2380, 2396, 2412, 2420, 2428, 2436, 2444, 2452, 2460)	FBgn0041605	10	0	0	0	10	cpx
FBtr0301772	tatgtcagtcaccataataacagataaataaatatgatgataaaacacgtgtaatactgataacatagcccataaacggaaattaatttaactcaacttaatattgaatttgttaatatgagatcagttcatttacatgggaaccataaatgaattaaaactactgcgaatctagagcgtaatataactttacccggcagcagcataacgccttttaaacactaaatctcaaaatcgacgacagctataattcgaaatgcataatcaaaatccgaacgaggcggtgaactttatgaattttaaagtagctaaatcgcgtaccaaatcatttaaatcccaactatagtgaaagcctttaataatattcaaatcactttgctacgataataatgtaatata…	>FBtr0301772 type=three_prime_UTR; loc=3R:join(4297562..4298585,4299790..4301541);MD5=08a7cc234ebeb033072f4d98f37e9481; length=2776; parent=FBgn0041605; release=r6.38; species=Dmel;	-1	-1	-1	c(730, 2380, 2396, 2412, 2420, 2428, 2436, 2444, 2452, 2460)	FBgn0041605	10	0	0	0	10	cpx
FBtr0111009	cccacgacgatcgggaaggagcgaagaggagagggggacgcctccagccaggagcaataatacaaaaattgggggaagtaggggcccagccacgcccactcgcaagcctacgcctacgcttagttagtctatatacttaagatacagctgtaacctcaactcgacactgaaactagctcatctatctcaaacactttgaaagtccactgcaacgtatttatccgaagataacgaaaggcttttcgcaaaaaaatagtttgaaagaggttttgaaaatccgatttttaaaagttcaaacctcgtgtacagagagaaacatttaaatactcataatatggaacacaatcgatttaggattgcaattaattgaagataatgaattgatatttaatttgaagg…	>FBtr0111009 type=three_prime_UTR; loc=X:15005259..15009989;MD5=7d17881a92d08605819761a65d539da2; length=4731; parent=FBgn0000535; release=r6.38; species=Dmel;	c(1156, 1519, 2420)	c(1045, 3022, 4269)	-1	c(928, 958, 3310)	FBgn0000535	9	3	3	0	3	eag
FBtr0073955	cccacgacgatcgggaaggagcgaagaggagagggggacgcctccagccaggagcaataatacaaaaattgggggaagtaggggcccagccacgcccactcgcaagcctacgcctacgcttagttagtctatatacttaagatacagctgtaacctcaactcgacactgaaactagctcatctatctcaaacactttgaaagtccactgcaacgtatttatccgaagataacgaaaggcttttcgcaaaaaaatagtttgaaagaggttttgaaaatccgatttttaaaagttcaaacctcgtgtacagagagaaacatttaaatactcataatatggaacacaatcgatttaggattgcaattaattgaagataatgaattgatatttaatttgaagg…	>FBtr0073955 type=three_prime_UTR; loc=X:15005259..15009989;MD5=7d17881a92d08605819761a65d539da2; length=4731; parent=FBgn0000535; release=r6.38; species=Dmel;	c(1156, 1519, 2420)	c(1045, 3022, 4269)	-1	c(928, 958, 3310)	FBgn0000535	9	3	3	0	3	eag
FBtr0310016	cccacgacgatcgggaaggagcgaagaggagagggggacgcctccagccaggagcaataatacaaaaattgggggaagtaggggcccagccacgcccactcgcaagcctacgcctacgcttagttagtctatatacttaagatacagctgtaacctcaactcgacactgaaactagctcatctatctcaaacactttgaaagtccactgcaacgtatttatccgaagataacgaaaggcttttcgcaaaaaaatagtttgaaagaggttttgaaaatccgatttttaaaagttcaaacctcgtgtacagagagaaacatttaaatactcataatatggaacacaatcgatttaggattgcaattaattgaagataatgaattgatatttaatttgaagg…	>FBtr0310016 type=three_prime_UTR; loc=X:15005259..15009989;MD5=7d17881a92d08605819761a65d539da2; length=4731; parent=FBgn0000535; release=r6.38; species=Dmel;	c(1156, 1519, 2420)	c(1045, 3022, 4269)	-1	c(928, 958, 3310)	FBgn0000535	9	3	3	0	3	eag
FBtr0303286	cccacgacgatcgggaaggagcgaagaggagagggggacgcctccagccaggagcaataatacaaaaattgggggaagtaggggcccagccacgcccactcgcaagcctacgcctacgcttagttagtctatatacttaagatacagctgtaacctcaactcgacactgaaactagctcatctatctcaaacactttgaaagtccactgcaacgtatttatccgaagataacgaaaggcttttcgcaaaaaaatagtttgaaagaggttttgaaaatccgatttttaaaagttcaaacctcgtgtacagagagaaacatttaaatactcataatatggaacacaatcgatttaggattgcaattaattgaagataatgaattgatatttaatttgaagg…	>FBtr0303286 type=three_prime_UTR; loc=X:15005259..15009989;MD5=7d17881a92d08605819761a65d539da2; length=4731; parent=FBgn0000535; release=r6.38; species=Dmel;	c(1156, 1519, 2420)	c(1045, 3022, 4269)	-1	c(928, 958, 3310)	FBgn0000535	9	3	3	0	3	eag
FBtr0070742	ttcagattcaaatcagatcactctactcaaaactcaattcgatatctcagctctctcatacctgtacagcccttcaccatattgcacttcaatcgatcaatataccgaaaccaaaatacaaaatcaatcaaaatcgagaatcgaaaatcgccaaatcaaaaatcgaagccaaatcaaatcgaaataaatgcaaaatcagttttcaaattccgctcaccaacaatcgaaccaaatgcaaccaaaatcacaaaattgcccaaagcgaaacaccccacacaagttgagtaagatgtgcgctacagacagactaagaaaaacaataaacacgacaagaaaaaccaaacaactcgagtgctattaaacgacaaaacataacaaaacaacaagaaattaataaat…	>FBtr0070742 type=three_prime_UTR; loc=X:join(5176509..5176788,5186903..5187429,5203311..5203415,5217431..5217557,5221241..5221437,5223919..5224040,5224141..5224267,5224356..5224475,5224687..5224833,5225237..5225293,5228327..5228467,5228876..5229015,5229191..5229404,5233442..5233664,5233772..5233914,5234024..5234214,5234319..5234509,5234699..5237436,5237522..5237836,5237899..5238006,5238117..5238…	-1	c(11718, 12325, 12579)	-1	c(1505, 11756, 11881, 13420)	FBgn0029746	7	0	3	0	4	CG15465
FBtr0344669	ttcagattcaaatcagatcactctactcaaaactcaattcgatatctcagctctctcatacctgtacagcccttcaccatattgcacttcaatcgatcaatataccgaaaccaaaatacaaaatcaatcaaaatcgagaatcgaaaatcgccaaatcaaaaatcgaagccaaatcaaatcgaaataaatgcaaaatcagttttcaaattccgctcaccaacaatcgaaccaaatgcaaccaaaatcacaaaattgcccaaagcgaaacaccccacacaagttgagtaagatgtgcgctacagacagactaagaaaaacaataaacacgacaagaaaaaccaaacaactcgagtgctattaaacgacaaaacataacaaaacaacaagaaattaataaat…	>FBtr0344669 type=three_prime_UTR; loc=X:join(5176509..5176788,5186903..5187429,5203311..5203415,5217431..5217557,5221241..5221437,5223919..5224040,5224141..5224267,5224356..5224475,5224687..5224833,5225237..5225828,5225914..5225999,5228327..5228467,5228876..5229015,5229191..5229404,5233442..5233664,5233772..5233914,5234024..5234214,5234319..5234509,5234699..5237436,5237522..5237836,5237899..5238…	-1	c(12339, 12946, 13200)	-1	c(1505, 12377, 12502, 14041)	FBgn0029746	7	0	3	0	4	CG15465
FBtr0331349	acaccgacgaggaattccgtgggggaatgaacgatatggacagggaaaccatgaggcgtatatagcaaacaaacaaaaatcgattgacaatcgcattaagcaagcggcaagcattgtttaccactgttagaatttatgcttagacgaatttgggtctaaaaatcaatgtcacgtgtacgtagtagttaaaggcatttcttcactaggtctatctaaatctatagctcaagcccctttcttcttcaatcacttctctatctatcccttaagtagaaaacactgcgactcgctgtaggttataagtcaagccaaggattggtacaagttcaaattgaattgttattgactattgtaggcaagtgcaatatttatgttgaagtaacacgaaatacgaatatg…	>FBtr0331349 type=three_prime_UTR; loc=3R:complement(9461084..9466489);MD5=839737e365effe7db99cb58400fc7540; length=5406; parent=FBgn0037698; release=r6.38; species=Dmel;	c(1032, 1682)	c(404, 3855, 5142, 5150)	-1	2719	FBgn0037698	7	2	4	0	1	CG16779
FBtr0331350	tatcagctccacaagtccacacgcacagctcgctggcaaaatgctcgggtcttcaataaggtgaagagtcgcagtgcgcacatgaagacgcaccgcgtccaggagccggatcagaaacaccaactgcaaaaccaggctggagctggactgaccaccgtcgccacatcaacaataaccgcaccatcgtagacaccgacgaggaattccgtgggggaatgaacgatatggacagggaaaccatgaggcgtatatagcaaacaaacaaaaatcgattgacaatcgcattaagcaagcggcaagcattgtttaccactgttagaatttatgcttagacgaatttgggtctaaaaatcaatgtcacgtgtacgtagtagttaaaggcatttcttcactaggtct…	>FBtr0331350 type=three_prime_UTR; loc=3R:complement(join(9461084..9466631,9467354..9467400));MD5=137e75cb880a04a3202dc53110b81a72; length=5595; parent=FBgn0037698; release=r6.38; species=Dmel;	c(1221, 1871)	c(593, 4044, 5331, 5339)	-1	2908	FBgn0037698	7	2	4	0	1	CG16779
FBtr0331351	ggtgaagagtcgcagtgcgcacatgaagacgcaccgcgtccaggagccggatcagaaacaccaactgcaaaaccaggctggagctggactgaccaccgtcgccacatcaacaataaccgcaccatcgtagacaccgacgaggaattccgtgggggaatgaacgatatggacagggaaaccatgaggcgtatatagcaaacaaacaaaaatcgattgacaatcgcattaagcaagcggcaagcattgtttaccactgttagaatttatgcttagacgaatttgggtctaaaaatcaatgtcacgtgtacgtagtagttaaaggcatttcttcactaggtctatctaaatctatagctcaagcccctttcttcttcaatcacttctctatctatcccttaa…	>FBtr0331351 type=three_prime_UTR; loc=3R:complement(9461084..9466619);MD5=00ddab699609e141d7aa19c55865add4; length=5536; parent=FBgn0037698; release=r6.38; species=Dmel;	c(1162, 1812)	c(534, 3985, 5272, 5280)	-1	2849	FBgn0037698	7	2	4	0	1	CG16779
FBtr0479924	acaccgacgaggaattccgtgggggaatgaacgatatggacagggaaaccatgaggcgtatatagcaaacaaacaaaaatcgattgacaatcgcattaagcaagcggcaagcattgtttaccactgttagaatttatgcttagacgaatttgggtctaaaaatcaatgtcacgtgtacgtagtagttaaaggcatttcttcactaggtctatctaaatctatagctcaagcccctttcttcttcaatcacttctctatctatcccttaagtagaaaacactgcgactcgctgtaggttataagtcaagccaaggattggtacaagttcaaattgaattgttattgactattgtaggcaagtgcaatatttatgttgaagtaacacgaaatacgaatatg…	>FBtr0479924 type=three_prime_UTR; loc=3R:complement(9461084..9466489);MD5=839737e365effe7db99cb58400fc7540; length=5406; parent=FBgn0037698; release=r6.38; species=Dmel;	c(1032, 1682)	c(404, 3855, 5142, 5150)	-1	2719	FBgn0037698	7	2	4	0	1	CG16779
FBtr0089661	ctactggtgcaaaagacgttgcgtggtataaatttggccttgacaggagttacgttggatgccagaaacgactacaaaagctgtttatatttaatttaagtagaacaaataacaaaaacaaatttaatctattgctaaattaaattaaaatctaaattaaaatctaaattaatttaattaaattatacatttaatgataaacaacactaaaacaaaaacaaaaaattcaaatccagaaataacaaaaggcaagaaatgaacggtaagagagtacgaataaatccgtatagtaaggcataaaccaaaagtccaagaactaataaacattgacaaataacactacataacagaagggacattaaagcgacagcataaacatcgaagaagtgatggcagaat…	>FBtr0089661 type=three_prime_UTR; loc=X:complement(join(17932101..17939954,17940720..17940726));MD5=83568f505fe0842364a69e547d84f6c8; length=7861; parent=FBgn0003380; release=r6.38; species=Dmel;	c(467, 2274, 2337, 3713, 4005)	c(1771, 3366)	-1	-1	FBgn0003380	7	5	2	0	0	Sh
FBtr0310446	agtttcctcgaagtcaatcaccgcaaagagaatccaccatagttatgtagatataaaaatatcaaccaaaaaaaaaaaggaatattatattcgtggcatggttatgtatgaaatgcatttcaggcttactggtcaaaactcaatgagcaatacgaattgttatgcagttttcagatttcgtgtatgtttcccgataggaaccgaaacaaagtgaatggagctactttggtggagtggttgatgtagatatcatcgttaccattataggcaagttttaatgaggaaagataacattaaaaatcaaggacaaacattatttgccgccttggaaagttatgtaataatgttcttgcggatgtgagcaattaagttggatgcatatctgcgcggagaattgat…	>FBtr0310446 type=three_prime_UTR; loc=X:complement(16077887..16079819);MD5=9983d076972c859f638b7fb731af183c; length=1933; parent=FBgn0028397; release=r6.38; species=Dmel;	-1	-1	c(46, 242, 559)	c(490, 576, 1157, 1876)	FBgn0028397	7	0	0	3	4	Tob
FBtr0340268	gcagctaatcaattcccaacgatagccaaccagccaaaaaaaaaacaccccatagaatcttctgctttaactgctagtctgcaaggtcttgtttcgagtcatgatactatggtttataatggatcatagatattaacttcaggtcaagacctttttgggctagataagttcccctttgaacaatcaacaatagttaacacaccgcccaaaaaaccacccgcgacccacaagtaatttccatttgccccattccgccagaggatcgggcattatctgtgtatatatggtatgtgtgtgctacaatacacgattatttgtatcgtcagtaattatttaacgatagcgataacgattttcattgtgtgtctaattttaaacgaccctttaccccctttactc…	>FBtr0340268 type=three_prime_UTR; loc=X:complement(6720004..6721551);MD5=c4326849978c14cfdce175a9511ea825; length=1548; parent=FBgn0029896; release=r6.38; species=Dmel;	-1	c(1371, 1391, 1399, 1411)	-1	c(277, 1114)	FBgn0029896	6	0	4	0	2	CG3168
FBtr0333473	ttgcaaatcaaagcgcgcaacaatcgtccatcagtcgatatgaacaaatataactacaaatactcgtcgggcaagatatacggatgtcgacggcagcagcaatcaacaaacaccagcaatagcaacaccatctgcaacagcaacagcaacagcaacagcaacagcaacagtaatagcaatagcaatagcaacctcaacataaatatcttggcaaggagtcaacacaccgtacactgcaataacaacagtcaactggacaagataagcaggataagtagcatgagcaacatttgcctcatcgacagcaacagcaacagcaacatcaatcaacaaccattgactacaacagcgtcaatcatctaatagaaccgagaagcaagaattagaacaaactaagac…	>FBtr0333473 type=three_prime_UTR; loc=X:9170816..9189309;MD5=6d9b99573ff2c73a4727ee88e3551142; length=18494; parent=FBgn0026206; release=r6.38; species=Dmel;	18074	11051	-1	c(476, 2270, 4430, 12365)	FBgn0026206	6	1	1	0	4	mei-P26
FBtr0333474	ttgcaaatcaaagcgcgcaacaatcgtccatcagtcgatatgaacaaatataactacaaatactcgtcgggcaagatatacggatgtcgacggcagcagcaatcaacaaacaccagcaatagcaacaccatctgcaacagcaacagcaacagcaacagcaacagcaacagtaatagcaatagcaatagcaacctcaacataaatatcttggcaaggagtcaacacaccgtacactgcaataacaacagtcaactggacaagataagcaggataagtagcatgagcaacatttgcctcatcgacagcaacagcaacagcaacatcaatcaacaaccattgactacaacagcgtcaatcatctaatagaaccgagaagcaagaattagaacaaactaagac…	>FBtr0333474 type=three_prime_UTR; loc=X:9170816..9189309;MD5=6d9b99573ff2c73a4727ee88e3551142; length=18494; parent=FBgn0026206; release=r6.38; species=Dmel;	18074	11051	-1	c(476, 2270, 4430, 12365)	FBgn0026206	6	1	1	0	4	mei-P26
FBtr0310032	tctggcttgttatgcagttggcagctcaatccaaagcctaaatgcaatgcttaacttaagttcaactagctactcgatgtgtaatttcttgactttatatctatgaatcgaccatttatagggtattttgcgggtcgacgcgatccgccgactgacgaaactaaatcgaaactcaattttggttacatggcctgtttttcttgtcttgaaggagggttctgttccgttcagctgtagctggaaaaaagtgattacatcagcggcgaaaatagctgagcgacggcgtgttaacaatcggcaaacacggcaagcgcggccagcgatttgctgactaactgctaagtacgtccaaaatgtgttttgcactgcgcaaaaatgtggctggtttttggacaatat…	>FBtr0310032 type=three_prime_UTR; loc=2R:complement(join(9541947..9543992,9544049..9545355));MD5=a06ddbbd3d1f526c9d3f754daef6532d; length=3353; parent=FBgn0033421; release=r6.38; species=Dmel;	-1	c(1267, 1521, 1922, 1996)	-1	c(2539, 2557)	FBgn0033421	6	0	4	0	2	CG1888
FBtr0089658	ctactagtcaaacaaatggaaaatggacgaaatttgcgcagtgaaatgctacgttggatgccagaaacgtcatcaaaagcagtctaatttagaattttattaataaatacaattaaaatataattataataattagtaagcaacgtagttgtaaattaaacagcaaatgtacacagacacaacacacacacagacacagtgccagttcactcagcttgaattagagtatttgtagacaccaaaaagagtcaaatatggactggccttctatagggatttccttgtttctcctttcattttccttctggtaatctacacaccgaaaacacttacacacacacgtccacacacactcaaagtaaaaactctacttgatacctatgttcaaatttagcaatt…	>FBtr0089658 type=three_prime_UTR; loc=X:complement(join(17924307..17929703,17930117..17930123));MD5=141f57f3eaad741cc8d2fcf6f64f0f38; length=5404; parent=FBgn0003380; release=r6.38; species=Dmel;	c(1210, 2698)	-1	-1	c(3074, 4743, 4757, 4778)	FBgn0003380	6	2	0	0	4	Sh
FBtr0309803	ctgatcgccatggatttgtagaattgattaatcaaattttaatgttaatgtgtgagaaaataattaaaataaaaacataagtgcaataattattattctcgccagcccaaagccatcttatgaaacaaaaggccatcaaaactagtgccacgactcacatcgcaatatttcgtttaataaagaaaacatagaattggtgcacaaaaatcttttgaaacgactccgaggccaacccgaaagaataaagaaacatgagtcaaatctcaggctaggccgtgccaaatagaataaacagacaatacacactaaaacttagttacataaacatctattgcatttgacaccttataaaataatattttcaaatagttttcaaaatagttttctatttatttagct…	>FBtr0309803 type=three_prime_UTR; loc=4:108493..114270;MD5=16c2ec5d47dd3c391690b3d6788eba7b; length=5778; parent=FBgn0085432; release=r6.38; species=Dmel;	c(1366, 2422, 4977)	c(2349, 4455)	-1	4429	FBgn0085432	6	3	2	0	1	pan
FBtr0333065	gctccacccacccaccaaccacacacacacatacacacacacacaccgtctaatacacagcacacacagagaaaatacacctagcgaactcacattgacaaacaattagttttaacatgtcgccccaagcaaacaagaaccctgttaagttaaacattatcctggaaccagacacacagacaagccacaaaccacccgcctatcctttgatgtccttcatgagaaagattttcccgagcaaataccgtaaaaaaatccccagccacacaaaaattcagctcgcaatgggctaaatggacaattgccaagtatgaaaagcgaaagctatgattaaaaacaaagtgaggcagaaaatgtgcttgacgaaaggtatgattattattacactattattattaa…	>FBtr0333065 type=three_prime_UTR; loc=2R:complement(12085194..12092608);MD5=58ec10b1d6bec85481d2abc2855aafac; length=7415; parent=FBgn0086677; release=r6.38; species=Dmel;	c(1149, 2768, 2980, 3542, 6574, 6636)	-1	-1	-1	FBgn0086677	6	6	0	0	0	jeb
FBtr0331605	tgttgtctcatactatcggcttaaagcggcggcgtagggctaggataacccccaatgtatatgcaagatttgtatatcctcctacttttttttttttgcaatttactttgatttagcttcgatcctttcttgacattaagccctaaatatgatttttttctggagaacttcaatatcagttagtaggttatgtttaacgatttgcttgcgctttttccgcttttttttttgtttttttaccataccataccataccatacaaggggttagagtttacgagtgatttaacaaatttgatttcttcaatgtgatatatatatgattttctttccgcgcgatttgatttggtagggaaaggttaacgaaagcggttttatgaaatcaatttgaagtgttttt…	>FBtr0331605 type=three_prime_UTR; loc=X:3385313..3391697;MD5=2107bc68fbfd6f88230a5ada43763459; length=6385; parent=FBgn0262656; release=r6.38; species=Dmel;	c(2467, 5556, 5797)	-1	-1	c(461, 1363, 2680)	FBgn0262656	6	3	0	0	3	Myc
FBtr0333162	gccagtaccacaccgaattgtacatagccctaatcagttttcatttgatgaaattgactggcatttattaacacaaaattgaaaattttgctatttcaaagtggaaagtaaaaattgttgcaacaggaatataatgataagtacaagtttaaaaaaaaataacatacaaaaaagtcgaaattgtacaaagtaagccataccgtatgcttgttaccgccaaaccccaccaaatcaaatcgaaaatgtcgtgccattctttaccttaaatttaagttatattcttaggttcggaatcttaaattgtacatattcagcttacacagctgccaattgtaaagtaatcggcgctctaaacatgcattgttgcagaaaaataaaagacacgaagtttaattagga…	>FBtr0333162 type=three_prime_UTR; loc=2R:25228834..25231394;MD5=6c601fc11b444d0fd1968513ec5e9409; length=2561; parent=FBgn0001325; release=r6.38; species=Dmel;	1520	c(19, 302)	-1	c(1198, 1911, 1921)	FBgn0001325	6	1	2	0	3	Kr
FBtr0344647	gtttggacacttgaacattgcagtaatccacgactcgccagttaacaacggccaaggaagcggaagtgaaaagtgaaacagaaacggaaataaaatataaaaaacgatcgcaaagcaactacaaagtacttacaaaaacaaaaaaaaaacggcgcaaggaacggcgaatcggtttttttctatacagacctttacaactctaggctagtaagcaaaactatgtttttttttgtctagtattaattgtgcattagtgtgtgtttggccaatgaaagccagtcaaaaaaaaaaaattgacaaaaaaaaatagagaacggaacagaacagaagatgcgaacattttttttttactagagttaacgaaatgtatgttaagttatggcaaaatggaggagggca…	>FBtr0344647 type=three_prime_UTR; loc=X:5250820..5254864;MD5=5744591524e098c7b845fc2be96b7683; length=4045; parent=FBgn0266098; release=r6.38; species=Dmel;	-1	c(1488, 2095, 2349)	-1	c(1526, 1651, 3190)	FBgn0266098	6	0	3	0	3	rg
FBtr0344648	gtttggacacttgaacattgcagtaatccacgactcgccagttaacaacggccaaggaagcggaagtgaaaagtgaaacagaaacggaaataaaatataaaaaacgatcgcaaagcaactacaaagtacttacaaaaacaaaaaaaaaacggcgcaaggaacggcgaatcggtttttttctatacagacctttacaactctaggctagtaagcaaaactatgtttttttttgtctagtattaattgtgcattagtgtgtgtttggccaatgaaagccagtcaaaaaaaaaaaattgacaaaaaaaaatagagaacggaacagaacagaagatgcgaacattttttttttactagagttaacgaaatgtatgttaagttatggcaaaatggaggagggca…	>FBtr0344648 type=three_prime_UTR; loc=X:5250820..5254864;MD5=5744591524e098c7b845fc2be96b7683; length=4045; parent=FBgn0266098; release=r6.38; species=Dmel;	-1	c(1488, 2095, 2349)	-1	c(1526, 1651, 3190)	FBgn0266098	6	0	3	0	3	rg
FBtr0344649	gtttggacacttgaacattgcagtaatccacgactcgccagttaacaacggccaaggaagcggaagtgaaaagtgaaacagaaacggaaataaaatataaaaaacgatcgcaaagcaactacaaagtacttacaaaaacaaaaaaaaaacggcgcaaggaacggcgaatcggtttttttctatacagacctttacaactctaggctagtaagcaaaactatgtttttttttgtctagtattaattgtgcattagtgtgtgtttggccaatgaaagccagtcaaaaaaaaaaaattgacaaaaaaaaatagagaacggaacagaacagaagatgcgaacattttttttttactagagttaacgaaatgtatgttaagttatggcaaaatggaggagggca…	>FBtr0344649 type=three_prime_UTR; loc=X:5250820..5254864;MD5=5744591524e098c7b845fc2be96b7683; length=4045; parent=FBgn0266098; release=r6.38; species=Dmel;	-1	c(1488, 2095, 2349)	-1	c(1526, 1651, 3190)	FBgn0266098	6	0	3	0	3	rg
FBtr0344651	gtttggacacttgaacattgcagtaatccacgactcgccagttaacaacggccaaggaagcggaagtgaaaagtgaaacagaaacggaaataaaatataaaaaacgatcgcaaagcaactacaaagtacttacaaaaacaaaaaaaaaacggcgcaaggaacggcgaatcggtttttttctatacagacctttacaactctaggctagtaagcaaaactatgtttttttttgtctagtattaattgtgcattagtgtgtgtttggccaatgaaagccagtcaaaaaaaaaaaattgacaaaaaaaaatagagaacggaacagaacagaagatgcgaacattttttttttactagagttaacgaaatgtatgttaagttatggcaaaatggaggagggca…	>FBtr0344651 type=three_prime_UTR; loc=X:5250820..5254864;MD5=5744591524e098c7b845fc2be96b7683; length=4045; parent=FBgn0266098; release=r6.38; species=Dmel;	-1	c(1488, 2095, 2349)	-1	c(1526, 1651, 3190)	FBgn0266098	6	0	3	0	3	rg
FBtr0344652	gtttggacacttgaacattgcagtaatccacgactcgccagttaacaacggccaaggaagcggaagtgaaaagtgaaacagaaacggaaataaaatataaaaaacgatcgcaaagcaactacaaagtacttacaaaaacaaaaaaaaaacggcgcaaggaacggcgaatcggtttttttctatacagacctttacaactctaggctagtaagcaaaactatgtttttttttgtctagtattaattgtgcattagtgtgtgtttggccaatgaaagccagtcaaaaaaaaaaaattgacaaaaaaaaatagagaacggaacagaacagaagatgcgaacattttttttttactagagttaacgaaatgtatgttaagttatggcaaaatggaggagggca…	>FBtr0344652 type=three_prime_UTR; loc=X:5250820..5254864;MD5=5744591524e098c7b845fc2be96b7683; length=4045; parent=FBgn0266098; release=r6.38; species=Dmel;	-1	c(1488, 2095, 2349)	-1	c(1526, 1651, 3190)	FBgn0266098	6	0	3	0	3	rg
FBtr0344668	gtttggacacttgaacattgcagtaatccacgactcgccagttaacaacggccaaggaagcggaagtgaaaagtgaaacagaaacggaaataaaatataaaaaacgatcgcaaagcaactacaaagtacttacaaaaacaaaaaaaaaacggcgcaaggaacggcgaatcggtttttttctatacagacctttacaactctaggctagtaagcaaaactatgtttttttttgtctagtattaattgtgcattagtgtgtgtttggccaatgaaagccagtcaaaaaaaaaaaattgacaaaaaaaaatagagaacggaacagaacagaagatgcgaacattttttttttactagagttaacgaaatgtatgttaagttatggcaaaatggaggagggca…	>FBtr0344668 type=three_prime_UTR; loc=X:5250820..5254864;MD5=5744591524e098c7b845fc2be96b7683; length=4045; parent=FBgn0266098; release=r6.38; species=Dmel;	-1	c(1488, 2095, 2349)	-1	c(1526, 1651, 3190)	FBgn0266098	6	0	3	0	3	rg
FBtr0344078	ggaacggaacgacgccgaatgtcatcattaagtaaaggtgcagggccggcataattgcaactcaacctgcattaagcccaattaggttgccggcggcacgcactacatctcgccctaatcagtgttcgtgttgcttcttaactacccgttgcccctatagatactctttctacccgacaaaaatgaaaaaaaaaaaacaaaaaaaaagtcatcgaagttgcacctttatatgttttatagcttctcttatttaaagcacaaaattgtcgaaattattagaaaattattaaagaacttgaaatcgaagtcgatggttttggtttatgttccaaacttaaaggcccgcattcgtggaagggtacaatgttaattcgccttcatttcaacactgttaacttc…	>FBtr0344078 type=three_prime_UTR; loc=X:complement(3387944..3392663);MD5=3871b753994bbee0690295e686a7933a; length=4720; parent=FBgn0029657; release=r6.38; species=Dmel;	-1	-1	-1	c(3600, 4256, 4408, 4661, 4681)	FBgn0029657	5	0	0	0	5	CG12535
FBtr0301093	gagggagggggcgtggcacgggtcaacaggtcagcaggctggattccacttccatccgtggagtggaatggcgcacaagcaggtgagacgcatgacgggtgcagttttgttatgggtcgtaaattagagtacattttgggtgcggttcggccttgggaggcgaaattgacaattacagtagtccttcgagagggtgagcttagtcgcgaaatttaaaacaaacaaatattctttagactccaaatttcaaattctatattcatttttctaaaggtcaaacaaaattggtcgtaaaaacgttttaaaaagtactttctagaaacgatttctttccggcatttgtttgttttaagcatcgtatttgtatttgtctgaaacaaattgtttctccgtggtttg…	>FBtr0301093 type=three_prime_UTR; loc=3R:complement(9528238..9530821);MD5=8723ce9bfba0a52deecc9717dd9ab6e7; length=2584; parent=FBgn0000244; release=r6.38; species=Dmel;	1629	758	1792	c(1109, 2335)	FBgn0000244	5	1	1	1	2	by
FBtr0289998	tagtatgtagtatgtagtggttatttatccgtagttctagtcaagtagtcatcaatttatcaatccctgtatctatgcatccgtgctttgaggctgcgattgcgattgtgattgcaactcccaaattggttgtgctcaagaacttttgaattgcaactcgagtgcgccctcgatattaatttgtatttgtattcgtagttttagttgattgttttgccttatgtagaaatgcacttgcctgtatatatttagtacacattactcacctgatttgtagccattatgaagattagtttaacatcttgtttctcggtaaaactgtgccaagcgaataaattgccaaaatcgttttggaatgcacacgaacacgaatttgtttttaaactggcaactgcctgt…	>FBtr0289998 type=three_prime_UTR; loc=3R:complement(27375088..27382272);MD5=8ec278bf8101019a3ce739ecaebde32e; length=7185; parent=FBgn0016061; release=r6.38; species=Dmel;	c(1023, 6040)	-1	-1	c(240, 3414, 6091)	FBgn0016061	5	2	0	0	3	side
FBtr0074255	agtttcctcgaagtcaatcaccgcaaagagaatccaccatagttatgtagatataaaaatatcaaccaaaaaaaaaaaggaatattatattcgtggcatggttatgtatgaaatgcatttcaggcttactggtcaaaactcaatgagcaatacgaattgttatgcagttttcagatttcgtgtatgtttcccgataggaaccgaaacaaagtgaatggagctactttggtggagtggttgatgtagatatcatcgttaccattataggcaagttttaatgaggaaagataacattaaaaatcaaggacaaacattatttgccgccttggaaagttatgtaataatgttcttgcggatgtgagcaattaagttggatgcatatctgcgcggagaattgat…	>FBtr0074255 type=three_prime_UTR; loc=X:complement(16079014..16079819);MD5=5b49ae7a55ecca0aecbedd6ab63fdbd2; length=806; parent=FBgn0028397; release=r6.38; species=Dmel;	-1	-1	c(46, 242, 559)	c(490, 576)	FBgn0028397	5	0	0	3	2	Tob
FBtr0310317	agtttcctcgaagtcaatcaccgcaaagagaatccaccatagttatgtagatataaaaatatcaaccaaaaaaaaaaaggaatattatattcgtggcatggttatgtatgaaatgcatttcaggcttactggtcaaaactcaatgagcaatacgaattgttatgcagttttcagatttcgtgtatgtttcccgataggaaccgaaacaaagtgaatggagctactttggtggagtggttgatgtagatatcatcgttaccattataggcaagttttaatgaggaaagataacattaaaaatcaaggacaaacattatttgccgccttggaaagttatgtaataatgttcttgcggatgtgagcaattaagttggatgcatatctgcgcggagaattgat…	>FBtr0310317 type=three_prime_UTR; loc=X:complement(16079014..16079819);MD5=5b49ae7a55ecca0aecbedd6ab63fdbd2; length=806; parent=FBgn0028397; release=r6.38; species=Dmel;	-1	-1	c(46, 242, 559)	c(490, 576)	FBgn0028397	5	0	0	3	2	Tob
FBtr0337093	acactctcatccataagagaatcggaatcggtggacgaacttaaatcttcggactcggattccaaatcgcctcgtatggcaactttgtcaactatatcatcacgttagttagtcagtcagttagtcacctagttagttagttagggtaacagacaaaggtaagaccgcgaattagcgaataggaaagcttttgggtcgataaatgtaaataaaattgatggagtgaaacgttaaaggttatgattgctcaaggaaagatattaaacatataaatgtttttaattaataattaagtatattctttaaattatttcgtatgaaaacgtttttatgaacaaagttcaaataaaacataacaaagaaatgaaaggacgctacttagttttatgtaatgggttt…	>FBtr0337093 type=three_prime_UTR; loc=3R:complement(12840560..12842217);MD5=e3b339657650d4429452d5395f16e107; length=1658; parent=FBgn0038087; release=r6.38; species=Dmel;	c(204, 1046)	-1	-1	c(776, 1128, 1577)	FBgn0038087	5	2	0	0	3	beat-Va
FBtr0074005	atgggttctcctcacagccacgcctagacacaaacacacaagtacgccgacccttcctccacccaccaccaccccttcagacacacacacaaacacacactcgcacccgatcgaagaagatgtaacaacaaaccacacccaccacaaggccggtttataaatagattccatgccaatcccgccattgtttggtccacagtttatgcaattgatagtgcatatgtccagctttcggccaacgcaatgggggattgttagccaaaatgagcgggacggaatgctgcactacatcgtagtcgtggaaccgcttgtacgcgtccgttttgtctgctttgaatgggattaatgggatcaagtgcatactacgccgaagtctaacttgcgaaatgtgcacaccca…	>FBtr0074005 type=three_prime_UTR; loc=X:15325919..15326956;MD5=94033b5695b88ea6a4b779ed286b9c29; length=1038; parent=FBgn0004924; release=r6.38; species=Dmel;	915	850	-1	c(603, 621, 705)	FBgn0004924	5	1	1	0	3	Top1
FBtr0100294	atgggttctcctcacagccacgcctagacacaaacacacaagtacgccgacccttcctccacccaccaccaccccttcagacacacacacaaacacacactcgcacccgatcgaagaagatgtaacaacaaaccacacccaccacaaggccggtttataaatagattccatgccaatcccgccattgtttggtccacagtttatgcaattgatagtgcatatgtccagctttcggccaacgcaatgggggattgttagccaaaatgagcgggacggaatgctgcactacatcgtagtcgtggaaccgcttgtacgcgtccgttttgtctgctttgaatgggattaatgggatcaagtgcatactacgccgaagtctaacttgcgaaatgtgcacaccca…	>FBtr0100294 type=three_prime_UTR; loc=X:15325919..15328029;MD5=429dedceb589729b28ed56290c33412a; length=2111; parent=FBgn0004924; release=r6.38; species=Dmel;	915	850	-1	c(603, 621, 705)	FBgn0004924	5	1	1	0	3	Top1
FBtr0340434	atgggttctcctcacagccacgcctagacacaaacacacaagtacgccgacccttcctccacccaccaccaccccttcagacacacacacaaacacacactcgcacccgatcgaagaagatgtaacaacaaaccacacccaccacaaggccggtttataaatagattccatgccaatcccgccattgtttggtccacagtttatgcaattgatagtgcatatgtccagctttcggccaacgcaatgggggattgttagccaaaatgagcgggacggaatgctgcactacatcgtagtcgtggaaccgcttgtacgcgtccgttttgtctgctttgaatgggattaatgggatcaagtgcatactacgccgaagtctaacttgcgaaatgtgcacaccca…	>FBtr0340434 type=three_prime_UTR; loc=X:15325919..15328029;MD5=429dedceb589729b28ed56290c33412a; length=2111; parent=FBgn0004924; release=r6.38; species=Dmel;	915	850	-1	c(603, 621, 705)	FBgn0004924	5	1	1	0	3	Top1
FBtr0308699	atgggttctcctcacagccacgcctagacacaaacacacaagtacgccgacccttcctccacccaccaccaccccttcagacacacacacaaacacacactcgcacccgatcgaagaagatgtaacaacaaaccacacccaccacaaggccggtttataaatagattccatgccaatcccgccattgtttggtccacagtttatgcaattgatagtgcatatgtccagctttcggccaacgcaatgggggattgttagccaaaatgagcgggacggaatgctgcactacatcgtagtcgtggaaccgcttgtacgcgtccgttttgtctgctttgaatgggattaatgggatcaagtgcatactacgccgaagtctaacttgcgaaatgtgcacaccca…	>FBtr0308699 type=three_prime_UTR; loc=X:15325919..15326956;MD5=94033b5695b88ea6a4b779ed286b9c29; length=1038; parent=FBgn0004924; release=r6.38; species=Dmel;	915	850	-1	c(603, 621, 705)	FBgn0004924	5	1	1	0	3	Top1
FBtr0076785	cgtatacccactgtatataacactctgtagcgataggaaaagatagaattgtataactccaggcaacccatataaccacatatccgtgtattatcaagtttggcctctggctctctttatcgaacctcatctatcggaagcccagagctagttgtagatctcaacagactgagtattgtcccaccccgctcccattatgcgttgtatataacataaacataggtgtactatagaaaaggtctcaaaaaaaaaaaatccattgtaagtaggttctaaattgttgtagtttgtagcaagaacccatcgtttccataggttagccttatccagtaagtgccatcgaggcgcaaacaaggatctctgatacgaaatcgaaccttaaaacctaatcctaagtta…	>FBtr0076785 type=three_prime_UTR; loc=3L:complement(7763233..7764212);MD5=33bd5a3a3e882caca1aaa9af2d757ea2; length=980; parent=FBgn0023076; release=r6.38; species=Dmel;	882	c(840, 915)	-1	c(12, 203)	FBgn0023076	5	1	2	0	2	Clk
FBtr0334648	cgtatacccactgtatataacactctgtagcgataggaaaagatagaattgtataactccaggcaacccatataaccacatatccgtgtattatcaagtttggcctctggctctctttatcgaacctcatctatcggaagcccagagctagttgtagatctcaacagactgagtattgtcccaccccgctcccattatgcgttgtatataacataaacataggtgtactatagaaaaggtctcaaaaaaaaaaaatccattgtaagtaggttctaaattgttgtagtttgtagcaagaacccatcgtttccataggttagccttatccagtaagtgccatcgaggcgcaaacaaggatctctgatacgaaatcgaaccttaaaacctaatcctaagtta…	>FBtr0334648 type=three_prime_UTR; loc=3L:complement(7763233..7764212);MD5=33bd5a3a3e882caca1aaa9af2d757ea2; length=980; parent=FBgn0023076; release=r6.38; species=Dmel;	882	c(840, 915)	-1	c(12, 203)	FBgn0023076	5	1	2	0	2	Clk
FBtr0333816	ggttccttatgatgcgggggtctaattcagggacaattcttcaaggtgctggcaacatgtggtcctatgagcgtctccttctttacggtggtggttttctttggatcgttttatctaatcaatctgatgttggctgtagtggcgttaagctacgaggaggaagcggagataacgaacgaggaacgtaagaaggatctcttggaccaccgggatgactctacttttagctttgatccctcggtgctcaacgtaaaaaaactaaataagaacaacaaaaaaaagatcgactcacggaaaggagtcctcttggcatcgtacagcaagaaaaaaactaggcgaaaaaaaaccaaaggggggaaggaaggtggcaccaacggcaatgggaacggcagcaacggg…	>FBtr0333816 type=three_prime_UTR; loc=2R:join(24905202..24905381,24905437..24906172,24906228..24906442,24906499..24906669,24906725..24906918,24906980..24907082,24907145..24907273,24908479..24908721,24908776..24910910,24910964..24911291,24911353..24911453,24911999..24913809,24913873..24914542,24914650..24915009,24915114..24915222,24915281..24915462,24916772..24916890,24917320..24917577,24917648..…	-1	c(6100, 9336, 9563, 10580)	-1	5317	FBgn0085434	5	0	4	0	1	NaCP60E
FBtr0112753	cccgtggtggtgcctgtgctcctgatgccacccgccagccaagctccggggacagcagtcgctgctccaaccgctgccgttgctccagctgccatcgccggtccacagccgcaggggcagttttacaatgcccaactggagccggctgcctatgcctgtgttcctgtcttgcccctcaaaccgataagcaatggagtgggaaccaatagtcatcagcaccatcatcatcatcaccaacagcagcagcatcatcatcaccaacgtccgcaccagaacatccacaatcacaaccagattcagaaccagaaccagaaccagaaccagaacaaacgcaaattttcaaccttcttttagggaactaagggaactagccctagttcgtgaccttttttttacgaa…	>FBtr0112753 type=three_prime_UTR; loc=X:complement(9324508..9327258);MD5=170a5f905115d1c78c9068957d6936c4; length=2751; parent=FBgn0085478; release=r6.38; species=Dmel;	1248	c(1061, 1690)	-1	c(467, 1006)	FBgn0085478	5	1	2	0	2	Zdhhc8
FBtr0343028	cccgtggtggtgcctgtgctcctgatgccacccgccagccaagctccggggacagcagtcgctgctccaaccgctgccgttgctccagctgccatcgccggtccacagccgcaggggcagttttacaatgcccaactggagccggctgcctatgcctgtgttcctgtcttgcccctcaaaccgataagcaatggagtgggaaccaatagtcatcagcaccatcatcatcatcaccaacagcagcagcatcatcatcaccaacgtccgcaccagaacatccacaatcacaaccagattcagaaccagaaccagaaccagaaccagaacaaacgcaaattttcaaccttcttttagggaactaagggaactagccctagttcgtgaccttttttttacgaa…	>FBtr0343028 type=three_prime_UTR; loc=X:complement(9324508..9327258);MD5=170a5f905115d1c78c9068957d6936c4; length=2751; parent=FBgn0085478; release=r6.38; species=Dmel;	1248	c(1061, 1690)	-1	c(467, 1006)	FBgn0085478	5	1	2	0	2	Zdhhc8
FBtr0343029	cccgtggtggtgcctgtgctcctgatgccacccgccagccaagctccggggacagcagtcgctgctccaaccgctgccgttgctccagctgccatcgccggtccacagccgcaggggcagttttacaatgcccaactggagccggctgcctatgcctgtgttcctgtcttgcccctcaaaccgataagcaatggagtgggaaccaatagtcatcagcaccatcatcatcatcaccaacagcagcagcatcatcatcaccaacgtccgcaccagaacatccacaatcacaaccagattcagaaccagaaccagaaccagaaccagaacaaacgcaaattttcaaccttcttttagggaactaagggaactagccctagttcgtgaccttttttttacgaa…	>FBtr0343029 type=three_prime_UTR; loc=X:complement(9324508..9327258);MD5=170a5f905115d1c78c9068957d6936c4; length=2751; parent=FBgn0085478; release=r6.38; species=Dmel;	1248	c(1061, 1690)	-1	c(467, 1006)	FBgn0085478	5	1	2	0	2	Zdhhc8
FBtr0308591	gcttagcttaaagaaaaaaaaaagaaaccaaaacaatgaagtccaacaagaaacaaccgaaagaacccaagaaacaaaactaaaaaatacgaataccttataagtttattaaaagagagagaataaataaaagaaaaaaaacaatacttaataagcaaagaagtctgtaagttaagcccgaaacaggatcaaatgatatcgaaatacagaggggaacaagagaaaagttaactgaaccggaaattgaaccaaaaaccgaaccgttccgaaccgttttgcacatctgagataaacccactttgtcgtcgtcgtttcttcctttcgctcgctcttcgctcttctttcgaccttcacccgaaccacactgatccactggcaaccacttgaaccactcgaacc…	>FBtr0308591 type=three_prime_UTR; loc=X:complement(join(9324508..9328286,9328353..9328594,9330936..9331441));MD5=2c7e4f2b232c09b482012c32659d6795; length=4527; parent=FBgn0085478; release=r6.38; species=Dmel;	3024	c(2837, 3466)	-1	c(2243, 2782)	FBgn0085478	5	1	2	0	2	Zdhhc8
FBtr0307304	aatacgatttcgagccaggcggggacggccactctgctccaggcagccgccgtaatggccgccagcgagccagcggaatccctgagcatatcagccatgcccgtctccgttccaatgggcatggcgcacagtttcctcatcaacaacttcgtaacggtggctgcaccgccggtggccacggtgaccagcacgggcctgcagtacttggacaagtcgtaggtccggacaccgagcccccaaattgatcgatacaggtattagagaaacggcagcaatctactgtatatatagcggaccgcttgtacggcacagtggcaatatatgcagcgatatatgccgacccaggatggcacagaagtggaatcggattcctgcgctgagctgagctgagctaagcga…	>FBtr0307304 type=three_prime_UTR; loc=3L:3153534..3155678;MD5=07cac4f5c3b66f6957681ba43ef3af23; length=2145; parent=FBgn0263108; release=r6.38; species=Dmel;	-1	c(649, 1460, 1473)	-1	c(281, 1258)	FBgn0263108	5	0	3	0	2	BtbVII
FBtr0347552	tcatgtggcgactggacaagcaatagccgaggaagcagcggtgttgttcggccgatcgagaaccataattacatttaattacaatttttacactgccaaaaagttaagtaaattaaagttaatttttgctaagccaaaactctgtttaaagcgaggatcacacagatcagacacgagcactacggaaagggtggatttacgagggtggtaaaattcgggttcttgaagttatataggttattgtccgtacaatcttggagaacttgtatatagttttaccttccagaaattcactcgccctaatgcacaaacaagccacacacacgaatcacatcagctgcaaacacaagaggaagatgaacaacgactattttaaataatgaaaggaagtacttaagc…	>FBtr0347552 type=three_prime_UTR; loc=3L:991164..993788;MD5=fac01482ac3fdfc7fd29b276a2228b96; length=2625; parent=FBgn0264574; release=r6.38; species=Dmel;	c(1168, 1423, 1782)	2195	-1	265	FBgn0264574	5	3	1	0	1	Glut1-
FBtr0333501	gcgattccgcggactcactgcatcctgaatcctgcatcctcccctagattcaccctacttcggccgcaaatacctggtggtctcgaagcgacgatcgcagagcctggacgaagactaatcatgtggcgactggacaagcaatagccgaggaagcagcggtgttgttcggccgatcgagaaccataattacatttaattacaatttttacactgccaaaaagttaagtaaattaaagttaatttttgctaagccaaaactctgtttaaagcgaggatcacacagatcagacacgagcactacggaaagggtggatttacgagggtggtaaaattcgggttcttgaagttatataggttattgtccgtacaatcttggagaacttgtatatagttttacct…	>FBtr0333501 type=three_prime_UTR; loc=3L:991046..993687;MD5=938121a2a5d4207174acae7c669512d1; length=2642; parent=FBgn0264574; release=r6.38; species=Dmel;	c(1286, 1541, 1900)	2313	-1	383	FBgn0264574	5	3	1	0	1	Glut1-
FBtr0345689	ctgaggagcgcctcgcctcctgactctgccagtgttcgttccacgagtcgcgctgaggagccgcaccagccgcagcaggtgcaccatcaacagcagcaggtgcaccaccaacagcaacatcagtcgcgctatgccacacacgaatacgtacactgtagctatgagaaggaagtcgtatgtgatcaggccaatccctcgcaagcaccaccacagcagccagcaccaccagtacagcagcaccagcaacagccaccaccgccattgcaccactgccagcagcgtaagcacagccatagtccgcaccacagtcgccacacctcgccgcactcgcaccatcaccattcgcaccacagtcgccacagtcggaggagtcgtcgccagggtagcggcagtctgccg…	>FBtr0345689 type=three_prime_UTR; loc=3L:988712..993788;MD5=83ca019efd3644984b0ae7dbf7195b8c; length=5077; parent=FBgn0264574; release=r6.38; species=Dmel;	c(3620, 3875, 4234)	4647	-1	2717	FBgn0264574	5	3	1	0	1	Glut1-
FBtr0345690	ctgaggagcgcctcgcctcctgactctgccagtgttcgttccacgagtcgcgctgaggagccgcaccagccgcagcaggtgcaccatcaacagcagcaggtgcaccaccaacagcaacatcagtcgcgctatgccacacacgaatacgtacactgtagctatgagaaggaagtcgtatgtgatcaggccaatccctcgcaagcaccaccacagcagccagcaccaccagtacagcagcaccagcaacagccaccaccgccattgcaccactgccagcagcgtaagcacagccatagtccgcaccacagtcgccacacctcgccgcactcgcaccatcaccattcgcaccacagtcgccacagtcggaggagtcgtcgccagggtagcggcagtctgccg…	>FBtr0345690 type=three_prime_UTR; loc=3L:988712..993788;MD5=83ca019efd3644984b0ae7dbf7195b8c; length=5077; parent=FBgn0264574; release=r6.38; species=Dmel;	c(3620, 3875, 4234)	4647	-1	2717	FBgn0264574	5	3	1	0	1	Glut1-
FBtr0342823	tcgctacacgttaggttttctgaggcaccggtatctccgactccggtttagaggtggagtcgggtccgccggttcgcagtcagaagatgtcgagtccgacaagccaccttacttccatttcgcccctgaaaagaaagaaaagaaaaaaagaaaagaaacgaaacgaaagacccactcaaaaatgggcttacttcaaagaaaatcaattttgaacaaaagcttgttaggccagcccgaaaaccaaaccaaaccaaactaaataaataagaaattgcgaaaagagtaataatgcttaaatgtataagaaaagaaagaattttcaaggattaggctttgttaagcaggtttgatcgttcgctgattttactaattccccactcaattgaatgacacatatat…	>FBtr0342823 type=three_prime_UTR; loc=X:complement(2476259..2480725);MD5=418192dd6462a38b85663eb63c12714e; length=4467; parent=FBgn0284408; release=r6.38; species=Dmel;	c(1722, 3797)	-1	-1	c(562, 635, 693)	FBgn0284408	5	2	0	0	3	trol-
FBtr0474226	ttagaacggcaggagcaggagaaggagcaacagcaccaccagcacgagcagcaacagttccaacagcaacagtggtcagaggatgcattgggagcgacacttttggctgaaactgaaactgaaccaccactagcaacagcatcgatagcgccaccaccaccatcatctcaaccaccatcatcaccgtcaacaacagcacccagaacccaagtccaaaaccagaccagatccacgaccatcaatagcagcaacaggaagaagaagaacaaggccaagactcagagtaagcaacagacgcagacagcaacagaagcagaaagcaattgcaacgagaagccgaccacagcaaccatgacaaggacaacaacaaagaagagcagcaggatcaagcaaatggca…	>FBtr0474226 type=three_prime_UTR; loc=2R:complement(7737019..7740276);MD5=f1ffa7437dd4fc4d1db7679c04df9337; length=3258; parent=FBgn0286778; release=r6.38; species=Dmel;	1574	c(2299, 2312)	-1	c(2338, 2912)	FBgn0286778	5	1	2	0	2	CG46385
FBtr0347029	tccacaagcaattgcaattgcgatcccagcccaaagccaagctcccggtcactaggacaccatctagctactccacctcgtctgattaaaaatgaaaatggaaatgaaaaggaaaaatataaaggccactgcgagcgaattgtgtcgaaggcttgcgagaacgagaacataagtagtaactttatgttaagattttcagtttaagaattgcctaccgtatttttttttttataaaatcaacccacttttagccacccactttgtgcacatacatgcagcaaatgtacgtaaaacacacaaaaatcacacgcatgaatagggttaagttatgttttagttgatagcacttaagaaaaaagtcatgtcgattgtaatgacaccagaagatgtttatgttat…	>FBtr0347029 type=three_prime_UTR; loc=X:16795319..16797742;MD5=534adedff5b6b5e264d6ea012b567796; length=2424; parent=FBgn0030790; release=r6.38; species=Dmel;	636	-1	-1	c(1641, 1656, 2073, 2391)	FBgn0030790	5	1	0	0	4	CG4768
FBtr0307553	gtcggggggcgcagaggcaagtaaagcaatgggccgagttcccggctagagcagcacaccgccagctacttgcacctctgagatccgaaaatccttatcgaaaaccaaaaacgaaataaatcgaacgacgttgaagttgaagtagaaggcttacacaaacaagtgaacaataagcgcagcagcagtaatcaccattgaatccatcacataacacagcaacagcagaggcttaatgacaaattaaaagcatagcaacgtctgtctttcgggcgaaaggagatgcacataattcaccgaaatcaataatataatcacagcacttacataactcacaaacaatataataataattgacagcacaggcttcacacaaaacacgtccattgaatcaaacactga…	>FBtr0307553 type=three_prime_UTR; loc=X:complement(join(18322958..18326775,18327195..18327255));MD5=c2652d5670db660b0500c436649b40ce; length=3879; parent=FBgn0030913; release=r6.38; species=Dmel;	3483	c(3516, 3712)	-1	c(987, 2716)	FBgn0030913	5	1	2	0	2	CG6123
FBtr0343590	gccagcacgtctagaggaaaggatgtggatgtggatgtggatgtggacgtggaaacggaaacggaaaagacaagaacaaagtattagataaatgaatttcataatcacaagcgcacatttaccatcattccccacgcatgtcttctcatttgccatccaacaaagcgcaccaattgttacccgtttagttatacaaattcgaatatgtatgaaccaataaaccaattaaaatgtccttcgctgctgccgtttgcgttcacacaactgcaatttacggcactggacacgattttcgattgcaacgtaagccagtggcgtagattgcagattgtgccgccaaccaagatattgtacttcgtcgtcaaccaggtcatccgcgataagcttggccactctgtt…	>FBtr0343590 type=three_prime_UTR; loc=X:complement(19559431..19561576);MD5=a15e53c5e75944f664af47b6ad3a76c3; length=2146; parent=FBgn0026430; release=r6.38; species=Dmel;	-1	c(1188, 1294)	-1	c(834, 1178, 1320)	FBgn0026430	5	0	2	0	3	Grip84
FBtr0076308	taaattaatgtcgcccagttggaattccaccgccaatgcagcccccgagtgcagctgaaatgatttatactccaagttacaggagcatcgggagccgaagcaggagcagcagcatctgaggtccttccactcgagctgcatgtaatacctatctgaaaaatcaactaattatgctaatgatggaaggagccgcgacgctgctcctggaactgctcctcctgctcggtggcaagttgtaagtaagcgtgtttctaattaagtgggctggggattagttagttaggcggaaatcggagccatgtacataaacttctcacgtaaattgccagcacactagcgaaactagctaaatggaaagcatttcgaacgaatcatcaaattagagaactatattcaagt…	>FBtr0076308 type=three_prime_UTR; loc=3L:complement(10147454..10149340);MD5=8051dee843d7f4a678a8b5cb6e78b92c; length=1887; parent=FBgn0052057; release=r6.38; species=Dmel;	c(675, 1353)	c(300, 755)	-1	565	FBgn0052057	5	2	2	0	1	dpr10
FBtr0076309	taaattaatgtcgcccagttggaattccaccgccaatgcagcccccgagtgcagctgaaatgatttatactccaagttacaggagcatcgggagccgaagcaggagcagcagcatctgaggtccttccactcgagctgcatgtaatacctatctgaaaaatcaactaattatgctaatgatggaaggagccgcgacgctgctcctggaactgctcctcctgctcggtggcaagttgtaagtaagcgtgtttctaattaagtgggctggggattagttagttaggcggaaatcggagccatgtacataaacttctcacgtaaattgccagcacactagcgaaactagctaaatggaaagcatttcgaacgaatcatcaaattagagaactatattcaagt…	>FBtr0076309 type=three_prime_UTR; loc=3L:complement(10147454..10149340);MD5=8051dee843d7f4a678a8b5cb6e78b92c; length=1887; parent=FBgn0052057; release=r6.38; species=Dmel;	c(675, 1353)	c(300, 755)	-1	565	FBgn0052057	5	2	2	0	1	dpr10
FBtr0076310	taaattaatgtcgcccagttggaattccaccgccaatgcagcccccgagtgcagctgaaatgatttatactccaagttacaggagcatcgggagccgaagcaggagcagcagcatctgaggtccttccactcgagctgcatgtaatacctatctgaaaaatcaactaattatgctaatgatggaaggagccgcgacgctgctcctggaactgctcctcctgctcggtggcaagttgtaagtaagcgtgtttctaattaagtgggctggggattagttagttaggcggaaatcggagccatgtacataaacttctcacgtaaattgccagcacactagcgaaactagctaaatggaaagcatttcgaacgaatcatcaaattagagaactatattcaagt…	>FBtr0076310 type=three_prime_UTR; loc=3L:complement(10147454..10149340);MD5=8051dee843d7f4a678a8b5cb6e78b92c; length=1887; parent=FBgn0052057; release=r6.38; species=Dmel;	c(675, 1353)	c(300, 755)	-1	565	FBgn0052057	5	2	2	0	1	dpr10
FBtr0331552	taaattaatgtcgcccagttggaattccaccgccaatgcagcccccgagtgcagctgaaatgatttatactccaagttacaggagcatcgggagccgaagcaggagcagcagcatctgaggtccttccactcgagctgcatgtaatacctatctgaaaaatcaactaattatgctaatgatggaaggagccgcgacgctgctcctggaactgctcctcctgctcggtggcaagttgtaagtaagcgtgtttctaattaagtgggctggggattagttagttaggcggaaatcggagccatgtacataaacttctcacgtaaattgccagcacactagcgaaactagctaaatggaaagcatttcgaacgaatcatcaaattagagaactatattcaagt…	>FBtr0331552 type=three_prime_UTR; loc=3L:complement(10147454..10149340);MD5=8051dee843d7f4a678a8b5cb6e78b92c; length=1887; parent=FBgn0052057; release=r6.38; species=Dmel;	c(675, 1353)	c(300, 755)	-1	565	FBgn0052057	5	2	2	0	1	dpr10
FBtr0077769	tgggttcgccataggtcactgatatatatcatagcttttagttgtagtcggaaatcgtttgacgtttattgtttgttctcggtgtgccgttaaagttttcccccctttttctctctatttgttgagttccatcgatggagggatccgtggacctttcagaagtatataaatatataactaaagagtaacgaatttgtcagcgaataaggggattccacatgccacactaacacaatgaaactatgtacctaacagagaaactacatatgcatacacagcaataccgataaccactaccaataccattagcccacatagacccaaactggcctaatcgatctataaagcatatatagtatatactattagggtctcgcttacgcgaatttctatttacaa…	>FBtr0077769 type=three_prime_UTR; loc=2L:2407699..2410662;MD5=015f573d669bf09a5cdbbb4e917aa021; length=2964; parent=FBgn0031424; release=r6.38; species=Dmel;	c(1143, 2103)	2165	-1	c(1877, 2516)	FBgn0031424	5	2	1	0	2	VGlut
FBtr0307078	tgggttcgccataggtcactgatatatatcatagcttttagttgtagtcggaaatcgtttgacgtttattgtttgttctcggtgtgccgttaaagttttcccccctttttctctctatttgttgagttccatcgatggagggatccgtggacctttcagaagtatataaatatataactaaagagtaacgaatttgtcagcgaataaggggattccacatgccacactaacacaatgaaactatgtacctaacagagaaactacatatgcatacacagcaataccgataaccactaccaataccattagcccacatagacccaaactggcctaatcgatctataaagcatatatagtatatactattagggtctcgcttacgcgaatttctatttacaa…	>FBtr0307078 type=three_prime_UTR; loc=2L:2407699..2410662;MD5=015f573d669bf09a5cdbbb4e917aa021; length=2964; parent=FBgn0031424; release=r6.38; species=Dmel;	c(1143, 2103)	2165	-1	c(1877, 2516)	FBgn0031424	5	2	1	0	2	VGlut
FBtr0344063	gaatttatgcttactaagtgccatatgtttaagtttgcaaggtttttcttgcctagtctacagttaaagccaataaatggtaaatggtgttcaaatgctgaaatgaatcgaaattaaagattacacacatttgtatgtacatacatatgtatgtacatacatacgcttgaaccgttttttttaccgctgactgggattgtccgttgacttttcttatcactctgaatcatccagctaaatatgtacataagtcaaaaagaagacttcacactgattactaaataggcacatatgtatgttgtttgaactgcacaaatcgcataatattaacaccaaactgaaataacccgatgcacttgtaaatacttaaccgattcagaaccgtttcaagaaaatgct…	>FBtr0344063 type=three_prime_UTR; loc=2L:complement(7994388..7995006);MD5=b990996080bf0a80869acac1d7bc5366; length=619; parent=FBgn0031970; release=r6.38; species=Dmel;	358	c(136, 152, 242)	-1	-1	FBgn0031970	4	1	3	0	0	CG7227
FBtr0080972	ctgcattaagccacaaggcggctatttccctccacaacacacacttttcaccgatttttccgtcttcgctttgcatagaaaataaagaaactcactgagaatcaaaaacaggaaatgaacaaaaaaaaaaaaaaaaaaagtaattcaagcaaaacgaaagaaatgcagctaatttctttatgccgttaacaaaagctttcatgaatttaatttgaaacaaaccctatctagagaataaattacatttacttgtctgagaatgagaaaaattgtatatgaaaaagcgtgctaatgttttaactctcttaggaatgttaaagcctgtgtcgaatgaaaaatccaactgtaaatagttaatgtttaatatatatatttatgtatctgtattgtatgttatta…	>FBtr0080972 type=three_prime_UTR; loc=2L:complement(17187637..17189949);MD5=5854477e6221ea9c03eaf8c49a8efb04; length=2313; parent=FBgn0032629; release=r6.38; species=Dmel;	c(345, 1427, 1496, 2191)	-1	-1	-1	FBgn0032629	4	4	0	0	0	beat-IIIc
FBtr0479923	acaccgacgaggaattccgtgggggaatgaacgatatggacagggaaaccatgaggcgtatatagcaaacaaacaaaaatcgattgacaatcgcattaagcaagcggcaagcattgtttaccactgttagaatttatgcttagacgaatttgggtctaaaaatcaatgtcacgtgtacgtagtagttaaaggcatttcttcactaggtctatctaaatctatagctcaagcccctttcttcttcaatcacttctctatctatcccttaagtagaaaacactgcgactcgctgtaggttataagtcaagccaaggattggtacaagttcaaattgaattgttattgactattgtaggcaagtgcaatatttatgttgaagtaacacgaaatacgaatatg…	>FBtr0479923 type=three_prime_UTR; loc=3R:complement(9463410..9466489);MD5=ad06b175d4cd6307c164fe9343bb1131; length=3080; parent=FBgn0037698; release=r6.38; species=Dmel;	c(1032, 1682)	404	-1	2719	FBgn0037698	4	2	1	0	1	CG16779
FBtr0347361	cggccgcaaacaaacaatttgtaatttaagtgtaatgtccgagatttttacccagtttattagagaccatttatggtcggcaaataattcaattttttcattttttgatttgtcatagttaaatttttatttaaattattttgcatgtacttaatctcatttgcgcgataagtgttattaagataaatcttcaacaataagatcttttaagtaggccacgaaactgtttatattttgcttgttattattatgatgccggcccttcaaaaaatcggatataatttttatatgtaacttgttgatcatttatatttacaacttggcgctcaggcgattattaataataatattattagcagtgggcgctcatttgtgagttgcgtattaattgaatgtaag…	>FBtr0347361 type=three_prime_UTR; loc=3R:complement(9787816..9789429);MD5=107cbd3b8f199386b2343b9dd7e7cae9; length=1614; parent=FBgn0037755; release=r6.38; species=Dmel;	539	1590	-1	c(477, 500)	FBgn0037755	4	1	1	0	2	CG12945
FBtr0334025	ataaactaatcaagtataccccataaaatatccttgtaaataggggggtttgaatactaaacccttgtacagttagtcatatctcttgagctaagcatactaaatatcaaaactgtcctgcgtgtacatcgtcaaagcaatagttgtttaaccaatatatatactaaactcgaagcggagagcccaaagtttcttgataggattatcggagatggttgccataccaccaagttttcgctctgtttcaaaagcaagaacttgtcgcaaagcaaagaacttataggtcttaagtgtttttccaatgtgattgccaaattctacattataatactaaactttattgaaacctgcaaaactaatttataatctagttgtaaaatagatatgaccataatgtta…	>FBtr0334025 type=three_prime_UTR; loc=3R:15687937..15690513;MD5=a7a902b2911e5b794023d115f1ecacba; length=2577; parent=FBgn0053207; release=r6.38; species=Dmel;	c(35, 1176, 2148)	2022	-1	-1	FBgn0053207	4	3	1	0	0	pxb
FBtr0083377	aaaaaaaaaaaaaaacgggcctcaagagcccggcttcttgtatataggtacccggacggtattaagtagactcttgtacataagcaagcgtagttttaactatttgtatatagtacgtacgttgtatataggacctgtggtttttataaggatagagttggaaaaactctaggtgcaatacgagtgcgacagtgactgctaaagccgaactatggaatgtggattgtattttaggacgtgtacattctcataattttagtcctatgaaagatcgcaaaaatagttaatggaataaacgaaatacttgcccttag	>FBtr0083377 type=three_prime_UTR; loc=3R:complement(16983510..16983823);MD5=de552b460b60ba8a9ce3034767d72ae7; length=314; parent=FBgn0038460; release=r6.38; species=Dmel;	-1	75	-1	c(39, 105, 123)	FBgn0038460	4	0	1	0	3	CG18622
FBtr0346338	aaaaaaaaaaaaaaacgggcctcaagagcccggcttcttgtatataggtacccggacggtattaagtagactcttgtacataagcaagcgtagttttaactatttgtatatagtacgtacgttgtatataggacctgtggtttttataaggatagagttggaaaaactctaggtgcaatacgagtgcgacagtgactgctaaagccgaactatggaatgtggattgtattttaggacgtgtacattctcataattttagtcctatgaaagatcgcaaaaatagttaatggaataaacgaaatacttgcccttag	>FBtr0346338 type=three_prime_UTR; loc=3R:complement(16983510..16983823);MD5=de552b460b60ba8a9ce3034767d72ae7; length=314; parent=FBgn0038460; release=r6.38; species=Dmel;	-1	75	-1	c(39, 105, 123)	FBgn0038460	4	0	1	0	3	CG18622
FBtr0337065	aaaaaaaaaaaaaaacgggcctcaagagcccggcttcttgtatataggtacccggacggtattaagtagactcttgtacataagcaagcgtagttttaactatttgtatatagtacgtacgttgtatataggacctgtggtttttataaggatagagttggaaaaactctaggtgcaatacgagtgcgacagtgactgctaaagccgaactatggaatgtggattgtattttaggacgtgtacattctcataattttagtcctatgaaagatcgcaaaaatagttaatggaataaacgaaatacttgcccttag	>FBtr0337065 type=three_prime_UTR; loc=3R:complement(16983510..16983823);MD5=de552b460b60ba8a9ce3034767d72ae7; length=314; parent=FBgn0038460; release=r6.38; species=Dmel;	-1	75	-1	c(39, 105, 123)	FBgn0038460	4	0	1	0	3	CG18622
FBtr0334916	cgaccacttgggttcgcggctggctggtggaatctaatcatcagctcgctgcggaccctgttcgccgctcgcgacgatgatcgtggataatatacgatgagccaaaccatgagtatttcctcggcgttgtacaacactaacagcagcagcagcagcatcagtatgagcaacgccagtgacagtggcagtgtcatcggcagtgctgtaaaggttattgtgagtagtgttggcagcaccaacgaaacggatgactcgtggagcccatcgtaaatgtgcgcgaggcgagtgaagtgaacattgcgaaatgaattgagatacaatcgaatggaggcaagtttttggagcagttgatcaaaatatgtatgtaatgtaatttgatggggttgtagtgttgattaa…	>FBtr0334916 type=three_prime_UTR; loc=3R:complement(24393896..24401738);MD5=6872ae4d4c2e16dd056d9b8ec2ffb22b; length=7843; parent=FBgn0000036; release=r6.38; species=Dmel;	3496	5953	-1	c(4857, 4979)	FBgn0000036	4	1	1	0	2	nAChRalpha1
FBtr0333664	gacgcgagttttgtttggtaatttgaatgaaacactctcaccatgcatacaccattcacaaccaccccccatacacccacaaccactaccacatgtgaacagcagccccccacatccattaatattcatagaaccacacacaaacactcatacgaagttggttttcctttgagtttggctaagttagtagtccgatacacggaaggcaaattaagtattatatttaaggcgccctcgagcgagttcgataaatactaactaatatatatatatataacaaatcataagcaatataagcgagaaaaaagaacaaaaacggaagcaaagcaaagcgaaggaaaaacaaaatttaaaaccaaaaagcaaaaattacggagcgttagagaagcaaaagaagaa…	>FBtr0333664 type=three_prime_UTR; loc=3R:25600748..25608423;MD5=443c406724e61209125372c507dc2291; length=7676; parent=FBgn0011666; release=r6.38; species=Dmel;	1576	c(1752, 6719)	-1	3677	FBgn0011666	4	1	2	0	1	msi
FBtr0344022	tagatgcaatgactaataaacaagtaaaaaaaatttgtatattaaaactagcgaaccgttcggaataggatttagagcggggatcttcgtacggttcggttttcttttttggttacactctaggcccaatattgtcccggggtatttatcaatgatttttattcccttattttaagtccttaccctttcacatgtacttgttagcagaattttgctgaaatgatgtttccaaaactgaataaaaccaaatgaactagaaaaaaatattttggacattggggcactaacaaaaatagattcttattaaaattggcgaaacgttgagacaaagcggaattggagtaacggcgaagtttataacagtggaagataaacatgagaaatatgtgagaacaattt…	>FBtr0344022 type=three_prime_UTR; loc=2L:complement(22124285..22128520);MD5=5b1d35fd84facfa4be3545490affe3b9; length=4236; parent=FBgn0025674; release=r6.38; species=Dmel;	4226	c(3208, 3216)	-1	2682	FBgn0025674	4	1	2	0	1	CycK
FBtr0071068	agtaaaaaaattaacagaactaaatataaattcagtgcaatgtgtagagaagcggagatggttaacgcgtttacttgtgattaagtttgaatgtttagacgatgtgaggagccaggagacatacatacatatatatattaatagcacttaggctctagaaaactatatttttttgttttttttttattaaacattaactactaaatataggcgttagttgtagccgttaaggtagccttaggttgaggagttgtaatagttgtagctaaaagtttagagacgctatgcgatgatgataattatgatgagagagcagcgcaaaagtattaatgagaaaataaaccccatttaagaaccccgacttgccgaagaactttaaccaaaatgtcgagatccaat…	>FBtr0071068 type=three_prime_UTR; loc=X:7674618..7678259;MD5=666aa72a38b5c13ad3e94970c410de2f; length=3642; parent=FBgn0004198; release=r6.38; species=Dmel;	c(575, 2856)	c(616, 3078)	-1	-1	FBgn0004198	4	2	2	0	0	ct
FBtr0305134	agtaaaaaaattaacagaactaaatataaattcagtgcaatgtgtagagaagcggagatggttaacgcgtttacttgtgattaagtttgaatgtttagacgatgtgaggagccaggagacatacatacatatatatattaatagcacttaggctctagaaaactatatttttttgttttttttttattaaacattaactactaaatataggcgttagttgtagccgttaaggtagccttaggttgaggagttgtaatagttgtagctaaaagtttagagacgctatgcgatgatgataattatgatgagagagcagcgcaaaagtattaatgagaaaataaaccccatttaagaaccccgacttgccgaagaactttaaccaaaatgtcgagatccaat…	>FBtr0305134 type=three_prime_UTR; loc=X:7674618..7678259;MD5=666aa72a38b5c13ad3e94970c410de2f; length=3642; parent=FBgn0004198; release=r6.38; species=Dmel;	c(575, 2856)	c(616, 3078)	-1	-1	FBgn0004198	4	2	2	0	0	ct
FBtr0331733	agtaaaaaaattaacagaactaaatataaattcagtgcaatgtgtagagaagcggagatggttaacgcgtttacttgtgattaagtttgaatgtttagacgatgtgaggagccaggagacatacatacatatatatattaatagcacttaggctctagaaaactatatttttttgttttttttttattaaacattaactactaaatataggcgttagttgtagccgttaaggtagccttaggttgaggagttgtaatagttgtagctaaaagtttagagacgctatgcgatgatgataattatgatgagagagcagcgcaaaagtattaatgagaaaataaaccccatttaagaaccccgacttgccgaagaactttaaccaaaatgtcgagatccaat…	>FBtr0331733 type=three_prime_UTR; loc=X:7674618..7678859;MD5=4c7444834e25800cc065c2860aed640f; length=4242; parent=FBgn0004198; release=r6.38; species=Dmel;	c(575, 2856)	c(616, 3078)	-1	-1	FBgn0004198	4	2	2	0	0	ct
FBtr0071349	ggcggaggttgcccggagaacttgtagtcgtatatatatagatgtctgactatgtgatattctgcaccccaaaaacaaaaaaaaaaaaacaaacaaacaaaaacaaaaacaaatgaacaaaggacgcgaagagaactgtgtacataccccttgccgcgttagttggtcctttcctatccaaaatattaaatcctggattttgattcgatatgatagataagatttggaatcgaatcgattcgaatcgaattgaattgaattggagagtcaagcaaatttcgctcaactaagttaagttttatcctctgccattcgtagatcccaatgccaaaccagcgcagtcatatacatatacacgcatgattaacatacatacatagctctatatacatatacata…	>FBtr0071349 type=three_prime_UTR; loc=X:complement(9123481..9125243);MD5=32aa19b72d471ca55d0ec8d7ea2f3d75; length=1763; parent=FBgn0030090; release=r6.38; species=Dmel;	1737	c(139, 1119)	-1	1635	FBgn0030090	4	1	2	0	1	fend
FBtr0333304	ggcggaggttgcccggagaacttgtagtcgtatatatatagatgtctgactatgtgatattctgcaccccaaaaacaaaaaaaaaaaaacaaacaaacaaaaacaaaaacaaatgaacaaaggacgcgaagagaactgtgtacataccccttgccgcgttagttggtcctttcctatccaaaatattaaatcctggattttgattcgatatgatagataagatttggaatcgaatcgattcgaatcgaattgaattgaattggagagtcaagcaaatttcgctcaactaagttaagttttatcctctgccattcgtagatcccaatgccaaaccagcgcagtcatatacatatacacgcatgattaacatacatacatagctctatatacatatacata…	>FBtr0333304 type=three_prime_UTR; loc=X:complement(9121973..9125243);MD5=96ea5b3f2c536365dd19cea72d4803f5; length=3271; parent=FBgn0030090; release=r6.38; species=Dmel;	1737	c(139, 1119)	-1	1635	FBgn0030090	4	1	2	0	1	fend
FBtr0333070	tcctgcaccactagccagccacagatccagatggctaccagcaccagcagcacgatcaccattggcaccaccgtcacaccgaacaacatggccgtcacagcaacgcatcccattgaaatggtcaccctggtcgcggcaacgcaggaggatgaggaggcagccgtggagacgacaacagcattaactgaagcagcacaattttggtcaagagattagtttagattaagcagagattgtacataaatgggaggaatgaggagagggtcgagaagcacagcatacacattaatatatatatatatatatttatatatagtagatatataaacacacacgcgagagtattcaacgtcctacgtcggtaaagaccttggaaaggggtagctttgattaaattaa…	>FBtr0333070 type=three_prime_UTR; loc=2R:complement(11577485..11579826);MD5=8e96534c05fd904413173d108c37b49a; length=2342; parent=FBgn0033636; release=r6.38; species=Dmel;	1743	c(235, 1215)	-1	1786	FBgn0033636	4	1	2	0	1	tou
FBtr0330621	gacgcggatggcagcggcagcaacagctaacatcgagcacaacccttgcaagtgcccaacggccctctgctcagtttggcatcaacgcaaacggaggcggaaacccaggcggtggccatatccatgcctttggcggacgcccacgtggccttgggccagctcctgcagcagcatcactgcagctgcaccgtttgtttggtgaacaagagcgagctggtctaaagccaatcagttagtatgtttttcagaagttcatacgcatacacaaaacccgcgcactcccacgaaaccttccaccttgttggtgtgaataaaatacgattttctgaaaagcttattcagaagcgaaatgtaaacatcagaaggggaatctgttagccagagtagaaagggccaaga…	>FBtr0330621 type=three_prime_UTR; loc=2R:11461814..11465270;MD5=8f9799f839ac8ac03029ce0ce25626e7; length=3457; parent=FBgn0000581; release=r6.38; species=Dmel;	c(732, 2111)	3289	-1	1913	FBgn0000581	4	2	1	0	1	E(Pc)
FBtr0330623	agccaatcagttagtatgtttttcagaagttcatacgcatacacaaaacccgcgcactcccacgaaaccttccaccttgttggtgtgaataaaatacgattttctgaaaagcttattcagaagcgaaatgtaaacatcagaaggggaatctgttagccagagtagaaagggccaagagagcgggatgaatatgagatattgtatagttgaatgccaccattaacaaagttcgcttaatttgattttctatagcctatatatagaagcatatgtgtgtataatgatgtaggtcttatttttcaagatcgcctaaccctaaaaccataataagaattaaaataataaaacaaaatatatatatatatgtacaatgtatatgaaaatgcatacagagaactt…	>FBtr0330623 type=three_prime_UTR; loc=2R:11462036..11465270;MD5=5e959e29cde1bfe4423251d1254afb1c; length=3235; parent=FBgn0000581; release=r6.38; species=Dmel;	c(510, 1889)	3067	-1	1691	FBgn0000581	4	2	1	0	1	E(Pc)
FBtr0345197	ttaaaaaaataggaatatgaatctgcaaccgatttaatcgcaactactcgaatacagcgacttgatgtaaatgtaaatcttttacgattttgcgtcccgccgcatctcagcaatatttatcaatctccggcattgccgattttactttaaggattttttagatcttatatacaataagataaccaaagactccgcctaatctaattattctagctttactttctaaaattacaaaatattacatatgatagtgtttacttaaattatatacgtaacatacagaaaagtacgatcccgaaacaattgtttgtacttaaatcatttaagcatactttattttactcacacacaaatattgcgaaacttactagtatataataaagttttaaaataataaaa…	>FBtr0345197 type=three_prime_UTR; loc=4:complement(538332..545662);MD5=633a0151734600dbe2557417811f5633; length=7331; parent=FBgn0026869; release=r6.38; species=Dmel;	-1	1744	-1	c(1583, 3087, 6498)	FBgn0026869	4	0	1	0	3	Tdg
FBtr0089276	ttcatgtaggaagtacgccagaggccagtgtaaatatttgttagcctaattcgccgcgtgggcgtgagtcttgtatttctattcagtgtcgtagcgtcgtaagcacattgtccttagcacatatctgtacataataagctattcctctttttagtctaatcaaatcgaaactgttatgattttctattggcttcaagtcagatgatgctctatcttaaaattccaattagaactacaacagacaacaaaattgtaaatagatagaaaaattaaacgactttcgcacaagtccacatcaatgattataaattactgaattatctttgataaactcggtttttgtatatatctgaagtagcttaaatcaaaaacgtaaactgtcaataaatcttatgtaaa…	>FBtr0089276 type=three_prime_UTR; loc=3R:complement(6707800..6708207);MD5=63be8706062b903f56be941a76267bd4; length=408; parent=FBgn0051481; release=r6.38; species=Dmel;	c(29, 252)	126	-1	341	FBgn0051481	4	2	1	0	1	pb
FBtr0089277	ttcatgtaggaagtacgccagaggccagtgtaaatatttgttagcctaattcgccgcgtgggcgtgagtcttgtatttctattcagtgtcgtagcgtcgtaagcacattgtccttagcacatatctgtacataataagctattcctctttttagtctaatcaaatcgaaactgttatgattttctattggcttcaagtcagatgatgctctatcttaaaattccaattagaactacaacagacaacaaaattgtaaatagatagaaaaattaaacgactttcgcacaagtccacatcaatgattataaattactgaattatctttgataaactcggtttttgtatatatctgaagtagcttaaatcaaaaacgtaaactgtcaataaatcttatgtaaa…	>FBtr0089277 type=three_prime_UTR; loc=3R:complement(6707800..6708207);MD5=63be8706062b903f56be941a76267bd4; length=408; parent=FBgn0051481; release=r6.38; species=Dmel;	c(29, 252)	126	-1	341	FBgn0051481	4	2	1	0	1	pb
FBtr0089278	ttcatgtaggaagtacgccagaggccagtgtaaatatttgttagcctaattcgccgcgtgggcgtgagtcttgtatttctattcagtgtcgtagcgtcgtaagcacattgtccttagcacatatctgtacataataagctattcctctttttagtctaatcaaatcgaaactgttatgattttctattggcttcaagtcagatgatgctctatcttaaaattccaattagaactacaacagacaacaaaattgtaaatagatagaaaaattaaacgactttcgcacaagtccacatcaatgattataaattactgaattatctttgataaactcggtttttgtatatatctgaagtagcttaaatcaaaaacgtaaactgtcaataaatcttatgtaaa…	>FBtr0089278 type=three_prime_UTR; loc=3R:complement(6707800..6708207);MD5=63be8706062b903f56be941a76267bd4; length=408; parent=FBgn0051481; release=r6.38; species=Dmel;	c(29, 252)	126	-1	341	FBgn0051481	4	2	1	0	1	pb
FBtr0089279	ttcatgtaggaagtacgccagaggccagtgtaaatatttgttagcctaattcgccgcgtgggcgtgagtcttgtatttctattcagtgtcgtagcgtcgtaagcacattgtccttagcacatatctgtacataataagctattcctctttttagtctaatcaaatcgaaactgttatgattttctattggcttcaagtcagatgatgctctatcttaaaattccaattagaactacaacagacaacaaaattgtaaatagatagaaaaattaaacgactttcgcacaagtccacatcaatgattataaattactgaattatctttgataaactcggtttttgtatatatctgaagtagcttaaatcaaaaacgtaaactgtcaataaatcttatgtaaa…	>FBtr0089279 type=three_prime_UTR; loc=3R:complement(6707800..6708207);MD5=63be8706062b903f56be941a76267bd4; length=408; parent=FBgn0051481; release=r6.38; species=Dmel;	c(29, 252)	126	-1	341	FBgn0051481	4	2	1	0	1	pb
FBtr0302902	ctactggtgcaaaagacgttgcgtggtataaatttggccttgacaggagttacgttggatgccagaaacgactacaaaagctgtttatatttaatttaagtagaacaaataacaaaaacaaatttaatctattgctaaattaaattaaaatctaaattaaaatctaaattaatttaattaaattatacatttaatgataaacaacactaaaacaaaaacaaaaaattcaaatccagaaataacaaaaggcaagaaatgaacggtaagagagtacgaataaatccgtatagtaaggcataaaccaaaagtccaagaactaataaacattgacaaataacactacataacagaagggacattaaagcgacagcataaacatcgaagaagtgatggcagaat…	>FBtr0302902 type=three_prime_UTR; loc=X:complement(join(17937496..17939954,17940720..17940726));MD5=be32bd53677ff28a95cc1a4d1cad1687; length=2466; parent=FBgn0003380; release=r6.38; species=Dmel;	c(467, 2274, 2337)	1771	-1	-1	FBgn0003380	4	3	1	0	0	Sh
FBtr0332968	cattagctaaattcaatcgcatcatagactccactttggagcgaccaccagtggccgtagactactccggactgccccagctgagcagtgccacactgcagcagcgcttcaacctggcctatccggagttggtgaaccaacagcagcagcagcagcagcagttgcagctgcaacagcaccaccagcaacatgatgcgaccaagcagatcagcagcctccaggggaacccccgattggatcgtggaacggacgccgttgccagcactccattaacacttcaagcacccagaactccagcaacggcgacggaggagcaacttgattcggggcatccccatgacgacgcagacgtcgtcgaccacgatgatcatccccaccacgacgaggataatcaaacga…	>FBtr0332968 type=three_prime_UTR; loc=2L:20451415..20456978;MD5=10cef7041fa5f8acdaec3310470dbc9d; length=5564; parent=FBgn0051687; release=r6.38; species=Dmel;	c(3706, 5100)	-1	4021	4897	FBgn0051687	4	2	0	1	1	CG31687
FBtr0086238	aggaataatcaacacgcaacgaaacactaaaaaggcaaaacacacctactcacacacacacacacacacgcaacactgacacacatattcaaggtgatttaagttttctatgtatcgcatggggggctcaaacataagtattataaggattgcacttagtggaaatgcaaacatattatctgataagcgaacgaagtaattgacaacgttaagagtgaaagttaatccctgaaaaactgagagaaaacctatgcattttcgtgggtcgtcataatcaacgtgatctccgacctagtggaacaaagtctacttgtttgaaaattgatttgaattggacattgaccaattgaatgaaagaacgccccagaaaataacaaaatattaccataattgtttgac…	>FBtr0086238 type=three_prime_UTR; loc=2R:20748652..20750442;MD5=8ea3f630cb25688cfd82c6debd4f94cc; length=1791; parent=FBgn0040726; release=r6.38; species=Dmel;	c(731, 1177, 1413)	1010	-1	-1	FBgn0040726	4	3	1	0	0	dpr1
FBtr0308805	accgggcacatcgtactaccaaatcctcaaaacttcaacaatattaaatacaacataacattgtttaattggacaaaacaactttatttgaatttattctttggacaggtttttattacaagaaatcctaggcaacaatgctagttgaagaaatcatgcataatatatgaatataaatatatatctaaacttaaagtatgataaaaaaatatgtatatgtctggtcaggtatacagaaataatacgtttattaggttaaatatttatgttttaagcaactttaaaatgcgcacccacacacttgcaaaaaaaaattgtaatatttctgtcttttggcacttgtacatttgtacataatgcagggcagtcactgaattagttatttttaaattcattatc…	>FBtr0308805 type=three_prime_UTR; loc=4:complement(867824..871492);MD5=566d6577ee785d33d4667c457b170e31; length=3669; parent=FBgn0025726; release=r6.38; species=Dmel;	441	349	-1	c(1008, 2573)	FBgn0025726	4	1	1	0	2	unc-13
FBtr0335417	atgccgttacctattgccaaacaccaattactttatagaagggttggcgctattggccaacacgaatgtactaacctatttctttcattcttttccatttcggttgtcttcatttcatgctttgtgttgcttatggctttgttggcttcatttccgatttggttgatttcttgattgacaccttgattgaatggttcaaaccactaaaggaccttctaaggcgcgtctctgaaatgcggtggctatgtagaatctaatacgaaattaactaattataccgagggatacgttgcgatatcgctgtatgctaccggctatgtgccgcatgctacatttatggttatgtctcggaacagtgcagataagttaagaacggtatccggcaaggctccatggcac…	>FBtr0335417 type=three_prime_UTR; loc=3R:19767647..19771279;MD5=ffa8ba3f47b882fe30c03162ef90ad2c; length=3633; parent=FBgn0024963; release=r6.38; species=Dmel;	c(744, 2484, 3108)	-1	809	-1	FBgn0024963	4	3	0	1	0	GluClalpha
FBtr0335418	atgccgttacctattgccaaacaccaattactttatagaagggttggcgctattggccaacacgaatgtactaacctatttctttcattcttttccatttcggttgtcttcatttcatgctttgtgttgcttatggctttgttggcttcatttccgatttggttgatttcttgattgacaccttgattgaatggttcaaaccactaaaggaccttctaaggcgcgtctctgaaatgcggtggctatgtagaatctaatacgaaattaactaattataccgagggatacgttgcgatatcgctgtatgctaccggctatgtgccgcatgctacatttatggttatgtctcggaacagtgcagataagttaagaacggtatccggcaaggctccatggcac…	>FBtr0335418 type=three_prime_UTR; loc=3R:19767647..19771279;MD5=ffa8ba3f47b882fe30c03162ef90ad2c; length=3633; parent=FBgn0024963; release=r6.38; species=Dmel;	c(744, 2484, 3108)	-1	809	-1	FBgn0024963	4	3	0	1	0	GluClalpha
FBtr0335421	atgccgttacctattgccaaacaccaattactttatagaagggttggcgctattggccaacacgaatgtactaacctatttctttcattcttttccatttcggttgtcttcatttcatgctttgtgttgcttatggctttgttggcttcatttccgatttggttgatttcttgattgacaccttgattgaatggttcaaaccactaaaggaccttctaaggcgcgtctctgaaatgcggtggctatgtagaatctaatacgaaattaactaattataccgagggatacgttgcgatatcgctgtatgctaccggctatgtgccgcatgctacatttatggttatgtctcggaacagtgcagataagttaagaacggtatccggcaaggctccatggcac…	>FBtr0335421 type=three_prime_UTR; loc=3R:19767647..19771279;MD5=ffa8ba3f47b882fe30c03162ef90ad2c; length=3633; parent=FBgn0024963; release=r6.38; species=Dmel;	c(744, 2484, 3108)	-1	809	-1	FBgn0024963	4	3	0	1	0	GluClalpha
FBtr0343789	atgccgttacctattgccaaacaccaattactttatagaagggttggcgctattggccaacacgaatgtactaacctatttctttcattcttttccatttcggttgtcttcatttcatgctttgtgttgcttatggctttgttggcttcatttccgatttggttgatttcttgattgacaccttgattgaatggttcaaaccactaaaggaccttctaaggcgcgtctctgaaatgcggtggctatgtagaatctaatacgaaattaactaattataccgagggatacgttgcgatatcgctgtatgctaccggctatgtgccgcatgctacatttatggttatgtctcggaacagtgcagataagttaagaacggtatccggcaaggctccatggcac…	>FBtr0343789 type=three_prime_UTR; loc=3R:19767647..19771279;MD5=ffa8ba3f47b882fe30c03162ef90ad2c; length=3633; parent=FBgn0024963; release=r6.38; species=Dmel;	c(744, 2484, 3108)	-1	809	-1	FBgn0024963	4	3	0	1	0	GluClalpha
FBtr0333756	acgcgtggcagtctgcgaaacaaaattgaattgaaacaccatccagcatccaactcacgcccatccaagcatccctccatcaacaaaccagcatccttgacaaaatctcagtaacgaccaaaccatggaaactgaaaacaaaactactctcgcagtccaatttgaaacgcaaatatgccaaggcaaatggatttccggtggcgtaacttcgttgcagaataagtgtatatcaagtatacgccaaacacagacaccccttaattatgaaccgatccttgatatcaattctctcattgctgtgacagtcaaacgtaatcgttatacaataatcgttatatgagaaggaccgaattacggactactacgggacaattagttagatagatacgtaaatgacaa…	>FBtr0333756 type=three_prime_UTR; loc=X:12679241..12682560;MD5=f9e8d1ec9fd47a69915d8011b2b5f026; length=3320; parent=FBgn0011837; release=r6.38; species=Dmel;	-1	1053	-1	c(779, 799, 846)	FBgn0011837	4	0	1	0	3	Tis11
FBtr0333612	aatcaataaatcgttcgagttaatcaataagcatttggaaaatgcagccaaagggggtctagaaaaacgggggaatagtttaggtacatcatcatatttcatagctgaaagtatatcaaaaatccaataataataattaacaaacaaaactgcttcaaacttggctcatttcacagctataggaatttgtaaaattattaaaataaaatcgaaaacctaaagaaaaagaagaagtattttgcagaacaataaaatgctcattgtatgtatagaacttatgaaattcgaagcttaagataaattaacgatcatatgaaaatcgtatgaaaatcgaattgtacaatacacgtatgttagagttaaaaaagacttgagatgaattgcttgtcacaaaattat…	>FBtr0333612 type=three_prime_UTR; loc=3L:5439593..5442399;MD5=d6874832d795f39b4da2c04a7f112cb4; length=2807; parent=FBgn0085420; release=r6.38; species=Dmel;	c(2068, 2116, 2146)	1368	-1	-1	FBgn0085420	4	3	1	0	0	DIP-delta
FBtr0333815	tcccagtttcttagcgttcgtgaatgtatatgtctatatgtctatgtgtgtaccggaaatggtacttaaacaacctaataactaaatccgaatgtctcgaaaacccgatgggggagggatcatctctcccgtgtcataaaacaatccattaaaatggttaagatgatcgattgtttggtcgaactattaatgtatgatttgaatttgtcttgcactttatgtggttttcggtatttgtgtgtctctgagtgtaagatcttagctttattatgatcgcgcgatgtcacccccaattgaatttccagttgaattatacaccatacgatttatggcactcctctgtttccgcaagcaaaaccgattattattttcatgtttttaaaaatcctactaaattta…	>FBtr0333815 type=three_prime_UTR; loc=2R:join(24907307..24908721,24908776..24910910,24910964..24911291,24911353..24911453,24911999..24912173,24912253..24912549,24912827..24912981,24913676..24913809,24913873..24914542,24914650..24915009,24915114..24915222,24915281..24915462,24916772..24916890,24917320..24917577,24917648..24920265);MD5=7cc1510c6f3a6bbc412dc5275812d084; length=9056; parent=FBgn0085…	936	c(7730, 7957, 8974)	-1	-1	FBgn0085434	4	1	3	0	0	NaCP60E
FBtr0112707	aaataccatataaataatcaagaaataacaaaacagtccagccaaccactcaaccactcaagccaacaatttaacccacccaaaagaaaatatatgaaagaacaaacgcattgaggcattccagttcgaaactggatgagaacatgataagaataatctcaataatctataaaaaacaagaaataaatgaaatatgaagatatacgaaatcgaaattgaatcgacatcgaaacggaatgataactgtaacttgtaacggcaactgtactgattaatgtttactgatttactcaagcgctactgttgagcctaggattagctttgttttagtcaaacccaccacccagaacccccacccacttttcccatgttcgaatcgagctagtgacgaagcagtta…	>FBtr0112707 type=three_prime_UTR; loc=X:6583352..6585638;MD5=96f137a1bf023d995d27018f4b296a9d; length=2287; parent=FBgn0085446; release=r6.38; species=Dmel;	c(1612, 1733)	c(1069, 1405)	-1	-1	FBgn0085446	4	2	2	0	0	CG34417
FBtr0303206	aaataccatataaataatcaagaaataacaaaacagtccagccaaccactcaaccactcaagccaacaatttaacccacccaaaagaaaatatatgaaagaacaaacgcattgaggcattccagttcgaaactggatgagaacatgataagaataatctcaataatctataaaaaacaagaaataaatgaaatatgaagatatacgaaatcgaaattgaatcgacatcgaaacggaatgataactgtaacttgtaacggcaactgtactgattaatgtttactgatttactcaagcgctactgttgagcctaggattagctttgttttagtcaaacccaccacccagaacccccacccacttttcccatgttcgaatcgagctagtgacgaagcagtta…	>FBtr0303206 type=three_prime_UTR; loc=X:6583352..6585638;MD5=96f137a1bf023d995d27018f4b296a9d; length=2287; parent=FBgn0085446; release=r6.38; species=Dmel;	c(1612, 1733)	c(1069, 1405)	-1	-1	FBgn0085446	4	2	2	0	0	CG34417
FBtr0345068	aaataccatataaataatcaagaaataacaaaacagtccagccaaccactcaaccactcaagccaacaatttaacccacccaaaagaaaatatatgaaagaacaaacgcattgaggcattccagttcgaaactggatgagaacatgataagaataatctcaataatctataaaaaacaagaaataaatgaaatatgaagatatacgaaatcgaaattgaatcgacatcgaaacggaatgataactgtaacttgtaacggcaactgtactgattaatgtttactgatttactcaagcgctactgttgagcctaggattagctttgttttagtcaaacccaccacccagaacccccacccacttttcccatgttcgaatcgagctagtgacgaagcagtta…	>FBtr0345068 type=three_prime_UTR; loc=X:6583352..6585638;MD5=96f137a1bf023d995d27018f4b296a9d; length=2287; parent=FBgn0085446; release=r6.38; species=Dmel;	c(1612, 1733)	c(1069, 1405)	-1	-1	FBgn0085446	4	2	2	0	0	CG34417
FBtr0345992	cctcctccgcctccgcctcctccgtcacctactcccccctcacccccgcatccgccgacatgactaataccccatctagctgtacgatacgttacgatttggcgtgtgtgcctgtgcgcgtgctagagtgtatgagtgccttaaccgtagttgtactatatcctactataacatactatatttaatgtttttcgattgttcgctcaagccgctgctgtaataaaccaattgcaaacgtacatatgtacatacatatgtacatatatgattttacattcacttacgcacgaaaaatattcataaagtagatgggcgattagataccgttattttcggtagaagatattcaacaccttccatgcagttccacaattcatcgctcttgagaaacatcacacc…	>FBtr0345992 type=three_prime_UTR; loc=X:complement(19689697..19690831);MD5=6c4a0292eb11e76ecc2742e904f6b408; length=1135; parent=FBgn0086384; release=r6.38; species=Dmel;	-1	c(244, 256, 1099, 1107)	-1	-1	FBgn0086384	4	0	4	0	0	Mer
FBtr0307047	gaagcagccgcaacagcagcggcatcagtagtcatgaacgccaacaaggaggcggcaaagcagcgcaaacgtaaaacactcaagatggcactggagaagtgcatgcagcgacgggacgcaatggtggcggagaccaccacgggggcaggaggagatggggcagaggcaggaggggagtcgggcgaggcagtcgacggggcaggatcggaagagggagccggttcagagggcactgaaccgctcacctacgagcagcagcagcagcgaatgcaccaggagctgacgcagcagatcagggcggccatggcggcggaacaggccgccgaggcgatggattcgaccatgaacaccacggtcaacaccaccacgacgaccacaaccacaacgaacaccactggc…	>FBtr0307047 type=three_prime_UTR; loc=2L:1696150..1704682;MD5=e2b4c12991cb172211c16a7f3499f9d0; length=8533; parent=FBgn0086758; release=r6.38; species=Dmel;	c(2707, 4258)	c(1830, 5193)	-1	-1	FBgn0086758	4	2	2	0	0	chinmo
FBtr0305060	acagtgccctcgcaaagccacagatacacacatcttgggatgcagatgaggcaaaaggattttacacgtactacttacccaaagcgataatggaaaaccaaccaacagcaagatgttaccaaaagcactgtctactattttgtatactaccgatgccgataccaataccaactatgcagtatttctacgactctcacacacactatgtacactctttacacacacagataaacacagggacacacacacacatttgtaaatgacaccatgtaaatgcaatgcgaaatgcatattatttgatatttatgtgtattgtgtaattaggttgccgctatactcaaattgtggatgcatttaaaagtcagctcgtatagcgtactttgtaaactctcttaactt…	>FBtr0305060 type=three_prime_UTR; loc=2R:9537175..9541565;MD5=ca0bb2007f269fac8c3b22d7a9dcb0d8; length=4391; parent=FBgn0259246; release=r6.38; species=Dmel;	-1	c(838, 1951, 2131, 3152)	-1	-1	FBgn0259246	4	0	4	0	0	brp
FBtr0299915	acagtgccctcgcaaagccacagatacacacatcttgggatgcagatgaggcaaaaggattttacacgtactacttacccaaagcgataatggaaaaccaaccaacagcaagatgttaccaaaagcactgtctactattttgtatactaccgatgccgataccaataccaactatgcagtatttctacgactctcacacacactatgtacactctttacacacacagataaacacagggacacacacacacatttgtaaatgacaccatgtaaatgcaatgcgaaatgcatattatttgatatttatgtgtattgtgtaattaggttgccgctatactcaaattgtggatgcatttaaaagtcagctcgtatagcgtactttgtaaactctcttaactt…	>FBtr0299915 type=three_prime_UTR; loc=2R:9537175..9540447;MD5=24b4078c4f62d0f50f868741a0388e8f; length=3273; parent=FBgn0259246; release=r6.38; species=Dmel;	-1	c(838, 1951, 2131, 3152)	-1	-1	FBgn0259246	4	0	4	0	0	brp
FBtr0300245	acagtgccctcgcaaagccacagatacacacatcttgggatgcagatgaggcaaaaggattttacacgtactacttacccaaagcgataatggaaaaccaaccaacagcaagatgttaccaaaagcactgtctactattttgtatactaccgatgccgataccaataccaactatgcagtatttctacgactctcacacacactatgtacactctttacacacacagataaacacagggacacacacacacatttgtaaatgacaccatgtaaatgcaatgcgaaatgcatattatttgatatttatgtgtattgtgtaattaggttgccgctatactcaaattgtggatgcatttaaaagtcagctcgtatagcgtactttgtaaactctcttaactt…	>FBtr0300245 type=three_prime_UTR; loc=2R:9537175..9540447;MD5=24b4078c4f62d0f50f868741a0388e8f; length=3273; parent=FBgn0259246; release=r6.38; species=Dmel;	-1	c(838, 1951, 2131, 3152)	-1	-1	FBgn0259246	4	0	4	0	0	brp
FBtr0336693	acagtgccctcgcaaagccacagatacacacatcttgggatgcagatgaggcaaaaggattttacacgtactacttacccaaagcgataatggaaaaccaaccaacagcaagatgttaccaaaagcactgtctactattttgtatactaccgatgccgataccaataccaactatgcagtatttctacgactctcacacacactatgtacactctttacacacacagataaacacagggacacacacacacatttgtaaatgacaccatgtaaatgcaatgcgaaatgcatattatttgatatttatgtgtattgtgtaattaggttgccgctatactcaaattgtggatgcatttaaaagtcagctcgtatagcgtactttgtaaactctcttaactt…	>FBtr0336693 type=three_prime_UTR; loc=2R:9537175..9541565;MD5=ca0bb2007f269fac8c3b22d7a9dcb0d8; length=4391; parent=FBgn0259246; release=r6.38; species=Dmel;	-1	c(838, 1951, 2131, 3152)	-1	-1	FBgn0259246	4	0	4	0	0	brp
FBtr0333602	acgaatcgacgatcatctcacaaaatgccgcagttccccgccaagtagagcaatcgctagacaagcttactacttattcaacattcagacatttaaatgaaaaacaaaacaaacaaaaaaaaaaccccccgataatcacaatatcacaataacagtaaatctcaaacaagaacgtaattttaacattgcaaatttctcctttctatgccaatcgaacaaaacaaaacaaaaaatcgaaaccaaaatggataatgtcgtgtaaataactgaaccgaacgaaaacaatatcaaatcaaatcaacattccacgaaactcaaatgcgattccgcttaggtcaagagcgttttatgcatctggagaagcagacccggatctaagtggagccattcagcggaagc…	>FBtr0333602 type=three_prime_UTR; loc=X:9024832..9029476;MD5=abe80b7af5d71a52dfb046a22fb23893; length=4645; parent=FBgn0261549; release=r6.38; species=Dmel;	c(258, 3581)	c(3229, 3815)	-1	-1	FBgn0261549	4	2	2	0	0	rdgA
FBtr0340192	cagccgcatagctgaaggattagagccaggacaattgcataactgtacgtagtagatatttgtagggtgggataaacagtgggaaatgcgccaggcaaaatgcgatacacgatacacgaaacgatagcgattaccacaaactataaagatatggtgcatactcttaggcgccgcacatggcatagcgtattcataatgtgttgtatacatctagtggttagttctgtgtttagctgcgattttcgtgaagctttgttgttgatctttaacgatgttgctgtctcttttgatacgtacatacatatttgaagcattacgggatatacatacaaagaaaacttgtaggaaatatgcctacaactcatctagtttaatctataatttaatgtgaaaggaaac…	>FBtr0340192 type=three_prime_UTR; loc=3R:complement(20378996..20381313);MD5=136ca7ba0c3dbc54d2f5ac82b0b86767; length=2318; parent=FBgn0262869; release=r6.38; species=Dmel;	1416	c(468, 1084, 1216)	-1	-1	FBgn0262869	4	1	3	0	0	Gfrl
FBtr0330033	aggattagagccaggacaattgcataactgtacgtagtagatatttgtagggtgggataaacagtgggaaatgcgccaggcaaaatgcgatacacgatacacgaaacgatagcgattaccacaaactataaagatatggtgcatactcttaggcgccgcacatggcatagcgtattcataatgtgttgtatacatctagtggttagttctgtgtttagctgcgattttcgtgaagctttgttgttgatctttaacgatgttgctgtctcttttgatacgtacatacatatttgaagcattacgggatatacatacaaagaaaacttgtaggaaatatgcctacaactcatctagtttaatctataatttaatgtgaaaggaaactgctgtctacataat…	>FBtr0330033 type=three_prime_UTR; loc=3R:complement(20378996..20381298);MD5=2bd9d27fc250438743832a23dc362ae5; length=2303; parent=FBgn0262869; release=r6.38; species=Dmel;	1401	c(453, 1069, 1201)	-1	-1	FBgn0262869	4	1	3	0	0	Gfrl
FBtr0346115	cagccgcatagctgaaggattagagccaggacaattgcataactgtacgtagtagatatttgtagggtgggataaacagtgggaaatgcgccaggcaaaatgcgatacacgatacacgaaacgatagcgattaccacaaactataaagatatggtgcatactcttaggcgccgcacatggcatagcgtattcataatgtgttgtatacatctagtggttagttctgtgtttagctgcgattttcgtgaagctttgttgttgatctttaacgatgttgctgtctcttttgatacgtacatacatatttgaagcattacgggatatacatacaaagaaaacttgtaggaaatatgcctacaactcatctagtttaatctataatttaatgtgaaaggaaac…	>FBtr0346115 type=three_prime_UTR; loc=3R:complement(20378458..20381313);MD5=be8131f17e5dfad17b54d44547ea5b8b; length=2856; parent=FBgn0262869; release=r6.38; species=Dmel;	1416	c(468, 1084, 1216)	-1	-1	FBgn0262869	4	1	3	0	0	Gfrl
FBtr0306199	cagccgcatagctgaaggattagagccaggacaattgcataactgtacgtagtagatatttgtagggtgggataaacagtgggaaatgcgccaggcaaaatgcgatacacgatacacgaaacgatagcgattaccacaaactataaagatatggtgcatactcttaggcgccgcacatggcatagcgtattcataatgtgttgtatacatctagtggttagttctgtgtttagctgcgattttcgtgaagctttgttgttgatctttaacgatgttgctgtctcttttgatacgtacatacatatttgaagcattacgggatatacatacaaagaaaacttgtaggaaatatgcctacaactcatctagtttaatctataatttaatgtgaaaggaaac…	>FBtr0306199 type=three_prime_UTR; loc=3R:complement(20378996..20381313);MD5=136ca7ba0c3dbc54d2f5ac82b0b86767; length=2318; parent=FBgn0262869; release=r6.38; species=Dmel;	1416	c(468, 1084, 1216)	-1	-1	FBgn0262869	4	1	3	0	0	Gfrl
FBtr0306200	cagccgcatagctgaaggattagagccaggacaattgcataactgtacgtagtagatatttgtagggtgggataaacagtgggaaatgcgccaggcaaaatgcgatacacgatacacgaaacgatagcgattaccacaaactataaagatatggtgcatactcttaggcgccgcacatggcatagcgtattcataatgtgttgtatacatctagtggttagttctgtgtttagctgcgattttcgtgaagctttgttgttgatctttaacgatgttgctgtctcttttgatacgtacatacatatttgaagcattacgggatatacatacaaagaaaacttgtaggaaatatgcctacaactcatctagtttaatctataatttaatgtgaaaggaaac…	>FBtr0306200 type=three_prime_UTR; loc=3R:complement(20378996..20381313);MD5=136ca7ba0c3dbc54d2f5ac82b0b86767; length=2318; parent=FBgn0262869; release=r6.38; species=Dmel;	1416	c(468, 1084, 1216)	-1	-1	FBgn0262869	4	1	3	0	0	Gfrl
FBtr0306201	cagccgcatagctgaaggattagagccaggacaattgcataactgtacgtagtagatatttgtagggtgggataaacagtgggaaatgcgccaggcaaaatgcgatacacgatacacgaaacgatagcgattaccacaaactataaagatatggtgcatactcttaggcgccgcacatggcatagcgtattcataatgtgttgtatacatctagtggttagttctgtgtttagctgcgattttcgtgaagctttgttgttgatctttaacgatgttgctgtctcttttgatacgtacatacatatttgaagcattacgggatatacatacaaagaaaacttgtaggaaatatgcctacaactcatctagtttaatctataatttaatgtgaaaggaaac…	>FBtr0306201 type=three_prime_UTR; loc=3R:complement(20378996..20381313);MD5=136ca7ba0c3dbc54d2f5ac82b0b86767; length=2318; parent=FBgn0262869; release=r6.38; species=Dmel;	1416	c(468, 1084, 1216)	-1	-1	FBgn0262869	4	1	3	0	0	Gfrl
FBtr0306202	cagccgcatagctgaaggattagagccaggacaattgcataactgtacgtagtagatatttgtagggtgggataaacagtgggaaatgcgccaggcaaaatgcgatacacgatacacgaaacgatagcgattaccacaaactataaagatatggtgcatactcttaggcgccgcacatggcatagcgtattcataatgtgttgtatacatctagtggttagttctgtgtttagctgcgattttcgtgaagctttgttgttgatctttaacgatgttgctgtctcttttgatacgtacatacatatttgaagcattacgggatatacatacaaagaaaacttgtaggaaatatgcctacaactcatctagtttaatctataatttaatgtgaaaggaaac…	>FBtr0306202 type=three_prime_UTR; loc=3R:complement(20378996..20381313);MD5=136ca7ba0c3dbc54d2f5ac82b0b86767; length=2318; parent=FBgn0262869; release=r6.38; species=Dmel;	1416	c(468, 1084, 1216)	-1	-1	FBgn0262869	4	1	3	0	0	Gfrl
FBtr0306203	cagccgcatagctgaaggattagagccaggacaattgcataactgtacgtagtagatatttgtagggtgggataaacagtgggaaatgcgccaggcaaaatgcgatacacgatacacgaaacgatagcgattaccacaaactataaagatatggtgcatactcttaggcgccgcacatggcatagcgtattcataatgtgttgtatacatctagtggttagttctgtgtttagctgcgattttcgtgaagctttgttgttgatctttaacgatgttgctgtctcttttgatacgtacatacatatttgaagcattacgggatatacatacaaagaaaacttgtaggaaatatgcctacaactcatctagtttaatctataatttaatgtgaaaggaaac…	>FBtr0306203 type=three_prime_UTR; loc=3R:complement(20378996..20381313);MD5=136ca7ba0c3dbc54d2f5ac82b0b86767; length=2318; parent=FBgn0262869; release=r6.38; species=Dmel;	1416	c(468, 1084, 1216)	-1	-1	FBgn0262869	4	1	3	0	0	Gfrl
FBtr0306204	cagccgcatagctgaaggattagagccaggacaattgcataactgtacgtagtagatatttgtagggtgggataaacagtgggaaatgcgccaggcaaaatgcgatacacgatacacgaaacgatagcgattaccacaaactataaagatatggtgcatactcttaggcgccgcacatggcatagcgtattcataatgtgttgtatacatctagtggttagttctgtgtttagctgcgattttcgtgaagctttgttgttgatctttaacgatgttgctgtctcttttgatacgtacatacatatttgaagcattacgggatatacatacaaagaaaacttgtaggaaatatgcctacaactcatctagtttaatctataatttaatgtgaaaggaaac…	>FBtr0306204 type=three_prime_UTR; loc=3R:complement(20378996..20381313);MD5=136ca7ba0c3dbc54d2f5ac82b0b86767; length=2318; parent=FBgn0262869; release=r6.38; species=Dmel;	1416	c(468, 1084, 1216)	-1	-1	FBgn0262869	4	1	3	0	0	Gfrl
FBtr0330661	gggcggcctcgctccacccgcgacagccggtaatcgcgggggagcgacaataatgccatcatttcgtcgaggcggctgatactgcagaagaacttggctaaggcgaacctggcgcagcagcgggcggcagcggtgattgccgccggtcgggggggcttgggcggtggtcaccaggatgccctggcgccacccaatatccccggagtggagactaagaccggccgcctgctgctccgccagcagctgcacctcaatctcaatctgaatgtgcaggaaacgttgcgcgatggcgtcgatatcgatgatgtggacgaggatgtcgacgaggacgaggacctagacctagacctagaaaccgtcacaacagtgcctcttaacaatgaacaacttaatgctaag…	>FBtr0330661 type=three_prime_UTR; loc=2L:20441858..20447905;MD5=c2a87dd38c1220da577cf53f31d8e8ca; length=6048; parent=FBgn0263355; release=r6.38; species=Dmel;	c(4141, 5540)	-1	4456	5337	FBgn0263355	4	2	0	1	1	CG31688
FBtr0084169	gagcagccgatggccgcgaatccagcgttcgcctggccaccgctggccgcccactactacagcttctaggcggagggagggggaacaccaaattaagccacgttttttgatagtaccatacaaatcactaaatagaattatatatatatatatatatatatatatacatatataataatttatgccagccagctgaccgatgtgcgtggtaaatgtgcgctagctcttagttaaatgtgtaatcaactgcataggggaaaaacaaaaccacaggaaatcataaacaacaacaaacaaacaaaaaaaacaaaaataacaagaaccgcaagcaaagaaacatacatttgtgccccggagtgtacgatgtatatttttgtttcgttttgacaatcgacaaat…	>FBtr0084169 type=three_prime_UTR; loc=3R:22006505..22014539;MD5=810604c938a3a8fa26a9265a86c6a257; length=8035; parent=FBgn0264490; release=r6.38; species=Dmel;	-1	c(4134, 6981)	-1	c(2901, 7337)	FBgn0264490	4	0	2	0	2	Eip93F
FBtr0330384	gcggagggagggggaacaccaaattaagccacgttttttgatagtaccatacaaatcactaaatagaattatatatatatatatatatatatatatacatatataataatttatgccagccagctgaccgatgtgcgtggtaaatgtgcgctagctcttagttaaatgtgtaatcaactgcataggggaaaaacaaaaccacaggaaatcataaacaacaacaaacaaacaaaaaaaacaaaaataacaagaaccgcaagcaaagaaacatacatttgtgccccggagtgtacgatgtatatttttgtttcgttttgacaatcgacaaataggcattctcttgtacaaactttcttaaaagctaacaacaaaacaaatctaaaaccttaagaccaaaaa…	>FBtr0330384 type=three_prime_UTR; loc=3R:22006574..22014539;MD5=32ccb4ca36408f3441608dde5d58f62a; length=7966; parent=FBgn0264490; release=r6.38; species=Dmel;	-1	c(4065, 6912)	-1	c(2832, 7268)	FBgn0264490	4	0	2	0	2	Eip93F
FBtr0333526	tttgacttctggctgcagtcagaccccgctaacagccccttgccgcacaatctttgaatctcgacgagcttactcaactatgttaccactgaactacccagaaacctctgctctatatctctaaatatttagctcaatcgccgttttgctctgcttttgtgtcagctttggccaagttttccatcactcacaatcaaaactttgtagtgtagtggcagcctgtctttggaagattggggattgactttgccaggatatcagaatcaggaaccgaacagtgagattaaaacgagtgacacccgaataagatactagaaacaacatttaagaacctatcacctggatatgagccattttaaaaatccgctgtgtttcacagatttcttttccaatttgcat…	>FBtr0333526 type=three_prime_UTR; loc=X:complement(2376013..2378129);MD5=d37c224a086d00b65b14705dad0e7f36; length=2117; parent=FBgn0264598; release=r6.38; species=Dmel;	726	572	-1	c(629, 1365)	FBgn0264598	4	1	1	0	2	PsGEF
FBtr0333528	tttgacttctggctgcagtcagaccccgctaacagccccttgccgcacaatctttgaatctcgacgagcttactcaactatgttaccactgaactacccagaaacctctgctctatatctctaaatatttagctcaatcgccgttttgctctgcttttgtgtcagctttggccaagttttccatcactcacaatcaaaactttgtagtgtagtggcagcctgtctttggaagattggggattgactttgccaggatatcagaatcaggaaccgaacagtgagattaaaacgagtgacacccgaataagatactagaaacaacatttaagaacctatcacctggatatgagccattttaaaaatccgctgtgtttcacagatttcttttccaatttgcat…	>FBtr0333528 type=three_prime_UTR; loc=X:complement(2376013..2378129);MD5=d37c224a086d00b65b14705dad0e7f36; length=2117; parent=FBgn0264598; release=r6.38; species=Dmel;	726	572	-1	c(629, 1365)	FBgn0264598	4	1	1	0	2	PsGEF
FBtr0334137	ggggacaattgcgccacctggcggccagcggccaactgaatcggaaaactaatgcggaaaaacggaacacaagaggaaactttgatggctacactgagagaaaccgaggaacgaacgaagctgcaagaatattgtttactaagcttagaatcagcctagaattattgataacaaaacgcttcaaatgcgctctctatgtgaattgtggtagagttagaataaacgtacatcatctatacgcataggtacattaatatcgatatatatgtataaatactgtttactttgttgttgcaaaaggaagaagcaaattgataaatatgaaaatattagggccaagcacaaatacaaacgaacagtggagaaaaaaagaacgcgtagatgtaaatagcaaaggag…	>FBtr0334137 type=three_prime_UTR; loc=2L:complement(11814156..11816557);MD5=1a1c27b2ca0ce932a9ac83ba89cb9697; length=2402; parent=FBgn0264815; release=r6.38; species=Dmel;	c(383, 1990, 2116)	-1	-1	758	FBgn0264815	4	3	0	0	1	Pde1c
FBtr0334140	ggggacaattgcgccacctggcggccagcggccaactgaatcggaaaactaatgcggaaaaacggaacacaagaggaaactttgatggctacactgagagaaaccgaggaacgaacgaagctgcaagaatattgtttactaagcttagaatcagcctagaattattgataacaaaacgcttcaaatgcgctctctatgtgaattgtggtagagttagaataaacgtacatcatctatacgcataggtacattaatatcgatatatatgtataaatactgtttactttgttgttgcaaaaggaagaagcaaattgataaatatgaaaatattagggccaagcacaaatacaaacgaacagtggagaaaaaaagaacgcgtagatgtaaatagcaaaggag…	>FBtr0334140 type=three_prime_UTR; loc=2L:complement(11814156..11816557);MD5=1a1c27b2ca0ce932a9ac83ba89cb9697; length=2402; parent=FBgn0264815; release=r6.38; species=Dmel;	c(383, 1990, 2116)	-1	-1	758	FBgn0264815	4	3	0	0	1	Pde1c
FBtr0299551	gatacggccaatggggggagtgaatacgttggtggtgccatggaggccatggacggtttcggctatgatagcggcgagatctcctgcacctacatggacccaatcgatcagacatgagacctggcctacggtgaggtgtgtggtccccccgagggggcccgttaaggacccttttcacgacctggtggctcagctgagtgcctggatagcataacctagaaatttctatggattcgaaaccattttaaaaggttcctaagagtatgccataaaaagtttaaagctgtttcgtttttgaaacatgttgtagcatacttttggacacttttatacgagtctagggttttctgtgaatcaaacttaaaagagaataaccttaaatcaaaatttgaagccttt…	>FBtr0299551 type=three_prime_UTR; loc=3L:complement(7159199..7162427);MD5=3f8d9d1c67cdef8541700eb2728cf260; length=3229; parent=FBgn0265296; release=r6.38; species=Dmel;	2065	1562	2320	1974	FBgn0265296	4	1	1	1	1	Dscam2
FBtr0339133	gacattggtaagatctgatcgcaagatcagcagattggatgagaccgggccccccgatagccacaaatttagcagcagccgggccgtttttgtacatttttgtaatgcatttgttaccttaccaagacgccccccccccccctaaaccccctaaaaaccattacaccactcttgaaatgataaacctcaattccaaactttcggaacagccccgcaccaagtaatacccttctctctccccaaaagaaacaaccagatgaacactcagtaaactttcggacaatcagtatcaaaattctgcaccaaccatccaaaaaccaaaacataccgaatcgaaacacttcccattatgaactcctgcccgtatttatagaggtcatactatatctaagtattaac…	>FBtr0339133 type=three_prime_UTR; loc=3L:complement(7159199..7161356);MD5=01e1a4e6a046e6ceecf40e7079f34682; length=2158; parent=FBgn0265296; release=r6.38; species=Dmel;	994	491	1249	903	FBgn0265296	4	1	1	1	1	Dscam2
FBtr0339703	catttaaggatggcccgccaatcagcaacaacaacaacgacggtagagagcacgaggagcaggaggagcagcagcagcagcagcagctgcagcaggaggagcagcagcaacatcggcgcaaagaggatgcgttgcagcaactggacatcggccaacatattaaccgcagccgcagcgtcgctgatgacacaacaaggacaccgaggaggcgcgttgcaatcagacaaaggggcggtggtgctgctggtgttttttcgctacgcccacccacgtccacgcccacacccgcacccacaaccacccaccatcgcccacacatccgcatccggttcgcattccgttgcactcgtttggttcttaaagcaaggtgaatgcgttcttttttaaactgctgcagtc…	>FBtr0339703 type=three_prime_UTR; loc=X:13523445..13527282;MD5=ce1cce7c1fcee8e1364e8078abec939d; length=3838; parent=FBgn0265416; release=r6.38; species=Dmel;	2231	c(508, 596, 3123)	-1	-1	FBgn0265416	4	1	3	0	0	Neto
FBtr0344096	ttaagacccccctacgatccttatgacgaggatccgctggccaatcagctcagcgacatcgacatcgggcccgccaccgatgcgcatccggatgcggatgccgccggcgattccgccggcagcaatctgtccaccctgctgaccgccacgacgacgagcgcctcgctgtcggcgctcgacgaactggacaaccggctgcaggccctggacctgatcacctcctccacggccaccaccctcagcaaggtcgccggcaagctgtgcaactacagcagcaagcgccgactccaccagtcggaggccgtgctcgcccagaagtcgcgcatcctccagcactaggggattcacccaaggggtgtcctccttcgtgtgtcaagcgtgtgtttcccgggcgggcag…	>FBtr0344096 type=three_prime_UTR; loc=X:complement(16969069..16973034);MD5=57643934b1158b7e5be2da0403c8f576; length=3966; parent=FBgn0266354; release=r6.38; species=Dmel;	3593	2484	-1	c(1943, 2476)	FBgn0266354	4	1	1	0	2	CG45002
FBtr0344097	ttaagacccccctacgatccttatgacgaggatccgctggccaatcagctcagcgacatcgacatcgggcccgccaccgatgcgcatccggatgcggatgccgccggcgattccgccggcagcaatctgtccaccctgctgaccgccacgacgacgagcgcctcgctgtcggcgctcgacgaactggacaaccggctgcaggccctggacctgatcacctcctccacggccaccaccctcagcaaggtcgccggcaagctgtgcaactacagcagcaagcgccgactccaccagtcggaggccgtgctcgcccagaagtcgcgcatcctccagcactaggggattcacccaaggggtgtcctccttcgtgtgtcaagcgtgtgtttcccgggcgggcag…	>FBtr0344097 type=three_prime_UTR; loc=X:complement(16969069..16973034);MD5=57643934b1158b7e5be2da0403c8f576; length=3966; parent=FBgn0266354; release=r6.38; species=Dmel;	3593	2484	-1	c(1943, 2476)	FBgn0266354	4	1	1	0	2	CG45002
FBtr0344098	gggattcacccaaggggtgtcctccttcgtgtgtcaagcgtgtgtttcccgggcgggcagatctctcctcatttcactttcgacaccagtttgcggaaggtctttacatcttgatgatgtttacaagtcaaatacataatgttgatcattttaaattaattcaattttaattttaacacaaaacatttgaaagctgtgacagtaaaaataggctttacacaatgtctttattaattttctgtaaaaccaaccgttgtctttttcaactttacattcacaatccgttacttaacattaacatttttaagcatttgtttttacatttcctacttgaagttggctgcgataagcacagttaatcattgtttagcgcttacaaacacttatacgttatatgta…	>FBtr0344098 type=three_prime_UTR; loc=X:complement(16969069..16972695);MD5=6d215a750598205aaea72d0039cdd5a4; length=3627; parent=FBgn0266354; release=r6.38; species=Dmel;	3254	2145	-1	c(1604, 2137)	FBgn0266354	4	1	1	0	2	CG45002
FBtr0344099	ttaagacccccctacgatccttatgacgaggatccgctggccaatcagctcagcgacatcgacatcgggcccgccaccgatgcgcatccggatgcggatgccgccggcgattccgccggcagcaatctgtccaccctgctgaccgccacgacgacgagcgcctcgctgtcggcgctcgacgaactggacaaccggctgcaggccctggacctgatcacctcctccacggccaccaccctcagcaaggtcgccggcaagctgtgcaactacagcagcaagcgccgactccaccagtcggaggccgtgctcgcccagaagtcgcgcatcctccagcactaggggattcacccaaggggtgtcctccttcgtgtgtcaagcgtgtgtttcccgggcgggcag…	>FBtr0344099 type=three_prime_UTR; loc=X:complement(16969069..16973034);MD5=57643934b1158b7e5be2da0403c8f576; length=3966; parent=FBgn0266354; release=r6.38; species=Dmel;	3593	2484	-1	c(1943, 2476)	FBgn0266354	4	1	1	0	2	CG45002
FBtr0344100	gggattcacccaaggggtgtcctccttcgtgtgtcaagcgtgtgtttcccgggcgggcagatctctcctcatttcactttcgacaccagtttgcggaaggtctttacatcttgatgatgtttacaagtcaaatacataatgttgatcattttaaattaattcaattttaattttaacacaaaacatttgaaagctgtgacagtaaaaataggctttacacaatgtctttattaattttctgtaaaaccaaccgttgtctttttcaactttacattcacaatccgttacttaacattaacatttttaagcatttgtttttacatttcctacttgaagttggctgcgataagcacagttaatcattgtttagcgcttacaaacacttatacgttatatgta…	>FBtr0344100 type=three_prime_UTR; loc=X:complement(16969069..16972695);MD5=6d215a750598205aaea72d0039cdd5a4; length=3627; parent=FBgn0266354; release=r6.38; species=Dmel;	3254	2145	-1	c(1604, 2137)	FBgn0266354	4	1	1	0	2	CG45002
FBtr0344101	ttaagacccccctacgatccttatgacgaggatccgctggccaatcagctcagcgacatcgacatcgggcccgccaccgatgcgcatccggatgcggatgccgccggcgattccgccggcagcaatctgtccaccctgctgaccgccacgacgacgagcgcctcgctgtcggcgctcgacgaactggacaaccggctgcaggccctggacctgatcacctcctccacggccaccaccctcagcaaggtcgccggcaagctgtgcaactacagcagcaagcgccgactccaccagtcggaggccgtgctcgcccagaagtcgcgcatcctccagcactaggggattcacccaaggggtgtcctccttcgtgtgtcaagcgtgtgtttcccgggcgggcag…	>FBtr0344101 type=three_prime_UTR; loc=X:complement(16969069..16973034);MD5=57643934b1158b7e5be2da0403c8f576; length=3966; parent=FBgn0266354; release=r6.38; species=Dmel;	3593	2484	-1	c(1943, 2476)	FBgn0266354	4	1	1	0	2	CG45002
FBtr0344102	ttaagacccccctacgatccttatgacgaggatccgctggccaatcagctcagcgacatcgacatcgggcccgccaccgatgcgcatccggatgcggatgccgccggcgattccgccggcagcaatctgtccaccctgctgaccgccacgacgacgagcgcctcgctgtcggcgctcgacgaactggacaaccggctgcaggccctggacctgatcacctcctccacggccaccaccctcagcaaggtcgccggcaagctgtgcaactacagcagcaagcgccgactccaccagtcggaggccgtgctcgcccagaagtcgcgcatcctccagcactaggggattcacccaaggggtgtcctccttcgtgtgtcaagcgtgtgtttcccgggcgggcag…	>FBtr0344102 type=three_prime_UTR; loc=X:complement(16969069..16973034);MD5=57643934b1158b7e5be2da0403c8f576; length=3966; parent=FBgn0266354; release=r6.38; species=Dmel;	3593	2484	-1	c(1943, 2476)	FBgn0266354	4	1	1	0	2	CG45002
FBtr0346129	cttcgtaggaaacccgtaaaaaccagccactaaaacgcgaggagcgcagtgaaaaccgaagaacaggagacataattatttatatttatacatatatatatataaacatatatatatatatatagtacataaatctatgttatcgaaccagttttttgatgtcaaggaacattatatatatatatatacacgtatacataaaatatttttttttattgttagccactagagaaaagtaaagaaagaaaattaatgaaaataaagaaagcgacatgccaacataatcccatgtagctgcatgtacgtttatatatgtgtgtgtgtgtgacgtcagctaagccgcagatacatttacagtacagatacagattacagatacagccgcgtatatagacgaag…	>FBtr0346129 type=three_prime_UTR; loc=X:12331184..12335214;MD5=7418c527e30e1ca3a27793c0c191f216; length=4031; parent=FBgn0267001; release=r6.38; species=Dmel;	-1	c(760, 2840)	-1	c(463, 2207)	FBgn0267001	4	0	2	0	2	Ten-a
FBtr0310078	cttcgtaggaaacccgtaaaaaccagccactaaaacgcgaggagcgcagtgaaaaccgaagaacaggagacataattatttatatttatacatatatatatataaacatatatatatatatatagtacataaatctatgttatcgaaccagttttttgatgtcaaggaacattatatatatatatatacacgtatacataaaatatttttttttattgttagccactagagaaaagtaaagaaagaaaattaatgaaaataaagaaagcgacatgccaacataatcccatgtagctgcatgtacgtttatatatgtgtgtgtgtgtgacgtcagctaagccgcagatacatttacagtacagatacagattacagatacagccgcgtatatagacgaag…	>FBtr0310078 type=three_prime_UTR; loc=X:12331184..12335214;MD5=7418c527e30e1ca3a27793c0c191f216; length=4031; parent=FBgn0267001; release=r6.38; species=Dmel;	-1	c(760, 2840)	-1	c(463, 2207)	FBgn0267001	4	0	2	0	2	Ten-a
FBtr0346003	tgaaacgactttagtttgttattaaattattattattactactattactactataataataacaacaataacaacaacaacaacaacaaccacaataacaacgcaaactatttgcaacacaccaacaacaacatcaacaacaccaacaatttcaactacaacaacaattgatgaggacgatccaacaagaactttgacttacttaaggatgaaaatgaagaagaagatgcaggaggagaaggagagaccaacacaacaatacaccaatgcacacacacccacatatatgtatataccgttgaatccatgtatatacatatgtatatattttattaattatgtaaacgaggcatcaattctgaaagttttgggcaagcagaaactctagcaaataggaaa…	>FBtr0346003 type=three_prime_UTR; loc=X:complement(13858017..13869553);MD5=5fb60be398c7e2f1461ec931f57f8f41; length=11537; parent=FBgn0267033; release=r6.38; species=Dmel;	-1	7254	-1	c(288, 308, 320)	FBgn0267033	4	0	1	0	3	mamo
FBtr0347542	aacacataataactgcgactataaaccaacataaaataatcaccaaaaaaacacaccaacgcacctccccccgaacacacacactatatatacacacaaacttcaaaacaatcctacactgtaccgaaaacttgcaacacttgcaacacaaacgttgacgttggtttttcctaacctgcagcaaaagtttaagtgccatttggcgagtgagtgagtccgtcagccgacgagtaagtctgacagagacacggcctgtgtgtaaataataaataataaataataaaaaaaaagagaataaaaagagcatttaaagttattagtaaccatcgttgttgttgagttgttgttgttgttaccaactgtcgacatacccttgcaactgccggcgaaaacatagcg…	>FBtr0347542 type=three_prime_UTR; loc=2L:join(19611123..19611626,19644268..19644399,19644474..19644635,19691018..19691197,19701224..19701460,19701522..19701668,19701750..19702025,19702327..19702350,19714889..19714989,19715761..19715953,19717059..19717209,19717318..19717454,19725895..19726034,19726131..19729472,19729539..19729649,19729720..19730025,19730094..19731561);MD5=bdc76ee1697e8e037e1e7655…	258	-1	7307	c(7172, 7424)	FBgn0267964	4	1	0	1	2	CG46244
FBtr0073414	ggaggaatcaccgttaaaggagagccggcgccgcagcagcagcagcagaagcagcaaaagcagcagcagcagcaacatcagcagcagcagcagcagcagcagcgaaagcgccaaaaatagccaaggcagggttttctactgttgatactacctccacagcacacccataagattcaataccccaagacccaaaagcacccaccacaatttacaaccctatataactacaagctaaccgtaggcgccacctttgtgctggcacaggcgacggcaaaagtaagcaagcaacctggagcagtaacataagcaaaattttacgcatatagaactgtaggggaaccaccacatcaaaaagtgagctgcgtgaagagctctactagttcatagcagtgtatttcg…	>FBtr0073414 type=three_prime_UTR; loc=X:complement(10787869..10797068);MD5=13ca1636dea1e644efc33fdf009b2825; length=9200; parent=FBgn0285926; release=r6.38; species=Dmel;	-1	5030	-1	c(3278, 3349, 3443)	FBgn0285926	4	0	1	0	3	Imp
FBtr0073416	ggaggaatcaccgttaaaggagagccggcgccgcagcagcagcagcagaagcagcaaaagcagcagcagcagcaacatcagcagcagcagcagcagcagcagcgaaagcgccaaaaatagccaaggcagggttttctactgttgatactacctccacagcacacccataagattcaataccccaagacccaaaagcacccaccacaatttacaaccctatataactacaagctaaccgtaggcgccacctttgtgctggcacaggcgacggcaaaagtaagcaagcaacctggagcagtaacataagcaaaattttacgcatatagaactgtaggggaaccaccacatcaaaaagtgagctgcgtgaagagctctactagttcatagcagtgtatttcg…	>FBtr0073416 type=three_prime_UTR; loc=X:complement(10790805..10797068);MD5=a5b3d4f49cd0976bc97ce20bd755f597; length=6264; parent=FBgn0285926; release=r6.38; species=Dmel;	-1	5030	-1	c(3278, 3349, 3443)	FBgn0285926	4	0	1	0	3	Imp
FBtr0474225	ttagaacggcaggagcaggagaaggagcaacagcaccaccagcacgagcagcaacagttccaacagcaacagtggtcagaggatgcattgggagcgacacttttggctgaaactgaaactgaaccaccactagcaacagcatcgatagcgccaccaccaccatcatctcaaccaccatcatcaccgtcaacaacagcacccagaacccaagtccaaaaccagaccagatccacgaccatcaatagcagcaacaggaagaagaagaacaaggccaagactcagagtaagcaacagacgcagacagcaacagaagcagaaagcaattgcaacgagaagccgaccacagcaaccatgacaaggacaacaacaaagaagagcagcaggatcaagcaaatggca…	>FBtr0474225 type=three_prime_UTR; loc=2R:complement(7737768..7740276);MD5=fd3e6f17efbb841b9ddc1d4db203b790; length=2509; parent=FBgn0286778; release=r6.38; species=Dmel;	1574	c(2299, 2312)	-1	2338	FBgn0286778	4	1	2	0	1	CG46385
FBtr0474229	gatgtggagaagaagatgtgggaaacggttcatgcttgctggcctggccgtgccacttggcactttacgattactgttgattcatcattactcatatattcggttggctactttcttcgttaactgtatgatcagaggtctatttcactgttccttttctatatctctaattgaatgtgtccggcgacttgaaagcctttccacgacacttggcacacacgcgctcctactttaataatgtaactatcccgagagtttgaaccgcagactgaacttcagccgctgttagatgttgaacagggacaccacctaaatcactgacacacaaaaaggacgaaaacgattgcgtatcacatcactagtttggctatatgaaaatccttttacaccatatgcaca…	>FBtr0474229 type=three_prime_UTR; loc=2R:complement(7737768..7739586);MD5=be9a8736ec0f86c427d75f9e7ed685a9; length=1819; parent=FBgn0286778; release=r6.38; species=Dmel;	884	c(1609, 1622)	-1	1648	FBgn0286778	4	1	2	0	1	CG46385
FBtr0073046	aggacggagagaggagaaacaaaccgcgttgccaaagcgaggcatctgtgaaacaccttgcaggatgcctctaaagctgcatccgactgtaaatatatgaaattccatgtgtaaatatgagcaaacctttttgttaaacctataagagctagagatatctgtaaacgaactaaggaggcatatgacagcagttgccgctgctcgttaggacgcggaaacgagagcagaggaaggagagagcagcaggcgatgcttggaccagttatcatattagtaggcaacgacgaagaatgaatggtgcataccctttctccagctatatttaatcagttatcagttaatgttaatcaacctaagctaatgttacctagactcggtgggtacacacacacacacacg…	>FBtr0073046 type=three_prime_UTR; loc=3L:join(3232052..3232239,3232298..3236604);MD5=aec76a279aa8c2b29e31b716d644fed4; length=4495; parent=FBgn0035424; release=r6.38; species=Dmel;	c(88, 110)	3467	4419	-1	FBgn0035424	4	2	1	1	0	Larp4B
FBtr0308061	aggacggagagaggagaaacaaaccgcgttgccaaagcgaggcatctgtgaaacaccttgcaggatgcctctaaagctgcatccgactgtaaatatatgaaattccatgtgtaaatatgagcaaacctttttgttaaacctataagagctagagatatctgtaaacgaactaaggaggcatatgacagttgccgctgctcgttaggacgcggaaacgagagcagaggaaggagagagcagcaggcgatgcttggaccagttatcatattagtaggcaacgacgaagaatgaatggtgcataccctttctccagctatatttaatcagttatcagttaatgttaatcaacctaagctaatgttacctagactcggtgggtacacacacacacacacgcag…	>FBtr0308061 type=three_prime_UTR; loc=3L:join(3232052..3232239,3232301..3236604);MD5=045a80078468c09963be581276b89e7a; length=4492; parent=FBgn0035424; release=r6.38; species=Dmel;	c(88, 110)	3464	4416	-1	FBgn0035424	4	2	1	1	0	Larp4B
FBtr0110990	aagtgccctctcccagctgccaaacatagatttaaccgccgtcttgtgcatttttctgtagatattctgaatttattcgcaatattagggaatatatacgtttagcaatatttttacgaacaatttcgggaattttccaatatttcaaattagtcaagaaaaaaatattttttttttacactttttctgtaaataatcacgtttgatcaaataccaaattgtacataagcttaagaaaaatcgattgtatatctaagtatatgccctttgtcttcaacatagctcgatatctgacatatctagtgtttatctacatatgtagatagatatgtatactaactattagttaggcacagccacaccgagcagcaaattttaggctaattaaaggtttcgtta…	>FBtr0110990 type=three_prime_UTR; loc=X:16955465..16955995;MD5=62ebb02dc5ee0f708f406875a33e88d3; length=531; parent=FBgn0030808; release=r6.38; species=Dmel;	188	220	c(57, 318)	-1	FBgn0030808	4	1	1	2	0	RhoGAP15B
FBtr0290096	aagtgccctctcccagctgccaaacatagatttaaccgccgtcttgtgcatttttctgtagatattctgaatttattcgcaatattagggaatatatacgtttagcaatatttttacgaacaatttcgggaattttccaatatttcaaattagtcaagaaaaaaatattttttttttacactttttctgtaaataatcacgtttgatcaaataccaaattgtacataagcttaagaaaaatcgattgtatatctaagtatatgccctttgtcttcaacatagctcgatatctgacatatctagtgtttatctacatatgtagatagatatgtatactaactattagttaggcacagccacaccgagcagcaaattttaggctaattaaaggtttcgtta…	>FBtr0290096 type=three_prime_UTR; loc=X:16955465..16956234;MD5=0c8029ab7016e90135b2934da676710d; length=770; parent=FBgn0030808; release=r6.38; species=Dmel;	188	220	c(57, 318)	-1	FBgn0030808	4	1	1	2	0	RhoGAP15B
FBtr0074788	gcacagagacccagttgcagtcccagtccctgtccctgtcccagttaccattccaattccaattccagtcccagttccccaaaccctatacccgctaattcccgagtgatgctccatcaacgaaagacaacccactcacatcggctacgatctcaatggcagtcagttcgctggatccggaccagtagctggatccggtcagccggatgcagctcactcacttgtaaatacgattagagatgttaagtttaaccatatggatggcgaggtgtgttgttggcggttcgcagatgcatgccgtatacaagcctggacggtggagtcattgttcacagcactccgctggaccaacagcgaggtcaccgttatacacatataccatatacaatacataatata…	>FBtr0074788 type=three_prime_UTR; loc=X:19726687..19730199;MD5=6448d82ebbbfcfa3c9d21579b56c1226; length=3513; parent=FBgn0031064; release=r6.38; species=Dmel;	223	2151	-1	c(3234, 3480)	FBgn0031064	4	1	1	0	2	CG12531
FBtr0335043	gcacagagacccagttgcagtcccagtccctgtccctgtcccagttaccattccaattccaattccagtcccagttccccaaaccctatacccgctaattcccgagtgatgctccatcaacgaaagacaacccactcacatcggctacgatctcaatggcagtcagttcgctggatccggaccagtagctggatccggtcagccggatgcagctcactcacttgtaaatacgattagagatgttaagtttaaccatatggatggcgaggtgtgttgttggcggttcgcagatgcatgccgtatacaagcctggacggtggagtcattgttcacagcactccgctggaccaacagcgaggtcaccgttatacacatataccatatacaatacataatata…	>FBtr0335043 type=three_prime_UTR; loc=X:19726687..19730199;MD5=6448d82ebbbfcfa3c9d21579b56c1226; length=3513; parent=FBgn0031064; release=r6.38; species=Dmel;	223	2151	-1	c(3234, 3480)	FBgn0031064	4	1	1	0	2	CG12531
FBtr0113429	cattggccgccatgcaaatcgggaaccggaaatggaaatgcagccgttgggacaacgggaagtgatagagccagtggaacaaatagcggtggaaagtgccataacagcgcctgcaactgcaactgcaatggcggcaacaacaccggaagcggaagtgaaaccgacgacgacgacggcgatcctgacgagagccagcatctggaacctgagtggccgaagagctaccgccgcggtggtcaatgttgtggtcagcgtcaacgccgacgtccactgcgacgcgtctactgcgctgtgaatctgtccatcatgggcctcctggtggccgtggagatctacgcccagattgccatattcctgtagatcaaaacacctctctctctctctctctcttaataaaaa…	>FBtr0113429 type=three_prime_UTR; loc=3L:complement(18922419..18923807);MD5=691b8d4ac83874c90231444cc28eaaaf; length=1389; parent=FBgn0052204; release=r6.38; species=Dmel;	c(526, 815, 1171)	-1	-1	1253	FBgn0052204	4	3	0	0	1	CG32204
FBtr0479802	atcaaaacacctctctctctctctctctcttaataaaaatgggttttcccatggccaaaatcatataatataattccaagcgccgtttttggtccacaaggtacattacagtcaacagaacttgaaacatactgtctcaatgtcagcagacactgcagctttaaatgtaaataatttacatacaatatcttcaagtaactaaaacacagatcttttctcactcaagctacagctttcacaatattgcgaaaactcaaatgctataatctatgccatggccatataaagttttacgttctatataatttaaagtaaccaaaaatataaagaacaatatccataaaaaaagaacattttctttttttaagatttctgctaaatcatattttaaaaatttca…	>FBtr0479802 type=three_prime_UTR; loc=3L:complement(18922419..18923447);MD5=5795f45ff5b258c930cd4186552d83e2; length=1029; parent=FBgn0052204; release=r6.38; species=Dmel;	c(166, 455, 811)	-1	-1	893	FBgn0052204	4	3	0	0	1	CG32204
FBtr0075768	ttagtaaactaaaccaactgctgaccacaaaaaagtaatacagcttcatacaaaggccgctttattgcaggttgattcaaattttatgtatctgataatagctaaccggtaccaaacaattaaagcaaccaacccgttctttgattttgcaaaaccaaattataacaacaattacaaggcgcataaagtatgagcttgcacacctttatgtaatgtgaattgaaatcaggagacggacgccatgcaaccaaatgctatcaatgaatgtatattgggagacaaacacacactttgcatagcaagagagtttgggaaaactgaaaacgaagattaactaaattacttagttactttatagtatcgtttatgtcacagcaatcaaaccgcttaacctactta…	>FBtr0075768 type=three_prime_UTR; loc=3L:join(14017878..14017881,14017946..14020148);MD5=af90122134667e2ef3976acf08930e3b; length=2207; parent=FBgn0036398; release=r6.38; species=Dmel;	c(921, 1073, 1690)	1602	-1	-1	FBgn0036398	4	3	1	0	0	upSET
FBtr0333050	ttagtaaactaaaccaactgctgaccacaaaaaagtaatacagcttcatacaaaggccgctttattgcaggttgattcaaattttatgtatctgataatagctaaccggtaccaaacaattaaagcaaccaacccgttctttgattttgcaaaaccaaattataacaacaattacaaggcgcataaagtatgagcttgcacacctttatgtaatgtgaattgaaatcaggagacggacgccatgcaaccaaatgctatcaatgaatgtatattgggagacaaacacacactttgcatagcaagagagtttgggaaaactgaaaacgaagattaactaaattacttagttactttatagtatcgtttatgtcacagcaatcaaaccgcttaacctactta…	>FBtr0333050 type=three_prime_UTR; loc=3L:join(14017878..14017881,14017946..14020148);MD5=af90122134667e2ef3976acf08930e3b; length=2207; parent=FBgn0036398; release=r6.38; species=Dmel;	c(921, 1073, 1690)	1602	-1	-1	FBgn0036398	4	3	1	0	0	upSET
FBtr0075832	ctagaagcaccacccccgcctcagctgcggggtcggggtggtggtggtggcgccagcaccgccagcggcgccgtacagcagctccaggtgcccagtgcagtggaccaggcctccaactccttcgcccagctcagccacattcactacatgactaacaatggccagcagcaacaggcgcagcaacaacaatcgacctcgaagatgcaccactcgcagcaggatatgcgtttgctggcctgcaacggtgggaagccactgaatgctacctcgctgccgcgccaccgaccaccggtggtgcaggagagcaccttgtcacactatagccagccgcttgccaacgggattcgtctcacccaggaccactttaaccacaaccagaaccagagccacaatcagcac…	>FBtr0075832 type=three_prime_UTR; loc=3L:13277312..13279642;MD5=9d24836558ce7a0b72d3d6f3e52985ac; length=2331; parent=FBgn0023095; release=r6.38; species=Dmel;	c(1236, 1693)	1854	-1	1085	FBgn0023095	4	2	1	0	1	caps
FBtr0075833	ctagaagcaccacccccgcctcagctgcggggtcggggtggtggtggtggcgccagcaccgccagcggcgccgtacagcagctccaggtgcccagtgcagtggaccaggcctccaactccttcgcccagctcagccacattcactacatgactaacaatggccagcagcaacaggcgcagcaacaacaatcgacctcgaagatgcaccactcgcagcaggatatgcgtttgctggcctgcaacggtgggaagccactgaatgctacctcgctgccgcgccaccgaccaccggtggtgcaggagagcaccttgtcacactatagccagccgcttgccaacgggattcgtctcacccaggaccactttaaccacaaccagaaccagagccacaatcagcac…	>FBtr0075833 type=three_prime_UTR; loc=3L:13277312..13279642;MD5=9d24836558ce7a0b72d3d6f3e52985ac; length=2331; parent=FBgn0023095; release=r6.38; species=Dmel;	c(1236, 1693)	1854	-1	1085	FBgn0023095	4	2	1	0	1	caps
FBtr0305480	tatccggccaagacgtgcggcactttgggccgcaccatcatcaaaaccaggccggatccggatatcgagctgcattacttctacaagggttaaagaggaaacttgaaaagcaagggaatcgatctaatttaatcgggtttgctgcgtttctcacttttggagagaattttgggaaatacagtacacaaagggcctatattcactttcatttattttctttaaaagtgaaaatcgcagtaaatctgtatattcatactctagttgtatattcctatgttacgtgtattcgagcgaaagcattttgtataaattagtatttagttcgaaaggttgtctaccaggaaaagcgcaggaaaatcgcaggtgtatataagaaaatcttgcgcacaatttggcgga…	>FBtr0305480 type=three_prime_UTR; loc=3L:13278032..13279642;MD5=2272ee4e9ec3c0f8b55eaa8a9c45e2ad; length=1611; parent=FBgn0023095; release=r6.38; species=Dmel;	c(516, 973)	1134	-1	365	FBgn0023095	4	2	1	0	1	caps
FBtr0346864	agaggaaacttgaaaagcaagggaatcgatctaatttaatcgggtttgctgcgtttctcacttttggagagaattttgggaaatacagtacacaaagggcctatattcactttcatttattttctttaaaagtgaaaatcgcagtaaatctgtatattcatactctagttgtatattcctatgttacgtgtattcgagcgaaagcattttgtataaattagtatttagttcgaaaggttgtctaccaggaaaagcgcaggaaaatcgcaggtgtatataagaaaatcttgcgcacaatttggcggacggtgtggattgggcaaaaaaaaaactatttcacattgaccatcctgctgatcggccatttaatttgcatacagtgatcttaatatttaggtt…	>FBtr0346864 type=three_prime_UTR; loc=3L:13278125..13279642;MD5=3c7658141d71cfd94d7d263b3bd4fbd8; length=1518; parent=FBgn0023095; release=r6.38; species=Dmel;	c(423, 880)	1041	-1	272	FBgn0023095	4	2	1	0	1	caps
FBtr0329901	gatggttactgctgacacacccagacaacgcccagtgaaggcaggcaggcgggcaggcaggacatatgagatgaaaattggtccggacttgggattggggcgtcttcctaggattgaggcggatgtaggatagatatacatatatcgagggaatcggggaaatgggactaaggattgctgaagcggcgagtgttccttcttgatttgttgcatttaacgtatgcgtatcgtatcgtaatcgtattctagaccggaatcctgcttttcgactcttgtacatattatataccgaactatacccgaactttccgagcaagtcgacacgaaggattgaaacacagatactagatacccgcaggcggacagacggacagatggacggacacgtgtaatatatat…	>FBtr0329901 type=three_prime_UTR; loc=X:complement(21328668..21331959);MD5=5a4e826aeca210ae55385bb3804496d1; length=3292; parent=FBgn0015558; release=r6.38; species=Dmel;	-1	274	1562	c(449, 2831)	FBgn0015558	4	0	1	1	2	tty
FBtr0329903	gatggttactgctgacacacccagacaacgcccagtgaaggcaggcaggcgggcaggcaggacatatgagatgaaaattggtccggacttgggattggggcgtcttcctaggattgaggcggatgtaggatagatatacatatatcgagggaatcggggaaatgggactaaggattgctgaagcggcgagtgttccttcttgatttgttgcatttaacgtatgcgtatcgtatcgtaatcgtattctagaccggaatcctgcttttcgactcttgtacatattatataccgaactatacccgaactttccgagcaagtcgacacgaaggattgaaacacagatactagatacccgcaggcggacagacggacagatggacggacacgtgtaatatatat…	>FBtr0329903 type=three_prime_UTR; loc=X:complement(21328613..21331959);MD5=4c49e00ae7c1ad2c1c6b82cb1f357fad; length=3347; parent=FBgn0015558; release=r6.38; species=Dmel;	-1	274	1562	c(449, 2831)	FBgn0015558	4	0	1	1	2	tty
FBtr0306679	gctagcccccaaaaagatccaacacccagttgataacaccacatggcttctttttaacgggcttcttgcttcctggcttcatcttctgcctgtcgcatcgcatcgcattgccagcacctaaacaaaacgagcaccgcaacaccgccagaacatcctatttctcatacacgacagcactcggagtagttaacctgtcattttattaattttgtttagtgattttttgtttgtagatttagccaacatcctaacctaatgttaaaagctaactcagctgcatgcgtatattccttaaaaagctaacaatatcccactaactaatgcccgccctgaatgccgagctgatgctaaccgtgctatgtttgttctttctttttccttatgaaatttgtcactcct…	>FBtr0306679 type=three_prime_UTR; loc=X:complement(21292308..21293337);MD5=a9bc2a9c30e09e7e4c2a81f4acb1d3a5; length=1030; parent=FBgn0031170; release=r6.38; species=Dmel;	c(676, 931)	-1	-1	c(690, 728)	FBgn0031170	4	2	0	0	2	Abca3
FBtr0340401	agaaatggatgggcagaacccagccgtatatgtagctacatagagcgttattatagaatctagattcagtagttcagtcaaatttcgtttgccaaataacacagaaacgcactatgaaaacgcagactaacaaacaaacaataagtaataagtatgtgtcgatcgatgtcttcgctataaagtattcaaattagatttgtatgcgaccagaaaccactgaacctgaaccactaatcctgtaactgtaatcctaatggtaacttaaccatagtaggtctagtaagttcttcccaaactcctcaagcatatccccaaagtaaaggaaaccagaaaacaggggcagcaaatgcataagactctgattaaaagaatgaaatcatatatgaaatctaaaacctt…	>FBtr0340401 type=three_prime_UTR; loc=X:20465589..20467065;MD5=b1b0c6349562ab8845ec0e0c3a0584c3; length=1477; parent=FBgn0052506; release=r6.38; species=Dmel;	-1	c(495, 990)	-1	c(1318, 1340)	FBgn0052506	4	0	2	0	2	tbc
FBtr0339557	tgtgtagttagtgaatgtatccaataagcgggttagctaaatagtattaacctgtgacgaccaccatccaaattccgactctcccctcttttatatatataaatatatatatgtatttatattattatattatatttatatttatatatttatatatatatatatatagtgtatatattaaatatgtttgactaaagaggcgcaactctaaaattaataatttaattgaagaagcaacatttttattttcaatcgaatttaaaggaagtggcttcaaccccacaaaacaatgtcacaaccgacttttgaaacatttaagtttgcttctttaatatgattgaattaaaacatgaaaataagacgtaaaaggtgcgtaatcaatacggctaatgaatagta…	>FBtr0339557 type=three_prime_UTR; loc=X:22446990..22447808;MD5=753b1009d3504f45478c70fcfd58cdb6; length=819; parent=FBgn0031183; release=r6.38; species=Dmel;	c(631, 678)	-1	-1	c(170, 601)	FBgn0031183	4	2	0	0	2	CG14621
FBtr0070138	gggatcttttagcccacatggggggctctagaaaaatctcgaactctactattgtacatataacatatacatacatcatagaaggctttgagccgcggtgagagaacatgatcgaacatacgcctagtttttaagcccgaaaaggagaaactgaaatgtgttaatagctttatagatcgcgctcccccaagtacccatcacctccagtttttattagtagttctctagctagtcctaagcctgtaaatagtaaaacgttttattcatagtagaatgaattgtaaataaattatatgaatc	>FBtr0070138 type=three_prime_UTR; loc=X:783003..783302;MD5=c94fe8b0bd350262aa3995a4275b9b15; length=300; parent=FBgn0027343; release=r6.38; species=Dmel;	c(242, 280)	53	-1	-1	FBgn0027343	3	2	1	0	0	fz3
FBtr0112928	gggatcttttagcccacatggggggctctagaaaaatctcgaactctactattgtacatataacatatacatacatcatagaaggctttgagccgcggtgagagaacatgatcgaacatacgcctagtttttaagcccgaaaaggagaaactgaaatgtgttaatagctttatagatcgcgctcccccaagtacccatcacctccagtttttattagtagttctctagctagtcctaagcctgtaaatagtaaaacgttttattcatagtagaatgaattgtaaataaattatatgaatc	>FBtr0112928 type=three_prime_UTR; loc=X:783003..783302;MD5=c94fe8b0bd350262aa3995a4275b9b15; length=300; parent=FBgn0027343; release=r6.38; species=Dmel;	c(242, 280)	53	-1	-1	FBgn0027343	3	2	1	0	0	fz3
FBtr0345511	gggatcttttagcccacatggggggctctagaaaaatctcgaactctactattgtacatataacatatacatacatcatagaaggctttgagccgcggtgagagaacatgatcgaacatacgcctagtttttaagcccgaaaaggagaaactgaaatgtgttaatagctttatagatcgcgctcccccaagtacccatcacctccagtttttattagtagttctctagctagtcctaagcctgtaaatagtaaaacgttttattcatagtagaatgaattgtaaataaattatatgaatcaaaaatgaatgtcgttcaaagtgggctccaaatgcattaggaactcaagataagcaagataaccactgcgcgttctcacggcatctccgtcagccacaa…	>FBtr0345511 type=three_prime_UTR; loc=X:783003..784222;MD5=5a7eb9f430a7d6f6148e1d09f1b7b7dd; length=1220; parent=FBgn0027343; release=r6.38; species=Dmel;	c(242, 280)	53	-1	-1	FBgn0027343	3	2	1	0	0	fz3
FBtr0070244	ggaagggcgccggacagggagcgggatcgagaccgcgacctgctgcttccagccttcgaacagccaaacactcagcaacagcaagcagtccaatacccggccgggaaggaagagccaccggccagtccacagcttgatgggcaggtgcaactcgaactcgaaatggagctgcaactcggagaggatcaggatccggcttggactcatgtagactactggtgctagggctagggcatcatcatcatcacatactaatgttaatcttaaacgccactcgactaagcaggagtacagaaaaataagccgcagttccccctttaaaccccaacaaccaatccgtagcgaagatcccatttcatgcaatgcgatccctgttatcagttatataactaaagcatt…	>FBtr0070244 type=three_prime_UTR; loc=X:complement(1242740..1246514);MD5=480c852f314123b7699c284a816b5c33; length=3775; parent=FBgn0028550; release=r6.38; species=Dmel;	-1	c(893, 1683)	-1	1262	FBgn0028550	3	0	2	0	1	Atf3
FBtr0330391	ggctagggcatcatcatcatcacatactaatgttaatcttaaacgccactcgactaagcaggagtacagaaaaataagccgcagttccccctttaaaccccaacaaccaatccgtagcgaagatcccatttcatgcaatgcgatccctgttatcagttatataactaaagcattctttctttcaaaatcaaagccacacatttcttcctagcctacaactttcttacatagaattgaaagcagaccacagatatttttttgagccacttgcttttcggattcttttatcctaagcaaactttaaaccgctacattttaacacaagcaatccaagttcttccaatagcagagttcccctcaaaggtctggatcccgcgattcaatcaaggaccactcgaa…	>FBtr0330391 type=three_prime_UTR; loc=X:complement(1242740..1246289);MD5=325217608b96ab68845f0738c9af8f12; length=3550; parent=FBgn0028550; release=r6.38; species=Dmel;	-1	c(668, 1458)	-1	1037	FBgn0028550	3	0	2	0	1	Atf3
FBtr0345507	ggaagggcgccggacagggagcgggatcgagaccgcgacctgctgcttccagccttcgaacagccaaacactcagcaacagcaagcagtccaatacccggccgggaaggaagagccaccggccagtccacagcttgatgggcaggtgcaactcgaactcgaaatggagctgcaactcggagaggatcaggatccggcttggactcatgtagactactggtgctagggctagggcatcatcatcatcacatactaatgttaatcttaaacgccactcgactaagcaggagtacagaaaaataagccgcagttccccctttaaaccccaacaaccaatccgtagcgaagatcccatttcatgcaatgcgatccctgttatcagttatataactaaagcatt…	>FBtr0345507 type=three_prime_UTR; loc=X:complement(1242740..1246514);MD5=480c852f314123b7699c284a816b5c33; length=3775; parent=FBgn0028550; release=r6.38; species=Dmel;	-1	c(893, 1683)	-1	1262	FBgn0028550	3	0	2	0	1	Atf3
FBtr0070501	ctctggaggaatccggatctgccaacagtatttgtccgtaacccggaggccgccgttcggtaattgctctggtgtatccggtgcatccggtgtccttgatattccccacgttttgtgtgtatatatattaggatggatattaacgtctggacaattcgtagcactttctgttgagacgataattgtaatgtaaagcagcgataagaatacttaatgatttatgtaatttaaatgtatttagggtattcactagcgaaactaaagtgtagttaatgaaatgatgcagcttgaatgcacgttttattgatcattttaattgttactttgcgaatgctgaggaatgccagcagtatttactggacaacaccacacataccgtgcctatccttttgtaaatat…	>FBtr0070501 type=three_prime_UTR; loc=X:complement(2701124..2701837);MD5=18aae1dd69e257ce0ee9b51faccfa1c0; length=714; parent=FBgn0024994; release=r6.38; species=Dmel;	391	-1	-1	c(118, 526)	FBgn0024994	3	1	0	0	2	Ugalt
FBtr0273276	ctctggaggaatccggatctgccaacagtatttgtccgtaacccggaggccgccgttcggtaattgctctggtgtatccggtgcatccggtgtccttgatattccccacgttttgtgtgtatatatattaggatggatattaacgtctggacaattcgtagcactttctgttgagacgataattgtaatgtaaagcagcgataagaatacttaatgatttatgtaatttaaatgtatttagggtattcactagcgaaactaaagtgtagttaatgaaatgatgcagcttgaatgcacgttttattgatcattttaattgttactttgcgaatgctgaggaatgccagcagtatttactggacaacaccacacataccgtgcctatccttttgtaaatat…	>FBtr0273276 type=three_prime_UTR; loc=X:complement(2701124..2701837);MD5=18aae1dd69e257ce0ee9b51faccfa1c0; length=714; parent=FBgn0024994; release=r6.38; species=Dmel;	391	-1	-1	c(118, 526)	FBgn0024994	3	1	0	0	2	Ugalt
FBtr0345710	ctctggaggaatccggatctgccaacagtatttgtccgtaacccggaggccgccgttcggtaattgctctggtgtatccggtgcatccggtgtccttgatattccccacgttttgtgtgtatatatattaggatggatattaacgtctggacaattcgtagcactttctgttgagacgataattgtaatgtaaagcagcgataagaatacttaatgatttatgtaatttaaatgtatttagggtattcactagcgaaactaaagtgtagttaatgaaatgatgcagcttgaatgcacgttttattgatcattttaattgttactttgcgaatgctgaggaatgccagcagtatttactggacaacaccacacataccgtgcctatccttttgtaaatat…	>FBtr0345710 type=three_prime_UTR; loc=X:complement(2701124..2701837);MD5=18aae1dd69e257ce0ee9b51faccfa1c0; length=714; parent=FBgn0024994; release=r6.38; species=Dmel;	391	-1	-1	c(118, 526)	FBgn0024994	3	1	0	0	2	Ugalt
FBtr0070519	cggagagtcgtgggaatttatcgcaaattacaggaaaaggctcacaactttttcctattacgttagtgactactattaacacagaaaaaaccaaaacaaaaacctaaaacgaaaagcaaaaaaaaaaacaaagaaaaactcttggaaaaaatgcaaaaaaaaatccacaaaaaaaaaaccaaaaaacccaagtaaggaaatattaaaccaatgtttaaacgcatacaaaaatccaaacagcaatagcaaaactaacgttaaacctataaagtctagagaaaatcgaaaaaggaaattagaaatttacttaatggaacccgagattgatgttgaaaatacactgaaaaagaaggaggaggccgagctaactaagataaaatcgtacatattgttaaaaac…	>FBtr0070519 type=three_prime_UTR; loc=X:3339174..3343767;MD5=a047417981bed277eb31c394370f4e26; length=4594; parent=FBgn0000479; release=r6.38; species=Dmel;	1122	-1	-1	c(3103, 4296)	FBgn0000479	3	1	0	0	2	dnc
FBtr0333312	cggagagtcgtgggaatttatcgcaaattacaggaaaaggctcacaactttttcctattacgttagtgactactattaacacagaaaaaaccaaaacaaaaacctaaaacgaaaagcaaaaaaaaaaacaaagaaaaactcttggaaaaaatgcaaaaaaaaatccacaaaaaaaaaaccaaaaaacccaagtaaggaaatattaaaccaatgtttaaacgcatacaaaaatccaaacagcaatagcaaaactaacgttaaacctataaagtctagagaaaatcgaaaaaggaaattagaaatttacttaatggaacccgagattgatgttgaaaatacactgaaaaagaaggaggaggccgagctaactaagataaaatcgtacatattgttaaaaac…	>FBtr0333312 type=three_prime_UTR; loc=X:3339174..3343767;MD5=a047417981bed277eb31c394370f4e26; length=4594; parent=FBgn0000479; release=r6.38; species=Dmel;	1122	-1	-1	c(3103, 4296)	FBgn0000479	3	1	0	0	2	dnc
FBtr0333313	cggagagtcgtgggaatttatcgcaaattacaggaaaaggctcacaactttttcctattacgttagtgactactattaacacagaaaaaaccaaaacaaaaacctaaaacgaaaagcaaaaaaaaaaacaaagaaaaactcttggaaaaaatgcaaaaaaaaatccacaaaaaaaaaaccaaaaaacccaagtaaggaaatattaaaccaatgtttaaacgcatacaaaaatccaaacagcaatagcaaaactaacgttaaacctataaagtctagagaaaatcgaaaaaggaaattagaaatttacttaatggaacccgagattgatgttgaaaatacactgaaaaagaaggaggaggccgagctaactaagataaaatcgtacatattgttaaaaac…	>FBtr0333313 type=three_prime_UTR; loc=X:3339174..3343767;MD5=a047417981bed277eb31c394370f4e26; length=4594; parent=FBgn0000479; release=r6.38; species=Dmel;	1122	-1	-1	c(3103, 4296)	FBgn0000479	3	1	0	0	2	dnc
FBtr0333314	cggagagtcgtgggaatttatcgcaaattacaggaaaaggctcacaactttttcctattacgttagtgactactattaacacagaaaaaaccaaaacaaaaacctaaaacgaaaagcaaaaaaaaaaacaaagaaaaactcttggaaaaaatgcaaaaaaaaatccacaaaaaaaaaaccaaaaaacccaagtaaggaaatattaaaccaatgtttaaacgcatacaaaaatccaaacagcaatagcaaaactaacgttaaacctataaagtctagagaaaatcgaaaaaggaaattagaaatttacttaatggaacccgagattgatgttgaaaatacactgaaaaagaaggaggaggccgagctaactaagataaaatcgtacatattgttaaaaac…	>FBtr0333314 type=three_prime_UTR; loc=X:3339174..3343767;MD5=a047417981bed277eb31c394370f4e26; length=4594; parent=FBgn0000479; release=r6.38; species=Dmel;	1122	-1	-1	c(3103, 4296)	FBgn0000479	3	1	0	0	2	dnc
FBtr0333315	cggagagtcgtgggaatttatcgcaaattacaggaaaaggctcacaactttttcctattacgttagtgactactattaacacagaaaaaaccaaaacaaaaacctaaaacgaaaagcaaaaaaaaaaacaaagaaaaactcttggaaaaaatgcaaaaaaaaatccacaaaaaaaaaaccaaaaaacccaagtaaggaaatattaaaccaatgtttaaacgcatacaaaaatccaaacagcaatagcaaaactaacgttaaacctataaagtctagagaaaatcgaaaaaggaaattagaaatttacttaatggaacccgagattgatgttgaaaatacactgaaaaagaaggaggaggccgagctaactaagataaaatcgtacatattgttaaaaac…	>FBtr0333315 type=three_prime_UTR; loc=X:3339174..3343767;MD5=a047417981bed277eb31c394370f4e26; length=4594; parent=FBgn0000479; release=r6.38; species=Dmel;	1122	-1	-1	c(3103, 4296)	FBgn0000479	3	1	0	0	2	dnc
FBtr0333316	cggagagtcgtgggaatttatcgcaaattacaggaaaaggctcacaactttttcctattacgttagtgactactattaacacagaaaaaaccaaaacaaaaacctaaaacgaaaagcaaaaaaaaaaacaaagaaaaactcttggaaaaaatgcaaaaaaaaatccacaaaaaaaaaaccaaaaaacccaagtaaggaaatattaaaccaatgtttaaacgcatacaaaaatccaaacagcaatagcaaaactaacgttaaacctataaagtctagagaaaatcgaaaaaggaaattagaaatttacttaatggaacccgagattgatgttgaaaatacactgaaaaagaaggaggaggccgagctaactaagataaaatcgtacatattgttaaaaac…	>FBtr0333316 type=three_prime_UTR; loc=X:3339174..3343767;MD5=a047417981bed277eb31c394370f4e26; length=4594; parent=FBgn0000479; release=r6.38; species=Dmel;	1122	-1	-1	c(3103, 4296)	FBgn0000479	3	1	0	0	2	dnc
FBtr0333317	cggagagtcgtgggaatttatcgcaaattacaggaaaaggctcacaactttttcctattacgttagtgactactattaacacagaaaaaaccaaaacaaaaacctaaaacgaaaagcaaaaaaaaaaacaaagaaaaactcttggaaaaaatgcaaaaaaaaatccacaaaaaaaaaaccaaaaaacccaagtaaggaaatattaaaccaatgtttaaacgcatacaaaaatccaaacagcaatagcaaaactaacgttaaacctataaagtctagagaaaatcgaaaaaggaaattagaaatttacttaatggaacccgagattgatgttgaaaatacactgaaaaagaaggaggaggccgagctaactaagataaaatcgtacatattgttaaaaac…	>FBtr0333317 type=three_prime_UTR; loc=X:3339174..3343767;MD5=a047417981bed277eb31c394370f4e26; length=4594; parent=FBgn0000479; release=r6.38; species=Dmel;	1122	-1	-1	c(3103, 4296)	FBgn0000479	3	1	0	0	2	dnc
FBtr0333795	tacgcagtctaatggaaccaccagtacattcgacaagagaatcaacaacgcatcactgcagcgaagaaagaagtggatcgtaaggatcgtactacaagacattcaacgagcacacacactatcaagcgaaaagctagttgtagtgtgtaacactcagtttaaggatatcaacactcatcaacacttcatcaacacacatatgcatccgaaacgaacacatacaatggagttaattgaacgcagtctaaaaacttcgacaacgaaacataacacacacattaaaaggtttgcaattcattaacgatcagataacacaaattatagtgtgaaggtccaaggttctaactaattctaacaacattctaaccgatcgttcagcaacgacattttcacacagac…	>FBtr0333795 type=three_prime_UTR; loc=X:complement(3507245..3513002);MD5=afc8220b456dba1fcf112291a56cd867; length=5758; parent=FBgn0052791; release=r6.38; species=Dmel;	-1	-1	-1	c(5470, 5569, 5616)	FBgn0052791	3	0	0	0	3	DIP-alpha
FBtr0070841	cgatggctcatgtggcaccactgagcccgcggggtcatccaatccatctgtctgtgatgtcaacaaaatcgaaatcgaaatctaaaccgaaactgggaaggggaagagcagccgcggaagccaagaattctcgtcaatttccatatactgtaaataattgccaggacaggtagcccacaggatctggatggggatcaacgcataccaaacaagcaacaataatattaacaatttccatatactgtaaataattgccaggacaggtagcccacaggatctggatggggatcaacgcataccaaacaagcaacaataatattaacaacaaaaccaacaagcagccacaattctaaatgagagaaaacaccacatttttagggcaagctagctacatgtaat…	>FBtr0070841 type=three_prime_UTR; loc=X:complement(5738663..5739981);MD5=4e6ceea4939030bc85a7c689b6c97e47; length=1319; parent=FBgn0261383; release=r6.38; species=Dmel;	c(149, 243)	-1	-1	805	FBgn0261383	3	2	0	0	1	IntS6
FBtr0070842	cgatggctcatgtggcaccactgagcccgcggggtcatccaatccatctgtctgtgatgtcaacaaaatcgaaatcgaaatctaaaccgaaactgggaaggggaagagcagccgcggaagccaagaattctcgtcaatttccatatactgtaaataattgccaggacaggtagcccacaggatctggatggggatcaacgcataccaaacaagcaacaataatattaacaatttccatatactgtaaataattgccaggacaggtagcccacaggatctggatggggatcaacgcataccaaacaagcaacaataatattaacaacaaaaccaacaagcagccacaattctaaatgagagaaaacaccacatttttagggcaagctagctacatgtaat…	>FBtr0070842 type=three_prime_UTR; loc=X:complement(5738663..5739981);MD5=4e6ceea4939030bc85a7c689b6c97e47; length=1319; parent=FBgn0261383; release=r6.38; species=Dmel;	c(149, 243)	-1	-1	805	FBgn0261383	3	2	0	0	1	IntS6
FBtr0332399	cgatggctcatgtggcaccactgagcccgcggggtcatccaatccatctgtctgtgatgtcaacaaaatcgaaatcgaaatctaaaccgaaactgggaaggggaagagcagccgcggaagccaagaattctcgtcaatttccatatactgtaaataattgccaggacaggtagcccacaggatctggatggggatcaacgcataccaaacaagcaacaataatattaacaatttccatatactgtaaataattgccaggacaggtagcccacaggatctggatggggatcaacgcataccaaacaagcaacaataatattaacaacaaaaccaacaagcagccacaattctaaatgagagaaaacaccacatttttagggcaagctagctacatgtaat…	>FBtr0332399 type=three_prime_UTR; loc=X:complement(5738663..5739981);MD5=4e6ceea4939030bc85a7c689b6c97e47; length=1319; parent=FBgn0261383; release=r6.38; species=Dmel;	c(149, 243)	-1	-1	805	FBgn0261383	3	2	0	0	1	IntS6
FBtr0332400	cgatggctcatgtggcaccactgagcccgcggggtcatccaatccatctgtctgtgatgtcaacaaaatcgaaatcgaaatctaaaccgaaactgggaaggggaagagcagccgcggaagccaagaattctcgtcaatttccatatactgtaaataattgccaggacaggtagcccacaggatctggatggggatcaacgcataccaaacaagcaacaataatattaacaatttccatatactgtaaataattgccaggacaggtagcccacaggatctggatggggatcaacgcataccaaacaagcaacaataatattaacaacaaaaccaacaagcagccacaattctaaatgagagaaaacaccacatttttagggcaagctagctacatgtaat…	>FBtr0332400 type=three_prime_UTR; loc=X:complement(5738663..5739981);MD5=4e6ceea4939030bc85a7c689b6c97e47; length=1319; parent=FBgn0261383; release=r6.38; species=Dmel;	c(149, 243)	-1	-1	805	FBgn0261383	3	2	0	0	1	IntS6
FBtr0332401	cgatggctcatgtggcaccactgagcccgcggggtcatccaatccatctgtctgtgatgtcaacaaaatcgaaatcgaaatctaaaccgaaactgggaaggggaagagcagccgcggaagccaagaattctcgtcaatttccatatactgtaaataattgccaggacaggtagcccacaggatctggatggggatcaacgcataccaaacaagcaacaataatattaacaatttccatatactgtaaataattgccaggacaggtagcccacaggatctggatggggatcaacgcataccaaacaagcaacaataatattaacaacaaaaccaacaagcagccacaattctaaatgagagaaaacaccacatttttagggcaagctagctacatgtaat…	>FBtr0332401 type=three_prime_UTR; loc=X:complement(5738663..5739981);MD5=4e6ceea4939030bc85a7c689b6c97e47; length=1319; parent=FBgn0261383; release=r6.38; species=Dmel;	c(149, 243)	-1	-1	805	FBgn0261383	3	2	0	0	1	IntS6
FBtr0111038	gtcatctattgtacattttagttattgagcaaagcgataattataatatctatatagcatattgaatgaaatatctgtataatccgaatcgaaacgacccgaacgccattttcttcaacacctaacccacacacagcgtacgagtatatagtgaattcttaatgttccttcgttctctgctaatattaatgtaaataaattaaacatttgtctgttttacactatctacacactaaaataagtttctaaaactatttgtatatacatcagcatactataatacacccacaatctatgaaaattattctctaaatatgcatatgtattattgtataactctaatcctctccagacacttgaaacaccaatttacccctgggcaaccttctatgcccatac…	>FBtr0111038 type=three_prime_UTR; loc=3L:21074677..21075444;MD5=cd71062f0197262b0784e7ce11f7d1ee; length=768; parent=FBgn0026179; release=r6.38; species=Dmel;	190	-1	-1	c(257, 577)	FBgn0026179	3	1	0	0	2	siz
FBtr0078289	gtcatctattgtacattttagttattgagcaaagcgataattataatatctatatagcatattgaatgaaatatctgtataatccgaatcgaaacgacccgaacgccattttcttcaacacctaacccacacacagcgtacgagtatatagtgaattcttaatgttccttcgttctctgctaatattaatgtaaataaattaaacatttgtctgttttacactatctacacactaaaataagtttctaaaactatttgtatatacatcagcatactataatacacccacaatctatgaaaattattctctaaatatgcatatgtattattgtataactctaatcctctccagacacttgaaacaccaatttacccctgggcaaccttctatgcccatac…	>FBtr0078289 type=three_prime_UTR; loc=3L:21074677..21075444;MD5=cd71062f0197262b0784e7ce11f7d1ee; length=768; parent=FBgn0026179; release=r6.38; species=Dmel;	190	-1	-1	c(257, 577)	FBgn0026179	3	1	0	0	2	siz
FBtr0078290	gtcatctattgtacattttagttattgagcaaagcgataattataatatctatatagcatattgaatgaaatatctgtataatccgaatcgaaacgacccgaacgccattttcttcaacacctaacccacacacagcgtacgagtatatagtgaattcttaatgttccttcgttctctgctaatattaatgtaaataaattaaacatttgtctgttttacactatctacacactaaaataagtttctaaaactatttgtatatacatcagcatactataatacacccacaatctatgaaaattattctctaaatatgcatatgtattattgtataactctaatcctctccagacacttgaaacaccaatttacccctgggcaaccttctatgcccatac…	>FBtr0078290 type=three_prime_UTR; loc=3L:21074677..21075444;MD5=cd71062f0197262b0784e7ce11f7d1ee; length=768; parent=FBgn0026179; release=r6.38; species=Dmel;	190	-1	-1	c(257, 577)	FBgn0026179	3	1	0	0	2	siz
FBtr0301602	gtcatctattgtacattttagttattgagcaaagcgataattataatatctatatagcatattgaatgaaatatctgtataatccgaatcgaaacgacccgaacgccattttcttcaacacctaacccacacacagcgtacgagtatatagtgaattcttaatgttccttcgttctctgctaatattaatgtaaataaattaaacatttgtctgttttacactatctacacactaaaataagtttctaaaactatttgtatatacatcagcatactataatacacccacaatctatgaaaattattctctaaatatgcatatgtattattgtataactctaatcctctccagacacttgaaacaccaatttacccctgggcaaccttctatgcccatac…	>FBtr0301602 type=three_prime_UTR; loc=3L:21074677..21075444;MD5=cd71062f0197262b0784e7ce11f7d1ee; length=768; parent=FBgn0026179; release=r6.38; species=Dmel;	190	-1	-1	c(257, 577)	FBgn0026179	3	1	0	0	2	siz
FBtr0078666	gactccacaaatggacaaaacccgttcccaaaatagcttaaggttgtcgcttctgttgtctaggtatagctagattaagcttagcacatgaccataccttgtaagcacagctcctatatttatattatttagtgatttgcctaagttgtaaacgtggtacagccaaagaccctagaataacaagatgcgtaacgccatacgattttttggcacacgattttttggccgtggctctagaggtggctccaggctctctcgaatttttgttagagagcgagagagcgaagagcgctacagcgaacagctcttttcaacgcacaaagtgatagcagacatctgtatgtgtgcacacgtattcacatgcattgtaaatttgacaaaatatgcccttcaccttag…	>FBtr0078666 type=three_prime_UTR; loc=3R:complement(5822026..5823704);MD5=ae4b6a3cbe64c559bd76d9a7f755146f; length=1679; parent=FBgn0037383; release=r6.38; species=Dmel;	-1	520	1335	1603	FBgn0037383	3	0	1	1	1	Sec20
FBtr0344273	gggaactgcagcatggccactgtcactgtctagtacaatttcgatctaccaactaagctagctcgctttgtgccctcgtccactctacacaaactctctcccaaggcgaagttctatcgagccgagcgaagattgtaaatacataaacgtaactaccaaattatagcaatccattttaaaaactacatacatatgtgtaggcatgtatcgggagcactccagttgcagttgttagcaaacgaaacaaaggcaaatcaaatgttaactcgaaaaagacaaaacgcttaaatgtttaagagcagaggcaaacagagaaggcatagacatacatatacaaacaaacaaacaagcactgtggcaaacataaatgtaaacgttaatcaggtgagcaatttctaa…	>FBtr0344273 type=three_prime_UTR; loc=3R:complement(5478390..5480736);MD5=3c10569cf125f91aca710f15d1621a54; length=2347; parent=FBgn0015402; release=r6.38; species=Dmel;	134	-1	-1	c(472, 551)	FBgn0015402	3	1	0	0	2	ksr
FBtr0308119	tgcagcaccagcagcaaccaggacaacggcaacatcagcagcagcaacagcaacttgcaacacatgagacaggcgcctaccaagtacgcgtcgatgaaatagccgcctcaaggaataattaatagatcctcccctaaaacagtactatatatacacacccatcaaagcttttagaatcaaaagtaattaactctaaaaatattaagagatgaaacaaaattctgtctagctgctatgagaaattgttgtccgacggtgagaaaagaggaaatgagcgatctttttttcttttagtaatggtagtaattgataaacgatacaaaaacaaacaacaacaaaaaaaaaaaatgcaaactattgtagtgatatttgttataaaataattttagtaattaattt…	>FBtr0308119 type=three_prime_UTR; loc=3R:complement(5077779..5084372);MD5=a713e55fecc8b1410450a09271c3af57; length=6594; parent=FBgn0010313; release=r6.38; species=Dmel;	-1	c(1261, 5358)	6100	-1	FBgn0010313	3	0	2	1	0	corto
FBtr0307041	ccagagttttgcgccttggctaaaggcttgaaccatccgagcgatgcacacgaagacgatctgctggagctattcaaagactttgagcagcaacagcagccgcatcagcagcagcagcaacagctggagatcagcagcagcagctttcctttagcccaggcgcaggacgaggacggtgatgagatggccgaatatgagaatctggcgcgagcagccggtggttacatggaggaggccgatcatttgctgtcctaccacagtagcagcagtgccgcggatgttgaggtggatgaggtgctgatgccggagctggacaatgccacggccttggactgcgccagctttgtcgactacgatgagttcaatctgtgcctgaacaacatcctcagcgaggaggac…	>FBtr0307041 type=three_prime_UTR; loc=2L:complement(5315290..5317812);MD5=d269f9320cc30c7205a9253d3176b1cd; length=2523; parent=FBgn0031698; release=r6.38; species=Dmel;	1179	-1	-1	c(629, 1820)	FBgn0031698	3	1	0	0	2	Ncoa6
FBtr0329969	tggagtcggattacggacggctacttgtatatatcacacgcactgataccgaacgctttcgtttgtagttcttagccctagtttccgttgaggattattttgtatagttagtggtagccacaagttgcaataatgttgcgtctcatagcgagcaacatcacacccagacacactctctcacacatacacacaaacacccacccatacacacatactgcagacagacggttgcaagcgccgatttacgcctttgttaacactttgttttctgccccccagtccgagcttatccgccaatcaccccttctcatctggcactgctattactccccaaaaaaatccacccattggaaatgatttgctagtcatgtgaaacaggcaatttaatgtatagctcag…	>FBtr0329969 type=three_prime_UTR; loc=2L:complement(5315426..5317209);MD5=c3bf01232316d7039f4b6f68bed74f9e; length=1784; parent=FBgn0031698; release=r6.38; species=Dmel;	576	-1	-1	c(26, 1217)	FBgn0031698	3	1	0	0	2	Ncoa6
FBtr0079087	gcagctgtttgtagtctcgttttaggtttaacctaagttgcatttagttttctgtttttgttcaacttctgttgaatacgcagttccgaccttttgtccggaaattcatagttaggttctaatcgtaagttgcttgtacgtgagcggagtaaagcagaggatccttcagaggtgcctatactacggttacttaaaccgtcgcactgattgtaagctagagtttagatataagttggcaggagctagttactaaggccccttgcaaaatctttggttagaaaaatgctttaactatttgagaaatatagggagtattttggatgacacctattcatgtcgatgtacataaatatgagatcaaaacaaaaaatcaatcgaaagaatcgaaatttatatgta…	>FBtr0079087 type=three_prime_UTR; loc=2L:complement(5219000..5220092);MD5=e50f023d1ea1efa805a71747717a8541; length=1093; parent=FBgn0003716; release=r6.38; species=Dmel;	c(754, 836)	341	-1	-1	FBgn0003716	3	2	1	0	0	tkv
FBtr0079088	gcagctgtttgtagtctcgttttaggtttaacctaagttgcatttagttttctgtttttgttcaacttctgttgaatacgcagttccgaccttttgtccggaaattcatagttaggttctaatcgtaagttgcttgtacgtgagcggagtaaagcagaggatccttcagaggtgcctatactacggttacttaaaccgtcgcactgattgtaagctagagtttagatataagttggcaggagctagttactaaggccccttgcaaaatctttggttagaaaaatgctttaactatttgagaaatatagggagtattttggatgacacctattcatgtcgatgtacataaatatgagatcaaaacaaaaaatcaatcgaaagaatcgaaatttatatgta…	>FBtr0079088 type=three_prime_UTR; loc=2L:complement(5219000..5220092);MD5=e50f023d1ea1efa805a71747717a8541; length=1093; parent=FBgn0003716; release=r6.38; species=Dmel;	c(754, 836)	341	-1	-1	FBgn0003716	3	2	1	0	0	tkv
FBtr0079089	gcagctgtttgtagtctcgttttaggtttaacctaagttgcatttagttttctgtttttgttcaacttctgttgaatacgcagttccgaccttttgtccggaaattcatagttaggttctaatcgtaagttgcttgtacgtgagcggagtaaagcagaggatccttcagaggtgcctatactacggttacttaaaccgtcgcactgattgtaagctagagtttagatataagttggcaggagctagttactaaggccccttgcaaaatctttggttagaaaaatgctttaactatttgagaaatatagggagtattttggatgacacctattcatgtcgatgtacataaatatgagatcaaaacaaaaaatcaatcgaaagaatcgaaatttatatgta…	>FBtr0079089 type=three_prime_UTR; loc=2L:complement(5219000..5220092);MD5=e50f023d1ea1efa805a71747717a8541; length=1093; parent=FBgn0003716; release=r6.38; species=Dmel;	c(754, 836)	341	-1	-1	FBgn0003716	3	2	1	0	0	tkv
FBtr0079086	gcagctgtttgtagtctcgttttaggtttaacctaagttgcatttagttttctgtttttgttcaacttctgttgaatacgcagttccgaccttttgtccggaaattcatagttaggttctaatcgtaagttgcttgtacgtgagcggagtaaagcagaggatccttcagaggtgcctatactacggttacttaaaccgtcgcactgattgtaagctagagtttagatataagttggcaggagctagttactaaggccccttgcaaaatctttggttagaaaaatgctttaactatttgagaaatatagggagtattttggatgacacctattcatgtcgatgtacataaatatgagatcaaaacaaaaaatcaatcgaaagaatcgaaatttatatgta…	>FBtr0079086 type=three_prime_UTR; loc=2L:complement(5219000..5220092);MD5=e50f023d1ea1efa805a71747717a8541; length=1093; parent=FBgn0003716; release=r6.38; species=Dmel;	c(754, 836)	341	-1	-1	FBgn0003716	3	2	1	0	0	tkv
FBtr0079474	tagcgaatcaggctgggactggaaaagatccgaacaaactagacactcgtagctatggctaatattaaaacggctggaactggacagtattcactcttaatagtggtactgatcagtacgattggtaaaggacttagaaagcgctcttacccaacaattatccacgcaaaactgtaaataaatcttttttttctacaaacttcagtcaaaagaacatgtacatttgataaaaagcttatacaaatttgcttcttgaaaattgcgctttaattgggattccttatctgtataaaaatattttctttgctaatggcaacaagccatagctctactgaccaaacgaaattttccaaacaaatggtaccaacatactgatcagcgcacttccagagttttgtc…	>FBtr0079474 type=three_prime_UTR; loc=2L:7683906..7684537;MD5=ea292507ff0005f42a7f3abce8cf8b45; length=632; parent=FBgn0040299; release=r6.38; species=Dmel;	c(173, 603)	-1	-1	519	FBgn0040299	3	2	0	0	1	Myo28B1
FBtr0079476	tagcgaatcaggctgggactggaaaagatccgaacaaactagacactcgtagctatggctaatattaaaacggctggaactggacagtattcactcttaatagtggtactgatcagtacgattggtaaaggacttagaaagcgctcttacccaacaattatccacgcaaaactgtaaataaatcttttttttctacaaacttcagtcaaaagaacatgtacatttgataaaaagcttatacaaatttgcttcttgaaaattgcgctttaattgggattccttatctgtataaaaatattttctttgctaatggcaacaagccatagctctactgaccaaacgaaattttccaaacaaatggtaccaacatactgatcagcgcacttccagagttttgtc…	>FBtr0079476 type=three_prime_UTR; loc=2L:7683906..7684537;MD5=ea292507ff0005f42a7f3abce8cf8b45; length=632; parent=FBgn0040299; release=r6.38; species=Dmel;	c(173, 603)	-1	-1	519	FBgn0040299	3	2	0	0	1	Myo28B1
FBtr0329931	gacgggagtggggcggctgaaaccagtcagggactaattacccaaaatatgtaactcaacaccgctcgaatagcccccagcagcagcagcagcagtcgcagcagccgcactccagttctggctcctcgcccgtaatgtccaacagcagcagcagtccggctccgccctccagcagtcccagtccgcaggagagccccaagaactgcagctacatctaccgtgattgattgatatgcaacaccaaatcgatgccactcatccaggcccagtctacgcacgcccagccacacccacagtcgcacccgcacccgcttccgccacccggtccgaccacgcccccagcacagccacgcgccagaagtccaatgatcggcaggacatatgccaagtccatgcccg…	>FBtr0329931 type=three_prime_UTR; loc=2L:join(8664170..8664220,8666036..8671917);MD5=3f7976e5b06e47797e1363839fd6d4cb; length=5933; parent=FBgn0011259; release=r6.38; species=Dmel;	c(1400, 4291)	-1	-1	2020	FBgn0011259	3	2	0	0	1	Sema1a
FBtr0303877	ttgatatgcaacaccaaatcgatgccactcatccaggcccagtctacgcacgcccagccacacccacagtcgcacccgcacccgcttccgccacccggtccgaccacgcccccagcacagccacgcgccagaagtccaatgatcggcaggacatatgccaagtccatgcccgtgacaccagttcaaccgcaatcgccgctggctgagacgccctcctatgagctctacgaacgccactcggatgcggccaccttccactttggggatgaggacgatgacgatgatgatgagcacgaccacgaagacacctcatccctggccatgatcacaccgccgccgccctacgacactccgcatctgattgcatcgccgccgctaccgccgcctcgtagatttcgc…	>FBtr0303877 type=three_prime_UTR; loc=2L:8666212..8671917;MD5=a8cabc88a5d2082607038b3c050816f1; length=5706; parent=FBgn0011259; release=r6.38; species=Dmel;	c(1173, 4064)	-1	-1	1793	FBgn0011259	3	2	0	0	1	Sema1a
FBtr0303878	ttgatatgcaacaccaaatcgatgccactcatccaggcccagtctacgcacgcccagccacacccacagtcgcacccgcacccgcttccgccacccggtccgaccacgcccccagcacagccacgcgccagaagtccaatgatcggcaggacatatgccaagtccatgcccgtgacaccagttcaaccgcaatcgccgctggctgagacgccctcctatgagctctacgaacgccactcggatgcggccaccttccactttggggatgaggacgatgacgatgatgatgagcacgaccacgaagacacctcatccctggccatgatcacaccgccgccgccctacgacactccgcatctgattgcatcgccgccgctaccgccgcctcgtagatttcgc…	>FBtr0303878 type=three_prime_UTR; loc=2L:8666212..8672041;MD5=1917cd02839da17e9fd7ba4e24ab76e1; length=5830; parent=FBgn0011259; release=r6.38; species=Dmel;	c(1173, 4064)	-1	-1	1793	FBgn0011259	3	2	0	0	1	Sema1a
FBtr0303873	ccctaaggtgcctagttcagaaccaaggatcacgtacaaccaaaacttctcttgcgcacgcatttatggctctagatacgaaaaacaataggaaatcaatggatgaaaggcgaagcatgtacatctaattaaaaatattagcagcactatttaaaaaatatatatctaaatatatttattttataatactagcaaatattaattttaaagcaaaatgggaacctcgtctaaaagaaatcgcgaaaacataaataccagacacaagctctagttaaatattttgaaaacagcataataacttcataagaagatgcaaacatgatataagtaatgcatatttattacgtttaaagataaagcctagtactaagagctatatatacaaaagaatgaaagcag…	>FBtr0303873 type=three_prime_UTR; loc=2L:9245809..9250211;MD5=50b00534b5681016427f910ed4091f5c; length=4403; parent=FBgn0041092; release=r6.38; species=Dmel;	c(877, 1665, 2389)	-1	-1	-1	FBgn0041092	3	3	0	0	0	tai
FBtr0304974	ccctaaggtgcctagttcagaaccaaggatcacgtacaaccaaaacttctcttgcgcacgcatttatggctctagatacgaaaaacaataggaaatcaatggatgaaaggcgaagcatgtacatctaattaaaaatattagcagcactatttaaaaaatatatatctaaatatatttattttataatactagcaaatattaattttaaagcaaaatgggaacctcgtctaaaagaaatcgcgaaaacataaataccagacacaagctctagttaaatattttgaaaacagcataataacttcataagaagatgcaaacatgatataagtaatgcatatttattacgtttaaagataaagcctagtactaagagctatatatacaaaagaatgaaagcag…	>FBtr0304974 type=three_prime_UTR; loc=2L:9245809..9250211;MD5=50b00534b5681016427f910ed4091f5c; length=4403; parent=FBgn0041092; release=r6.38; species=Dmel;	c(877, 1665, 2389)	-1	-1	-1	FBgn0041092	3	3	0	0	0	tai
FBtr0080004	aacttataatcgatggtatttggaatggagcaacttcaatcattcgaggatattatatttgagaatatttgttttaaaatagaagattgtaaatagatcattgacataccatattgagatgccggcgtgggcatggtaagacatttaaagtaatctaagaataaactgtaaatagacttccattacatgcaatgtattgaattgagaaataagatgagaattcacgaacttgttaccacaaaacttataaaatgcatacctatgccaataagtcatgggggattgaaaaccgcatattttgatggttcatagtggtacgtaagatataatgtatgcttagatgttcatatttattgactggtactggtactgacattttaatgttacaaacaatggaat…	>FBtr0080004 type=three_prime_UTR; loc=2L:10379171..10379905;MD5=2e250f23178669a1277bff7cb26c04f7; length=735; parent=FBgn0032233; release=r6.38; species=Dmel;	c(88, 167, 569)	-1	-1	-1	FBgn0032233	3	3	0	0	0	dpr19
FBtr0332191	aacttataatcgatggtatttggaatggagcaacttcaatcattcgaggatattatatttgagaatatttgttttaaaatagaagattgtaaatagatcattgacataccatattgagatgccggcgtgggcatggtaagacatttaaagtaatctaagaataaactgtaaatagacttccattacatgcaatgtattgaattgagaaataagatgagaattcacgaacttgttaccacaaaacttataaaatgcatacctatgccaataagtcatgggggattgaaaaccgcatattttgatggttcatagtggtacgtaagatataatgtatgcttagatgttcatatttattgactggtactggtactgacattttaatgttacaaacaatggaat…	>FBtr0332191 type=three_prime_UTR; loc=2L:10379171..10379905;MD5=2e250f23178669a1277bff7cb26c04f7; length=735; parent=FBgn0032233; release=r6.38; species=Dmel;	c(88, 167, 569)	-1	-1	-1	FBgn0032233	3	3	0	0	0	dpr19
FBtr0332192	aacttataatcgatggtatttggaatggagcaacttcaatcattcgaggatattatatttgagaatatttgttttaaaatagaagattgtaaatagatcattgacataccatattgagatgccggcgtgggcatggtaagacatttaaagtaatctaagaataaactgtaaatagacttccattacatgcaatgtattgaattgagaaataagatgagaattcacgaacttgttaccacaaaacttataaaatgcatacctatgccaataagtcatgggggattgaaaaccgcatattttgatggttcatagtggtacgtaagatataatgtatgcttagatgttcatatttattgactggtactggtactgacattttaatgttacaaacaatggaat…	>FBtr0332192 type=three_prime_UTR; loc=2L:10379171..10379905;MD5=2e250f23178669a1277bff7cb26c04f7; length=735; parent=FBgn0032233; release=r6.38; species=Dmel;	c(88, 167, 569)	-1	-1	-1	FBgn0032233	3	3	0	0	0	dpr19
FBtr0304952	actatacaaaacaaatatgtaggtcaggatatttttttttttaaatactacaagtatcttaagttattatcctattttatttataataaacctaatttgtgaaagcaagtgcatattgcactgcattctatacatacactaagtatttgcccacgttttaattattttgtacacaaaaatactgttctaaaaatcagttaaaatattcataaattctcgactacttttgttaaattttgagggctgttggagatttatacaatcgttcttttggcggtgccgcgctctttgccatagtaagtcttatctgttgaccacgcagagtcatcgtaaaataaaatctcgaatattagtagatagatgaaaaccagtaagcttgttataatatttgtactgtct…	>FBtr0304952 type=three_prime_UTR; loc=2L:10994085..10997897;MD5=28636761d0a343e7f889964fdca016db; length=3813; parent=FBgn0026147; release=r6.38; species=Dmel;	2768	3783	-1	1872	FBgn0026147	3	1	1	0	1	TTLL4A
FBtr0080580	aatcaaataattgcaaaggcaaaaagaaactcatttagggcacaagcagcttgaagaatgaaatcaaaccttggccaggcgaggaccaggataacgaggacgaagtgggacgtgcgagtggtccatacaactgcagtggttgaaaatcagatatagatatgtttatactagagcgtaaaatgaaaatcatgttagggacgagctggccagaagtgacagctgaagtgcagcaaataatgatagctacatccgacattcggcaacggatggggctttagaactaatcggaagtctaagaaaatttaatgtacctattcctttaatgaatgtattaaaaaatatatattttattacaaaaattatattcaaagcatttcatgttttttatggttttatata…	>FBtr0080580 type=three_prime_UTR; loc=2L:complement(13676860..13678353);MD5=0f526812efdd3e8b9a013740cb7e4f9c; length=1494; parent=FBgn0051814; release=r6.38; species=Dmel;	c(977, 1156)	-1	-1	1034	FBgn0051814	3	2	0	0	1	DIP-kappa
FBtr0343726	tgccgaattgatgatgaaatccattttcgaaagtagcttaaggtgctcgccaccgtgcaaaatagccagtatatggctcttttcctttcgcacccgaattgttgaagggcataattaatatacattcgtactcatactgattgcatcagccagctgcataaatcgatctggtcgtagctcttaagtgttgaacgcataaggtcagggaaagtgcagtatatatttaattattggcagagcaaagtcagcaagtagatattaaaccgatgaataataacaggaaatgaattaatcttaggtaaaatacaacatacggtgaaaccattaaataaaaagataccctgtacgccgctatctctcaaatctgttttcggcctactcacattttcgcaacagaat…	>FBtr0343726 type=three_prime_UTR; loc=2L:16039531..16041703;MD5=7a471ebb19bbc61f5f01675b7dcc10b9; length=2173; parent=FBgn0028644; release=r6.38; species=Dmel;	c(1204, 1609)	1894	-1	-1	FBgn0028644	3	2	1	0	0	beat-Ic
FBtr0343727	tgccgaattgatgatgaaatccattttcgaaagtagcttaaggtgctcgccaccgtgcaaaatagccagtatatggctcttttcctttcgcacccgaattgttgaagggcataattaatatacattcgtactcatactgattgcatcagccagctgcataaatcgatctggtcgtagctcttaagtgttgaacgcataaggtcagggaaagtgcagtatatatttaattattggcagagcaaagtcagcaagtagatattaaaccgatgaataataacaggaaatgaattaatcttaggtaaaatacaacatacggtgaaaccattaaataaaaagataccctgtacgccgctatctctcaaatctgttttcggcctactcacattttcgcaacagaat…	>FBtr0343727 type=three_prime_UTR; loc=2L:16039531..16041703;MD5=7a471ebb19bbc61f5f01675b7dcc10b9; length=2173; parent=FBgn0028644; release=r6.38; species=Dmel;	c(1204, 1609)	1894	-1	-1	FBgn0028644	3	2	1	0	0	beat-Ic
FBtr0081260	gtgcatttctcaatgggattgccaggtccacagagctaaaatctcatcgaccctgcgttcgttgcatacttatttcgaactctacgcataatacgcatttacgatatacacggatatcataactctaaagtattatagccagctactgcccacacttacttaatacacctatacttatatacgtggatatgtttagttgataagcgcacccccgcccgcaggttatgttaccattacgattctttgggggactcgatcttatatattgcgttctattttattgataatgtaaactaaagaagactgttacacgtttaattatcaaaaccttatatatcaacccacatgcacttctatgtacgagtatgtgcatcaagatttgctcgctaatggagaagg…	>FBtr0081260 type=three_prime_UTR; loc=2L:19730163..19731561;MD5=4b64fcc2c43d018f27af8dfdc0315b9b; length=1399; parent=FBgn0000464; release=r6.38; species=Dmel;	-1	-1	1095	c(960, 1212)	FBgn0000464	3	0	0	1	2	Lar
FBtr0112800	gtgcatttctcaatgggattgccaggtccacagagctaaaatctcatcgaccctgcgttcgttgcatacttatttcgaactctacgcataatacgcatttacgatatacacggatatcataactctaaagtattatagccagctactgcccacacttacttaatacacctatacttatatacgtggatatgtttagttgataagcgcacccccgcccgcaggttatgttaccattacgattctttgggggactcgatcttatatattgcgttctattttattgataatgtaaactaaagaagactgttacacgtttaattatcaaaaccttatatatcaacccacatgcacttctatgtacgagtatgtgcatcaagatttgctcgctaatggagaagg…	>FBtr0112800 type=three_prime_UTR; loc=2L:19730163..19732069;MD5=dcfbc116691585e731efb1eb4831ebb6; length=1907; parent=FBgn0000464; release=r6.38; species=Dmel;	-1	-1	1095	c(960, 1212)	FBgn0000464	3	0	0	1	2	Lar
FBtr0305950	gtgcatttctcaatgggattgccaggtccacagagctaaaatctcatcgaccctgcgttcgttgcatacttatttcgaactctacgcataatacgcatttacgatatacacggatatcataactctaaagtattatagccagctactgcccacacttacttaatacacctatacttatatacgtggatatgtttagttgataagcgcacccccgcccgcaggttatgttaccattacgattctttgggggactcgatcttatatattgcgttctattttattgataatgtaaactaaagaagactgttacacgtttaattatcaaaaccttatatatcaacccacatgcacttctatgtacgagtatgtgcatcaagatttgctcgctaatggagaagg…	>FBtr0305950 type=three_prime_UTR; loc=2L:19730163..19731561;MD5=4b64fcc2c43d018f27af8dfdc0315b9b; length=1399; parent=FBgn0000464; release=r6.38; species=Dmel;	-1	-1	1095	c(960, 1212)	FBgn0000464	3	0	0	1	2	Lar
FBtr0331239	gtgcatttctcaatgggattgccaggtccacagagctaaaatctcatcgaccctgcgttcgttgcatacttatttcgaactctacgcataatacgcatttacgatatacacggatatcataactctaaagtattatagccagctactgcccacacttacttaatacacctatacttatatacgtggatatgtttagttgataagcgcacccccgcccgcaggttatgttaccattacgattctttgggggactcgatcttatatattgcgttctattttattgataatgtaaactaaagaagactgttacacgtttaattatcaaaaccttatatatcaacccacatgcacttctatgtacgagtatgtgcatcaagatttgctcgctaatggagaagg…	>FBtr0331239 type=three_prime_UTR; loc=2L:19730163..19731561;MD5=4b64fcc2c43d018f27af8dfdc0315b9b; length=1399; parent=FBgn0000464; release=r6.38; species=Dmel;	-1	-1	1095	c(960, 1212)	FBgn0000464	3	0	0	1	2	Lar
FBtr0331240	gtgcatttctcaatgggattgccaggtccacagagctaaaatctcatcgaccctgcgttcgttgcatacttatttcgaactctacgcataatacgcatttacgatatacacggatatcataactctaaagtattatagccagctactgcccacacttacttaatacacctatacttatatacgtggatatgtttagttgataagcgcacccccgcccgcaggttatgttaccattacgattctttgggggactcgatcttatatattgcgttctattttattgataatgtaaactaaagaagactgttacacgtttaattatcaaaaccttatatatcaacccacatgcacttctatgtacgagtatgtgcatcaagatttgctcgctaatggagaagg…	>FBtr0331240 type=three_prime_UTR; loc=2L:19730163..19731561;MD5=4b64fcc2c43d018f27af8dfdc0315b9b; length=1399; parent=FBgn0000464; release=r6.38; species=Dmel;	-1	-1	1095	c(960, 1212)	FBgn0000464	3	0	0	1	2	Lar
FBtr0331241	gtgcatttctcaatgggattgccaggtccacagagctaaaatctcatcgaccctgcgttcgttgcatacttatttcgaactctacgcataatacgcatttacgatatacacggatatcataactctaaagtattatagccagctactgcccacacttacttaatacacctatacttatatacgtggatatgtttagttgataagcgcacccccgcccgcaggttatgttaccattacgattctttgggggactcgatcttatatattgcgttctattttattgataatgtaaactaaagaagactgttacacgtttaattatcaaaaccttatatatcaacccacatgcacttctatgtacgagtatgtgcatcaagatttgctcgctaatggagaagg…	>FBtr0331241 type=three_prime_UTR; loc=2L:19730163..19731561;MD5=4b64fcc2c43d018f27af8dfdc0315b9b; length=1399; parent=FBgn0000464; release=r6.38; species=Dmel;	-1	-1	1095	c(960, 1212)	FBgn0000464	3	0	0	1	2	Lar
FBtr0331242	gtgcatttctcaatgggattgccaggtccacagagctaaaatctcatcgaccctgcgttcgttgcatacttatttcgaactctacgcataatacgcatttacgatatacacggatatcataactctaaagtattatagccagctactgcccacacttacttaatacacctatacttatatacgtggatatgtttagttgataagcgcacccccgcccgcaggttatgttaccattacgattctttgggggactcgatcttatatattgcgttctattttattgataatgtaaactaaagaagactgttacacgtttaattatcaaaaccttatatatcaacccacatgcacttctatgtacgagtatgtgcatcaagatttgctcgctaatggagaagg…	>FBtr0331242 type=three_prime_UTR; loc=2L:19730163..19732069;MD5=dcfbc116691585e731efb1eb4831ebb6; length=1907; parent=FBgn0000464; release=r6.38; species=Dmel;	-1	-1	1095	c(960, 1212)	FBgn0000464	3	0	0	1	2	Lar
FBtr0339710	taatttttcattaactagagtaacgaatactactttgccccgatatttattattgttcagcatcacatattagcttaatgcttcggtgaaatcgcgcgaatttaacttttataacttagagttgagtaacttagagttttatggagcaaaacctctgtaaataaatcgaatttatcggtaaactaaagcgcgacttggactatcttcaatcaacaagccaaatatgtcgatgtgtgacagccgttctacgcgtcagctttcttcaatcaacattaccccgtgctgagatgtctggcctcaatgttaataatctcaatctacaatcaacattctcttctcttcaatcaacaatccgcaaacggatctaatcaacaatcaacatagcccttgccgccaacg…	>FBtr0339710 type=three_prime_UTR; loc=3R:complement(7931168..7935561);MD5=5d02955ec14b686017cbb70cd7eed2ef; length=4394; parent=FBgn0000504; release=r6.38; species=Dmel;	c(156, 1572)	-1	2305	-1	FBgn0000504	3	2	0	1	0	dsx
FBtr0302382	gagggagggggcgtggcacgggtcaacaggtcagcaggctggattccacttccatccgtggagtggaatggcgcacaagcaggtgagacgcatgacgggtgcagttttgttatgggtcgtaaattagagtacattttgggtgcggttcggccttgggaggcgaaattgacaattacagtagtccttcgagagggtgagcttagtcgcgaaatttaaaacaaacaaatattctttagactccaaatttcaaattctatattcatttttctaaaggtcaaacaaaattggtcgtaaaaacgttttaaaaagtactttctagaaacgatttctttccggcatttgtttgttttaagcatcgtatttgtatttgtctgaaacaaattgtttctccgtggtttg…	>FBtr0302382 type=three_prime_UTR; loc=3R:complement(join(9528334..9528953,9529254..9530821));MD5=a1d53fa4b24cd94759befeae01866737; length=2188; parent=FBgn0000244; release=r6.38; species=Dmel;	-1	758	-1	c(1109, 2035)	FBgn0000244	3	0	1	0	2	by
FBtr0082151	cacaaggacgacactgtggagagcaatttagggaatccctcgacgagtagcgacttctagcagaacctcatagcgagtcctgcggaactagccaaggataatctatttgttcttccaacatagtgtcggcccaagacgaacttcgaatggagatgaaaaaacggtggatcggtcgatgggtgatggccaaaaagaagtgaagatacgacgagcgaaactatcagtggttttagtgcacctagccgagcagaaatgaatcagattaatgagaaacaaaaggacatagacagacacacataaattaataattgatccaactgaataattcctaagattgattaaatttagttactttttagcgtaaatgatttttaaaccagccgaccgcggaggagaaac…	>FBtr0082151 type=three_prime_UTR; loc=3R:complement(9826081..9828725);MD5=55108ebc1ae544c7622fa44a9615aeb4; length=2645; parent=FBgn0037766; release=r6.38; species=Dmel;	-1	505	1822	1996	FBgn0037766	3	0	1	1	1	Teh1
FBtr0330082	cagaacctcatagcgagtcctgcggaactagccaaggataatctatttgttcttccaacatagtgtcggcccaagacgaacttcgaatggagatgaaaaaacggtggatcggtcgatgggtgatggccaaaaagaagtgaagatacgacgagcgaaactatcagtggttttagtgcacctagccgagcagaaatgaatcagattaatgagaaacaaaaggacatagacagacacacataaattaataattgatccaactgaataattcctaagattgattaaatttagttactttttagcgtaaatgatttttaaaccagccgaccgcggaggagaaaccaacagaagtgttaatcggttaatgaaatagatcgaagtctagttttaagctgtggcagt…	>FBtr0330082 type=three_prime_UTR; loc=3R:complement(9826081..9828665);MD5=072024b9fbdd56ae28e080c99a8e35fb; length=2585; parent=FBgn0037766; release=r6.38; species=Dmel;	-1	445	1762	1936	FBgn0037766	3	0	1	1	1	Teh1
FBtr0113214	cggccgcaaacaaacaatttgtaatttaagtgtaatgtccgagatttttacccagtttattagagaccatttatggtcggcaaataattcaattttttcattttttgatttgtcatagttaaatttttatttaaattattttgcatgtacttaatctcatttgcgcgataagtgttattaagataaatcttcaacaataagatcttttaagtaggccacgaaactgtttatattttgcttgttattattatgatgccggcccttcaaaaaatcggatataatttttatatgtaacttgttgatcatttatatttacaacttggcgctcaggcgattattaataataatattattagcagtgggcgctcatttgtgagttgcgtattaattgaatgtaag…	>FBtr0113214 type=three_prime_UTR; loc=3R:complement(9788852..9789429);MD5=cd52980a6d2897a3615fac6d0c3a1386; length=578; parent=FBgn0037755; release=r6.38; species=Dmel;	539	-1	-1	c(477, 500)	FBgn0037755	3	1	0	0	2	CG12945
FBtr0334685	cggccgcaaacaaacaatttgtaatttaagtgtaatgtccgagatttttacccagtttattagagaccatttatggtcggcaaataattcaattttttcattttttgatttgtcatagttaaatttttatttaaattattttgcatgtacttaatctcatttgcgcgataagtgttattaagataaatcttcaacaataagatcttttaagtaggccacgaaactgtttatattttgcttgttattattatgatgccggcccttcaaaaaatcggatataatttttatatgtaacttgttgatcatttatatttacaacttggcgctcaggcgattattaataataatattattagcagtgggcgctcatttgtgagttgcgtattaattgaatgtaag…	>FBtr0334685 type=three_prime_UTR; loc=3R:complement(9788852..9789429);MD5=cd52980a6d2897a3615fac6d0c3a1386; length=578; parent=FBgn0037755; release=r6.38; species=Dmel;	539	-1	-1	c(477, 500)	FBgn0037755	3	1	0	0	2	CG12945
FBtr0082549	gttgtcctcaggcaatcgcctagttacttggatcttacgcattaaaggaggctacgacttaagattttactcgatttaattacatattaacagagagagaataaggaagatacaccctcggcaaggcaatatatacaggactaagggcataagttaaagttataatcatactcgatttatgtttgtttcccatctgagtgtaaattgatattgagattcatgcttatgttccgccatatcatatagtttcattgaaaagttgcaagaattgtgtaaatagaatgcacagaattcgcccttaacagataagaacatttccattattttaatcaattggaatctgccatggttgtatcatatataagttaaataatcataaatgattcataagtcttgaga…	>FBtr0082549 type=three_prime_UTR; loc=3R:complement(12138833..12139819);MD5=5e70bb710c76e325231cf14cdeaad4fa; length=987; parent=FBgn0037993; release=r6.38; species=Dmel;	c(272, 524, 635)	-1	-1	-1	FBgn0037993	3	3	0	0	0	dpr15
FBtr0339647	gttgtcctcaggcaatcgcctagttacttggatcttacgcattaaaggaggctacgacttaagattttactcgatttaattacatattaacagagagagaataaggaagatacaccctcggcaaggcaatatatacaggactaagggcataagttaaagttataatcatactcgatttatgtttgtttcccatctgagtgtaaattgatattgagattcatgcttatgttccgccatatcatatagtttcattgaaaagttgcaagaattgtgtaaatagaatgcacagaattcgcccttaacagataagaacatttccattattttaatcaattggaatctgccatggttgtatcatatataagttaaataatcataaatgattcataagtcttgaga…	>FBtr0339647 type=three_prime_UTR; loc=3R:complement(12138833..12139819);MD5=5e70bb710c76e325231cf14cdeaad4fa; length=987; parent=FBgn0037993; release=r6.38; species=Dmel;	c(272, 524, 635)	-1	-1	-1	FBgn0037993	3	3	0	0	0	dpr15
FBtr0301654	acggcgatgtcgtcatctgcggacggcggtggaggattggcgggtaccgggaaaaacgaagtggcccacgaccttgccaaaaacgacttacaaatcgaaagtgataacaaggctctaatagtacttaaatacttatggtagattcgcaactgacgattaattgatcgttggattgattgacctgtgcgatagtttgtgtaggctccacccgcgacttggacacgccatgtgtgtgcatttacaatgtgaactagtgcataaatctatacaacatgtagtcggcctgatagagagactaaacctatattatatatacaacacttacaactagggcactatacaattgaatgtaaaccactgccacttccgagcgatagaatctagagtttatggaacggc…	>FBtr0301654 type=three_prime_UTR; loc=3R:complement(13667206..13668590);MD5=4e65d185f7b904479c0334c10b0c34d3; length=1385; parent=FBgn0038165; release=r6.38; species=Dmel;	-1	744	1096	1291	FBgn0038165	3	0	1	1	1	Task6
FBtr0334492	acggcgatgtcgtcatctgcggacggcggtggaggattggcgggtaccgggaaaaacgaagtggcccacgaccttgccaaaaacgacttacaaatcgaaagtgataacaaggctctaatagtacttaaatacttatggtagattcgcaactgacgattaattgatcgttggattgattgacctgtgcgatagtttgtgtaggctccacccgcgacttggacacgccatgtgtgtgcatttacaatgtgaactagtgcataaatctatacaacatgtagtcggcctgatagagagactaaacctatattatatatacaacacttacaactagggcactatacaattgaatgtaaaccactgccacttccgagcgatagaatctagagtttatggaacggc…	>FBtr0334492 type=three_prime_UTR; loc=3R:complement(13667046..13668590);MD5=43ea6f72595e9713802a8ac5a680d5b2; length=1545; parent=FBgn0038165; release=r6.38; species=Dmel;	-1	744	1096	1291	FBgn0038165	3	0	1	1	1	Task6
FBtr0334493	acggcgatgtcgtcatctgcggacggcggtggaggattggcgggtaccgggaaaaacgaagtggcccacgaccttgccaaaaacgacttacaaatcgaaagtgataacaaggctctaatagtacttaaatacttatggtagattcgcaactgacgattaattgatcgttggattgattgacctgtgcgatagtttgtgtaggctccacccgcgacttggacacgccatgtgtgtgcatttacaatgtgaactagtgcataaatctatacaacatgtagtcggcctgatagagagactaaacctatattatatatacaacacttacaactagggcactatacaattgaatgtaaaccactgccacttccgagcgatagaatctagagtttatggaacggc…	>FBtr0334493 type=three_prime_UTR; loc=3R:complement(13667046..13668590);MD5=43ea6f72595e9713802a8ac5a680d5b2; length=1545; parent=FBgn0038165; release=r6.38; species=Dmel;	-1	744	1096	1291	FBgn0038165	3	0	1	1	1	Task6
FBtr0334494	acggcgatgtcgtcatctgcggacggcggtggaggattggcgggtaccgggaaaaacgaagtggcccacgaccttgccaaaaacgacttacaaatcgaaagtgataacaaggctctaatagtacttaaatacttatggtagattcgcaactgacgattaattgatcgttggattgattgacctgtgcgatagtttgtgtaggctccacccgcgacttggacacgccatgtgtgtgcatttacaatgtgaactagtgcataaatctatacaacatgtagtcggcctgatagagagactaaacctatattatatatacaacacttacaactagggcactatacaattgaatgtaaaccactgccacttccgagcgatagaatctagagtttatggaacggc…	>FBtr0334494 type=three_prime_UTR; loc=3R:complement(13667046..13668590);MD5=43ea6f72595e9713802a8ac5a680d5b2; length=1545; parent=FBgn0038165; release=r6.38; species=Dmel;	-1	744	1096	1291	FBgn0038165	3	0	1	1	1	Task6
FBtr0308191	ccaaaatgctgtctgaatctcactggcggtggagccacatggctgccctgcggatgcggcggtctgcgcgtggacgacgatgacgatggagcgctgaccacgcgatatgttccatgagattcggtcacggcggccaccgccaccattgtggagaccgtggaggccgcgcagatggagacggagctgctgtaggccggcaaatgggttcctaaaaccaactcgatgtctcacagtttaaaccgtaagcaatcccagccctctaccctactgatccagtggatatggaaacctgtaagtattatcagcgcgtccccgagactaagcaatcaactatgcgtatacttaatcgcactagtatctagatgtaagtcccactagcaaaaagaatacaaatcggaa…	>FBtr0308191 type=three_prime_UTR; loc=3R:complement(14165379..14177919);MD5=727b92651e51d8bca1edcbc6c63ff51d; length=12541; parent=FBgn0011582; release=r6.38; species=Dmel;	11714	4363	-1	8037	FBgn0011582	3	1	1	0	1	Dop1R1
FBtr0302308	tggcagccccttcccgacggccatcaggagtcggcggcaggactgcaagcggaaatggcaaggccaccggaagcggaaacggaacaggaactggagcagtttacactgtattttatgacccttatatcggccttgtgaatgcatcgcaccaccagcagccccacattgaaaacctaaagcaaccaaatggagaagtctgcggcataaatccagcgaatctggacattagaacaatttgtacatagtataataaccaaatccgcacattgaccgattggattaactccacacacgacctaggtttgaattgatggcccaaaaaccccgaaaactgaatactaaaagtgcataaataaataaattgaacggcacgcaacgattctaaaaatatcacaaatt…	>FBtr0302308 type=three_prime_UTR; loc=3R:complement(join(18330932..18331806,18333276..18334299,18352725..18352833));MD5=d89d8768ebdb22068efa4ee77d06ea2c; length=2008; parent=FBgn0038606; release=r6.38; species=Dmel;	679	237	-1	1331	FBgn0038606	3	1	1	0	1	CG15803
FBtr0083739	ctccaaaaatccggaagggctcctgggaaatccggagaaatccgcatggaggagctgacagcacacacacaaagaaaagactgggttgggttcaaaatgtgagagagacgccaaaatgttgttgttgattgaagcagtttagtcgtcacgaaaaatgaaaaatctgtaacaggcataactcgtaaactccctaaaaaatttgtatagtaattagcaaagctgtgacccagccgtttcgatcgattgagacatcattgtatccagcaggaacatttttatagattttacaaaatgcaatcttaggaattattcaattgaaaactatacacttgaaatatacattttaaaaaatactgaaaattcttaaaaaaaaaaaaaaagcaaatgaaacactcgatc…	>FBtr0083739 type=three_prime_UTR; loc=3R:complement(19302731..19304827);MD5=666349ebd6d6c2de932d4891b8eea0dd; length=2097; parent=FBgn0000463; release=r6.38; species=Dmel;	698	1755	-1	835	FBgn0000463	3	1	1	0	1	Dl
FBtr0084095	gggacaacaagtggcaggaactacaagtagacacatgtgggcaccacctacgcgtgacaagccaaagcgctacgtatacatcactaattccccgaaaccaaatcccattatgatcatcgacatgtatacaagacacatctaagacttattgtatatttcgtgtagtatgtgtaaggcgaaatcgaaccacttcgcgctggtttggctgtatataatgtattgtttttttctttagtaatgatacacacttttgtttagttctaagtgcttaaaataaacgagattttgataattaagacacacaggagcacacaatatggaaaatggtttgcaatacagccttaggtcagcgctatttgtattaggcctagtaaaacgcgtctattactaaaagtagcg…	>FBtr0084095 type=three_prime_UTR; loc=3R:complement(21318300..21321053);MD5=f5bbe44ff96550c338a55d5dcd678cf8; length=2754; parent=FBgn0038881; release=r6.38; species=Dmel;	c(1532, 2409)	-1	-1	207	FBgn0038881	3	2	0	0	1	CG16791
FBtr0343807	gggacaacaagtggcaggaactacaagtagacacatgtgggcaccacctacgcgtgacaagccaaagcgctacgtatacatcactaattccccgaaaccaaatcccattatgatcatcgacatgtatacaagacacatctaagacttattgtatatttcgtgtagtatgtgtaaggcgaaatcgaaccacttcgcgctggtttggctgtatataatgtattgtttttttctttagtaatgatacacacttttgtttagttctaagtgcttaaaataaacgagattttgataattaagacacacaggagcacacaatatggaaaatggtttgcaatacagccttaggtcagcgctatttgtattaggcctagtaaaacgcgtctattactaaaagtagcg…	>FBtr0343807 type=three_prime_UTR; loc=3R:complement(21318300..21321053);MD5=f5bbe44ff96550c338a55d5dcd678cf8; length=2754; parent=FBgn0038881; release=r6.38; species=Dmel;	c(1532, 2409)	-1	-1	207	FBgn0038881	3	2	0	0	1	CG16791
FBtr0084111	tcggggcgccatcggcggacggagcctgaagtttggcgggagctggtttatttgtgatacacttcgctttgtacatagttcggatgaacggacagtttgcactgtactgtacataggaaagaggggcgtcgcctcgagcgcccactgtaaatacctagctttactctgtagtgacgcttacctaaccgatgccgggatgacgaggatttgcgatggtgaccccgaaacagcgctttaagtttgtgtagaatctggaatttccgttttgcgtttcgtagcggtgcatttaggatcttagttattgttcgacagtttcgacagttcggcagaagcaaaccgcatctcaaaacgtcgcagtgagcttggaagccacatttagtaataatatatttaatatac…	>FBtr0084111 type=three_prime_UTR; loc=3R:21512251..21512814;MD5=59f976c40e8d2d147f0a89cfaa125b4f; length=564; parent=FBgn0004863; release=r6.38; species=Dmel;	146	c(70, 108)	-1	-1	FBgn0004863	3	1	2	0	0	C15
FBtr0084337	gcagttgatgcggcagacgatcgggatcaggatcaaaatcaggagcagcacaagacaaggggaaacactcgcacttggagtaggaagttgacggggaagggcggtagcataaagtgtatagaactccagaagaagaagtatagaagattttattgtacacctaacctgtcaaaaccgagaaagcaagtgaatccagcccaaaactaagcaacaaagatgaatggagattgcaaaccaaaaagctgaacgaataacccatgtaaataatttttcaagagttttgtccacgattaaattagcacacacccactcacacatacagccggaaaatcgttaatggaaattgcaattggagactgcaaatccgaattcaaatccaccatccaccatcccaccccc…	>FBtr0084337 type=three_prime_UTR; loc=3R:22960102..22961731;MD5=dba17fee60fd09d4dec655ebf2328a9b; length=1630; parent=FBgn0017590; release=r6.38; species=Dmel;	c(259, 441, 1013)	-1	-1	-1	FBgn0017590	3	3	0	0	0	klg
FBtr0085441	gtggcggcccagttggtgggccacgatcgccaattgatgcgccaccaacgcccactgggccacagtgcccacgatcatcttcatcctggtaaccaaatagccgctggcggcggtcctcgagcggaaacccccaaaattttgctgtgatgttagcgcattttacgttacgatacttccaaatgttgtttcaaatgcacaccctgtaaataactatataagaagcggagaagaatttgcacccgattcgagcaatcgaaccttgtatatagcgagagcaaacaagcaagcagaaaaatgtttcctaattgtacataaatctagcaagtaaacccaatcaattcaattcaaaaccttcgttcgtttgtttcgcataaccaattgacaaaagaaacgaacggc…	>FBtr0085441 type=three_prime_UTR; loc=3R:29564491..29565244;MD5=7d1e823afda7052a860fde6d8357e086; length=754; parent=FBgn0000492; release=r6.38; species=Dmel;	202	307	-1	261	FBgn0000492	3	1	1	0	1	Dr
FBtr0085460	gggcagctctcccgttccagtttccaaaaccaaccaagtgaaagtgataagtcttaatgttagttatacaaattgtcgcataggtttacttgcataacactgccttaaacttgccgtttctgctgaaaatgtgaaataccacgcccactcacacgaacagacactccaccgcattccacacgcccattaatccccgaccaaggctcgccccagcacctcgaatgcatcgacacccactagggcacccaatccccacccactgatgccaccgcaatccaaaccgcagccgcactcaccgcactttgtaccttctactgtttactgtttgcattctattgcgtaaactgaaatttagccagtctgtatatgtagttccggtttccggatttgattgaactt…	>FBtr0085460 type=three_prime_UTR; loc=3R:29732667..29735360;MD5=63733ac489652abfec69c908012f032b; length=2694; parent=FBgn0039688; release=r6.38; species=Dmel;	-1	c(1195, 2112)	-1	2008	FBgn0039688	3	0	2	0	1	Kul
FBtr0339717	gggcagctctcccgttccagtttccaaaaccaaccaagtgaaagtgataagtcttaatgttagttatacaaattgtcgcataggtttacttgcataacactgccttaaacttgccgtttctgctgaaaatgtgaaataccacgcccactcacacgaacagacactccaccgcattccacacgcccattaatccccgaccaaggctcgccccagcacctcgaatgcatcgacacccactagggcacccaatccccacccactgatgccaccgcaatccaaaccgcagccgcactcaccgcactttgtaccttctactgtttactgtttgcattctattgcgtaaactgaaatttagccagtctgtatatgtagttccggtttccggatttgattgaactt…	>FBtr0339717 type=three_prime_UTR; loc=3R:29732667..29735360;MD5=63733ac489652abfec69c908012f032b; length=2694; parent=FBgn0039688; release=r6.38; species=Dmel;	-1	c(1195, 2112)	-1	2008	FBgn0039688	3	0	2	0	1	Kul
FBtr0339718	atccgtcaccattatacacagcgccaccacggagacagtgcgtcttccggagaacaacaacggcgtgatagtgcatacagccgtgaggacaaaggtacctttcaagaagaaggttcgtggcgaacgaaccaagaagccaggaacgggagcgggagtaacagccgctgctgcagttggaacccgaaatgcagccaaaagcagtgccaatccggagccaaagaagaccactaggagccaagcgatggccaagaagaaatcgttcgaggaggagcccaagaagtccagcaagaaggtgggcaaacacatgaaagagatcatcgactattcaaaccgcaacaacaatggcgacgatgcttccaatttgtcgaccaccaacaaccacaccaacacttttggcaa…	>FBtr0339718 type=three_prime_UTR; loc=3R:29730938..29735360;MD5=0621bcf9000a608737a59556b6828be2; length=4423; parent=FBgn0039688; release=r6.38; species=Dmel;	-1	c(2924, 3841)	-1	3737	FBgn0039688	3	0	2	0	1	Kul
FBtr0085821	tattatggtacccaggtgtaaataggtcaatagattcgtgtccccagagtccccgggaaacccttggcaatcgtttggttcatatcagtttgagaaacgagtgctctaaatgaacatatgtatatgtagcgacccacacaatctattgactgcatcacattcacatctgaagaacatagaacgaacaagaaatgcggacaggatcgatagggttttcatttttggggactaaactagcccattaaatgaaaatccatatgagactgtcgtgttacatcccaatcaaaattatagatttcgaaaatgttgagttaacagcgaggcgagcaaagacaacatttattttccattcggattgcactctcagactagataccgttacagaatatatttctaatt…	>FBtr0085821 type=three_prime_UTR; loc=3R:31661610..31664646;MD5=dfe7514dee6a0e6bd3a6ddd5e0d1ebb4; length=3037; parent=FBgn0039862; release=r6.38; species=Dmel;	17	c(825, 2061)	-1	-1	FBgn0039862	3	1	2	0	0	kek6
FBtr0343538	ggtaggaaaaatgctataaatacggttaggggcaaggaatatagatacaactacgattatacgcgtacaattggcgaaagttaaaaaaatctcaaagctagtcttccttatttaatctttcttagtctttcttagttcaccttcaccttttcggtctgcgaaaatggatcgtttaaaatatttgtgggcatcgaaaagcgatcaactgtcaactgctcgactgcagtgcccttgattaaactttatttcccactctatcaattttatcggaaaacatcaaggcgatcttaccctttcgccattgcattgctcgcgtactatcgtagttatgtaacaactaatgtcacacaatgctgaaagtgttcttttgaagtatttacagtttacaaatttacaaag…	>FBtr0343538 type=three_prime_UTR; loc=3R:31841770..31846570;MD5=814a8a55049ba3d6739ca727961c2981; length=4801; parent=FBgn0039883; release=r6.38; species=Dmel;	1420	-1	-1	c(797, 4340)	FBgn0039883	3	1	0	0	2	RhoGAP100F
FBtr0302181	ggtaggaaaaatgctataaatacggttaggggcaaggaatatagatacaactacgattatacgcgtacaattggcgaaagttaaaaaaatctcaaagctagtcttccttatttaatctttcttagtctttcttagttcaccttcaccttttcggtctgcgaaaatggatcgtttaaaatatttgtgggcatcgaaaagcgatcaactgtcaactgctcgactgcagtgcccttgattaaactttatttcccactctatcaattttatcggaaaacatcaaggcgatcttaccctttcgccattgcattgctcgcgtactatcgtagttatgtaacaactaatgtcacacaatgctgaaagtgttcttttgaagtatttacagtttacaaatttacaaag…	>FBtr0302181 type=three_prime_UTR; loc=3R:31841770..31846570;MD5=814a8a55049ba3d6739ca727961c2981; length=4801; parent=FBgn0039883; release=r6.38; species=Dmel;	1420	-1	-1	c(797, 4340)	FBgn0039883	3	1	0	0	2	RhoGAP100F
FBtr0304595	ggtaggaaaaatgctataaatacggttaggggcaaggaatatagatacaactacgattatacgcgtacaattggcgaaagttaaaaaaatctcaaagctagtcttccttatttaatctttcttagtctttcttagttcaccttcaccttttcggtctgcgaaaatggatcgtttaaaatatttgtgggcatcgaaaagcgatcaactgtcaactgctcgactgcagtgcccttgattaaactttatttcccactctatcaattttatcggaaaacatcaaggcgatcttaccctttcgccattgcattgctcgcgtactatcgtagttatgtaacaactaatgtcacacaatgctgaaagtgttcttttgaagtatttacagtttacaaatttacaaag…	>FBtr0304595 type=three_prime_UTR; loc=3R:31841770..31846570;MD5=814a8a55049ba3d6739ca727961c2981; length=4801; parent=FBgn0039883; release=r6.38; species=Dmel;	1420	-1	-1	c(797, 4340)	FBgn0039883	3	1	0	0	2	RhoGAP100F
FBtr0335289	ccatagatcttaaatctaagacacgccattaaatatcaaaattaatatatatgtaaatagcacatggatagatgtatgtacatagtatatagcacatagcgtctggtccacgtagtgacgaagcgtaccagaagaaggtgatatatacgaagaaatgaaaatttgcgatggttgtccgatcttagcttaatataacaatcgagaggtagctcacaaactaaagaggcggtaaaagtgtgaggctaaatattaaaaaaaaattagtctggggtcggaattgttaaaggaaaactattttcggtaaccagaacctgaaaatatgaaaaacttttttttattttggtcgattttttaagaacggtcatcgcatgtaaaatgttaaaccgtgtgcccttgaaa…	>FBtr0335289 type=three_prime_UTR; loc=2R:complement(6020311..6021344);MD5=91924faa83ae55cf20ba7ac2544059e1; length=1034; parent=FBgn0033051; release=r6.38; species=Dmel;	52	77	-1	596	FBgn0033051	3	1	1	0	1	Strica
FBtr0070987	tggaggatcgtataatcggttagcctggattcaggcaaatacgcccatttggagctggctctccggcagagcagcttggccgagcagccctaaaagctggccaggatcggcagaggaacacagacacatctacaaattatatatatatataaacatatatatatattgtatacagcctataagaaaaaagtttgagataaggaaaccagtccgaaaccagaaggattcttgaggacttgcaaatgaatgggcagcaggcactctaggattaaagccaggcaatttttttttttaagttaaaaattaacaagatgaagtaacgtaatgtaatcataaagtaaagtatttttataatgcatgcattatattcgtacgatatgtatacacacacgacacaaa…	>FBtr0070987 type=three_prime_UTR; loc=X:complement(6695866..6697328);MD5=8e0d13cfb8a94e609bca77df22ab06e6; length=1463; parent=FBgn0029894; release=r6.38; species=Dmel;	557	-1	-1	c(890, 1155)	FBgn0029894	3	1	0	0	2	CG14440
FBtr0071118	gacgcgttttgtttgtttgtttattttatacaactttttttttattagtatacatagaaatatgcaaatagaaatatatatatatatatatatatacatatatgtatatatatagatacgttgtttgaaaaacaaacagcaaactcactaaacacacaaaaaccgatgcagatgcagatacaagtgcagatacagatgcaaatacagattgcgactttagatacaagacccacaattttattatattatcgttttaaattaggtaactatagatacaaaaaaaaaaaatgaaaaaaacataaagccaaggggcggggcgggcgtggcttgagtcagagaagagaagattcgaacgagtaatgaactgtcgtgaaattgtaaaaatatgtattgcaaata…	>FBtr0071118 type=three_prime_UTR; loc=X:complement(8045436..8050146);MD5=7e85899a3a9b4330a41d97f32b03af17; length=4711; parent=FBgn0004656; release=r6.38; species=Dmel;	3298	-1	-1	c(103, 1488)	FBgn0004656	3	1	0	0	2	fs(1)h
FBtr0071120	gacgcgttttgtttgtttgtttattttatacaactttttttttattagtatacatagaaatatgcaaatagaaatatatatatatatatatatatacatatatgtatatatatagatacgttgtttgaaaaacaaacagcaaactcactaaacacacaaaaaccgatgcagatgcagatacaagtgcagatacagatgcaaatacagattgcgactttagatacaagacccacaattttattatattatcgttttaaattaggtaactatagatacaaaaaaaaaaaatgaaaaaaacataaagccaaggggcggggcgggcgtggcttgagtcagagaagagaagattcgaacgagtaatgaactgtcgtgaaattgtaaaaatatgtattgcaaata…	>FBtr0071120 type=three_prime_UTR; loc=X:complement(8045436..8050146);MD5=7e85899a3a9b4330a41d97f32b03af17; length=4711; parent=FBgn0004656; release=r6.38; species=Dmel;	3298	-1	-1	c(103, 1488)	FBgn0004656	3	1	0	0	2	fs(1)h
FBtr0071121	gacgcgttttgtttgtttgtttattttatacaactttttttttattagtatacatagaaatatgcaaatagaaatatatatatatatatatatatacatatatgtatatatatagatacgttgtttgaaaaacaaacagcaaactcactaaacacacaaaaaccgatgcagatgcagatacaagtgcagatacagatgcaaatacagattgcgactttagatacaagacccacaattttattatattatcgttttaaattaggtaactatagatacaaaaaaaaaaaatgaaaaaaacataaagccaaggggcggggcgggcgtggcttgagtcagagaagagaagattcgaacgagtaatgaactgtcgtgaaattgtaaaaatatgtattgcaaata…	>FBtr0071121 type=three_prime_UTR; loc=X:complement(8045436..8050146);MD5=7e85899a3a9b4330a41d97f32b03af17; length=4711; parent=FBgn0004656; release=r6.38; species=Dmel;	3298	-1	-1	c(103, 1488)	FBgn0004656	3	1	0	0	2	fs(1)h
FBtr0071122	gacgcgttttgtttgtttgtttattttatacaactttttttttattagtatacatagaaatatgcaaatagaaatatatatatatatatatatatacatatatgtatatatatagatacgttgtttgaaaaacaaacagcaaactcactaaacacacaaaaaccgatgcagatgcagatacaagtgcagatacagatgcaaatacagattgcgactttagatacaagacccacaattttattatattatcgttttaaattaggtaactatagatacaaaaaaaaaaaatgaaaaaaacataaagccaaggggcggggcgggcgtggcttgagtcagagaagagaagattcgaacgagtaatgaactgtcgtgaaattgtaaaaatatgtattgcaaata…	>FBtr0071122 type=three_prime_UTR; loc=X:complement(8045436..8050146);MD5=7e85899a3a9b4330a41d97f32b03af17; length=4711; parent=FBgn0004656; release=r6.38; species=Dmel;	3298	-1	-1	c(103, 1488)	FBgn0004656	3	1	0	0	2	fs(1)h
FBtr0333308	gacgcgttttgtttgtttgtttattttatacaactttttttttattagtatacatagaaatatgcaaatagaaatatatatatatatatatatatacatatatgtatatatatagatacgttgtttgaaaaacaaacagcaaactcactaaacacacaaaaaccgatgcagatgcagatacaagtgcagatacagatgcaaatacagattgcgactttagatacaagacccacaattttattatattatcgttttaaattaggtaactatagatacaaaaaaaaaaaatgaaaaaaacataaagccaaggggcggggcgggcgtggcttgagtcagagaagagaagattcgaacgagtaatgaactgtcgtgaaattgtaaaaatatgtattgcaaata…	>FBtr0333308 type=three_prime_UTR; loc=X:complement(8045436..8050146);MD5=7e85899a3a9b4330a41d97f32b03af17; length=4711; parent=FBgn0004656; release=r6.38; species=Dmel;	3298	-1	-1	c(103, 1488)	FBgn0004656	3	1	0	0	2	fs(1)h
FBtr0333309	gacgcgttttgtttgtttgtttattttatacaactttttttttattagtatacatagaaatatgcaaatagaaatatatatatatatatatatatacatatatgtatatatatagatacgttgtttgaaaaacaaacagcaaactcactaaacacacaaaaaccgatgcagatgcagatacaagtgcagatacagatgcaaatacagattgcgactttagatacaagacccacaattttattatattatcgttttaaattaggtaactatagatacaaaaaaaaaaaatgaaaaaaacataaagccaaggggcggggcgggcgtggcttgagtcagagaagagaagattcgaacgagtaatgaactgtcgtgaaattgtaaaaatatgtattgcaaata…	>FBtr0333309 type=three_prime_UTR; loc=X:complement(8045436..8050146);MD5=7e85899a3a9b4330a41d97f32b03af17; length=4711; parent=FBgn0004656; release=r6.38; species=Dmel;	3298	-1	-1	c(103, 1488)	FBgn0004656	3	1	0	0	2	fs(1)h
FBtr0087125	gttcgaccagtggcccgttttcaaatttactacgtttagatttggaaatttaccaacaaccgatgttcacgtatgtagattgtggctttgcaggagagtttgtgtttttggttcgacatttggcgcagatccgcagaaggatcggcagcaatttcgcaaacaacgtacttaggtttcggcaccaaagaaaaaaaagaagaaaacccacaagcaaacgcagcttcaaaccataagttctaagttaagattagcttgtagttcgtatggttaatgcccagttatagcatactcatatatatacgatgctgtgtagataatatcaagtccgaaagtgcgaaacacttgtcagttaatctatcgagaactccttgaaagaatgtttgcatatgccaatggaat…	>FBtr0087125 type=three_prime_UTR; loc=2R:complement(16558567..16559387);MD5=2361a9f8f469c1dee45597d8e698cc9e; length=821; parent=FBgn0034136; release=r6.38; species=Dmel;	-1	c(441, 702)	309	-1	FBgn0034136	3	0	2	1	0	DAT
FBtr0330002	atttggaaatttaccaacaaccgatgttcacgtatgtagattgtggctttgcaggagagtttgtgtttttggttcgacatttggcgcagatccgcagaaggatcggcagcaatttcgcaaacaacgtacttaggtttcggcaccaaagaaaaaaaagaagaaaacccacaagcaaacgcagcttcaaaccataagttctaagttaagattagcttgtagttcgtatggttaatgcccagttatagcatactcatatatatacgatgctgtgtagataatatcaagtccgaaagtgcgaaacacttgtcagttaatctatcgagaactccttgaaagaatgtttgcatatgccaatggaattaacgacacgatcgaggctcaaaattattgggcacataa…	>FBtr0330002 type=three_prime_UTR; loc=2R:complement(16558567..16559348);MD5=9a55dc8828f341858c85aeffac3ed9e4; length=782; parent=FBgn0034136; release=r6.38; species=Dmel;	-1	c(402, 663)	270	-1	FBgn0034136	3	0	2	1	0	DAT
FBtr0087367	aaagacattttgaatgatgttggaaacacatttaattaacaattactcaaacatatttataagtgtatgtaaatatatatgtatgtatatacacatagattctatgtatgtatatattaattcaaaaatcttgctataaggttaagctatcagtcaattaattaatttagcttcgcttataaacaaaaagaataggggaaggtaatgttaaataaatacgacttcgcacacgttggtctaaactaattgcgagcctaatgggcatacaaaccgatcgtttaaattaattatcgtgtagcctaatgttaatgttaaatacaaaagcctcttaagat	>FBtr0087367 type=three_prime_UTR; loc=2R:15223549..15223883;MD5=62dc86cf740b9caa681761f720c26b53; length=335; parent=FBgn0034002; release=r6.38; species=Dmel;	68	-1	-1	c(84, 109)	FBgn0034002	3	1	0	0	2	CG8079
FBtr0087368	aaagacattttgaatgatgttggaaacacatttaattaacaattactcaaacatatttataagtgtatgtaaatatatatgtatgtatatacacatagattctatgtatgtatatattaattcaaaaatcttgctataaggttaagctatcagtcaattaattaatttagcttcgcttataaacaaaaagaataggggaaggtaatgttaaataaatacgacttcgcacacgttggtctaaactaattgcgagcctaatgggcatac	>FBtr0087368 type=three_prime_UTR; loc=2R:15223549..15223815;MD5=aa6202c0ff59cfea462ac421769eaf5a; length=267; parent=FBgn0034002; release=r6.38; species=Dmel;	68	-1	-1	c(84, 109)	FBgn0034002	3	1	0	0	2	CG8079
FBtr0339993	aaagacattttgaatgatgttggaaacacatttaattaacaattactcaaacatatttataagtgtatgtaaatatatatgtatgtatatacacatagattctatgtatgtatatattaattcaaaaatcttgctataaggttaagctatcagtcaattaattaatttagcttcgcttataaacaaaaagaataggggaaggtaatgttaaataaatacgacttcgcacacgttggtctaaactaattgcgagcctaatgggcatacaaaccgatcgtttaaattaattatcgtgtagcctaatgttaatgttaaatacaaaagcctcttaagatatgtggtttctcttgcgatacatgctggataagatttgctgcaatacgtaatgttgtaaggttg…	>FBtr0339993 type=three_prime_UTR; loc=2R:15223549..15224795;MD5=ce90a25df0edd912d40d09db8124cc3b; length=1247; parent=FBgn0034002; release=r6.38; species=Dmel;	68	-1	-1	c(84, 109)	FBgn0034002	3	1	0	0	2	CG8079
FBtr0339994	gctgggaggcgtcattacggaccacgaaacgctgaagaagattaaggccgagaagcaaaaggccaaagatcaagctgaaaaatccaagcgcaaagccaagaaaaagaagagtaaaaagcacagcaagaagagatccaagaaggagcgccgtcacaagtccaagaagcgtcacaggcattctgatgatgagcggtctaatgatgccgaggagggcgagctgtcgcaaagcagcgactccagttccgactctagcaacgaggatagcagcagcaacacggaagacagcagtgttccagttttcaaggctgccggacgctttcaagacattgctaaaaagtatccaccctccctccgcatcattgtccaggagactaacgtagagtcgctgaaagtgggaag…	>FBtr0339994 type=three_prime_UTR; loc=2R:join(15222103..15222425,15222497..15222982,15223042..15223159,15223221..15223326,15223384..15223671);MD5=3f351191961b0eaf59406a5ebc85ed42; length=1321; parent=FBgn0034002; release=r6.38; species=Dmel;	1266	-1	-1	c(1282, 1307)	FBgn0034002	3	1	0	0	2	CG8079
FBtr0339995	gctgggaggcgtcattacggaccacgaaacgctgaagaagattaaggccgagaagcaaaaggccaaagatcaagctgaaaaatccaagcgcaaagccaagaaaaagaagagtaaaaagcacagcaagaagagatccaagaaggagcgccgtcacaagtccaagaagcgtcacaggcattctgatgatgagcggtctaatgatgccgaggagggcgagctgtcgcaaagcagcgactccagttccgactctagcaacgaggatagcagcagcaacacggaagacagcagtgttccagttttcaaggctgccggacgctttcaagacattgctaaaaagtatccaccctccctccgcatcattgtccaggagactaacgtagagtcgctgaaagtgggaag…	>FBtr0339995 type=three_prime_UTR; loc=2R:join(15222103..15222425,15222497..15222982,15223042..15223159,15223221..15223326,15223384..15223671);MD5=3f351191961b0eaf59406a5ebc85ed42; length=1321; parent=FBgn0034002; release=r6.38; species=Dmel;	1266	-1	-1	c(1282, 1307)	FBgn0034002	3	1	0	0	2	CG8079
FBtr0088139	gacgcggatggcagcggcagcaacagctaacatcgagcacaacccttgcaagtgcccaacggccctctgctcagtttggcatcaacgcaaacggaggcggaaacccaggcggtggccatatccatgcctttggcggacgcccacgtggccttgggccagctcctgcagcagcatcactgcagctgcaccgtttgtttggtgaacaagagcgagctggtctaaagccaatcagttagtatgtttttcagaagttcatacgcatacacaaaacccgcgcactcccacgaaaccttccaccttgttggtgtgaataaaatacgattttctgaaaagcttattcagaagcgaaatgtaaacatcagaaggggaatctgttagccagagtagaaagggccaaga…	>FBtr0088139 type=three_prime_UTR; loc=2R:11461814..11464030;MD5=b71f0f0826b5ffb2d723a2e33ec8e2aa; length=2217; parent=FBgn0000581; release=r6.38; species=Dmel;	c(732, 2111)	-1	-1	1913	FBgn0000581	3	2	0	0	1	E(Pc)
FBtr0088140	gacgcggatggcagcggcagcaacagctaacatcgagcacaacccttgcaagtgcccaacggccctctgctcagtttggcatcaacgcaaacggaggcggaaacccaggcggtggccatatccatgcctttggcggacgcccacgtggccttgggccagctcctgcagcagcatcactgcagctgcaccgtttgtttggtgaacaagagcgagctggtctaaagccaatcagttagtatgtttttcagaagttcatacgcatacacaaaacccgcgcactcccacgaaaccttccaccttgttggtgtgaataaaatacgattttctgaaaagcttattcagaagcgaaatgtaaacatcagaaggggaatctgttagccagagtagaaagggccaaga…	>FBtr0088140 type=three_prime_UTR; loc=2R:11461814..11464030;MD5=b71f0f0826b5ffb2d723a2e33ec8e2aa; length=2217; parent=FBgn0000581; release=r6.38; species=Dmel;	c(732, 2111)	-1	-1	1913	FBgn0000581	3	2	0	0	1	E(Pc)
FBtr0330622	catcgagcacaacccttgcaagtgcccaacggccctctgctcagtttggcatcaacgcaaacggaggcggaaacccaggcggtggccatatccatgcctttggcggacgcccacgtggccttgggccagctcctgcagcagcatcactgcagctgcaccgtttgtttggtgaacaagagcgagctggtctaaagccaatcagttagtatgtttttcagaagttcatacgcatacacaaaacccgcgcactcccacgaaaccttccaccttgttggtgtgaataaaatacgattttctgaaaagcttattcagaagcgaaatgtaaacatcagaaggggaatctgttagccagagtagaaagggccaagagagcgggatgaatatgagatattgtatagt…	>FBtr0330622 type=three_prime_UTR; loc=2R:11461844..11464030;MD5=e67445af58c5ad52d3831d7589cc82d0; length=2187; parent=FBgn0000581; release=r6.38; species=Dmel;	c(702, 2081)	-1	-1	1883	FBgn0000581	3	2	0	0	1	E(Pc)
FBtr0088447	ccggcacgagctgctggtagcagccactacaagccacatcacaacaacaacaccggctgcagcagcatcaacggcagcaacaccagctgcagcaccaacaacaccatcaccagcagcagcaacagtagcagcagcagcaacaagaagccggcggagtgcgacgacctggtcatgatgccgccaccgcctcgtaaggacataggtcgcagctcctacagcctcctgcagtccggctacgactgctatggccagcaactggcggtggcctacggagcgcagcagcatccgtagcccccgcgtcctccgtttccggaccagtgcaatagttgagagaggaaacaggaggcagttttgttttgttttcggattaagcgaacagtgacagtgtcatatctatag…	>FBtr0088447 type=three_prime_UTR; loc=2R:complement(9913496..9916745);MD5=217d295c8927f67ca5383172ff730f98; length=3250; parent=FBgn0011656; release=r6.38; species=Dmel;	-1	c(678, 1979, 2140)	-1	-1	FBgn0011656	3	0	3	0	0	Mef2
FBtr0088445	ccggcacgagctgctggtagcagccactacaagccacatcacaacaacaacaccggctgcagcagcatcaacggcagcaacaccagctgcagcaccaacaacaccatcaccagcagcagcaacagtagcagcagcagcaacaagaagccggcggagtgcgacgacctggtcatgatgccgccaccgcctcgtaaggacataggtcgcagctcctacagcctcctgcagtccggctacgactgctatggccagcaactggcggtggcctacggagcgcagcagcatccgtagcccccgcgtcctccgtttccggaccagtgcaatagttgagagaggaaacaggaggcagttttgttttgttttcggattaagcgaacagtgacagtgtcatatctatag…	>FBtr0088445 type=three_prime_UTR; loc=2R:complement(9913496..9916745);MD5=217d295c8927f67ca5383172ff730f98; length=3250; parent=FBgn0011656; release=r6.38; species=Dmel;	-1	c(678, 1979, 2140)	-1	-1	FBgn0011656	3	0	3	0	0	Mef2
FBtr0088658	ttgtggcttcagtttgacgagtagccctcgtgtcacgccccgtgggatcgggggcagacaaatagtagtaacctgtaacctggccccgcgttaccttaaatgtcctggcagcgcttgcgaagcagttccagaatccagaaacccgttaagaaattaaatacaaagaagttgtaaatattatgtgctaactcatccttaaagtttccaatgctttgctttgtttccgttcagaacgagctcgttataagttttgtgttacaccatcctcaactattgtacataaccttcgttgacattttcgctgagatttgcttgtttccgggcggagtgatcaaggcggcgcgccacaaaaaaactgccgcactgccattagagctaccaattagggcctagttatat…	>FBtr0088658 type=three_prime_UTR; loc=2R:8960460..8962796;MD5=dc4ae562e6b9c3e46b41f85caad80f6c; length=2337; parent=FBgn0011300; release=r6.38; species=Dmel;	c(170, 1682)	275	-1	-1	FBgn0011300	3	2	1	0	0	babo
FBtr0088659	ttgtggcttcagtttgacgagtagccctcgtgtcacgccccgtgggatcgggggcagacaaatagtagtaacctgtaacctggccccgcgttaccttaaatgtcctggcagcgcttgcgaagcagttccagaatccagaaacccgttaagaaattaaatacaaagaagttgtaaatattatgtgctaactcatccttaaagtttccaatgctttgctttgtttccgttcagaacgagctcgttataagttttgtgttacaccatcctcaactattgtacataaccttcgttgacattttcgctgagatttgcttgtttccgggcggagtgatcaaggcggcgcgccacaaaaaaactgccgcactgccattagagctaccaattagggcctagttatat…	>FBtr0088659 type=three_prime_UTR; loc=2R:8960460..8962796;MD5=dc4ae562e6b9c3e46b41f85caad80f6c; length=2337; parent=FBgn0011300; release=r6.38; species=Dmel;	c(170, 1682)	275	-1	-1	FBgn0011300	3	2	1	0	0	babo
FBtr0300599	ttgtggcttcagtttgacgagtagccctcgtgtcacgccccgtgggatcgggggcagacaaatagtagtaacctgtaacctggccccgcgttaccttaaatgtcctggcagcgcttgcgaagcagttccagaatccagaaacccgttaagaaattaaatacaaagaagttgtaaatattatgtgctaactcatccttaaagtttccaatgctttgctttgtttccgttcagaacgagctcgttataagttttgtgttacaccatcctcaactattgtacataaccttcgttgacattttcgctgagatttgcttgtttccgggcggagtgatcaaggcggcgcgccacaaaaaaactgccgcactgccattagagctaccaattagggcctagttatat…	>FBtr0300599 type=three_prime_UTR; loc=2R:8960460..8962796;MD5=dc4ae562e6b9c3e46b41f85caad80f6c; length=2337; parent=FBgn0011300; release=r6.38; species=Dmel;	c(170, 1682)	275	-1	-1	FBgn0011300	3	2	1	0	0	babo
FBtr0088936	atggcggccatcgttgctgtctaggacagctggcagccaccatagcatatacatacatatatatagttacacagatacatttgtgaagtttttatagattttatagaacgtattttattttcgtgataagtaatatttgtttacttgcgcataactttcgatgttgtcgtttatcgattgacttgccgcaagttttgttgaacattgtgtagcatacttttatgggagtggccgagtcgcccccgcccgaccgctcggtagcccaaaaaccaattagctaaaagataaatcggcagccccaaaaaaccagataattgtgtgaaacattcttatgaattgcatggaaattagttgattagttggcatcggcagaacaaaccttgttatttcgctataaat…	>FBtr0088936 type=three_prime_UTR; loc=2R:complement(7716807..7719261);MD5=7214a027f6338c4e166c005ff622e0e3; length=2455; parent=FBgn0042135; release=r6.38; species=Dmel;	-1	1646	906	2400	FBgn0042135	3	0	1	1	1	Gdap2
FBtr0333706	ttaaaaaaataggaatatgaatctgcaaccgatttaatcgcaactactcgaatacagcgacttgatgtaaatgtaaatcttttacgattttgcgtcccgccgcatctcagcaatatttatcaatctccggcattgccgattttactttaaggattttttagatcttatatacaataagataaccaaagactccgcctaatctaattattctagctttactttctaaaattacaaaatattacatatgatagtgtttacttaaattatatacgtaacatacagaaaagtacgatcccgaaacaattgtttgtacttaaatcatttaagcatactttattttactcacacacaaatattgcgaaacttactagtatataataaagttttaaaataataaaa…	>FBtr0333706 type=three_prime_UTR; loc=4:complement(540560..545662);MD5=99c0eba2707b94829eae1dcabe55113d; length=5103; parent=FBgn0026869; release=r6.38; species=Dmel;	-1	1744	-1	c(1583, 3087)	FBgn0026869	3	0	1	0	2	Tdg
FBtr0306057	cgcgagtcatggctggataactaagctaagccgagcggcaggcaatcggaatgtagtgcccgctaagcgccaccccatccagcatccgaaatgcagcaaacactgtccccatccacataccgaccaacatccgccaagccacgcaacacacacacacacacacacacacacactcacgcacgcacgcactcacgcagaaatcgaagccgaaggagttgaacagaagttaaggataatgcagaagctacacagaaacgcaagagaaaggagactcgaaattcccagaaacgcaggataaatccccatacaagagttgcaaagcaaaattgaagccatttcagaacacagaagccagaaggaaatcaccataaaatcgtaatatatataaatatatatatt…	>FBtr0306057 type=three_prime_UTR; loc=X:complement(18130392..18132795);MD5=5541d14090b545349f98cdf6d621d631; length=2404; parent=FBgn0017418; release=r6.38; species=Dmel;	-1	c(1130, 2054)	-1	1963	FBgn0017418	3	0	2	0	1	ari-1
FBtr0304603	gtggaggagttggcgctgccgacgctgccattgccgcatccactgggaatgccaccgcccatcagtccggccagcacctccaccacctgcagcaccgctaccaccaccaactccaggcccggcagcagccatccgaaggcgaagcgcaggccaaagctaaaaggctaaacctgcgcaggaaacacgactggatatgaccaactacccagcaaataaaatcgaggataaccaattcgacaaacagtatccacacacagggcagaaacttagacatagctgagagatttgcaatagcacacgagtcgaaaacgcgtttagaaaacacattgagcaaaatattttttcaaaaatttccaaaaactacacaactaaacacacacacaaaaatacaatttcaaa…	>FBtr0304603 type=three_prime_UTR; loc=3R:11392098..11407627;MD5=c6954e1afa0260c027349ede59b11ff7; length=15530; parent=FBgn0004595; release=r6.38; species=Dmel;	1398	4329	-1	13716	FBgn0004595	3	1	1	0	1	pros
FBtr0304604	gtggaggagttggcgctgccgacgctgccattgccgcatccactgggaatgccaccgcccatcagtccggccagcacctccaccacctgcagcaccgctaccaccaccaactccaggcccggcagcagccatccgaaggcgaagcgcaggccaaagctaaaaggctaaacctgcgcaggaaacacgactggatatgaccaactacccagcaaataaaatcgaggataaccaattcgacaaacagtatccacacacagggcagaaacttagacatagctgagagatttgcaatagcacacgagtcgaaaacgcgtttagaaaacacattgagcaaaatattttttcaaaaatttccaaaaactacacaactaaacacacacacaaaaatacaatttcaaa…	>FBtr0304604 type=three_prime_UTR; loc=3R:11392098..11407627;MD5=c6954e1afa0260c027349ede59b11ff7; length=15530; parent=FBgn0004595; release=r6.38; species=Dmel;	1398	4329	-1	13716	FBgn0004595	3	1	1	0	1	pros
FBtr0304608	gtggaggagttggcgctgccgacgctgccattgccgcatccactgggaatgccaccgcccatcagtccggccagcacctccaccacctgcagcaccgctaccaccaccaactccaggcccggcagcagccatccgaaggcgaagcgcaggccaaagctaaaaggctaaacctgcgcaggaaacacgactggatatgaccaactacccagcaaataaaatcgaggataaccaattcgacaaacagtatccacacacagggcagaaacttagacatagctgagagatttgcaatagcacacgagtcgaaaacgcgtttagaaaacacattgagcaaaatattttttcaaaaatttccaaaaactacacaactaaacacacacacaaaaatacaatttcaaa…	>FBtr0304608 type=three_prime_UTR; loc=3R:11392098..11407627;MD5=c6954e1afa0260c027349ede59b11ff7; length=15530; parent=FBgn0004595; release=r6.38; species=Dmel;	1398	4329	-1	13716	FBgn0004595	3	1	1	0	1	pros
FBtr0331182	tatgttgccgccggctgtggcattccctatgatcatgtggagctttccatggagctggcctgaccgatggatcagtccgctgatcccgttcaaaatctggcctggagattttaaagatacagagtcgacgcctggaggtatgagaacactaaatgaacctacattttaagccgataactttttctaaacgcttctgggagtaacaaattgcgcactagcgaagttgtgtgtatgtagtcataaggaaaatactgttattaagttgcgtatggtttttagtttgtatatataatttaattttaggcataaataatttgaaaatcgttgaaggagtcagaactgtgcacagaactttgtgcaagaactttttgaatgtagactttgtttcctatcattaat…	>FBtr0331182 type=three_prime_UTR; loc=3L:complement(19340321..19343216);MD5=229a664f19b7974a9b51f94eb027b22f; length=2896; parent=FBgn0052206; release=r6.38; species=Dmel;	c(1365, 2538)	-1	-1	282	FBgn0052206	3	2	0	0	1	CG32206
FBtr0089796	cacggactacagccggtcgaatatatccacgtggaccgggagaccaccgtgtgatatgttgccgccggctgtggcattccctatgatcatgtggagctttccatggagctggcctgaccgatggatcagtccgctgatcccgttcaaaatctggcctggagattttaaagatacagagtcgacgcctggaggtatgagaacactaaatgaacctacattttaagccgataactttttctaaacgcttctgggagtaacaaattgcgcactagcgaagttgtgtgtatgtagtcataaggaaaatactgttattaagttgcgtatggtttttagtttgtatatataatttaattttaggcataaataatttgaaaatcgttgaaggagtcagaactgtgc…	>FBtr0089796 type=three_prime_UTR; loc=3L:complement(19340321..19343270);MD5=63c669327fe7733411a23403b0c7af64; length=2950; parent=FBgn0052206; release=r6.38; species=Dmel;	c(1419, 2592)	-1	-1	336	FBgn0052206	3	2	0	0	1	CG32206
FBtr0080878	acacctggtcaggtgaggtggcgaggatttatttgatctcagagtgcaatcccaaacggcggcggctcttgagtgggtgatgaagtgaagtgaaaacgtgtacatacctaagatgaaaagttgaagttttgagaacgttgcaaacgttggagcggccattttgtacatagagaaaggacgtagtgaaaagatgcagaacttccgatatcccttattgagtgcttagatgcgatagcgagcagttgtaagcttatagtgacgttgtatatagcagccgatacgaaagactttttaatgaattgaaaaaacgataagctgaatacccgtgtaggcagagttggcatacctagcatttaacttccccgaaaagaaaccatttttagcattgcttataaacat…	>FBtr0080878 type=three_prime_UTR; loc=2L:complement(16466512..16467620);MD5=3d9ac10ebf4a6fac1fab1349e0658f4a; length=1109; parent=FBgn0005677; release=r6.38; species=Dmel;	-1	c(99, 162)	-1	263	FBgn0005677	3	0	2	0	1	dac
FBtr0080875	acacctggtcaggtgaggtggcgaggatttatttgatctcagagtgcaatcccaaacggcggcggctcttgagtgggtgatgaagtgaagtgaaaacgtgtacatacctaagatgaaaagttgaagttttgagaacgttgcaaacgttggagcggccattttgtacatagagaaaggacgtagtgaaaagatgcagaacttccgatatcccttattgagtgcttagatgcgatagcgagcagttgtaagcttatagtgacgttgtatatagcagccgatacgaaagactttttaatgaattgaaaaaacgataagctgaatacccgtgtaggcagagttggcatacctagcatttaacttccccgaaaagaaaccatttttagcattgcttataaacat…	>FBtr0080875 type=three_prime_UTR; loc=2L:complement(16466512..16467620);MD5=3d9ac10ebf4a6fac1fab1349e0658f4a; length=1109; parent=FBgn0005677; release=r6.38; species=Dmel;	-1	c(99, 162)	-1	263	FBgn0005677	3	0	2	0	1	dac
FBtr0080876	acacctggtcaggtgaggtggcgaggatttatttgatctcagagtgcaatcccaaacggcggcggctcttgagtgggtgatgaagtgaagtgaaaacgtgtacatacctaagatgaaaagttgaagttttgagaacgttgcaaacgttggagcggccattttgtacatagagaaaggacgtagtgaaaagatgcagaacttccgatatcccttattgagtgcttagatgcgatagcgagcagttgtaagcttatagtgacgttgtatatagcagccgatacgaaagactttttaatgaattgaaaaaacgataagctgaatacccgtgtaggcagagttggcatacctagcatttaacttccccgaaaagaaaccatttttagcattgcttataaacat…	>FBtr0080876 type=three_prime_UTR; loc=2L:complement(16466512..16467620);MD5=3d9ac10ebf4a6fac1fab1349e0658f4a; length=1109; parent=FBgn0005677; release=r6.38; species=Dmel;	-1	c(99, 162)	-1	263	FBgn0005677	3	0	2	0	1	dac
FBtr0100399	acacctggtcaggtgaggtggcgaggatttatttgatctcagagtgcaatcccaaacggcggcggctcttgagtgggtgatgaagtgaagtgaaaacgtgtacatacctaagatgaaaagttgaagttttgagaacgttgcaaacgttggagcggccattttgtacatagagaaaggacgtagtgaaaagatgcagaacttccgatatcccttattgagtgcttagatgcgatagcgagcagttgtaagcttatagtgacgttgtatatagcagccgatacgaaagactttttaatgaattgaaaaaacgataagctgaatacccgtgtaggcagagttggcatacctagcatttaacttccccgaaaagaaaccatttttagcattgcttataaacat…	>FBtr0100399 type=three_prime_UTR; loc=2L:complement(16466512..16467620);MD5=3d9ac10ebf4a6fac1fab1349e0658f4a; length=1109; parent=FBgn0005677; release=r6.38; species=Dmel;	-1	c(99, 162)	-1	263	FBgn0005677	3	0	2	0	1	dac
FBtr0100400	acacctggtcaggtgaggtggcgaggatttatttgatctcagagtgcaatcccaaacggcggcggctcttgagtgggtgatgaagtgaagtgaaaacgtgtacatacctaagatgaaaagttgaagttttgagaacgttgcaaacgttggagcggccattttgtacatagagaaaggacgtagtgaaaagatgcagaacttccgatatcccttattgagtgcttagatgcgatagcgagcagttgtaagcttatagtgacgttgtatatagcagccgatacgaaagactttttaatgaattgaaaaaacgataagctgaatacccgtgtaggcagagttggcatacctagcatttaacttccccgaaaagaaaccatttttagcattgcttataaacat…	>FBtr0100400 type=three_prime_UTR; loc=2L:complement(16466512..16467620);MD5=3d9ac10ebf4a6fac1fab1349e0658f4a; length=1109; parent=FBgn0005677; release=r6.38; species=Dmel;	-1	c(99, 162)	-1	263	FBgn0005677	3	0	2	0	1	dac
FBtr0080877	acacctggtcaggtgaggtggcgaggatttatttgatctcagagtgcaatcccaaacggcggcggctcttgagtgggtgatgaagtgaagtgaaaacgtgtacatacctaagatgaaaagttgaagttttgagaacgttgcaaacgttggagcggccattttgtacatagagaaaggacgtagtgaaaagatgcagaacttccgatatcccttattgagtgcttagatgcgatagcgagcagttgtaagcttatagtgacgttgtatatagcagccgatacgaaagactttttaatgaattgaaaaaacgataagctgaatacccgtgtaggcagagttggcatacctagcatttaacttccccgaaaagaaaccatttttagcattgcttataaacat…	>FBtr0080877 type=three_prime_UTR; loc=2L:complement(16466512..16467620);MD5=3d9ac10ebf4a6fac1fab1349e0658f4a; length=1109; parent=FBgn0005677; release=r6.38; species=Dmel;	-1	c(99, 162)	-1	263	FBgn0005677	3	0	2	0	1	dac
FBtr0305191	tagtcgtttatgacggcagcggcggcggttaacacggcagcggcagcggcggcaggagcggcacatgcgacattgggaacggcggcggcggcggcggcagcgacatcggcctgtctgggcgactattatctgtagttctctgtatcggaaactggttctgaaccgatccaaaccgataccgataccgatcccgatcctggtcctgctcctgatcctcgtacatacatgtagtattcttcgcaacggcagcaacacccccacaaccaccactaccaccaccaccaccaccatcatcatcacaaccacaagggcaaccacagcgataacgacaaccacaataaccacgacgatgaccacttctctctacgtctttcactcagtaatcaaccagcagcggcc…	>FBtr0305191 type=three_prime_UTR; loc=X:complement(join(15350239..15351958,15352334..15353105));MD5=0b05d2c2bda0c94ca60f539fad9a7200; length=2492; parent=FBgn0000028; release=r6.38; species=Dmel;	1297	1939	-1	1251	FBgn0000028	3	1	1	0	1	acj6
FBtr0100142	gaaaattgcggggtagcaaggcacttgaaaaatggtttcaaaattgcatttaatgactctaacggtagggcagcaagtttcccggacaaccagaccatccgtcgtcgacaaccacaagtggctaagagtatggagctgttgccagaaaaccaaaccagatccaggggataaaaaatcggtggggcggggcgaggaattacccgaaggggtggggggttgaaaattaaaaaaagcaaccgtgttttttgtgatataaatgaatatgaatagatagaaacgttaggaacgatagaatcgggtaaaagttgctagtgattgattggttaattgattgatccatcgattgattgttgttaactgcgtttttcgggatggctaacgtgttggagcattgaaact…	>FBtr0100142 type=three_prime_UTR; loc=X:complement(15510877..15512739);MD5=9e40409844a9b84dce19081ba901ada4; length=1863; parent=FBgn0022710; release=r6.38; species=Dmel;	-1	1490	-1	c(735, 1537)	FBgn0022710	3	0	1	0	2	Ac13E
FBtr0301532	gacgctgatgccactggctggcgctgctagagacgatccactgtacagagcgcacccactgtaacgcccgatcctcgctgtgtatatatgtatcctgtgtttgtgtttagtgtaaataggtcaacaagcattcgtgtgtgttaatgttatgtgttttgtgcacagtgtactgcctttagctgattcgaaataaggatgcaaacatgcatatagcaggttgtagcttttgtaaacttgtataagaatatattgaccaaaggaatgtatcagggttagtttataattgaatttatcttgatatttgctactgtttgttgacaataggatgttttttttttccaaattatggaatattcaaagttgtaaatagagtgaaattgattcagctgaaggcattat…	>FBtr0301532 type=three_prime_UTR; loc=X:13773983..13775189;MD5=e60b7ab87be265b522d24514faf6ba0e; length=1207; parent=FBgn0003218; release=r6.38; species=Dmel;	c(111, 362)	-1	-1	81	FBgn0003218	3	2	0	0	1	rdgB
FBtr0310287	atatggcgacaggctggcggcaaatggacgtaatacagccgttcaaagatcgccaccctaaccacgcccccgcccatacgccctcccgcccatgcgatctgttgttgtctctttctaaagcaaaaattgttcaaatcacagagcatttagactaaattttgtaatcttagcaagttcatagtttcttcagattttttttattgctctaccttttacaaattcttgtgtgttttcgtttttgttatagaagttttttttttgactaccatttttttttgattattaattttaaaccttagaccttatgtttttaggattttttttctgtgactttactgtgccccgcaattaaatgttggccatttaattattacttgattaactattacaatatgattt…	>FBtr0310287 type=three_prime_UTR; loc=X:complement(7682338..7685914);MD5=46585960835cac14b1f7a45a5e9c18cb; length=3577; parent=FBgn0029504; release=r6.38; species=Dmel;	-1	c(1445, 2606, 3189)	-1	-1	FBgn0029504	3	0	3	0	0	CHES-1-like
FBtr0304656	gatttgattacgattgtgtaagcaagcaaacaacaaccggcttaactagaacacaatacagaacaacactggggatatgggtcgcaaacaacgtgcagaagacaacagcaacagcaaaatcagcaacaaatgcgtcaccaactgcaccaaatgctgaaacttcaactacagatccactacgatccaccaacttgatggcttacacattcgacaagaaaagcgggaatttcaaacaaattgattgctaaatcaattaaacaaaccaacaaaaaatgaaatgataaatgataaacattcaagaaaaaggaattacacttaggcgcaaacgcatgtaacttttctacgagccatttgcatagatttactgaattccaccatatatcaattcagctagttagt…	>FBtr0304656 type=three_prime_UTR; loc=2R:complement(19517864..19530563);MD5=2d3f1f30b6f888621ddf13f0df88e3ca; length=12700; parent=FBgn0003435; release=r6.38; species=Dmel;	9438	9529	11274	-1	FBgn0003435	3	1	1	1	0	sm
FBtr0310331	gatttgattacgattgtgtaagcaagcaaacaacaaccggcttaactagaacacaatacagaacaacactggggatatgggtcgcaaacaacgtgcagaagacaacagcaacagcaaaatcagcaacaaatgcgtcaccaactgcaccaaatgctgaaacttcaactacagatccactacgatccaccaacttgatggcttacacattcgacaagaaaagcgggaatttcaaacaaattgattgctaaatcaattaaacaaaccaacaaaaaatgaaatgataaatgataaacattcaagaaaaaggaattacacttaggcgcaaacgcatgtaacttttctacgagccatttgcatagatttactgaattccaccatatatcaattcagctagttagt…	>FBtr0310331 type=three_prime_UTR; loc=2R:complement(19517864..19530563);MD5=2d3f1f30b6f888621ddf13f0df88e3ca; length=12700; parent=FBgn0003435; release=r6.38; species=Dmel;	9438	9529	11274	-1	FBgn0003435	3	1	1	1	0	sm
FBtr0308791	gatttgattacgattgtgtaagcaagcaaacaacaaccggcttaactagaacacaatacagaacaacactggggatatgggtcgcaaacaacgtgcagaagacaacagcaacagcaaaatcagcaacaaatgcgtcaccaactgcaccaaatgctgaaacttcaactacagatccactacgatccaccaacttgatggcttacacattcgacaagaaaagcgggaatttcaaacaaattgattgctaaatcaattaaacaaaccaacaaaaaatgaaatgataaatgataaacattcaagaaaaaggaattacacttaggcgcaaacgcatgtaacttttctacgagccatttgcatagatttactgaattccaccatatatcaattcagctagttagt…	>FBtr0308791 type=three_prime_UTR; loc=2R:complement(19517864..19530563);MD5=2d3f1f30b6f888621ddf13f0df88e3ca; length=12700; parent=FBgn0003435; release=r6.38; species=Dmel;	9438	9529	11274	-1	FBgn0003435	3	1	1	1	0	sm
FBtr0308797	gatttgattacgattgtgtaagcaagcaaacaacaaccggcttaactagaacacaatacagaacaacactggggatatgggtcgcaaacaacgtgcagaagacaacagcaacagcaaaatcagcaacaaatgcgtcaccaactgcaccaaatgctgaaacttcaactacagatccactacgatccaccaacttgatggcttacacattcgacaagaaaagcgggaatttcaaacaaattgattgctaaatcaattaaacaaaccaacaaaaaatgaaatgataaatgataaacattcaagaaaaaggaattacacttaggcgcaaacgcatgtaacttttctacgagccatttgcatagatttactgaattccaccatatatcaattcagctagttagt…	>FBtr0308797 type=three_prime_UTR; loc=2R:complement(19517864..19530563);MD5=2d3f1f30b6f888621ddf13f0df88e3ca; length=12700; parent=FBgn0003435; release=r6.38; species=Dmel;	9438	9529	11274	-1	FBgn0003435	3	1	1	1	0	sm
FBtr0075707	ccacctccagccgagccttcaatcattccaacgcaccaacgacaccatcatccacatttccaaaaaaacattaaaaaaaaaaacataacactcacaaaaacgatttgtaaataacaatcagcaaacaaacaaattccccgtgatctgatcgaatgatttgtgttcatttcctgtatcatttttaatttttccataattaattgctgccaaccagtggcaagaagtctagtagcggatccagcggttcaggcagtggggcactgagctccagtggcagtgtgccgcaggtccagacggttcaatccctgcacactttacagggtgtgcaagtcaagaaggatccggatgcccagcaacagcagcagcagcagcagcagcaacaacaacaacaacagcagc…	>FBtr0075707 type=three_prime_UTR; loc=3L:complement(join(14747929..14749737,14751267..14751775,14752699..14752905));MD5=8da3fd844eb79299ba07a3d2eaacbdfd; length=2525; parent=FBgn0013263; release=r6.38; species=Dmel;	106	1978	-1	2045	FBgn0013263	3	1	1	0	1	Trl
FBtr0089869	gaatcctgtccagcaagtgcatgcaaagacccaaccaagccaaaatgccatatcatcatgtaaataaagaaagccctgcggatttcccttctccgctcccacacggattgatctccttatctcgctagaacaccagtattcctgataaggcatttcatcatcatcatttcgtacgctccactttccttaatgcatgaagctcctattccgaccacaaccggtttcgcatgagcatggcctgcgtttcaatcaataagtacaattagccaactcttatgtaatccattaattgcctcgaagcccccaaagtttcacgcttcacgtgtcctgaaagtctctatttcgtacactttttggtgtactactttgataccctttgatacgattggataccctgaa…	>FBtr0089869 type=three_prime_UTR; loc=X:complement(6274972..6276223);MD5=5ce8bfa7314d99ce87b932debd2b0f8e; length=1252; parent=FBgn0029854; release=r6.38; species=Dmel;	59	c(642, 699)	-1	-1	FBgn0029854	3	1	2	0	0	CG3566
FBtr0077342	aagcaacatcgtcaacaacagcagcagcaactcctggctctggctagcgattagagccacaggaagtagctgagtgccgtatagtctagtgtagtgcaggatagtgtcgtgttagcaacagcgtttcaatagcgtgttgaagtttgttcacagttatctcactttcacacttttcccttttctgagtaaatatttattgtcttttaatgttttaatcgaatgtcacttgtacatagcatgtccaaaacacactacttaacaaccacttttgatttttttttgccttggcgttatatcataccatattttttgtgttattgcaactgctttcttttttaagttgttgatttaattttaggggaagttttttttacattacaatagttttatatgtgagcg…	>FBtr0077342 type=three_prime_UTR; loc=X:complement(22826162..22827046);MD5=1dfe526610a92152a95250c65ebdd2a9; length=885; parent=FBgn0000719; release=r6.38; species=Dmel;	-1	228	-1	c(581, 737)	FBgn0000719	3	0	1	0	2	fog
FBtr0100538	aagcaacatcgtcaacaacagcagcagcaactcctggctctggctagcgattagagccacaggaagtagctgagtgccgtatagtctagtgtagtgcaggatagtgtcgtgttagcaacagcgtttcaatagcgtgttgaagtttgttcacagttatctcactttcacacttttcccttttctgagtaaatatttattgtcttttaatgttttaatcgaatgtcacttgtacatagcatgtccaaaacacactacttaacaaccacttttgatttttttttgccttggcgttatatcataccatattttttgtgttattgcaactgctttcttttttaagttgttgatttaattttaggggaagttttttttacattacaatagttttatatgtgagcg…	>FBtr0100538 type=three_prime_UTR; loc=X:complement(22826162..22827046);MD5=1dfe526610a92152a95250c65ebdd2a9; length=885; parent=FBgn0000719; release=r6.38; species=Dmel;	-1	228	-1	c(581, 737)	FBgn0000719	3	0	1	0	2	fog
FBtr0333179	aagcaacatcgtcaacaacagcagcagcaactcctggctctggctagcgattagagccacaggaagtagctgagtgccgtatagtctagtgtagtgcaggatagtgtcgtgttagcaacagcgtttcaatagcgtgttgaagtttgttcacagttatctcactttcacacttttcccttttctgagtaaatatttattgtcttttaatgttttaatcgaatgtcacttgtacatagcatgtccaaaacacactacttaacaaccacttttgatttttttttgccttggcgttatatcataccatattttttgtgttattgcaactgctttcttttttaagttgttgatttaattttaggggaagttttttttacattacaatagttttatatgtgagcg…	>FBtr0333179 type=three_prime_UTR; loc=X:complement(22826162..22827046);MD5=1dfe526610a92152a95250c65ebdd2a9; length=885; parent=FBgn0000719; release=r6.38; species=Dmel;	-1	228	-1	c(581, 737)	FBgn0000719	3	0	1	0	2	fog
FBtr0333180	aagcaacatcgtcaacaacagcagcagcaactcctggctctggctagcgattagagccacaggaagtagctgagtgccgtatagtctagtgtagtgcaggatagtgtcgtgttagcaacagcgtttcaatagcgtgttgaagtttgttcacagttatctcactttcacacttttcccttttctgagtaaatatttattgtcttttaatgttttaatcgaatgtcacttgtacatagcatgtccaaaacacactacttaacaaccacttttgatttttttttgccttggcgttatatcataccatattttttgtgttattgcaactgctttcttttttaagttgttgatttaattttaggggaagttttttttacattacaatagttttatatgtgagcg…	>FBtr0333180 type=three_prime_UTR; loc=X:complement(22826162..22827046);MD5=1dfe526610a92152a95250c65ebdd2a9; length=885; parent=FBgn0000719; release=r6.38; species=Dmel;	-1	228	-1	c(581, 737)	FBgn0000719	3	0	1	0	2	fog
FBtr0333181	aagcaacatcgtcaacaacagcagcagcaactcctggctctggctagcgattagagccacaggaagtagctgagtgccgtatagtctagtgtagtgcaggatagtgtcgtgttagcaacagcgtttcaatagcgtgttgaagtttgttcacagttatctcactttcacacttttcccttttctgagtaaatatttattgtcttttaatgttttaatcgaatgtcacttgtacatagcatgtccaaaacacactacttaacaaccacttttgatttttttttgccttggcgttatatcataccatattttttgtgttattgcaactgctttcttttttaagttgttgatttaattttaggggaagttttttttacattacaatagttttatatgtgagcg…	>FBtr0333181 type=three_prime_UTR; loc=X:complement(22826162..22827046);MD5=1dfe526610a92152a95250c65ebdd2a9; length=885; parent=FBgn0000719; release=r6.38; species=Dmel;	-1	228	-1	c(581, 737)	FBgn0000719	3	0	1	0	2	fog
FBtr0333182	aagcaacatcgtcaacaacagcagcagcaactcctggctctggctagcgattagagccacaggaagtagctgagtgccgtatagtctagtgtagtgcaggatagtgtcgtgttagcaacagcgtttcaatagcgtgttgaagtttgttcacagttatctcactttcacacttttcccttttctgagtaaatatttattgtcttttaatgttttaatcgaatgtcacttgtacatagcatgtccaaaacacactacttaacaaccacttttgatttttttttgccttggcgttatatcataccatattttttgtgttattgcaactgctttcttttttaagttgttgatttaattttaggggaagttttttttacattacaatagttttatatgtgagcg…	>FBtr0333182 type=three_prime_UTR; loc=X:complement(22824317..22827046);MD5=c25c01551e7a1ab4b598676f91464fbe; length=2730; parent=FBgn0000719; release=r6.38; species=Dmel;	-1	228	-1	c(581, 737)	FBgn0000719	3	0	1	0	2	fog
FBtr0309090	agctaccacacccatacttacttctgagtgtacaaaaaaccaaatgatatagagtggcaaatgtattaatacatgagtatcgtaccgcatcgtatcgaataatatcctagcagctagacgtatttattcgcatggtttgaggaaagacttctcctagctcgtaagcatcttgtgtacttaatgcaatgccaaaagtgtaactgcaatacactcgttttgtaaataatcgttgtcatctgttgttgtaattaagccaagccagataaggaatatattctcgtggagagagagagagagagagcagtaaacgaaactacttctaaagaacatatcgtttaacgtttcacccacacacccatatccaatatccaatatccgaaatcccgatatcctggaacc…	>FBtr0309090 type=three_prime_UTR; loc=3R:13462762..13464184;MD5=cb39cedff41707f8faa815345aee9fd6; length=1423; parent=FBgn0038156; release=r6.38; species=Dmel;	218	798	-1	956	FBgn0038156	3	1	1	0	1	side-IV
FBtr0303259	agctaccacacccatacttacttctgagtgtacaaaaaaccaaatgatatagagtggcaaatgtattaatacatgagtatcgtaccgcatcgtatcgaataatatcctagcagctagacgtatttattcgcatggtttgaggaaagacttctcctagctcgtaagcatcttgtgtacttaatgcaatgccaaaagtgtaactgcaatacactcgttttgtaaataatcgttgtcatctgttgttgtaattaagccaagccagataaggaatatattctcgtggagagagagagagagagagcagtaaacgaaactacttctaaagaacatatcgtttaacgtttcacccacacacccatatccaatatccaatatccgaaatcccgatatcctggaacc…	>FBtr0303259 type=three_prime_UTR; loc=3R:13462762..13464184;MD5=cb39cedff41707f8faa815345aee9fd6; length=1423; parent=FBgn0038156; release=r6.38; species=Dmel;	218	798	-1	956	FBgn0038156	3	1	1	0	1	side-IV
FBtr0308028	ggtcaggttctgtggtgcggctcggcggttctatagtgcgaggggggcgggccgcagcacgaggcggggatgggcgtgggaatgggggcgggagtgggcgtgggactaagcatgggcatgggtatgggtatgggtatgggcatgggcgggggcatgaactgctttgggggcttctaatctgtacatagttgggggtcaagggcgagtccagctagttgattaccgattcgcagcgaacctttcaaaggggaatcaattgaaaaattccgatattagcgattttagtaatgagtatcaccgtatttccgcttgcaagatattctctttacgcaatgtgcattaatgctatcgcaactatcgatttcatatcgaaaaatcaacgatattacgtgcgaaaac…	>FBtr0308028 type=three_prime_UTR; loc=X:complement(20590252..20592161);MD5=d65906061e1014aa4c56db5827872289; length=1910; parent=FBgn0083981; release=r6.38; species=Dmel;	492	180	-1	593	FBgn0083981	3	1	1	0	1	RunxA
FBtr0331159	ggtcaggttctgtggtgcggctcggcggttctatagtgcgaggggggcgggccgcagcacgaggcggggatgggcgtgggaatgggggcgggagtgggcgtgggactaagcatgggcatgggtatgggtatgggtatgggcatgggcgggggcatgaactgctttgggggcttctaatctgtacatagttgggggtcaagggcgagtccagctagttgattaccgattcgcagcgaacctttcaaaggggaatcaattgaaaaattccgatattagcgattttagtaatgagtatcaccgtatttccgcttgcaagatattctctttacgcaatgtgcattaatgctatcgcaactatcgatttcatatcgaaaaatcaacgatattacgtgcgaaaac…	>FBtr0331159 type=three_prime_UTR; loc=X:complement(20590252..20592161);MD5=d65906061e1014aa4c56db5827872289; length=1910; parent=FBgn0083981; release=r6.38; species=Dmel;	492	180	-1	593	FBgn0083981	3	1	1	0	1	RunxA
FBtr0331160	tgcgaggggggcgggccgcagcacgaggcggggatgggcgtgggaatgggggcgggagtgggcgtgggactaagcatgggcatgggtatgggtatgggtatgggcatgggcgggggcatgaactgctttgggggcttctaatctgtacatagttgggggtcaagggcgagtccagctagttgattaccgattcgcagcgaacctttcaaaggggaatcaattgaaaaattccgatattagcgattttagtaatgagtatcaccgtatttccgcttgcaagatattctctttacgcaatgtgcattaatgctatcgcaactatcgatttcatatcgaaaaatcaacgatattacgtgcgaaaacggttataaaatgctctttcccttaacttaaaagcga…	>FBtr0331160 type=three_prime_UTR; loc=X:complement(20590252..20592125);MD5=44c0b1f735381c7ee4cd002db24334ff; length=1874; parent=FBgn0083981; release=r6.38; species=Dmel;	456	144	-1	557	FBgn0083981	3	1	1	0	1	RunxA
FBtr0301978	gctatacattaaacagagacagctcaaagattccccaattaaccacattgcatctcgaaaaaccctgtttgaaaatgttgacttaagttcaaggaaatcgcttgtttgccacaaaaaatgttcattgtgctaggagccacagaaatctgttgaattagcaaggtgtgtacaaaagagttctacattttgtctcttccatgatttctctgccttttctaagactcaataaagttatagactttatatttatatttataaattaaataattctggataattccgactgtaaattaaaatttagcactgcgtcaacattgtggcaggcaagtgacatatatatgtatatcacatatgtgtatatatatatgctctacaaatgaatatatattgtatataaat…	>FBtr0301978 type=three_prime_UTR; loc=X:23107331..23108331;MD5=06c809118d61a96bf8e5b18f88da9b3c; length=1001; parent=FBgn0039946; release=r6.38; species=Dmel;	-1	-1	-1	c(355, 389, 843)	FBgn0039946	3	0	0	0	3	ATbp
FBtr0479758	gcgaaatgagcacagagttgtgagaattagctaaatttaatttgcaatagccaaagcccgccgaccatgcccctgcagcaagagtaaactgctcctcgaacccgccgcccactgcattctgcaaactttggttgcagcaacagcagcagcagcagcaacagcagcagcaacagcagcagcagcaacagcaacaccagcaacaccaatcccagcagcagcaactctacgaacagcagcaggcttggctctagaaaagaataaacacgcacaacgtgtaagtggaaagttaaatggaaactacatgtgcgggttcaacatcaacaaagcaggagcaacaataaacaacatttaaaagccgctggggctgaagttggagcaaaacttttcaccagcacgttg…	>FBtr0479758 type=three_prime_UTR; loc=3R:31370249..31371748;MD5=b6b10b35cf439068d4506de707e16eae; length=1500; parent=FBgn0085376; release=r6.38; species=Dmel;	c(432, 1296)	-1	-1	448	FBgn0085376	3	2	0	0	1	CG34347
FBtr0479759	gcgaaatgagcacagagttgtgagaattagctaaatttaatttgcaatagccaaagcccgccgaccatgcccctgcagcaagagtaaactgctcctcgaacccgccgcccactgcattctgcaaactttggttgcagcaacagcagcagcagcagcaacagcagcagcaacagcagcagcagcaacagcaacaccagcaacaccaatcccagcagcagcaactctacgaacagcagcaggcttggctctagaaaagaataaacacgcacaacgtgtaagtggaaagttaaatggaaactacatgtgcgggttcaacatcaacaaagcaggagcaacaataaacaacatttaaaagccgctggggctgaagttggagcaaaacttttcaccagcacgttg…	>FBtr0479759 type=three_prime_UTR; loc=3R:31370249..31371748;MD5=b6b10b35cf439068d4506de707e16eae; length=1500; parent=FBgn0085376; release=r6.38; species=Dmel;	c(432, 1296)	-1	-1	448	FBgn0085376	3	2	0	0	1	CG34347
FBtr0479760	gaattagctaaatttaatttgcaatagccaaagcccgccgaccatgcccctgcagcaagagtaaactgctcctcgaacccgccgcccactgcattctgcaaactttggttgcagcaacagcagcagcagcagcaacagcagcagcaacagcagcagcagcaacagcaacaccagcaacaccaatcccagcagcagcaactctacgaacagcagcaggcttggctctagaaaagaataaacacgcacaacgtgtaagtggaaagttaaatggaaactacatgtgcgggttcaacatcaacaaagcaggagcaacaataaacaacatttaaaagccgctggggctgaagttggagcaaaacttttcaccagcacgttgcgtttgcaaattaaatgcacatt…	>FBtr0479760 type=three_prime_UTR; loc=3R:31370272..31371748;MD5=b2492e96e56cb1147a00f67a10680a3a; length=1477; parent=FBgn0085376; release=r6.38; species=Dmel;	c(409, 1273)	-1	-1	425	FBgn0085376	3	2	0	0	1	CG34347
FBtr0479761	aaaagaataaacacgcacaacgtgtaagtggaaagttaaatggaaactacatgtgcgggttcaacatcaacaaagcaggagcaacaataaacaacatttaaaagccgctggggctgaagttggagcaaaacttttcaccagcacgttgcgtttgcaaattaaatgcacattatgccgacatgtaaatagataatgctgtatataggcaagttgggacagggaaacttaatcgtaaagcgagcaggcccagtaatcttaagacgcgaataatcaaaaagccaaaaaagcaaatgtatctcacagataaacaacagcaatcgggggcctgtgggctgcaggatgaaagcaaaaagctgaaagtagcataaaagcaaaaataaattgtgcgttaatgataag…	>FBtr0479761 type=three_prime_UTR; loc=3R:31370500..31371748;MD5=2acad6966162645418ca6536c333ef8f; length=1249; parent=FBgn0085376; release=r6.38; species=Dmel;	c(181, 1045)	-1	-1	197	FBgn0085376	3	2	0	0	1	CG34347
FBtr0305292	ttgctttccaattcgacctgagttacgaatttcaccgccaatagcacagtaaagtgaatcgattgactttgatctgggatagtcgaacggagattggacagcaaggatacccaaggatacccaaggatatcgcggtcctgcacaacactcttagtcgtttatgatagcctaagcgatgatccacataggcataagcatttctcaatgttcgactcgaatttctcaagcaaatttagtgaattaatcaagaaacgcaaaacggaaccattcattatacatgtaacaatcaatgtaaaagagcatgcaactgttcaaactaggacccataaaacattcactacacccactcacagccacatttgccgaccattccagcactcaaaaataagtaaagaaaac…	>FBtr0305292 type=three_prime_UTR; loc=3R:complement(27767966..27769989);MD5=586cd49352c71200ae493130d8361e26; length=2024; parent=FBgn0085382; release=r6.38; species=Dmel;	c(925, 1080)	404	-1	-1	FBgn0085382	3	2	1	0	0	CG34353
FBtr0339321	ttgctttccaattcgacctgagttacgaatttcaccgccaatagcacagtaaagtgaatcgattgactttgatctgggatagtcgaacggagattggacagcaaggatacccaaggatacccaaggatatcgcggtcctgcacaacactcttagtcgtttatgatagcctaagcgatgatccacataggcataagcatttctcaatgttcgactcgaatttctcaagcaaatttagtgaattaatcaagaaacgcaaaacggaaccattcattatacatgtaacaatcaatgtaaaagagcatgcaactgttcaaactaggacccataaaacattcactacacccactcacagccacatttgccgaccattccagcactcaaaaataagtaaagaaaac…	>FBtr0339321 type=three_prime_UTR; loc=3R:complement(27767966..27769989);MD5=586cd49352c71200ae493130d8361e26; length=2024; parent=FBgn0085382; release=r6.38; species=Dmel;	c(925, 1080)	404	-1	-1	FBgn0085382	3	2	1	0	0	CG34353
FBtr0342859	tattgggagtattagaaacaatacaaaatgcaatttgtcgtctccatttaaaaaccatcgaattcaataacaaaaatgtcgaaagcaagaaaaagattaagaaaggacaattacaaccacaaaggaatctagagatcttcgcagcagccgcttcattaaaacttacaactcaacacaccgctaaaaaatctttaaaaaaaaaacgtatctcaaaaatacaaccaaaaaaactatcgtcagctcgcagtcagtcataaatcagcattatcaaccttggagactaagtctatcgatagtcggtacaaacacatccaaagccacaggacatagaatacaacatagaaaaatggaagcggaatgaaagcatggagaaatatggaaaaataggaaagcattaac…	>FBtr0342859 type=three_prime_UTR; loc=X:complement(20761071..20772580);MD5=a0591f9c972922904bd08329930cbc2a; length=11510; parent=FBgn0085387; release=r6.38; species=Dmel;	7777	5391	-1	5287	FBgn0085387	3	1	1	0	1	shakB
FBtr0309370	tattgggagtattagaaacaatacaaaatgcaatttgtcgtctccatttaaaaaccatcgaattcaataacaaaaatgtcgaaagcaagaaaaagattaagaaaggacaattacaaccacaaaggaatctagagatcttcgcagcagccgcttcattaaaacttacaactcaacacaccgctaaaaaatctttaaaaaaaaaacgtatctcaaaaatacaaccaaaaaaactatcgtcagctcgcagtcagtcataaatcagcattatcaaccttggagactaagtctatcgatagtcggtacaaacacatccaaagccacaggacatagaatacaacatagaaaaatggaagcggaatgaaagcatggagaaatatggaaaaataggaaagcattaac…	>FBtr0309370 type=three_prime_UTR; loc=X:complement(20761071..20772580);MD5=a0591f9c972922904bd08329930cbc2a; length=11510; parent=FBgn0085387; release=r6.38; species=Dmel;	7777	5391	-1	5287	FBgn0085387	3	1	1	0	1	shakB
FBtr0332598	ttgccggacattagctgggatttccacaactgaaacggacttaccaacttctgacagtactgcctaaaaaagctctaaaactgcggtaaaagtagggaaaaggattaaagttggaagatttttagagtatgtataatgtgaatgaatggtttaactgctgaatgcaactttatctggctaaaatttttagaaactttaaagccaaggtcaatcatacacaagccaatttcattgccattggtcacttaaactttccgtatctctattacttttattaaattcagctattgcagttattccaaagttctttatttctataatcttcttaaaaacatataaaagttaaggtcgtggaaagtaaatactttaagttcaagtgtcataggaattaagaatagc…	>FBtr0332598 type=three_prime_UTR; loc=2L:complement(9370309..9373024);MD5=ca8dbdf7cb79107a9beff4ee6160707f; length=2716; parent=FBgn0085395; release=r6.38; species=Dmel;	c(1363, 1486)	-1	-1	2457	FBgn0085395	3	2	0	0	1	Shawl
FBtr0335273	gcggacctgctggctgacgaggcgaacggaaggacggcaacaaggaaatcctatttaagctatttcagtgctaaaactacggcagccgaaacacagttaataactgaataaccccagtctaggataattgctaagctaagctcagtaagagatgcgcactcaagtgtaaaaatcatgttaaaccaatcgtcgctgtgtactcgacttgtttgtgtgccagacagttacccgtacatccatccacaccggtttggatgaaaattggttatgttaataaccttcttcccattgattttgtacagtatgtttaaggacttcagagtatgtgagtttctttttacgagttatcgctcggttagatttccacagactcctcatttaccgccatcgatgtaatgt…	>FBtr0335273 type=three_prime_UTR; loc=2R:5858643..5860831;MD5=c62f51321c87f47bd728bcbaf346d442; length=2189; parent=FBgn0085414; release=r6.38; species=Dmel;	c(852, 1853)	765	-1	-1	FBgn0085414	3	2	1	0	0	dpr12
FBtr0333160	caaagacttgactcctgcaatctgatgacggcagtggcaacagcaacattggcgacaacgacggcggcggcagggacatcggccacagctgagtgcaagacaacaacggtggctgcgagtagcagcagcaacaacagcgctggtaatcacaacaacatcggcaatagcagcagcagcggcgtcattaccaacaacaacagcagcagcaacggcggcaacatcaacatcgccatcagcgactcagtgaacggacacaaccatcatcatcaccaccatcaccacaggcatcatcatttgctggacacgccggctagcagctctgtgggattagcaacagctacagcagcaggaggaggagggacagcagcagcaatcccagtagcagccacaccggttagc…	>FBtr0333160 type=three_prime_UTR; loc=X:18878122..18884075;MD5=e36b3eabb3f64ccdda959d3bb785be32; length=5954; parent=FBgn0085430; release=r6.38; species=Dmel;	c(2939, 5110)	-1	-1	4045	FBgn0085430	3	2	0	0	1	CG34401
FBtr0330240	caaccttcggtctgagtgcgtattccttgccgattcctgagtgcatttgtgtcagaactcgtagtttcttaggcttaggcatggggcccgcctctttgttatcatagtcgataacctatatagttatatattaatcgctttatacgatatacatatatacacatatacagatacgaagctattcaaatttatacatgcaatatcagtttaaggacgaaatcaatattaactatgttaacaagaacgtgcattaaaccgttgtagtactcgaatctaatcaaaaatccgaatgagtcggaatcgccatcatcatggttaatgtcacaatcagaattgaggaagagcaaatttgtcggtagtttactgcccgatttagttgtagtcagaatgcctgaccca…	>FBtr0330240 type=three_prime_UTR; loc=2R:24918301..24920265;MD5=7e027c0e99c0d70a5a51d41052d948a5; length=1965; parent=FBgn0085434; release=r6.38; species=Dmel;	-1	c(639, 866, 1883)	-1	-1	FBgn0085434	3	0	3	0	0	NaCP60E
FBtr0308342	cctccggtcaacactcctctgcgggattcggagaaacgctccagccgtggcagccgcagtagtagcagcagcaccagcagcatcaggagctgctcgtcctcatcatcgtcgtcggcggcatcggcagccgcaccctcggcgcggcgtacaagctgacaaccttcggtctgagtgcgtattccttgccgattcctgagtgcatttgtgtcagaactcgtagtttcttaggcttaggcatggggcccgcctctttgttatcatagtcgataacctatatagttatatattaatcgctttatacgatatacatatatacacatatacagatacgaagctattcaaatttatacatgcaatatcagtttaaggacgaaatcaatattaactatgttaacaaga…	>FBtr0308342 type=three_prime_UTR; loc=2R:24918145..24920265;MD5=7cb7461cc7d1c524e51b706375071ab5; length=2121; parent=FBgn0085434; release=r6.38; species=Dmel;	-1	c(795, 1022, 2039)	-1	-1	FBgn0085434	3	0	3	0	0	NaCP60E
FBtr0308343	cctccggtcaacactcctctgcgggattcggagaaacgctccagccgtggcagccgcagtagtagcagcagcaccagcagcatcaggagctgctcgtcctcatcatcgtcgtcggcggcatcggcagccgcaccctcggcgcggcgtacaagctgacaaccttcggtctgagtgcgtattccttgccgattcctgagtgcatttgtgtcagaactcgtagtttcttaggcttaggcatggggcccgcctctttgttatcatagtcgataacctatatagttatatattaatcgctttatacgatatacatatatacacatatacagatacgaagctattcaaatttatacatgcaatatcagtttaaggacgaaatcaatattaactatgttaacaaga…	>FBtr0308343 type=three_prime_UTR; loc=2R:24918145..24920265;MD5=7cb7461cc7d1c524e51b706375071ab5; length=2121; parent=FBgn0085434; release=r6.38; species=Dmel;	-1	c(795, 1022, 2039)	-1	-1	FBgn0085434	3	0	3	0	0	NaCP60E
FBtr0308344	cctccggtcaacactcctctgcgggattcggagaaacgctccagccgtggcagccgcagtagtagcagcagcaccagcagcatcaggagctgctcgtcctcatcatcgtcgtcggcggcatcggcagccgcaccctcggcgcggcgtacaagctgacaaccttcggtctgagtgcgtattccttgccgattcctgagtgcatttgtgtcagaactcgtagtttcttaggcttaggcatggggcccgcctctttgttatcatagtcgataacctatatagttatatattaatcgctttatacgatatacatatatacacatatacagatacgaagctattcaaatttatacatgcaatatcagtttaaggacgaaatcaatattaactatgttaacaaga…	>FBtr0308344 type=three_prime_UTR; loc=2R:24918145..24920265;MD5=7cb7461cc7d1c524e51b706375071ab5; length=2121; parent=FBgn0085434; release=r6.38; species=Dmel;	-1	c(795, 1022, 2039)	-1	-1	FBgn0085434	3	0	3	0	0	NaCP60E
FBtr0308345	cctccggtcaacactcctctgcgggattcggagaaacgctccagccgtggcagccgcagtagtagcagcagcaccagcagcatcaggagctgctcgtcctcatcatcgtcgtcggcggcatcggcagccgcaccctcggcgcggcgtacaagctgacaaccttcggtctgagtgcgtattccttgccgattcctgagtgcatttgtgtcagaactcgtagtttcttaggcttaggcatggggcccgcctctttgttatcatagtcgataacctatatagttatatattaatcgctttatacgatatacatatatacacatatacagatacgaagctattcaaatttatacatgcaatatcagtttaaggacgaaatcaatattaactatgttaacaaga…	>FBtr0308345 type=three_prime_UTR; loc=2R:24918145..24921677;MD5=b2d2c752ea8f661735086678df697730; length=3533; parent=FBgn0085434; release=r6.38; species=Dmel;	-1	c(795, 1022, 2039)	-1	-1	FBgn0085434	3	0	3	0	0	NaCP60E
FBtr0308346	cctccggtcaacactcctctgcgggattcggagaaacgctccagccgtggcagccgcagtagtagcagcagcaccagcagcatcaggagctgctcgtcctcatcatcgtcgtcggcggcatcggcagccgcaccctcggcgcggcgtacaagctgacaaccttcggtctgagtgcgtattccttgccgattcctgagtgcatttgtgtcagaactcgtagtttcttaggcttaggcatggggcccgcctctttgttatcatagtcgataacctatatagttatatattaatcgctttatacgatatacatatatacacatatacagatacgaagctattcaaatttatacatgcaatatcagtttaaggacgaaatcaatattaactatgttaacaaga…	>FBtr0308346 type=three_prime_UTR; loc=2R:24918145..24920265;MD5=7cb7461cc7d1c524e51b706375071ab5; length=2121; parent=FBgn0085434; release=r6.38; species=Dmel;	-1	c(795, 1022, 2039)	-1	-1	FBgn0085434	3	0	3	0	0	NaCP60E
FBtr0308347	gcgcgcctctagtttcattcgcaagaaaccgcccctagaaagaggtttgtcagcacaaagcgctttaagagtaaacaagaacgcttttgtctctgaggcgtcagcccccgaggtgatcgtcaccaggccgtcgccagagcaacagacgcatccgcactcgctgagcctgcgtccggacaacgcaactctggtccacgtactggtacaccgcgagagcgaagagtataaggaggaggatgagagcagcccgtccgtgagcggcaacggaaatggttttggtgtcggcctggacatgcttagcaagcagccgccgcctcagatacgcatcacaacgggctcggtagagagctcaatggacacgtgcgcgatgcccacagttcagatcatggtggacagtcc…	>FBtr0308347 type=three_prime_UTR; loc=2R:join(24917486..24917577,24917648..24920265);MD5=392db1fb78b43e287212bf7d3ea47b91; length=2710; parent=FBgn0085434; release=r6.38; species=Dmel;	-1	c(1384, 1611, 2628)	-1	-1	FBgn0085434	3	0	3	0	0	NaCP60E
FBtr0333817	tgtcatttaatctacccatttctaagggtaataaaatacactgtctcgacattttgcacgcgctcgttaagcacgtgctaggtcatgtcgaggagaccgataacttcaaacagttgcaggaacaaatggatgtcaagttcaagaaacagtttccaacgcgcaaagaattggaaattgtttcgtcgacgcggatctggaagcgccaggaaaaggcggccaagaccattcaaacgggctggaaggaatatttgcggcgcaagcgggaaaaggaacgctccaattctggggacagcgccactcaaacctccagccctggtggatggcaatcaaaactttctgccctaaatttcttccaccttcaggtgagtcgtcgaggcactgcctgctccagtcgagcct…	>FBtr0333817 type=three_prime_UTR; loc=2R:join(24914757..24915009,24915114..24915222,24915281..24915462,24916772..24916890,24917320..24917577,24917648..24920265);MD5=f0a14a43f55b5a20150d7aa85943684d; length=3539; parent=FBgn0085434; release=r6.38; species=Dmel;	-1	c(2213, 2440, 3457)	-1	-1	FBgn0085434	3	0	3	0	0	NaCP60E
FBtr0332950	gggcatatcagatttatagtattttctaagtaattaaaccgaaaaacaaacgacaaacgagtaaacagtgacaagtagtctagttagtgtaagaccaaagtaaattactacatgcatccattaatgtatagaaatgatgagtactcccgctttgtttgtttttgttttgtttggtgcgcgtaaccagccgtttagtttttgatcccatcgaagtttcgtttatcgatcgttgtacatatattcggttggaatcaagagtaaaagtcagaagcatttagtggccacctaatcacaacccacccacgcgttctagcaagtgctgttatgaacaaatgtcctagttcttagttctaatttaatttctaaaatgtatacttagtagagattcatgtgggaatg…	>FBtr0332950 type=three_prime_UTR; loc=2R:6619254..6621792;MD5=cd6672cd40405778ebc2ea50c42b5b65; length=2539; parent=FBgn0086655; release=r6.38; species=Dmel;	2142	231	-1	825	FBgn0086655	3	1	1	0	1	jing
FBtr0089589	aacacctgcacaagaaccccagcgactctggactgaccaccgagctgcgaagcatgtcccaagtggcaggttccgcgatcagtaatgccacccaggtgatcgcggaagccaccaccagtttgatggaaacagcacgctcgtcagcctctcaggaatactctgatgtggagcaattcgagggactgcaatatgcgctcttctccaccagttttgtggaggtgctgggcggcattttcttcatattcaccgcctgctttatcatcaaagacaagtacaatgccacacgaggactgcaaggcgatcagggagcgcaggcggttcgatcgtcagtcgccttggccagcgggcaaaaggacgtcgagtccttcaactcggactgcctggtcctttgcactgaca…	>FBtr0089589 type=three_prime_UTR; loc=2R:join(16136206..16136360,16136425..16136566,16136834..16137029,16137205..16138238);MD5=71bd44af30f85530404a4c70bfa60225; length=1527; parent=FBgn0086676; release=r6.38; species=Dmel;	c(1063, 1146)	-1	824	-1	FBgn0086676	3	2	0	1	0	spin
FBtr0089590	tagctaaaaatatgaaatatgcattctggtgcgcggcaccaaatgattactttattttggcccagttcccgatgccacggctcagcaacagcagcgggatgagcgcggtcagattgcctaataccagccgattctggaggttatgctgcgcactcagagctccgatggcatgccgggtgaactgatactgactgaaaaccatctttaatttaatttacggtcactcgcaccacgcacatcccgcatcggatcgtactggaagcttacggggacggggacaccttgctcagttgggcggacaagttcccgatgttcatgttcctattggaagggatcggaggaaggaggaaaatgggggaaaggaccaccatgccaacacgttcaagcacgccacaccga…	>FBtr0089590 type=three_prime_UTR; loc=2R:join(16136959..16137029,16137205..16138238);MD5=8c90cbc857a8d42e65276806a3161b2f; length=1105; parent=FBgn0086676; release=r6.38; species=Dmel;	c(641, 724)	-1	402	-1	FBgn0086676	3	2	0	1	0	spin
FBtr0089591	taccagccgattctggaggttatgctgcgcactcagagctccgatggcatgccgggtgaactgatactgactgaaaaccatctttaatttaatttacggtcactcgcaccacgcacatcccgcatcggatcgtactggaagcttacggggacggggacaccttgctcagttgggcggacaagttcccgatgttcatgttcctattggaagggatcggaggaaggaggaaaatgggggaaaggaccaccatgccaacacgttcaagcacgccacaccgatttgtagatatatatacaaacaaaatcaaaaactctcacccaggcactcactcactcaccaagtcataacataacacagatcattttacttgtaaacgtcaaaggtcttgggtacccagga…	>FBtr0089591 type=three_prime_UTR; loc=2R:16137255..16138238;MD5=422a69510251200c7fb32cd227a26486; length=984; parent=FBgn0086676; release=r6.38; species=Dmel;	c(520, 603)	-1	281	-1	FBgn0086676	3	2	0	1	0	spin
FBtr0089592	tagctaaaaatatgaaatatgcattctggtgcgcggcaccaaatgattactttattttggcccagttcccgatgccacggctcagcaacagcagcgggatgagcgcggtcagattgcctaataccagccgattctggaggttatgctgcgcactcagagctccgatggcatgccgggtgaactgatactgactgaaaaccatctttaatttaatttacggtcactcgcaccacgcacatcccgcatcggatcgtactggaagcttacggggacggggacaccttgctcagttgggcggacaagttcccgatgttcatgttcctattggaagggatcggaggaaggaggaaaatgggggaaaggaccaccatgccaacacgttcaagcacgccacaccga…	>FBtr0089592 type=three_prime_UTR; loc=2R:join(16136959..16137029,16137205..16138238);MD5=8c90cbc857a8d42e65276806a3161b2f; length=1105; parent=FBgn0086676; release=r6.38; species=Dmel;	c(641, 724)	-1	402	-1	FBgn0086676	3	2	0	1	0	spin
FBtr0089593	taccagccgattctggaggttatgctgcgcactcagagctccgatggcatgccgggtgaactgatactgactgaaaaccatctttaatttaatttacggtcactcgcaccacgcacatcccgcatcggatcgtactggaagcttacggggacggggacaccttgctcagttgggcggacaagttcccgatgttcatgttcctattggaagggatcggaggaaggaggaaaatgggggaaaggaccaccatgccaacacgttcaagcacgccacaccgatttgtagatatatatacaaacaaaatcaaaaactctcacccaggcactcactcactcaccaagtcataacataacacagatcattttacttgtaaacgtcaaaggtcttgggtacccagga…	>FBtr0089593 type=three_prime_UTR; loc=2R:16137255..16138047;MD5=877a465fefdaa0e47244069076722e9a; length=793; parent=FBgn0086676; release=r6.38; species=Dmel;	c(520, 603)	-1	281	-1	FBgn0086676	3	2	0	1	0	spin
FBtr0299573	cacgggagcgtgctgccccatcaggcgatcggtatggtgtacatatcatgttcctcatgactccacgatcatcattgatcatccaactgacaactgactgcatccggagatcgggcgatttggatcattacaccgcatcatatcgcatctaactctcgcttcccaaatctcccgctctctatctgtctcgtatttgtgtttctccctctctctctctctctcacccactaactgtgctttgtatttgtgtgtatgtgtgtgatgcatgcattccaaattgccttactaacgaaaaaccaaaaaaacataaacataaccaggagcagcagcagctatacagcagcaggaggatcgcaaggatcgggagaggaaggctcaaagaggaagaccaatcgagag…	>FBtr0299573 type=three_prime_UTR; loc=2R:complement(22740999..22743871);MD5=7d3424e58b00ab980a82477403888a59; length=2873; parent=FBgn0259145; release=r6.38; species=Dmel;	872	c(38, 597)	-1	-1	FBgn0259145	3	1	2	0	0	CG42260
FBtr0330241	cacgggagcgtgctgccccatcaggcgatcggtatggtgtacatatcatgttcctcatgactccacgatcatcattgatcatccaactgacaactgactgcatccggagatcgggcgatttggatcattacaccgcatcatatcgcatctaactctcgcttcccaaatctcccgctctctatctgtctcgtatttgtgtttctccctctctctctctctctcacccactaactgtgctttgtatttgtgtgtatgtgtgtgatgcatgcattccaaattgccttactaacgaaaaaccaaaaaaacataaacataaccaggagcagcagcagctatacagcagcaggaggatcgcaaggatcgggagaggaaggctcaaagaggaagaccaatcgagag…	>FBtr0330241 type=three_prime_UTR; loc=2R:complement(22742980..22743871);MD5=d9882ac6605a8a4ac94b823c27602317; length=892; parent=FBgn0259145; release=r6.38; species=Dmel;	872	c(38, 597)	-1	-1	FBgn0259145	3	1	2	0	0	CG42260
FBtr0343091	ttatacaaacaagattatgatgcaagggtctcctgttcccgagtcccgctcctgccacacacacctggcacgggccaggaaacaaaggcattaatcaatggggatgccggggctaccacccaccacttcactgactaatcatctacgcctatgctaattgcaagtgggtggggcgtcaagacgggacagcgctaattgaatgcatattaaatcaaaagggaaaagagagaaaacctaaagtgtcgtagttaagtggaaaagaaaacgcgtttaaatgttacctcgttagtggaaaatgatggcaagggaaagcccaaatcccccccacaagtggacgtcaactataaaccatattacgattaaatggtgttcggctctttaaatggctttagctactat…	>FBtr0343091 type=three_prime_UTR; loc=X:complement(21422115..21424587);MD5=4693ff84e8c38a26defc9a5976a268e4; length=2473; parent=FBgn0259245; release=r6.38; species=Dmel;	699	2298	-1	615	FBgn0259245	3	1	1	0	1	DIP-beta
FBtr0299898	ttatacaaacaagattatgatgcaagggtctcctgttcccgagtcccgctcctgccacacacacctggcacgggccaggaaacaaaggcattaatcaatggggatgccggggctaccacccaccacttcactgactaatcatctacgcctatgctaattgcaagtgggtggggcgtcaagacgggacagcgctaattgaatgcatattaaatcaaaagggaaaagagagaaaacctaaagtgtcgtagttaagtggaaaagaaaacgcgtttaaatgttacctcgttagtggaaaatgatggcaagggaaagcccaaatcccccccacaagtggacgtcaactataaaccatattacgattaaatggtgttcggctctttaaatggctttagctactat…	>FBtr0299898 type=three_prime_UTR; loc=X:complement(21422115..21424587);MD5=4693ff84e8c38a26defc9a5976a268e4; length=2473; parent=FBgn0259245; release=r6.38; species=Dmel;	699	2298	-1	615	FBgn0259245	3	1	1	0	1	DIP-beta
FBtr0299901	ttatacaaacaagattatgatgcaagggtctcctgttcccgagtcccgctcctgccacacacacctggcacgggccaggaaacaaaggcattaatcaatggggatgccggggctaccacccaccacttcactgactaatcatctacgcctatgctaattgcaagtgggtggggcgtcaagacgggacagcgctaattgaatgcatattaaatcaaaagggaaaagagagaaaacctaaagtgtcgtagttaagtggaaaagaaaacgcgtttaaatgttacctcgttagtggaaaatgatggcaagggaaagcccaaatcccccccacaagtggacgtcaactataaaccatattacgattaaatggtgttcggctctttaaatggctttagctactat…	>FBtr0299901 type=three_prime_UTR; loc=X:complement(21422115..21424587);MD5=4693ff84e8c38a26defc9a5976a268e4; length=2473; parent=FBgn0259245; release=r6.38; species=Dmel;	699	2298	-1	615	FBgn0259245	3	1	1	0	1	DIP-beta
FBtr0307537	gcgaattgaattatttcggacaacccgcgaactcggcgctttggcaaggacaccaaggaaggatggaaggatacccataaatttgagcgctgtatgatggactaaccacatgcactccaaccaaaccaagcaatccaaataaccaatccctttcgatcatcatcttcatctgcacaaaggattccaggatctatagatctaaatgaacgttttttgttttgtttgtttgttttttgtattcttagtgcaatcaactagtttcgtgtcgaaagaaagacgaacccaagaaccccacatgaacgaaatcgaatctccttagcgtaaatttagcatatgtaactctttgtgtatctaaggatctaagtaagccagccaaatagctgtaccaatccgggcatt…	>FBtr0307537 type=three_prime_UTR; loc=X:complement(19766465..19769436);MD5=114b9c9574b29c3322579223c9a108f5; length=2972; parent=FBgn0259789; release=r6.38; species=Dmel;	2092	c(481, 2767)	-1	-1	FBgn0259789	3	1	2	0	0	zld
FBtr0310343	ataaagcccaatctgttcaagacggtggtcaacaagttgctgaaaaggaagccattgaagaagtagggccaggcctggttagctaagtttattattgtacggcgggagtatctattataatacgtacacatgcaaacatattatgtaaatgtaagtatttgaataattgagtgtatgcatatgtaaatattaaatgcttctcaagttcttgaagccgttgaatcaaacgaggcgcagtggtttattgctgaaaatatcaatttcaatttcaattgaaatgaaatgttatgaaaacggtctatgaatgctacaaaaatacatactttatctacagacgtacatacttatttacaaaaccaagtggctaacatggctaacgtggctaactagagtaacgag…	>FBtr0310343 type=three_prime_UTR; loc=X:18826454..18830406;MD5=317fd2964cf64f90218f8c2ef98aa2e1; length=3953; parent=FBgn0259927; release=r6.38; species=Dmel;	182	-1	-1	c(617, 625)	FBgn0259927	3	1	0	0	2	CG42450
FBtr0081843	gcggaataatgcctctagttatgtcattagttagtttttatttatggaagggcggtcaatatggagagaggcagggacaaactaaaatatcaaggacgactttagaaagattgcttgggaaagtaaaggtcttaagttcagcatttctctcatccttttaaaatcagttttcagttatgtatttcgattagataaggaatgtaagatcagattttactgcataatgtttatatgtctttttaaaacaacctactttcttatcacccaagcaatgttgcataatgattaaagaatattttcaaagaaatggatttcagacctatactttggcttgagccctcgcatataaatgttgtaagattgtcaactaaaatatagacccgccctcatatttatata…	>FBtr0081843 type=three_prime_UTR; loc=3R:8351706..8352817;MD5=8772f1f0d070571284bf46cd480c8fee; length=1112; parent=FBgn0261108; release=r6.38; species=Dmel;	451	743	-1	514	FBgn0261108	3	1	1	0	1	Atg13
FBtr0303082	tacaacctgatgtgggggcgccgactccgctcctccatgtcgaaaaacaagtggatatagaatacggccagcacacacagacacacccgtagagataagttctaggcagagcgaaagtattaggaacccaaccaaataaacccacccaccccaaaggctgtctgtggtgtgcgttcccggttaagtcacttcgagtcccattagattagtctcctacgtttaatagatcagtaggaagtggcgcgtgcttatcagtttatcgctaggaagtaggcttatattgtatattgcatgttttgcaaattagttgtaagctatgaacatgtcggctttgcacaaaggaagccgcggcaaattgtgttttgggaacaacaaatgtagttaaactattggataggg…	>FBtr0303082 type=three_prime_UTR; loc=2R:complement(10322904..10323780);MD5=a697ef1b2898448fee3c558f632ae9f8; length=877; parent=FBgn0261698; release=r6.38; species=Dmel;	-1	-1	-1	c(437, 512, 844)	FBgn0261698	3	0	0	0	3	SLO2
FBtr0303081	tacaacctgatgtgggggcgccgactccgctcctccatgtcgaaaaacaagtggatatagaatacggccagcacacacagacacacccgtagagataagttctaggcagagcgaaagtattaggaacccaaccaaataaacccacccaccccaaaggctgtctgtggtgtgcgttcccggttaagtcacttcgagtcccattagattagtctcctacgtttaatagatcagtaggaagtggcgcgtgcttatcagtttatcgctaggaagtaggcttatattgtatattgcatgttttgcaaattagttgtaagctatgaacatgtcggctttgcacaaaggaagccgcggcaaattgtgttttgggaacaacaaatgtagttaaactattggataggg…	>FBtr0303081 type=three_prime_UTR; loc=2R:complement(10322904..10323780);MD5=a697ef1b2898448fee3c558f632ae9f8; length=877; parent=FBgn0261698; release=r6.38; species=Dmel;	-1	-1	-1	c(437, 512, 844)	FBgn0261698	3	0	0	0	3	SLO2
FBtr0303080	tacaacctgatgtgggggcgccgactccgctcctccatgtcgaaaaacaagtggatatagaatacggccagcacacacagacacacccgtagagataagttctaggcagagcgaaagtattaggaacccaaccaaataaacccacccaccccaaaggctgtctgtggtgtgcgttcccggttaagtcacttcgagtcccattagattagtctcctacgtttaatagatcagtaggaagtggcgcgtgcttatcagtttatcgctaggaagtaggcttatattgtatattgcatgttttgcaaattagttgtaagctatgaacatgtcggctttgcacaaaggaagccgcggcaaattgtgttttgggaacaacaaatgtagttaaactattggataggg…	>FBtr0303080 type=three_prime_UTR; loc=2R:complement(10322904..10323780);MD5=a697ef1b2898448fee3c558f632ae9f8; length=877; parent=FBgn0261698; release=r6.38; species=Dmel;	-1	-1	-1	c(437, 512, 844)	FBgn0261698	3	0	0	0	3	SLO2
FBtr0303083	tacaacctgatgtgggggcgccgactccgctcctccatgtcgaaaaacaagtggatatagaatacggccagcacacacagacacacccgtagagataagttctaggcagagcgaaagtattaggaacccaaccaaataaacccacccaccccaaaggctgtctgtggtgtgcgttcccggttaagtcacttcgagtcccattagattagtctcctacgtttaatagatcagtaggaagtggcgcgtgcttatcagtttatcgctaggaagtaggcttatattgtatattgcatgttttgcaaattagttgtaagctatgaacatgtcggctttgcacaaaggaagccgcggcaaattgtgttttgggaacaacaaatgtagttaaactattggataggg…	>FBtr0303083 type=three_prime_UTR; loc=2R:complement(10322904..10323780);MD5=a697ef1b2898448fee3c558f632ae9f8; length=877; parent=FBgn0261698; release=r6.38; species=Dmel;	-1	-1	-1	c(437, 512, 844)	FBgn0261698	3	0	0	0	3	SLO2
FBtr0329869	gcagagcgaaagtattaggaacccaaccaaataaacccacccaccccaaaggctgtctgtggtgtgcgttcccggttaagtcacttcgagtcccattagattagtctcctacgtttaatagatcagtaggaagtggcgcgtgcttatcagtttatcgctaggaagtaggcttatattgtatattgcatgttttgcaaattagttgtaagctatgaacatgtcggctttgcacaaaggaagccgcggcaaattgtgttttgggaacaacaaatgtagttaaactattggataggggattggatatagaagatgattgagaaaactgtataactgtatatatcgaatgcctagttctaagccaggtgtagcaaactatcaaatagatcgggcttaaacgca…	>FBtr0329869 type=three_prime_UTR; loc=2R:complement(10322904..10323675);MD5=0cd5dae8668e79b4253c36af826a8e00; length=772; parent=FBgn0261698; release=r6.38; species=Dmel;	-1	-1	-1	c(332, 407, 739)	FBgn0261698	3	0	0	0	3	SLO2
FBtr0329872	tacaacctgatgtgggggcgccgactccgctcctccatgtcgaaaaacaagtggatatagaatacggccagcacacacagacacacccgtagagataagttctaggcagagcgaaagtattaggaacccaaccaaataaacccacccaccccaaaggctgtctgtggtgtgcgttcccggttaagtcacttcgagtcccattagattagtctcctacgtttaatagatcagtaggaagtggcgcgtgcttatcagtttatcgctaggaagtaggcttatattgtatattgcatgttttgcaaattagttgtaagctatgaacatgtcggctttgcacaaaggaagccgcggcaaattgtgttttgggaacaacaaatgtagttaaactattggataggg…	>FBtr0329872 type=three_prime_UTR; loc=2R:complement(10322195..10323780);MD5=f7e0c94b9a0f83bdfe4f357720c2f679; length=1586; parent=FBgn0261698; release=r6.38; species=Dmel;	-1	-1	-1	c(437, 512, 844)	FBgn0261698	3	0	0	0	3	SLO2
FBtr0329938	tacaacctgatgtgggggcgccgactccgctcctccatgtcgaaaaacaagtggatatagaatacggccagcacacacagacacacccgtagagataagttctaggcagagcgaaagtattaggaacccaaccaaataaacccacccaccccaaaggctgtctgtggtgtgcgttcccggttaagtcacttcgagtcccattagattagtctcctacgtttaatagatcagtaggaagtggcgcgtgcttatcagtttatcgctaggaagtaggcttatattgtatattgcatgttttgcaaattagttgtaagctatgaacatgtcggctttgcacaaaggaagccgcggcaaattgtgttttgggaacaacaaatgtagttaaactattggataggg…	>FBtr0329938 type=three_prime_UTR; loc=2R:complement(10322195..10323780);MD5=f7e0c94b9a0f83bdfe4f357720c2f679; length=1586; parent=FBgn0261698; release=r6.38; species=Dmel;	-1	-1	-1	c(437, 512, 844)	FBgn0261698	3	0	0	0	3	SLO2
FBtr0305946	tacaacctgatgtgggggcgccgactccgctcctccatgtcgaaaaacaagtggatatagaatacggccagcacacacagacacacccgtagagataagttctaggcagagcgaaagtattaggaacccaaccaaataaacccacccaccccaaaggctgtctgtggtgtgcgttcccggttaagtcacttcgagtcccattagattagtctcctacgtttaatagatcagtaggaagtggcgcgtgcttatcagtttatcgctaggaagtaggcttatattgtatattgcatgttttgcaaattagttgtaagctatgaacatgtcggctttgcacaaaggaagccgcggcaaattgtgttttgggaacaacaaatgtagttaaactattggataggg…	>FBtr0305946 type=three_prime_UTR; loc=2R:complement(10322904..10323780);MD5=a697ef1b2898448fee3c558f632ae9f8; length=877; parent=FBgn0261698; release=r6.38; species=Dmel;	-1	-1	-1	c(437, 512, 844)	FBgn0261698	3	0	0	0	3	SLO2
FBtr0330616	aatacggccagcacacacagacacacccgtagagataagttctaggcagagcgaaagtattaggaacccaaccaaataaacccacccaccccaaaggctgtctgtggtgtgcgttcccggttaagtcacttcgagtcccattagattagtctcctacgtttaatagatcagtaggaagtggcgcgtgcttatcagtttatcgctaggaagtaggcttatattgtatattgcatgttttgcaaattagttgtaagctatgaacatgtcggctttgcacaaaggaagccgcggcaaattgtgttttgggaacaacaaatgtagttaaactattggataggggattggatatagaagatgattgagaaaactgtataactgtatatatcgaatgcctagttc…	>FBtr0330616 type=three_prime_UTR; loc=2R:complement(10322904..10323720);MD5=c6b00fefd5ca53cf10d30ee12bb7bd78; length=817; parent=FBgn0261698; release=r6.38; species=Dmel;	-1	-1	-1	c(377, 452, 784)	FBgn0261698	3	0	0	0	3	SLO2
FBtr0339322	cagacgcccgttaaaccgggcaaactgaagacgaatacccacaagtgcgccagtgtggattttcaggattccactgctccggtgcggggcgttctgaaaagaagtgtggcagtggcaagtgacatataaatacggcaaaggccggtcatttcgcctgcggtccaccgcacaacgtgtcgtatacgcaatctcgaaaggacgataatgcccacccgcactccacaccacgcactccgcactgctcacacgtgtgtccttggggcttaaattcttatgtgcctctaattaatttcaaattcaatttgcatgccattgaaaacacatgtcccaggcgtaagaagtggggccaagtgaattagatattgaagtggagtcggatccccgcaggattgccaaggg…	>FBtr0339322 type=three_prime_UTR; loc=3R:8627022..8629996;MD5=330d119986c44506b54a9dc20f3789ad; length=2975; parent=FBgn0261929; release=r6.38; species=Dmel;	c(1798, 2393)	-1	-1	708	FBgn0261929	3	2	0	0	1	5-HT2B
FBtr0307302	aatacgatttcgagccaggcggggacggccactctgctccaggcagccgccgtaatggccgccagcgagccagcggaatccctgagcatatcagccatgcccgtctccgttccaatgggcatggcgcacagtttcctcatcaacaacttcgtaacggtggctgcaccgccggtggccacggtgaccagcacgggcctgcagtacttggacaagtcgtaggtccggacaccgagcccccaaattgatcgatacaggtattagagaaacggcagcaatctactgtatatatagcggaccgcttgtacggcacagtggcaatatatgcagcgatatatgccgacccaggatggcacagaagtggaatcggattcctgcgctgagctgagctgagctaagcga…	>FBtr0307302 type=three_prime_UTR; loc=3L:3153534..3154934;MD5=d77d73d9c7daa43524922bba7d158909; length=1401; parent=FBgn0263108; release=r6.38; species=Dmel;	-1	649	-1	c(281, 1258)	FBgn0263108	3	0	1	0	2	BtbVII
FBtr0307305	aatacgatttcgagccaggcggggacggccactctgctccaggcagccgccgtaatggccgccagcgagccagcggaatccctgagcatatcagccatgcccgtctccgttccaatgggcatggcgcacagtttcctcatcaacaacttcgtaacggtggctgcaccgccggtggccacggtgaccagcacgggcctgcagtacttggacaagtcgtaggtccggacaccgagcccccaaattgatcgatacaggtattagagaaacggcagcaatctactgtatatatagcggaccgcttgtacggcacagtggcaatatatgcagcgatatatgccgacccaggatggcacagaagtggaatcggattcctgcgctgagctgagctgagctaagcga…	>FBtr0307305 type=three_prime_UTR; loc=3L:3153534..3154934;MD5=d77d73d9c7daa43524922bba7d158909; length=1401; parent=FBgn0263108; release=r6.38; species=Dmel;	-1	649	-1	c(281, 1258)	FBgn0263108	3	0	1	0	2	BtbVII
FBtr0332096	aatacgatttcgagccaggcggggacggccactctgctccaggcagccgccgtaatggccgccagcgagccagcggaatccctgagcatatcagccatgcccgtctccgttccaatgggcatggcgcacagtttcctcatcaacaacttcgtaacggtggctgcaccgccggtggccacggtgaccagcacgggcctgcagtacttggacaagtcgtaggtccggacaccgagcccccaaattgatcgatacaggtattagagaaacggcagcaatctactgtatatatagcggaccgcttgtacggcacagtggcaatatatgcagcgatatatgccgacccaggatggcacagaagtggaatcggattcctgcgctgagctgagctgagctaagcga…	>FBtr0332096 type=three_prime_UTR; loc=3L:3153534..3154934;MD5=d77d73d9c7daa43524922bba7d158909; length=1401; parent=FBgn0263108; release=r6.38; species=Dmel;	-1	649	-1	c(281, 1258)	FBgn0263108	3	0	1	0	2	BtbVII
FBtr0307313	caaaggctttgattgcgatcgcgtaatcgaaaggatcagatctgggtatagcatcaggccatttgctcctctttgtcagcaccaaacttagatcacaattttgatacgatacgacacagctatcagatacccgaacatctgcaaaaccttccatacctttgtccaccagtacaccaacaccaacaccaacaccaaacccaaacccaaaaccaacgacaacaccaagatcagcacctatatcaaaggtatggcacgaacgtatcgacaccgaaactaggaacaactatatctgatatcaaattggctggagttagcttacaggaattaagcccgaatcgacaaccgcaatcgcaacagaagcaggagcaacaattgcatcaggatggatggctcagatgg…	>FBtr0307313 type=three_prime_UTR; loc=X:complement(11933705..11936044);MD5=a64d467097ef7da3bb3f03c434a12236; length=2340; parent=FBgn0263111; release=r6.38; species=Dmel;	-1	1374	c(1391, 1980)	-1	FBgn0263111	3	0	1	2	0	cac
FBtr0307314	caaaggctttgattgcgatcgcgtaatcgaaaggatcagatctgggtatagcatcaggccatttgctcctctttgtcagcaccaaacttagatcacaattttgatacgatacgacacagctatcagatacccgaacatctgcaaaaccttccatacctttgtccaccagtacaccaacaccaacaccaacaccaaacccaaacccaaaaccaacgacaacaccaagatcagcacctatatcaaaggtatggcacgaacgtatcgacaccgaaactaggaacaactatatctgatatcaaattggctggagttagcttacaggaattaagcccgaatcgacaaccgcaatcgcaacagaagcaggagcaacaattgcatcaggatggatggctcagatgg…	>FBtr0307314 type=three_prime_UTR; loc=X:complement(11933705..11936044);MD5=a64d467097ef7da3bb3f03c434a12236; length=2340; parent=FBgn0263111; release=r6.38; species=Dmel;	-1	1374	c(1391, 1980)	-1	FBgn0263111	3	0	1	2	0	cac
FBtr0307315	caaaggctttgattgcgatcgcgtaatcgaaaggatcagatctgggtatagcatcaggccatttgctcctctttgtcagcaccaaacttagatcacaattttgatacgatacgacacagctatcagatacccgaacatctgcaaaaccttccatacctttgtccaccagtacaccaacaccaacaccaacaccaaacccaaacccaaaaccaacgacaacaccaagatcagcacctatatcaaaggtatggcacgaacgtatcgacaccgaaactaggaacaactatatctgatatcaaattggctggagttagcttacaggaattaagcccgaatcgacaaccgcaatcgcaacagaagcaggagcaacaattgcatcaggatggatggctcagatgg…	>FBtr0307315 type=three_prime_UTR; loc=X:complement(11931280..11936044);MD5=52f43b760fd4ecf6f3dfc93c8f09e6e0; length=4765; parent=FBgn0263111; release=r6.38; species=Dmel;	-1	1374	c(1391, 1980)	-1	FBgn0263111	3	0	1	2	0	cac
FBtr0307316	caaaggctttgattgcgatcgcgtaatcgaaaggatcagatctgggtatagcatcaggccatttgctcctctttgtcagcaccaaacttagatcacaattttgatacgatacgacacagctatcagatacccgaacatctgcaaaaccttccatacctttgtccaccagtacaccaacaccaacaccaacaccaaacccaaacccaaaaccaacgacaacaccaagatcagcacctatatcaaaggtatggcacgaacgtatcgacaccgaaactaggaacaactatatctgatatcaaattggctggagttagcttacaggaattaagcccgaatcgacaaccgcaatcgcaacagaagcaggagcaacaattgcatcaggatggatggctcagatgg…	>FBtr0307316 type=three_prime_UTR; loc=X:complement(11933705..11936044);MD5=a64d467097ef7da3bb3f03c434a12236; length=2340; parent=FBgn0263111; release=r6.38; species=Dmel;	-1	1374	c(1391, 1980)	-1	FBgn0263111	3	0	1	2	0	cac
FBtr0307317	caaaggctttgattgcgatcgcgtaatcgaaaggatcagatctgggtatagcatcaggccatttgctcctctttgtcagcaccaaacttagatcacaattttgatacgatacgacacagctatcagatacccgaacatctgcaaaaccttccatacctttgtccaccagtacaccaacaccaacaccaacaccaaacccaaacccaaaaccaacgacaacaccaagatcagcacctatatcaaaggtatggcacgaacgtatcgacaccgaaactaggaacaactatatctgatatcaaattggctggagttagcttacaggaattaagcccgaatcgacaaccgcaatcgcaacagaagcaggagcaacaattgcatcaggatggatggctcagatgg…	>FBtr0307317 type=three_prime_UTR; loc=X:complement(11933705..11936044);MD5=a64d467097ef7da3bb3f03c434a12236; length=2340; parent=FBgn0263111; release=r6.38; species=Dmel;	-1	1374	c(1391, 1980)	-1	FBgn0263111	3	0	1	2	0	cac
FBtr0307318	caaaggctttgattgcgatcgcgtaatcgaaaggatcagatctgggtatagcatcaggccatttgctcctctttgtcagcaccaaacttagatcacaattttgatacgatacgacacagctatcagatacccgaacatctgcaaaaccttccatacctttgtccaccagtacaccaacaccaacaccaacaccaaacccaaacccaaaaccaacgacaacaccaagatcagcacctatatcaaaggtatggcacgaacgtatcgacaccgaaactaggaacaactatatctgatatcaaattggctggagttagcttacaggaattaagcccgaatcgacaaccgcaatcgcaacagaagcaggagcaacaattgcatcaggatggatggctcagatgg…	>FBtr0307318 type=three_prime_UTR; loc=X:complement(11933705..11936044);MD5=a64d467097ef7da3bb3f03c434a12236; length=2340; parent=FBgn0263111; release=r6.38; species=Dmel;	-1	1374	c(1391, 1980)	-1	FBgn0263111	3	0	1	2	0	cac
FBtr0307319	caaaggctttgattgcgatcgcgtaatcgaaaggatcagatctgggtatagcatcaggccatttgctcctctttgtcagcaccaaacttagatcacaattttgatacgatacgacacagctatcagatacccgaacatctgcaaaaccttccatacctttgtccaccagtacaccaacaccaacaccaacaccaaacccaaacccaaaaccaacgacaacaccaagatcagcacctatatcaaaggtatggcacgaacgtatcgacaccgaaactaggaacaactatatctgatatcaaattggctggagttagcttacaggaattaagcccgaatcgacaaccgcaatcgcaacagaagcaggagcaacaattgcatcaggatggatggctcagatgg…	>FBtr0307319 type=three_prime_UTR; loc=X:complement(11933705..11936044);MD5=a64d467097ef7da3bb3f03c434a12236; length=2340; parent=FBgn0263111; release=r6.38; species=Dmel;	-1	1374	c(1391, 1980)	-1	FBgn0263111	3	0	1	2	0	cac
FBtr0307320	caaaggctttgattgcgatcgcgtaatcgaaaggatcagatctgggtatagcatcaggccatttgctcctctttgtcagcaccaaacttagatcacaattttgatacgatacgacacagctatcagatacccgaacatctgcaaaaccttccatacctttgtccaccagtacaccaacaccaacaccaacaccaaacccaaacccaaaaccaacgacaacaccaagatcagcacctatatcaaaggtatggcacgaacgtatcgacaccgaaactaggaacaactatatctgatatcaaattggctggagttagcttacaggaattaagcccgaatcgacaaccgcaatcgcaacagaagcaggagcaacaattgcatcaggatggatggctcagatgg…	>FBtr0307320 type=three_prime_UTR; loc=X:complement(11931547..11936044);MD5=25017985b7c3a4d3a6c18e81ad7d07c4; length=4498; parent=FBgn0263111; release=r6.38; species=Dmel;	-1	1374	c(1391, 1980)	-1	FBgn0263111	3	0	1	2	0	cac
FBtr0307321	caaaggctttgattgcgatcgcgtaatcgaaaggatcagatctgggtatagcatcaggccatttgctcctctttgtcagcaccaaacttagatcacaattttgatacgatacgacacagctatcagatacccgaacatctgcaaaaccttccatacctttgtccaccagtacaccaacaccaacaccaacaccaaacccaaacccaaaaccaacgacaacaccaagatcagcacctatatcaaaggtatggcacgaacgtatcgacaccgaaactaggaacaactatatctgatatcaaattggctggagttagcttacaggaattaagcccgaatcgacaaccgcaatcgcaacagaagcaggagcaacaattgcatcaggatggatggctcagatgg…	>FBtr0307321 type=three_prime_UTR; loc=X:complement(11933705..11936044);MD5=a64d467097ef7da3bb3f03c434a12236; length=2340; parent=FBgn0263111; release=r6.38; species=Dmel;	-1	1374	c(1391, 1980)	-1	FBgn0263111	3	0	1	2	0	cac
FBtr0307322	caaaggctttgattgcgatcgcgtaatcgaaaggatcagatctgggtatagcatcaggccatttgctcctctttgtcagcaccaaacttagatcacaattttgatacgatacgacacagctatcagatacccgaacatctgcaaaaccttccatacctttgtccaccagtacaccaacaccaacaccaacaccaaacccaaacccaaaaccaacgacaacaccaagatcagcacctatatcaaaggtatggcacgaacgtatcgacaccgaaactaggaacaactatatctgatatcaaattggctggagttagcttacaggaattaagcccgaatcgacaaccgcaatcgcaacagaagcaggagcaacaattgcatcaggatggatggctcagatgg…	>FBtr0307322 type=three_prime_UTR; loc=X:complement(11933705..11936044);MD5=a64d467097ef7da3bb3f03c434a12236; length=2340; parent=FBgn0263111; release=r6.38; species=Dmel;	-1	1374	c(1391, 1980)	-1	FBgn0263111	3	0	1	2	0	cac
FBtr0307323	caaaggctttgattgcgatcgcgtaatcgaaaggatcagatctgggtatagcatcaggccatttgctcctctttgtcagcaccaaacttagatcacaattttgatacgatacgacacagctatcagatacccgaacatctgcaaaaccttccatacctttgtccaccagtacaccaacaccaacaccaacaccaaacccaaacccaaaaccaacgacaacaccaagatcagcacctatatcaaaggtatggcacgaacgtatcgacaccgaaactaggaacaactatatctgatatcaaattggctggagttagcttacaggaattaagcccgaatcgacaaccgcaatcgcaacagaagcaggagcaacaattgcatcaggatggatggctcagatgg…	>FBtr0307323 type=three_prime_UTR; loc=X:complement(11933705..11936044);MD5=a64d467097ef7da3bb3f03c434a12236; length=2340; parent=FBgn0263111; release=r6.38; species=Dmel;	-1	1374	c(1391, 1980)	-1	FBgn0263111	3	0	1	2	0	cac
FBtr0307324	caaaggctttgattgcgatcgcgtaatcgaaaggatcagatctgggtatagcatcaggccatttgctcctctttgtcagcaccaaacttagatcacaattttgatacgatacgacacagctatcagatacccgaacatctgcaaaaccttccatacctttgtccaccagtacaccaacaccaacaccaacaccaaacccaaacccaaaaccaacgacaacaccaagatcagcacctatatcaaaggtatggcacgaacgtatcgacaccgaaactaggaacaactatatctgatatcaaattggctggagttagcttacaggaattaagcccgaatcgacaaccgcaatcgcaacagaagcaggagcaacaattgcatcaggatggatggctcagatgg…	>FBtr0307324 type=three_prime_UTR; loc=X:complement(11933705..11936044);MD5=a64d467097ef7da3bb3f03c434a12236; length=2340; parent=FBgn0263111; release=r6.38; species=Dmel;	-1	1374	c(1391, 1980)	-1	FBgn0263111	3	0	1	2	0	cac
FBtr0307325	caaaggctttgattgcgatcgcgtaatcgaaaggatcagatctgggtatagcatcaggccatttgctcctctttgtcagcaccaaacttagatcacaattttgatacgatacgacacagctatcagatacccgaacatctgcaaaaccttccatacctttgtccaccagtacaccaacaccaacaccaacaccaaacccaaacccaaaaccaacgacaacaccaagatcagcacctatatcaaaggtatggcacgaacgtatcgacaccgaaactaggaacaactatatctgatatcaaattggctggagttagcttacaggaattaagcccgaatcgacaaccgcaatcgcaacagaagcaggagcaacaattgcatcaggatggatggctcagatgg…	>FBtr0307325 type=three_prime_UTR; loc=X:complement(11931852..11936044);MD5=0785502a57d3b1ba00bec7526ee83382; length=4193; parent=FBgn0263111; release=r6.38; species=Dmel;	-1	1374	c(1391, 1980)	-1	FBgn0263111	3	0	1	2	0	cac
FBtr0308609	caaaggctttgattgcgatcgcgtaatcgaaaggatcagatctgggtatagcatcaggccatttgctcctctttgtcagcaccaaacttagatcacaattttgatacgatacgacacagctatcagatacccgaacatctgcaaaaccttccatacctttgtccaccagtacaccaacaccaacaccaacaccaaacccaaacccaaaaccaacgacaacaccaagatcagcacctatatcaaaggtatggcacgaacgtatcgacaccgaaactaggaacaactatatctgatatcaaattggctggagttagcttacaggaattaagcccgaatcgacaaccgcaatcgcaacagaagcaggagcaacaattgcatcaggatggatggctcagatgg…	>FBtr0308609 type=three_prime_UTR; loc=X:complement(11933705..11936044);MD5=a64d467097ef7da3bb3f03c434a12236; length=2340; parent=FBgn0263111; release=r6.38; species=Dmel;	-1	1374	c(1391, 1980)	-1	FBgn0263111	3	0	1	2	0	cac
FBtr0332391	caaaggctttgattgcgatcgcgtaatcgaaaggatcagatctgggtatagcatcaggccatttgctcctctttgtcagcaccaaacttagatcacaattttgatacgatacgacacagctatcagatacccgaacatctgcaaaaccttccatacctttgtccaccagtacaccaacaccaacaccaacaccaaacccaaacccaaaaccaacgacaacaccaagatcagcacctatatcaaagcttacaggaattaagcccgaatcgacaaccgcaatcgcaacagaagcaggagcaacaattgcatcaggatggatggctcagatggtaccggcaatcgggtccatacggatccccagtgatggcatcattgccggagaccagagcaacatcgccc…	>FBtr0332391 type=three_prime_UTR; loc=X:complement(join(11933705..11935730,11935800..11936044));MD5=d7d6e44ee4d6de8ffd231351c92d7a36; length=2271; parent=FBgn0263111; release=r6.38; species=Dmel;	-1	1305	c(1322, 1911)	-1	FBgn0263111	3	0	1	2	0	cac
FBtr0474239	ttgcgatcgcgtaatcgaaaggatcagatctgggtatagcatcaggccatttgctcctctttgtcagcaccaaacttagatcacaattttgatacgatacgacacagctatcagatacccgaacatctgcaaaaccttccatacctttgtccaccagtacaccaacaccaacaccaacaccaaacccaaacccaaaaccaacgacaacaccaagatcagcacctatatcaaaggtatggcacgaacgtatcgacaccgaaactaggaacaactatatctgatatcaaattggctggagttagcttacaggaattaagcccgaatcgacaaccgcaatcgcaacagaagcaggagcaacaattgcatcaggatggatggctcagatggtaccggcaatcg…	>FBtr0474239 type=three_prime_UTR; loc=X:complement(11933705..11936032);MD5=0f335543bcea8ce05476cfa4ed1b2592; length=2328; parent=FBgn0263111; release=r6.38; species=Dmel;	-1	1362	c(1379, 1968)	-1	FBgn0263111	3	0	1	2	0	cac
FBtr0474240	catcaggccatttgctcctctttgtcagcaccaaacttagatcacaattttgatacgatacgacacagctatcagatacccgaacatctgcaaaaccttccatacctttgtccaccagtacaccaacaccaacaccaacaccaaacccaaacccaaaaccaacgacaacaccaagatcagcacctatatcaaaggtatggcacgaacgtatcgacaccgaaactaggaacaactatatctgatatcaaattggctggagttagcttacaggaattaagcccgaatcgacaaccgcaatcgcaacagaagcaggagcaacaattgcatcaggatggatggctcagatggtaccggcaatcgggtccatacggatccccagtgatggcatcattgccggag…	>FBtr0474240 type=three_prime_UTR; loc=X:complement(11933705..11935993);MD5=e6f84c18c5bf9ca1bafb83a4d31e8dab; length=2289; parent=FBgn0263111; release=r6.38; species=Dmel;	-1	1323	c(1340, 1929)	-1	FBgn0263111	3	0	1	2	0	cac
FBtr0474241	ggaggataggatcaagaacgagcaaccattatgcagacgccacaatccatagttcatagtccagaaactagtatccagaatctagaaactagaaaccagaaaccagaaaccagatccactaaaagtgcaactttaattgaaactcaaactgaaactgaaacgaggtgtaaagaatgtgagagtgattttattccacgcaattggattgggagtaaacgtggggagattgtaaacagattagagctactatttgcttagaaataggagtagacaacataattttagatatgaatatgatcaagtgtattgtactttttttttaatgtaagggcaagtctagacgaagagcacatcaaaatgaagctaacgataacagaactcttttcaagcagaacacac…	>FBtr0474241 type=three_prime_UTR; loc=X:complement(11933705..11935258);MD5=ca389fa9cc53edf19ffe0f9f3dee2dcc; length=1554; parent=FBgn0263111; release=r6.38; species=Dmel;	-1	588	c(605, 1194)	-1	FBgn0263111	3	0	1	2	0	cac
FBtr0308953	actcccttcagcacaacccaccggcacgcaggacccattcgtccttggccgcagattttgacttcgattggaaggagctcagcaactggtagtcgcttgggtagtatataatattaggtgttgctaaatgtaaggggaaatcgcggcgttccgtatacgccccgttgtccttgttccagacgggctaactattccgctgtacccttaacattgtgcattgtcctaattgcgttaggcagttaagttctcagtgtgctgaaacatacattaagtggtatacatacatacaccatatgtaaatgtggttatagctgcggccaaagaactagttgtgactgcttctaacaattcctgatatatgacggttgccaataaaactgcccaggatattaaccatca…	>FBtr0308953 type=three_prime_UTR; loc=3R:5808270..5813258;MD5=e5c652906363e2855a8dc2a3659798fb; length=4989; parent=FBgn0263353; release=r6.38; species=Dmel;	-1	4497	-1	c(1743, 3260)	FBgn0263353	3	0	1	0	2	CG11000
FBtr0072072	gaaggataacgcgacgaaccggcatggaaagaagagacaaggaaaggaataccaaagtcatatttttcagaaaaatacaaaagcagttaaactcaaacacacacacacacacaagcacacagatgccgaacctaaatgtacatacacacgcatgcggcaggagcacaggagcatcaaggatgtggacaggacatgaaaagcgcattaggcgcatcccagcattcgatgttcatgcatgcagcaccatacccaaccgcccgaaactcaagtgcgagatgccgccagtagaagatcatggaatatatatacattatcgagagtgtatataggatgcgtgtgtgctccattttcacatttgcataaaagacaagccagcgagcgtgtagttatcgatagcca…	>FBtr0072072 type=three_prime_UTR; loc=2R:23653819..23654820;MD5=e4738461ab8e7d01fa68560e17ad565a; length=1002; parent=FBgn0004795; release=r6.38; species=Dmel;	-1	c(137, 584)	-1	321	FBgn0004795	3	0	2	0	1	retn
FBtr0072073	gaaggataacgcgacgaaccggcatggaaagaagagacaaggaaaggaataccaaagtcatatttttcagaaaaatacaaaagcagttaaactcaaacacacacacacacacaagcacacagatgccgaacctaaatgtacatacacacgcatgcggcaggagcacaggagcatcaaggatgtggacaggacatgaaaagcgcattaggcgcatcccagcattcgatgttcatgcatgcagcaccatacccaaccgcccgaaactcaagtgcgagatgccgccagtagaagatcatggaatatatatacattatcgagagtgtatataggatgcgtgtgtgctccattttcacatttgcataaaagacaagccagcgagcgtgtagttatcgatagcca…	>FBtr0072073 type=three_prime_UTR; loc=2R:23653819..23654820;MD5=e4738461ab8e7d01fa68560e17ad565a; length=1002; parent=FBgn0004795; release=r6.38; species=Dmel;	-1	c(137, 584)	-1	321	FBgn0004795	3	0	2	0	1	retn
FBtr0340029	gaaggataacgcgacgaaccggcatggaaagaagagacaaggaaaggaataccaaagtcatatttttcagaaaaatacaaaagcagttaaactcaaacacacacacacacacaagcacacagatgccgaacctaaatgtacatacacacgcatgcggcaggagcacaggagcatcaaggatgtggacaggacatgaaaagcgcattaggcgcatcccagcattcgatgttcatgcatgcagcaccatacccaaccgcccgaaactcaagtgcgagatgccgccagtagaagatcatggaatatatatacattatcgagagtgtatataggatgcgtgtgtgctccattttcacatttgcataaaagacaagccagcgagcgtgtagttatcgatagcca…	>FBtr0340029 type=three_prime_UTR; loc=2R:23653819..23654677;MD5=9bfcd6de83ec8642868c68c77dbb483e; length=859; parent=FBgn0004795; release=r6.38; species=Dmel;	-1	c(137, 584)	-1	321	FBgn0004795	3	0	2	0	1	retn
FBtr0340030	gaaggataacgcgacgaaccggcatggaaagaagagacaaggaaaggaataccaaagtcatatttttcagaaaaatacaaaagcagttaaactcaaacacacacacacacacaagcacacagatgccgaacctaaatgtacatacacacgcatgcggcaggagcacaggagcatcaaggatgtggacaggacatgaaaagcgcattaggcgcatcccagcattcgatgttcatgcatgcagcaccatacccaaccgcccgaaactcaagtgcgagatgccgccagtagaagatcatggaatatatatacattatcgagagtgtatataggatgcgtgtgtgctccattttcacatttgcataaaagacaagccagcgagcgtgtagttatcgatagcca…	>FBtr0340030 type=three_prime_UTR; loc=2R:23653819..23654820;MD5=e4738461ab8e7d01fa68560e17ad565a; length=1002; parent=FBgn0004795; release=r6.38; species=Dmel;	-1	c(137, 584)	-1	321	FBgn0004795	3	0	2	0	1	retn
FBtr0340031	gaaggataacgcgacgaaccggcatggaaagaagagacaaggaaaggaataccaaagtcatatttttcagaaaaatacaaaagcagttaaactcaaacacacacacacacacaagcacacagatgccgaacctaaatgtacatacacacgcatgcggcaggagcacaggagcatcaaggatgtggacaggacatgaaaagcgcattaggcgcatcccagcattcgatgttcatgcatgcagcaccatacccaaccgcccgaaactcaagtgcgagatgccgccagtagaagatcatggaatatatatacattatcgagagtgtatataggatgcgtgtgtgctccattttcacatttgcataaaagacaagccagcgagcgtgtagttatcgatagcca…	>FBtr0340031 type=three_prime_UTR; loc=2R:23653819..23654820;MD5=e4738461ab8e7d01fa68560e17ad565a; length=1002; parent=FBgn0004795; release=r6.38; species=Dmel;	-1	c(137, 584)	-1	321	FBgn0004795	3	0	2	0	1	retn
FBtr0113114	tctcattaagtgaataaacatacatacgtacgagtatatatatatacatacacgcccaaaaaccactcaccacacacatacccacacatgcataaaacattttgttattttgagagagcgcatcggaaattcggcgaatcggaaacggaaacggtatctgaaggatcgatcccagaggcaggaagagccgcgaaaatactgttttgaacacaacgaaaagatggagtaaatggagcgtgtgctaagctacatggatagcaattaatagccattcgatatcggtgtccattaaatgaatgtgaatcgtttactactcaattaccaatagtctgtgtctatggttagccaacacgccaattaatcacgtatgcagccacaatgcaagaatggaaaataatt…	>FBtr0113114 type=three_prime_UTR; loc=2R:23732649..23734846;MD5=91e527b2a06a071891124c8b36ba85e7; length=2198; parent=FBgn0034897; release=r6.38; species=Dmel;	-1	c(473, 1359)	1029	-1	FBgn0034897	3	0	2	1	0	Sesn
FBtr0070795	cagccttagtgaacaactcaactagcaaccaagaactatatgaaaacttaaaagcaaacttaaacaacaatcactcaaacccaaatcaagcaacttggcggtgcaacaaaaaaggaatgcttgagtattgcgcaacaggctccaagatgcggattcggattaaggatttcgttagcagcttttgcagttagcatgtagcatgtagcacacagcaaatagcaattgcccgattccaaaagaactggcaagtgcagaggcctcaaaacaaagaaaatgaaacgtttgttacgttgtttagattgcgactgagcccagagagagccccttaatcattacataacaaacaacacacactcgccaaatacacacacacacacacacacacacacacgcatatat…	>FBtr0070795 type=three_prime_UTR; loc=X:complement(5412386..5414972);MD5=131f57e6864a3f52820994e82392334a; length=2587; parent=FBgn0263987; release=r6.38; species=Dmel;	c(818, 1202)	629	-1	-1	FBgn0263987	3	2	1	0	0	spoon
FBtr0330351	caatcggagttccttaaacgcaattcacaacaaccaactggagcaacaacatcagcaacaggcgctttgccaacaactaccgcattttcagcagccacgcccacatcggcagtaacctccgtatcagcaacagtgacaacaacggcccactataataaccttggcagcagctttaggccaaccttacctttgcccactgaaagctccaaccacaatgcccacataccctatacatttgccagctggcgcagcggtacctactgctatcgcaaccacaacaacaatagtgaaaactacagcgataacaacaacaaccacaggaacgtacccgattcccaatcccaaaacgatacatcatccaacaccaattgctccaaagttgaactggtcgagagacta…	>FBtr0330351 type=three_prime_UTR; loc=3L:complement(join(13521907..13525210,13532954..13537996,13538246..13538743));MD5=7fa558289c138f75a4e5491809b1a0d8; length=8845; parent=FBgn0264001; release=r6.38; species=Dmel;	3122	-1	6285	6422	FBgn0264001	3	1	0	1	1	bru3
FBtr0332994	tgctacaaaaaggcgctgcgtcacatttgcaagaaatggactattgttatggaatacaatacaaagactgcctcatgccatgccatccactattaccaccaacccaacagcggcagcagctatagcaactacagtagccgtcgtcaccatcagcatcagcagctgacgtcatcagcgtcaacgtcatcgtccacatcatcactgcagccgccccggaagcgctactccctcgcccaggatcgtctaaatcccttcgaactggatatctgcgatcccggagagatgggcagtaaggaggaggaggaggaggaggaggaggagaaagaggaaaatgaacaagaggagcaggaggaggaagaggaggagccagggagaagttactaccagaggagtcagatg…	>FBtr0332994 type=three_prime_UTR; loc=X:join(19013349..19013399,19025615..19028629);MD5=d47b210d5d175945d10dedc0836fc5e8; length=3066; parent=FBgn0264090; release=r6.38; species=Dmel;	1360	c(1027, 1240)	-1	-1	FBgn0264090	3	1	2	0	0	CG43759
FBtr0334979	aattaagcaaaaaaaacactacaagtaaagcataaacatacatacatatatagatacttgaacacgctaaattgccgaagcaaagccagcaaattcgtaatgtaattcgtagagaaacatgcagaccgacatgagaactcgtttgctaaattctagggccttgcaaagtcatctaattttaatggaacaaagggaaacacaaagtacatctaattattcattaatgattatttaaatggcaacaacatgacaaaaccagtgataaaaacgtcaaaatgaaaacattagtttaaactgagttgttaatggggaaaaaagaaaaatgaataagttgttaataattaatatttacgaaagttaaatttatgcaaatgagcaaacatacgaatgaaacatttt…	>FBtr0334979 type=three_prime_UTR; loc=3L:complement(15848578..15851751);MD5=7e719fd2770d0e2f5035a7de5a4f2525; length=3174; parent=FBgn0264908; release=r6.38; species=Dmel;	c(2643, 3013)	-1	-1	904	FBgn0264908	3	2	0	0	1	pHCl-1
FBtr0334981	aattaagcaaaaaaaacactacaagtaaagcataaacatacatacatatatagatacttgaacacgctaaattgccgaagcaaagccagcaaattcgtaatgtaattcgtagagaaacatgcagaccgacatgagaactcgtttgctaaattctagggccttgcaaagtcatctaattttaatggaacaaagggaaacacaaagtacatctaattattcattaatgattatttaaatggcaacaacatgacaaaaccagtgataaaaacgtcaaaatgaaaacattagtttaaactgagttgttaatggggaaaaaagaaaaatgaataagttgttaataattaatatttacgaaagttaaatttatgcaaatgagcaaacatacgaatgaaacatttt…	>FBtr0334981 type=three_prime_UTR; loc=3L:complement(15848578..15851751);MD5=7e719fd2770d0e2f5035a7de5a4f2525; length=3174; parent=FBgn0264908; release=r6.38; species=Dmel;	c(2643, 3013)	-1	-1	904	FBgn0264908	3	2	0	0	1	pHCl-1
FBtr0299549	gatacggccaatggggggagtgaatacgttggtggtgccatggaggccatggacggtttcggctatgatagcggcgagatctcctgcacctacatggacccaatcgatcagacatgagacctggcctacggtgaggtgtgtggtccccccgagggggcccgttaaggacccttttcacgacctggtggctcagctgagtgcctggatagcataacctagaaatttctatggattcgaaaccattttaaaaggttcctaagagtatgccataaaaagtttaaagctgtttcgtttttgaaacatgttgtagcatacttttggacacttttatacgagtctagggttttctgtgaatcaaacttaaaagagaataaccttaaatcaaaatttgaagccttt…	>FBtr0299549 type=three_prime_UTR; loc=3L:complement(7160304..7162427);MD5=8ba42885aa818b8e905266b49469980f; length=2124; parent=FBgn0265296; release=r6.38; species=Dmel;	2065	1562	-1	1974	FBgn0265296	3	1	1	0	1	Dscam2
FBtr0330335	gacctggcctacggtgaggtgtgtggtccccccgagggggcccgttaaggacccttttcacgacctggtggctcagctgagtgcctggatagcataacctagaaatttctatggattcgaaaccattttaaaaggttcctaagagtatgccataaaaagtttaaagctgtttcgtttttgaaacatgttgtagcatacttttggacacttttatacgagtctagggttttctgtgaatcaaacttaaaagagaataaccttaaatcaaaatttgaagcctttaaggtacaagctgatacaacaggtcgtgaaatttgtgcccacccacgcacacccaaccacacaaccagactagaactacaccactaggtctataaacgaatgaatgcttgaatgctg…	>FBtr0330335 type=three_prime_UTR; loc=3L:complement(7160304..7162310);MD5=f045b74574f30f4062670add53e4f65d; length=2007; parent=FBgn0265296; release=r6.38; species=Dmel;	1948	1445	-1	1857	FBgn0265296	3	1	1	0	1	Dscam2
FBtr0330336	gatacggccaatggggggagtgaatacgttggtggtgccatggaggccatggacggtttcggctatgatagcggcgagatctcctgcacctacatggacccaatcgatcagacatgagacctggcctacggtgaggtgtgtggtccccccgagggggcccgttaaggacccttttcacgacctggtggctcagctgagtgcctggatagcataacctagaaatttctatggattcgaaaccattttaaaaggttcctaagagtatgccataaaaagtttaaagctgtttcgtttttgaaacatgttgtagcatacttttggacacttttatacgagtctagggttttctgtgaatcaaacttaaaagagaataaccttaaatcaaaatttgaagccttt…	>FBtr0330336 type=three_prime_UTR; loc=3L:complement(7160304..7162427);MD5=8ba42885aa818b8e905266b49469980f; length=2124; parent=FBgn0265296; release=r6.38; species=Dmel;	2065	1562	-1	1974	FBgn0265296	3	1	1	0	1	Dscam2
FBtr0330337	ggacccttttcacgacctggtggctcagctgagtgcctggatagcataacctagaaatttctatggattcgaaaccattttaaaaggttcctaagagtatgccataaaaagtttaaagctgtttcgtttttgaaacatgttgtagcatacttttggacacttttatacgagtctagggttttctgtgaatcaaacttaaaagagaataaccttaaatcaaaatttgaagcctttaaggtacaagctgatacaacaggtcgtgaaatttgtgcccacccacgcacacccaaccacacaaccagactagaactacaccactaggtctataaacgaatgaatgcttgaatgctgtggttgcaatcagaaaaccaactctggaccctttcttgtacttgcacc…	>FBtr0330337 type=three_prime_UTR; loc=3L:complement(7160304..7162262);MD5=65364c176deb07fd3849d972207b8d6d; length=1959; parent=FBgn0265296; release=r6.38; species=Dmel;	1900	1397	-1	1809	FBgn0265296	3	1	1	0	1	Dscam2
FBtr0339134	gacattggtaagatctgatcgcaagatcagcagattggatgagaccgggccccccgatagccacaaatttagcagcagccgggccgtttttgtacatttttgtaatgcatttgttaccttaccaagacgccccccccccccctaaaccccctaaaaaccattacaccactcttgaaatgataaacctcaattccaaactttcggaacagccccgcaccaagtaatacccttctctctccccaaaagaaacaaccagatgaacactcagtaaactttcggacaatcagtatcaaaattctgcaccaaccatccaaaaaccaaaacataccgaatcgaaacacttcccattatgaactcctgcccgtatttatagaggtcatactatatctaagtattaac…	>FBtr0339134 type=three_prime_UTR; loc=3L:complement(7160304..7161356);MD5=c9e841e2003321abfd0b716a19bab8b9; length=1053; parent=FBgn0265296; release=r6.38; species=Dmel;	994	491	-1	903	FBgn0265296	3	1	1	0	1	Dscam2
FBtr0346856	gatacggccaatggggggagtgaatacgttggtggtgccatggaggccatggacggtttcggctatgatagcggcgagatctcctgcacctacatggacccaatcgatcagacatgagacctggcctacggtgaggtgtgtggtccccccgagggggcccgttaaggacccttttcacgacctggtggctcagctgagtgcctggatagcataacctagaaatttctatggattcgaaaccattttaaaaggttcctaagagtatgccataaaaagtttaaagctgtttcgtttttgaaacatgttgtagcatacttttggacacttttatacgagtctagggttttctgtgaatcaaacttaaaagagaataaccttaaatcaaaatttgaagccttt…	>FBtr0346856 type=three_prime_UTR; loc=3L:complement(7160304..7162427);MD5=8ba42885aa818b8e905266b49469980f; length=2124; parent=FBgn0265296; release=r6.38; species=Dmel;	2065	1562	-1	1974	FBgn0265296	3	1	1	0	1	Dscam2
FBtr0086994	tagatctatgtgcagtcggttaaattgtagattcgttcatttaactgaagatgacaaggtcgaggtgattgatcaacgtgttgctgtctgccgcgatcatgccaacagccagtgccgccgcaagcagtgtaaatactaccacataccgattgtcctgccgccggccaacatcatggcggccatgatcaccagtcccagtgatcagcagccagctgtgccggtggccacaacaacagccaatccggcggcagcggcggcggcggcagcagcagcaacagcagccggctacaacggcaccagcaacttgataatcatcgagccgcagcagcaacagcaacagccgccgcagcagcagcaacagttcagctatcacagcaacagcagcaataacaactacta…	>FBtr0086994 type=three_prime_UTR; loc=2R:join(17373112..17373161,17373818..17379376);MD5=fa68722416025ef1ecfe871f70f00c65; length=5609; parent=FBgn0265487; release=r6.38; species=Dmel;	128	-1	-1	c(2727, 2949)	FBgn0265487	3	1	0	0	2	mbl
FBtr0480511	tagatctatgtgcagtcggttaaattgtagattcgttcatttaactgaagatgacaaggtcgaggtgattgatcaacgtgttgctgtctgccgcgatcatgccaacagccagtgccgccgcaagcagtgtaaatactaccacataccgattgtcctgccgccggccaacatcatggcggccatgatcaccagtcccagtgatcagcagccagctgtgccggtggccacaacaacagccaatccggcggcagcggcggcggcggcagcagcagcaacagcagccggctacaacggcaccagcaacttgataatcatcgagccgcagcagcaacagcaacagccgccgcagcagcagcaacagttcagctatcacagcaacagcagcaataacaactacta…	>FBtr0480511 type=three_prime_UTR; loc=2R:join(17373112..17373161,17373818..17379376);MD5=fa68722416025ef1ecfe871f70f00c65; length=5609; parent=FBgn0265487; release=r6.38; species=Dmel;	128	-1	-1	c(2727, 2949)	FBgn0265487	3	1	0	0	2	mbl
FBtr0340178	ctctttcaaaattaggatctcaaaaactgaagcccattaactagcagagccgttcgtaaaagcagacatatcctacgccaaaaactttaagacagaaaccaaaggattaatttatataataacctttggtttaattcaaaattcaatcgatgtatgtgtgcatgaacaaggggatacatatatgtattacctaattaagagccagatattacacttgaatatcgaaatggtaactacttaacgcgagcatttaagcagaggctaagaaattgtaaataattattcgtagtattaggcaattgtatgtagttttaagaaattgttgtttaggcaaatcattcgttgatcttatgtgatattttcttcattttgaaagcgataggaagtaaaaccgtgtag…	>FBtr0340178 type=three_prime_UTR; loc=2L:17170430..17173118;MD5=e4c421dd1343b1fb1460df8d039d847f; length=2689; parent=FBgn0265607; release=r6.38; species=Dmel;	c(271, 770)	2332	-1	-1	FBgn0265607	3	2	1	0	0	beat-IIIa
FBtr0087793	tcacaagcgtttctttggctgtgcggaacgcaaatgtatcttgtggcgccgctggagaatctgcgaaataccgacagcaactgaggtgatgatcaaccgtataaacaactcctatagcgcaagttttccaaacctcgctcccgaagatgaagtgcaatttaatcaaccattagaatggatcgtaagccttagaactaacccgaacaacactgagcaatatctacaacacagcggaatgtatctgttggatgcgaaaaccgcatcatttgcatacatatatgcaaacatttgcaatcgaattagtacgcgactaaataaataatccaagcaaatttcaaaaatgccagcaacaatattcattaataaataacccaactgtgagagaaagagagaagaagc…	>FBtr0087793 type=three_prime_UTR; loc=2R:join(13004377..13004383,13005765..13007802);MD5=9eb536c19ff6b198d004ed6054b7e251; length=2045; parent=FBgn0265623; release=r6.38; species=Dmel;	-1	c(1233, 1509)	1173	-1	FBgn0265623	3	0	2	1	0	Su(z)2
FBtr0300387	tcacaagcgtttctttggctgtgcggaacgcaaatgtatcttgtggcgccgctggagaatctgcgaaataccgacagcaactgaggtgatgatcaaccgtataaacaactcctatagcgcaagttttccaaacctcgctcccgaagatgaagtgcaatttaatcaaccattagaatggatcgtaagccttagaactaacccgaacaacactgagcaatatctacaacacagcggaatgtatctgttggatgcgaaaaccgcatcatttgcatacatatatgcaaacatttgcaatcgaattagtacgcgactaaataaataatccaagcaaatttcaaaaatgccagcaacaatattcattaataaataacccaactgtgagagaaagagagaagaagc…	>FBtr0300387 type=three_prime_UTR; loc=2R:join(13004377..13004383,13005765..13007911);MD5=bc7faf2c9151a7abb11ba77dcb99dfec; length=2154; parent=FBgn0265623; release=r6.38; species=Dmel;	-1	c(1233, 1509)	1173	-1	FBgn0265623	3	0	2	1	0	Su(z)2
FBtr0330613	ggtgatgatcaaccgtataaacaactcctatagcgcaagttttccaaacctcgctcccgaagatgaagtgcaatttaatcaaccattagaatggatcgtaagccttagaactaacccgaacaacactgagcaatatctacaacacagcggaatgtatctgttggatgcgaaaaccgcatcatttgcatacatatatgcaaacatttgcaatcgaattagtacgcgactaaataaataatccaagcaaatttcaaaaatgccagcaacaatattcattaataaataacccaactgtgagagaaagagagaagaagcgaggaggagaataataatactaatcaaaagcgctggcgttcgctggcattttcgaaagcaggcaaaaaagcaacaacaaaatta…	>FBtr0330613 type=three_prime_UTR; loc=2R:13005842..13007802;MD5=ab951b915a68b4f8eeb0d12c693f33d0; length=1961; parent=FBgn0265623; release=r6.38; species=Dmel;	-1	c(1149, 1425)	1089	-1	FBgn0265623	3	0	2	1	0	Su(z)2
FBtr0344443	atgataacatgcctgatttttgtatggacatacacttctctttcttaaataaaccaatctaaaagactttcttttgcgtggtagacaattagccgatatctacaagatgaacacttgatatcgacacaatatggcgctttcactactcagactaatacttacacacaaatcagatcagaacagctttgaagatcgaaataataaaaatattaaacaaattcaacgcatcacttgtgatactaacatttttcatgtgactcaccaaaatgtagatacttattcattctctttcaatttgttgtaacttaagtaagaagctgactattaaattatatattttcatgatcactgattacgaactattaaatacttcatgtgcatactttttggcatttgtaa…	>FBtr0344443 type=three_prime_UTR; loc=3R:complement(10769453..10770406);MD5=7fe2694fed6bde283aac9d028f50bb48; length=954; parent=FBgn0266446; release=r6.38; species=Dmel;	503	-1	268	783	FBgn0266446	3	1	0	1	1	CG45076
FBtr0346001	gatgaggcgcgtaggagacggctcctacgcagataaggaaccagctccatgatcagacacgctcacacaccaacacacacactaaatacaggatataacaaagccgttgtgtataaatcctattattaccagaagctctacgattagatcgatgtaagacacattttttcgctagagttttttgttttttttttctttttttttggtgcaagctagagaaaaacaaaatgacgggcaactaattagcacgggtattaaagtgtttaagattctgaatatacacctatctctctaaaatataaatattatgtgtggagtaaggtttacgattataattacggattataattattatcgtagcacaagattaagtttttctacaactatgattaagtgcag…	>FBtr0346001 type=three_prime_UTR; loc=X:complement(13846116..13854098);MD5=1279b00c54ce36908781f381984d1b08; length=7983; parent=FBgn0267033; release=r6.38; species=Dmel;	c(4650, 5349)	6193	-1	-1	FBgn0267033	3	2	1	0	0	mamo
FBtr0346004	tgaaacgactttagtttgttattaaattattattattactactattactactataataataacaacaataacaacaacaacaacaacaaccacaataacaacgcaaactatttgcaacacaccaacaacaacatcaacaacaccaacaatttcaactacaacaacaattgatgaggacgatccaacaagaactttgacttacttaaggatgaaaatgaagaagaagatgcaggaggagaaggagagaccaacacaacaatacaccaatgcacacacacccacatatatgtatataccgttgaatccatgtatatacatatgtatatattttattaatt	>FBtr0346004 type=three_prime_UTR; loc=X:complement(13869216..13869553);MD5=f1f9d5f343507c4e5270112d8b27a554; length=338; parent=FBgn0267033; release=r6.38; species=Dmel;	-1	-1	-1	c(288, 308, 320)	FBgn0267033	3	0	0	0	3	mamo
FBtr0346005	tgaaacgactttagtttgttattaaattattattattactactattactactataataataacaacaataacaacaacaacaacaacaaccacaataacaacgcaaactatttgcaacacaccaacaacaacatcaacaacaccaacaatttcaactacaacaacaattgatgaggacgatccaacaagaactttgacttacttaaggatgaaaatgaagaagaagatgcaggaggagaaggagagaccaacacaacaatacaccaatgcacacacacccacatatatgtatataccgttgaatccatgtatatacatatgtatatattttattaatt	>FBtr0346005 type=three_prime_UTR; loc=X:complement(13869216..13869553);MD5=f1f9d5f343507c4e5270112d8b27a554; length=338; parent=FBgn0267033; release=r6.38; species=Dmel;	-1	-1	-1	c(288, 308, 320)	FBgn0267033	3	0	0	0	3	mamo
FBtr0346006	tgaaacgactttagtttgttattaaattattattattactactattactactataataataacaacaataacaacaacaacaacaacaaccacaataacaacgcaaactatttgcaacacaccaacaacaacatcaacaacaccaacaatttcaactacaacaacaattgatgaggacgatccaacaagaactttgacttacttaaggatgaaaatgaagaagaagatgcaggaggagaaggagagaccaacacaacaatacaccaatgcacacacacccacatatatgtatataccgttgaatccatgtatatacatatgtatatattttattaattatgtaaacgaggcatcaattctgaaagttttgggcaagcagaaactctagcaaataggaaa…	>FBtr0346006 type=three_prime_UTR; loc=X:complement(13865862..13869553);MD5=0f88ecd183f323400459bff8fa0cefe3; length=3692; parent=FBgn0267033; release=r6.38; species=Dmel;	-1	-1	-1	c(288, 308, 320)	FBgn0267033	3	0	0	0	3	mamo
FBtr0084121	tcgttacgaactgtagttctgtagaaaaacatgtaaatagatgaggagaagcagcatggatatagatagagtagcaagtctttgccgcaagccaagcttcttggaatttgactcttctctatgcctgcaaattagggtggaggagatgtaggtccaaagatatttgtatattttcaatatgactggctagcaatccattgtaacatttctagcgatgaagcttcaaacaagaagttgattctttagttaaaattttgcattaatagaaaattaagcacattgtgtcagtcttcgtaaaataacacacctttccgtagatggatgacaccttttcttcttggtgtcgaaccaaaattgtaaattttagattcatagagcctaattttcaattctcaattg…	>FBtr0084121 type=three_prime_UTR; loc=3R:complement(21570248..21573390);MD5=57cd0aad4c6833db2f1fa9fe8c2593e5; length=3143; parent=FBgn0283499; release=r6.38; species=Dmel;	32	2629	-1	2954	FBgn0283499	3	1	1	0	1	InR
FBtr0290230	tcgttacgaactgtagttctgtagaaaaacatgtaaatagatgaggagaagcagcatggatatagatagagtagcaagtctttgccgcaagccaagcttcttggaatttgactcttctctatgcctgcaaattagggtggaggagatgtaggtccaaagatatttgtatattttcaatatgactggctagcaatccattgtaacatttctagcgatgaagcttcaaacaagaagttgattctttagttaaaattttgcattaatagaaaattaagcacattgtgtcagtcttcgtaaaataacacacctttccgtagatggatgacaccttttcttcttggtgtcgaaccaaaattgtaaattttagattcatagagcctaattttcaattctcaattg…	>FBtr0290230 type=three_prime_UTR; loc=3R:complement(21570248..21573390);MD5=57cd0aad4c6833db2f1fa9fe8c2593e5; length=3143; parent=FBgn0283499; release=r6.38; species=Dmel;	32	2629	-1	2954	FBgn0283499	3	1	1	0	1	InR
FBtr0290231	tcgttacgaactgtagttctgtagaaaaacatgtaaatagatgaggagaagcagcatggatatagatagagtagcaagtctttgccgcaagccaagcttcttggaatttgactcttctctatgcctgcaaattagggtggaggagatgtaggtccaaagatatttgtatattttcaatatgactggctagcaatccattgtaacatttctagcgatgaagcttcaaacaagaagttgattctttagttaaaattttgcattaatagaaaattaagcacattgtgtcagtcttcgtaaaataacacacctttccgtagatggatgacaccttttcttcttggtgtcgaaccaaaattgtaaattttagattcatagagcctaattttcaattctcaattg…	>FBtr0290231 type=three_prime_UTR; loc=3R:complement(21570248..21573390);MD5=57cd0aad4c6833db2f1fa9fe8c2593e5; length=3143; parent=FBgn0283499; release=r6.38; species=Dmel;	32	2629	-1	2954	FBgn0283499	3	1	1	0	1	InR
FBtr0290232	tcgttacgaactgtagttctgtagaaaaacatgtaaatagatgaggagaagcagcatggatatagatagagtagcaagtctttgccgcaagccaagcttcttggaatttgactcttctctatgcctgcaaattagggtggaggagatgtaggtccaaagatatttgtatattttcaatatgactggctagcaatccattgtaacatttctagcgatgaagcttcaaacaagaagttgattctttagttaaaattttgcattaatagaaaattaagcacattgtgtcagtcttcgtaaaataacacacctttccgtagatggatgacaccttttcttcttggtgtcgaaccaaaattgtaaattttagattcatagagcctaattttcaattctcaattg…	>FBtr0290232 type=three_prime_UTR; loc=3R:complement(21570248..21573390);MD5=57cd0aad4c6833db2f1fa9fe8c2593e5; length=3143; parent=FBgn0283499; release=r6.38; species=Dmel;	32	2629	-1	2954	FBgn0283499	3	1	1	0	1	InR
FBtr0452121	ttccaatccaagacgaaattccccccaaagaagtccattcaacttgctgcaattatttgtgccaacgatctcgagatctcatttgcaaccgcaaaataatcacaacataacaaaacaaaacaaaaataaattttaaaacaaaaaatccccccacgaaaaacaattgaaacgcgtgcataattgctaatataaaacaaaagaaggaaaaacagaatttcagtgctttttgtttgtttttttttttttattgtttggctttttgtgctcctcaaatgtgaggaagagaattcaatcgaagaattgcaaaaacgaaacgagcaaaagagtgcgtgagatagagagcagaaagagagaggaagatccacggcggccaaaaagcattttcgaaatggtactaca…	>FBtr0452121 type=three_prime_UTR; loc=X:complement(join(16826681..16827605,16827676..16828075,16834612..16834998));MD5=79f339252c7a81d5aa308db63666823f; length=1712; parent=FBgn0284222; release=r6.38; species=Dmel;	-1	1361	-1	c(1410, 1568)	FBgn0284222	3	0	1	0	2	CG46306
FBtr0342807	tcgctacacgttaggttttctgaggcaccggtatctccgactccggtttagaggtggagtcgggtccgccggttcgcagtcagaagatgtcgagtccgacaagccaccttacttccatttcgcccctgaaaagaaagaaaagaaaaaaagaaaagaaacgaaacgaaagacccactcaaaaatgggcttacttcaaagaaaatcaattttgaacaaaagcttgttaggccagcccgaaaaccaaaccaaaccaaactaaataaataagaaattgcgaaaagagtaataatgcttaaatgtataagaaaagaaagaattttcaaggattaggctttgttaagcaggtttgatcgttcgctgattttactaattccccactcaattgaatgacacatatat…	>FBtr0342807 type=three_prime_UTR; loc=X:complement(2479617..2480725);MD5=0a8919b1418bf472594dc012d2d030a7; length=1109; parent=FBgn0284408; release=r6.38; species=Dmel;	-1	-1	-1	c(562, 635, 693)	FBgn0284408	3	0	0	0	3	trol-
FBtr0073418	ggaggaatcaccgttaaaggagagccggcgccgcagcagcagcagcagaagcagcaaaagcagcagcagcagcaacatcagcagcagcagcagcagcagcagcgaaagcgccaaaaatagccaaggcagggttttctactgttgatactacctccacagcacacccataagattcaataccccaagacccaaaagcacccaccacaatttacaaccctatataactacaagctaaccgtaggcgccacctttgtgctggcacaggcgacggcaaaagtaagcaagcaacctggagcagtaacataagcaaaattttacgcatatagaactgtaggggaaccaccacatcaaaaagtgagctgcgtgaagagctctactagttcatagcagtgtatttcg…	>FBtr0073418 type=three_prime_UTR; loc=X:complement(10792508..10797068);MD5=d856fb5cc9c548f9f24ed900ab339aa6; length=4561; parent=FBgn0285926; release=r6.38; species=Dmel;	-1	-1	-1	c(3278, 3349, 3443)	FBgn0285926	3	0	0	0	3	Imp
FBtr0299918	tattctacccgacgcacaagtaaataaacccatatggcgacaaatttgaaaaaagcaaacaggacatacctactgattaaacagtttgtaaacatcactatatatgaagccagtttgtatatatatatatatatatatttaaaacgcacaatgcactgtttttatttaataattttaaacactgccaatgtccaattatatataaataacaatatacctttccttctattttcacccagtagcttactatcaaatgtatatattttattatttgtgtgtatttgtaggaaccaaaaataacaatacattaatttattttatgaaaaagccattatgtaacctttttattgttgaaaatgactgcaagcaacaacccacttctgttttattttatacaaa…	>FBtr0299918 type=three_prime_UTR; loc=2R:5446977..5447974;MD5=a12e4397ff40dc04bf71124f9e236d6d; length=998; parent=FBgn0286203; release=r6.38; species=Dmel;	745	-1	-1	c(116, 255)	FBgn0286203	3	1	0	0	2	stw
FBtr0479860	ccgaactccagttccttctcttccccccaactcatccattttccggaggtttcagttcgacgggaaatgtcgctcaggccactgcagagtttcaaaatcaaaattgaggaataccaactagaggataaggctacttaaggatcaaaaaacaccaaggagacgagattttctaccaaatcgagagacgaggggcaggttaatttcgtcatttttggccaagacagcaaatagaggaacagcaaagcgaaaatcattttatacctcacacaacaactacacactaactaagattaggctacgcaactgtacattgtacttaagtgttcaaagtatatttagtttactttgtatataagaaaagtagctaaaagcacgcggacagggaggcaggagcaccac…	>FBtr0479860 type=three_prime_UTR; loc=3R:complement(join(6896253..6898538,6908513..6908738,6909290..6910066,6910220..6910471,6957934..6958020));MD5=9de1d0aeaddaedaaf975a16ac680ad9e; length=3628; parent=FBgn0287588; release=r6.38; species=Dmel;	3472	-1	3013	347	FBgn0287588	3	1	0	1	1	CG46458
FBtr0072767	atacgacagtcgcctgacacttagatcgattctaggttgtgataataattatttgtccggatttcgtttggatcttatacacacactctgtacatagtcctcgaaggacagtgggtggttgaacgtgctttaaaccctgtaaatagctggactaagctccgtactactttaagtatcccgtatcctgactatcttaacgtgttttcgttgcatattctgtacgtcttagccgtagttccattgacgttggctggacttccgcgcgccacgcaggcccatatcagcggaattgtatatagccaaagtgcaaacgacatttctaatttaagtaggtcccgtactcgtatgtgtatgtatatgtatgtagtgattacgccccttaaacaataaacagatata…	>FBtr0072767 type=three_prime_UTR; loc=3L:1745013..1745421;MD5=93c5e58ffb916f2f9e8aa9dc34c90bff; length=409; parent=FBgn0035266; release=r6.38; species=Dmel;	138	89	-1	291	FBgn0035266	3	1	1	0	1	Gk2
FBtr0072768	atacgacagtcgcctgacacttagatcgattctaggttgtgataataattatttgtccggatttcgtttggatcttatacacacactctgtacatagtcctcgaaggacagtgggtggttgaacgtgctttaaaccctgtaaatagctggactaagctccgtactactttaagtatcccgtatcctgactatcttaacgtgttttcgttgcatattctgtacgtcttagccgtagttccattgacgttggctggacttccgcgcgccacgcaggcccatatcagcggaattgtatatagccaaagtgcaaacgacatttctaatttaagtaggtcccgtactcgtatgtgtatgtatatgtatgtagtgattacgccccttaaacaataaacagatata…	>FBtr0072768 type=three_prime_UTR; loc=3L:1745013..1745421;MD5=93c5e58ffb916f2f9e8aa9dc34c90bff; length=409; parent=FBgn0035266; release=r6.38; species=Dmel;	138	89	-1	291	FBgn0035266	3	1	1	0	1	Gk2
FBtr0072769	atacgacagtcgcctgacacttagatcgattctaggttgtgataataattatttgtccggatttcgtttggatcttatacacacactctgtacatagtcctcgaaggacagtgggtggttgaacgtgctttaaaccctgtaaatagctggactaagctccgtactactttaagtatcccgtatcctgactatcttaacgtgttttcgttgcatattctgtacgtcttagccgtagttccattgacgttggctggacttccgcgcgccacgcaggcccatatcagcggaattgtatatagccaaagtgcaaacgacatttctaatttaagtaggtcccgtactcgtatgtgtatgtatatgtatgtagtgattacgccccttaaacaataaacagatata…	>FBtr0072769 type=three_prime_UTR; loc=3L:1745013..1745421;MD5=93c5e58ffb916f2f9e8aa9dc34c90bff; length=409; parent=FBgn0035266; release=r6.38; species=Dmel;	138	89	-1	291	FBgn0035266	3	1	1	0	1	Gk2
FBtr0072770	atacgacagtcgcctgacacttagatcgattctaggttgtgataataattatttgtccggatttcgtttggatcttatacacacactctgtacatagtcctcgaaggacagtgggtggttgaacgtgctttaaaccctgtaaatagctggactaagctccgtactactttaagtatcccgtatcctgactatcttaacgtgttttcgttgcatattctgtacgtcttagccgtagttccattgacgttggctggacttccgcgcgccacgcaggcccatatcagcggaattgtatatagccaaagtgcaaacgacatttctaatttaagtaggtcccgtactcgtatgtgtatgtatatgtatgtagtgattacgccccttaaacaataaacagatata…	>FBtr0072770 type=three_prime_UTR; loc=3L:1745013..1745421;MD5=93c5e58ffb916f2f9e8aa9dc34c90bff; length=409; parent=FBgn0035266; release=r6.38; species=Dmel;	138	89	-1	291	FBgn0035266	3	1	1	0	1	Gk2
FBtr0072771	atacgacagtcgcctgacacttagatcgattctaggttgtgataataattatttgtccggatttcgtttggatcttatacacacactctgtacatagtcctcgaaggacagtgggtggttgaacgtgctttaaaccctgtaaatagctggactaagctccgtactactttaagtatcccgtatcctgactatcttaacgtgttttcgttgcatattctgtacgtcttagccgtagttccattgacgttggctggacttccgcgcgccacgcaggcccatatcagcggaattgtatatagccaaagtgcaaacgacatttctaatttaagtaggtcccgtactcgtatgtgtatgtatatgtatgtagtgattacgccccttaaacaataaacagatata…	>FBtr0072771 type=three_prime_UTR; loc=3L:1745013..1745421;MD5=93c5e58ffb916f2f9e8aa9dc34c90bff; length=409; parent=FBgn0035266; release=r6.38; species=Dmel;	138	89	-1	291	FBgn0035266	3	1	1	0	1	Gk2
FBtr0345817	atacgacagtcgcctgacacttagatcgattctaggttgtgataataattatttgtccggatttcgtttggatcttatacacacactctgtacatagtcctcgaaggacagtgggtggttgaacgtgctttaaaccctgtaaatagctggactaagctccgtactactttaagtatcccgtatcctgactatcttaacgtgttttcgttgcatattctgtacgtcttagccgtagttccattgacgttggctggacttccgcgcgccacgcaggcccatatcagcggaattgtatatagccaaagtgcaaacgacatttctaatttaagtaggtcccgtactcgtatgtgtatgtatatgtatgtagtgattacgccccttaaacaataaacagatata…	>FBtr0345817 type=three_prime_UTR; loc=3L:1745013..1745421;MD5=93c5e58ffb916f2f9e8aa9dc34c90bff; length=409; parent=FBgn0035266; release=r6.38; species=Dmel;	138	89	-1	291	FBgn0035266	3	1	1	0	1	Gk2
FBtr0072904	gccattgccatgcattaatttgttattaattctctagtgtaaatactcgccaagatttagatgtcgaaccgcaattaacgattttttgatagctcctttttcttctcgatgttttcgtatagattgttgtgataatgtgaacttttaagcgccattttgaccggaagcggaactccgccgctccaattgtatttgattttcatatcaatagagcatagtagcactttggaactagttaagttagttaggttgaacgccttgtaaatacgccacgcactggacaccaaaagatcgcattgcagccaaatatcgtggaggtaatcgagagttaactgtacataaggttagctagatgaaattccttaactaagtcataagctagggcaccaccagatagca…	>FBtr0072904 type=three_prime_UTR; loc=3L:complement(2258839..2259328);MD5=3d06e5489e8c12617ada84c109420064; length=490; parent=FBgn0015360; release=r6.38; species=Dmel;	c(38, 260)	334	-1	-1	FBgn0015360	3	2	1	0	0	oxt
FBtr0072980	gattgtgtccgggcaaaaacgattagaagggttcacatggaaggggttgacttagagcaccaatcttgtaaataggatagacacggaaatagggcttaacaaacagctgtggtcaaaatagtagtagcatttctttacatttctttaacattggaattttaaaggagatttaatttccaatctgaataatatattataaaaaaaactaatcactttaaataatttgatgaatttcacgagttttaaataatcaaatctataatgaaatctaaaaaaaacgatgaatgcgattttgggtaaataattattcgattattaaaggtgaacgtagctttttaaatttaataaaaacattttctaagtggcatgagtgcccgggaatgctaatattttgaccgg…	>FBtr0072980 type=three_prime_UTR; loc=3L:3010396..3011860;MD5=5d0d6a5d7b7929fbc0d4afeb102e89ef; length=1465; parent=FBgn0035385; release=r6.38; species=Dmel;	c(67, 1150)	-1	-1	1171	FBgn0035385	3	2	0	0	1	FMRFaR
FBtr0340706	gattgtgtccgggcaaaaacgattagaagggttcacatggaaggggttgacttagagcaccaatcttgtaaataggatagacacggaaatagggcttaacaaacagctgtggtcaaaatagtagtagcatttctttacatttctttaacattggaattttaaaggagatttaatttccaatctgaataatatattataaaaaaaactaatcactttaaataatttgatgaatttcacgagttttaaataatcaaatctataatgaaatctaaaaaaaacgatgaatgcgattttgggtaaataattattcgattattaaaggtgaacgtagctttttaaatttaataaaaacattttctaagtggcatgagtgcccgggaatgctaatattttgaccgg…	>FBtr0340706 type=three_prime_UTR; loc=3L:3010396..3011860;MD5=5d0d6a5d7b7929fbc0d4afeb102e89ef; length=1465; parent=FBgn0035385; release=r6.38; species=Dmel;	c(67, 1150)	-1	-1	1171	FBgn0035385	3	2	0	0	1	FMRFaR
FBtr0332085	gattgtgtccgggcaaaaacgattagaagggttcacatggaaggggttgacttagagcaccaatcttgtaaataggatagacacggaaatagggcttaacaaacagctgtggtcaaaatagtagtagcatttctttacatttctttaacattggaattttaaaggagatttaatttccaatctgaataatatattataaaaaaaactaatcactttaaataatttgatgaatttcacgagttttaaataatcaaatctataatgaaatctaaaaaaaacgatgaatgcgattttgggtaaataattattcgattattaaaggtgaacgtagctttttaaatttaataaaaacattttctaagtggcatgagtgcccgggaatgctaatattttgaccgg…	>FBtr0332085 type=three_prime_UTR; loc=3L:3010396..3011860;MD5=5d0d6a5d7b7929fbc0d4afeb102e89ef; length=1465; parent=FBgn0035385; release=r6.38; species=Dmel;	c(67, 1150)	-1	-1	1171	FBgn0035385	3	2	0	0	1	FMRFaR
FBtr0308639	cgattgcaatggcagcaactttccagcaaattacaacagcaaccgaagcagcaattgtatttcatgcagcataaaattgtcaacaaatgtttaaaagcaaaaaattaagccagcaaactaaaaacgaaggaaactttcaacgcaaaaaaaaagcaagcatagaaatgcaaaaattaaaaaaaaaaaaaaaaaatatcacaaaaaaagaggaaggaaacatgagaaagcgaaaatgaagatggaagggccacattcaagaacataattgataatttaagatttctgttgatcatagcgagagtgccgctcggttttctaattttaagttctttgtttcaccttctttatttgttaattgtgtgtaaataaattcctttcgatattcatgccaatttcaca…	>FBtr0308639 type=three_prime_UTR; loc=3L:complement(3714826..3717391);MD5=5d8363e8175bc69b3a869210a6c652ef; length=2566; parent=FBgn0052264; release=r6.38; species=Dmel;	361	907	-1	1934	FBgn0052264	3	1	1	0	1	CG32264
FBtr0332961	taagaatatttagtttaagaatatatagttttctataactattatcgattatagatgtacgacgatgatggggagtagtgcagtaagcagtactttagctttaaggtaaaaagttataaatagttgagctttctttataaatagcggattatacatatatctagatgtcatgtaattggtgggtgtgcgtgagggtctctaccccgtgctccatgcggtatgcaaattcatttagctttaagtgtacaaatcttatcaatgactaaaacgtgcttcgttttcttaatcgctatttgtatttaaacgtaggataaagtggaatgcttaaagcttgacctggacaacaaaacaattaccgtatataactttagcaacacaaactaggacccaaatgtgcat…	>FBtr0332961 type=three_prime_UTR; loc=X:10862784..10866246;MD5=104f6d240724ff8464cd10fb344a2200; length=3463; parent=FBgn0030243; release=r6.38; species=Dmel;	-1	1068	-1	c(488, 3427)	FBgn0030243	3	0	1	0	2	CG2186
FBtr0334454	gctaaacgatggcaactagcaagctactagcaaccacaatcaaaccgaagaccttaaaacgacaaattttcagtgaaattgttagcggactataaattgaaccagtaagagagcgaattataaaaacctatgtacatatttgcaaattgttttgacaaaggttgagcactaggatactagggttatctttgatctacgtgcagtctaatatgagtttgtgtgactcacatgtgggaaaagatataggtatcttaagaaaatattctcggtatgtaaatatatatagcataatcacgaagtcattcactttcattttaagtatggttttttgaactactgaggtgcctttttatgttaaagccactacatacttgtcttttcttacaaacgttgtattgg…	>FBtr0334454 type=three_prime_UTR; loc=X:11863693..11864754;MD5=a337b6aeb731d3a41d7fa1d80f3222c2; length=1062; parent=FBgn0030343; release=r6.38; species=Dmel;	272	c(131, 1011)	-1	-1	FBgn0030343	3	1	2	0	0	ATP7
FBtr0073662	tgtccattttactgtaagaagctgcgcagggctttggagcacttttgagaggcgacaacacactccccggataatatctggcatctaaaaactctcgacacttctctgttggggtcacattttaaggagcaactgacattttttttggccacggcggcggcatctcaacagtagcatatataaatgtaaatgcactgtctttgtccatgacgaccgaccaaataacaacaaaaagaaacaagaaaacaaaacaaaaacaaaacaacaaaaaggacgacacaacaacagcaaaaacaaagcaacaacagcaagggcaacacaacaacagcaaaaacaaagcaacaacagcaagggcaacacaacaacaacaaaaacaaaacaacaacagcaagggcaaca…	>FBtr0073662 type=three_prime_UTR; loc=X:complement(12569751..12572485);MD5=41178026db19b2525fabfbadbed934ab; length=2735; parent=FBgn0030400; release=r6.38; species=Dmel;	-1	c(1220, 2217)	-1	1530	FBgn0030400	3	0	2	0	1	Pits
FBtr0331718	tgtccattttactgtaagaagctgcgcagggctttggagcacttttgagaggcgacaacacactccccggataatatctggcatctaaaaactctcgacacttctctgttggggtcacattttaaggagcaactgacattttttttggccacggcggcggcatctcaacagtagcatatataaatgtaaatgcactgtctttgtccatgacgaccgaccaaataacaacaaaaagaaacaagaaaacaaaacaaaaacaaaacaacaaaaaggacgacacaacaacagcaaaaacaaagcaacaacagcaagggcaacacaacaacagcaaaaacaaagcaacaacagcaagggcaacacaacaacaacaaaaacaaaacaacaacagcaagggcaaca…	>FBtr0331718 type=three_prime_UTR; loc=X:complement(12569169..12572485);MD5=63dfac918199fb50c179978a7ec23139; length=3317; parent=FBgn0030400; release=r6.38; species=Dmel;	-1	c(1220, 2217)	-1	1530	FBgn0030400	3	0	2	0	1	Pits
FBtr0346120	accacttgtgagagaagtgaaaatacatatattttctacaaaacaactgaactgaagacgatcgcaacgcaatgctttggaacactaggaggagcaaattgacacggcggagatgggttcaccagaaatatacgttttttccctcaaggaaaagtttcatacacacatacaatcaccaaaaagagcagttcagccaacaagacgataaagaggctacctactggagagatagagacagagacaaagacagagatcaggatcacaggatgagcatgttaggcaggacgaggtggatgtcaggagttggagaatggacaaaaatcaagaaaaattcaaaattcagaaagtcaccaaatgaatagaaaatattttagaaacaaaatttgtaaataaaatgcg…	>FBtr0346120 type=three_prime_UTR; loc=X:complement(12760642..12761297);MD5=a0f00661b6a6164d21decb11f5b289de; length=656; parent=FBgn0030420; release=r6.38; species=Dmel;	385	c(449, 465)	-1	-1	FBgn0030420	3	1	2	0	0	CG12717
FBtr0073756	ctcggctcactcagcccaaccctagttagttgtatatagattatagatatatatatatatagatatacacaagatgtataaccttaccatcccgcaacaaccccgcttggccggcaatccaaaagattaaacgtgccagtcccaaagtattttagtaccaagatgtgtacccaacccactgaccctcgccaatatgcatatgtatgtatatatatatatatatgtatatatatgggcagtgggcttatatcttaagtttcgcccacttaaaacctagccagctaactgaacttgtaattatagtaaggactccctatttattatgactagtattactccacaaaagatcaacaaatctcacactcaccggagaaaacttcatccaaccagatggtcaat…	>FBtr0073756 type=three_prime_UTR; loc=X:13293879..13294433;MD5=05e6b738aebe83bb75f783c77836806e; length=555; parent=FBgn0030466; release=r6.38; species=Dmel;	-1	-1	-1	c(31, 205, 223)	FBgn0030466	3	0	0	0	3	CG15744
FBtr0309245	aatcgacccagcccatcgcaaatttgtaaatatgtatgaaataatgtgcaataatgtacaattgcccctaagtgttgtgatgcacccaattatgaatattattaatatatggcaattaattcacttgcgagtgaataatgtataatacaagttcgtattagcgggtgttttgtgtgaactgtacttgccggcgttgccaactcatttaattgcagaggttagctcgtgtgtccgtctctttctcgcctccgccttagccgcctcgctccgtttcgttttcatgtcctccgtttttttatttagagcctttaacgagcaactgtgtacatactgtgtatatgtttgagcctttttagccccctttttttatttcaatttgttgatttattatcgactatt…	>FBtr0309245 type=three_prime_UTR; loc=X:complement(join(13830741..13831100,13831168..13831278,13831340..13831634,13831702..13832156,13832217..13832673,13832746..13832840,13832904..13834641));MD5=a720447cdf6c205a682a0b37fdfd677c; length=3511; parent=FBgn0052626; release=r6.38; species=Dmel;	25	c(323, 1005)	-1	-1	FBgn0052626	3	1	2	0	0	AMPdeam
FBtr0073992	agattgaaagttcgtgtgaagcaggtggagcgttaaacactcaaacgttgttattgctatatgcaaatggtgtctaataatttacaataaagcaacctaaactatagtaaactaaatctagaataggtgacagatatgcatatatcgaaatatatatatatatatatatatttatgtatgtatagaagcagaggcacttaaagctgctctaaggcacccctagatgtaagcccgtttactttactgtggctagatcatgcctagcaggtattaactcatatatatatatatatatatatagtatatatttagtatatgcaagaagatctatatgtattgaaagtaaacacgtagtcattggttaccccgtcgccaattggcccagttaagcgttccagt…	>FBtr0073992 type=three_prime_UTR; loc=X:complement(14787478..14789669);MD5=8d24c44431771f1a65e098a617788f68; length=2192; parent=FBgn0003301; release=r6.38; species=Dmel;	664	1576	-1	1151	FBgn0003301	3	1	1	0	1	rut
FBtr0340467	agattgaaagttcgtgtgaagcaggtggagcgttaaacactcaaacgttgttattgctatatgcaaatggtgtctaataatttacaataaagcaacctaaactatagtaaactaaatctagaataggtgacagatatgcatatatcgaaatatatatatatatatatatatttatgtatgtatagaagcagaggcacttaaagctgctctaaggcacccctagatgtaagcccgtttactttactgtggctagatcatgcctagcaggtattaactcatatatatatatatatatatatagtatatatttagtatatgcaagaagatctatatgtattgaaagtaaacacgtagtcattggttaccccgtcgccaattggcccagttaagcgttccagt…	>FBtr0340467 type=three_prime_UTR; loc=X:complement(14787478..14789669);MD5=8d24c44431771f1a65e098a617788f68; length=2192; parent=FBgn0003301; release=r6.38; species=Dmel;	664	1576	-1	1151	FBgn0003301	3	1	1	0	1	rut
FBtr0305581	agattgaaagttcgtgtgaagcaggtggagcgttaaacactcaaacgttgttattgctatatgcaaatggtgtctaataatttacaataaagcaacctaaactatagtaaactaaatctagaataggtgacagatatgcatatatcgaaatatatatatatatatatatatttatgtatgtatagaagcagaggcacttaaagctgctctaaggcacccctagatgtaagcccgtttactttactgtggctagatcatgcctagcaggtattaactcatatatatatatatatatatatagtatatatttagtatatgcaagaagatctatatgtattgaaagtaaacacgtagtcattggttaccccgtcgccaattggcccagttaagcgttccagt…	>FBtr0305581 type=three_prime_UTR; loc=X:complement(14787478..14789669);MD5=8d24c44431771f1a65e098a617788f68; length=2192; parent=FBgn0003301; release=r6.38; species=Dmel;	664	1576	-1	1151	FBgn0003301	3	1	1	0	1	rut
FBtr0333654	agattgaaagttcgtgtgaagcaggtggagcgttaaacactcaaacgttgttattgctatatgcaaatggtgtctaataatttacaataaagcaacctaaactatagtaaactaaatctagaataggtgacagatatgcatatatcgaaatatatatatatatatatatatttatgtatgtatagaagcagaggcacttaaagctgctctaaggcacccctagatgtaagcccgtttactttactgtggctagatcatgcctagcaggtattaactcatatatatatatatatatatatagtatatatttagtatatgcaagaagatctatatgtattgaaagtaaacacgtagtcattggttaccccgtcgccaattggcccagttaagcgttccagt…	>FBtr0333654 type=three_prime_UTR; loc=X:complement(14787478..14789669);MD5=8d24c44431771f1a65e098a617788f68; length=2192; parent=FBgn0003301; release=r6.38; species=Dmel;	664	1576	-1	1151	FBgn0003301	3	1	1	0	1	rut
FBtr0333655	agattgaaagttcgtgtgaagcaggtggagcgttaaacactcaaacgttgttattgctatatgcaaatggtgtctaataatttacaataaagcaacctaaactatagtaaactaaatctagaataggtgacagatatgcatatatcgaaatatatatatatatatatatatttatgtatgtatagaagcagaggcacttaaagctgctctaaggcacccctagatgtaagcccgtttactttactgtggctagatcatgcctagcaggtattaactcatatatatatatatatatatatagtatatatttagtatatgcaagaagatctatatgtattgaaagtaaacacgtagtcattggttaccccgtcgccaattggcccagttaagcgttccagt…	>FBtr0333655 type=three_prime_UTR; loc=X:complement(14787478..14789669);MD5=8d24c44431771f1a65e098a617788f68; length=2192; parent=FBgn0003301; release=r6.38; species=Dmel;	664	1576	-1	1151	FBgn0003301	3	1	1	0	1	rut
FBtr0333656	cgacaccgaggacaacctggccgatgaggagtttgaggacgacgaagtgggtcgtgatgtgcgacagaagcgcctacaaaagtccgagctcaatcacaaacgatcggaggttgcaacagaggcaggcaatcaccacgacgacgaggtggaggaggaggacgacgatgacgacgaagaggaggaccaccggaatggcgggcgggaggcggcaccgctgactaacggcagcatgcgcggcctggaggccaatgtgataaacgacgagctgaagtatggagcaacccatctcaatcaccagtccatggactccaatccgttggagagccaatcggagtggtcggatgacgattgtcgtgaggaagcaacagggggagccgagtccacgggctacattacgga…	>FBtr0333656 type=three_prime_UTR; loc=X:complement(join(14787478..14790112,14790181..14790548));MD5=8369744b9a7ce8bba5632c62ef08978b; length=3003; parent=FBgn0003301; release=r6.38; species=Dmel;	1475	2387	-1	1962	FBgn0003301	3	1	1	0	1	rut
FBtr0333657	cgacaccgaggacaacctggccgatgaggagtttgaggacgacgaagtgggtcgtgatgtgcgacagaagcgcctacaaaagtccgagctcaatcacaaacgatcggaggttgcaacagaggcaggcaatcaccacgacgacgaggtggaggaggaggacgacgatgacgacgaagaggaggaccaccggaatggcgggcgggaggcggcaccgctgactaacggcagcatgcgcggcctggaggccaatgtgataaacgacgagctgaagtatggagcaacccatctcaatcaccagtccatggactccaatccgttggagagccaatcggagtggtcggatgacgattgtcgtgaggaagcaacagggggagccgagtccacgggctacattacgga…	>FBtr0333657 type=three_prime_UTR; loc=X:complement(join(14787478..14790112,14790181..14790548));MD5=8369744b9a7ce8bba5632c62ef08978b; length=3003; parent=FBgn0003301; release=r6.38; species=Dmel;	1475	2387	-1	1962	FBgn0003301	3	1	1	0	1	rut
FBtr0333718	attgttgtcagcgtcgagagacatctacatatgtatctaggggatgaatctgcaaaacgtagcttgctgacgatttaaccaaaccacaaacaatacccaaattctactttcaacaattgtaatttgatattattccggcaaaatccagaaatttacaaaaaaaaaagcaaagaaaaaacaaaaaacaaaccatgaaaatgatccttaaatcctagaaatccagaaatcaacaacgatgggaaatcgatacatttgaatcgcttgcgtattattgtagtcatatatatatataatctgaagcgttgaaactgatataaattcttaatatgtgaaaagcaactagtcgagatgcacatgatttctttaattccataagatgtttttcgtaatgtctacttc…	>FBtr0333718 type=three_prime_UTR; loc=X:15903800..15905667;MD5=bd890670d83e29c565579b6aece12cfb; length=1868; parent=FBgn0003392; release=r6.38; species=Dmel;	1476	1010	404	-1	FBgn0003392	3	1	1	1	0	shi
FBtr0074314	acacaactgagacgacgagcgacaatgcgaaagtcaggcccggatacaaaagtccagacctcgagcgagcgaaataatggcaatgggcagctcagaaataagaaagaaagaatggaaaaaacacgaaaaaaaaacgctgccaaagctggagtttcgagacgagcgcggcacacacttgcgcaatcgcagcaacaaaaccaagctgaccagctaattgtgcgagtgtacgagcgaatgagtgtgtgtgtggttgtgtgtgtgtgcaagcgacttgcgcgtgattttgaaatcggccaacaaccgctggggaacaaaacgtactcagtatgccagtattcaacttcaatttaagccagcgcacaaaagaaacgtattattttattcatcatcatcatcata…	>FBtr0074314 type=three_prime_UTR; loc=X:join(16643508..16643509,16647769..16649697);MD5=65543c1ed06a3dd88d368860fa01032e; length=1931; parent=FBgn0030766; release=r6.38; species=Dmel;	-1	1657	-1	c(1631, 1820)	FBgn0030766	3	0	1	0	2	mthl1
FBtr0340150	acacaactgagacgacgagcgacaatgcgaaagtcaggcccggatacaaaagtccagacctcgagcgagcgaaataatggcaatgggcagctcagaaataagaaagaaagaatggaaaaaacacgaaaaaaaaacgctgccaaagctggagtttcgagacgagcgcggcacacacttgcgcaatcgcagcaacaaaaccaagctgaccagctaattgtgcgagtgtacgagcgaatgagtgtgtgtgtggttgtgtgtgtgtgcaagcgacttgcgcgtgattttgaaatcggccaacaaccgctggggaacaaaacgtactcagtatgccagtattcaacttcaatttaagccagcgcacaaaagaaacgtattattttattcatcatcatcatcata…	>FBtr0340150 type=three_prime_UTR; loc=X:join(16643508..16643509,16647769..16650309);MD5=1be0511c55d5bf9f4daa4e694afc6ba8; length=2543; parent=FBgn0030766; release=r6.38; species=Dmel;	-1	1657	-1	c(1631, 1820)	FBgn0030766	3	0	1	0	2	mthl1
FBtr0074351	ggtggaagtggtggcgagggagggagttgaatggaactaatggagcagtagatggaggagagagaattaagagattttttcccaactggcagcgcaacggatttctgtacttgacccacttaaaataaccatatgcaaaaaaaactgtaacaacgacatcgataagtggtgttctggaaactctggtgttttcgaaagttcccagagcatttagctgaataccgccatatatccgtatgtcttattataaattgtaagctaactattagcttgtcatagcataatggcattgtatttactttgattttaagcagatagtattttaactcgcagagcctatcaaaaacgatatcgattctctcgcagtgtacatagagttttttttttttgaaacgcaca…	>FBtr0074351 type=three_prime_UTR; loc=X:complement(16826681..16827398);MD5=14a3bc7c92559155a2af82edf8ee08a3; length=718; parent=FBgn0030797; release=r6.38; species=Dmel;	-1	367	-1	c(416, 574)	FBgn0030797	3	0	1	0	2	CG13004
FBtr0112996	ggtggaagtggtggcgagggagggagttgaatggaactaatggagcagtagatggaggagagagaattaagagattttttcccaactggcagcgcaacggatttctgtacttgacccacttaaaataaccatatgcaaaaaaaactgtaacaacgacatcgataagtggtgttctggaaactctggtgttttcgaaagttcccagagcatttagctgaataccgccatatatccgtatgtcttattataaattgtaagctaactattagcttgtcatagcataatggcattgtatttactttgattttaagcagatagtattttaactcgcagagcctatcaaaaacgatatcgattctctcgcagtgtacatagagttttttttttttgaaacgcaca…	>FBtr0112996 type=three_prime_UTR; loc=X:complement(16826681..16827398);MD5=14a3bc7c92559155a2af82edf8ee08a3; length=718; parent=FBgn0030797; release=r6.38; species=Dmel;	-1	367	-1	c(416, 574)	FBgn0030797	3	0	1	0	2	CG13004
FBtr0308682	ggtggaagtggtggcgagggagggagttgaatggaactaatggagcagtagatggaggagagagaattaagagattttttcccaactggcagcgcaacggatttctgtacttgacccacttaaaataaccatatgcaaaaaaaactgtaacaacgacatcgataagtggtgttctggaaactctggtgttttcgaaagttcccagagcatttagctgaataccgccatatatccgtatgtcttattataaattgtaagctaactattagcttgtcatagcataatggcattgtatttactttgattttaagcagatagtattttaactcgcagagcctatcaaaaacgatatcgattctctcgcagtgtacatagagttttttttttttgaaacgcaca…	>FBtr0308682 type=three_prime_UTR; loc=X:complement(16826681..16827398);MD5=14a3bc7c92559155a2af82edf8ee08a3; length=718; parent=FBgn0030797; release=r6.38; species=Dmel;	-1	367	-1	c(416, 574)	FBgn0030797	3	0	1	0	2	CG13004
FBtr0074388	ctataggtgttggcgcaagcgcgcgccactcgcgatgtgctggccgaaaatcgggtcgttctcagcgaggtcaacgaggaggtggaagtattctacttcgccaccgagtgctgaacacattgcataatcgagggaattatttgtttaagttagataaagtgtaatttgcactaaaccacatgcataaggggtgggttggttaatgtaatcttgtctattcaacatgcaattaatatgagacaagaggaaatttattttatattatgaggtttaaatttgatttgtaactagctccaagccaaggaatggttgctatataatttaaattctatcctgattaaacaatatatgtatatatatatatatatatttatccgtgatatatgattaagcaaacaa…	>FBtr0074388 type=three_prime_UTR; loc=X:join(17194395..17195253,17200287..17200728);MD5=38ff7a34de36011ce86aea8b3bd7fba8; length=1301; parent=FBgn0000163; release=r6.38; species=Dmel;	-1	c(756, 903)	-1	350	FBgn0000163	3	0	2	0	1	baz
FBtr0346190	tcctccgcaggcaccgagaaggaagcagaggacaggcagcaaaatggaaatggcggcagtctatgtgattattacatactaacattaggagagcctatttttacgtctaagcattttactacttatccgttttggagaagcgctcactcatccagcgagccaaccatgcacccagccagcacctccatcccacacagtcaacgacaccagccacgaacacgccatcaccacacaatcctgtccagcggcccccaagcggcaactgtaaccattggttgattttcttattaattaatattaattgataacaatattcttattacttttttgagctatcgttagtaaacttgttgatagtttgagcggcccagtgccctcctctagttatatatatgtatg…	>FBtr0346190 type=three_prime_UTR; loc=X:complement(16956232..16957493);MD5=a6c2815579e2a30d7fcf993821d2d006; length=1262; parent=FBgn0030809; release=r6.38; species=Dmel;	-1	-1	-1	c(418, 599, 998)	FBgn0030809	3	0	0	0	3	Ubr1
FBtr0074592	catagttaaattattattattaatcttaggacaaaatgatgctaggaactgaaagaagtaaacgattgtatatagagtatatagagttgattaaattgtatatagagttgataggttaagaaaattgtatatagtttaacaatttaactttaataatatcttccttttagggattagaaattatatttgttattactcctttattagacaatttcaaggcctatgagtgagaaagtaatctgtgcaactaattaagttaaaaaaaaggtataacttctacattatctagatagttacgaactcaaatatactttaatttccgtg	>FBtr0074592 type=three_prime_UTR; loc=X:18500935..18501258;MD5=87b4cd750d6ae65773bb4939348bcd88; length=324; parent=FBgn0030931; release=r6.38; species=Dmel;	-1	-1	-1	c(67, 97, 126)	FBgn0030931	3	0	0	0	3	Xrcc2
FBtr0074795	aactagcaatttccattcttcaagcccaagcccgatgatgatcataccgctctggcttctcctcctcctcctcctcctcctccatgcggtgcactgtatataccgagattgtatatattgcaagttggaaatgcttccttgtttcgattgtgattgtttcttttgtacgctattccacactatattccgttttatataattccctcgctgggatttaagatgtgtaactctgagaatcgagctggtgttagtgatgtaagcgtaaagtagtcggcgcacagccacaagcgatggatgagcgtttagaaaagcttttagtgaataacacacccatacctgtagtagacctgcataccgcacaagtcccaaatcgcgcatagagaacttatagtaatttgt…	>FBtr0074795 type=three_prime_UTR; loc=X:19758758..19759280;MD5=d8733efcc8f7138eeb17ed45d28545dd; length=523; parent=FBgn0031069; release=r6.38; species=Dmel;	-1	-1	-1	c(95, 110, 510)	FBgn0031069	3	0	0	0	3	Abcd3
FBtr0335155	aactagcaatttccattcttcaagcccaagcccgatgatgatcataccgctctggcttctcctcctcctcctcctcctcctccatgcggtgcactgtatataccgagattgtatatattgcaagttggaaatgcttccttgtttcgattgtgattgtttcttttgtacgctattccacactatattccgttttatataattccctcgctgggatttaagatgtgtaactctgagaatcgagctggtgttagtgatgtaagcgtaaagtagtcggcgcacagccacaagcgatggatgagcgtttagaaaagcttttagtgaataacacacccatacctgtagtagacctgcataccgcacaagtcccaaatcgcgcatagagaacttatagtaatttgt…	>FBtr0335155 type=three_prime_UTR; loc=X:19758758..19759280;MD5=d8733efcc8f7138eeb17ed45d28545dd; length=523; parent=FBgn0031069; release=r6.38; species=Dmel;	-1	-1	-1	c(95, 110, 510)	FBgn0031069	3	0	0	0	3	Abcd3
FBtr0335156	aactagcaatttccattcttcaagcccaagcccgatgatgatcataccgctctggcttctcctcctcctcctcctcctcctccatgcggtgcactgtatataccgagattgtatatattgcaagttggaaatgcttccttgtttcgattgtgattgtttcttttgtacgctattccacactatattccgttttatataattccctcgctgggatttaagatgtgtaactctgagaatcgagctggtgttagtgatgtaagcgtaaagtagtcggcgcacagccacaagcgatggatgagcgtttagaaaagcttttagtgaataacacacccatacctgtagtagacctgcataccgcacaagtcccaaatcgcgcatagagaacttatagtaatttgt…	>FBtr0335156 type=three_prime_UTR; loc=X:19758758..19759280;MD5=d8733efcc8f7138eeb17ed45d28545dd; length=523; parent=FBgn0031069; release=r6.38; species=Dmel;	-1	-1	-1	c(95, 110, 510)	FBgn0031069	3	0	0	0	3	Abcd3
FBtr0335157	aactagcaatttccattcttcaagcccaagcccgatgatgatcataccgctctggcttctcctcctcctcctcctcctcctccatgcggtgcactgtatataccgagattgtatatattgcaagttggaaatgcttccttgtttcgattgtgattgtttcttttgtacgctattccacactatattccgttttatataattccctcgctgggatttaagatgtgtaactctgagaatcgagctggtgttagtgatgtaagcgtaaagtagtcggcgcacagccacaagcgatggatgagcgtttagaaaagcttttagtgaataacacacccatacctgtagtagacctgcataccgcacaagtcccaaatcgcgcatagagaacttatagtaatttgt…	>FBtr0335157 type=three_prime_UTR; loc=X:19758758..19759280;MD5=d8733efcc8f7138eeb17ed45d28545dd; length=523; parent=FBgn0031069; release=r6.38; species=Dmel;	-1	-1	-1	c(95, 110, 510)	FBgn0031069	3	0	0	0	3	Abcd3
FBtr0074870	atttaaggcgacaagtgtaaatatcgaactcttagcagctgttgttcagttatcggctttttatatgtacggcataatcgaaacgcaatagaactcttatgcatacccaaatcttaagctttaaagtcgtctcttaaggattcacactgatgcccttcgctggccgctagaacaaacccaagggggaaccgataatatgacaaccagagaactcaatggttaaccttgaaactagttaactaagcaaatatagtgaatactcgtactgttaaagaggaaagaatatgaaatacctatatttaccagatagcagatagatgtattcatgtacttacgcatatatacaatatgttacctacatagatatacacataattgatatacattacaaacgcgagt…	>FBtr0074870 type=three_prime_UTR; loc=3L:complement(20098084..20099023);MD5=8f0842112cfbc13b175be9d155770701; length=940; parent=FBgn0036935; release=r6.38; species=Dmel;	16	-1	-1	c(749, 889)	FBgn0036935	3	1	0	0	2	CG14186
FBtr0075133	aagcgcaggagacgtgtaatcgaatgatctatagtgaaatcagctagcccttaagatatatgccgatctaaacatagttgtagttaaaccgtacataagtgcaacgaatttattgaactgcaggagcgaaagcagaaagtcattaattcgtaaacggattgttagatacacaaacagccaacatacacgaagagtgtgcctaagattaagaaggttgacgggacacaagaacaatatattctatctgtctatggtaactgcatttgtatttctaaaacgaaacgaaagataacaatcttaactgctcaaagtaatgaaaactcttagactggcaagagactcaaatcacacttatttttttgctgatccatatttttgtacaaccttttgagcgatatt…	>FBtr0075133 type=three_prime_UTR; loc=3L:complement(18167745..18170010);MD5=7e7e819e1adf61a583c5c5380d7291ff; length=2266; parent=FBgn0003997; release=r6.38; species=Dmel;	-1	-1	-1	c(750, 1440, 1913)	FBgn0003997	3	0	0	0	3	hid
FBtr0345387	gctagaatcccgcccagcgcacgtacgtagcattaatcacatgaactataatgccaccacaaattgaactactgaaaacaacaggaaccgaatattcttagcgtaaccaataaagcaacctagagccacactttcgacgctccaatatgaagatacaactacctttgtacatttttaataatttaattgatttctatttttgatcttgcgttccaacctctaatgacaaatttttgttactaccccaaagtaaaccgaacgcagtccaagaccccagcctcaataaaaactttaagagaaacgatatactcgatataatgcgattgaaattatatagtccccgtccagtccagtgtacttggcacgtagagacagaaacccaaacagaaaatagaaatc…	>FBtr0345387 type=three_prime_UTR; loc=3L:17515731..17524740;MD5=7b84120468b7cb2deb4b177071320841; length=9010; parent=FBgn0036734; release=r6.38; species=Dmel;	-1	-1	7018	c(6998, 7392)	FBgn0036734	3	0	0	1	2	CG7564
FBtr0075435	gctcaccaaataccctgtacccttttggggggatccgaaagtgggcatggaaatcgtaggagcaggaaaatagttaaggaatattatggacaatttcttagtttctagcttaaagtaaacaaaaattgactttttaactttgacaagttagttcaagttagttcttgaatatttttcgaactacaaacttaacgattgatccttaacgattttagctattccttcagtcattgataataacttcttatttttagtttttattattttcgaaaaaagatcaccctacgatttgctcgcactttttggaggtccaaaaccatcgagccaccctactgtaaataggcgccctgtatatatatagtttgtaggtggggccgctctgtacatattacataatac…	>FBtr0075435 type=three_prime_UTR; loc=3L:16031342..16032752;MD5=0e0822e0be33d94f6fb42ce62665ab55; length=1411; parent=FBgn0044028; release=r6.38; species=Dmel;	334	381	-1	349	FBgn0044028	3	1	1	0	1	Notum
FBtr0075607	gtggggttagctttaagcagagggttaaaggcaaggttaagttggaagctggagaggattaggagaatcagtatttatatgattagctgttttctgaaagaatgattttagttcacgcgtttccattttattcttaatgaaaagcttttatttttcaagttccttacgcttcaagatggtaaagaatatttgtttatatgataaagtcaaaacgcatcataagaaccgtttaaagtccagaccacgatcttgttcagttatgaaaagtgatctggaatagctgctggccgaaaaaagaagtaccctcgctgaaaacaagtttaacttcctcgggtttcaaaataaagaacaagggggaattgcattcaatatgcaaatgcgagcgtttagcgataaaag…	>FBtr0075607 type=three_prime_UTR; loc=3L:15240162..15242832;MD5=5863134640a041607557df1f18216640; length=2671; parent=FBgn0029114; release=r6.38; species=Dmel;	2537	2371	-1	2137	FBgn0029114	3	1	1	0	1	Tollo
FBtr0306308	cggggttaaatctagaggttaagcagagagagatagaaaaaaaaaaaacagcaggagacaaactgcgcaaccagtgaatttataaagattaaacgaaaactctaaactaaacaaaaactatgaagttaaaaaagatgtgaagagtggcaggcagttagcatactttttgggatggttcacacagactgatacttttagttctttaaataaattaaaatttattaccctgtaaatagagccagaggagaaaacgaaatactataccttaaaatgggatttcaataattaaacaaccattgtaaaaaagacacaaacggtttttatgtaagggcctgtacatatttatatatattatagaaatctttaatttatttaatatttcatagctatcacaaatat…	>FBtr0306308 type=three_prime_UTR; loc=3L:15341770..15344315;MD5=8e20952c7d0a207f677ef5a4f5ce5c70; length=2546; parent=FBgn0036494; release=r6.38; species=Dmel;	c(228, 1672)	334	-1	-1	FBgn0036494	3	2	1	0	0	Toll-6
FBtr0345692	taacaataaatagatgtctttaaatacctatattgcatattaagtaatatatacagtttttgttagtaaaggagcgaagtattttaaattttagtttaaggttcaagaaaaaacaaaaaaacgaaaaatcaaattgatggaaatgaagtgctttgcgatcgtttctttattaataaccacaattctgacttggccacaaccgccgactgctgtgttgttacttttcgcctctgctggcaaccgaatcgtatcaaatttccatccatccgccatcgtttttccgctccccagttggccaaaagccatcagccatcaggccacgggcaacactcgaaatttatgtacgctgctcccagctcgctgaaagcaacacgaaagttaattaaacttgaaaataat…	>FBtr0345692 type=three_prime_UTR; loc=3L:complement(11319642..11320690);MD5=1d4f178c7dcd979153d3fc737dd81277; length=1049; parent=FBgn0036154; release=r6.38; species=Dmel;	-1	570	-1	c(582, 592)	FBgn0036154	3	0	1	0	2	CG6168
FBtr0301658	gccaaaaaaaggcaggggcgaagctgggagagagttggagaattgaagtggcagaataccataaattgtatatagtattattaattttaatgaaatgtgcactagacgccagtcgcgtacttcaaccaacattttcgtttcctcacacaaaccaacagcagcaacaagtaaaaatacacaaaaaaaaaaaacaaaaacaaaaaacaaaatggataaactattacaaacaacacactggatgagaaatcgaagcggaaatttgaatttgcccgtgttgaaaaacaatgaaatgtgatttaaaaattaattaattaaattaattggcatttaatttaaagctaactgagaaaaacccatgaaaactacaaaaaaaatgcacactaaagcgtaaaaattaac…	>FBtr0301658 type=three_prime_UTR; loc=3L:10874468..10876496;MD5=a8e4d6bcfb6a75ac8f3f5e91fbb96617; length=2029; parent=FBgn0026160; release=r6.38; species=Dmel;	-1	1917	-1	c(67, 996)	FBgn0026160	3	0	1	0	2	tna
FBtr0076536	ggcgtcgtccacaagcggcgcaagcagtcgagggcgtggcccaaggacacaggagtgaacagcgcgcgagagagtcaaacttggcagggcgctgaaaaaccacacaaaaaatagaaaagaaaaataaaacccagaaaccaaaacccgcaaaaaaaatacagaaaaataggcacaaaaaaacgaagcggaaacaaaactaattttaactagcgatatgaaaatgcagaggcaggagagtttatggtttaatacaattgcgggaaggacacacacacacacacacatattacaaggtcgaaagcaaagaatattgttaaatagatttacacagaatataaaagaaaacataaagaaaacaacattagcattaacaaccaaacgagtataaatgaatgaaga…	>FBtr0076536 type=three_prime_UTR; loc=3L:complement(9145838..9150950);MD5=3d60ae372a6f4b18908211ff185fcdd7; length=5113; parent=FBgn0004244; release=r6.38; species=Dmel;	1619	2249	-1	2421	FBgn0004244	3	1	1	0	1	Rdl
FBtr0333834	ggcgtcgtccacaagcggcgcaagcagtcgagggcgtggcccaaggacacaggagtgaacagcgcgcgagagagtcaaacttggcagggcgctgaaaaaccacacaaaaaatagaaaagaaaaataaaacccagaaaccaaaacccgcaaaaaaaatacagaaaaataggcacaaaaaaacgaagcggaaacaaaactaattttaactagcgatatgaaaatgcagaggcaggagagtttatggtttaatacaattgcgggaaggacacacacacacacacacatattacaaggtcgaaagcaaagaatattgttaaatagatttacacagaatataaaagaaaacataaagaaaacaacattagcattaacaaccaaacgagtataaatgaatgaaga…	>FBtr0333834 type=three_prime_UTR; loc=3L:complement(9145838..9150950);MD5=3d60ae372a6f4b18908211ff185fcdd7; length=5113; parent=FBgn0004244; release=r6.38; species=Dmel;	1619	2249	-1	2421	FBgn0004244	3	1	1	0	1	Rdl
FBtr0333835	ggcgtcgtccacaagcggcgcaagcagtcgagggcgtggcccaaggacacaggagtgaacagcgcgcgagagagtcaaacttggcagggcgctgaaaaaccacacaaaaaatagaaaagaaaaataaaacccagaaaccaaaacccgcaaaaaaaatacagaaaaataggcacaaaaaaacgaagcggaaacaaaactaattttaactagcgatatgaaaatgcagaggcaggagagtttatggtttaatacaattgcgggaaggacacacacacacacacacatattacaaggtcgaaagcaaagaatattgttaaatagatttacacagaatataaaagaaaacataaagaaaacaacattagcattaacaaccaaacgagtataaatgaatgaaga…	>FBtr0333835 type=three_prime_UTR; loc=3L:complement(9145838..9150950);MD5=3d60ae372a6f4b18908211ff185fcdd7; length=5113; parent=FBgn0004244; release=r6.38; species=Dmel;	1619	2249	-1	2421	FBgn0004244	3	1	1	0	1	Rdl
FBtr0333836	ggcgtcgtccacaagcggcgcaagcagtcgagggcgtggcccaaggacacaggagtgaacagcgcgcgagagagtcaaacttggcagggcgctgaaaaaccacacaaaaaatagaaaagaaaaataaaacccagaaaccaaaacccgcaaaaaaaatacagaaaaataggcacaaaaaaacgaagcggaaacaaaactaattttaactagcgatatgaaaatgcagaggcaggagagtttatggtttaatacaattgcgggaaggacacacacacacacacacatattacaaggtcgaaagcaaagaatattgttaaatagatttacacagaatataaaagaaaacataaagaaaacaacattagcattaacaaccaaacgagtataaatgaatgaaga…	>FBtr0333836 type=three_prime_UTR; loc=3L:complement(9145838..9150950);MD5=3d60ae372a6f4b18908211ff185fcdd7; length=5113; parent=FBgn0004244; release=r6.38; species=Dmel;	1619	2249	-1	2421	FBgn0004244	3	1	1	0	1	Rdl
FBtr0333223	cggcaaaatgaggcgattgctgcctaaaatcaaaacaaaagcaacacagccaaacgatagacacttgccgccgagaacatggaggagaggagtcgattcccagtccaaaaaatccctagaaaaccaccatccccatccgacgaaacccagagatgataactcagccaggaacaactattgaataatttttaagcgccaaacggcttttaagtgggcgtttgtctgtttgaaagtcaaagcattccaccaccgaaattaactaaaacaaaacaaaaacaattatttaataatactatagacaaacaaatatgtaacgtaactcaacggaaactagtctaaacaacaaaactgtagttaaagcagcagcggtatcgacgcaaaccagcaagttgaaagcaa…	>FBtr0333223 type=three_prime_UTR; loc=3L:8049924..8054147;MD5=9e3da0d7894f07addb2c5400e9d17e06; length=4224; parent=FBgn0011817; release=r6.38; species=Dmel;	3437	-1	-1	c(2292, 3951)	FBgn0011817	3	1	0	0	2	nmo
FBtr0336831	ggagtccttgctggttcatggcggatatttgagaattgtatataggtattaaacggtacgatacacgttggtatgtgtagataatatgtgagaaatagttattatatagcgcaacaacacaaacaataaaagaattactttaatttcgcaaagaaagaaaaaaaaaaccagcaggaaaatgattgatgcaaatggagatgcaacaaacactcaccaaacacaaacaataacaaatattactttatttttcaatgaaacgtaaagtgaggaaccttgaaagcagccaagaagttttataaagttttgataaatttttagacgattttactttagtttacgttgatttctgtcagtcttgagttcgattgatttcgattgattaggatcactgatagatca…	>FBtr0336831 type=three_prime_UTR; loc=2L:4875085..4876792;MD5=dc4c3690f042caeceef1437a05be9511; length=1708; parent=FBgn0051660; release=r6.38; species=Dmel;	823	-1	76	37	FBgn0051660	3	1	0	1	1	smog
FBtr0334265	gaaattctagttgggaaatcgcataaacaactgaaaatcagcactcaaatattttccactcacacgctaaattccatgatcatcgactgtaaacccattctaattatcattttaacttcccgctcgactgccagcagcagatcttttgaaaagtggccattttgaatactttttaatatattacttcgatgtaagcttagtttgaggaatacgacaaacgtgtgttgagttttattggcaacgaaacgaataccatataccataggattagagttccgatctatcattgctctagttcagcactttgttgacataatacactgagagaaatacagcccaaaatacacacacggattaaaaccatcactggacgagcactaaatgttacgatttaccatt…	>FBtr0334265 type=three_prime_UTR; loc=2L:4113803..4115749;MD5=9c6e02598ad97acb5e5a8dd2f50389e7; length=1947; parent=FBgn0000547; release=r6.38; species=Dmel;	c(1141, 1481)	-1	-1	1159	FBgn0000547	3	2	0	0	1	ed
FBtr0077869	acgctccccatttcgagatattcgagtgagagaacgcacacacacacagcagacccggtttgaattagatttagttggtagtttagcttgaatgtcgaaggttttcccactaatttccaattatcgcaacccgcagccttggagcaaagtgcaagattatcgtaagcagctctaaatgcctgttggtttaatcgctcgcaatagttaagttgccaaatcacacaaccaccactgttataaacatagtatcgtttagtgaaaagtataccctggaattcgtgttagttttagtttagttaagcgcccatttcatccgcctgcaatcctgggagcccggagtcgatcacctccctcctgtaaatagggcagctgcctctgcggactaccttaatttgtata…	>FBtr0077869 type=three_prime_UTR; loc=2L:complement(1975463..1976541);MD5=cc8dbe79c2db1668aa3ca3c1df0fb8c8; length=1079; parent=FBgn0031377; release=r6.38; species=Dmel;	c(356, 403, 650)	-1	-1	-1	FBgn0031377	3	3	0	0	0	CG15356
FBtr0332569	gaggtcgccggcggagcgcctgcgcctgcgccgcaccagagcagatgaagcccagccaggcgaaagtggagcacccaatgaggagaaagagagtgggccgggaggtcgagcccctgcggatgctgcgaatgcaataaactaaggctaaagtgcataattagacgagtggttgagatttagattttagtatgtttacgatttgtacgaatgcggttcttagcgattcataatgctgctttattgtacgcgattgactccacgggagacaatttggcaaaacacacacacacagagcgacacttacggacacataccgctttttgatgatcaattaaacatttttatgcaacgttgtacattgaagactcgatgagatcgaggcaatcgccttagcccggt…	>FBtr0332569 type=three_prime_UTR; loc=2L:1082872..1085380;MD5=51befeefcda8b21c7966db699c53a8f8; length=2509; parent=FBgn0031298; release=r6.38; species=Dmel;	-1	-1	-1	c(505, 521, 541)	FBgn0031298	3	0	0	0	3	Atg4a
FBtr0300326	acaggccaaactgaaagaggtctaatatataatggttttcaaaaccttttcaatagtctataataacatggggcgtttttctaaactcaaacaacagaactaatattaacagaagaggcagattaattctattaacatgagagtcttgtaagggaagacaacattctgggtgagctaaaaaacattttcttaaaaacactacatatgtcgtataattcagatttttttttatcgcaaaggatattaaaacgttttaaatttttaaaaataggttctgcaacgtgttatattcgcttgatatctaaaggtagatattaatatatttttgtccacaagcttgacgttataattttcaatgacgcaaaagtatttcgaaatccatttaggcagatttaccac…	>FBtr0300326 type=three_prime_UTR; loc=X:complement(283186..286582);MD5=547a6954f7c024b9d1cc96c9d8260eda; length=3397; parent=FBgn0040370; release=r6.38; species=Dmel;	-1	-1	-1	c(939, 2787)	FBgn0040370	2	0	0	0	2	CG13375
FBtr0070151	ccaacgactgatctccaagcaaattgactaagcacagttgccatttccatgagaagaggaggagcgcgtagggggagagtaccgggcgaggacatggtgaagcaccaggtgcagagaagcaggaataacaagggatggagactgagaatggctgcgctgctggcgtcgttgcctttgctgctgctgattccaagcaccttatagaaaccgtaggcttagatcttagtccaagtagatgatccctgatatacccgccctgggttttcatattcgggaagcaaagcaacaggctgaccaatttgttaatgcgaatccggatatataccagattgtaacttgttttgtttttgctttcttttccatttctctctttctctttgtgatcacttcccgtttctc…	>FBtr0070151 type=three_prime_UTR; loc=X:complement(648483..650049);MD5=612d29fbdb44f039590f541dbe9943e5; length=1567; parent=FBgn0025639; release=r6.38; species=Dmel;	-1	-1	-1	c(957, 1070)	FBgn0025639	2	0	0	0	2	Hmt4-20
FBtr0308652	ccaacgactgatctccaagcaaattgactaagcacagttgccatttccatgagaagaggaggagcgcgtagggggagagtaccgggcgaggacatggtgaagcaccaggtgcagagaagcaggaataacaagggatggagactgagaatggctgcgctgctggcgtcgttgcctttgctgctgctgattccaagcaccttatagaaaccgtaggcttagatcttagtccaagtagatgatccctgatatacccgccctgggttttcatattcgggaagcaaagcaacaggctgaccaatttgttaatgcgaatccggatatataccagattgtaacttgttttgtttttgctttcttttccatttctctctttctctttgtgatcacttcccgtttctc…	>FBtr0308652 type=three_prime_UTR; loc=X:complement(648891..650049);MD5=c3f35ce8ca2994e63735dd9c83e71043; length=1159; parent=FBgn0025639; release=r6.38; species=Dmel;	-1	-1	-1	c(957, 1070)	FBgn0025639	2	0	0	0	2	Hmt4-20
FBtr0070181	ttcacacttctcgggggcggaggaggcggatggtcctggccctggcaactggttgaagcatcgggcagcaacattggcaacgaggagtttttcgtgtgaggaggccagcggatgccgtgcgtttcacaatccgaatccgaaccggactccgatcccaaaatggagaacccagaacccgtcctctaatccctgagtctctgttgcgcagaggatcacttgtctctgagtttagttactatatatgtccagagttcccatccaaaccccatacgtagcgaggcactgtttttgattgcaattcgatggcatttgtagtttgtttttagagcgttgttaaatattactcaactgagtaatacatgtaagttaacaatgcttttataacgtttgtaatatccc…	>FBtr0070181 type=three_prime_UTR; loc=X:complement(1073906..1075502);MD5=cbf72541781fd6bd62f42337fb9980a2; length=1597; parent=FBgn0040397; release=r6.38; species=Dmel;	981	1182	-1	-1	FBgn0040397	2	1	1	0	0	CG3655
FBtr0113327	ttcacacttctcgggggcggaggaggcggatggtcctggccctggcaactggttgaagcatcgggcagcaacattggcaacgaggagtttttcgtgtgaggaggccagcggatgccgtgcgtttcacaatccgaatccgaaccggactccgatcccaaaatggagaacccagaacccgtcctctaatccctgagtctctgttgcgcagaggatcacttgtctctgagtttagttactatatatgtccagagttcccatccaaaccccatacgtagcgaggcactgtttttgattgcaattcgatggcatttgtagtttgtttttagagcgttgttaaatattactcaactgagtaatacatgtaagttaacaatgcttttataacgtttgtaatatccc…	>FBtr0113327 type=three_prime_UTR; loc=X:complement(1073041..1075502);MD5=584d33cb75c20bb4a84890bc49c47522; length=2462; parent=FBgn0040397; release=r6.38; species=Dmel;	981	1182	-1	-1	FBgn0040397	2	1	1	0	0	CG3655
FBtr0331339	ggaggccagcggatgccgtgcgtttcacaatccgaatccgaaccggactccgatcccaaaatggagaacccagaacccgtcctctaatccctgagtctctgttgcgcagaggatcacttgtctctgagtttagttactatatatgtccagagttcccatccaaaccccatacgtagcgaggcactgtttttgattgcaattcgatggcatttgtagtttgtttttagagcgttgttaaatattactcaactgagtaatacatgtaagttaacaatgcttttataacgtttgtaatatcccattgagtttggtcccttgtaaagatcttccgtcagaatgcatcgaaatctaagacagaagcagagcttactagtatggctagtgtatagaagaggcgtt…	>FBtr0331339 type=three_prime_UTR; loc=X:complement(1073906..1075403);MD5=1050c473e8090f42ba6aab8725e4470d; length=1498; parent=FBgn0040397; release=r6.38; species=Dmel;	882	1083	-1	-1	FBgn0040397	2	1	1	0	0	CG3655
FBtr0331340	ttcacacttctcgggggcggaggaggcggatggtcctggccctggcaactggttgaagcatcgggcagcaacattggcaacgaggagtttttcgtgtgaggaggccagcggatgccgtgcgtttcacaatccgaatccgaaccggactccgatcccaaaatggagaacccagaacccgtcctctaatccctgagtctctgttgcgcagaggatcacttgtctctgagtttagttactatatatgtccagagttcccatccaaaccccatacgtagcgaggcactgtttttgattgcaattcgatggcatttgtagtttgtttttagagcgttgttaaatattactcaactgagtaatacatgtaagttaacaatgcttttataacgtttgtaatatccc…	>FBtr0331340 type=three_prime_UTR; loc=X:complement(1073906..1075502);MD5=cbf72541781fd6bd62f42337fb9980a2; length=1597; parent=FBgn0040397; release=r6.38; species=Dmel;	981	1182	-1	-1	FBgn0040397	2	1	1	0	0	CG3655
FBtr0070188	atgggcggattgtgatcctcgatggctatggatttcgtgatttcgagttttcatttttattatttactttaacaagcaaaaacattcaatatagtgtgtgttcgtcacttgcacctccgatatttggtttgtatatatggacttagtttagctttgcaaattagtgataacatatacatatggaggatatatcccgctcgtaaatgtaaatgcaagcctcatactttgcgtaacttactctgtatatatatatatgtatgcagataaatatatatatatttacatttatgctgt	>FBtr0070188 type=three_prime_UTR; loc=X:complement(939170..939463);MD5=c7d8f32d2f7d9a817fcaa33a5bc7cd1c; length=294; parent=FBgn0040346; release=r6.38; species=Dmel;	-1	-1	-1	c(130, 241)	FBgn0040346	2	0	0	0	2	CG3704
FBtr0070250	atatgcattgagtaagaagtaccagcagtgtggtattgaccatctaggtgcttaatcagcatactaagtaggaacagcttagttcgaatgaaaaaacgaatgtaattgtaaatatgaaaactgaacaattaggtcataataattagcaatatttacttagatatctatactgcattatatgtagatgtacatatgtatctattgtacggaaagagtcgaaaactgaaaaattgaatctacagacttggctttggcagaaaacgccattaattaatgaatgataacatgcaaaaatgattaccgcatgcaaaacatgaaccggagacgtcggtcaaaaagtaacaacacaacaaagaaatgaatgaaaagtgaatgtcgctgctgctcttgcactttaat…	>FBtr0070250 type=three_prime_UTR; loc=X:complement(1213520..1213938);MD5=d2269bea150e30e03521fb5fa7387955; length=419; parent=FBgn0040366; release=r6.38; species=Dmel;	107	186	-1	-1	FBgn0040366	2	1	1	0	0	CG11398
FBtr0345522	atatgcattgagtaagaagtaccagcagtgtggtattgaccatctaggtgcttaatcagcatactaagtaggaacagcttagttcgaatgaaaaaacgaatgtaattgtaaatatgaaaactgaacaattaggtcataataattagcaatatttacttagatatctatactgcattatatgtagatgtacatatgtatctattgtacggaaagagtcgaaaactgaaaaattgaatctacagacttggctttggcagaaaacgccattaattaatgaatgataacatgcaaaaatgattaccgcatgcaaaacatgaaccggagacgtcggtcaaaaagtaacaacacaacaaagaaatgaatgaaaagtgaatgtcgctgctgctcttgcactttaat…	>FBtr0345522 type=three_prime_UTR; loc=X:complement(1211989..1213938);MD5=2577fed84a15d7b7925ac6c223e38f38; length=1950; parent=FBgn0040366; release=r6.38; species=Dmel;	107	186	-1	-1	FBgn0040366	2	1	1	0	0	CG11398
FBtr0333115	agccagagtggagagtaagatggccagttggtcaaacagacggccagactgtgacacaatcacatgacagagcgtattctcatacgtgtcctacctttatatgtatccgactgtatctgcggaaccgtgtgccttctatattcatacatatgtgaacgatttttgtggtgtgtagccttaagaacagtgtgcatgcacttgacgatttgtagtgggtgcggtggatctggaagtataaaatggaggagtaacgttgatcagcaccattgcttagggtcgtgagcttagtcagcctacttacatgtggcaataaatcaatagagaaactcgtgttcggagttcattttacgaatgatatttattgttgtggtttgttgtgatttaaatagaataattatt…	>FBtr0333115 type=three_prime_UTR; loc=X:1672757..1673608;MD5=f25cc503b088f14ab31c08c215b2d630; length=852; parent=FBgn0001189; release=r6.38; species=Dmel;	838	-1	-1	793	FBgn0001189	2	1	0	0	1	hfw
FBtr0302174	ttgcacgattcggcgcgctggcagtcaacatctacatcgtccacatccgatagatcccgatcccgaatccgattccgatccgatacggatacgaatacggacactcattaaggagctctgggtctccgtagttctgacagaccggtatgcaagtatgcgattcatggcgaaacgcggagcagaccacagccatagccacacccatacgcacacgttcatgttgagttattaatatgctgactggaacataggacggtataccgtataccgtatatgatataccatatacccaattagtgcaaatcacttacacacacacacgtatagtatatgattagccaggcgtacgcgtacatcctgcgttcataatcgtacattaactttcatacccacacactg…	>FBtr0302174 type=three_prime_UTR; loc=X:complement(join(1735945..1737163,1746274..1746390));MD5=f72e0b2e785bbd206265476d6bcfe6ab; length=1336; parent=FBgn0025391; release=r6.38; species=Dmel;	-1	888	1006	-1	FBgn0025391	2	0	1	1	0	Scgdelta
FBtr0345509	ttgcacgattcggcgcgctggcagtcaacatctacatcgtccacatccgatagatcccgatcccgaatccgattccgatccgatacggatacgaatacggacactcattaaggagctctgggtctccgtagttctgacagaccggtatgcaagtatgcgattcatggcgaaacgcggagcagaccacagccatagccacacccatacgcacacgttcatgttgagttattaatatgctgactggaacataggacggtataccgtataccgtatatgatataccatatacccaattagtgcaaatcacttacacacacacacgtatagtatatgattagccaggcgtacgcgtacatcctgcgttcataatcgtacattaactttcatacccacacactg…	>FBtr0345509 type=three_prime_UTR; loc=X:complement(join(1735945..1737163,1746274..1746390));MD5=f72e0b2e785bbd206265476d6bcfe6ab; length=1336; parent=FBgn0025391; release=r6.38; species=Dmel;	-1	888	1006	-1	FBgn0025391	2	0	1	1	0	Scgdelta
FBtr0070339	ccccagaaagcaacactataatccaaacaagaccaatccctagcaaatgcaaacgtacagccatcagcactcgaggtgaaactcttggcatacgcttgcatttctagggtggaagaaacccttaatctatgaatgcttttagcttgtttttgtgaaatctgttccatgtacataagttgcatcggtccgtgtatatactaactgacttcgttagggaatggcgccagcaagacggataccggatcccagatcccgtcggtttgggctcacgcttggaagcgagcgagatgacacgtttcagagacagagagagaggaccgaccgaaagccgtcggcagccgttccactgtacaaaatatttaatgtaagaccttcagcgaatatgaatataagaaatat…	>FBtr0070339 type=three_prime_UTR; loc=X:complement(2062313..2062734);MD5=41dffed0afb8d544ba31bb731931da61; length=422; parent=FBgn0025626; release=r6.38; species=Dmel;	-1	167	-1	190	FBgn0025626	2	0	1	0	1	CG4281
FBtr0070352	gctcgcaatcacctcaccgaccaacacgactgatctgtagatagatatcaaagttcggcgtcgatgcgcgcatgacaatgagcgactcaattgcagagcgaaaaggacagagcgctaagccaaagcggcaagcgcgaaagtacaagatgaagacagcgcgagaggaggggaacttagataacgaaagagaaccatcacctctaacggttttctgatatgttgccgatcatgatatttgcagtgctgtactttgtacttttctatcgtttaaattgtaagctatgtacatatatgtacgtacatatgtatgcaattaccaaaccatttccaggaatttcaacttcttgtacaatcatgtttaccagcgattttttaaagctcagttaagatatgataata…	>FBtr0070352 type=three_prime_UTR; loc=X:complement(join(1903704..1904281,1904493..1904540));MD5=1c8d1d0bfc74e328aff0c83adaf65fc8; length=626; parent=FBgn0023511; release=r6.38; species=Dmel;	-1	283	36	-1	FBgn0023511	2	0	1	1	0	Edem1
FBtr0305583	gctcgcaatcacctcaccgaccaacacgactgatctgtagatagatatcaaagttcggcgtcgatgcgcgcatgacaatgagcgactcaattgcagagcgaaaaggacagagcgctaagccaaagcggcaagcgcgaaagtacaagatgaagacagcgcgagaggaggggaacttagataacgaaagagaaccatcacctctaacggttttctgatatgttgccgatcatgatatttgcagtgctgtactttgtacttttctatcgtttaaattgtaagctatgtacatatatgtacgtacatatgtatgcaattaccaaaccatttccaggaatttcaacttcttgtacaatcatgtttaccagcgattttttaaagctcagttaagatatgataata…	>FBtr0305583 type=three_prime_UTR; loc=X:complement(join(1903704..1904281,1904493..1904540));MD5=1c8d1d0bfc74e328aff0c83adaf65fc8; length=626; parent=FBgn0023511; release=r6.38; species=Dmel;	-1	283	36	-1	FBgn0023511	2	0	1	1	0	Edem1
FBtr0345510	ccgtcgtcgcagctgctaaaccggcgttatttgttaaataaatctagatgttatggaaattatataatacctgctggataagagtagtcgtttcatcacccgattagttatattaacatacaagttactccgcgaggactgactaccagcttgctattggtgtgtcacctcaaaggcattatcccagtggacagaaatggtggactaggcactcacaccaatcgatttgaaaggcagtgcacttggcaaagtttccacttgattcacttaacgttgtcttcgtgtttggcgctcatatcgcttttatttgttaaattgcgtgtctaagtgtatatatcaataattcttgtatgttatgtatatgaactgttatgtacatatgcaaggcatgtaacacgt…	>FBtr0345510 type=three_prime_UTR; loc=X:complement(1876294..1876761);MD5=0c0b7309d65b3fa23cec8a5794afd4f1; length=468; parent=FBgn0026089; release=r6.38; species=Dmel;	-1	373	-1	329	FBgn0026089	2	0	1	0	1	CG14817
FBtr0342766	gtagatcacatatatttgcatttgtttgccaagcaaacaccccaatggcagggactgacaccaaggcggacatggacacaaccttgtaatacatatcagcaaagagcagaaatatggatattgaaatcgcagaggagacaaccttgccccgggcttccgcactgtacgccttttccatgggtgtggcccatatccgagcaccgttcctggtcagaaaaacaaacaaacaaacaaacaacaacaaatgagaacacttccaagaaatcaaagtaatgtttataaaacgactgcgtttagtgtatgcataggaattaggagcaaactacaataattcagacaaaaacaaacaaaaaaacaaagaattcaattttagtattaataaaagttataggttatact…	>FBtr0342766 type=three_prime_UTR; loc=X:2236596..2238045;MD5=a8c5af215f59cc67867466c964bc9b10; length=1450; parent=FBgn0003048; release=r6.38; species=Dmel;	-1	c(997, 1270)	-1	-1	FBgn0003048	2	0	2	0	0	pcx
FBtr0344153	gtagatcacatatatttgcatttgtttgccaagcaaacaccccaatggcagggactgacaccaaggcggacatggacacaaccttgtaatacatatcagcaaagagcagaaatatggatattgaaatcgcagaggagacaaccttgccccgggcttccgcactgtacgccttttccatgggtgtggcccatatccgagcaccgttcctggtcagaaaaacaaacaaacaaacaaacaacaacaaatgagaacacttccaagaaatcaaagtaatgtttataaaacgactgcgtttagtgtatgcataggaattaggagcaaactacaataattcagacaaaaacaaacaaaaaaacaaagaattcaattttagtattaataaaagttataggttatact…	>FBtr0344153 type=three_prime_UTR; loc=X:2236596..2237961;MD5=2ad1667b28c92fafccf7def55cfda553; length=1366; parent=FBgn0003048; release=r6.38; species=Dmel;	-1	c(997, 1270)	-1	-1	FBgn0003048	2	0	2	0	0	pcx
FBtr0332381	gtagatcacatatatttgcatttgtttgccaagcaaacaccccaatggcagggactgacaccaaggcggacatggacacaaccttgtaatacatatcagcaaagagcagaaatatggatattgaaatcgcagaggagacaaccttgccccgggcttccgcactgtacgccttttccatgggtgtggcccatatccgagcaccgttcctggtcagaaaaacaaacaaacaaacaaacaacaacaaatgagaacacttccaagaaatcaaagtaatgtttataaaacgactgcgtttagtgtatgcataggaattaggagcaaactacaataattcagacaaaaacaaacaaaaaaacaaagaattcaattttagtattaataaaagttataggttatact…	>FBtr0332381 type=three_prime_UTR; loc=X:2236596..2238045;MD5=a8c5af215f59cc67867466c964bc9b10; length=1450; parent=FBgn0003048; release=r6.38; species=Dmel;	-1	c(997, 1270)	-1	-1	FBgn0003048	2	0	2	0	0	pcx
FBtr0070401	acagcgacctgtacctgtacttacatatatcctgcgtgatcaacgtgatcctacatctatatactttttgttcttgtccctctgtacataagcgattcgcgaaggggacggctttggttgtccaccaaagtgaaagagagagagagagagagaaagagagagagatgggttgcctgccgacccgggagcgaaacttgcttctttccttggaactgacaaagtgcatttctgttaccacacacaaaacgactacaaactgtaaactaaactgcaacgcccatgtgtacataactgcatcataacttatatacgttaggcaagactactgaaactaaactaaactaaactaaactagctgatcgcaattacattatacacattatacttatactacaagag…	>FBtr0070401 type=three_prime_UTR; loc=X:2343432..2343870;MD5=cd39de73c67e8598d2b54a5d20045e91; length=439; parent=FBgn0003079; release=r6.38; species=Dmel;	-1	c(83, 283)	-1	-1	FBgn0003079	2	0	2	0	0	Raf
FBtr0344007	acagcgacctgtacctgtacttacatatatcctgcgtgatcaacgtgatcctacatctatatactttttgttcttgtccctctgtacataagcgattcgcgaaggggacggctttggttgtccaccaaagtgaaagagagagagagagagagaaagagagagagatgggttgcctgccgacccgggagcgaaacttgcttctttccttggaactgacaaagtgcatttctgttaccacacacaaaacgactacaaactgtaaactaaactgcaacgcccatgtgtacataactgcatcataacttatatacgttaggcaagactactgaaactaaactaaactaaactaaactagctgatcgcaattacattatacacattatacttatactacaagag…	>FBtr0344007 type=three_prime_UTR; loc=X:2343432..2343870;MD5=cd39de73c67e8598d2b54a5d20045e91; length=439; parent=FBgn0003079; release=r6.38; species=Dmel;	-1	c(83, 283)	-1	-1	FBgn0003079	2	0	2	0	0	Raf
FBtr0070403	gtttttgaaagtgaactgaggagagtcgggcaaaaattattgaagcagcgcacaagttatatattttttaaaccgttaacaatacattttgtgttgagtttgtatataatttcgataaagccaagatttagtaaaacttattttcacctcatccccgtgcttttaaagtgccccccccccccacatttttttaactaatcttagtttttgttatgaactatgtagttttttaaaagtttgttttagtcattaggtcacaagagaacccaaaaaattaacaagaaaacgaaaagcgcaaaatttatctatataaatatatatctatatatatatatgtatgttattatgccgatataatatttcttacgtcatagtgaaatatagtaaccaattttctaa…	>FBtr0070403 type=three_prime_UTR; loc=X:complement(2344949..2345533);MD5=e8c18386342676ab94aa026f81cf9ad9; length=585; parent=FBgn0003159; release=r6.38; species=Dmel;	-1	-1	-1	c(101, 530)	FBgn0003159	2	0	0	0	2	CG2841
FBtr0070404	gtttttgaaagtgaactgaggagagtcgggcaaaaattattgaagcagcgcacaagttatatattttttaaaccgttaacaatacattttgtgttgagtttgtatataatttcgataaagccaagatttagtaaaacttattttcacctcatccccgtgcttttaaagtgccccccccccccacatttttttaactaatcttagtttttgttatgaactatgtagttttttaaaagtttgttttagtcattaggtcacaagagaacccaaaaaattaacaagaaaacgaaaagcgcaaaatttatctatataaatatatatctatatatatatatgtatgttattatgccgatataatatttcttacgtcatagtgaaatatagtaaccaattttctaa…	>FBtr0070404 type=three_prime_UTR; loc=X:complement(2344949..2345533);MD5=e8c18386342676ab94aa026f81cf9ad9; length=585; parent=FBgn0003159; release=r6.38; species=Dmel;	-1	-1	-1	c(101, 530)	FBgn0003159	2	0	0	0	2	CG2841
FBtr0307284	gtttttgaaagtgaactgaggagagtcgggcaaaaattattgaagcagcgcacaagttatatattttttaaaccgttaacaatacattttgtgttgagtttgtatataatttcgataaagccaagatttagtaaaacttattttcacctcatccccgtgcttttaaagtgccccccccccccacatttttttaactaatcttagtttttgttatgaactatgtagttttttaaaagtttgttttagtcattaggtcacaagagaacccaaaaaattaacaagaaaacgaaaagcgcaaaatttatctatataaatatatatctatatatatatatgtatgttattatgccgatataatatttcttacgtcatagtgaaatatagtaaccaattttctaa…	>FBtr0307284 type=three_prime_UTR; loc=X:complement(2344949..2345533);MD5=e8c18386342676ab94aa026f81cf9ad9; length=585; parent=FBgn0003159; release=r6.38; species=Dmel;	-1	-1	-1	c(101, 530)	FBgn0003159	2	0	0	0	2	CG2841
FBtr0332962	aagtaccagtgaatccccgagcagcagacaaagattaaaatgtttagattttatataagacatttgcataccgtttttaagcgaacatttaggctatgacccatatgctaatctctaagctattattatataggaaggagcaggaagatgatcgggcggattggccagtattactcattaatggcagtcgcgatttgtacaaacaaaaatacacaaaaaattagttgtaggcaattgaaaaaaaaggaagaaaaaaaaaaacaaaaatcaaagaatttgtagtcaaaacagcagaaacaaacaaaaaaccagaacaatctataagttaaatttaaaaagcaaggaaaatcaactccatacttgttaacaaatcgacaaaaattcagttgtggtttccat…	>FBtr0332962 type=three_prime_UTR; loc=X:complement(2278031..2281577);MD5=cc6c5b95324cae7f2156cb3c9667e03c; length=3547; parent=FBgn0023526; release=r6.38; species=Dmel;	-1	474	-1	1716	FBgn0023526	2	0	1	0	1	CG2865
FBtr0305183	aaaccacacaaacagcaatcgctgcagcgtcagcgaaatcgaaatcagcaacatcggcgtcaatcacaatagcaacgtcagcaatatcggcagcaatctaacgagagcatccaacgtcggctgaaatcaggagagcagattggttggaatagagtgttctaaaagttaaaattttttttttttttgctgggctattgtttatatatctaccgatatcgtacacacactatatattattgcaataatgatacgctttaatgctaattaatgtaacgagtcgatagccgaactattgattaacttttgcaagcgcggcagccgaggatcagggtagacatctaacccatggggtcaccgttgtcaagaagtatcttcaggtgtttccagtgtgagtgcagg…	>FBtr0305183 type=three_prime_UTR; loc=X:4125995..4130016;MD5=f71b9ec698eec6f327955567a1b92b62; length=4022; parent=FBgn0026083; release=r6.38; species=Dmel;	-1	837	-1	3014	FBgn0026083	2	0	1	0	1	tyf
FBtr0345713	aaaccacacaaacagcaatcgctgcagcgtcagcgaaatcgaaatcagcaacatcggcgtcaatcacaatagcaacgtcagcaatatcggcagcaatctaacgagagcatccaacgtcggctgaaatcaggagagcagattggttggaatagagtgttctaaaagttaaaattttttttttttttgctgggctattgtttatatatctaccgatatcgtacacacactatatattattgcaataatgatacgctttaatgctaattaatgtaacgagtcgatagccgaactattgattaacttttgcaagcgcggcagccgaggatcagggtagacatctaacccatggggtcaccgttgtcaagaagtatcttcaggtgtttccagtgtgagtgcagg…	>FBtr0345713 type=three_prime_UTR; loc=X:4125995..4130016;MD5=f71b9ec698eec6f327955567a1b92b62; length=4022; parent=FBgn0026083; release=r6.38; species=Dmel;	-1	837	-1	3014	FBgn0026083	2	0	1	0	1	tyf
FBtr0070676	acacaatgtatctaagcactatgtaatccttaaaatatattacaataaagagatcagcttttttgctgatacatatgtacatatgtacatatg	>FBtr0070676 type=three_prime_UTR; loc=X:4544405..4544497;MD5=fb89e51b17091c4014f503e5e9abf2df; length=93; parent=FBgn0029710; release=r6.38; species=Dmel;	-1	c(76, 84)	-1	-1	FBgn0029710	2	0	2	0	0	CG3568
FBtr0308917	acaaaatctgcctgcgaaataggagtggatagacaaaaaaaaaaaaaaaaaaaatagaaatgaaaaacatatgggtggaccgattgggttgctggttacgggaataaacaaatatggaggcggcggatggacaagccctggcgccttcaacaaacatatacgcccatccaccaaagaatgacgtgcaacgtacacgcaacgcaacacacgcagtacaataaacggacatgacgagtgattccttgttatcgccgctctgttatatgttatataagaaaagcagcatatattacatatgtgtatcgatatgtgtatatggttatgtatatggctatgtatatgcatgtacatatatgcagtcgaacttgggtgactcaagccaagttgttggcctaaccg…	>FBtr0308917 type=three_prime_UTR; loc=X:complement(4544617..4546553);MD5=d5ca491633a9940af11bb0a81b0b8779; length=1937; parent=FBgn0029711; release=r6.38; species=Dmel;	-1	c(345, 1407)	-1	-1	FBgn0029711	2	0	2	0	0	Usf
FBtr0331603	atatcagaaagagagcgctccaactccgtgattaacatcgagatgctaacaataaggccggatcgattctggccaacctcattcgcaccccaaaaaccaacatcaacatttacatcaacatcaatgtctacgtcaaagtgtaaacccgaattcgaagtggccgagacagcgctgaggcaacgcgtgctatcgccgtcgttatcggagtttcaatcgaaatcgcaatcgagaccatcgtcacaaacgcaagagcacattttgcaaagggagatcataccgatggtaccgatcataccgatcataccagtgataccggaggacgccgaatcgttgggaaacaccaatacgaacagcaacagttcgcccgatcagcagaatgtgcccatgactataagtaca…	>FBtr0331603 type=three_prime_UTR; loc=X:5399698..5404204;MD5=ae0dd80d8d15ae74872962f15cfd7bc3; length=4507; parent=FBgn0029761; release=r6.38; species=Dmel;	668	3736	-1	-1	FBgn0029761	2	1	1	0	0	SK
FBtr0301953	atatcagaaagagagcgctccaactccgtgattaacatcgagatgctaacaataaggccggatcgattctggccaacctcattcgcaccccaaaaaccaacatcaacatttacatcaacatcaatgtctacgtcaaagtgtaaacccgaattcgaagtggccgagacagcgctgaggcaacgcgtgctatcgccgtcgttatcggagtttcaatcgaaatcgcaatcgagaccatcgtcacaaacgcaagagcacattttgcaaagggagatcataccgatggtaccgatcataccgatcataccagtgataccggaggacgccgaatcgttgggaaacaccaatacgaacagcaacagttcgcccgatcagcagaatgtgcccatgactataagtaca…	>FBtr0301953 type=three_prime_UTR; loc=X:5399698..5405138;MD5=791826619e8433941d436310230b60c5; length=5441; parent=FBgn0029761; release=r6.38; species=Dmel;	668	3736	-1	-1	FBgn0029761	2	1	1	0	0	SK
FBtr0344556	tagtagtagtcatagttatagtaataatagaggtaaaagtaatattagtaattctacaagtcgaatttcgaactcggccttttgtaaataagcctcttcgagatgagaaaaaagtcaaatgttagcatatacatattaatatacagaatacacacactatgtatcctatatctgtatacggatatatataggcctccccacaaaacatccaaaaagaaagcaaaaaaacaataagcgaaaaccgaacagaatatatgtatacatatatatgtcattgtgtaactttttttttttgtctaagttttaggctaaacgtatttgtaatatttcaccttgggccaaggcagcctgtacatgcatactaaaatacttaacataatatagcatgtaggggggagt…	>FBtr0344556 type=three_prime_UTR; loc=X:5400283..5404204;MD5=ee720f01c831395797fa113025aadbed; length=3922; parent=FBgn0029761; release=r6.38; species=Dmel;	83	3151	-1	-1	FBgn0029761	2	1	1	0	0	SK
FBtr0070799	taaggagatgggagagatgcccgtcgtgcgcatcactggggaactgggcgggagcaggtgcggatccgaggtatcgatggaggagcaacagcgtgaagttagattctaagttactcttacggaacctatgcgattacaaaaatgtacataaggggcgtgctccgggaattgttgcggccaaatgtccagctttgttttctaagcatccgtcgcgtgcaagggatttacaagaaattgatgaatagcgagcgagccaatcgtgaagaacagcttcattgatttctaaatccaccttgttagcgttaattaataaatattaatcatcgataattgtaaatataaaccgaactcacttataaatttacaccaccagatgcaatagaaataaaaaaaatcgca…	>FBtr0070799 type=three_prime_UTR; loc=X:5670147..5670555;MD5=2aee3e4290207bdf7d327b51ac649545; length=409; parent=FBgn0028474; release=r6.38; species=Dmel;	332	143	-1	-1	FBgn0028474	2	1	1	0	0	CG4119
FBtr0340463	taaggagatgggagagatgcccgtcgtgcgcatcactggggaactgggcgggagcaggtgcggatccgaggtatcgatggaggagcaacagcgtgaagttagattctaagttactcttacggaacctatgcgattacaaaaatgtacataaggggcgtgctccgggaattgttgcggccaaatgtccagctttgttttctaagcatccgtcgcgtgcaagggatttacaagaaattgatgaatagcgagcgagccaatcgtgaagaacagcttcattgatttctaaatccaccttgttagcgttaattaataaatattaatcatcgataattgtaaatataaaccgaactcacttataaatttacaccaccagatgcaatagaaataaaaaaaatcgca…	>FBtr0340463 type=three_prime_UTR; loc=X:5670147..5670652;MD5=758e6f6d08802e7dac36545ec470b23d; length=506; parent=FBgn0028474; release=r6.38; species=Dmel;	332	143	-1	-1	FBgn0028474	2	1	1	0	0	CG4119
FBtr0070826	tgcgtcttcataagtctcggtcgcctgcgagccgcatctggatctgcaactgcatctggattgagatcgataggatatacggataggggagagagatatagttaattacgtccagcttagcgagcagccagcaaaaccaatcaacccaaccagcccattccctcgtgtttcgatcaaaggccccaaaacgaaaactagccaaatttgtcaacttaaatgcaaagcagataggagtacgaaacgtttatccctatatagttctatatataacaccttgatagccactaagtcgagtcagtcagtcagttagtcagtcggtggagagtggagctggtgatcccgtcgttgaccaagccatgtcatgtgtccacgtaatgcgtacatgtaccacttgtattt…	>FBtr0070826 type=three_prime_UTR; loc=X:5910642..5911789;MD5=b5d1475e9a26521a48714fc61fcbf606; length=1148; parent=FBgn0029822; release=r6.38; species=Dmel;	-1	-1	-1	c(485, 730)	FBgn0029822	2	0	0	0	2	CG12236
FBtr0070884	gtcggctaagcatggagcacattcggaatggagctgctggatggattgtttgattgtattttgtggctttgctgccctgccactaattgacctcgggaaaagggattcgtcggaaagtttaggatacaactgatatagagataatgttaggaatggaaaagattcgaaggaactggagttcaacaatgatcagattaggattaggactagttttgtaagtgatgagcggcggagagcggaaatttatgtgttgaccaagtggcgagtcgaattctgtgtgttttgtatgccttattaatcaatgtggaccatccactccagcactaaagaacttcgaacaggagcgcatgatatagagcgagacggagatggagagtggaaagagaaagggatggatgg…	>FBtr0070884 type=three_prime_UTR; loc=X:complement(6082709..6083627);MD5=c254c2429fde6e4bb62e9ef9da3254df; length=919; parent=FBgn0026060; release=r6.38; species=Dmel;	-1	c(555, 797)	-1	-1	FBgn0026060	2	0	2	0	0	Mipp2
FBtr0332964	gggctgtggaaagtggaaaactgacgtcgataagaatcccgaaaccttggtcaacgcacgcaggttccttgcagagccgcagatgcagtcagcagtggagcaggtacggagcagcacccggctaccagatcttcagccggaggacgttcagcttatgtacacggtgtgcgctttcgagacggcctggcatcgcccacgtcacgactccggctcgaaatcttcatacgaatccgtgtggtgtaacttctttgatgtggccgccttggaggcgctggaattcttcgaggatcttgagtactattggaacgatggctacggctacgaactgactcatcgcattgcctgtccagcaatcgcagatatgtttgcggccattagttcctctgaggagacacggca…	>FBtr0332964 type=three_prime_UTR; loc=X:complement(join(6082659..6083790,6083854..6084054,6084223..6084600));MD5=b9b6958d8a23139c2fbdbc3060019644; length=1711; parent=FBgn0029840; release=r6.38; species=Dmel;	-1	c(1297, 1539)	-1	-1	FBgn0029840	2	0	2	0	0	raptor
FBtr0345895	gggctgtggaaagtggaaaactgacgtcgataagaatcccgaaaccttggtcaacgcacgcaggttccttgcagagccgcagatgcagtcagcagtggagcaggtacggagcagcacccggctaccagatcttcagccggaggacgttcagcttatgtacacggtgtgcgctttcgagacggcctggcatcgcccacgtcacgactccggctcgaaatcttcatacgaatccgtgtggtgtaacttctttgatgtggccgccttggaggcgctggaattcttcgaggatcttgagtactattggaacgatggctacggctacgaactgactcatcgcattgcctgtccagcaatcgcagatatgtttgcggccattagttcctctgaggagacacggca…	>FBtr0345895 type=three_prime_UTR; loc=X:complement(join(6082634..6083790,6083854..6084054,6084223..6084600));MD5=8853754f862e8bdad043a7c1d26d34e1; length=1736; parent=FBgn0029840; release=r6.38; species=Dmel;	-1	c(1297, 1539)	-1	-1	FBgn0029840	2	0	2	0	0	raptor
FBtr0078037	gactcaacccgggagaatccgcctcgcgccacctggcagaggcgctgagccagcgaacaaagagcagacgcggaggaaccgaaccgaaattagtccattttactaacaatagcgttaatctatgtatacataatgcacgccggagagcactctttgtgtacatagcccaaatatgtacacccgaaaggctccacgctgacgctagtcctcgcggatggcggaggcggactggggcgttgatatattcttttacatggtaactctactctaacgtttacggatacggatatttgtatttgccgtttgccctagaactctatacttgtactaagcgcccatgaacacttcatccactaacatagctactaatcctcatcctagtggaggatgcagttggtc…	>FBtr0078037 type=three_prime_UTR; loc=2L:complement(833587..834544);MD5=7f1b6235e1e4858a111de0cd222cdb70; length=958; parent=FBgn0020304; release=r6.38; species=Dmel;	-1	c(157, 759)	-1	-1	FBgn0020304	2	0	2	0	0	drongo
FBtr0302612	gactcaacccgggagaatccgcctcgcgccacctggcagaggcgctgagccagcgaacaaagagcagacgcggaggaaccgaaccgaaattagtccattttactaacaatagcgttaatctatgtatacataatgcacgccggagagcactctttgtgtacatagcccaaatatgtacacccgaaaggctccacgctgacgctagtcctcgcggatggcggaggcggactggggcgttgatatattcttttacatggtaactctactctaacgtttacggatacggatatttgtatttgccgtttgccctagaactctatacttgtactaagcgcccatgaacacttcatccactaacatagctactaatcctcatcctagtggaggatgcagttggtc…	>FBtr0302612 type=three_prime_UTR; loc=2L:complement(833584..834544);MD5=561a1f56eb0d944e387ebaf67db97260; length=961; parent=FBgn0020304; release=r6.38; species=Dmel;	-1	c(157, 759)	-1	-1	FBgn0020304	2	0	2	0	0	drongo
FBtr0302120	gactcaacccgggagaatccgcctcgcgccacctggcagaggcgctgagccagcgaacaaagagcagacgcggaggaaccgaaccgaaattagtccattttactaacaatagcgttaatctatgtatacataatgcacgccggagagcactctttgtgtacatagcccaaatatgtacacccgaaaggctccacgctgacgctagtcctcgcggatggcggaggcggactggggcgttgatatattcttttacatggtaactctactctaacgtttacggatacggatatttgtatttgccgtttgccctagaactctatacttgtactaagcgcccatgaacacttcatccactaacatagctactaatcctcatcctagtggaggatgcagttggtc…	>FBtr0302120 type=three_prime_UTR; loc=2L:complement(833584..834544);MD5=561a1f56eb0d944e387ebaf67db97260; length=961; parent=FBgn0020304; release=r6.38; species=Dmel;	-1	c(157, 759)	-1	-1	FBgn0020304	2	0	2	0	0	drongo
FBtr0302121	gactcaacccgggagaatccgcctcgcgccacctggcagaggcgctgagccagcgaacaaagagcagacgcggaggaaccgaaccgaaattagtccattttactaacaatagcgttaatctatgtatacataatgcacgccggagagcactctttgtgtacatagcccaaatatgtacacccgaaaggctccacgctgacgctagtcctcgcggatggcggaggcggactggggcgttgatatattcttttacatggtaactctactctaacgtttacggatacggatatttgtatttgccgtttgccctagaactctatacttgtactaagcgcccatgaacacttcatccactaacatagctactaatcctcatcctagtggaggatgcagttggtc…	>FBtr0302121 type=three_prime_UTR; loc=2L:complement(833584..834544);MD5=561a1f56eb0d944e387ebaf67db97260; length=961; parent=FBgn0020304; release=r6.38; species=Dmel;	-1	c(157, 759)	-1	-1	FBgn0020304	2	0	2	0	0	drongo
FBtr0343220	gaggggcgtggcactgggtgtacatatggaacgatagccatggaagtgggggttgttaggaagtgatttaagtgtatgttgtgtaaattaaagggaaacctatatataaaactaaactaaactagtttactgagctgcacatccttatttatttattaaatttgtatacgactgactacttaaactggatttaaaagttcaaagagcccggcgatattggtcctagctcatatactttgttttgtaaatagacaaaagcccattttcaagcactttttgttactaggttgtaagtcgataagcaggagggagacctagaaaatatcttaattatatttagtaaaattgtacagtcacctaaatgtatgtgaatgtgaacgtgtatgtgcgcgaatgtaa…	>FBtr0343220 type=three_prime_UTR; loc=2L:complement(583544..584178);MD5=c0c48528e2b9b86583ce74b5927e2a89; length=635; parent=FBgn0010323; release=r6.38; species=Dmel;	243	19	-1	-1	FBgn0010323	2	1	1	0	0	Gsc
FBtr0343221	gaggggcgtggcactgggtgtacatatggaacgatagccatggaagtgggggttgttaggaagtgatttaagtgtatgttgtgtaaattaaagggaaacctatatataaaactaaactaaactagtttactgagctgcacatccttatttatttattaaatttgtatacgactgactacttaaactggatttaaaagttcaaagagcccggcgatattggtcctagctcatatactttgttttgtaaatagacaaaagcccattttcaagcactttttgttactaggttgtaagtcgataagcaggagggagacctagaaaatatcttaattatatttagtaaaattgtacagtcacctaaatgtatgtgaatgtgaacgtgtatgtgcgcgaatgtaa…	>FBtr0343221 type=three_prime_UTR; loc=2L:complement(583544..584178);MD5=c0c48528e2b9b86583ce74b5927e2a89; length=635; parent=FBgn0010323; release=r6.38; species=Dmel;	243	19	-1	-1	FBgn0010323	2	1	1	0	0	Gsc
FBtr0347398	gaggggcgtggcactgggtgtacatatggaacgatagccatggaagtgggggttgttaggaagtgatttaagtgtatgttgtgtaaattaaagggaaacctatatataaaactaaactaaactagtttactgagctgcacatccttatttatttattaaatttgtatacgactgactacttaaactggatttaaaagttcaaagagcccggcgatattggtcctagctcatatactttgttttgtaaatagacaaaagcccattttcaagcactttttgttactaggttgtaagtcgataagcaggagggagacctagaaaatatcttaattatatttagtaaaattgtacagtcacctaaatgtatgtgaatgtgaacgtgtatgtgcgcgaatgtaa…	>FBtr0347398 type=three_prime_UTR; loc=2L:complement(583540..584178);MD5=6661d3da6b9f56f79afbe10fb083baa1; length=639; parent=FBgn0010323; release=r6.38; species=Dmel;	243	19	-1	-1	FBgn0010323	2	1	1	0	0	Gsc
FBtr0078234	gtcaattcttccaattggaacccaaagcttcaacccgaatacagatcgtgaactaaaatcaaatcagtgaaagatatacagttgttatggtttcggcttattatttttgaaatgtttaatgtacatagataaaactacttcaattggttactgttcttttgagaaaaagattataatacttattttctatgtaataccaaaaatatgtttaattatgttagaacttttgttaaatcaaaggtttctggttttgatttattattattttgaaactgatactgtttaaagtcctgtacttaaagcatctctatatacataaataatccatttcaaattatatgcattccaaaaacccaacgttgaacgagacatataatggaattttggtatataacatat…	>FBtr0078234 type=three_prime_UTR; loc=3L:complement(20407103..20407786);MD5=3be4c1c55c804b2fcbe9e762a20b9758; length=684; parent=FBgn0036984; release=r6.38; species=Dmel;	628	120	-1	-1	FBgn0036984	2	1	1	0	0	CG13248
FBtr0078242	acatcatttggcattgcctaatcgttttctttttagtatgtaaataatccgctaatccgccttgggattccgaccttgactggcgaaaagcaccaggccggattccatctccaaaatcaagtacaggaagggaaaactcgccattctgctgctcatcaaagacattgtcacagctgcgacagtggttccctcttcatcggcaattatttggtagtttgtttgcaggagtacatttccggtgccattcggtccagtttgcccttttttattgaacaaatatcggacgcccatatatgtacatatatattttatagtggatcacaattgcctattaaaatgaaaatcatgag	>FBtr0078242 type=three_prime_UTR; loc=3L:complement(20345736..20346085);MD5=3357b4595e108b5986b8a3142f1e2d76; length=350; parent=FBgn0036973; release=r6.38; species=Dmel;	39	295	-1	-1	FBgn0036973	2	1	1	0	0	Rbbp5
FBtr0078267	actggttgatcccgatccgaggtccctggggatcctatttggctgttgcaggcgcacgtctgcactgggtcggttgtgaaccgctggggcaggcgtcaaaatcaaatctcgccactgtgatttaacattaagtttatagtatacgagcaacgaaaggttctttgtatatatatatgtagcaatacgctggacagatgtgcttcctaatggtataagtaatactgtagctgtaggtcttgcaattccaacacttccaagtgcttccctatagcgttacacgcgattcttccaatcggcttagtgcgtagttaaattaatggtctagtctacgtttaagttatcttagattcagagagaccgcttgaccctctgctgtgtaatactgtaatgcagtctaat…	>FBtr0078267 type=three_prime_UTR; loc=3L:complement(20925891..20926399);MD5=aef0aa9559bb2e7faeb0dc7de4c32341; length=509; parent=FBgn0011591; release=r6.38; species=Dmel;	-1	-1	-1	c(163, 424)	FBgn0011591	2	0	0	0	2	fng
FBtr0078283	gtacacggcgaaaaaaccaagtgggaggagtcgccccaaaaaccctcgttgtttattttttgttacttaaagaaaatgtaaatttattcgtgtgctcgctcacacttagggaagtggaaagagatagggacagacaggttttgctggaaagagacagcctgaccaggtagttgcattgcactcgcacacatacacctatataccaccacacacacactcacactcacctattgagctcggatccaaaaattattttttatgaaaacgttaaaattgtaaatatatctttgagcttgtttgcaattgtattttaaagttagccggcggaagagccgtagaagtagtaatcattcccaccctcaaatgctattgtacatacaaattgttaagtctaagaat…	>FBtr0078283 type=three_prime_UTR; loc=3L:complement(20692330..20692835);MD5=f3d05d3a888b19a2d8bcb1278bcdc9be; length=506; parent=FBgn0001320; release=r6.38; species=Dmel;	275	371	-1	-1	FBgn0001320	2	1	1	0	0	kni
FBtr0344836	gtacacggcgaaaaaaccaagtgggaggagtcgccccaaaaaccctcgttgtttattttttgttacttaaagaaaatgtaaatttattcgtgtgctcgctcacacttagggaagtggaaagagatagggacagacaggttttgctggaaagagacagcctgaccaggtagttgcattgcactcgcacacatacacctatataccaccacacacacactcacactcacctattgagctcggatccaaaaattattttttatgaaaacgttaaaattgtaaatatatctttgagcttgtttgcaattgtattttaaagttagccggcggaagagccgtagaagtagtaatcattcccaccctcaaatgctattgtacatacaaattgttaagtctaagaat…	>FBtr0344836 type=three_prime_UTR; loc=3L:complement(20692330..20692835);MD5=f3d05d3a888b19a2d8bcb1278bcdc9be; length=506; parent=FBgn0001320; release=r6.38; species=Dmel;	275	371	-1	-1	FBgn0001320	2	1	1	0	0	kni
FBtr0078329	ggtccgggatctcagatcctttggatcatctaaaaaactaaatcaatcaaacgcagtcgcatgcttccgtttgcagaacttccactagctaactagctatatcacatcttcaaagaacaacagaatacagaaccgaaaggatctgaagctgaatcaacaccaagtaaccctgaatagaagttaacagaatcgaaaaacaacaacagaacaaccagagcaatagcagcagcagttaacgcaacgcacagattacttagcataatcaacaggaaaactaaacataaaccgatgaaccgatgaaagcggcggataaaacattatcgtctaccgataagtcttgaacagcaacagcattactatttattagtcgtcgagaatttgtaaaagtgtcaagtgcaa…	>FBtr0078329 type=three_prime_UTR; loc=3L:complement(20992814..20995703);MD5=e2a474af61887b80feb8a173ec6e45a1; length=2890; parent=FBgn0003415; release=r6.38; species=Dmel;	1713	609	-1	-1	FBgn0003415	2	1	1	0	0	skd
FBtr0078405	gcttcgacccaaacaaatgtcgggaaaacaaaccggaaaactgatacaattgtaaatagacaaaccaaaatgcgagaaagttgagagaagaattatgcagagaaatccacactaaatgttgctaagcattttctctttaggacttaactaatttattgtatttatttttagcgtaggttttagtttgttgttttattacaatgtttaatgtgcaagagtagtttaagcaagcgcaagtcgggtatttactaaatgactttatatatacataaattttcgctcattttttttatcagcattgcaatgattgaatattttcctatttaaattaaaaatttatttttctgcaatatcactttttaagattaatctggttgtcatttagtgaataggcgaaat…	>FBtr0078405 type=three_prime_UTR; loc=3L:complement(join(21306138..21306198,21315306..21316423));MD5=e506f91bbafaedddd647fb88debf9284; length=1179; parent=FBgn0003042; release=r6.38; species=Dmel;	51	1151	-1	-1	FBgn0003042	2	1	1	0	0	Pc
FBtr0078423	ctcctgtgagaacgggccgcatttattttgtttaatgaaaatgtacatacaaacttatattgatggcacagctcttgctcaaaaatgtaaatattgctaaataaaatatttatcaaattaaataattct	>FBtr0078423 type=three_prime_UTR; loc=3L:21636123..21636251;MD5=cc1740dfcd5793a1148b733b4cca621e; length=129; parent=FBgn0037110; release=r6.38; species=Dmel;	86	42	-1	-1	FBgn0037110	2	1	1	0	0	ORMDL
FBtr0078716	tgtacgacagttgggactaacatataactacttatatacataaacggagtgtgtatctaggctaaatcttgtactctatgtaggaaccgcatcaaaaccaacaaccaatacccaaaaattgaaaaataagcctcagggcagacacacaacacacacaatacagtagcctcaaaaaacgacatcagccagcaacaaaaacagcaacgtgaaagttatatatagttaactgatttaaagttaaccaagtgcggaatatatattcaaaagaaagtgaaaacaaatgttctaatgtccgcataatgaaataatcttatcaaatttgaaagcgggatttaccccttcaaatgcaaacacaccgagacacagacacagctaggattttcaaaatctttatttcaa…	>FBtr0078716 type=three_prime_UTR; loc=3R:5678802..5679930;MD5=97bae6b4f74d97085163358ff2d1744f; length=1129; parent=FBgn0037363; release=r6.38; species=Dmel;	c(823, 965)	-1	-1	-1	FBgn0037363	2	2	0	0	0	Atg17
FBtr0334946	tgtacgacagttgggactaacatataactacttatatacataaacggagtgtgtatctaggctaaatcttgtactctatgtaggaaccgcatcaaaaccaacaaccaatacccaaaaattgaaaaataagcctcagggcagacacacaacacacacaatacagtagcctcaaaaaacgacatcagccagcaacaaaaacagcaacgtgaaagttatatatagttaactgatttaaagttaaccaagtgcggaatatatattcaaaagaaagtgaaaacaaatgttctaatgtccgcataatgaaataatcttatcaaatttgaaagcgggatttaccccttcaaatgcaaacacaccgagacacagacacagctaggattttcaaaatctttatttcaa…	>FBtr0334946 type=three_prime_UTR; loc=3R:5678802..5679930;MD5=97bae6b4f74d97085163358ff2d1744f; length=1129; parent=FBgn0037363; release=r6.38; species=Dmel;	c(823, 965)	-1	-1	-1	FBgn0037363	2	2	0	0	0	Atg17
FBtr0078965	aacgcgtcttatatctacatatatatatatcacagttagcccgtattttcgtactcttagctgaatctaatgtaaattcatgtaaaagtgtgagctttaatctttaaagttgaagtattggcatatgtatgcgtatgcaatttagatagctcaaacaaactttaaaaattatgaacgcccgaggacattctacttaatttgcgtaacagaaaacccgaatccaacattcccattgcatccaacaacagtccgcccaaaaataacgtcggaaagttaagaacaaagccttcagacttcggcgactacccaatgatttcacgccttatccatcaaacaatagagatcaattattcgtgtatattaatatacactttttcgctgtaattagattaattgcgg…	>FBtr0078965 type=three_prime_UTR; loc=3R:4226862..4227518;MD5=917163422675e87f9d40b59456ef7e5c; length=657; parent=FBgn0037218; release=r6.38; species=Dmel;	-1	c(476, 544)	-1	-1	FBgn0037218	2	0	2	0	0	aux
FBtr0078966	aacgcgtcttatatctacatatatatatatcacagttagcccgtattttcgtactcttagctgaatctaatgtaaattcatgtaaaagtgtgagctttaatctttaaagttgaagtattggcatatgtatgcgtatgcaatttagatagctcaaacaaactttaaaaattatgaacgcccgaggacattctacttaatttgcgtaacagaaaacccgaatccaacattcccattgcatccaacaacagtccgcccaaaaataacgtcggaaagttaagaacaaagccttcagacttcggcgactacccaatgatttcacgccttatccatcaaacaatagagatcaattattcgtgtatattaatatacactttttcgctgtaattagattaattgcgg…	>FBtr0078966 type=three_prime_UTR; loc=3R:4226862..4227518;MD5=917163422675e87f9d40b59456ef7e5c; length=657; parent=FBgn0037218; release=r6.38; species=Dmel;	-1	c(476, 544)	-1	-1	FBgn0037218	2	0	2	0	0	aux
FBtr0336705	aacgcgtcttatatctacatatatatatatcacagttagcccgtattttcgtactcttagctgaatctaatgtaaattcatgtaaaagtgtgagctttaatctttaaagttgaagtattggcatatgtatgcgtatgcaatttagatagctcaaacaaactttaaaaattatgaacgcccgaggacattctacttaatttgcgtaacagaaaacccgaatccaacattcccattgcatccaacaacagtccgcccaaaaataacgtcggaaagttaagaacaaagccttcagacttcggcgactacccaatgatttcacgccttatccatcaaacaatagagatcaattattcgtgtatattaatatacactttttcgctgtaattagattaattgcgg…	>FBtr0336705 type=three_prime_UTR; loc=3R:4226862..4227518;MD5=917163422675e87f9d40b59456ef7e5c; length=657; parent=FBgn0037218; release=r6.38; species=Dmel;	-1	c(476, 544)	-1	-1	FBgn0037218	2	0	2	0	0	aux
FBtr0336706	aacgcgtcttatatctacatatatatatatcacagttagcccgtattttcgtactcttagctgaatctaatgtaaattcatgtaaaagtgtgagctttaatctttaaagttgaagtattggcatatgtatgcgtatgcaatttagatagctcaaacaaactttaaaaattatgaacgcccgaggacattctacttaatttgcgtaacagaaaacccgaatccaacattcccattgcatccaacaacagtccgcccaaaaataacgtcggaaagttaagaacaaagccttcagacttcggcgactacccaatgatttcacgccttatccatcaaacaatagagatcaattattcgtgtatattaatatacactttttcgctgtaattagattaattgcgg…	>FBtr0336706 type=three_prime_UTR; loc=3R:4226862..4227518;MD5=917163422675e87f9d40b59456ef7e5c; length=657; parent=FBgn0037218; release=r6.38; species=Dmel;	-1	c(476, 544)	-1	-1	FBgn0037218	2	0	2	0	0	aux
FBtr0079009	tgctgtagcttgtcctagacgtaatcttagactgtaaatagttgtggaaaagtgcctgcaaatgttttaaacgccagacgaatgtatttgaccccaggctttgtgcaatgcaatagcaacaggcttgtaaataccaaaacttttgctcctctagtttaagattcttattttaatcagaacataaatgcaatcaaacg	>FBtr0079009 type=three_prime_UTR; loc=2L:5054379..5054575;MD5=8c3978f26b06fdd756d64c3fe08efd23; length=197; parent=FBgn0031676; release=r6.38; species=Dmel;	c(33, 126)	-1	-1	-1	FBgn0031676	2	2	0	0	0	senju
FBtr0111024	ctggatggcaacgacgccggaacgcccgacaacaactaaatacaactcaactcaacggatcctactaactatactgagaacttccaatttatgtttaatcctagccggctcctgttttcgacgtttatgtagcctaagttcaagcggattcaatatccctctctctctctctatctttgtgtgcgtgaatgtgtgtaggcggccggaggagtccttcggcagcaggatgtcttcccaaaatcttgatgcgcgtgtgtgaatgtatagatctgtttacatgatgtgcatgtatatgtgtttatataggcaggcaattctacgatttacctaggtatactatgtaattgtaatgtatatttacattagcttcgaccaagtaccaataaattggcatttaac…	>FBtr0111024 type=three_prime_UTR; loc=2L:complement(5072170..5073882);MD5=54d97a43ef4ebc1a253ba0e14ef10ebc; length=1713; parent=FBgn0031681; release=r6.38; species=Dmel;	c(862, 1105)	-1	-1	-1	FBgn0031681	2	2	0	0	0	Pgant5
FBtr0079026	ctggatggcaacgacgccggaacgcccgacaacaactaaatacaactcaactcaacggatcctactaactatactgagaacttccaatttatgtttaatcctagccggctcctgttttcgacgtttatgtagcctaagttcaagcggattcaatatccctctctctctctctatctttgtgtgcgtgaatgtgtgtaggcggccggaggagtccttcggcagcaggatgtcttcccaaaatcttgatgcgcgtgtgtgaatgtatagatctgtttacatgatgtgcatgtatatgtgtttatataggcaggcaattctacgatttacctaggtatactatgtaattgtaatgtatatttacattagcttcgaccaagtaccaataaattggcatttaac…	>FBtr0079026 type=three_prime_UTR; loc=2L:complement(5072170..5073882);MD5=54d97a43ef4ebc1a253ba0e14ef10ebc; length=1713; parent=FBgn0031681; release=r6.38; species=Dmel;	c(862, 1105)	-1	-1	-1	FBgn0031681	2	2	0	0	0	Pgant5
FBtr0079070	gcaagcccctgtccaagctggacaggatcacgactaggcggatcaggagagagagcgaagagacagaggctctgaagggatcagagtcgggggagcagagcagtagatggcaaagcagagagttccatggcgccagtagttctcctggacaaagaagttggtttaagcatatgttagtagagatgtccaaaaccgagtgataactattagataccgatgcatgcatgtctccatctctatgtagaactctagggccaggtctggaccacaaggatttgacacaagaccctgtggcccgaaactggccaacacttatctgtgtgtatgtttatctatccactgtattgagtcttgtaatcgtgaatgtttaactatatagatctcgtcaactcggagcta…	>FBtr0079070 type=three_prime_UTR; loc=2L:5309721..5310625;MD5=5d99ce132474753b8f9384451da893b0; length=905; parent=FBgn0016076; release=r6.38; species=Dmel;	-1	c(626, 689)	-1	-1	FBgn0016076	2	0	2	0	0	vri
FBtr0079071	gcaagcccctgtccaagctggacaggatcacgactaggcggatcaggagagagagcgaagagacagaggctctgaagggatcagagtcgggggagcagagcagtagatggcaaagcagagagttccatggcgccagtagttctcctggacaaagaagttggtttaagcatatgttagtagagatgtccaaaaccgagtgataactattagataccgatgcatgcatgtctccatctctatgtagaactctagggccaggtctggaccacaaggatttgacacaagaccctgtggcccgaaactggccaacacttatctgtgtgtatgtttatctatccactgtattgagtcttgtaatcgtgaatgtttaactatatagatctcgtcaactcggagcta…	>FBtr0079071 type=three_prime_UTR; loc=2L:5309721..5310996;MD5=f27dbe8b29e62b7b7506ef18ee239262; length=1276; parent=FBgn0016076; release=r6.38; species=Dmel;	-1	c(626, 689)	-1	-1	FBgn0016076	2	0	2	0	0	vri
FBtr0300020	gcaagcccctgtccaagctggacaggatcacgactaggcggatcaggagagagagcgaagagacagaggctctgaagggatcagagtcgggggagcagagcagtagatggcaaagcagagagttccatggcgccagtagttctcctggacaaagaagttggtttaagcatatgttagtagagatgtccaaaaccgagtgataactattagataccgatgcatgcatgtctccatctctatgtagaactctagggccaggtctggaccacaaggatttgacacaagaccctgtggcccgaaactggccaacacttatctgtgtgtatgtttatctatccactgtattgagtcttgtaatcgtgaatgtttaactatatagatctcgtcaactcggagcta…	>FBtr0300020 type=three_prime_UTR; loc=2L:5309721..5310610;MD5=ed42f3a75e4a7e95ba7d2f49bc188c1b; length=890; parent=FBgn0016076; release=r6.38; species=Dmel;	-1	c(626, 689)	-1	-1	FBgn0016076	2	0	2	0	0	vri
FBtr0342936	gcaagcccctgtccaagctggacaggatcacgactaggcggatcaggagagagagcgaagagacagaggctctgaagggatcagagtcgggggagcagagcagtagatggcaaagcagagagttccatggcgccagtagttctcctggacaaagaagttggtttaagcatatgttagtagagatgtccaaaaccgagtgataactattagataccgatgcatgcatgtctccatctctatgtagaactctagggccaggtctggaccacaaggatttgacacaagaccctgtggcccgaaactggccaacacttatctgtgtgtatgtttatctatccactgtattgagtcttgtaatcgtgaatgtttaactatatagatctcgtcaactcggagcta…	>FBtr0342936 type=three_prime_UTR; loc=2L:5309721..5310996;MD5=f27dbe8b29e62b7b7506ef18ee239262; length=1276; parent=FBgn0016076; release=r6.38; species=Dmel;	-1	c(626, 689)	-1	-1	FBgn0016076	2	0	2	0	0	vri
FBtr0346579	gcaagcccctgtccaagctggacaggatcacgactaggcggatcaggagagagagcgaagagacagaggctctgaagggatcagagtcgggggagcagagcagtagatggcaaagcagagagttccatggcgccagtagttctcctggacaaagaagttggtttaagcatatgttagtagagatgtccaaaaccgagtgataactattagataccgatgcatgcatgtctccatctctatgtagaactctagggccaggtctggaccacaaggatttgacacaagaccctgtggcccgaaactggccaacacttatctgtgtgtatgtttatctatccactgtattgagtcttgtaatcgtgaatgtttaactatatagatctcgtcaactcggagcta…	>FBtr0346579 type=three_prime_UTR; loc=2L:5309721..5311223;MD5=1e07dec65cfdf128c0a432e4bed1cfdc; length=1503; parent=FBgn0016076; release=r6.38; species=Dmel;	-1	c(626, 689)	-1	-1	FBgn0016076	2	0	2	0	0	vri
FBtr0307040	ccagagttttgcgccttggctaaaggcttgaaccatccgagcgatgcacacgaagacgatctgctggagctattcaaagactttgagcagcaacagcagccgcatcagcagcagcagcaacagctggagatcagcagcagcagctttcctttagcccaggcgcaggacgaggacggtgatgagatggccgaatatgagaatctggcgcgagcagccggtggttacatggaggaggccgatcatttgctgtcctaccacagtagcagcagtgccgcggatgttgaggtggatgaggtgctgatgccggagctggacaatgccacggccttggactgcgccagctttgtcgactacgatgagttcaatctgtgcctgaacaacatcctcagcgaggaggac…	>FBtr0307040 type=three_prime_UTR; loc=2L:complement(5316238..5317812);MD5=70a40749a4bbce9ad9b6c4954226e98b; length=1575; parent=FBgn0031698; release=r6.38; species=Dmel;	1179	-1	-1	629	FBgn0031698	2	1	0	0	1	Ncoa6
FBtr0079146	actgtgttacacccaaacaagatcagtcaatgtatattgtaaatactatatatacccgcatagatcaaatcaaccagtcatcttcaccaaggcctataaagctggcattatatagatatatgcataaagtcagaaaaatcgttccacgtcaactgcattactttttcctctaattctcgcaagtgtttttcaatgtgtacagtgcttaagtgttagataatcgaaccaaaacaaagagtgtcataattgttgaacctaattggaattgttaaaataaatataaattaaatacaagttctttgtacataccaaccaaaagtgttcccaactcatttaacattcaaaattggcagctgcaaatcggcaaagagcagtacgtacaaaaactccaaaattaat…	>FBtr0079146 type=three_prime_UTR; loc=2L:5947891..5948313;MD5=39ae85ba60f0b70fc6213d229f8862c2; length=423; parent=FBgn0001128; release=r6.38; species=Dmel;	38	301	-1	-1	FBgn0001128	2	1	1	0	0	Gpdh1
FBtr0333229	actgtgttacacccaaacaagatcagtcaatgtatattgtaaatactatatatacccgcatagatcaaatcaaccagtcatcttcaccaaggcctataaagctggcattatatagatatatgcataaagtcagaaaaatcgttccacgtcaactgcattactttttcctctaattctcgcaagtgtttttcaatgtgtacagtgcttaagtgttagataatcgaaccaaaacaaagagtgtcataattgttgaacctaattggaattgttaaaataaatataaattaaatacaagttctttgtacataccaaccaaaagtgttcccaactcatttaacattcaaaattggcagctgcaaatcggcaaagagcagtacgtacaaaaactccaaaattaat…	>FBtr0333229 type=three_prime_UTR; loc=2L:5947891..5948843;MD5=f52a06c7006232f1434b3e1cdfa4ab38; length=953; parent=FBgn0001128; release=r6.38; species=Dmel;	38	301	-1	-1	FBgn0001128	2	1	1	0	0	Gpdh1
FBtr0079150	gacacctggttaagtggactcttcgatgagtgagtcagcataagaagtgtactgtatatagataattaatagaaatagataatagtttataaagacatccgatttaaaacagaaatgaaaaacctctatgccgaaattatcaagtagatagcactaacagataagtcgaaaataaatccgaccgagtttaaatgcatataacatttataactcacgtgtgaatattatttaattagcaaacaaaattccttgacaatattgtagttcttttgtttccaataatattattcatgtgtaaatag	>FBtr0079150 type=three_prime_UTR; loc=2L:complement(5955312..5955613);MD5=6c3a34af244ffa99b4bb7129caff6c7f; length=302; parent=FBgn0031753; release=r6.38; species=Dmel;	294	-1	-1	53	FBgn0031753	2	1	0	0	1	CG13999
FBtr0301235	taactaatactgaagccaagctgaggtcagtcccgattgaacgggaaggaggaaaaggcgaaaagactacaaccaacttcactattactatttgcaatgctatagatcggttgtgttgactaccggttcccattccctctatagcattgaatgcgcacttcaagtgcgtgttttacaattagctagagacttagccctagaactatagagcattatgtagttaggcttagctataggtcaggacgtgtaacgccatgggggcctattgggttttaccgcgttctgggttatctttttctactctgcaaagccttgagagcatggcttacatagacttaacgtagttaaatgtggcttttaggtatcatggtgtattccatttagctggccattcttaag…	>FBtr0301235 type=three_prime_UTR; loc=2L:complement(5767002..5769315);MD5=66e8f816de6b0d677be555b0918afef1; length=2314; parent=FBgn0031738; release=r6.38; species=Dmel;	491	-1	-1	1930	FBgn0031738	2	1	0	0	1	CG9171
FBtr0339237	attaagataaatctctagcaaagaaatccccccgagcaaacggaaaacataaatatccttagaaacaattttggatttttccaaagatttttgaaaacaaaaaaaaaaaaaaaacaatgaaatcgctgtgtaaataagacgatatcgcccaattagaaagcggaacagggatgtatatcatcatcctgaacggaaacggtttgaatttgtggatctataagatcgtttttgcagagcagagaagtcactgctcgacggttttttctgttgttctgcgagtgcaaattgccagaactgaaattaagtataactttatatagatgaattttggtaaaactaagtagtaagaatttataggataatacaataaatcccggagatcaaaaaagaaaaaaaaaa…	>FBtr0339237 type=three_prime_UTR; loc=2L:6755298..6756133;MD5=8783419db13e333ab35016a2eedf0eaf; length=836; parent=FBgn0031855; release=r6.38; species=Dmel;	129	728	-1	-1	FBgn0031855	2	1	1	0	0	meng
FBtr0331187	aggggcctaggatcaactagatatatttggtgcgtaaatatattgaaatgcgtaactacatggaaagcaaataatgatgcgaaatgtgaaaacacccaactcaaacgattaaatctaacacccacccagcattcccatggctctccttcgtactgtaccccacccgccttgaaaaatggttaggaagtcaaggatgataatgataatgaaagattgggtctgtcccaacttccccaacaaaatatgatgaagtacacaagttattactaactttgttttatttttggttaaattcattttaagttttataacacaagaaaatataaatatattttaattacacctatatggcatagaaatgcaattcaaatgctcaatattcacttcaagaaaattgct…	>FBtr0331187 type=three_prime_UTR; loc=2L:complement(6632798..6634810);MD5=74941d7a86e304c6416e0bb66a4202e8; length=2013; parent=FBgn0051635; release=r6.38; species=Dmel;	1454	-1	-1	1614	FBgn0051635	2	1	0	0	1	CG31635
FBtr0331191	aggggcctaggatcaactagatatatttggtgcgtaaatatattgaaatgcgtaactacatggaaagcaaataatgatgcgaaatgtgaaaacacccaactcaaacgattaaatctaacacccacccagcattcccatggctctccttcgtactgtaccccacccgccttgaaaaatggttaggaagtcaaggatgataatgataatgaaagattgggtctgtcccaacttccccaacaaaatatgatgaagtacacaagttattactaactttgttttatttttggttaaattcattttaagttttataacacaagaaaatataaatatattttaattacacctatatggcatagaaatgcaattcaaatgctcaatattcacttcaagaaaattgct…	>FBtr0331191 type=three_prime_UTR; loc=2L:complement(6632798..6634810);MD5=74941d7a86e304c6416e0bb66a4202e8; length=2013; parent=FBgn0051635; release=r6.38; species=Dmel;	1454	-1	-1	1614	FBgn0051635	2	1	0	0	1	CG31635
FBtr0079372	ctttaaaacctttcgtttttaacatctctgtatatagtacaaattaacaattacataatgtcgaaatgtacaaattcaatgctgaatggggccgagtctttacgtagtttgcaatgctgctatagtaccaatattcgatgtacatagcgtatgtcttagaggtacaataccttaaatatgctaacacaccttaccgattgatcgccactgccaatggggtcagttggatatggttaattgaaaacagttttt	>FBtr0079372 type=three_prime_UTR; loc=2L:complement(6906666..6906917);MD5=b79f848f162cf2145563b1fdc3fd6a17; length=252; parent=FBgn0042092; release=r6.38; species=Dmel;	-1	139	-1	29	FBgn0042092	2	0	1	0	1	Polr1F
FBtr0303251	gagtgtccttcattatatgtattactttcttcggtttagtcaggaatagaattttgaaagctttccatttcgcgtgatagaaaacacacacttacagagaaaacgttttaagtattaactaacaagtaaacacgagtatctctaatcttttagctagttgtaaatacgaaataaaaaccacataaacatgcctacgttatatcattcatatgcagctcatgtaagccttgtaaatagtcgcaataaaaatgaaagaaaacct	>FBtr0303251 type=three_prime_UTR; loc=2L:7352281..7352542;MD5=1594ce0b71530b71d2df25078843aa1d; length=262; parent=FBgn0031902; release=r6.38; species=Dmel;	c(159, 229)	-1	-1	-1	FBgn0031902	2	2	0	0	0	Wnt6
FBtr0334800	gagtgtccttcattatatgtattactttcttcggtttagtcaggaatagaattttgaaagctttccatttcgcgtgatagaaaacacacacttacagagaaaacgttttaagtattaactaacaagtaaacacgagtatctctaatcttttagctagttgtaaatacgaaataaaaaccacataaacatgcctacgttatatcattcatatgcagctcatgtaagccttgtaaatagtcgcaat	>FBtr0334800 type=three_prime_UTR; loc=2L:7352281..7352524;MD5=b38ca0964cfd7466ce763089dc3ff12a; length=244; parent=FBgn0031902; release=r6.38; species=Dmel;	c(159, 229)	-1	-1	-1	FBgn0031902	2	2	0	0	0	Wnt6
FBtr0079500	ggagtataccgccttcaatccctttgtcgatcggaccattgcctctgccacggatactgccattgatggggaagtcgaactttagacccctcaacacgttatgtaaatacattgtatatatagccatatatagacagggtactcgcacctagcacctgaacaggatcctttcatacctgtcccgaaaaaaaggagtcatcaaaattctcttccgacctaagcacccggccacgtttgtggttgcctatttctctcgcttacctatttatttagcatacattttccaagcatcctgtgaaaaaaccatcacaagttttcttcgaacggaatgccaagtgcattctggaaggaaatgcttgtacatctacataatgccaataaagaaaatgtaact	>FBtr0079500 type=three_prime_UTR; loc=2L:complement(7740562..7740955);MD5=ecb7adcea9f5b0110d6ee5980ea0c933; length=394; parent=FBgn0014454; release=r6.38; species=Dmel;	102	-1	-1	113	FBgn0014454	2	1	0	0	1	Acp1
FBtr0344788	actggaatctccatcagcacgaacaaactatatgttagtcaatgtctaagagtcgaaccgagtttaatatctatgcaagaacgtatttaagaggagcataaagacatacgtttagatatcggtgtatatgaatagtgtaggtaatttttgtacataaagtttagataacgcaaataactaaaatactatgtgtacataatatgcaacaaaggtgtgttaaacgacagattgtgtacgcacaaatcgtctatcaagaagaataacatacaggaaatggataaaatattcgattataagcataatataatggaattgggtctcgaatctgcaacaggatacagcaatgcattcacgtagtttaaaaacagaacaaattttcggactgatttagatgaattt…	>FBtr0344788 type=three_prime_UTR; loc=2L:8053049..8054326;MD5=a4ee61576bde9330f254846aad6dba0d; length=1278; parent=FBgn0031981; release=r6.38; species=Dmel;	-1	c(149, 191)	-1	-1	FBgn0031981	2	0	2	0	0	Megf8
FBtr0344789	actggaatctccatcagcacgaacaaactatatgttagtcaatgtctaagagtcgaaccgagtttaatatctatgcaagaacgtatttaagaggagcataaagacatacgtttagatatcggtgtatatgaatagtgtaggtaatttttgtacataaagtttagataacgcaaataactaaaatactatgtgtacataatatgcaacaaaggtgtgttaaacgacagattgtgtacgcacaaatcgtctatcaagaagaataacatacaggaaatggataaaatattcgattataagcataatataatggaattgggtctcgaatctgcaacaggatacagcaatgcattcacgtagtttaaaaacagaacaaattttcggactgatttagatgaattt…	>FBtr0344789 type=three_prime_UTR; loc=2L:8053049..8054326;MD5=a4ee61576bde9330f254846aad6dba0d; length=1278; parent=FBgn0031981; release=r6.38; species=Dmel;	-1	c(149, 191)	-1	-1	FBgn0031981	2	0	2	0	0	Megf8
FBtr0079551	gaatttatgcttactaagtgccatatgtttaagtttgcaaggtttttcttgcctagtctacagttaaagccaataaatggtaaatggtgttcaaatgctgaaatgaatcgaaattaaagattacacacatttgtatgtacatacatatgtatgtacatacatacgcttg	>FBtr0079551 type=three_prime_UTR; loc=2L:complement(7994838..7995006);MD5=f9e5933801247d3bb148ed4c7f36969d; length=169; parent=FBgn0031970; release=r6.38; species=Dmel;	-1	c(136, 152)	-1	-1	FBgn0031970	2	0	2	0	0	CG7227
FBtr0305574	gaatttatgcttactaagtgccatatgtttaagtttgcaaggtttttcttgcctagtctacagttaaagccaataaatggtaaatggtgttcaaatgctgaaatgaatcgaaattaaagattacacacatttgtatgtacatacatatgtatgtacatacatacgcttg	>FBtr0305574 type=three_prime_UTR; loc=2L:complement(7994838..7995006);MD5=f9e5933801247d3bb148ed4c7f36969d; length=169; parent=FBgn0031970; release=r6.38; species=Dmel;	-1	c(136, 152)	-1	-1	FBgn0031970	2	0	2	0	0	CG7227
FBtr0329932	ctcaacaccgctcgaatagcccccagcagcagcagcagcagtcgcagcagccgcactccagttctggctcctcgcccgtaatgtccaacagcagcagcagtccggctccgccctccagcagtcccagtccgcaggagagccccaagaactgcagctacatctaccgtgattgattgatatgcaacaccaaatcgatgccactcatccaggcccagtctacgcacgcccagccacacccacagtcgcacccgcacccgcttccgccacccggtccgaccacgcccccagcacagccacgcgccagaagtccaatgatcggcaggacatatgccaagtccatgcccgtgacaccagttcaaccgcaatcgccgctggctgagacgccctcctatgagctct…	>FBtr0329932 type=three_prime_UTR; loc=2L:8666039..8670014;MD5=6ea451ae91119f18b282df00c4875e7d; length=3976; parent=FBgn0011259; release=r6.38; species=Dmel;	1346	-1	-1	1966	FBgn0011259	2	1	0	0	1	Sema1a
FBtr0303879	gacgggagtggggcggctgaaaccagtcagggactaattacccaaaatatggctgtaaacaacacaaacacacgtaacagaagtcttggtcgcgcaagaagacagccgccccgtcatggcattgtaactcaacaccgctcgaatagcccccagcagcagcagcagcagtcgcagcagccgcactccagttctggctcctcgcccgtaatgtccaacagcagcagcagtccggctccgccctccagcagtcccagtccgcaggagagccccaagaactgcagctacatctaccgtgattgattgatatgcaacaccaaatcgatgccactcatccaggcccagtctacgcacgcccagccacacccacagtcgcacccgcacccgcttccgccacccggt…	>FBtr0303879 type=three_prime_UTR; loc=2L:join(8664170..8664220,8665446..8665518,8666036..8670014);MD5=c3226c0fe7eb31361dfbafd627bd11c5; length=4103; parent=FBgn0011259; release=r6.38; species=Dmel;	1473	-1	-1	2093	FBgn0011259	2	1	0	0	1	Sema1a
FBtr0079699	ggcgtctggatgagaccgggctgcgaatcctgtgaacgttgaggacgaacgtcaactttttccacctaaacttggcccatactttgatactttcctagatctttcatttgcattacgtttaattgtttgttattcattgtacataaatatttattacggaaatgtcctcatgcaattcatcaaaattttttttcccttcaagagttatacgaaaataatattcaacagatatcgaaattatatataccaaaggcgaataaaagcgttaaactgttgctccgaaagaaaaaatgttgaaaacaatttatgcaaattttcatcccagatttaactcagtgctaattgctcgttttaacccgaaaatatggaagaaaggtaaagagagaagggagaaattta…	>FBtr0079699 type=three_prime_UTR; loc=2L:complement(8491868..8492666);MD5=5e266fde9eb3851aa7cf96e9915d3172; length=799; parent=FBgn0032048; release=r6.38; species=Dmel;	643	138	-1	-1	FBgn0032048	2	1	1	0	0	Dh31
FBtr0079700	ggcgtctggatgagaccgggctgcgaatcctgtgaacgttgaggacgaacgtcaactttttccacctaaacttggcccatactttgatactttcctagatctttcatttgcattacgtttaattgtttgttattcattgtacataaatatttattacggaaatgtcctcatgcaattcatcaaaattttttttcccttcaagagttatacgaaaataatattcaacagatatcgaaattatatataccaaaggcgaataaaagcgttaaactgttgctccgaaagaaaaaatgttgaaaacaatttatgcaaattttcatcccagatttaactcagtgctaattgctcgttttaacccgaaaatatggaagaaaggtaaagagagaagggagaaattta…	>FBtr0079700 type=three_prime_UTR; loc=2L:complement(8491868..8492666);MD5=5e266fde9eb3851aa7cf96e9915d3172; length=799; parent=FBgn0032048; release=r6.38; species=Dmel;	643	138	-1	-1	FBgn0032048	2	1	1	0	0	Dh31
FBtr0079788	tagagacacacgggtagacacctaatgtacatatagcttttgtatatatcaatagataattgtgtaatccaacacgatgaatcgctacaagctatcctagcaatgccattaccacttccataaaacaactttatgtcctcggtccatttcttcacatcccgaaaaggtttcgtttgggctccactgcggagctcttcccttttgtacaaataccaaaactagttataatttagttatgttactgtagtatgtaattaagtctaggttgtacaattataaagtcatcactaatagggcgcatttactattgaattctggttttccgtcactaagttggccattacgtgtttatgagtcgcctaagtaaatcctatacatatgtagttgtatatttaatct…	>FBtr0079788 type=three_prime_UTR; loc=2L:complement(8943455..8943933);MD5=4e6537b9c6b28dc19ffee3ba710b6fdd; length=479; parent=FBgn0032078; release=r6.38; species=Dmel;	-1	26	-1	41	FBgn0032078	2	0	1	0	1	C1GalTA
FBtr0079789	tagagacacacgggtagacacctaatgtacatatagcttttgtatatatcaatagataattgtgtaatccaacacgatgaatcgctacaagctatcctagcaatgccattaccacttccataaaacaactttatgtcctcggtccatttcttcacatcccgaaaaggtttcgtttgggctccactgcggagctcttcccttttgtacaaataccaaaactagttataatttagttatgttactgtagtatgtaattaagtctaggttgtacaattataaagtcatcactaatagggcgcatttactattgaattctggttttccgtcactaagttggccattacgtgtttatgagtcgcctaagtaaatcctatacatatgtagttgtatatttaatct…	>FBtr0079789 type=three_prime_UTR; loc=2L:complement(8943455..8943933);MD5=4e6537b9c6b28dc19ffee3ba710b6fdd; length=479; parent=FBgn0032078; release=r6.38; species=Dmel;	-1	26	-1	41	FBgn0032078	2	0	1	0	1	C1GalTA
FBtr0079790	tagagacacacgggtagacacctaatgtacatatagcttttgtatatatcaatagataattgtgtaatccaacacgatgaatcgctacaagctatcctagcaatgccattaccacttccataaaacaactttatgtcctcggtccatttcttcacatcccgaaaaggtttcgtttgggctccactgcggagctcttcccttttgtacaaataccaaaactagttataatttagttatgttactgtagtatgtaattaagtctaggttgtacaattataaagtcatcactaatagggcgcatttactattgaattctggttttccgtcactaagttggccattacgtgtttatgagtcgcctaagtaaatcctatacatatgtagttgtatatttaatct…	>FBtr0079790 type=three_prime_UTR; loc=2L:complement(8943455..8943933);MD5=4e6537b9c6b28dc19ffee3ba710b6fdd; length=479; parent=FBgn0032078; release=r6.38; species=Dmel;	-1	26	-1	41	FBgn0032078	2	0	1	0	1	C1GalTA
FBtr0079800	aggcagtcttcgcttggcgcctataaccgcaaacgatgagtggacatgtcccggctgtgggcctgtttccacatcctgcccagcaacgatagcgatagcgatgactacgacgacgacgacgaggagttttaaaggatcgccgcaggatcgtattgtatcagcgctggaaaggagtcatcacgtttgtttgcgaattattttgggtgaccaagtcgcatctaattttcagattgatcaatttgaagcagctcctccggcagaggatagatatctgccagagtacaagtactaagccagcaacgaatttaagtgacacattcgttaaatagtttgttttttccaaaatgaatagatcgaaaagcagcgagaacagcaataagatttaagatgaaaacaacg…	>FBtr0079800 type=three_prime_UTR; loc=2L:9340763..9341925;MD5=5ed086470fb893b689dadcc3cffab5e9; length=1163; parent=FBgn0026439; release=r6.38; species=Dmel;	797	436	-1	-1	FBgn0026439	2	1	1	0	0	Eaat1
FBtr0079801	aggcagtcttcgcttggcgcctataaccgcaaacgatgagtggacatgtcccggctgtgggcctgtttccacatcctgcccagcaacgatagcgatagcgatgactacgacgacgacgacgaggagttttaaaggatcgccgcaggatcgtattgtatcagcgctggaaaggagtcatcacgtttgtttgcgaattattttgggtgaccaagtcgcatctaattttcagattgatcaatttgaagcagctcctccggcagaggatagatatctgccagagtacaagtactaagccagcaacgaatttaagtgacacattcgttaaatagtttgttttttccaaaatgaatagatcgaaaagcagcgagaacagcaataagatttaagatgaaaacaacg…	>FBtr0079801 type=three_prime_UTR; loc=2L:9340763..9341925;MD5=5ed086470fb893b689dadcc3cffab5e9; length=1163; parent=FBgn0026439; release=r6.38; species=Dmel;	797	436	-1	-1	FBgn0026439	2	1	1	0	0	Eaat1
FBtr0079802	aggcagtcttcgcttggcgcctataaccgcaaacgatgagtggacatgtcccggctgtgggcctgtttccacatcctgcccagcaacgatagcgatagcgatgactacgacgacgacgacgaggagttttaaaggatcgccgcaggatcgtattgtatcagcgctggaaaggagtcatcacgtttgtttgcgaattattttgggtgaccaagtcgcatctaattttcagattgatcaatttgaagcagctcctccggcagaggatagatatctgccagagtacaagtactaagccagcaacgaatttaagtgacacattcgttaaatagtttgttttttccaaaatgaatagatcgaaaagcagcgagaacagcaataagatttaagatgaaaacaacg…	>FBtr0079802 type=three_prime_UTR; loc=2L:9340763..9341925;MD5=5ed086470fb893b689dadcc3cffab5e9; length=1163; parent=FBgn0026439; release=r6.38; species=Dmel;	797	436	-1	-1	FBgn0026439	2	1	1	0	0	Eaat1
FBtr0303876	aggcagtcttcgcttggcgcctataaccgcaaacgatgagtggacatgtcccggctgtgggcctgtttccacatcctgcccagcaacgatagcgatagcgatgactacgacgacgacgacgaggagttttaaaggatcgccgcaggatcgtattgtatcagcgctggaaaggagtcatcacgtttgtttgcgaattattttgggtgaccaagtcgcatctaattttcagattgatcaatttgaagcagctcctccggcagaggatagatatctgccagagtacaagtactaagccagcaacgaatttaagtgacacattcgttaaatagtttgttttttccaaaatgaatagatcgaaaagcagcgagaacagcaataagatttaagatgaaaacaacg…	>FBtr0303876 type=three_prime_UTR; loc=2L:9340763..9341925;MD5=5ed086470fb893b689dadcc3cffab5e9; length=1163; parent=FBgn0026439; release=r6.38; species=Dmel;	797	436	-1	-1	FBgn0026439	2	1	1	0	0	Eaat1
FBtr0479804	gtggacatgtcccggctgtgggcctgtttccacatcctgcccagcaacgatagcgatagcgatgactacgacgacgacgacgaggagttttaaaggatcgccgcaggatcgtattgtatcagcgctggaaaggagtcatcacgtttgtttgcgaattattttgggtgaccaagtcgcatctaattttcagattgatcaatttgaagcagctcctccggcagaggatagatatctgccagagtacaagtactaagccagcaacgaatttaagtgacacattcgttaaatagtttgttttttccaaaatgaatagatcgaaaagcagcgagaacagcaataagatttaagatgaaaacaacgtaacatttatcgcctaaattagggatactttcaaggtgt…	>FBtr0479804 type=three_prime_UTR; loc=2L:9340802..9341925;MD5=010573116a9c654e592838a97ddb873f; length=1124; parent=FBgn0026439; release=r6.38; species=Dmel;	758	397	-1	-1	FBgn0026439	2	1	1	0	0	Eaat1
FBtr0479805	aggatcgccgcaggatcgtattgtatcagcgctggaaaggagtcatcacgtttgtttgcgaattattttgggtgaccaagtcgcatctaattttcagattgatcaatttgaagcagctcctccggcagaggatagatatctgccagagtacaagtactaagccagcaacgaatttaagtgacacattcgttaaatagtttgttttttccaaaatgaatagatcgaaaagcagcgagaacagcaataagatttaagatgaaaacaacgtaacatttatcgcctaaattagggatactttcaaggtgtacataatttttaaatataattatattaaattgagttcaaatttgcattacattctccctatgattagtattacaattgagcagtaaaattagt…	>FBtr0479805 type=three_prime_UTR; loc=2L:9340895..9341925;MD5=b12a5df2c378bc700dc628a9b3eb899e; length=1031; parent=FBgn0026439; release=r6.38; species=Dmel;	665	304	-1	-1	FBgn0026439	2	1	1	0	0	Eaat1
FBtr0079860	cgccggaggatgcacaggacgacgcggaacagggacggattcggattgggtgactcggggcagcgactggctttgagccacagtgcgtttggcagccaccgatagttcgggattcgccgttggacctgggaattttatggtcatattggatggcccacaaccagtgtcgtggtgagggctaataagtttttagcatttgcagtgatgagttgatataaagcagaacttatataagtatctaaagtaccataaatgtatatcatatgtttaacatgaggaaacacgctagagatgggaaaaagaaatcgaattacaagtctagactgcagccaaataatggataattaaattaactaaatagcgcagaactgcaatgcacaaatcgtagcaaaactaaat…	>FBtr0079860 type=three_prime_UTR; loc=2L:complement(9547720..9549578);MD5=ab9f2bcc649715e8c8d0bec942f84110; length=1859; parent=FBgn0032129; release=r6.38; species=Dmel;	-1	-1	-1	c(1076, 1692)	FBgn0032129	2	0	0	0	2	jp
FBtr0080118	atcgccgatgcctcatttgaaaaatcatccagcagacctacacatacatacatatatactatgcagataaagaaaaagaattaacaaaacctagatgattaagtttagcttggaacgcaaagaacaaagaattcttgagatctacctattcgaacactgtgttgattttctctatgtactttagttgttagtttgtatctttgcgctgattaatttgaagtctaacctaatttaagctacccaagaaaatgataaacatgatgaagatcgttagccgtaagcttatggtgtaatgccgccgaaaacataatacttcatcaattttgtgatgatatttttttaataaaacacaaacatgatatgatatgccccgaaaaagcaaaagcaaatgttcagcta…	>FBtr0080118 type=three_prime_UTR; loc=2L:complement(10744075..10745487);MD5=d65bb1d66041d3f1de6b6627b84cac23; length=1413; parent=FBgn0032297; release=r6.38; species=Dmel;	c(861, 910)	-1	-1	-1	FBgn0032297	2	2	0	0	0	CG17124
FBtr0340246	atcgccgatgcctcatttgaaaaatcatccagcagacctacacatacatacatatatactatgcagataaagaaaaagaattaacaaaacctagatgattaagtttagcttggaacgcaaagaacaaagaattcttgagatctacctattcgaacactgtgttgattttctctatgtactttagttgttagtttgtatctttgcgctgattaatttgaagtctaacctaatttaagctacccaagaaaatgataaacatgatgaagatcgttagccgtaagcttatggtgtaatgccgccgaaaacataatacttcatcaattttgtgatgatatttttttaataaaacacaaacatgatatgatatgccccgaaaaagcaaaagcaaatgttcagcta…	>FBtr0340246 type=three_prime_UTR; loc=2L:complement(10744075..10745487);MD5=d65bb1d66041d3f1de6b6627b84cac23; length=1413; parent=FBgn0032297; release=r6.38; species=Dmel;	c(861, 910)	-1	-1	-1	FBgn0032297	2	2	0	0	0	CG17124
FBtr0305255	tccctgattaactcgttaaagcctgacataattctaaaaaacaaaaagaagaagtaattccaaagagaattaatccatacgatggtcgaaaccaagcgtggtatgaaattggattacacaaaagcaccaaagcttttctaccaccctttatacaatatacacctaatcctaaataatatgtctaaaatcaaaagtttcattgaattgtatatacaccaacgagtaattatcgttaaattaatcgctatagtgaacgaacgcatttgcattttaagcctagacgacaatccaaggaaagcgatttaaaagacttgctaattttgttcgcttctttggagtcaaggtctgagtagatatgggcttctgtatcatagtagtcggtgtttggatattaaatta…	>FBtr0305255 type=three_prime_UTR; loc=2L:10981666..10982293;MD5=4269391539ba3f9d4043b09f33e93fec; length=628; parent=FBgn0041781; release=r6.38; species=Dmel;	496	-1	-1	206	FBgn0041781	2	1	0	0	1	SCAR
FBtr0305256	tccctgattaactcgttaaagcctgacataattctaaaaaacaaaaagaagaagtaattccaaagagaattaatccatacgatggtcgaaaccaagcgtggtatgaaattggattacacaaaagcaccaaagcttttctaccaccctttatacaatatacacctaatcctaaataatatgtctaaaatcaaaagtttcattgaattgtatatacaccaacgagtaattatcgttaaattaatcgctatagtgaacgaacgcatttgcattttaagcctagacgacaatccaaggaaagcgatttaaaagacttgctaattttgttcgcttctttggagtcaaggtctgagtagatatgggcttctgtatcatagtagtcggtgtttggatattaaatta…	>FBtr0305256 type=three_prime_UTR; loc=2L:10981666..10982395;MD5=f9bd61e681de354cdc3dfecaafdf4594; length=730; parent=FBgn0041781; release=r6.38; species=Dmel;	496	-1	-1	206	FBgn0041781	2	1	0	0	1	SCAR
FBtr0340223	tccctgattaactcgttaaagcctgacataattctaaaaaacaaaaagaagaagtaattccaaagagaattaatccatacgatggtcgaaaccaagcgtggtatgaaattggattacacaaaagcaccaaagcttttctaccaccctttatacaatatacacctaatcctaaataatatgtctaaaatcaaaagtttcattgaattgtatatacaccaacgagtaattatcgttaaattaatcgctatagtgaacgaacgcatttgcattttaagcctagacgacaatccaaggaaagcgatttaaaagacttgctaattttgttcgcttctttggagtcaaggtctgagtagatatgggcttctgtatcatagtagtcggtgtttggatattaaatta…	>FBtr0340223 type=three_prime_UTR; loc=2L:10981666..10982395;MD5=f9bd61e681de354cdc3dfecaafdf4594; length=730; parent=FBgn0041781; release=r6.38; species=Dmel;	496	-1	-1	206	FBgn0041781	2	1	0	0	1	SCAR
FBtr0329949	tccctgattaactcgttaaagcctgacataattctaaaaaacaaaaagaagaagtaattccaaagagaattaatccatacgatggtcgaaaccaagcgtggtatgaaattggattacacaaaagcaccaaagcttttctaccaccctttatacaatatacacctaatcctaaataatatgtctaaaatcaaaagtttcattgaattgtatatacaccaacgagtaattatcgttaaattaatcgctatagtgaacgaacgcatttgcattttaagcctagacgacaatccaaggaaagcgatttaaaagacttgctaattttgttcgcttctttggagtcaaggtctgagtagatatgggcttctgtatcatagtagtcggtgtttggatattaaatta…	>FBtr0329949 type=three_prime_UTR; loc=2L:10981666..10982395;MD5=f9bd61e681de354cdc3dfecaafdf4594; length=730; parent=FBgn0041781; release=r6.38; species=Dmel;	496	-1	-1	206	FBgn0041781	2	1	0	0	1	SCAR
FBtr0329950	ttccaaagagaattaatccatacgatggtcgaaaccaagcgtggtatgaaattggattacacaaaagcaccaaagcttttctaccaccctttatacaatatacacctaatcctaaataatatgtctaaaatcaaaagtttcattgaattgtatatacaccaacgagtaattatcgttaaattaatcgctatagtgaacgaacgcatttgcattttaagcctagacgacaatccaaggaaagcgatttaaaagacttgctaattttgttcgcttctttggagtcaaggtctgagtagatatgggcttctgtatcatagtagtcggtgtttggatattaaattataaataatcgatattatcactgaactcaatcctaccccaacttgcaatcgatacgat…	>FBtr0329950 type=three_prime_UTR; loc=2L:10981723..10982395;MD5=d573f8bda08907288d40630fc828825c; length=673; parent=FBgn0041781; release=r6.38; species=Dmel;	439	-1	-1	149	FBgn0041781	2	1	0	0	1	SCAR
FBtr0304951	actatacaaaacaaatatgtaggtcaggatatttttttttttaaatactacaagtatcttaagttattatcctattttatttataataaacctaatttgtgaaagcaagtgcatattgcactgcattctatacatacactaagtatttgcccacgttttaattattttgtacacaaaaatactgttctaaaaatcagttaaaatattcataaattctcgactacttttgttaaattttgagggctgttggagatttatacaatcgttcttttggcggtgccgcgctctttgccatagtaagtcttatctgttgaccacgcagagtcatcgtaaaataaaatctcgaatattagtagatagatgaaaaccagtaagcttgttataatatttgtactgtct…	>FBtr0304951 type=three_prime_UTR; loc=2L:10994085..10997276;MD5=8e0ca7c8d27b4833e435297daa0f7741; length=3192; parent=FBgn0026147; release=r6.38; species=Dmel;	2768	-1	-1	1872	FBgn0026147	2	1	0	0	1	TTLL4A
FBtr0080187	atcacacttcatatagagcagactagctggcatgaagccctattcgattttgtacctgatttccgagcttttcggatgttagtgtcctttttcggactgcggatgcaactctcttggccctgtttaaaaatttgtgtatatatttctctagatcgcgattccctttcgttacaaagttaggacttgaattactcccattcttaggctgaagtcttcgcttatttaggaccaactgttcttcgtagggtttaaagtttttagatggaaaataattcaacgaaaaatgatatagaatgcatcacaggaaacattgaaaacaatgttgaagatttgctctggagtagccttggattttagaaggcgtacattattatcgatgatgccatactctggaaatga…	>FBtr0080187 type=three_prime_UTR; loc=2L:complement(10837732..10839315);MD5=e38cb749f388143631e188a9d73d4790; length=1584; parent=FBgn0032305; release=r6.38; species=Dmel;	-1	-1	-1	c(135, 1021)	FBgn0032305	2	0	0	0	2	CG6700
FBtr0301710	atcacacttcatatagagcagactagctggcatgaagccctattcgattttgtacctgatttccgagcttttcggatgttagtgtcctttttcggactgcggatgcaactctcttggccctgtttaaaaatttgtgtatatatttctctagatcgcgattccctttcgttacaaagttaggacttgaattactcccattcttaggctgaagtcttcgcttatttaggaccaactgttcttcgtagggtttaaagtttttagatggaaaataattcaacgaaaaatgatatagaatgcatcacaggaaacattgaaaacaatgttgaagatttgctctggagtagccttggattttagaaggcgtacattattatcgatgatgccatactctggaaatga…	>FBtr0301710 type=three_prime_UTR; loc=2L:complement(10837860..10839315);MD5=402a202f5443d4d33478c51031ef78e5; length=1456; parent=FBgn0032305; release=r6.38; species=Dmel;	-1	-1	-1	c(135, 1021)	FBgn0032305	2	0	0	0	2	CG6700
FBtr0080305	gaataaaacggaaggttaccccattcataacttctcagagaaagagatttgtgaggcaaaggtcaatagtaaatatttagaataactatgttgaaaagagactgtatcagcaagtttagaacatttgctatatttacaaaatgagacgtgggatctctcgttctgagttctagtacaacaaaattgtatctagaatattcacggaaacccagtttctttttaaagccattaaaaaagaaccatcgagaaatctaaagattgatttgctaccaacgaattgtaaataaagtggtatattgtggcaggttcttgaaacaacattgttgaggccgttctatcttatctaagatggtgactacgatctattgcgtcgtttgaagacgaactttcagaacgaat…	>FBtr0080305 type=three_prime_UTR; loc=2L:complement(12046857..12047395);MD5=f5e9cc7c3fecb5804468a85ba5dcfad3; length=539; parent=FBgn0032401; release=r6.38; species=Dmel;	279	-1	-1	457	FBgn0032401	2	1	0	0	1	Plzf
FBtr0342594	gaataaaacggaaggttaccccattcataacttctcagagaaagagatttgtgaggcaaaggtcaatagtaaatatttagaataactatgttgaaaagagactgtatcagcaagtttagaacatttgctatatttacaaaatgagacgtgggatctctcgttctgagttctagtacaacaaaattgtatctagaatattcacggaaacccagtttctttttaaagccattaaaaaagaaccatcgagaaatctaaagattgatttgctaccaacgaattgtaaataaagtggtatattgtggcaggttcttgaaacaacattgttgaggccgttctatcttatctaagatggtgactacgatctattgcgtcgtttgaagacgaactttcagaacgaat…	>FBtr0342594 type=three_prime_UTR; loc=2L:complement(12046711..12047395);MD5=126ba7fdc3eb0b6b4ceb358598390c24; length=685; parent=FBgn0032401; release=r6.38; species=Dmel;	279	-1	-1	457	FBgn0032401	2	1	0	0	1	Plzf
FBtr0329925	attaaacaactcaggggaaccttgactttagaactattttaagattaattgtgaagaatccgcaaaacagtgacgataagattaccgaaagcaaatctgcttaatttgtttaaacaaattaccatgttattagctctccaaaatctgttcactcgatcagccttcaaatcggagttatgtatgtagttatgtaagttatgtaaagtagaaccgattagagggtcgactttggtgtttagacagttctgaaattcatatttagtgcctgcagattagactacaaagataagatggctatagcagaactatcggtgataacttgaatgctctatttttaacctctaaattcaaagagtatcattctctcgattgtgaatatcaagagcaaacgttgagctt…	>FBtr0329925 type=three_prime_UTR; loc=2L:complement(12700949..12701889);MD5=e42bf0138ce8965964b81489cfb571e0; length=941; parent=FBgn0032450; release=r6.38; species=Dmel;	807	-1	618	-1	FBgn0032450	2	1	0	1	0	CG5776
FBtr0080700	gtgcaggattattgcatcgcacacatatgtatcctaagttatttatagtttttatcgaagaccttagtttgtagattgacaatttttctcatactaattttcaacccctcgtgacgtaaaccaaaatgtgtccccttctctctaaagtgaatcatactttacacatgtatctagtgctagttcggaaccaatagaattgtaaatgacacataaaactctgtacataactcgaaaagctcactgacatacatacatacatttgtatgtgcatgaatatacctttacacaaaacatgtaattctagttaaatatacaattgatgtaagtttatagacgatttttagatgcggttgaaatatttatgattttctttgctatgaatttccaaagatctaaatg…	>FBtr0080700 type=three_prime_UTR; loc=2L:15042619..15043334;MD5=cdbd6c529ddb6c8add4db4ba92232a56; length=716; parent=FBgn0004837; release=r6.38; species=Dmel;	-1	c(219, 537)	-1	-1	FBgn0004837	2	0	2	0	0	Su(H)
FBtr0080702	gctaataaatatcaagattgatggccaccctttcgcacactttgtaaatagttttctatgcacccgcccccattaagtcgagattttatcaaagttactgatgatatatgagcaaatttgctgaatgtgtgtcttgtccagagttggaagaaactaattaactatatatagtggttaccatatagaaaattaagttactcaaacaataggtcgacaagattcgaactttatttggtccaaagctaaacaatacagaatttgaatgaaatttgcctgtaggttaataatattaagttaccggcaaatttcatttagattttctaacgtttagtcttggtctgtttttttttttggtttcgttttccagtgaaaaccgagcaatttttccaaaaccatttc…	>FBtr0080702 type=three_prime_UTR; loc=2L:15095730..15096915;MD5=40176fd3a654f0f22b06970fa01b7e12; length=1186; parent=FBgn0028879; release=r6.38; species=Dmel;	c(43, 1052)	-1	-1	-1	FBgn0028879	2	2	0	0	0	CG15270
FBtr0080703	gctaataaatatcaagattgatggccaccctttcgcacactttgtaaatagttttctatgcacccgcccccattaagtcgagattttatcaaagttactgatgatatatgagcaaatttgctgaatgtgtgtcttgtccagagttggaagaaactaattaactatatatagtggttaccatatagaaaattaagttactcaaacaataggtcgacaagattcgaactttatttggtccaaagctaaacaatacagaatttgaatgaaatttgcctgtaggttaataatattaagttaccggcaaatttcatttagattttctaacgtttagtcttggtctgtttttttttttggtttcgttttccagtgaaaaccgagcaatttttccaaaaccatttc…	>FBtr0080703 type=three_prime_UTR; loc=2L:15095730..15096915;MD5=40176fd3a654f0f22b06970fa01b7e12; length=1186; parent=FBgn0028879; release=r6.38; species=Dmel;	c(43, 1052)	-1	-1	-1	FBgn0028879	2	2	0	0	0	CG15270
FBtr0307486	gctaataaatatcaagattgatggccaccctttcgcacactttgtaaatagttttctatgcacccgcccccattaagtcgagattttatcaaagttactgatgatatatgagcaaatttgctgaatgtgtgtcttgtccagagttggaagaaactaattaactatatatagtggttaccatatagaaaattaagttactcaaacaataggtcgacaagattcgaactttatttggtccaaagctaaacaatacagaatttgaatgaaatttgcctgtaggttaataatattaagttaccggcaaatttcatttagattttctaacgtttagtcttggtctgtttttttttttggtttcgttttccagtgaaaaccgagcaatttttccaaaaccatttc…	>FBtr0307486 type=three_prime_UTR; loc=2L:15095730..15096915;MD5=40176fd3a654f0f22b06970fa01b7e12; length=1186; parent=FBgn0028879; release=r6.38; species=Dmel;	c(43, 1052)	-1	-1	-1	FBgn0028879	2	2	0	0	0	CG15270
FBtr0332180	gctaataaatatcaagattgatggccaccctttcgcacactttgtaaatagttttctatgcacccgcccccattaagtcgagattttatcaaagttactgatgatatatgagcaaatttgctgaatgtgtgtcttgtccagagttggaagaaactaattaactatatatagtggttaccatatagaaaattaagttactcaaacaataggtcgacaagattcgaactttatttggtccaaagctaaacaatacagaatttgaatgaaatttgcctgtaggttaataatattaagttaccggcaaatttcatttagattttctaacgtttagtcttggtctgtttttttttttggtttcgttttccagtgaaaaccgagcaatttttccaaaaccatttc…	>FBtr0332180 type=three_prime_UTR; loc=2L:15095730..15096915;MD5=40176fd3a654f0f22b06970fa01b7e12; length=1186; parent=FBgn0028879; release=r6.38; species=Dmel;	c(43, 1052)	-1	-1	-1	FBgn0028879	2	2	0	0	0	CG15270
FBtr0344791	gctaataaatatcaagattgatggccaccctttcgcacactttgtaaatagttttctatgcacccgcccccattaagtcgagattttatcaaagttactgatgatatatgagcaaatttgctgaatgtgtgtcttgtccagagttggaagaaactaattaactatatatagtggttaccatatagaaaattaagttactcaaacaataggtcgacaagattcgaactttatttggtccaaagctaaacaatacagaatttgaatgaaatttgcctgtaggttaataatattaagttaccggcaaatttcatttagattttctaacgtttagtcttggtctgtttttttttttggtttcgttttccagtgaaaaccgagcaatttttccaaaaccatttc…	>FBtr0344791 type=three_prime_UTR; loc=2L:15095730..15096915;MD5=40176fd3a654f0f22b06970fa01b7e12; length=1186; parent=FBgn0028879; release=r6.38; species=Dmel;	c(43, 1052)	-1	-1	-1	FBgn0028879	2	2	0	0	0	CG15270
FBtr0344792	gctaataaatatcaagattgatggccaccctttcgcacactttgtaaatagttttctatgcacccgcccccattaagtcgagattttatcaaagttactgatgatatatgagcaaatttgctgaatgtgtgtcttgtccagagttggaagaaactaattaactatatatagtggttaccatatagaaaattaagttactcaaacaataggtcgacaagattcgaactttatttggtccaaagctaaacaatacagaatttgaatgaaatttgcctgtaggttaataatattaagttaccggcaaatttcatttagattttctaacgtttagtcttggtctgtttttttttttggtttcgttttccagtgaaaaccgagcaatttttccaaaaccatttc…	>FBtr0344792 type=three_prime_UTR; loc=2L:15095730..15096915;MD5=40176fd3a654f0f22b06970fa01b7e12; length=1186; parent=FBgn0028879; release=r6.38; species=Dmel;	c(43, 1052)	-1	-1	-1	FBgn0028879	2	2	0	0	0	CG15270
FBtr0343105	tgttggctttagttgccggcgaagtaggttactcagagatcggatcggattccgaactgactccgatgctgtggctgaaatgctgaagatactcaactgatcattgcctgtatgatatgtacatatataaatatatataaaatgaagaacttaaactaatcggtaggtacgaatttttgggatatagctaattgtgagagccagcccccgcaacaataaagatacaattaaatgaaagacaagcaaatcggtttatgtccactcgtaaataataagttttatatgcatacaaacaaagtatatttataagtagtggaacaagtcatgtgctgggcactttattttatatcttacaatttctttcgatttctaactatgactttttttaaaaagaattgt…	>FBtr0343105 type=three_prime_UTR; loc=2L:complement(15161882..15163581);MD5=3e48f2fbf20af65da243d94bdccc27e9; length=1700; parent=FBgn0028888; release=r6.38; species=Dmel;	-1	c(118, 1499)	-1	-1	FBgn0028888	2	0	2	0	0	CG4168
FBtr0080765	gtaacagctctctaagcgcaggatgcgcttagggagtcagccgaatcgtccaattacagagccaatcaacaatccaggaggaagtatgccagtttctcctggaatttttctttaaagtaagttagttattttcgaaaaaagtagtttatgttttgtatttatgataggtttgtaaacagatctttgagatctcagttttgagttgtagtttaggcaaacctgtatttctaatgccttactttaagttaaattgttcgtaagtttgataacccaacgaatacaaatccatatcaatgacattccatagccttatcatcggcctttacgtgtatatatagaatttaaatgtataataagaattatttaaatctaggaaattgcctgccttaactgaaggaa…	>FBtr0080765 type=three_prime_UTR; loc=2L:complement(join(15756002..15756937,15757004..15757095));MD5=244754c1f3974e5781e807acb1474b14; length=1028; parent=FBgn0001987; release=r6.38; species=Dmel;	-1	-1	-1	c(328, 913)	FBgn0001987	2	0	0	0	2	Gli
FBtr0080767	gtaacagctctctaagcgcaggatgcgcttagggagtcagccgaatcgtccaattacagagccaatcaacaatccaggaggaagtatgccagtttctcctggaatttttctttaaagtaagttagttattttcgaaaaaagtagtttatgttttgtatttatgataggtttgtaaacagatctttgagatctcagttttgagttgtagtttaggcaaacctgtatttctaatgccttactttaagttaaattgttcgtaagtttgataacccaacgaatacaaatccatatcaatgacattccatagccttatcatcggcctttacgtgtatatatagaatttaaatgtataataagaattatttaaatctaggaaattgcctgccttaactgaaggaa…	>FBtr0080767 type=three_prime_UTR; loc=2L:complement(join(15756002..15756937,15757004..15757095));MD5=244754c1f3974e5781e807acb1474b14; length=1028; parent=FBgn0001987; release=r6.38; species=Dmel;	-1	-1	-1	c(328, 913)	FBgn0001987	2	0	0	0	2	Gli
FBtr0080768	gtaacagctctctaagcgcaggatgcgcttagggagtcagccgaatcgtccaattacagagccaatcaacaatccaggaggaagtatgccagtttctcctggaatttttctttaaagtaagttagttattttcgaaaaaagtagtttatgttttgtatttatgataggtttgtaaacagatctttgagatctcagttttgagttgtagtttaggcaaacctgtatttctaatgccttactttaagttaaattgttcgtaagtttgataacccaacgaatacaaatccatatcaatgacattccatagccttatcatcggcctttacgtgtatatatagaatttaaatgtataataagaattatttaaatctaggaaattgcctgccttaactgaaggaa…	>FBtr0080768 type=three_prime_UTR; loc=2L:complement(join(15756002..15756937,15757004..15757095));MD5=244754c1f3974e5781e807acb1474b14; length=1028; parent=FBgn0001987; release=r6.38; species=Dmel;	-1	-1	-1	c(328, 913)	FBgn0001987	2	0	0	0	2	Gli
FBtr0080769	gtaacagctctctaagcgcaggatgcgcttagggagtcagccgaatcgtccaattacagagccaatcaacaatccaggaggaagtatgccagtttctcctggaatttttctttaaagtaagttagttattttcgaaaaaagtagtttatgttttgtatttatgataggtttgtaaacagatctttgagatctcagttttgagttgtagtttaggcaaacctgtatttctaatgccttactttaagttaaattgttcgtaagtttgataacccaacgaatacaaatccatatcaatgacattccatagccttatcatcggcctttacgtgtatatatagaatttaaatgtataataagaattatttaaatctaggaaattgcctgccttaactgaaggaa…	>FBtr0080769 type=three_prime_UTR; loc=2L:complement(join(15756002..15756937,15757004..15757095));MD5=244754c1f3974e5781e807acb1474b14; length=1028; parent=FBgn0001987; release=r6.38; species=Dmel;	-1	-1	-1	c(328, 913)	FBgn0001987	2	0	0	0	2	Gli
FBtr0343721	gtaacagctctctaagcgcaggatgcgcttagggagtcagccgaatcgtccaattacagagccaatcaacaatccaggaggaagtatgccagtttctcctggaatttttctttaaagtaagttagttattttcgaaaaaagtagtttatgttttgtatttatgataggtttgtaaacagatctttgagatctcagttttgagttgtagtttaggcaaacctgtatttctaatgccttactttaagttaaattgttcgtaagtttgataacccaacgaatacaaatccatatcaatgacattccatagccttatcatcggcctttacgtgtatatatagaatttaaatgtataataagaattatttaaatctaggaaattgcctgccttaactgaaggaa…	>FBtr0343721 type=three_prime_UTR; loc=2L:complement(join(15756002..15756937,15757004..15757095));MD5=244754c1f3974e5781e807acb1474b14; length=1028; parent=FBgn0001987; release=r6.38; species=Dmel;	-1	-1	-1	c(328, 913)	FBgn0001987	2	0	0	0	2	Gli
FBtr0080808	taggatggccaatggcaggagagatggactttaggcgggacttgagacggatgagaaaccgtgctcaggctcggcaataacggtacccacatttagcgaatcgattagcaaatcaagagtgaagggtcctcagcataccgaatatacctactcacatacacctacatctatgttaagtacgtaactgtaaagacaaatgcatttccaaagacccgtactcctctattcctaagtaaagtgtaaataggcatcgagcacttcctcgcatactcaacaggaatatatatatatactacatacatatatatgtatatgtatatatacataaaaatatatctactctctaagcaggattctaaatgtttgctttcgttgggttttcgacgattcattgttaag…	>FBtr0080808 type=three_prime_UTR; loc=2L:complement(15905134..15905676);MD5=d7f28d25cb02959526eab489ef1a9de9; length=543; parent=FBgn0028645; release=r6.38; species=Dmel;	239	-1	-1	314	FBgn0028645	2	1	0	0	1	beat-Ib
FBtr0300615	taggatggccaatggcaggagagatggactttaggcgggacttgagacggatgagaaaccgtgctcaggctcggcaataacggtacccacatttagcgaatcgattagcaaatcaagagtgaagggtcctcagcataccgaatatacctactcacatacacctacatctatgttaagtacgtaactgtaaagacaaatgcatttccaaagacccgtactcctctattcctaagtaaagtgtaaataggcatcgagcacttcctcgcatactcaacaggaatatatatatatactacatacatatatatgtatatgtatatatacataaaaatatatctactctctaagcaggattctaaatgtttgctttcgttgggttttcgacgattcattgttaag…	>FBtr0300615 type=three_prime_UTR; loc=2L:complement(15905134..15905676);MD5=d7f28d25cb02959526eab489ef1a9de9; length=543; parent=FBgn0028645; release=r6.38; species=Dmel;	239	-1	-1	314	FBgn0028645	2	1	0	0	1	beat-Ib
FBtr0273450	catttcaagcatggcgacatgaaactaaagtgtgtcgccaaaatctcctccgtgtactggcagagcaacgaggaaagcgtggagagcgacaagcaccagaggattccggtgctggagtcgcgggagacggtcatgtccaagtcccgtcagtccatggacaaggctcagctcgaagacaaacaactgaagaagagccgacgccctgcagcagcaacttcagcggccgcagctgcagcagcagcagcagcctcgtccagcgcaagcagagcaactgtggcgccatttggggcgatgtggggctcatcggtgccctggtcacgcatattagcttccaaatcaattgcacgcatttccctctacgcgctgccagtcttaatagcatttctgtgtagcttccga…	>FBtr0273450 type=three_prime_UTR; loc=2L:join(16990474..16990503,16991981..16992125,16992657..16993984);MD5=4cded693a05d0a97fd74ef5af5c51a25; length=1503; parent=FBgn0053179; release=r6.38; species=Dmel;	-1	694	-1	627	FBgn0053179	2	0	1	0	1	beat-IIIb
FBtr0329973	caattaacctggaagcaaatgaacagtagagccagctactcggcctagaaccccattatgttctgtgtatatatatttcaatttttgtcacatcaagtatacgccgcgtgtgcggctcgcttaactagtgtatgtacatatccgtaaattaactgtatttatatataacacatttattagtgaagcattgaaatgtcgttgttcctctttggccttttttgcttgtcgtctaagggaaaatgctcaaagttgttggctaagaaattgctttaaaagtaaaaggcggtcaaatattttcaatggtacgcaaaactgtataaatgaactcaagtaagtagccaaagccatagaatttaagaagctaacgtaagactcataagatatttaaattttatgata…	>FBtr0329973 type=three_prime_UTR; loc=2L:16993043..16993984;MD5=85c69bd4cdcb273f9a619a3e6ccd65f8; length=942; parent=FBgn0053179; release=r6.38; species=Dmel;	-1	133	-1	66	FBgn0053179	2	0	1	0	1	beat-IIIb
FBtr0081008	acaacaaactttgctaaatactagtgtacatatatttcataaaatatatcggaaattaaccaattagagctacatgtaaaaaggtctcaatccaaaatgaacttcaacacaaaacctgtcttatataattctattttaccgcaatgtacataaatttaatgagggaaatgcgaatctcattgcccgatgccttgttacgacttttcgttattgacaaaagtgaattgaaaatgattattgtttaaataaaatataactttagaattt	>FBtr0081008 type=three_prime_UTR; loc=2L:complement(17413248..17413514);MD5=8d90626186c95b6a1d8dab0cd46871ba; length=267; parent=FBgn0011274; release=r6.38; species=Dmel;	-1	c(25, 145)	-1	-1	FBgn0011274	2	0	2	0	0	Dif
FBtr0081009	acaacaaactttgctaaatactagtgtacatatatttcataaaatatatcggaaattaaccaattagagctacatgtaaaaaggtctcaatccaaaatgaacttcaacacaaaacctgtcttatataattctattttaccgcaatgtacataaatttaatgagggaaatgcgaatctcattgcccgatgccttgttacgacttttcgttattgacaaaagtgaattgaaaatgattattgtttaaataaaatataactttagaattt	>FBtr0081009 type=three_prime_UTR; loc=2L:complement(17413248..17413514);MD5=8d90626186c95b6a1d8dab0cd46871ba; length=267; parent=FBgn0011274; release=r6.38; species=Dmel;	-1	c(25, 145)	-1	-1	FBgn0011274	2	0	2	0	0	Dif
FBtr0301578	acaacaaactttgctaaatactagtgtacatatatttcataaaatatatcggaaattaaccaattagagctacatgtaaaaaggtctcaatccaaaatgaacttcaacacaaaacctgtcttatataattctattttaccgcaatgtacataaatttaatgagggaaatgcgaatctcattgcccgatgccttgttacgacttttcgttattgacaaaagtgaattgaaaatgattattgtttaaataaaatataactttagaattt	>FBtr0301578 type=three_prime_UTR; loc=2L:complement(17413248..17413514);MD5=8d90626186c95b6a1d8dab0cd46871ba; length=267; parent=FBgn0011274; release=r6.38; species=Dmel;	-1	c(25, 145)	-1	-1	FBgn0011274	2	0	2	0	0	Dif
FBtr0081040	cgggaggagcagcaggtgggcttcacctactacgaggacgtggagagcggcagcgaggtggacgaggacgacgacgagggggtcaacatacgggtctcctacgttcagcacgccgaggtggtggcccagctgcagcaggtcaccacggcgtcgggcccatcggctccgtcctcatccagatcgtccaatcttcaggagcacctcagcaggctgcccaaccgcatggcagccgcctttggtcggatgtcggccaatctgaattgctaccagaagactgtcgccacgccggagcgtcactccaactcctcctgaggatcaggacgtggacggaggggcaaacagaacccagaaaccaaaactcaaactgagacaatcccagtgcagcgtgtgccgccacca…	>FBtr0081040 type=three_prime_UTR; loc=2L:complement(18138675..18139844);MD5=394687ae96c504c76955d4f8f9c42d0e; length=1170; parent=FBgn0041184; release=r6.38; species=Dmel;	c(757, 939)	-1	-1	-1	FBgn0041184	2	2	0	0	0	Socs36E
FBtr0329927	cgggaggagcagcaggtgggcttcacctactacgaggacgtggagagcggcagcgaggtggacgaggacgacgacgagggggtcaacatacgggtctcctacgttcagcacgccgaggtggtggcccagctgcagcaggtcaccacggcgtcgggcccatcggctccgtcctcatccagatcgtccaatcttcaggagcacctcagcaggctgcccaaccgcatggcagccgcctttggtcggatgtcggccaatctgaattgctaccagaagactgtcgccacgccggagcgtcactccaactcctcctgaggatcaggacgtggacggaggggcaaacagaacccagaaaccaaaactcaaactgagacaatcccagtgcagcgtgtgccgccacca…	>FBtr0329927 type=three_prime_UTR; loc=2L:complement(18138675..18139844);MD5=394687ae96c504c76955d4f8f9c42d0e; length=1170; parent=FBgn0041184; release=r6.38; species=Dmel;	c(757, 939)	-1	-1	-1	FBgn0041184	2	2	0	0	0	Socs36E
FBtr0329928	ggatcaggacgtggacggaggggcaaacagaacccagaaaccaaaactcaaactgagacaatcccagtgcagcgtgtgccgccaccataagttaaaagatcaaacgcgaagccacataacaaaatcgctagctcgctactacaagactgtcatggatcaaaaaccaaatgttcaccatatatatctcacctattggaatgcagctcggacggatttttgagttgtggcactcttgaaagcgagctggtagaatgtagaatcgaaatcgcagttagctaattgtactataaactaagtattattatctaaagcaaccctctctcctacacacataagtattgcaaaaagaagggccaatcgagcttttcgtaatcgctggtattcttgtaatatttcatt…	>FBtr0329928 type=three_prime_UTR; loc=2L:complement(18138675..18139532);MD5=897ddc55a811212b48741e8c15c09d7b; length=858; parent=FBgn0041184; release=r6.38; species=Dmel;	c(445, 627)	-1	-1	-1	FBgn0041184	2	2	0	0	0	Socs36E
FBtr0343824	gctggagggcactccaccctgcaaagtggaggacggagtgaatcatcaactttgggtgcggagtaagcagaagctacaaattttgagacgcattttgtaaataaatcttgcgtttgtacataagtttcattgttaattgcttacctaaagacttgtttgtcaatgcatgttgtacacgacataagatacaaaacactcggacgcatcatcaaacacttgctactcgaagtgttctagttatatcctaattaaaattacaatataactattaacaaattataataaacgctttatgtgagtgaaataat	>FBtr0343824 type=three_prime_UTR; loc=2L:18531660..18531967;MD5=db3c52ff588140c3d178402e756e9c73; length=308; parent=FBgn0032685; release=r6.38; species=Dmel;	96	115	-1	-1	FBgn0032685	2	1	1	0	0	CG10211
FBtr0343112	ctacgtaaaatcaatttcagcaaacaaatttcctatagcagaggagccggatggaggcgaagaggtttctaaactatgtatgtctaacacctagctgaggagcagatccctaaaactatgtctaatatctagctgtaaatatatatatatacatgtatccctaaacccccctatatgttctacaaatacgtgtaaatcgaattgtacaaatcgagaattggcagatattttaatataaataaatatgaacgtatgtgcataactattattagattcgtcctaagcattggtatttcttttgtacatatacgagcgtgacatgacgaaaagtgtatgaaaagtaatgacaaacaaaacaacgcgcccactgtttaaat	>FBtr0343112 type=three_prime_UTR; loc=2L:complement(18714453..18714829);MD5=c8657a67c8d1bb13c5a1398f3f650cf8; length=377; parent=FBgn0032707; release=r6.38; species=Dmel;	134	300	-1	-1	FBgn0032707	2	1	1	0	0	CG10348
FBtr0340322	aggacttaggttcgcccttagtctagcgagtaattatctggcgtaggttaatcgaatgtggaactaatcccgggagaagaggatacgcttcgtacaagcatttttcaagcatcacatactctaattatattcatacttatcgccccatacatataaaaactcgatttgctggcaaaaacatcttgggaattgaatgttatctttgactaatgtttgttttggatctttgaagtacccatcacaacttatcaagtaacaaaatataacgttcaatttctaatatatatttttttaaaaccaaccaaactgagccactctagccagggacatatgcatacatacgtacattaataacgatcataccaaaagcgtatttatagttaacctttagttaagttt…	>FBtr0340322 type=three_prime_UTR; loc=2L:complement(18977519..18978354);MD5=facc2589b41b7aa6b148318462710135; length=836; parent=FBgn0032731; release=r6.38; species=Dmel;	-1	-1	-1	c(614, 820)	FBgn0032731	2	0	0	0	2	Swip-1
FBtr0081189	aattctaccttaactgtttgcaatgccagaatacgtttagttttccgattgtcgcttttgttcgctctcaatctcaatccagaaagtgaaagtgatttgaacgtagacgtagacgtagtctaaaaacttcctagtaacgctatgctcaactcagcaaagtgccgccaaggcgatctcctcgatatcctccatccaaggagccgcttccagaccacatcggcagccgccgtaagattcgatcagctccagcaataaattaaccgtatactagccgatcgctgctcgatcgaaaaatttagcgtgccatatagatggggaatgacccgcgaatactacttaagtgcaatcaatcaatttgtaaataccccatgcacctactaaccaaccaaaaatatctcg…	>FBtr0081189 type=three_prime_UTR; loc=2L:complement(18961116..18962873);MD5=068e0be9c12f732fb76eb1e3d124899e; length=1758; parent=FBgn0015772; release=r6.38; species=Dmel;	c(357, 1426)	-1	-1	-1	FBgn0015772	2	2	0	0	0	Nak
FBtr0340326	aaacttcctagtaacgctatgctcaactcagcaaagtgccgccaaggcgatctcctcgatatcctccatccaaggagccgcttccagaccacatcggcagccgccgtaagattcgatcagctccagcaataaattaaccgtatactagccgatcgctgctcgatcgaaaaatttagcgtgccatatagatggggaatgacccgcgaatactacttaagtgcaatcaatcaatttgtaaataccccatgcacctactaaccaaccaaaaatatctcgacgaaccttcttatcttttgtcatatgagtttattcggtgattaatatgttttcttcaaagtgagctgtaaatccttaaacctatttggtgaaaaataccaccaatcttatgttttccaaaaa…	>FBtr0340326 type=three_prime_UTR; loc=2L:complement(18960927..18962750);MD5=d0d1447ec7ff46ffba34556436cf8afd; length=1824; parent=FBgn0015772; release=r6.38; species=Dmel;	c(234, 1303)	-1	-1	-1	FBgn0015772	2	2	0	0	0	Nak
FBtr0081318	gctaaggcaactttagcaactaattacatcgaaaaaatgagaccgctacctacatataatcacagttctggagcagcgtgtatatatgccaatgaacgcatatatattttatttagtttttaatcattcacctaagcgatttgaaattctcaagtgttattgacatatacggcgcaagcggatccaaagacatactgatttataacgccgtgtttattgcaaacacatttataatgatataacgatgataatcataatgacgacgctttgcgccttaaatcatatgcaaaattcaattttgttttgaagcagcatgaagagagtttaactaaaagaccatccttaccatacccctcgatcctgaacaatgcatattgttattgcattttgggagtttct…	>FBtr0081318 type=three_prime_UTR; loc=2L:complement(19775104..19776941);MD5=e7e89d2110cc2ac8acd6efa7e500bb47; length=1838; parent=FBgn0032821; release=r6.38; species=Dmel;	-1	-1	-1	c(79, 720)	FBgn0032821	2	0	0	0	2	CdGAPr
FBtr0332179	gctaaggcaactttagcaactaattacatcgaaaaaatgagaccgctacctacatataatcacagttctggagcagcgtgtatatatgccaatgaacgcatatatattttatttagtttttaatcattcacctaagcgatttgaaattctcaagtgttattgacatatacggcgcaagcggatccaaagacatactgatttataacgccgtgtttattgcaaacacatttataatgatataacgatgataatcataatgacgacgctttgcgccttaaatcatatgcaaaattcaattttgttttgaagcagcatgaagagagtttaactaaaagaccatccttaccatacccctcgatcctgaacaatgcatattgttattgcattttgggagtttct…	>FBtr0332179 type=three_prime_UTR; loc=2L:complement(19774874..19776941);MD5=10c0d05d9740e9cb64f16f78bb619544; length=2068; parent=FBgn0032821; release=r6.38; species=Dmel;	-1	-1	-1	c(79, 720)	FBgn0032821	2	0	0	0	2	CdGAPr
FBtr0081327	atttttcgaagccgccatgtgaaggatcagcaggagatcagcaggcatcaattacaagaaaatcgtcaacaagctacacggtcaataagatacagaaaaaatatatgccccgcgtcggaaaacgttttttaaagcatttttgagatcgcaggggctagaatacacacaaatgagcatatatattatacaaacacacatatgtatgattaaccacatagtttaactttttgatttgaatagttacaagtaaacgcaaacttggaaatttattctgttgtaatctttaacaatgcgcaggtaaaacaaggtaacaaaaattgaacttatattgaagtgtattcatttgcactgactttaatttcatttcatttcatttattttgctatatgttcgataatt…	>FBtr0081327 type=three_prime_UTR; loc=2L:20055224..20056373;MD5=377c310b636eb4d3ef513ebafac94f0c; length=1150; parent=FBgn0032840; release=r6.38; species=Dmel;	1057	-1	-1	506	FBgn0032840	2	1	0	0	1	sNPF
FBtr0306016	tcaaatccgaaacgagcacagagccagagcaattaactagctaaactgtacagtaaatgcacaaacactcaccatatttctacacgcacacaagcacacactgacaccaaactgttatacaattgagagcacctgtgataactttccctagacacaatttctatgcctaaagcgtatctttaaacggctttaatcacacgaactatgtagacacaataccggaggagtcgtcgtaccagcacggacactccaagtccttgtgcgagccggcggactccgatgaatgggagggagcaccgttgtccgcagccggcggagcaaacagcgagcttttgatgcgaatgagcggcagggaaccactcctgccacgcccatccaacacgcctcgtgcccagattc…	>FBtr0306016 type=three_prime_UTR; loc=2L:join(21131256..21131463,21132034..21134255);MD5=114d7f3622e1f6b7d0450a711fa3e2b0; length=2430; parent=FBgn0040297; release=r6.38; species=Dmel;	1445	-1	-1	969	FBgn0040297	2	1	0	0	1	Nhe2
FBtr0299912	gtatcaagcacggatggcgacgcggaggatctggaggatgatgagccaccggtgtcagcaccaccatctaacaatccaaaaagtttgcgtctgcatctattcccgtatgagatgttctaagctcacatttaaatgacctaggtcgtaagacaaaagttgaaaaaaaacgttggaaaatagtttcaaaataaggtttagaccaaaaaggtttataactatattaacatatgaatcggacaaatgttaagataatggaatagcaaaaattgtatataacaccagatatgaataacttaattaatttctcttggtcgtttaagtcgctttttaagatttttaacttccagttttgtgcttagtcccgatcaattcttattatgtaccacaaacatatatatc…	>FBtr0299912 type=three_prime_UTR; loc=2L:21132527..21134255;MD5=ce066afb9e9db645391c1cf0c2e7482d; length=1729; parent=FBgn0040297; release=r6.38; species=Dmel;	744	-1	-1	268	FBgn0040297	2	1	0	0	1	Nhe2
FBtr0333354	gccatccataacgcggtggttccgcgaacgtaaaaaccgcaattggaaaatggttgcacacatgtatagcgctcaaaaacgatatttatgaaccccagtgcggtcgattcaccggcttgagtgttcgaaaccttgttagttattatgctttcataaaatggtcatttatggaagatttctgcaataaacttaaccagaaaatatttaatttaattagttttataattttggtcatataattgtaaacttgtaaaagagcatgttcgatcctatgaaatctatattgatatagatttactgggcgaatataggaagaacacatgactttggtttcgggagaaactcaaaacatgacagaagtaaagaatgagcttcacttttcaaaatgattcttctaaa…	>FBtr0333354 type=three_prime_UTR; loc=2L:21340348..21342155;MD5=49ed08d8a528aaeec8e857c77dba894a; length=1808; parent=FBgn0023091; release=r6.38; species=Dmel;	-1	-1	-1	c(957, 1189)	FBgn0023091	2	0	0	0	2	dimm
FBtr0289953	atgcagtgcatcattaatatggttatatagctttagctgtctcaattccatggatttggataatcgtaattagtgtaaatacgttgtacatatgttatgcggttaatgtaggattgagtatgttgattaatttaaaaatatgcagtttttaatgatttgcaataattatcgtaatttaaacaattgtttaaatggtatttgtcttctgcctaacgattttataataataaattcatcgtataaaatt	>FBtr0289953 type=three_prime_UTR; loc=3R:complement(7486583..7486829);MD5=53a9074440c49c69de9dade60ce8f8c7; length=247; parent=FBgn0015569; release=r6.38; species=Dmel;	74	85	-1	-1	FBgn0015569	2	1	1	0	0	alpha-Est10
FBtr0305910	atgcagtgcatcattaatatggttatatagctttagctgtctcaattccatggatttggataatcgtaattagtgtaaatacgttgtacatatgttatgcggttaatgtaggattgagtatgttgattaatttaaaaatatgcagtttttaatgatttgcaataattatcgtaatttaaacaattgtttaaatggtatttgtcttctgcctaacgattttataataataaattcatcgtataaaatt	>FBtr0305910 type=three_prime_UTR; loc=3R:complement(7486583..7486829);MD5=53a9074440c49c69de9dade60ce8f8c7; length=247; parent=FBgn0015569; release=r6.38; species=Dmel;	74	85	-1	-1	FBgn0015569	2	1	1	0	0	alpha-Est10
FBtr0305911	atgcagtgcatcattaatatggttatatagctttagctgtctcaattccatggatttggataatcgtaattagtgtaaatacgttgtacatatgttatgcggttaatgtaggattgagtatgttgattaatttaaaaatatgcagtttttaatgatttgcaataattatcgtaatttaaacaattgtttaaatggtatttgtcttctgcctaacgattttataataataaattcatcgtataaaatt	>FBtr0305911 type=three_prime_UTR; loc=3R:complement(7486583..7486829);MD5=53a9074440c49c69de9dade60ce8f8c7; length=247; parent=FBgn0015569; release=r6.38; species=Dmel;	74	85	-1	-1	FBgn0015569	2	1	1	0	0	alpha-Est10
FBtr0081570	atggcgcacaatgccctaaaaagcaactagagttaaagcagattcttgtaaatattgaaggaaatggatgtggaagaataactcagtgtcagtaaaggaaaatcctgaatcaatcacattaaatcagatggagcaagcaattttctgaaaccggcgcaatatcaaaaaatttgttcaaatcgaaatggccgccatgttgaatgtagtggttaagtaatctaaaagcacataccttttgttaaacaatttgtgacttgtgtaaatagagagagattgagacagaagcagacaccctatagaagaaccaattgacaacagctccacaactcaaattggcctcgctgggcgtatcgattctattggcgatttcaaaatgcatacgagtttagttagtttaac…	>FBtr0081570 type=three_prime_UTR; loc=3R:7183112..7183702;MD5=b02c86dc7051418965210f0c378d94dd; length=591; parent=FBgn0002306; release=r6.38; species=Dmel;	c(47, 258)	-1	-1	-1	FBgn0002306	2	2	0	0	0	sas
FBtr0081571	atggcgcacaatgccctaaaaagcaactagagttaaagcagattcttgtaaatattgaaggaaatggatgtggaagaataactcagtgtcagtaaaggaaaatcctgaatcaatcacattaaatcagatggagcaagcaattttctgaaaccggcgcaatatcaaaaaatttgttcaaatcgaaatggccgccatgttgaatgtagtggttaagtaatctaaaagcacataccttttgttaaacaatttgtgacttgtgtaaatagagagagattgagacagaagcagacaccctatagaagaaccaattgacaacagctccacaactcaaattggcctcgctgggcgtatcgattctattggcgatttcaaaatgcatacgagtttagttagtttaac…	>FBtr0081571 type=three_prime_UTR; loc=3R:7183112..7183702;MD5=b02c86dc7051418965210f0c378d94dd; length=591; parent=FBgn0002306; release=r6.38; species=Dmel;	c(47, 258)	-1	-1	-1	FBgn0002306	2	2	0	0	0	sas
[truncated: 29,584 more rows]

## Sheet: 5'UTR
FBtr ID	Sequence	Annot data	PREa	PREc	PREg	PREt	FBgn	Total PRE	PREa	PREc	PREg	PREt	Gene name
[truncated: 30,106 more rows]

## Sheet: CDS
Transcript name	seq	annot	PREa	PREc	PREg	PREt	FBgn	Total PRE	PREa	PREc	PREg	PREt	Gene name	Gene Symbol
[truncated: 30,724 more rows]

## Sheet: ncRNA
FBtr ID	Sequence	Annot data	PREa	PREc	PREg	PREt	FBgn	Total PRE	PREa	PREc	PREg	PREt	Gene symbol	Gene name
[truncated: 3,047 more rows]

## Sheet: miRNA
FBtr	sequence	annotation	PREa	PREc	PREg	PREt	FBgn	Total PRE	PREa	PREc	PREg	PREt	Gene symbol	Gene name
[truncated: 747 more rows]

## Sheet: miscRNAs
FBtr ID	Sequence	Annot data	PREa	PREc	PREg	PREt	FBgn	Total PRE	PREa	PREc	PREg	PREt	Gene symbol	Gene name
[truncated: 446 more rows]

## Sheet: Total PRE
FBgn	5'UTR	CDS	3'UTR	ncRNA	miscRNA	miRNA	Total PRE	Gene Name	Gene Symbol
[truncated: 17,224 more rows]

[truncated: 2 more sheets: gene by loc, INFO]
