# Supplementary material
Source: HighWire-hosted journal article supplement (doi:10.1101/rna.079813.123)
Supplement: Supplemental_TableS2.xlsx [file Supplemental_TableS2.xlsx]

## Sheet: LacZ_vs_Pop2_Not1_Pum_DE
FB gene ID	Gene Name	Chromosome	Refeq Gene Start	RefSeq Gene End	Strand	Gene Length	Ctrl Mean Normalized Count	Ctrl Mean Normalized Count per Kb	Pop2 Mean Normalized Count	Pop2 Mean Normalized Count per Kb	Pop2_v_Ctrl log2 Fold Change	Pop2_v_Ctrl log2 Fold Change StdErr	Pop2_v_Ctrl p-value	Pop2_v_Ctrl padj	Not1 Mean Normalized Count	Not1 Mean Normalized Count per Kb	Not1_v_Ctrl log2 Fold Change	Not1_v_Ctrl log2 Fold Change StdErr	Not1_v_Ctrl p-value	Not1_v_Ctrl padj	Pum Mean Normalized Count	Pum Mean Normalized Count per Kb	Pum_v_Ctrl log2 Fold Change	Pum_v_Ctrl log2 Fold Change StdErr	Pum_v_Ctrl p-value	Pum_v_Ctrl padj
FBgn0000003	7SLRNA:CR32864	3R	6822500	6822798	+	299	0	0	0	0	NA	NA	NA	NA	0	0	NA	NA	NA	NA	0	0	NA	NA	NA	NA
FBgn0000008	a	2R	22136968	22172834	+	5414	39.4126	7.27975	125.075	23.1021	1.60835	0.295579	5.28773e-08	5.99386e-07	215.067	39.7242	2.33834	0.29769	3.99907e-15	6.32104e-14	48.2338	8.90909	0.234232	0.304301	0.441456	0.850297
FBgn0000014	abd-A	3R	16807214	16830049	-	5477	0.723128	0.13203	0.230361	0.0420597	-0.744969	3.65239	0.838379	NA	1.37275	0.250638	0.424458	3.60278	0.906215	NA	0	0	-1.94596	3.65239	0.594179	NA
FBgn0000015	Abd-B	3R	16927212	16972236	-	11791	0.328379	0.02785	0.631908	0.0535924	0.29052	2.17476	0.893729	NA	1.3102	0.111119	1.75717	2.0895	0.400375	NA	0.448843	0.0380665	-0.0877674	2.19646	0.968126	NA
FBgn0000017	Abl	3L	16615866	16647882	-	12819	2210.06	172.405	5329.6	415.758	1.26977	0.272564	3.18359e-06	2.5953e-05	9749.69	760.565	2.13938	0.272621	4.24643e-15	6.67707e-14	2061.25	160.796	-0.10075	0.272789	0.711878	0.939527
FBgn0000018	abo	2L	10973443	10975293	-	1794	75.7729	42.2368	51.7539	28.8483	-0.522064	0.394308	0.185504	0.30018	28.6188	15.9525	-1.17727	0.419998	0.0050624	0.0125171	63.7672	35.5447	-0.227978	0.390072	0.558917	0.896719
FBgn0000022	ac	X	370031	370947	+	917	0	0	0.505966	0.551762	1.05898	4.37319	0.808662	NA	0	0	0	4.40736	1	NA	0	0	0	4.40736	1	NA
FBgn0000024	Ace	3R	13222951	13259517	-	8473	0	0	0.884891	0.104437	1.80195	2.17921	0.408303	NA	0.276259	0.0326046	1.03168	2.3003	0.653792	NA	0.896	0.105748	1.87436	2.14989	0.383296	NA
FBgn0000028	acj6	X	15350239	15379064	-	4433	3.58591	0.808914	6.87284	1.55038	1.17834	1.07156	0.271485	0.401182	18.9209	4.26818	2.48153	1.06649	0.0199755	0.0412866	1.69266	0.381833	-0.807527	1.15615	0.484888	0.86314
FBgn0000032	Acph-1	3R	29991144	29993411	-	2024	274.69	135.716	569.908	281.575	1.05026	0.21393	9.13741e-07	8.37626e-06	718.045	354.765	1.36316	0.215772	2.65636e-10	2.3449e-09	290.996	143.773	0.0807544	0.215399	0.70773	0.938704
FBgn0000036	nAChRalpha1	3R	24393896	24457157	-	11027	0.723128	0.065578	0.230361	0.0208906	-0.744982	2.86078	0.794546	0.860403	3.02175	0.274032	2.43834	2.69399	0.365411	0.468971	0	0	-1.94597	2.86078	0.496362	NA
FBgn0000037	mAChR-A	2R	24378630	24390294	-	5425	0.693401	0.127816	1.66157	0.30628	0.991052	1.61177	0.53863	NA	0.276259	0.0509233	-0.729548	1.8588	0.6947	NA	0.638748	0.117741	-0.320812	1.72323	0.852312	NA
FBgn0000038	nAChRbeta1	3L	4429349	4435993	+	2974	1.09507	0.368213	0.546315	0.183697	-1.10776	2.45257	0.651503	NA	0	0	-2.19855	2.52539	0.383984	NA	0.448843	0.150922	-1.3715	2.45566	0.576498	NA
FBgn0000039	nAChRalpha2	3R	24485428	24491147	+	2387	0.328379	0.13757	0	0	-1.70673	4.40736	0.698575	NA	0	0	-0.913739	4.40736	0.835759	NA	0	0	-1.94592	4.40736	0.658839	NA
FBgn0000042	Act5C	X	5900861	5905399	+	2978	76398.3	25654.2	52905.2	17765.3	-0.530079	0.330788	0.109051	0.198727	62932	21132.3	-0.279807	0.330804	0.397641	0.501943	49402.4	16589.1	-0.628902	0.330786	0.0572714	0.565145
FBgn0000043	Act42A	2R	6013910	6015689	-	1626	4169.77	2564.44	4048.29	2489.72	-0.0411949	0.202915	0.839123	0.894952	4854.26	2985.4	0.220852	0.203241	0.27719	0.375769	3087.76	1898.99	-0.431846	0.20295	0.0333497	0.489547
FBgn0000044	Act57B	2R	20944021	20946431	+	1724	1.78155	1.03338	1.82896	1.06088	0.108085	1.08891	0.920932	0.950967	4.60821	2.67298	1.07468	1.06481	0.312848	0.414613	2.01726	1.17011	0.244966	1.0571	0.816745	0.962683
FBgn0000045	Act79B	3L	21985210	21987190	+	1619	7.14902	4.4157	3.65792	2.25937	-0.841806	0.85394	0.324236	0.457772	5.45214	3.36759	-0.866704	0.911611	0.341737	0.445441	2.63833	1.62961	-1.30381	0.868388	0.13325	0.676224
FBgn0000046	Act87E	3R	13425983	13428375	+	1989	3.93504	1.9784	6.03319	3.03328	0.544778	0.747678	0.46623	0.598362	10.2504	5.15352	1.08119	0.758944	0.154275	0.233333	5.40967	2.71979	0.384005	0.744385	0.605946	0.908707
FBgn0000047	Act88F	3R	15439969	15442177	+	1595	4.19013	2.62704	3.61647	2.26738	-0.333521	0.878674	0.704262	0.79473	7.36225	4.61583	0.481692	0.878488	0.583472	0.676894	3.3781	2.11793	-0.396325	0.86831	0.648078	0.920141
FBgn0000052	Pfas	2L	6041181	6046050	-	4434	568.321	128.173	394.004	88.8598	-0.532316	0.163154	0.00110373	0.00448271	334.968	75.5452	-0.775878	0.169082	4.45848e-06	2.08361e-05	494.252	111.469	-0.202976	0.161728	0.209464	0.729447
FBgn0000053	Gart	2L	7014623	7023898	-	4780	380.02	79.502	332.348	69.5288	-0.197573	0.121391	0.103614	0.191127	401.776	84.0537	0.0607493	0.125234	0.627614	0.714378	402.014	84.1034	0.0766719	0.119309	0.520462	0.88068
FBgn0000055	Adh	2L	14615552	14618902	+	2254	0	0	0	0	NA	NA	NA	NA	0	0	NA	NA	NA	NA	0	0	NA	NA	NA	NA
FBgn0000056	Adhr	2L	14615552	14618902	+	2116	0	0	0	0	NA	NA	NA	NA	0	0	NA	NA	NA	NA	0	0	NA	NA	NA	NA
FBgn0000057	adp	2R	18151704	18154060	+	2291	146.574	63.9784	126.706	55.3059	-0.209964	0.171095	0.219755	0.342172	112.699	49.1918	-0.427922	0.1831	0.0194345	0.0403064	159.886	69.7887	0.125692	0.166848	0.451248	0.852222
FBgn0000061	al	2L	378112	387439	+	1806	0	0	0	0	NA	NA	NA	NA	0	0	NA	NA	NA	NA	0	0	NA	NA	NA	NA
FBgn0000063	Mps1	3R	17671271	17673828	+	2141	156.454	73.075	312.48	145.951	0.972276	0.179392	5.96544e-08	6.67024e-07	355.76	166.165	1.16976	0.183254	1.7335e-10	1.5669e-09	168.511	78.7064	0.0790179	0.182155	0.664438	0.924194
FBgn0000064	Ald1	3R	26254069	26261591	-	3809	4465.18	1172.27	1970.11	517.225	-1.18134	0.117382	7.96312e-24	7.2122e-22	1373.26	360.529	-1.71137	0.119943	3.45119e-46	5.12417e-44	4168.54	1094.39	-0.100209	0.116658	0.390344	0.827139
FBgn0000071	Ama	3R	6762593	6765261	+	1946	0	0	0.230361	0.118377	0.216791	4.40736	0.960769	NA	0	0	0	4.40736	1	NA	0.207585	0.106672	-0.022405	4.40736	0.995944	NA
FBgn0000075	amd	2L	19110154	19114110	+	2224	0	0	0.315954	0.142066	0.216798	2.26866	0.923868	NA	1.2865	0.578462	2.70282	2.08426	0.194708	NA	0.672421	0.302348	1.45921	2.11022	0.489255	NA
FBgn0000077	amx	X	9245915	9247336	-	1422	45.9677	32.3261	76.7616	53.9814	0.668666	0.251652	0.00788157	0.0236447	96.5771	67.9164	0.984117	0.258353	0.000139417	0.00048923	111.489	78.4031	1.21183	0.245566	8.02082e-07	0.000727693
FBgn0000078	Amy-d	2R	17124764	17126369	+	1606	5.3011	3.30081	3.49053	2.17343	-0.504726	0.839042	0.547473	0.669972	1.08134	0.673311	-1.77183	1.03972	0.0883542	0.146722	3.08549	1.92123	-0.655239	0.833332	0.431699	0.846216
FBgn0000079	Amy-p	2R	17118636	17120303	-	1668	41.5958	24.9375	28.0701	16.8286	-0.61711	0.358515	0.0851974	0.164808	34.3258	20.579	-0.514272	0.375677	0.171024	0.25422	52.9728	31.7582	0.305671	0.342939	0.372753	0.821574
FBgn0000083	AnxB9	3R	21065241	21070917	+	2073	1355.11	653.696	2101.3	1013.65	0.632639	0.153287	3.67304e-05	0.000226458	2773.58	1337.96	1.03555	0.153933	1.72893e-11	1.75943e-10	1323.26	638.333	-0.0343438	0.153576	0.823048	0.963903
FBgn0000084	AnxB10	X	20171445	20173514	-	1247	145.589	116.751	87.2929	70.0023	-0.722165	0.382059	0.0587325	0.122201	120.998	97.0314	-0.28043	0.386991	0.468671	0.570087	99.8717	80.0896	-0.523555	0.379839	0.168092	0.702081
FBgn0000092	dyw	X	2692732	2693886	-	1013	3.35016	3.30717	2.2305	2.20188	-0.667666	1.33275	0.616393	0.725589	0	0	-3.78382	1.7064	0.0265936	0.0527504	2.97893	2.9407	-0.230419	1.29672	0.858964	0.973068
FBgn0000094	Anp	3R	30209948	30210382	+	373	0	0	0	0	NA	NA	NA	NA	0	0	NA	NA	NA	NA	0	0	NA	NA	NA	NA
FBgn0000097	aop	2L	2156484	2178754	-	5454	1364.18	250.124	4402.17	807.146	1.68773	0.267371	2.74886e-10	4.66225e-09	6898.9	1264.93	2.33401	0.267492	2.64928e-18	5.89547e-17	1423.63	261.025	0.0590535	0.267748	0.825438	0.963903
FBgn0000100	RpLP0	3L	22075867	22077487	+	1328	3991.77	3005.85	910.864	685.892	-2.13136	0.63554	NA	NA	2411.07	1815.56	-0.729838	0.635492	NA	NA	1931.6	1454.52	-1.04682	0.635251	NA	NA
FBgn0000108	Appl	X	530501	579044	+	6383	139.13	21.7969	34.0689	5.33744	-2.01737	0.535808	0.000166488	0.000860171	72.631	11.3788	-1.04099	0.537506	0.0527813	0.0949246	73.9079	11.5789	-0.899954	0.526455	0.0873658	0.636882
FBgn0000109	Aprt	3L	1883795	1885019	-	1021	94.7125	92.7644	53.499	52.3987	-0.793026	0.404194	0.0497633	0.106626	47.4406	46.4649	-0.858189	0.418102	0.0401131	0.0751405	82.6196	80.9202	-0.163451	0.39832	0.681549	0.930913
FBgn0000114	bru1	2L	12175004	12313438	+	7791	8.50609	1.09178	13.4621	1.72791	0.725314	0.519677	0.162804	0.272554	25.133	3.22591	1.47113	0.52179	0.00481152	0.0119831	7.3276	0.940521	-0.14304	0.540732	0.791371	0.956624
FBgn0000115	Arl1	3L	15983135	15984362	+	863	719.29	833.476	1087.13	1259.7	0.594164	0.29157	0.0415692	0.0921195	1097.19	1271.37	0.619156	0.292701	0.0344027	0.0658381	736.189	853.058	0.0318965	0.291782	0.912952	0.9845
FBgn0000116	Argk	3L	9048781	9066027	-	3504	0.693401	0.197888	9.90863	2.82781	3.57139	1.1604	0.00208589	0.00762386	49.7733	14.2047	5.76926	1.14759	4.97533e-07	2.72275e-06	2.67369	0.76304	1.68084	1.21032	0.164907	0.700855
FBgn0000117	arm	X	1891401	1900646	-	3564	4290.47	1203.84	4725.55	1325.91	0.138629	0.114866	0.227481	0.351139	3904.52	1095.54	-0.130416	0.115768	0.25994	0.35717	3619.35	1015.53	-0.246049	0.114916	0.0322651	0.479517
FBgn0000119	arr	2R	13453640	13483229	-	6024	262.078	43.5056	394.163	65.432	0.576906	0.399995	0.149222	0.254761	454.488	75.4463	0.785706	0.401766	0.0505086	0.0914181	321.884	53.4337	0.284354	0.400049	0.477209	0.86166
FBgn0000120	Arr1	2L	18078269	18081307	+	2476	0	0	0	0	NA	NA	NA	NA	0	0	NA	NA	NA	NA	0	0	NA	NA	NA	NA
FBgn0000121	Arr2	3L	8647261	8648936	-	1547	0	0	2.42052	1.56465	3.30351	2.06324	0.109348	0.199105	1.10504	0.714309	2.49673	2.15983	0.247688	0.343644	0.207585	0.134185	-0.0224042	2.32705	0.992318	NA
FBgn0000137	ase	X	460747	463176	+	2430	0	0	0	0	NA	NA	NA	NA	0	0	NA	NA	NA	NA	0	0	NA	NA	NA	NA
FBgn0000139	ash2	3R	24650125	24653376	+	2235	423.462	189.469	576.486	257.935	0.461363	0.18545	0.0128538	0.0355037	627.836	280.911	0.582832	0.188083	0.00194302	0.00533918	318.874	142.673	-0.393504	0.186799	0.0351553	0.495436
FBgn0000140	asp	3R	24753849	24760513	+	6338	860.503	135.769	689.754	108.828	-0.32379	0.243474	0.183559	0.297725	361.467	57.0317	-1.2368	0.248638	6.54849e-07	3.51361e-06	942.557	148.715	0.12646	0.24284	0.602538	0.906596
FBgn0000146	aub	2L	10997819	11001476	-	3015	94.2044	31.2452	22.5047	7.46424	-2.07599	0.265094	4.83495e-15	1.56954e-13	17.4638	5.79231	-2.5418	0.31014	2.49232e-16	4.57868e-15	97.6295	32.3813	0.0295375	0.225487	0.89578	0.981141
FBgn0000147	aurA	3R	11963124	11964826	+	1577	77.952	49.4305	128.741	81.6365	0.677533	0.195098	0.000515107	0.00230614	96.4692	61.1726	0.299325	0.208241	0.150605	0.228788	108.852	69.0249	0.437318	0.195073	0.0249731	0.452137
FBgn0000150	awd	3R	31745172	31746077	-	727	1602.45	2204.2	473.129	650.797	-1.75719	0.322844	5.24365e-08	5.96629e-07	434.689	597.922	-1.87951	0.325547	7.7685e-09	5.62875e-08	1201.52	1652.72	-0.412376	0.321629	0.19979	0.725865
FBgn0000152	Axs	X	16680089	16683895	-	2575	82.9648	32.2193	105.758	41.0709	0.336679	0.200689	0.0934218	0.177124	100.84	39.161	0.264847	0.211222	0.209885	0.300495	78.0018	30.292	-0.0959411	0.20251	0.635672	0.918204
FBgn0000153	b	2L	13821248	13823979	+	2135	1.70827	0.800124	0	0	-3.54426	3.4439	0.303413	NA	0	0	-2.75127	3.4439	0.424359	NA	0.447157	0.209441	-1.92617	3.39339	0.57029	NA
FBgn0000157	Dll	2R	24814822	24835667	+	3309	1.02178	0.308788	2.42052	0.731495	0.981833	1.19939	0.413008	0.546794	9.79263	2.95939	2.81578	1.15301	0.0146017	0.03154	0.929673	0.280953	-0.418945	1.31254	0.749584	0.948714
FBgn0000158	bam	3R	25243039	25245109	-	1946	3.0287	1.55637	1.36824	0.703101	-1.27408	1.49902	0.395357	0.530717	0	0	-3.69001	1.79601	0.0399212	0.074812	0.947353	0.486821	-1.81535	1.5301	0.235452	NA
FBgn0000163	baz	X	17160006	17200728	+	10881	202.75	18.6334	404.657	37.1893	0.968657	0.193926	5.88385e-07	5.59769e-06	686.593	63.1001	1.72626	0.19502	8.61945e-19	2.02244e-17	223.242	20.5167	0.109377	0.195778	0.576379	0.90181
FBgn0000166	bcd	3R	6755842	6759466	-	2536	0	0	0	0	NA	NA	NA	NA	0	0	NA	NA	NA	NA	0	0	NA	NA	NA	NA
FBgn0000173	ben	X	13996345	13999805	+	2072	3968.54	1915.32	2313.35	1116.48	-0.778063	0.493078	0.114572	0.206985	4000.41	1930.7	0.0100603	0.493169	0.983725	0.988952	2562.42	1236.69	-0.630516	0.49302	0.200937	0.72716
FBgn0000179	bi	X	4412856	4485647	+	6095	0.723128	0.118643	0.252983	0.0415066	-0.744985	2.68643	0.781539	NA	1.37275	0.225225	0.277348	2.6298	0.916008	NA	0.911994	0.14963	0.933991	2.5184	0.710736	NA
FBgn0000180	bib	2L	9984645	9995538	+	3276	38.7696	11.8344	2218.75	677.275	5.75782	0.263637	9.68654e-106	8.7731e-102	3968.7	1211.45	6.59673	0.263788	5.0392e-138	4.564e-134	133.892	40.8704	1.709	0.269691	2.34461e-10	5.99787e-07
FBgn0000181	bic	2R	12870249	12871794	+	1546	19581.7	12666	6887.72	4455.19	-1.50723	0.352596	1.91415e-05	0.000127568	8385.45	5423.97	-1.22446	0.352705	0.000517334	0.00162072	13908.7	8996.56	-0.493344	0.352529	0.161681	0.699237
FBgn0000182	BicC	2L	16042047	16048757	+	4547	0	0	0	0	NA	NA	NA	NA	0	0	NA	NA	NA	NA	0	0	NA	NA	NA	NA
FBgn0000183	BicD	2L	17459605	17473215	-	5498	1181.77	214.946	1380.55	251.101	0.221474	0.148735	0.136475	0.237475	1206.65	219.471	0.0415311	0.15079	0.782992	0.842428	1102.63	200.551	-0.103044	0.148808	0.488649	0.864738
FBgn0000206	boss	3R	25961994	25966948	+	3013	0	0	0	0	0	4.40736	1	NA	0.25256	0.0838236	0.992539	4.38784	0.821044	NA	0	0	0	4.40736	1	NA
FBgn0000212	brm	3L	15970082	15982869	-	5597	2665.09	476.163	3495.46	624.524	0.389065	0.173053	0.0245606	0.060456	2351.46	420.128	-0.182221	0.174171	0.295462	0.396244	2535.31	452.977	-0.0743626	0.173126	0.667539	0.925428
FBgn0000216	Brd	3L	14972667	14973198	+	532	0	0	0	0	NA	NA	NA	NA	0	0	NA	NA	NA	NA	0	0	NA	NA	NA	NA
FBgn0000221	brn	X	4104342	4105791	+	1450	106.235	73.2654	148.638	102.509	0.466974	0.247204	0.058889	0.122442	97.0563	66.9354	-0.0758014	0.260321	0.770911	0.833091	139.825	96.431	0.376872	0.246431	0.126186	0.670486
FBgn0000227	Bsg25A	2L	4683052	4684461	-	1352	0	0	0	0	NA	NA	NA	NA	0	0	NA	NA	NA	NA	0	0	NA	NA	NA	NA
FBgn0000228	Bsg25D	2L	5271728	5278548	-	4953	436.938	88.2168	819.219	165.399	0.895562	0.196961	5.44428e-06	4.17518e-05	829.967	167.569	0.918801	0.199043	3.91044e-06	1.85041e-05	540.296	109.085	0.294498	0.197436	0.1358	0.681736
FBgn0000229	bsk	2L	10247502	10250501	-	2018	1250.6	619.724	1141.66	565.74	-0.131116	0.227143	0.563778	0.684355	908.068	449.984	-0.445502	0.229117	0.051843	0.0933297	1407.9	697.67	0.171443	0.226804	0.449702	0.851991
FBgn0000233	btd	X	9694186	9697558	+	2934	0	0	0	0	0	4.40736	1	NA	0.528819	0.180238	1.67843	4.35409	0.69988	NA	0	0	0	4.40736	1	NA
FBgn0000239	bur	2L	21174182	21179683	-	3116	1279.67	410.676	951.227	305.272	-0.428927	0.201274	0.0330842	0.076871	574.4	184.339	-1.12717	0.205012	3.83998e-08	2.51109e-07	1187.16	380.99	-0.109208	0.200802	0.58654	0.903723
FBgn0000241	bw	2R	23527805	23538499	-	2738	1.31352	0.479736	0.568937	0.207793	-1.43163	1.87415	0.444938	NA	1.05764	0.386282	-0.116052	1.76922	0.9477	NA	0.690101	0.252046	-1.11032	1.78565	0.534071	NA
FBgn0000244	by	3R	9528238	9533011	-	4774	100.516	21.0549	32.6829	6.84603	-1.64894	0.382568	1.63105e-05	0.000110324	60.8976	12.7561	-0.810215	0.385243	0.0354547	0.0675602	100.747	21.1032	-0.0266079	0.366195	0.942076	0.988714
FBgn0000246	c(3)G	3R	15789473	15792579	-	2629	215.29	81.8906	67.9979	25.8646	-1.67526	0.428212	9.14547e-05	0.000504142	26.5898	10.114	-2.87354	0.459457	3.99519e-10	3.44943e-09	270.796	103.003	0.31877	0.420647	0.448566	0.851968
FBgn0000247	ca	3R	29806811	29815047	+	7026	481.197	68.488	798.802	113.692	0.725546	0.429335	0.0910414	0.173519	1075.57	153.084	1.15805	0.429938	0.0070702	0.0168291	527.369	75.0596	0.126367	0.429557	0.768621	0.953774
FBgn0000250	cact	2L	16313036	16326207	-	3324	1748.06	525.889	1883.01	566.489	0.10528	0.131734	0.424184	0.558082	2418.95	727.722	0.457472	0.132612	0.00056121	0.0017431	1977.25	594.84	0.175988	0.131512	0.180835	0.710412
FBgn0000251	cad	2L	20770731	20783135	+	2570	1.35016	0.525354	2.77302	1.079	0.872201	1.41437	0.537452	0.661014	2.38299	0.927232	0.380263	1.5101	0.801185	0.857115	0	0	-3.63102	1.78629	0.0420812	0.528565
FBgn0000253	Cam	2R	12259398	12278809	+	5812	52565.1	9044.23	30615.5	5267.64	-0.779818	0.808019	NA	NA	76665.2	13190.8	0.544437	0.808018	NA	NA	27970.6	4812.56	-0.910168	0.808018	NA	NA
FBgn0000256	capu	2L	3872646	3902860	-	6240	171.898	27.5477	196.372	31.4699	0.206169	0.289739	0.476732	0.607195	356.882	57.1926	1.03023	0.291031	0.000400211	0.00128127	151.101	24.215	-0.172444	0.290199	0.552361	0.894842
FBgn0000257	car	X	19566019	19569401	+	3205	88.4249	27.5897	134.406	41.9362	0.594262	0.197721	0.00265089	0.00931306	132.475	41.3337	0.537774	0.206649	0.00925883	0.0212782	99.0134	30.8934	0.150887	0.199251	0.448889	0.851968
FBgn0000259	CkIIbeta	X	11792533	11801587	+	5705	8270.66	1449.72	6736.52	1180.81	-0.295765	0.528687	0.575867	0.693106	11313.7	1983.13	0.451525	0.52872	0.393106	0.497301	4809.57	843.044	-0.781849	0.528701	0.139191	0.686137
FBgn0000261	Cat	3L	18822604	18828188	+	1993	427.795	214.649	424.871	213.182	-0.0180182	0.235799	0.93909	0.962905	392.306	196.842	-0.104146	0.239493	0.663664	0.746591	416.589	209.026	-0.046201	0.235407	0.844407	0.969143
FBgn0000273	Pka-C1	2L	9682315	9699297	-	5725	3891.36	679.714	3665.74	640.304	-0.0854472	0.267137	0.749072	0.829239	3934.29	687.212	0.0128025	0.267479	0.961825	0.973851	2642.1	461.502	-0.557861	0.267184	0.0368044	0.506801
FBgn0000274	Pka-C2	3R	30695537	30697138	-	1349	0	0	0	0	NA	NA	NA	NA	0	0	NA	NA	NA	NA	0	0	NA	NA	NA	NA
FBgn0000276	CecA1	3R	30210874	30211273	+	339	0.730044	2.15352	0	0	-2.48213	4.3686	0.569916	NA	1.37275	4.0494	-0.282445	4.32437	0.947923	NA	0	0	-2.72133	4.3686	0.533331	NA
FBgn0000277	CecA2	3R	30212156	30212568	+	355	0	0	0.568937	1.60264	1.20777	4.36101	0.78182	NA	0	0	0	4.40736	1	NA	0	0	0	4.40736	1	NA
FBgn0000278	CecB	3R	30213315	30213797	-	425	1.05842	2.49041	1.62122	3.81463	0.391771	1.28954	0.761275	0.837772	1.3102	3.08282	0.498523	1.34277	0.71044	0.784248	2.25684	5.3102	0.886981	1.23521	0.472708	NA
FBgn0000279	CecC	3R	30216484	30216938	+	386	25.4747	65.9967	43.6054	112.967	0.837553	0.367104	0.022518	0.0563696	47.9302	124.171	1.11416	0.376681	0.00309818	0.00811458	47.4185	122.846	0.958149	0.363225	0.00834219	0.287038
FBgn0000280	Cec-Psi1	3R	30211527	30211753	+	166	0	0	0	0	NA	NA	NA	NA	0	0	NA	NA	NA	NA	0	0	NA	NA	NA	NA
FBgn0000281	Cec2	3R	30212903	30213142	+	201	0	0	0	0	NA	NA	NA	NA	0	0	NA	NA	NA	NA	0	0	NA	NA	NA	NA
FBgn0000283	Cp190	3R	15270432	15275241	-	4293	3599.32	838.416	3216.77	749.307	-0.162592	0.106007	0.125083	0.221698	1634.33	380.696	-1.12795	0.10863	2.94978e-25	1.14662e-23	3542.43	825.164	-0.0236845	0.105815	0.822891	0.963903
FBgn0000286	Cf2	2L	4876891	4883107	-	4315	577.413	133.815	484.244	112.223	-0.256532	0.2191	0.241661	0.367139	771.853	178.877	0.396239	0.220256	0.0720192	0.123707	515.204	119.398	-0.168341	0.218557	0.441157	0.850297
FBgn0000287	salr	2L	11358873	11373636	+	5536	0	0	0	0	0	4.40736	1	NA	0.25256	0.0456215	0.992522	4.38784	0.821047	NA	0.448843	0.0810771	0.876967	4.36772	0.840868	NA
FBgn0000289	cg	2R	14173693	14182838	+	5429	1509.24	277.996	2225.77	409.977	0.557746	0.194393	0.00411555	0.0135741	2569.36	473.266	0.758405	0.195054	0.000100996	0.000364868	1839.38	338.806	0.282629	0.194405	0.145996	0.691481
FBgn0000299	Col4a1	2L	5029609	5037279	+	6165	15.5348	2.51984	5.82545	0.944923	-1.43323	0.611173	0.0190245	0.0490039	9.61159	1.55906	-0.806471	0.618821	0.192494	0.280112	10.938	1.77422	-0.524278	0.566967	0.355119	0.816395
FBgn0000303	ChAT	3R	18705501	18732344	+	4011	0	0	0	0	0	3.69043	1	NA	1.649	0.411121	2.31263	3.60094	0.520725	NA	0.223579	0.0557413	-0.0224073	3.69043	0.995155	NA
FBgn0000307	chif	2L	16342430	16352628	-	7747	5608.88	724.007	4584.43	591.768	-0.291168	0.236774	0.218798	0.341135	3921.61	506.21	-0.520829	0.237225	0.0281273	0.055272	4898.97	632.37	-0.195515	0.23672	0.408842	0.836154
FBgn0000308	chic	2L	5972115	5981018	-	2632	49573.9	18835.1	27935.4	10613.8	-0.827445	0.516428	0.109101	0.198779	49023	18625.7	-0.0162453	0.516435	0.974905	0.982827	30099.6	11436	-0.719791	0.516424	0.163379	0.700734
FBgn0000316	cin	X	255674	258469	+	2110	343.903	162.987	236.639	112.151	-0.534604	0.23012	0.0201712	0.0514396	176.312	83.5601	-0.883094	0.238199	0.000209421	0.000710918	369.166	174.96	0.106863	0.227771	0.638949	0.918489
FBgn0000317	ck	2L	15044963	15057862	-	7404	479.491	64.7611	377.539	50.9912	-0.35271	0.302068	0.242947	0.368387	376.4	50.8374	-0.349058	0.305114	0.252614	0.349248	411.93	55.6361	-0.227717	0.301514	0.450102	0.852219
FBgn0000318	cl	2L	5520135	5521382	+	716	2845.12	3973.64	2908.92	4062.74	0.0320094	0.219246	0.883923	0.926704	3005.86	4198.14	0.0845285	0.219796	0.700551	0.777084	3606.51	5037.03	0.342295	0.219106	0.118233	0.669019
FBgn0000319	Chc	X	15827986	15835490	-	6008	3441.41	572.805	3697.75	615.471	0.102138	0.138149	0.459706	0.592263	4595.9	764.964	0.418297	0.138622	0.00254841	0.00679251	2743.12	456.578	-0.328923	0.138222	0.0173279	0.382735
FBgn0000320	eya	2L	6527447	6546976	-	3690	0.328379	0.0889916	42.6735	11.5646	6.4814	1.25629	2.48084e-07	2.52744e-06	16.3441	4.42928	5.18034	1.27389	4.77135e-05	0.000184204	0.464837	0.125972	-0.0862567	1.61333	0.957361	0.992918
FBgn0000326	clt	2R	21617061	21619079	-	1844	219.631	119.106	230.307	124.895	0.0776712	0.180571	0.667092	0.766343	231.802	125.706	0.140678	0.186394	0.450407	0.554031	240.99	130.689	0.144471	0.17927	0.420311	0.840836
FBgn0000330	cm	X	7009006	7011145	-	1774	59.094	33.3111	99.8102	56.2628	0.786311	0.216332	0.000278255	0.00135565	146.819	82.7616	1.27161	0.220289	7.81276e-09	5.65177e-08	62.3244	35.1321	0.105358	0.2208	0.633244	0.918098
FBgn0000337	cn	2R	7782797	7785067	-	1790	0.365022	0.203923	0.230361	0.128693	-0.74496	4.34177	0.863768	NA	0.276259	0.154335	0.100084	4.31777	0.981507	NA	0	0	-1.94594	4.34177	0.654015	NA
FBgn0000339	cni	2L	16309292	16310726	-	1182	177.848	150.464	104.179	88.1375	-0.780182	0.262492	0.00295662	0.0102168	86.1838	72.9136	-0.939095	0.274031	0.00061038	0.0018797	196.897	166.58	0.138358	0.256831	0.590085	0.903907
FBgn0000346	comt	X	13259021	13262488	+	3087	80.5383	26.0895	87.2844	28.2748	0.0845581	0.240292	0.724916	0.811064	97.9798	31.7395	0.190786	0.249576	0.444605	0.548477	76.263	24.7046	-0.105196	0.239803	0.660896	0.923741
FBgn0000351	cort	2L	6674682	6676635	-	1655	7.21192	4.35765	4.35389	2.63075	-0.786488	0.714462	0.270979	0.400694	7.26746	4.39121	-0.361726	0.734173	0.622226	0.710449	13.9574	8.43347	0.870264	0.64748	0.178923	0.710412
FBgn0000352	cos	2R	7382176	7387115	-	4763	665.765	139.778	1285.49	269.891	0.942734	0.125671	6.30388e-14	1.78979e-12	1082.69	227.313	0.68074	0.128364	1.13777e-07	6.90963e-07	701.631	147.309	0.0685078	0.126599	0.58841	0.903907
FBgn0000355	Cp15	3L	8728481	8729066	+	515	0	0	0	0	NA	NA	NA	NA	0	0	NA	NA	NA	NA	0	0	NA	NA	NA	NA
FBgn0000356	Cp16	3L	8731944	8732599	+	522	0	0	0	0	NA	NA	NA	NA	0	0	NA	NA	NA	NA	0	0	NA	NA	NA	NA
FBgn0000357	Cp18	3L	8726791	8727613	+	649	1.74491	2.68861	1.26002	1.94148	-0.401226	1.33703	0.76411	0.839871	0.528819	0.814822	-1.11389	1.49104	0.455029	0.558731	1.72465	2.6574	0.0441577	1.27524	0.972377	NA
FBgn0000358	Cp19	3L	8729865	8730604	+	651	0	0	0	0	NA	NA	NA	NA	0	0	NA	NA	NA	NA	0	0	NA	NA	NA	NA
FBgn0000359	Cp36	X	8479319	8480523	+	1116	0	0	0	0	NA	NA	NA	NA	0	0	NA	NA	NA	NA	0	0	NA	NA	NA	NA
FBgn0000360	Cp38	X	8481837	8483311	+	1249	0	0	0	0	0	4.40736	1	NA	0	0	0	4.40736	1	NA	0.241258	0.193161	-0.0223957	4.40736	0.995946	NA
FBgn0000370	crc	2L	21310866	21319527	+	3423	2667.78	779.369	918.113	268.219	-1.53636	0.213812	6.6932e-13	1.63397e-11	844.437	246.695	-1.66464	0.215905	1.25732e-14	1.86071e-13	2199.07	642.44	-0.276634	0.212895	0.193808	0.722424
FBgn0000376	crm	X	2734248	2738773	-	3886	156.348	40.2336	242.508	62.4056	0.605752	0.184698	0.00103922	0.00425698	249.699	64.2559	0.636774	0.190404	0.0008248	0.00246623	140.146	36.0643	-0.188933	0.187524	0.313689	0.80303
FBgn0000377	crn	X	2247594	2249983	-	2332	486.532	208.633	935.534	401.172	0.953373	0.315056	0.0024778	0.00880747	1244.49	533.66	1.36241	0.315776	1.59973e-05	6.77046e-05	357.171	153.161	-0.435696	0.316187	0.168212	0.702081
FBgn0000382	csw	X	2094234	2115701	+	8732	467.106	53.4936	814.933	93.3272	0.795723	0.244524	0.00113726	0.00459623	1204.6	137.953	1.34781	0.245334	3.93444e-08	2.56546e-07	442.691	50.6976	-0.0849178	0.245287	0.729194	0.945512
FBgn0000384	cta	2L	22981816	22992951	+	2764	848.562	307.005	1282	463.822	0.589726	0.216498	0.00645109	0.0199207	1227.62	444.145	0.533716	0.217892	0.0143074	0.0309763	1189.41	430.324	0.481385	0.216406	0.0261176	0.455512
FBgn0000392	cup	2L	6663664	6674780	+	4306	0	0	0	0	NA	NA	NA	NA	0	0	NA	NA	NA	NA	0	0	NA	NA	NA	NA
FBgn0000394	cv	X	5690002	5693084	+	2053	364.776	177.68	459.3	223.722	0.320126	0.197644	0.105295	0.193479	392.476	191.172	0.111509	0.202111	0.581139	0.674814	512.732	249.748	0.479083	0.196893	0.0149653	0.368257
FBgn0000395	cv-2	2R	21355015	21379464	-	4329	345.905	79.9041	579.505	133.866	0.747249	0.272049	0.00601907	0.0187917	1569.47	362.547	2.17422	0.271823	1.25784e-15	2.11359e-14	239.97	55.4332	-0.52478	0.273858	0.0553332	0.56324
FBgn0000404	CycA	3L	11826719	11833578	-	2919	2526.04	865.378	2587.14	886.31	0.0356611	0.162864	0.826679	0.886836	2522.79	864.266	-0.0092943	0.163777	0.954744	0.968865	2537.91	869.445	0.00788721	0.16277	0.961353	0.993683
FBgn0000405	CycB	2R	22803521	22806948	-	3047	613.88	201.47	424.388	139.281	-0.536336	0.123779	1.47084e-05	0.000100691	222.187	72.9199	-1.42583	0.135304	5.7724e-26	2.35498e-24	626.848	205.726	0.0254253	0.121505	0.83425	0.965324
FBgn0000406	Cyt-b5-r	2L	16788774	16790721	-	1557	1.41653	0.909781	0	0	-3.2262	2.39987	0.178845	NA	0	0	-2.4332	2.39987	0.310636	NA	0.431163	0.276919	-1.64193	2.33196	0.481371	NA
FBgn0000411	D	3L	14175610	14178620	-	2935	0	0	0	0	NA	NA	NA	NA	0	0	NA	NA	NA	NA	0	0	NA	NA	NA	NA
FBgn0000412	D1	3R	9238083	9240654	-	1877	9087.38	4841.44	5622.59	2995.52	-0.69227	0.400537	0.0839242	0.163042	6409.66	3414.84	-0.50422	0.40067	0.208233	0.298506	6686.23	3562.19	-0.442274	0.400501	0.269462	0.77029
FBgn0000414	Dab	3L	16712126	16724575	+	9270	435.317	46.9597	563.639	60.8025	0.362053	0.210643	0.0856513	0.165474	741.262	79.9635	0.741824	0.21235	0.000476914	0.0015045	461.267	49.7591	0.0725453	0.210711	0.73063	0.94581
FBgn0000416	Sap-r	3R	30883464	30889062	-	3527	5465.19	1549.53	3966.82	1124.7	-0.46329	0.163638	0.00463755	0.0150924	4195.17	1189.44	-0.384414	0.164157	0.019194	0.0398899	6482.95	1838.09	0.245292	0.163431	0.133384	0.676224
FBgn0000422	Ddc	2L	19116483	19120306	-	2797	335.435	119.927	449.626	160.753	0.409615	0.264882	0.122006	0.217608	477.4	170.683	0.504991	0.267468	0.0590201	0.104403	489.729	175.091	0.532832	0.264353	0.0438407	0.532902
FBgn0000426	SmF	2R	12183844	12184310	-	467	138.951	297.54	120.878	258.84	-0.170929	0.360126	0.635047	0.74094	112.941	241.844	-0.23939	0.367968	0.515322	0.6146	107.758	230.745	-0.336767	0.359775	0.349247	0.814457
FBgn0000427	44531	X	7867161	7873222	-	5748	16.6928	2.9041	466.727	81.1981	4.69144	0.397323	3.56529e-32	5.56738e-30	749.91	130.465	5.36727	0.398006	1.90667e-41	2.24269e-39	62.2833	10.8356	1.78725	0.40516	1.02792e-05	0.00575245
FBgn0000439	Dfd	3R	6791836	6802428	+	2739	0	0	0	0	0	4.40736	1	NA	1.92526	0.702908	2.82558	4.32256	0.513316	NA	0	0	0	4.40736	1	NA
FBgn0000442	Pkg21D	2L	786153	790798	-	2583	1.44626	0.559913	0	0	-3.22305	3.64002	0.375915	NA	0.25256	0.0977779	-1.48617	3.61631	0.6811	NA	0.241258	0.0934023	-2.50045	3.64002	0.492124	NA
FBgn0000447	Dhod	3R	8651391	8652916	-	1472	131.178	89.1154	92.9989	63.1786	-0.494533	0.174913	0.00469421	0.0152494	113.26	76.9427	-0.24346	0.181943	0.180859	0.266266	128.077	87.0091	-0.0314679	0.168255	0.851641	0.970041
FBgn0000448	Hr3	2R	10203995	10237348	-	10465	0	0	0	0	NA	NA	NA	NA	0	0	NA	NA	NA	NA	0	0	NA	NA	NA	NA
FBgn0000449	dib	3L	4062292	4064551	+	1975	0	0	0	0	0	4.40736	1	NA	0	0	0	4.40736	1	NA	0.241258	0.122156	-0.0223957	4.40736	0.995946	NA
FBgn0000451	ect	3L	10190276	10201837	-	3741	0	0	0	0	0	4.40736	1	NA	1.37275	0.366946	1.45465	4.36352	0.738858	NA	0.415169	0.110978	0.778079	4.37615	0.85888	NA
FBgn0000454	Dip-B	3R	13782288	13785676	+	2102	241.545	114.912	180.452	85.8477	-0.435244	0.149448	0.00358726	0.0120407	129.494	61.605	-0.917782	0.162862	1.74721e-08	1.19883e-07	200.518	95.3938	-0.281864	0.146967	0.0551269	0.56324
FBgn0000455	Dip-C	3R	12411809	12413759	-	1951	123.964	63.5387	227.065	116.384	0.898473	0.179415	5.50555e-07	5.26545e-06	321.581	164.829	1.41111	0.182163	9.4529e-15	1.41746e-13	161.83	82.9475	0.410264	0.18065	0.0231448	0.438527
FBgn0000459	disco	X	16210598	16216750	-	3247	66.1227	20.3642	38.4924	11.8548	-0.756764	0.520488	0.14596	0.250465	83.5916	25.7443	0.255078	0.521724	0.624902	0.712455	44.4914	13.7023	-0.553214	0.516783	0.284397	0.780803
FBgn0000463	Dl	3R	19302731	19326217	-	5278	5.32391	1.0087	1.91455	0.362742	-1.35977	1.28436	0.289731	0.421677	4.62336	0.875968	-0.642331	1.29793	0.62068	0.709248	4.7583	0.901535	-0.0274734	1.20644	0.981832	0.998902
FBgn0000464	Lar	2L	19586623	19732069	+	10337	66.0984	6.39435	72.7341	7.03629	0.137452	0.286265	0.631115	0.73774	122.685	11.8685	0.813652	0.289618	0.00496349	0.0123028	76.2301	7.37449	0.204581	0.283674	0.470798	0.859496
FBgn0000473	Cyp6a2	2R	6779749	6781491	-	1674	0	0	0	0	NA	NA	NA	NA	0	0	NA	NA	NA	NA	0	0	NA	NA	NA	NA
FBgn0000477	DNaseII	3R	18019375	18021161	+	1228	1.05151	0.856276	0	0	-2.77608	4.35561	0.523893	NA	0	0	-1.98309	4.35561	0.648897	NA	0	0	-3.01527	4.35561	0.488766	NA
FBgn0000479	dnc	X	3176440	3343767	+	16683	1174.77	70.4169	501.403	30.0548	-1.22711	0.673791	NA	NA	1562.73	93.6719	0.408971	0.673597	NA	NA	556.474	33.3558	-1.07661	0.673592	NA	NA
FBgn0000482	dor	X	1665052	1668451	+	3161	139.172	44.028	285.672	90.3739	1.06586	0.182949	5.67676e-09	7.9099e-08	497.232	157.302	1.84016	0.184216	1.70035e-23	5.70374e-22	126.462	40.007	-0.109275	0.187662	0.560366	0.896856
FBgn0000489	Pka-C3	3L	15925805	15954797	-	3091	1095.49	354.413	6309.09	2041.12	2.52726	0.580352	1.33254e-05	9.24812e-05	26797.7	8669.58	4.61358	0.580319	1.864e-15	3.03092e-14	456.095	147.556	-1.26273	0.581157	0.0297967	0.475532
FBgn0000490	dpp	2L	2428372	2459823	+	5214	7.08265	1.35839	17.5985	3.37524	1.4608	0.475311	0.00211659	0.00772047	66.2426	12.7048	3.37781	0.458267	1.69561e-13	2.17523e-12	2.89727	0.555671	-1.13663	0.595725	0.056393	0.563823
FBgn0000492	Dr	3R	29556386	29565244	+	2552	0	0	3.906	1.53057	3.99985	1.58204	0.0114622	0.0322781	5.38959	2.11191	4.32628	1.60524	0.00703686	0.016763	0	0	0	1.93625	1	1
FBgn0000499	dsh	X	11355881	11358724	+	2844	281.083	98.8335	348.109	122.401	0.319197	0.314673	0.310402	0.443145	459.693	161.636	0.694893	0.3166	0.0281737	0.0553513	215.748	75.8609	-0.370524	0.315576	0.240348	0.751808
FBgn0000500	Dsk	3R	4189692	4190260	-	569	0.730044	1.28303	0	0	-2.48212	4.3686	0.569918	NA	0	0	-1.68913	4.3686	0.699013	NA	0	0	-2.72132	4.3686	0.533333	NA
FBgn0000504	dsx	3R	7924323	7967408	-	9053	24.9209	2.75278	56.1185	6.19888	1.09996	0.364715	0.0025618	0.0090563	45.2168	4.99468	0.674606	0.384034	0.0789808	0.133557	44.5743	4.9237	0.759572	0.365628	0.0377603	0.508397
FBgn0000520	dwg	X	2727698	2730042	+	2002	83.7757	41.846	107.647	53.7697	0.36333	0.193678	0.0606624	0.125381	88.3379	44.1248	0.0352598	0.207825	0.865277	0.906828	80.7956	40.3574	-0.0453583	0.195287	0.816332	0.962683
FBgn0000524	dx	X	6533999	6538575	+	3828	455.419	118.971	892.384	233.12	0.961152	0.247359	0.000102052	0.000556126	928.849	242.646	1.02381	0.248872	3.892e-05	0.000152333	454.803	118.81	-0.0118775	0.248175	0.961828	0.993832
FBgn0000527	e	3R	21229839	21237177	-	3142	0	0	0.230361	0.0733167	0.216798	2.89382	0.94028	NA	1.90157	0.605209	2.6589	2.76144	0.335615	NA	0	0	0	2.89382	1	NA
FBgn0000529	bsh	2L	19765776	19769067	-	2012	0.730044	0.362845	0.252983	0.125737	-1.52034	4.3686	0.727829	NA	0	0	-1.68914	4.3686	0.699012	NA	0	0	-2.72132	4.3686	0.533332	NA
FBgn0000533	ea	3R	15328729	15330408	+	1527	0	0	0	0	0	4.40736	1	NA	0	0	0	4.40736	1	NA	0.448843	0.293938	0.876976	4.36772	0.840866	NA
FBgn0000535	eag	X	14955477	15009989	+	10636	1546.52	145.404	1216.95	114.418	-0.345272	0.475275	0.467551	0.59904	2902.33	272.878	0.904992	0.475274	0.0568907	0.101206	1445.24	135.882	-0.0972401	0.475135	0.83784	0.966983
FBgn0000536	eas	X	16278328	16285618	+	4627	35.1139	7.58891	19.6891	4.25527	-0.890584	0.377518	0.0183218	0.0475065	13.6304	2.94584	-1.16514	0.412121	0.00469614	0.0117205	46.5104	10.0519	0.358414	0.352702	0.309537	0.801757
FBgn0000541	E(bx)	3L	233926	246912	-	10072	2618.76	260.004	2448.66	243.115	-0.0982637	0.311231	0.75221	0.831434	1847.76	183.455	-0.504219	0.312001	0.106077	0.170322	2924.27	290.337	0.15766	0.311123	0.612335	0.911557
FBgn0000542	ec	X	3811698	3857621	+	8400	104.848	12.4819	385.453	45.8873	1.85303	0.419173	9.83928e-06	7.06136e-05	513.501	61.1311	2.27726	0.420437	6.08107e-08	3.85688e-07	123.653	14.7206	0.212713	0.421948	0.614175	0.912367
FBgn0000543	ecd	3L	2263581	2265857	-	2204	221.17	100.349	496.619	225.326	1.15655	0.187544	6.96646e-10	1.12469e-08	480.721	218.113	1.13877	0.191027	2.50175e-09	1.94159e-08	245.513	111.394	0.142107	0.189618	0.453593	0.853079
FBgn0000546	EcR	2R	6087873	6169087	-	9934	379.599	38.2121	839.715	84.5294	1.13706	0.250992	5.891e-06	4.48161e-05	1018.25	102.501	1.40109	0.252208	2.77166e-08	1.8458e-07	491.846	49.5114	0.365104	0.251566	0.14669	0.691759
FBgn0000547	ed	2L	4031377	4115749	+	6425	399.114	62.1188	347.818	54.135	-0.204367	0.266327	0.442871	0.57604	529.53	82.4172	0.373457	0.267883	0.163285	0.244685	615.363	95.7764	0.618963	0.264754	0.0193935	0.402953
FBgn0000551	Edg78E	3L	21296763	21297803	-	967	0.693401	0.717064	0.252983	0.261616	-1.49527	2.56108	0.559324	NA	0.528819	0.546866	-0.0319484	2.4638	0.989654	NA	0	0	-2.69626	2.56108	0.292439	NA
FBgn0000552	Edg84A	3R	6684445	6685157	+	652	0	0	0	0	NA	NA	NA	NA	0	0	NA	NA	NA	NA	0	0	NA	NA	NA	NA
FBgn0000557	eEF1alpha2	3R	31738468	31743306	+	2656	2.43831	0.918038	2.33872	0.880542	-0.158434	1.09448	0.884903	0.927397	5.11333	1.9252	0.827327	1.08186	0.444435	0.54846	2.30819	0.869047	-0.123988	1.07475	0.908156	0.983255
FBgn0000559	eEF2	2L	21677913	21682164	-	3056	37375.5	12230.2	16298.5	5333.28	-1.19729	0.279408	1.82667e-05	0.000122319	20603.3	6741.92	-0.859822	0.279462	0.00209299	0.00570112	28126.3	9203.64	-0.410095	0.279377	0.142134	0.686549
FBgn0000560	eg	3L	21808703	21817600	+	2033	41.9117	20.6157	28.1979	13.8701	-0.604702	0.380597	0.1121	0.203179	30.1512	14.8309	-0.724961	0.403579	0.072442	0.124263	60.3812	29.7005	0.500226	0.364589	0.170054	0.702081
FBgn0000562	egl	2R	23734904	23746829	-	4515	1156.69	256.187	1919.56	425.151	0.725083	0.178805	5.00991e-05	0.000298518	1797.6	398.14	0.631297	0.179983	0.000452269	0.00143274	1267.92	280.824	0.126853	0.179026	0.478589	0.86248
FBgn0000564	Eh	3R	17446642	17448858	-	704	0	0	0	0	NA	NA	NA	NA	0	0	NA	NA	NA	NA	0	0	NA	NA	NA	NA
FBgn0000565	MsrA	3L	15511052	15513202	+	1354	127.168	93.9199	136.406	100.743	0.115907	0.208252	0.57782	0.694608	100.892	74.5141	-0.219952	0.220578	0.318685	0.420932	112.045	82.7509	-0.167338	0.208512	0.422243	0.841601
FBgn0000566	Eip55E	2R	18627918	18629395	+	1478	143.655	97.1955	51.1189	34.5865	-1.51936	0.227363	2.34845e-11	4.63396e-10	32.3011	21.8546	-2.13037	0.25907	1.98204e-16	3.6937e-15	148.949	100.777	0.0319036	0.209752	0.879107	0.977392
FBgn0000567	Eip74EF	3L	17558672	17619325	-	9332	156.375	16.7568	367.623	39.3938	1.21528	0.415081	0.00341368	0.0115408	632.292	67.7552	1.98969	0.415749	1.7032e-06	8.57468e-06	266.567	28.5648	0.751105	0.415373	0.0705652	0.604584
FBgn0000568	Eip75B	3L	17950953	18064696	-	13451	2708.59	201.368	2343.44	174.22	-0.208846	0.374354	0.576924	0.693824	4336.84	322.418	0.676077	0.374444	0.0709885	0.122326	2150.07	159.845	-0.333111	0.374327	0.373524	0.821574
FBgn0000575	emc	3L	749400	753492	+	2049	2724.85	1329.84	3291.25	1606.27	0.272798	0.413431	0.509357	0.636135	5446.31	2658.03	0.997261	0.41352	0.0158809	0.0338909	2488.66	1214.57	-0.130452	0.413454	0.752368	0.94909
FBgn0000576	ems	3R	13901853	13904620	+	2478	0.328379	0.132518	0.483344	0.195054	0.0507443	3.26212	0.987589	NA	0.25256	0.101921	0.0295233	3.27651	0.992811	NA	0	0	-1.94596	3.30271	0.555726	NA
FBgn0000577	en	2R	11524006	11528210	-	2792	18.7972	6.73252	74.3787	26.6399	1.89191	0.31361	1.61263e-09	2.45885e-08	52.7743	18.902	1.51602	0.328452	3.91844e-06	1.85323e-05	27.7112	9.92521	0.467106	0.328241	0.15472	0.69272
FBgn0000578	ena	2R	19141632	19163705	+	6075	2255.81	371.327	2946.56	485.031	0.38449	0.162859	0.0182321	0.0473173	3488.53	574.243	0.621647	0.163425	0.000142452	0.000498526	1844.81	303.673	-0.29104	0.163058	0.0742799	0.616158
FBgn0000579	Eno	2L	1724768	1729636	-	3718	2605.34	700.737	818.469	220.137	-1.66844	0.173068	5.39797e-22	4.10836e-20	567.45	152.622	-2.19766	0.177198	2.53858e-35	2.10935e-33	1987.61	534.591	-0.387995	0.171785	0.0239075	0.44496
FBgn0000581	E(Pc)	2R	11452043	11465270	+	10946	1752.16	160.074	2032.58	185.692	0.212691	0.235527	0.366502	0.501612	2500.69	228.457	0.505293	0.236058	0.0323103	0.0623025	1731.82	158.215	-0.0184447	0.23552	0.937578	0.988714
FBgn0000588	esc	2L	11827204	11829405	-	1704	62.5174	36.6886	81.1403	47.6175	0.395985	0.222497	0.0751196	0.148908	63.1147	37.0391	-0.0891201	0.241689	0.712322	0.785236	63.9694	37.5407	0.0535892	0.223587	0.810579	0.96186
FBgn0000591	E(spl)m8-HLH	3R	26040240	26041008	+	769	0	0	0	0	0	4.40736	1	NA	0	0	0	4.40736	1	NA	0.241258	0.31373	-0.0223957	4.40736	0.995946	NA
FBgn0000592	Est-6	3L	12188818	12190705	+	1837	0	0	0	0	NA	NA	NA	NA	0	0	NA	NA	NA	NA	0	0	NA	NA	NA	NA
FBgn0000594	Est-P	3L	12190733	12192528	+	1740	0	0	0	0	0	4.40736	1	NA	0.25256	0.14515	0.992539	4.38784	0.821044	NA	0	0	0	4.40736	1	NA
FBgn0000606	eve	2R	9979319	9980795	+	1406	0	0	0.460722	0.327683	0.943451	4.38307	0.829573	NA	0	0	0	4.40736	1	NA	0	0	0	4.40736	1	NA
FBgn0000611	exd	X	15992468	15996509	+	3302	1674.55	507.131	1948.62	590.132	0.21563	0.151335	0.1542	0.261632	2144.2	649.365	0.359052	0.152346	0.0184325	0.0385105	1957.76	592.9	0.222202	0.151182	0.141626	0.686349
FBgn0000615	exu	2R	20667427	20671083	-	3290	22.3112	6.78153	10.5119	3.19511	-1.11779	0.474228	0.0184196	0.0476909	7.92374	2.40843	-1.31412	0.518444	0.0112531	0.0252401	24.7698	7.52881	0.142294	0.436573	0.744474	0.947894
FBgn0000617	e(y)1	X	17842161	17843348	+	1124	339.187	301.767	317.412	282.395	-0.0811979	0.282499	0.773785	0.845603	316.904	281.943	-0.0706426	0.286225	0.805057	0.859632	275.641	245.232	-0.284517	0.282404	0.313704	0.80303
FBgn0000618	e(y)2	X	11576118	11576620	-	503	35.817	71.2067	39.9761	79.4754	0.250121	0.417379	0.548995	0.67129	37.3301	74.2149	0.251283	0.432554	0.561289	0.65705	39.6442	78.8156	0.236839	0.414909	0.56812	0.900248
FBgn0000625	eyg	3L	12462537	12468021	-	3148	0	0	0	0	NA	NA	NA	NA	0	0	NA	NA	NA	NA	0	0	NA	NA	NA	NA
FBgn0000629	E(z)	3L	10634575	10638130	-	2665	339.295	127.315	299.027	112.205	-0.176653	0.171446	0.302835	0.43481	222.74	83.5798	-0.610482	0.180001	0.000694997	0.00211086	282.793	106.114	-0.253952	0.170846	0.137165	0.683077
FBgn0000633	CG17716	2R	13623044	13749367	+	5978	16.8725	2.82244	17.8994	2.99421	0.0929791	0.509051	0.855071	0.905669	36.6368	6.12861	0.943379	0.51149	0.0651288	0.113306	12.5524	2.09977	-0.40628	0.514937	0.430117	0.845491
FBgn0000635	Fas2	X	4132887	4206093	-	7306	24.5283	3.35728	103.206	14.1262	2.03629	0.308161	3.8983e-11	7.40187e-10	195.95	26.8204	2.92332	0.309281	3.3244e-21	9.4091e-20	23.5844	3.22809	-0.0942141	0.330748	0.775758	0.954154
FBgn0000636	Fas3	2L	18320102	18393441	+	6612	717.22	108.472	2328.6	352.178	1.7024	0.260199	6.0424e-11	1.11006e-09	4899.7	741.032	2.77246	0.260257	1.69204e-26	7.19473e-25	684.477	103.52	-0.0640528	0.261049	0.806173	0.960865
FBgn0000639	Fbp1	3L	14094589	14098053	-	3465	0	0	0	0	NA	NA	NA	NA	0	0	NA	NA	NA	NA	0	0	NA	NA	NA	NA
FBgn0000640	Fbp2	2L	9426784	9427917	+	1074	0	0	0	0	NA	NA	NA	NA	0	0	NA	NA	NA	NA	0	0	NA	NA	NA	NA
FBgn0000644	Fcp3C	X	3173376	3174474	-	963	0	0	0.568937	0.590797	1.1673	2.20774	0.596991	NA	0.505121	0.524528	1.65047	2.18413	0.44985	NA	1.12126	1.16434	2.19715	2.0706	0.288637	NA
FBgn0000658	fj	2R	18232761	18236311	+	3551	14.3748	4.04809	0.230361	0.0648722	-5.67178	1.3391	2.28041e-05	0.000148263	2.73034	0.768894	-2.67247	0.880926	0.00241568	0.00647302	7.61635	2.14485	-0.938319	0.683635	0.169894	0.702081
FBgn0000659	fkh	3R	28580976	28585264	-	4289	0.328379	0.0765631	2.49742	0.582285	2.40929	1.6996	0.15632	0.264139	1.53906	0.358839	2.01352	1.77806	0.257455	0.354912	1.06991	0.249455	1.19457	1.76013	0.497338	NA
FBgn0000662	fl(2)d	2R	13819624	13824553	-	2977	1187.33	398.834	967.181	324.885	-0.300009	0.229675	0.191473	0.307423	1000.1	335.942	-0.252692	0.231202	0.274417	0.372679	1625.59	546.05	0.448793	0.229051	0.0500708	0.553148
FBgn0000667	Actn	X	2023822	2042311	-	5272	1415.01	268.401	1829.52	347.026	0.368439	0.133184	0.00566798	0.017837	2081.83	394.885	0.555959	0.13431	3.48246e-05	0.000138094	1492.63	283.125	0.0750038	0.13322	0.573429	0.90181
FBgn0000709	fliI	X	21339741	21345088	+	4827	629.97	130.51	738.336	152.96	0.226974	0.239464	0.343211	0.47632	777.939	161.164	0.280272	0.241346	0.245525	0.341428	543.067	112.506	-0.215815	0.23969	0.36791	0.820131
FBgn0000711	flw	X	10385960	10409817	+	4276	674.682	157.783	1888.83	441.728	1.48942	0.149479	2.1888e-23	1.888e-21	2354.11	550.541	1.79881	0.150316	5.30051e-33	3.66463e-31	602.207	140.834	-0.159623	0.151079	0.290717	0.787355
FBgn0000715	FMRFa	2R	9906294	9910457	+	1427	2.16938	1.52024	0	0	-3.85528	4.30115	0.370073	NA	0	0	-3.06229	4.30115	0.476484	NA	0	0	-4.09447	4.30115	0.341123	NA
FBgn0000719	fog	X	22824317	22855194	-	6564	303.504	46.2377	429.38	65.4145	0.488234	0.161789	0.00254683	0.00901039	457.154	69.6457	0.559125	0.165642	0.000736789	0.00222585	293.41	44.6999	-0.0615958	0.162716	0.705024	0.937771
FBgn0000721	for	2L	3622074	3656953	-	6929	620.367	89.5319	980.598	141.521	0.652579	0.186126	0.000454699	0.00206427	1246.88	179.951	0.997323	0.187335	1.01658e-07	6.22108e-07	736.491	106.291	0.238941	0.18631	0.199669	0.725865
FBgn0000723	FER	3R	9367603	9394546	-	5128	259.749	50.6531	335.451	65.4155	0.347445	0.215459	0.106835	0.195791	551.009	107.451	1.06062	0.216818	9.99356e-07	5.23081e-06	349.105	68.0782	0.405045	0.214727	0.0592509	0.570108
FBgn0000808	gd	X	11985154	11987764	-	2261	42.8132	18.9355	27.9979	12.383	-0.644075	0.413813	0.119604	0.214242	51.6081	22.8254	0.129351	0.41753	0.756713	0.82167	29.3874	12.9975	-0.58892	0.409363	0.150256	0.69272
FBgn0000810	fs(1)K10	X	2242138	2246041	+	3052	401.4	131.52	378.167	123.908	-0.0767408	0.179656	0.669268	0.768063	459.68	150.616	0.169451	0.182869	0.354119	0.45818	340.252	111.485	-0.230655	0.179401	0.198549	0.725528
FBgn0000826	png	X	1356488	1357601	-	1114	6.25651	5.61625	12.4109	11.1409	0.99441	0.603995	0.0996837	0.186075	10.9152	9.7982	1.00184	0.629493	0.111497	0.177475	6.17049	5.53904	-0.0362978	0.630003	0.954055	0.991876
FBgn0000927	fs(1)Ya	X	2724286	2726577	+	2235	4.81025	2.15224	0.736327	0.329453	-2.72047	1.19422	0.0227246	0.0567457	0.78138	0.349611	-2.22605	1.17893	0.0589996	0.104403	2.75703	1.23357	-0.902754	0.94302	0.338415	0.811555
FBgn0000928	fs(1)Yb	X	2720468	2724158	+	3502	253.325	72.3373	156.141	44.5862	-0.702561	0.202563	0.000523649	0.00234169	107.549	30.7108	-1.22128	0.216397	1.66437e-08	1.1483e-07	244.064	69.6928	-0.0592252	0.198506	0.765433	0.953514
FBgn0000964	tj	2L	19464267	19467758	+	3492	2343.78	671.187	4802.62	1375.32	1.03258	0.19041	5.86267e-08	6.57156e-07	3780.99	1082.76	0.6861	0.191011	0.000328233	0.00107013	3145.87	900.879	0.422297	0.190496	0.026635	0.4609
FBgn0000996	dup	2R	15376619	15380988	-	3138	577.289	183.967	359.578	114.588	-0.68008	0.124685	4.91388e-08	5.67666e-07	268.425	85.5403	-1.05875	0.132858	1.59957e-15	2.62928e-14	533.772	170.1	-0.111677	0.122003	0.360002	0.817665
FBgn0001075	ft	2L	4198404	4221796	-	16852	24.7232	1.46708	22.447	1.33201	-0.201706	0.488976	0.679968	0.775618	35.5023	2.10671	0.360734	0.497172	0.468101	0.569914	26.3613	1.56428	0.01777	0.482065	0.970595	0.996721
FBgn0001077	ftz	3R	6864324	6866244	+	1774	0	0	0	0	0	4.40736	1	NA	2.74549	1.54763	3.39292	4.30487	0.430604	NA	0	0	0	4.40736	1	NA
FBgn0001078	ftz-f1	3L	18750607	18801309	-	8581	1697.79	197.855	3145.89	366.612	0.888332	0.259369	0.000614845	0.00268757	4565.14	532.006	1.42211	0.259584	4.29138e-08	2.78417e-07	2050.06	238.906	0.270528	0.259468	0.297121	0.792999
FBgn0001079	fu	X	18657755	18661204	+	3251	78.3536	24.1014	185.308	57.0002	1.2106	0.24703	9.55428e-07	8.68806e-06	186.03	57.2224	1.26607	0.252887	5.54329e-07	3.01173e-06	84.6691	26.044	0.0816305	0.252074	0.746063	0.947977
FBgn0001083	fw	X	11992915	12003914	-	4698	0	0	0.230361	0.0490339	0.216787	3.21087	0.94617	NA	0.276259	0.0588035	1.05176	3.17883	0.740748	NA	0.911994	0.194124	1.89763	3.07157	0.536704	NA
FBgn0001084	fy	2L	8401476	8403280	-	1688	27.6752	16.3953	51.9897	30.7996	0.862607	0.309742	0.00535399	0.0170264	72.7143	43.0772	1.36913	0.315029	1.38606e-05	5.9439e-05	26.5987	15.7575	-0.11468	0.320848	0.720772	0.942665
FBgn0001085	fz	3L	14274343	14368639	+	3817	97.1508	25.4521	218.999	57.3746	1.14702	0.254617	6.64074e-06	4.98303e-05	317.568	83.1983	1.6429	0.25729	1.70943e-10	1.54979e-09	205.345	53.7975	1.05263	0.254118	3.43872e-05	0.0102
FBgn0001086	fzy	2L	16310956	16313097	+	1996	904.206	453.009	1178.65	590.508	0.379502	0.285251	0.183382	0.297543	1061.05	531.586	0.238681	0.286543	0.404863	0.509072	1255.7	629.11	0.471054	0.285077	0.0984585	0.642855
FBgn0001087	g	X	13727204	13736278	-	4404	1788.4	406.086	770.826	175.029	-1.21157	0.245798	8.2597e-07	7.6257e-06	700.263	159.006	-1.36295	0.248039	3.90905e-08	2.55258e-07	1259.01	285.879	-0.503636	0.245088	0.0398868	0.520252
FBgn0001089	Gal	2L	6003574	6006827	-	2345	1.02178	0.435727	0	0	-2.89183	2.95512	0.327785	NA	0.25256	0.107702	-1.156	2.92575	0.69276	NA	0.207585	0.0885222	-2.16924	2.95512	0.462911	NA
FBgn0001090	bnb	X	18794246	18797687	-	2726	4.84689	1.77802	7.56012	2.77334	0.558474	0.760613	0.462801	0.595227	14.3686	5.27094	1.15762	0.771203	0.13334	0.206544	3.13853	1.15133	-0.729309	0.809376	0.367548	0.820131
FBgn0001091	Gapdh1	2R	7791901	7793380	-	1480	939.185	634.585	379.701	256.555	-1.30886	0.275444	2.01608e-06	1.7097e-05	250.296	169.119	-1.86075	0.281266	3.69978e-11	3.64623e-10	916.15	619.02	-0.0376773	0.273713	0.890515	0.979898
FBgn0001092	Gapdh2	X	15868145	15869661	+	1443	3899.06	2702.05	1338.09	927.3	-1.54339	0.127813	1.42478e-33	2.58085e-31	1014.41	702.985	-1.92847	0.13075	3.10847e-49	5.52027e-47	3409.61	2362.86	-0.193995	0.126724	0.125807	0.670486
FBgn0001098	Gdh	3R	23935958	23943101	-	2343	4253.34	1815.34	2810.63	1199.59	-0.598398	0.280826	0.0331016	0.0768722	1826.91	779.732	-1.21375	0.281738	1.64681e-05	6.95346e-05	4642.79	1981.56	0.125704	0.280654	0.654227	0.922167
FBgn0001099	gdl	3L	15509445	15511047	+	1175	0.328379	0.279472	1.21967	1.03802	1.39695	1.88097	0.457676	NA	0.78138	0.665004	1.16473	1.95393	0.551111	NA	0.448843	0.381994	-0.0883738	2.03436	0.96535	NA
FBgn0001104	Galphai	3L	6972750	6980044	-	2067	1256.89	608.076	2006.7	970.825	0.677589	0.247694	0.00622684	0.0193337	3806.97	1841.79	1.59755	0.247832	1.14774e-10	1.05749e-09	1186.99	574.256	-0.0798346	0.247929	0.747448	0.948136
FBgn0001105	Gbeta13F	X	15860115	15866175	+	5605	29256.8	5219.76	21510.2	3837.68	-0.443685	0.567552	0.434361	0.567514	36152.6	6450.07	0.305193	0.567562	0.590765	0.683341	14476.2	2582.73	-1.01502	0.567558	0.0737121	0.615461
FBgn0001108	DCTN1-p150	3L	13929387	13934656	+	4550	372.972	81.9718	528.776	116.214	0.514771	0.122036	2.46262e-05	0.000159087	494.634	108.711	0.422403	0.126567	0.00084567	0.00251949	332.588	73.0963	-0.153533	0.123483	0.213738	0.731336
FBgn0001112	Gld	3R	7252063	7265703	-	2899	0	0	0.460722	0.158925	0.95373	3.51151	0.785929	NA	1.3339	0.460123	2.6582	3.43861	0.439496	NA	0	0	0	3.54272	1	NA
FBgn0001114	Glt	2L	8672698	8676804	+	3373	2627.76	779.059	328.12	97.2785	-3.00022	0.195803	5.39714e-53	3.76014e-50	289.434	85.8091	-3.21348	0.201828	4.47042e-57	1.39616e-54	3090.83	916.345	0.236153	0.191837	0.218319	0.731421
FBgn0001120	gnu	3L	14802380	14803360	-	923	1.08815	1.17893	20.7	22.4268	4.59121	1.06298	1.56593e-05	0.000106556	20.6282	22.3491	4.53124	1.07337	2.4269e-05	9.8611e-05	1.84335	1.99713	1.07755	1.16695	0.355806	0.816395
FBgn0001122	Galphao	2R	10437985	10465701	+	6415	544.885	84.9393	783.59	122.15	0.527357	0.305158	0.0839626	0.163082	1753.95	273.413	1.68139	0.305225	3.61511e-08	2.37089e-07	403.781	62.9433	-0.429423	0.305891	0.160365	0.69823
FBgn0001123	Galphas	2R	23942538	23946936	+	2112	1697.9	803.929	1809.7	856.866	0.0916314	0.20788	0.659366	0.760458	1312.86	621.62	-0.358249	0.209461	0.0872041	0.145105	1773.85	839.892	0.0627727	0.207776	0.762563	0.952305
FBgn0001124	Got1	2R	16138352	16141928	+	1770	540.41	305.317	267.961	151.391	-1.00222	0.149987	2.35646e-11	4.63967e-10	235.739	133.186	-1.19581	0.157741	3.43326e-14	4.72569e-13	453.011	255.938	-0.244197	0.146501	0.0955417	0.641119
FBgn0001125	Got2	2L	1984512	1987758	-	1734	1136.07	655.175	877.299	505.94	-0.371913	0.174457	0.0330207	0.0768025	781.563	450.728	-0.518577	0.177084	0.00340684	0.00880933	1476.81	851.679	0.380389	0.173548	0.0283915	0.466967
FBgn0001128	Gpdh1	2L	5943643	5948968	+	3152	709.033	224.947	677.009	214.787	-0.0717803	0.174008	0.679965	0.775618	709.271	225.023	0.0170949	0.176517	0.922849	0.946478	1095.79	347.65	0.623003	0.172876	0.00031366	0.0457305
FBgn0001133	grau	2R	21009764	21011921	-	1894	152.102	80.3071	138.836	73.3031	-0.103275	0.252285	0.682277	0.777437	129.27	68.2525	-0.161451	0.260735	0.535775	0.633818	121.286	64.0367	-0.298886	0.25201	0.235619	0.748808
FBgn0001134	Grd	3L	17823333	17839767	+	4071	0	0	0.252983	0.0621427	0.216791	4.40736	0.960769	NA	0.25256	0.0620389	0.99253	4.38784	0.821046	NA	0	0	0	4.40736	1	NA
FBgn0001137	grk	2L	8431086	8433598	-	1718	49.835	29.0076	74.3637	43.285	0.58194	0.243216	0.0167257	0.0440234	95.2343	55.4332	0.889246	0.25005	0.000376151	0.00121282	50.7894	29.5631	0.0296615	0.24684	0.904353	0.982021
FBgn0001138	grn	3R	8147368	8181444	-	4090	0	0	0	0	0	4.40736	1	NA	0.25256	0.0617507	0.992539	4.38784	0.821044	NA	0	0	0	4.40736	1	NA
FBgn0001139	gro	3R	26041736	26049911	+	4455	4296.48	964.419	4513.29	1013.08	0.0713666	0.443195	0.872072	0.918236	8938.36	2006.37	1.05603	0.443223	0.0171903	0.0362282	3427.75	769.416	-0.325536	0.44321	0.462647	0.853554
FBgn0001142	Gs1	2L	132077	134472	+	2396	1540.8	643.071	1430.32	596.962	-0.108178	0.162338	0.505169	0.632038	1259.75	525.772	-0.276242	0.164169	0.0924383	0.151944	2055.72	857.979	0.415003	0.161843	0.0103403	0.310461
FBgn0001145	Gs2	X	11422832	11430197	+	2231	96.5701	43.2856	217.107	97.3139	1.1643	0.343709	0.000705406	0.00304377	684.75	306.925	2.80303	0.342767	2.89408e-16	5.28883e-15	73.0737	32.7538	-0.407184	0.349239	0.243648	0.754596
FBgn0001147	gsb-n	2R	25040383	25052331	-	2237	0	0	0.230361	0.102978	0.2168	4.40736	0.960767	NA	0	0	0	4.40736	1	NA	0	0	0	4.40736	1	NA
FBgn0001148	gsb	2R	25061964	25064643	+	1649	0	0	0.252983	0.153416	0.2168	4.40736	0.960767	NA	0	0	0	4.40736	1	NA	0	0	0	4.40736	1	NA
FBgn0001149	GstD1	3R	12367817	12369268	-	843	482.017	571.788	291.098	345.312	-0.714268	0.162786	1.14511e-05	8.08987e-05	375.204	445.082	-0.365826	0.166283	0.0278052	0.0547222	497.773	590.478	0.059852	0.1598	0.708	0.938704
FBgn0001150	gt	X	2427113	2428967	-	1780	8.71556	4.89638	19.8505	11.152	1.04549	0.530409	0.0487114	0.104919	19.4544	10.9295	1.18897	0.547394	0.0298513	0.0582428	16.1347	9.06446	0.755239	0.53127	0.15515	0.69272
FBgn0001168	h	3L	8675759	8679253	+	2335	10346.5	4431.05	3157.26	1352.15	-1.71224	0.540366	0.00153136	0.0058894	6092.33	2609.14	-0.76536	0.540404	0.156696	0.236453	5613.28	2403.97	-0.882073	0.540281	0.102549	0.651772
FBgn0001169	H	3R	20621938	20628915	+	6004	864.14	143.927	1570.94	261.65	0.85856	0.200587	1.86695e-05	0.000124789	2637.83	439.345	1.60039	0.200938	1.65735e-15	2.71439e-14	757.104	126.1	-0.194889	0.201242	0.33283	0.807512
FBgn0001170	H2.0	2L	6013059	6019402	-	1662	0	0	0.230361	0.138605	0.2168	4.40736	0.960767	NA	0	0	0	4.40736	1	NA	0	0	0	4.40736	1	NA
FBgn0001174	halo	2L	1517533	1518148	-	616	0.723128	1.17391	0.776676	1.26084	0.710743	2.20788	0.74752	NA	1.58646	2.57542	1.9733	2.17155	0.363506	NA	0	0	-1.94598	2.35676	0.408975	NA
FBgn0001179	hay	3L	10631079	10633969	+	2628	450.881	171.568	362.551	137.957	-0.300259	0.190994	0.115932	0.208871	345.781	131.576	-0.347957	0.195657	0.0753376	0.128451	334.001	127.093	-0.419344	0.190654	0.027842	0.465942
FBgn0001180	hb	3R	8690980	8697822	-	3835	5.83895	1.52254	2.54266	0.663015	-1.33715	0.812952	0.10001	0.186415	8.00999	2.08865	0.28489	0.754691	0.705808	0.781098	3.44713	0.898861	-0.942462	0.765293	0.218134	0.731421
FBgn0001185	her	2L	16677185	16679691	+	2378	796.031	334.748	626.504	263.458	-0.345216	0.11209	0.00207135	0.00758295	408.104	171.616	-0.91666	0.118985	1.31894e-14	1.93922e-13	760.117	319.645	-0.0660727	0.110882	0.551252	0.894693
FBgn0001186	Hex-A	X	9585675	9589813	+	4139	8733.08	2109.95	4746.11	1146.68	-0.879523	0.483666	0.0689953	0.138926	7324.27	1769.57	-0.254788	0.483732	0.598393	0.690137	5921.63	1430.69	-0.560255	0.483627	0.246683	0.755471
FBgn0001187	Hex-C	2R	15218837	15220329	-	1493	0	0	0	0	NA	NA	NA	NA	0	0	NA	NA	NA	NA	0	0	NA	NA	NA	NA
FBgn0001189	hfw	X	1669570	1673608	+	3038	270.09	88.9038	226.322	74.497	-0.265983	0.156673	0.089564	0.171388	196.643	64.7279	-0.484294	0.165305	0.00339301	0.00878264	258.613	85.126	-0.0751507	0.15463	0.626965	0.916892
FBgn0001197	His2Av	3R	26866929	26869220	+	1224	3895.07	3182.25	1945.9	1589.79	-1.00054	0.258009	0.000105356	0.000571381	1639.92	1339.8	-1.25556	0.258998	1.24849e-06	6.42476e-06	3536.12	2888.99	-0.138639	0.257712	0.590605	0.903907
FBgn0001202	hook	2L	19030844	19033498	-	2317	254.698	109.926	500.185	215.876	0.95251	0.177824	8.48629e-08	9.23802e-07	573.591	247.558	1.16523	0.180509	1.08038e-10	9.98474e-10	261.587	112.899	0.0173248	0.179714	0.923201	0.986506
FBgn0001206	Hmr	X	10590920	10595855	-	4696	191.857	40.8554	434.996	92.6311	1.16029	0.314869	0.00022872	0.00113757	524.131	111.612	1.42397	0.316715	6.92216e-06	3.13001e-05	202.495	43.1208	0.0567449	0.3165	0.857711	0.972813
FBgn0001208	Hn	3L	7760453	7763166	+	2115	0	0	0	0	0	4.40736	1	NA	0	0	0	4.40736	1	NA	0.223579	0.105711	-0.0223957	4.40736	0.995946	NA
FBgn0001215	Hrb98DE	3R	28599834	28605777	+	2743	13509.4	4925.04	10870.4	3962.97	-0.31298	0.105442	0.00299487	0.0103249	9032.39	3292.89	-0.580885	0.10588	4.10582e-08	2.67336e-07	12214	4452.78	-0.144833	0.105381	0.169327	0.702081
FBgn0001216	Hsc70-1	3L	13974061	13977761	+	2718	0.730044	0.268596	0.631908	0.23249	-0.404969	3.67618	0.912282	NA	0.552518	0.203281	-0.0222865	3.67695	0.995164	NA	0	0	-2.72459	3.74223	0.466573	NA
FBgn0001217	Hsc70-2	3R	13044759	13047388	+	2174	0	0	9.30204	4.27877	5.23375	1.33049	8.36457e-05	0.000467065	7.48117	3.4412	4.90343	1.35686	0.000301746	0.000993788	0.706095	0.324791	1.47047	1.54835	0.342263	0.813782
FBgn0001218	Hsc70-3	X	11801696	11807117	-	3589	12230.3	3407.73	6166.55	1718.18	-0.987761	0.466989	0.0344155	0.0792931	12793	3564.51	0.0643556	0.467003	0.890394	0.923282	6643.28	1851.01	-0.880317	0.466968	0.059406	0.570961
FBgn0001220	Hsc70-5	2R	14252598	14256192	-	2922	1952.53	668.217	1180.41	403.972	-0.727983	0.177779	4.22394e-05	0.000256753	731.861	250.466	-1.39626	0.181091	1.25558e-14	1.86071e-13	1794.57	614.159	-0.123158	0.177188	0.487012	0.86314
FBgn0001222	Hsf	2R	18130303	18134634	-	2910	551.588	189.549	842.162	289.403	0.608048	0.235594	0.00985387	0.0284406	1286.5	442.097	1.2055	0.236338	3.38323e-07	1.89381e-06	623.442	214.241	0.17409	0.235785	0.460306	0.853554
FBgn0001223	Hsp22	3L	9372931	9374964	+	1900	0	0	0	0	NA	NA	NA	NA	0	0	NA	NA	NA	NA	0	0	NA	NA	NA	NA
FBgn0001224	Hsp23	3L	9381882	9382765	+	884	129.262	146.224	444.82	503.19	1.76735	0.227263	7.44607e-15	2.40854e-13	562.597	636.422	2.1293	0.229276	1.58646e-20	4.21366e-19	166.62	188.485	0.350751	0.230656	0.128343	0.670486
FBgn0001225	Hsp26	3L	9376418	9377427	-	1010	9.29212	9.20012	7.97036	7.89145	-0.316554	0.635645	0.618481	0.727762	9.85756	9.75996	0.173567	0.649642	0.789335	0.847416	7.07911	7.00902	-0.490489	0.633131	0.438514	0.849106
FBgn0001226	Hsp27	3L	9384063	9385694	+	1632	11886.8	7283.59	17002.2	10418	0.516599	0.447199	0.248014	0.37419	29896.4	18318.9	1.33062	0.447212	0.00292638	0.00771144	7941.68	4866.23	-0.581595	0.447228	0.193449	0.721617
FBgn0001227	Hsp67Ba	3L	9377802	9379534	-	1733	38.7178	22.3415	47.2445	27.2617	0.324373	0.288323	0.260574	0.388673	36.3155	20.9553	-0.199287	0.314727	0.526599	0.625414	65.7846	37.96	0.808033	0.280187	0.00392772	0.200072
FBgn0001228	CG4456	3L	9372722	9374964	+	2109	0	0	0.230361	0.109228	0.216777	4.14586	0.958299	NA	0	0	0	4.14586	1	NA	0.87832	0.416463	1.84846	4.04116	0.647377	NA
FBgn0001229	Hsp67Bc	3L	9371511	9372497	-	987	0.693401	0.702534	1.80634	1.83013	1.13869	1.45232	0.433011	0.566486	2.45408	2.48641	1.27402	1.50285	0.396584	0.500817	1.0859	1.10021	0.418018	1.49291	0.779475	NA
FBgn0001230	Hsp68	3R	24055080	24057310	-	2231	101.486	45.4891	152.867	68.5193	0.573586	0.357196	0.108318	0.197829	220.457	98.8152	1.05239	0.360239	0.00348502	0.00897976	62.9966	28.237	-0.704352	0.362446	0.0519765	0.558877
FBgn0001233	Hsp83	3L	3192969	3197059	+	2960	15576.5	5262.33	18117.7	6120.85	0.218118	0.159732	0.172088	0.284132	17399.3	5878.14	0.158823	0.159873	0.3205	0.422898	11824.3	3994.71	-0.397494	0.15976	0.0128439	0.34935
FBgn0001234	lncRNA:Hsromega	3R	21296127	21317836	+	21710	1122.73	51.7148	543.012	25.012	-1.04968	0.521182	0.0440062	0.0966216	963.679	44.3887	-0.229284	0.521513	0.66019	0.743884	1516.43	69.8495	0.431944	0.520497	0.406614	0.835549
FBgn0001235	hth	3R	10507561	10639568	-	11839	0.723128	0.0610802	7.12202	0.601573	3.91306	1.42806	0.00614152	0.0190992	24.9255	2.10537	5.55377	1.41954	9.13904e-05	0.000332954	0.447157	0.0377698	-0.0896646	1.73287	0.958733	0.993369
FBgn0001247	Ide	3L	20371672	20375896	-	3439	1353.53	393.583	820.473	238.579	-0.724278	0.202559	0.000349386	0.00164812	555.009	161.387	-1.25929	0.206223	1.01865e-09	8.36434e-09	1286.61	374.122	-0.0748445	0.201785	0.710703	0.938704
FBgn0001248	Idh	3L	8356404	8360906	-	2434	372.416	153.006	192.771	79.1995	-0.950046	0.206083	4.02626e-06	3.20438e-05	142.183	58.4154	-1.3113	0.216285	1.33741e-09	1.07958e-08	335.27	137.745	-0.148526	0.202447	0.463159	0.854063
FBgn0001250	if	X	16752189	16783434	-	6011	0.693401	0.115355	0.776676	0.129209	-0.0733594	1.6616	0.964785	0.979932	2.40669	0.40038	1.27854	1.58929	0.421124	0.525651	0.688415	0.114526	-0.275998	1.65653	0.867676	NA
FBgn0001253	ImpE1	3L	8372405	8391171	+	6264	1.44626	0.230884	2.62826	0.419581	1.50634	1.292	0.243659	0.369033	4.3168	0.689144	2.23523	1.29583	0.0845382	0.141501	1.08759	0.173626	0.259286	1.37139	0.850039	0.970041
FBgn0001254	ImpE2	3L	3510974	3512681	-	1708	0	0	0.315954	0.184985	0.216791	4.40736	0.960769	NA	0	0	0	4.40736	1	NA	0.241258	0.141252	-0.022405	4.40736	0.995944	NA
FBgn0001255	ImpE3	3R	8028453	8029546	-	1094	5.2852	4.83108	1.85158	1.69249	-1.60898	0.90896	0.0767059	0.151533	1.56276	1.42848	-1.44169	0.966454	0.135769	0.209804	2.20717	2.01752	-1.33757	0.858962	0.119423	0.669389
FBgn0001256	ImpL1	3L	13382765	13383999	+	1235	0	0	0	0	NA	NA	NA	NA	0	0	NA	NA	NA	NA	0	0	NA	NA	NA	NA
FBgn0001257	ImpL2	3L	4224006	4236147	-	2667	2338.99	877.012	1919.96	719.893	-0.28543	0.244642	0.24332	0.368706	2384.85	894.208	0.0203146	0.245173	0.933964	0.954202	1975.04	740.546	-0.244703	0.244534	0.316978	0.805768
FBgn0001258	Ldh	3L	6259105	6262694	-	1942	2698.13	1389.35	2007.77	1033.87	-0.428624	0.140522	0.00228667	0.00824786	1361.35	701.002	-0.982257	0.142751	5.94691e-12	6.41968e-11	2094.33	1078.44	-0.367538	0.140332	0.00881719	0.295291
FBgn0001259	in	3L	20367198	20370259	+	3062	0	0	0	0	NA	NA	NA	NA	0	0	NA	NA	NA	NA	0	0	NA	NA	NA	NA
FBgn0001263	inaD	2R	22855688	22858794	-	2331	0	0	0	0	NA	NA	NA	NA	0	0	NA	NA	NA	NA	0	0	NA	NA	NA	NA
FBgn0001269	inv	2R	11474465	11509695	+	5919	0	0	0.230361	0.0389189	0.2168	4.40736	0.960767	NA	0	0	0	4.40736	1	NA	0	0	0	4.40736	1	NA
FBgn0001276	ix	2R	11359437	11360163	-	727	77.2751	106.293	149.078	205.059	0.996766	0.204118	1.04334e-06	9.37456e-06	209.764	288.534	1.52047	0.2073	2.22313e-13	2.80821e-12	71.3369	98.1251	-0.0675526	0.210938	0.74878	0.948602
FBgn0001280	janA	3R	30038622	30039533	-	740	500.236	675.995	170.95	231.014	-1.54473	0.352248	1.15803e-05	8.16209e-05	130.176	175.914	-1.8735	0.360113	1.96586e-07	1.15316e-06	479.894	648.506	-0.054123	0.349008	0.876761	0.976623
FBgn0001281	janB	3R	30037984	30038728	-	569	1.09507	1.92455	0	0	-2.93949	4.34797	0.499001	NA	0	0	-2.14651	4.34797	0.621532	NA	0.482516	0.848008	-1.22365	4.30017	0.775983	NA
FBgn0001285	Jon44E	2R	8691448	8692844	+	1397	0	0	0	0	NA	NA	NA	NA	0	0	NA	NA	NA	NA	0	0	NA	NA	NA	NA
FBgn0001291	Jra	2R	10096480	10098556	+	1642	290.012	176.621	635.282	386.895	1.12987	0.172409	5.62289e-11	1.03932e-09	1069.03	651.052	1.86283	0.173293	5.95316e-27	2.63014e-25	269.592	164.185	-0.106687	0.174879	0.54182	0.891143
FBgn0001296	kar	3R	12682186	12689367	-	2678	24.8698	9.28671	13.7328	5.12802	-0.933734	0.503967	0.0639158	0.130497	19.5076	7.28438	-0.509466	0.517879	0.325236	0.427713	30.9585	11.5603	0.245183	0.478283	0.608209	0.909407
FBgn0001297	kay	3R	29765995	29794113	+	7789	2401.55	308.325	5250.42	674.081	1.12861	0.30267	0.000192351	0.000982029	7648.02	981.9	1.66921	0.30278	3.52902e-08	2.32284e-07	2138.61	274.568	-0.16717	0.302856	0.580963	0.903723
FBgn0001301	kel	2L	18129884	18138083	-	5476	982.87	179.487	1139.54	208.097	0.206726	0.17242	0.230539	0.354445	1335.75	243.928	0.433902	0.173749	0.0125148	0.0276319	945.366	172.638	-0.0631348	0.172441	0.714272	0.940899
FBgn0001308	Khc	2R	16266960	16271971	-	3718	2158.03	580.428	2446.69	658.066	0.183194	0.0953529	0.0547035	0.115194	2117.63	569.562	-0.0212713	0.0971421	0.826673	0.876103	1755.77	472.236	-0.295193	0.095558	0.00200733	0.139427
FBgn0001311	kkv	3R	5378093	5392866	-	5701	0	0	4.01911	0.704984	4.01867	1.29214	0.00187035	0.00693356	35.5602	6.23754	7.20301	1.24932	8.1399e-09	5.86034e-08	0.241258	0.0423186	-0.0224024	1.70843	0.989538	0.999184
FBgn0001313	kl-2	Y	573088	664173	+	13386	0	0	0	0	0	4.40736	1	NA	0	0	0	4.40736	1	NA	0.241258	0.0180232	-0.0223957	4.40736	0.995946	NA
FBgn0001316	klar	3L	434083	540614	-	11717	3432.22	292.926	5661.74	483.207	0.721208	0.177746	4.95986e-05	0.000296316	7535.18	643.098	1.13172	0.17796	2.02574e-10	1.80582e-09	3170.57	270.595	-0.115474	0.177885	0.516242	0.879603
FBgn0001319	kn	2R	14772650	14807061	-	4391	1.41653	0.322598	0.230361	0.0524621	-2.22988	1.92878	0.247636	NA	0	0	-2.39868	1.92878	0.213637	NA	1.08759	0.247686	-0.278968	1.66049	0.866581	NA
FBgn0001320	kni	3L	20692330	20695378	-	2215	0	0	0	0	NA	NA	NA	NA	0	0	NA	NA	NA	NA	0	0	NA	NA	NA	NA
FBgn0001321	knk	3R	10122365	10125664	-	2674	5.60666	2.09673	3.0347	1.13489	-0.944404	0.939454	0.314767	0.448035	3.16437	1.18338	-0.961692	1.00311	0.337706	0.441294	5.03155	1.88166	-0.194366	0.889185	0.826971	0.963903
FBgn0001323	knrl	3L	20597141	20620659	-	3909	0.723128	0.184991	0	0	-1.70673	4.40736	0.698575	NA	0	0	-0.913739	4.40736	0.835759	NA	0	0	-1.94592	4.40736	0.658839	NA
FBgn0001324	kto	3L	19836614	19844944	+	7776	1708.24	219.682	3232.23	415.668	0.919277	0.166641	3.4581e-08	4.13738e-07	4604.66	592.164	1.42519	0.166977	1.39821e-17	2.96572e-16	1238.46	159.267	-0.464859	0.167256	0.00544705	0.229684
FBgn0001325	Kr	2R	25226611	25231394	+	4411	0.693401	0.157198	0.230361	0.0522242	-1.49494	2.57194	0.561071	NA	0	0	-1.66374	2.57194	0.517708	NA	1.18861	0.269465	0.55712	2.37138	0.814259	NA
FBgn0001330	kz	X	2237858	2242035	-	3927	90.5217	23.0511	91.2062	23.2254	-0.0299829	0.256314	0.906878	0.942992	72.8647	18.5548	-0.325986	0.270821	0.228707	0.321546	78.6667	20.0323	-0.241839	0.256043	0.344901	0.813782
FBgn0001341	Mybbp1A	X	629773	633633	+	3680	502.962	136.674	219.192	59.5629	-1.19782	0.172812	4.16815e-12	9.09662e-11	127.756	34.7162	-2.01187	0.188018	1.01355e-26	4.41332e-25	381.038	103.543	-0.395647	0.168991	0.0192204	0.401295
FBgn0001404	egh	X	2588503	2599111	+	4662	2017.72	432.801	1528.96	327.962	-0.399113	0.461591	0.387232	0.522194	2109.52	452.492	0.060993	0.461875	0.894941	0.92584	1229.96	263.826	-0.713014	0.461609	0.122436	0.670486
FBgn0001491	l(1)10Bb	X	11324294	11325308	-	934	39.8668	42.6839	75.0711	80.3759	0.870456	0.291417	0.00281749	0.00980329	90.3227	96.7053	1.1961	0.29817	6.03429e-05	0.00022829	59.7636	63.9867	0.549677	0.2921	0.0598613	0.573415
FBgn0001565	Hlc	X	21385518	21387946	-	2116	661.984	312.847	767.8	362.854	0.216804	0.178547	0.224646	0.347857	853.854	403.523	0.345986	0.180642	0.0554519	0.0990392	601.825	284.416	-0.135129	0.178697	0.449535	0.851991
FBgn0001612	Grip91	X	13736570	13744683	-	3571	147.5	41.305	99.7461	27.9323	-0.550845	0.238688	0.0210102	0.0532129	83.824	23.4735	-0.844349	0.252825	0.0008388	0.00250403	102.315	28.6515	-0.517556	0.236647	0.0287398	0.470895
FBgn0001624	dlg1	X	11369665	11409776	+	11505	3731.7	324.354	3749.32	325.886	0.00739353	0.237725	0.975189	0.985735	5004.64	434.997	0.42052	0.237966	0.0772047	0.130969	3040.45	264.272	-0.295025	0.237737	0.214616	0.731421
FBgn0001941	ifc	2L	5986348	5988854	+	2201	1833.01	832.81	2148.81	976.29	0.227514	0.19163	0.235126	0.359597	1719.02	781.017	-0.0862722	0.19289	0.654686	0.739062	2351.71	1068.47	0.357419	0.191475	0.0619486	0.57806
FBgn0001942	eIF4A	2L	5981764	5985909	+	2480	34293.9	13828.2	11101.2	4476.29	-1.62718	0.578546	0.00491519	0.0158311	28436.1	11466.2	-0.270457	0.578543	0.640157	0.725986	20862.8	8412.4	-0.716968	0.578522	0.215231	0.731421
FBgn0001961	Arpc1	2L	13827941	13829741	-	1732	1421.05	820.47	1032.17	595.943	-0.458529	0.291425	0.115625	0.208485	1275.56	736.469	-0.160071	0.292256	0.583892	0.677146	814.484	470.256	-0.79997	0.291486	0.00606106	0.249461
FBgn0001965	Sos	2L	13813816	13819824	+	5635	889.58	157.867	1893.22	335.975	1.08328	0.218465	7.09943e-07	6.64938e-06	2554.12	453.26	1.51578	0.218958	4.43157e-12	4.85329e-11	1146.98	203.545	0.360155	0.218725	0.0996379	0.642975
FBgn0001967	NimC3	2L	14019357	14020208	-	852	0.730044	0.856859	2.01897	2.36968	1.29329	1.61945	0.424522	0.558365	6.02835	7.07553	2.62502	1.60239	0.101383	0.164203	0.723774	0.849501	-0.258904	1.73811	0.881587	0.978078
FBgn0001970	Pgant35A	2L	14359252	14361411	+	2160	44.6424	20.6678	55.2269	25.568	0.29752	0.251597	0.236998	0.36185	61.2648	28.3633	0.51168	0.260858	0.0498172	0.0903292	41.318	19.1287	-0.118289	0.254126	0.641592	0.919141
FBgn0001977	CIAPIN1	2L	15036293	15038861	-	2358	378.431	160.488	487.307	206.661	0.372211	0.166575	0.0254509	0.0621484	598.743	253.92	0.642381	0.169225	0.000147034	0.000512186	500.693	212.338	0.412791	0.165956	0.0128699	0.34935
FBgn0001978	stc	2L	15113480	15118069	+	4145	1508.91	364.031	1050.85	253.522	-0.519844	0.243904	0.0330607	0.0768559	930.576	224.506	-0.711283	0.245664	0.00378735	0.0096789	1307.83	315.52	-0.204201	0.243553	0.401793	0.833268
FBgn0001981	esg	2L	15333866	15336138	+	2273	10.5407	4.63734	21.9524	9.65789	0.924559	0.480411	0.0542899	0.114536	22.8534	10.0543	0.894127	0.501076	0.0743567	0.12709	8.40965	3.6998	-0.472231	0.511379	0.355775	0.816395
FBgn0001983	wor	2L	15423297	15425580	-	2222	3.59975	1.62005	9.79772	4.40941	1.51348	0.938212	0.106712	0.195609	15.1353	6.81154	2.05852	0.949915	0.0302302	0.0588427	2.2762	1.02439	-0.622294	1.0153	0.539933	0.890135
FBgn0001986	Mtr4	2L	15752263	15755900	+	3585	303.025	84.5257	316.664	88.3303	0.0540864	0.139774	0.698788	0.790361	298.633	83.3008	9.40059e-05	0.145675	0.999485	0.999595	294.824	82.2381	-0.04773	0.139181	0.731648	0.946312
FBgn0001987	Gli	2L	15756002	15762758	-	4468	342.839	76.7321	574.979	128.688	0.732471	0.264736	0.00566099	0.0178223	969.265	216.935	1.48908	0.265412	2.01821e-08	1.36818e-07	457.495	102.394	0.402767	0.264841	0.128313	0.670486
FBgn0001989	ND-B17	2L	15749319	15751078	-	992	469.537	473.324	522.086	526.297	0.160507	0.215702	0.456809	0.589606	637.838	642.982	0.46343	0.217717	0.0332883	0.0639296	556.139	560.624	0.252868	0.215184	0.239946	0.751808
FBgn0001990	wek	2L	15766133	15768349	-	2033	143.056	70.3671	158.265	77.8479	0.145205	0.228263	0.524693	0.649289	122.077	60.0478	-0.12173	0.23829	0.609458	0.699501	164.047	80.6923	0.196467	0.226833	0.38642	0.826511
FBgn0001991	Ca-alpha1D	2L	16165831	16190540	+	10481	1604.7	153.106	1695.82	161.8	0.077185	0.314348	0.806038	0.8696	1867.81	178.209	0.216566	0.31494	0.491678	0.591935	1972.69	188.216	0.29527	0.314204	0.347352	0.814457
FBgn0001992	Cyp303a1	2L	16294183	16296969	+	2787	0.365022	0.130973	0.230361	0.0826556	-0.74495	4.40736	0.865778	NA	0	0	-0.913748	4.40736	0.835757	NA	0	0	-1.94593	4.40736	0.658837	NA
FBgn0001994	crp	2L	16263556	16287730	-	4402	6967	1582.69	5935.67	1348.4	-0.230852	0.435902	0.596392	0.709699	8812.05	2001.83	0.338034	0.435967	0.438123	0.542235	4617.45	1048.94	-0.593169	0.435911	0.17359	0.704569
FBgn0001995	mRpL4	2L	16328059	16329132	-	1012	99.3976	98.219	64.6436	63.8771	-0.602427	0.23942	0.0118631	0.0331822	72.9742	72.1089	-0.425047	0.249509	0.0884684	0.146858	81.623	80.6552	-0.254622	0.233321	0.275143	0.777253
FBgn0002021	l(2)37Bb	2L	19049843	19051612	-	1708	421.844	246.982	219.386	128.446	-0.930069	0.208881	8.48224e-06	6.20547e-05	196.549	115.076	-1.09333	0.216375	4.35026e-07	2.40246e-06	426.067	249.454	0.0284509	0.205432	0.889851	0.979727
FBgn0002022	Catsup	2L	19041862	19043614	+	1698	1240.7	730.684	441.766	260.168	-1.48541	0.156808	2.7241e-21	1.91257e-19	453.698	267.195	-1.47096	0.160997	6.44879e-20	1.65458e-18	1094.23	644.424	-0.176733	0.154149	0.251584	0.760143
FBgn0002023	Lim3	2L	19079256	19108427	-	4281	0	0	0.230361	0.0538101	0.216785	4.40736	0.96077	NA	0.505121	0.117991	1.63683	4.35574	0.707075	NA	0	0	0	4.40736	1	NA
FBgn0002031	l(2)37Cc	2L	19121345	19123869	-	2119	3593.28	1695.74	1677.61	791.7	-1.09963	0.238407	3.98059e-06	3.17637e-05	1330.49	627.886	-1.42432	0.23973	2.82703e-09	2.18841e-08	3880.37	1831.23	0.11021	0.237966	0.643268	0.919258
FBgn0002036	CG10561	2L	19114401	19116570	+	2052	31.4519	15.3274	30.4517	14.84	-0.0117167	0.317956	0.970605	0.982668	65.3811	31.8621	1.04261	0.314564	0.00091823	0.00271335	26.8682	13.0937	-0.202037	0.316979	0.523875	0.882903
FBgn0002044	swm	2L	19493251	19497978	+	4249	2084.48	490.581	1954.82	460.065	-0.0915148	0.249561	0.71384	0.80238	2610.53	614.387	0.319311	0.249998	0.201513	0.290992	1442.86	339.577	-0.529696	0.24964	0.0338514	0.49438
FBgn0002069	AspRS	2R	12877004	12883168	+	2266	953.676	420.863	542.791	239.537	-0.814228	0.178449	5.04726e-06	3.9205e-05	413.091	182.3	-1.16917	0.183304	1.79035e-10	1.61025e-09	819.672	361.726	-0.219652	0.17718	0.215082	0.731421
FBgn0002121	l(2)gl	2L	9839	21376	-	5986	658.612	110.025	1119.29	186.985	0.759573	0.239542	0.00151947	0.00585112	898.938	150.173	0.454915	0.241439	0.05954	0.105097	773.069	129.146	0.225387	0.239768	0.347207	0.814457
FBgn0002174	CG5504	2R	23706913	23709026	+	2070	823.049	397.608	447.425	216.147	-0.872989	0.261791	0.00085396	0.00359736	341.58	165.015	-1.25207	0.266225	2.5628e-06	1.24926e-05	663.413	320.49	-0.304349	0.260765	0.243155	0.753838
FBgn0002183	dre4	3L	1871574	1876312	-	3690	3703.7	1003.71	4099.27	1110.91	0.148844	0.107058	0.164435	0.274726	3486.76	944.92	-0.087804	0.108118	0.416726	0.520951	3020.5	818.565	-0.29165	0.107148	0.0064899	0.256083
FBgn0002283	l(3)73Ah	3L	16588475	16590132	+	1404	84.9579	60.5113	131.034	93.3294	0.623813	0.171874	0.000284	0.00137892	131.121	93.3907	0.62971	0.180036	0.000469296	0.0014815	92.6843	66.0145	0.12039	0.17428	0.489701	0.865148
FBgn0002284	Prosbeta6	3L	16609400	16610418	-	944	1107.57	1173.27	876.068	928.038	-0.331325	0.159104	0.0373022	0.0845883	1058.38	1121.17	-0.0652204	0.160801	0.68504	0.764466	992.33	1051.2	-0.151649	0.158593	0.338964	0.811967
FBgn0002306	sas	3R	7162808	7183702	+	6236	0	0	0.546315	0.0876067	1.13641	2.44337	0.641861	NA	1.05764	0.169602	2.44281	2.36825	0.302316	NA	0.241258	0.038688	-0.0224008	2.51625	0.992897	NA
FBgn0002354	l(3)87Df	3R	13030913	13031598	+	551	27.7036	50.2787	19.1115	34.6851	-0.428459	0.39174	0.274071	0.403686	25.7738	46.7763	-0.0400305	0.403223	0.920919	0.945343	17.483	31.7295	-0.558696	0.38901	0.150945	0.69272
FBgn0002413	dco	3R	31054085	31061210	-	4783	2944.56	615.631	2760.58	577.164	-0.0912912	0.25655	0.721959	0.808555	2203.59	460.713	-0.419923	0.257313	0.102688	0.165898	2293.39	479.487	-0.358825	0.256555	0.161925	0.699586
FBgn0002431	hyd	3R	9714623	9725615	-	9083	1897.14	208.867	2230.65	245.585	0.231998	0.355353	0.513842	0.639882	2116.57	233.025	0.157187	0.355873	0.65871	0.742587	1847.54	203.406	-0.0400205	0.355358	0.910332	0.9845
FBgn0002440	l(3)mbn	3L	6123934	6128807	-	2321	0	0	0	0	NA	NA	NA	NA	0	0	NA	NA	NA	NA	0	0	NA	NA	NA	NA
FBgn0002441	l(3)mbt	3R	27266326	27273273	-	5398	588.534	109.028	527.559	97.7323	-0.158158	0.282232	0.575219	0.69251	788.9	146.147	0.401498	0.283291	0.156405	0.236172	450.616	83.4784	-0.385619	0.282205	0.171797	0.702892
FBgn0002466	sti	3L	12507998	12514815	-	6084	2189.08	359.809	2009.89	330.357	-0.12498	0.184297	0.49768	0.625941	921.942	151.535	-1.23613	0.187177	3.99922e-11	3.90732e-10	1860.23	305.757	-0.236746	0.184229	0.198772	0.725528
FBgn0002521	pho	4	1172469	1181628	-	2381	613.404	257.625	820.903	344.772	0.414812	0.158595	0.00890843	0.0262813	780.346	327.739	0.351066	0.161309	0.0295289	0.0576634	677.084	284.37	0.136385	0.15864	0.389945	0.827139
FBgn0002522	lab	3R	6661427	6678590	-	3046	0	0	0	0	NA	NA	NA	NA	0	0	NA	NA	NA	NA	0	0	NA	NA	NA	NA
FBgn0002524	lace	2L	15499127	15505018	+	2991	785.444	262.602	598.035	199.945	-0.398618	0.223408	0.0743808	0.147864	495.955	165.816	-0.647861	0.226803	0.00428347	0.0107795	778.275	260.206	-0.0186717	0.222674	0.933174	0.988567
FBgn0002525	Lam	2L	5542480	5546642	+	3737	12412.4	3321.49	16054.6	4296.12	0.371613	0.0830545	7.66517e-06	5.6626e-05	14583.3	3902.41	0.232109	0.0833814	0.00537415	0.0132122	10930.4	2924.92	-0.182992	0.0831035	0.0276671	0.465857
FBgn0002526	LanA	3L	6203831	6218022	-	11690	10699.2	915.24	4261.84	364.572	-1.32831	0.255992	2.11565e-07	2.1725e-06	2924.76	250.194	-1.87207	0.256611	2.9786e-13	3.70177e-12	7538.45	644.863	-0.505615	0.255859	0.0481383	0.549914
FBgn0002531	Lcp1	2R	8430115	8431243	-	1065	0	0	0	0	0	4.40736	1	NA	0	0	0	4.40736	1	NA	0.241258	0.226533	-0.0223957	4.40736	0.995946	NA
FBgn0002533	Lcp2	2R	8433797	8434785	-	927	0	0	0	0	NA	NA	NA	NA	0	0	NA	NA	NA	NA	0	0	NA	NA	NA	NA
FBgn0002534	Lcp3	2R	8435310	8436095	+	730	0.328379	0.449834	0	0	-1.70676	3.97513	0.667662	NA	0	0	-0.91377	3.97513	0.818192	NA	0.929673	1.27353	0.962805	3.86228	0.803141	NA
FBgn0002535	Lcp4	2R	8437647	8438495	+	792	0	0	0	0	NA	NA	NA	NA	0	0	NA	NA	NA	NA	0	0	NA	NA	NA	NA
FBgn0002542	lds	3R	7920431	7924491	+	3543	535.048	151.016	463.285	130.761	-0.207813	0.157735	0.187677	0.30267	293.451	82.8256	-0.82975	0.165336	5.20601e-07	2.83699e-06	512.866	144.755	-0.0620416	0.15683	0.692402	0.933939
FBgn0002543	robo2	2L	1380086	1420453	-	6206	38.8415	6.2587	108.542	17.4899	1.42279	0.339165	2.72913e-05	0.000173702	197.636	31.846	2.24355	0.340912	4.67161e-11	4.52038e-10	43.5138	7.01156	0.101063	0.347357	0.771091	0.953774
FBgn0002552	lin	2R	8914524	8918234	+	3654	297.097	81.3074	512.174	140.168	0.788827	0.177684	9.01704e-06	6.5649e-05	692.062	189.398	1.19466	0.179668	2.94498e-11	2.92785e-10	259.593	71.0435	-0.192229	0.179686	0.284707	0.781063
FBgn0002561	l(1)sc	X	409721	410817	+	1097	0	0	0	0	NA	NA	NA	NA	0	0	NA	NA	NA	NA	0	0	NA	NA	NA	NA
FBgn0002562	Lsp1alpha	X	12490291	12492982	+	2625	0	0	0	0	NA	NA	NA	NA	0	0	NA	NA	NA	NA	0	0	NA	NA	NA	NA
FBgn0002563	Lsp1beta	2L	898500	901316	+	2749	0	0	0	0	0	4.40736	1	NA	0.25256	0.0918735	0.99253	4.38784	0.821046	NA	0.223579	0.0813309	-0.0224048	4.40736	0.995944	NA
FBgn0002564	Lsp1gamma	3L	66430	68995	+	2501	4.87662	1.94987	5.19354	2.07659	0.0671675	0.676735	0.920938	0.950967	3.67804	1.47063	-0.0470373	0.726807	0.948399	0.964262	5.81053	2.32328	0.22188	0.657958	0.735947	0.946501
FBgn0002565	Lsp2	3L	12129393	12131869	+	2477	0	0	0	0	NA	NA	NA	NA	0	0	NA	NA	NA	NA	0	0	NA	NA	NA	NA
FBgn0002566	lt	2L	22924795	22943135	+	5368	1021.1	190.219	636.069	118.493	-0.684329	0.408794	0.0941273	0.178185	347.757	64.7833	-1.5317	0.412148	0.000202099	0.000688643	1161.23	216.324	0.183906	0.408219	0.652343	0.922096
FBgn0002567	Rab32	2R	9177864	9186342	-	4081	11.2589	2.75887	2.69123	0.659453	-2.00005	0.684169	0.00346321	0.0116734	10.5503	2.58523	-0.239563	0.601497	0.690425	0.768582	10.0383	2.45977	-0.0711881	0.553927	0.897741	0.981141
FBgn0002569	Mal-A2	2R	8453627	8455782	+	2036	1.3868	0.681141	0	0	-3.31683	2.81326	0.238398	NA	0.25256	0.124047	-1.58119	2.78237	0.569838	NA	0.723774	0.355488	-1.02457	2.67956	0.702191	NA
FBgn0002570	Mal-A1	2R	8449664	8451904	-	1826	0	0	0	0	NA	NA	NA	NA	0	0	NA	NA	NA	NA	0	0	NA	NA	NA	NA
FBgn0002571	Mal-A3	2R	8455909	8457892	-	1795	0	0	0	0	0	4.40736	1	NA	0.276259	0.153905	1.0622	4.3837	0.808543	NA	0	0	0	4.40736	1	NA
FBgn0002573	sens	3L	13396228	13401125	-	2451	0	0	0	0	NA	NA	NA	NA	0	0	NA	NA	NA	NA	0	0	NA	NA	NA	NA
FBgn0002576	lz	X	9284649	9303636	+	3468	0	0	12.1308	3.49792	5.65039	1.34075	2.50504e-05	0.000161137	23.0135	6.63597	6.63567	1.34143	7.54726e-07	4.00912e-06	3.82526	1.10302	3.96516	1.3692	0.00377977	0.196374
FBgn0002577	m	X	11754273	11769508	+	3405	3.25753	0.956692	0.568937	0.167089	-2.42629	1.88887	0.198961	0.31675	0.505121	0.148347	-1.93879	1.86003	0.297253	0.398081	0.654742	0.192288	-2.15417	1.80778	0.233414	NA
FBgn0002578	Kaz-m1	3R	26014721	26016487	+	1705	0	0	0	0	0	4.40736	1	NA	0	0	0	4.40736	1	NA	0.207585	0.12175	-0.0223957	4.40736	0.995946	NA
FBgn0002579	RpL36	X	628338	629483	-	686	3276.56	4776.32	787.472	1147.92	-2.05634	0.6634	0.00193716	0.00713785	1783.25	2599.48	-0.880536	0.663427	0.184425	0.270324	1563.29	2278.85	-1.06701	0.663094	0.107585	0.657747
FBgn0002590	RpS5a	X	17143588	17148264	-	1386	10740.3	7749.16	3406.63	2457.89	-1.65642	0.423016	9.01334e-05	0.000498375	5020.4	3622.22	-1.09882	0.423134	0.00940776	0.0215602	7469.98	5389.6	-0.523626	0.422898	0.215647	0.731421
FBgn0002592	E(spl)m2-BFM	3R	26016514	26017470	-	957	24.9313	26.0516	8.00691	8.36668	-1.64311	0.55224	0.00292652	0.0101398	4.59348	4.79988	-2.06569	0.618743	0.00084226	0.0025118	42.0875	43.9785	0.741468	0.497672	0.136258	0.681736
FBgn0002593	RpLP1	2L	419952	420864	+	768	2538.51	3305.35	717.178	933.826	-1.82304	0.419364	1.37925e-05	9.51397e-05	1210.91	1576.71	-1.07456	0.419737	0.010465	0.023671	2141.6	2788.54	-0.244665	0.418702	0.55899	0.896719
FBgn0002609	E(spl)m3-HLH	3R	26021823	26023127	+	1305	19.4118	14.8749	9.46564	7.25336	-1.08357	0.468921	0.0208448	0.0528532	21.5261	16.4951	-0.176663	0.463371	0.703013	0.778956	35.4683	27.1788	0.825344	0.418157	0.0484085	0.551678
FBgn0002622	RpS3	3R	23358812	23360207	+	1133	16708.9	14747.5	5856.07	5168.64	-1.51248	0.385581	8.7596e-05	0.000486722	8222.34	7257.14	-1.02417	0.385666	0.00791738	0.0186157	13232.5	11679.2	-0.336383	0.385504	0.382892	0.824028
FBgn0002626	RpL32	3R	30045229	30046161	-	796	5777.6	7258.29	1903.96	2391.91	-1.60104	0.502768	0.00145033	0.00563279	2687.2	3375.88	-1.10656	0.502967	0.027802	0.0547222	3755.55	4718.03	-0.620991	0.502602	0.216625	0.731421
FBgn0002629	E(spl)m4-BFM	3R	26023821	26024579	-	759	0.656758	0.865294	1.09263	1.43957	0.410569	1.65484	0.804055	0.868052	0.805078	1.06071	0.43673	1.70908	0.798309	0.854445	1.82567	2.40537	1.17341	1.57512	0.456292	NA
FBgn0002631	E(spl)m5-HLH	3R	26028854	26029735	-	882	0	0	0.736327	0.834838	1.61299	2.88069	0.575526	0.692788	2.74549	3.1128	3.22471	2.8425	0.256601	0.353842	0.207585	0.235357	-0.0224137	2.99103	0.994021	NA
FBgn0002632	E(spl)m6-BFM	3R	26032911	26034047	+	1137	0	0	0	0	0	4.40736	1	NA	0.25256	0.222129	0.992539	4.38784	0.821044	NA	0	0	0	4.40736	1	NA
FBgn0002633	E(spl)m7-HLH	3R	26037038	26038019	+	982	2.10993	2.14861	2.81337	2.86494	0.430148	1.24368	0.729443	0.814921	1.51536	1.54314	-0.111743	1.3488	0.933974	0.954202	1.74402	1.77599	-0.256245	1.27152	0.840286	0.966995
FBgn0002638	Rcc1	3L	5930262	5932773	-	2365	927.914	392.353	932.4	394.25	0.0120016	0.229328	0.958263	0.975715	676.607	286.092	-0.464404	0.232106	0.0454114	0.0835278	828.152	350.17	-0.158662	0.229259	0.488897	0.864759
FBgn0002641	mal	X	20429675	20433210	+	3209	89.2476	27.8116	77.054	24.0118	-0.226066	0.219362	0.302746	0.434751	93.262	29.0626	0.00960711	0.227482	0.966313	0.976884	78.1781	24.3622	-0.213679	0.216718	0.324143	0.805768
FBgn0002643	mam	2R	13991203	14060356	+	8869	2250.06	253.699	6488.73	731.62	1.52603	0.223297	8.25306e-12	1.73832e-10	13015	1467.47	2.52929	0.223332	9.84167e-30	5.571e-28	3079.52	347.223	0.450783	0.223445	0.0436511	0.531851
FBgn0002645	Map205	3R	32055279	32068441	-	6046	2687.53	444.513	4107.4	679.358	0.610972	0.135155	6.16817e-06	4.67491e-05	4129.82	683.066	0.621575	0.135806	4.71846e-06	2.19831e-05	2183.87	361.209	-0.30065	0.135445	0.0264381	0.45851
FBgn0002673	twe	2L	16259414	16261877	-	2379	83.4273	35.0682	137.007	57.59	0.674322	0.325748	0.0384453	0.0867461	104.06	43.7412	0.284463	0.336199	0.397489	0.501821	90.4539	38.0218	0.0758344	0.327449	0.816855	0.962683
FBgn0002707	mei-9	X	4314230	4318801	-	3606	107.855	29.9098	46.9281	13.0139	-1.2134	0.232751	1.85484e-07	1.91554e-06	28.6794	7.95324	-1.81569	0.26528	7.67933e-12	8.16334e-11	97.3973	27.0098	-0.168044	0.217487	0.439721	0.849614
FBgn0002709	mei-218	X	17135985	17142990	-	6310	5.50365	0.872211	6.79214	1.07641	0.165533	0.613191	0.787196	0.854937	5.5796	0.884248	-0.00673297	0.66052	0.991867	0.994532	7.95204	1.26023	0.398197	0.594567	0.503032	0.874922
FBgn0002715	mei-S332	2R	22122101	22124566	+	1703	317.652	186.525	568.065	333.567	0.831693	0.15348	5.99639e-08	6.68834e-07	445.339	261.503	0.494458	0.158466	0.00180675	0.00499998	388.761	228.28	0.286692	0.154206	0.0630057	0.579033
FBgn0002716	mei-W68	2R	19456170	19459523	+	2300	13.5853	5.90664	31.0154	13.4849	1.1045	0.363409	0.00237152	0.00849923	30.6047	13.3064	1.16056	0.377753	0.00212446	0.00577295	13.9116	6.04851	-0.0534451	0.384498	0.88945	0.979727
FBgn0002719	Men	3R	12713103	12722442	-	3074	2447.54	796.205	1022.75	332.711	-1.25696	0.219348	1.00175e-08	1.35618e-07	1971.54	641.359	-0.316563	0.219616	0.149461	0.227317	763.092	248.241	-1.67974	0.219506	1.97354e-14	1.69764e-10
FBgn0002723	Met	X	11616124	11621280	+	5088	453.809	89.192	413.355	81.2411	-0.131681	0.655996	0.840907	0.896164	1312.06	257.874	1.52953	0.655741	0.0196734	0.0407367	276.707	54.3842	-0.710638	0.656259	0.27887	0.777794
FBgn0002732	E(spl)malpha-BFM	3R	26010893	26011568	+	676	0.656758	0.971536	0.252983	0.374235	-1.42225	3.88022	0.713964	NA	0	0	-1.59104	3.88022	0.681777	NA	0.622754	0.921233	-0.277297	3.79626	0.941771	NA
FBgn0002733	E(spl)mbeta-HLH	3R	26005046	26006023	-	978	62.4877	63.8933	15.4359	15.7831	-2.05066	0.351383	5.34738e-09	7.47395e-08	13.7706	14.0804	-2.31142	0.392855	4.01353e-09	3.048e-08	70.5614	72.1487	0.142122	0.307378	0.643816	0.919258
FBgn0002734	E(spl)mdelta-HLH	3R	25997621	25998633	+	1013	10.2406	10.1092	13.2269	13.0571	0.243561	0.508194	0.631747	0.738289	10.0542	9.92514	-0.0699024	0.548663	0.89862	0.928345	19.8425	19.5879	0.831266	0.489891	0.0897273	0.638734
FBgn0002735	E(spl)mgamma-HLH	3R	25999851	26000761	+	911	121.813	133.714	67.9999	74.6431	-0.827731	0.577556	0.151812	0.258402	111.467	122.357	-0.182731	0.580728	0.753021	0.818545	95.5431	104.877	-0.336848	0.57472	0.557803	0.896719
FBgn0002736	mago	2R	21128577	21129737	+	1103	651.935	591.056	641.382	581.488	-0.0231668	0.158695	0.883934	0.926704	478.89	434.17	-0.409859	0.163393	0.0121269	0.0268803	694.264	629.432	0.0923029	0.158087	0.559306	0.896719
FBgn0002772	Mlc1	3R	27657078	27660177	-	1414	0.656758	0.464468	0.230361	0.162915	-1.45048	2.62019	0.579866	NA	0.25256	0.178614	-0.677224	2.58691	0.793484	NA	0.448843	0.317428	-0.792136	2.55305	0.756355	NA
FBgn0002773	Mlc2	3R	30171438	30174551	-	2286	15.3945	6.73424	11.6321	5.0884	-0.527636	0.540922	0.329342	0.462888	20.3609	8.90678	0.350836	0.541615	0.517141	0.616363	15.9625	6.98273	-0.0565963	0.523361	0.913885	0.9845
FBgn0002774	mle	2R	5974857	5980778	-	4641	778.413	167.725	529.38	114.066	-0.561838	0.147248	0.000135863	0.000713754	370.542	79.8411	-1.06029	0.153639	5.15584e-12	5.61256e-11	861.695	185.67	0.140343	0.145527	0.334857	0.807978
FBgn0002775	msl-3	3L	7123213	7125533	-	1970	198.775	100.901	354.038	179.715	0.809637	0.22032	0.000238012	0.00117797	241.721	122.701	0.289369	0.2273	0.202994	0.292711	229.202	116.346	0.182747	0.221384	0.409101	0.83637
FBgn0002778	mnd	3L	14985100	14991667	+	2546	164.613	64.6556	41.042	16.1202	-2.0137	0.338064	2.57604e-09	3.81229e-08	59.5361	23.3842	-1.66395	0.348008	1.74109e-06	8.73633e-06	168.397	66.1416	0.0238819	0.321852	0.94085	0.988714
FBgn0002780	mod	3R	32052060	32054974	+	2287	4096.29	1791.12	1387.84	606.841	-1.56035	0.18964	1.90373e-16	7.49656e-15	551.759	241.259	-2.88624	0.194337	6.78316e-50	1.2287e-47	3055.35	1335.97	-0.42168	0.188988	0.0256645	0.455046
FBgn0002781	mod(mdg4)	3R	21350846	21377401	-	16924	1514.25	89.4737	1951.67	115.32	0.367815	0.122274	0.00262879	0.00924978	1868.14	110.384	0.316763	0.1238	0.0105073	0.0237317	1518.45	89.7218	0.00577359	0.122369	0.962368	0.993938
FBgn0002783	mor	3R	15968134	15972913	-	3983	1753.08	440.14	1488.97	373.832	-0.231869	0.102743	0.0240214	0.059362	1307.45	328.256	-0.412143	0.105266	9.03061e-05	0.000329534	1468.01	368.569	-0.253261	0.10248	0.0134612	0.353029
FBgn0002787	Rpn8	2R	24400028	24404527	+	1532	1421.62	927.948	1486.79	970.49	0.0685352	0.232715	0.768374	0.842792	1644.86	1073.67	0.214125	0.233602	0.359341	0.463282	1207.41	788.125	-0.231426	0.232744	0.320058	0.805768
FBgn0002789	Mp20	2R	13246670	13248880	+	948	1.78155	1.87927	1.39086	1.46715	-0.346714	1.25405	0.782183	0.851372	6.27474	6.61892	2.10818	1.14336	0.065206	0.113419	0.896	0.945147	-0.935689	1.29807	0.471012	0.859674
FBgn0002791	mr	2R	23972431	23975408	+	2555	240.963	94.3106	210.06	82.2152	-0.196746	0.215378	0.360983	0.495668	147.284	57.6453	-0.616653	0.225194	0.00617538	0.0149188	220.576	86.3312	-0.124486	0.21416	0.561056	0.896856
FBgn0002838	ms(3)K81	3R	26875852	26876562	+	711	0	0	0.252983	0.355813	0.2168	4.40736	0.960767	NA	0	0	0	4.40736	1	NA	0	0	0	4.40736	1	NA
FBgn0002842	sa	3L	21405425	21406738	-	956	0	0	0	0	NA	NA	NA	NA	0	0	NA	NA	NA	NA	0	0	NA	NA	NA	NA
FBgn0002855	Acp26Aa	2L	5892883	5893896	-	958	0	0	0	0	NA	NA	NA	NA	0	0	NA	NA	NA	NA	0	0	NA	NA	NA	NA
FBgn0002856	Acp26Ab	2L	5892298	5892862	-	504	0	0	0	0	NA	NA	NA	NA	0	0	NA	NA	NA	NA	0	0	NA	NA	NA	NA
FBgn0002862	Mst87F	3R	13827151	13828008	-	623	0	0	0	0	NA	NA	NA	NA	0	0	NA	NA	NA	NA	0	0	NA	NA	NA	NA
FBgn0002863	Acp95EF	3R	24228975	24229279	+	243	0	0	0	0	NA	NA	NA	NA	0	0	NA	NA	NA	NA	0	0	NA	NA	NA	NA
FBgn0002865	Mst98Ca	3R	28291338	28292656	+	1319	0	0	0	0	0	4.40736	1	NA	0.25256	0.191479	0.992539	4.38784	0.821044	NA	0	0	0	4.40736	1	NA
FBgn0002868	MtnA	3R	9783407	9784370	-	700	1158.38	1654.83	219.474	313.535	-2.39719	0.603006	7.02623e-05	0.00040124	158.651	226.645	-2.88421	0.607669	2.07115e-06	1.02786e-05	791.735	1131.05	-0.547297	0.601399	0.362801	0.818901
FBgn0002869	MtnB	3R	20503102	20503746	-	584	0	0	0	0	0	4.40736	1	NA	0	0	0	4.40736	1	NA	0.431163	0.738293	0.826131	4.37198	0.850124	NA
FBgn0002872	mu2	3L	1942734	1947475	-	4117	441.132	107.149	674.724	163.887	0.603779	0.292732	0.0391537	0.0879284	456.364	110.849	0.0503631	0.296003	0.864897	0.906545	536.694	130.36	0.273455	0.292813	0.350361	0.814457
FBgn0002873	mud	X	14247732	14258595	+	8895	1509.08	169.655	1519.97	170.879	0.00759846	0.278366	0.978223	0.987271	701.517	78.8665	-1.10131	0.280957	8.8602e-05	0.000324361	2032.11	228.456	0.426416	0.278123	0.125229	0.670486
FBgn0002878	mus101	X	13722246	13727113	+	4868	74.8064	15.367	73.4987	15.0983	-0.075833	0.294582	0.79685	0.862071	42.3704	8.70386	-0.860615	0.319835	0.00712791	0.0169487	73.638	15.127	-0.073283	0.29256	0.802209	0.960152
FBgn0002887	mus201	2L	8438169	8442342	+	3950	243.626	61.6774	231.745	58.6696	-0.0668563	0.143855	0.642113	0.746428	126.253	31.9628	-0.90352	0.159559	1.49077e-08	1.03622e-07	244.214	61.8262	0.00719964	0.14221	0.959623	0.993523
FBgn0002891	DNApol-zeta	2R	7793625	7801044	+	6750	255.369	37.8325	132.882	19.6863	-0.952477	0.355782	0.00742539	0.0224472	103.902	15.3929	-1.37546	0.366358	0.000173736	0.000599209	235.522	34.8922	-0.128489	0.352701	0.715633	0.941341
FBgn0002899	mus301	3L	8137808	8142014	+	3364	77.5047	23.0394	30.6375	9.10748	-1.36175	0.355675	0.000128847	0.000680449	17.4506	5.18746	-1.93331	0.39218	8.2381e-07	4.35566e-06	78.9465	23.4681	-0.0003705	0.3383	0.999126	1
FBgn0002901	mus304	3L	18109814	18112847	+	2816	28.8422	10.2422	29.9846	10.6479	-0.000631532	0.367589	0.998629	0.999733	21.0964	7.49162	-0.303322	0.394335	0.441775	0.546009	34.0805	12.1025	0.191365	0.360992	0.596036	0.905523
FBgn0002905	DNApol-theta	3R	12705523	12712299	-	6420	263.264	41.0068	175.599	27.3519	-0.600938	0.256268	0.0190291	0.0490039	132.357	20.6164	-1.02627	0.266617	0.000118488	0.000422	241.733	37.6532	-0.140988	0.253875	0.57866	0.902999
FBgn0002906	Blm	3R	11736810	11741783	-	4806	180.481	37.5532	122.321	25.4516	-0.577435	0.264168	0.0288255	0.0686311	75.4808	15.7055	-1.16802	0.279781	2.98288e-05	0.000119645	168.623	35.0859	-0.116008	0.260831	0.65649	0.922219
FBgn0002909	mus312	3L	7329132	7333471	+	4022	0	0	0	0	NA	NA	NA	NA	0	0	NA	NA	NA	NA	0	0	NA	NA	NA	NA
FBgn0002914	Myb	X	15854832	15857823	-	2928	0	0	0	0	NA	NA	NA	NA	0	0	NA	NA	NA	NA	0	0	NA	NA	NA	NA
FBgn0002917	na	X	14266367	14277416	+	7875	2.03664	0.258622	1.34561	0.170872	-0.627719	1.3935	0.652376	0.755089	1.08134	0.137313	-0.553579	1.45414	0.703432	0.779311	1.15325	0.146445	-0.851065	1.39175	0.540864	NA
FBgn0002921	Atpalpha	3R	20948714	20976239	+	6680	9271.16	1387.9	9863.27	1476.54	0.0894245	0.277743	0.747477	0.828124	17314.4	2591.97	0.900343	0.277779	0.00119019	0.0034297	7568.43	1133	-0.292631	0.277753	0.292081	0.787859
FBgn0002922	nau	3R	23712814	23718357	-	1532	0	0	0	0	0	4.40736	1	NA	0.25256	0.164857	0.992539	4.38784	0.821044	NA	0	0	0	4.40736	1	NA
FBgn0002924	ncd	3R	29804290	29807127	-	2720	852.593	313.453	948.824	348.832	0.158937	0.191036	0.405424	0.539354	701.775	258.006	-0.270229	0.194078	0.163808	0.245266	774.086	284.59	-0.134395	0.191084	0.48185	0.86314
FBgn0002926	ndl	3L	6593938	6603366	-	8230	0	0	0	0	0	4.40736	1	NA	0.276259	0.0335673	1.0622	4.3837	0.808543	NA	0	0	0	4.40736	1	NA
FBgn0002930	nec	2R	7156477	7158241	-	1633	0.723128	0.442822	6.77331	4.14777	3.81017	1.30299	0.00345374	0.0116458	18.5926	11.3855	5.25735	1.29313	4.79088e-05	0.0001848	1.3962	0.854988	1.50873	1.39964	0.28106	0.780023
FBgn0002931	net	2L	82421	87387	-	2225	61.6201	27.6944	40.7845	18.3301	-0.633257	0.355657	0.0749895	0.148715	35.7744	16.0784	-0.738572	0.373922	0.0482451	0.0878304	73.1067	32.8569	0.206681	0.345468	0.549663	0.893631
FBgn0002932	neur	3R	9020348	9039471	-	4309	178.927	41.5241	216.826	50.3194	0.250824	0.205883	0.223116	0.345962	198.343	46.0298	0.129724	0.213027	0.542552	0.639914	186.843	43.3611	0.0350814	0.205752	0.864614	0.974468
FBgn0002933	ng1	X	3242412	3242934	+	523	0	0	0	0	NA	NA	NA	NA	0	0	NA	NA	NA	NA	0	0	NA	NA	NA	NA
FBgn0002936	ninaA	2L	877302	878270	+	871	0	0	0	0	0	4.40736	1	NA	0	0	0	4.40736	1	NA	0.931359	1.0693	1.92764	4.30573	0.654375	NA
FBgn0002937	ninaB	3R	13700565	13703164	+	2164	0	0	0.230361	0.106452	0.21677	4.03007	0.957104	NA	0.505121	0.23342	1.63759	3.97326	0.680227	NA	0.670736	0.309952	1.45785	3.94323	0.711599	NA
FBgn0002938	ninaC	2L	7377702	7384344	+	5425	0	0	1.36824	0.252209	2.46628	1.90332	0.195052	NA	2.17782	0.401442	2.83732	1.93782	0.143144	NA	0	0	0	2.14513	1	NA
FBgn0002939	ninaD	2L	18081628	18083608	+	1788	0	0	0.230361	0.128837	0.216791	4.40736	0.960769	NA	0.25256	0.141253	0.99253	4.38784	0.821046	NA	0	0	0	4.40736	1	NA
FBgn0002940	ninaE	3R	19886255	19888206	-	1588	0	0	0.460722	0.290127	0.943442	4.38307	0.829575	NA	0.25256	0.159043	0.992523	4.38784	0.821047	NA	0	0	0	4.40736	1	NA
FBgn0002941	slou	3R	21548661	21557182	-	2670	0.328379	0.122988	0	0	-1.70675	4.40736	0.698571	NA	0	0	-0.913758	4.40736	0.835756	NA	0.482516	0.180718	0.00910307	4.36022	0.998334	NA
FBgn0002945	nkd	3L	19003741	19045449	-	5062	291.685	57.6224	239.656	47.3442	-0.289575	0.27616	0.294373	0.426377	293.594	57.9996	-0.0468249	0.279749	0.86707	0.907972	279.549	55.2251	-0.0684467	0.274997	0.803438	0.960865
FBgn0002948	nod	X	11580772	11585750	+	2449	210.728	86.0464	333.483	136.171	0.640951	0.258141	0.0130298	0.0359133	344.873	140.822	0.701258	0.261723	0.0073757	0.0174736	245.408	100.207	0.198248	0.258604	0.443315	0.85042
FBgn0002962	nos	3R	19157238	19160202	+	2349	1.42345	0.605979	0.230361	0.0980677	-2.40957	2.37471	0.310257	NA	0	0	-2.57837	2.37471	0.277583	NA	0.448843	0.191078	-1.75158	2.30043	0.446408	NA
FBgn0002973	numb	2L	9437469	9464184	+	4916	242.969	49.4241	557.957	113.498	1.17977	0.196443	1.90552e-09	2.87159e-08	738.637	150.252	1.56976	0.198215	2.38444e-15	3.84953e-14	424.089	86.267	0.784128	0.196714	6.71603e-05	0.0165061
FBgn0002985	odd	2L	3604224	3606756	-	2347	23.3192	9.93573	7.84442	3.34232	-1.56117	0.424797	0.000237751	0.00117732	8.07253	3.43951	-1.79882	0.481928	0.000189543	0.000648517	28.0484	11.9508	0.273462	0.356785	0.443401	0.85042
FBgn0002989	okr	2L	2989594	2992759	-	2878	67.759	23.5438	66.693	23.1734	-0.00727361	0.240032	0.975826	0.985879	72.197	25.0858	-0.0282523	0.252752	0.910999	0.937604	66.5471	23.1227	-0.0113242	0.237397	0.961954	0.993842
FBgn0003002	opa	3R	4852813	4869979	+	2939	0	0	0.252983	0.0860779	0.216791	4.40736	0.960769	NA	0.25256	0.0859341	0.99253	4.38784	0.821046	NA	0	0	0	4.40736	1	NA
FBgn0003008	or	2R	23967939	23968943	+	823	126.283	153.442	207.529	252.162	0.748233	0.304416	0.0139741	0.0380871	223.36	271.397	0.886109	0.308753	0.0041052	0.0103944	115.484	140.321	-0.0960518	0.306653	0.754108	0.949491
FBgn0003009	ord	2R	23271257	23275536	-	3915	0	0	0	0	0	4.40736	1	NA	0	0	0	4.40736	1	NA	0.207585	0.0530229	-0.0223957	4.40736	0.995946	NA
FBgn0003011	ort	3R	19659748	19663672	+	2158	0.328379	0.152168	0.460722	0.213495	0.0276274	2.48065	0.991114	NA	0	0	-0.913783	2.5309	0.718061	NA	1.13726	0.526996	1.25275	2.33006	0.590822	NA
FBgn0003015	osk	3R	8935126	8938395	+	2869	0.328379	0.114458	0.230361	0.0802932	-0.74495	4.40736	0.865778	NA	0	0	-0.913748	4.40736	0.835757	NA	0	0	-1.94593	4.40736	0.658837	NA
FBgn0003016	osp	2L	14599196	14689340	-	6846	309.24	45.1708	381.718	55.7578	0.295971	0.2463	0.229491	0.353367	405.919	59.2929	0.345585	0.249648	0.166271	0.248255	423.638	61.8811	0.446404	0.245587	0.0691096	0.598943
FBgn0003023	otu	X	8485008	8489535	-	3420	0.328379	0.0960173	19.5722	5.72287	5.36415	1.229	1.27339e-05	8.87847e-05	44.3435	12.9659	6.56326	1.22696	8.83451e-08	5.47292e-07	1.53475	0.448757	1.71289	1.33437	0.199259	0.725865
FBgn0003028	ovo	X	5048273	5070929	+	7400	0.723128	0.09772	0	0	-1.70677	2.81827	0.544773	NA	2.20152	0.297503	2.05683	2.66964	0.441032	NA	0.223579	0.0302133	-0.984178	2.81827	0.726929	NA
FBgn0003034	SP	3L	13301635	13301922	+	223	0	0	0	0	NA	NA	NA	NA	0	0	NA	NA	NA	NA	0	0	NA	NA	NA	NA
FBgn0003041	pbl	3L	7896109	7911954	-	5781	880.572	152.322	889.284	153.829	0.00994365	0.327464	0.975775	0.985879	788.691	136.428	-0.160313	0.329005	0.626071	0.713428	1110.28	192.056	0.329969	0.327153	0.313163	0.80303
FBgn0003042	Pc	3L	21306138	21318020	-	2462	119.611	48.583	225.479	91.5838	0.908342	0.202679	7.40555e-06	5.50674e-05	228.279	92.7208	0.902338	0.208678	1.53185e-05	6.51666e-05	133.929	54.3985	0.151487	0.205223	0.460419	0.853554
FBgn0003044	Pcl	2R	18135426	18139990	+	4384	760.135	173.388	645.658	147.276	-0.234951	0.177912	0.186633	0.301712	491.733	112.165	-0.624655	0.182245	0.000609024	0.0018768	646.623	147.496	-0.234959	0.177531	0.185674	0.716217
FBgn0003046	Pcp	2L	7021682	7022470	+	718	0.693401	0.96574	0.315954	0.440048	-1.50652	2.26524	0.506012	NA	0.276259	0.384762	-0.69169	2.22117	0.75549	NA	0.690101	0.961143	-0.239513	2.10378	0.909357	NA
FBgn0003048	pcx	X	2225296	2238045	+	12119	1078.44	88.9874	1896.74	156.51	0.810639	0.257429	0.00163843	0.00620112	2518.14	207.784	1.21644	0.25787	2.39062e-06	1.171e-05	1103.25	91.0351	0.0287218	0.257683	0.91125	0.9845
FBgn0003053	peb	X	4617564	4627206	+	7446	24.6417	3.30938	23.614	3.17136	-0.0187162	0.434946	0.965677	0.980315	68.571	9.20911	1.37673	0.428813	0.0013248	0.00378151	13.2072	1.77373	-0.857288	0.448442	0.0559141	0.563823
FBgn0003057	CG10598	X	17225157	17226867	-	1711	0	0	0	0	NA	NA	NA	NA	0	0	NA	NA	NA	NA	0	0	NA	NA	NA	NA
FBgn0003060	CG9757	3R	13611583	13612433	-	851	0	0	0	0	NA	NA	NA	NA	0	0	NA	NA	NA	NA	0	0	NA	NA	NA	NA
FBgn0003062	Fib	2R	23072909	23074725	-	1318	655.823	497.589	651.274	494.138	-0.00837743	0.195685	0.965852	0.980315	630.103	478.075	-0.03902	0.198432	0.844108	0.890309	527.438	400.181	-0.311201	0.195769	0.111918	0.662571
FBgn0003065	CG2150	3R	31763304	31764772	-	1170	99.1812	84.7703	249.319	213.093	1.33668	0.286121	2.98649e-06	2.44563e-05	455.22	389.077	2.18313	0.28712	2.88124e-14	4.02108e-13	180.992	154.694	0.875314	0.286739	0.00226827	0.153635
FBgn0003067	Pepck1	2R	18536767	18539416	+	2486	0	0	0	0	NA	NA	NA	NA	0	0	NA	NA	NA	NA	0	0	NA	NA	NA	NA
FBgn0003068	per	X	2685580	2692780	+	4527	45.8557	10.1294	34.3385	7.58527	-0.483968	0.368669	0.189269	0.304585	48.3101	10.6716	-0.0836154	0.378105	0.824981	0.874656	47.2964	10.4476	-0.0195112	0.360089	0.956788	0.992865
FBgn0003071	Pfk	2R	10109740	10117457	+	4377	890.611	203.475	280.617	64.1118	-1.67248	0.139336	3.41964e-33	5.95609e-31	289.96	66.2463	-1.64503	0.145342	1.064e-29	5.98548e-28	708.489	161.866	-0.335991	0.134548	0.0125186	0.349181
FBgn0003074	Pgi	2R	8910900	8914069	-	2460	831.98	338.203	423.398	172.113	-0.97443	0.215851	6.35066e-06	4.79192e-05	267.639	108.796	-1.58259	0.222514	1.14132e-12	1.33037e-11	727.993	295.932	-0.193546	0.214301	0.366447	0.820131
FBgn0003076	Pgm1	3L	16126018	16128531	-	1843	534.195	289.851	120.421	65.3399	-2.14522	0.403573	1.06325e-07	1.13963e-06	132.504	71.8956	-2.07021	0.409754	4.36467e-07	2.40895e-06	250.929	136.152	-1.0847	0.400157	0.00671464	0.25901
FBgn0003079	Raf	X	2295466	2343870	+	4247	230.101	54.1796	339.313	79.8948	0.570209	0.176388	0.00122627	0.00490069	370.095	87.1428	0.645592	0.180753	0.000354692	0.00114935	362.384	85.3271	0.664957	0.175411	0.000150125	0.0293495
FBgn0003082	phr	2R	7825289	7827319	+	1969	219.554	111.505	127.829	64.921	-0.761241	0.192098	7.40846e-05	0.000419627	93.6611	47.5679	-1.14355	0.206304	2.97261e-08	1.96805e-07	184.941	93.9261	-0.22664	0.187345	0.226377	0.739573
FBgn0003086	Pig1	X	3248600	3249289	-	690	0	0	0	0	NA	NA	NA	NA	0	0	NA	NA	NA	NA	0	0	NA	NA	NA	NA
FBgn0003087	pim	2L	10362989	10364092	+	978	70.4068	71.9906	88.2071	90.1913	0.313335	0.268178	0.242652	0.368063	52.698	53.8834	-0.537264	0.292382	0.06613	0.114982	70.7	72.2904	0.00150055	0.268731	0.995545	1
FBgn0003089	pip	3L	19298623	19337609	-	10964	0	0	0.315954	0.0288174	0.216791	4.40736	0.960769	NA	0	0	0	4.40736	1	NA	0.207585	0.0189333	-0.022405	4.40736	0.995944	NA
FBgn0003090	pk	2R	7150703	7223378	+	6748	11.4525	1.69717	87.583	12.9791	2.76874	0.390355	1.3134e-12	3.05797e-11	109.027	16.1569	3.03203	0.395928	1.88804e-14	2.68867e-13	21.5027	3.18653	0.73571	0.409678	0.072522	0.612421
FBgn0003091	Pkc53E	2R	16924655	16945126	+	5739	0	0	0	0	NA	NA	NA	NA	0	0	NA	NA	NA	NA	0	0	NA	NA	NA	NA
FBgn0003093	Pkc98E	3R	29039156	29049148	+	5772	1312.14	227.328	987.467	171.079	-0.408445	0.360018	0.256579	0.384205	1334.28	231.164	0.0168001	0.360606	0.962841	0.974243	978.844	169.585	-0.421075	0.3599	0.242011	0.753838
FBgn0003114	plu	2R	20262958	20263684	-	616	0.328379	0.533083	0.252983	0.410687	-0.74496	4.36215	0.864398	NA	0.276259	0.448472	0.100196	4.33825	0.981574	NA	0	0	-1.94594	4.36215	0.655527	NA
FBgn0003116	pn	X	2181211	2182916	+	1638	29.2611	17.8639	31.262	19.0855	0.0687105	0.358368	0.847952	0.901821	32.4257	19.7959	0.0365527	0.377223	0.922806	0.946478	37.0086	22.5937	0.328237	0.350992	0.349701	0.814457
FBgn0003117	pnr	3R	16026079	16041796	+	4361	930.93	213.467	1123.79	257.691	0.268642	0.344528	0.435545	0.568651	1623.26	372.221	0.793061	0.344985	0.0215149	0.0440363	1175	269.434	0.332826	0.344388	0.333831	0.807721
FBgn0003118	pnt	3R	23290231	23346167	-	6119	2302.41	376.273	6675.97	1091.02	1.53609	0.34278	7.41985e-06	5.51284e-05	10722	1752.25	2.2183	0.342838	9.77354e-11	9.09753e-10	1729.82	282.697	-0.412295	0.343052	0.229424	0.742557
FBgn0003124	polo	3L	20309654	20313466	+	2980	1453.03	487.594	1318.5	442.448	-0.1393	0.123182	0.258119	0.386028	914.337	306.824	-0.67385	0.126689	1.04382e-07	6.37055e-07	1101.83	369.743	-0.398265	0.123195	0.00122581	0.097779
FBgn0003129	Poxm	3R	8319025	8333792	-	2566	0	0	0.736327	0.286955	1.60319	3.92885	0.683233	NA	0.505121	0.196851	1.63765	3.95254	0.678634	NA	0	0	0	4.00966	1	NA
FBgn0003130	Poxn	2R	15826693	15835055	-	2458	0	0	0	0	NA	NA	NA	NA	0	0	NA	NA	NA	NA	0	0	NA	NA	NA	NA
FBgn0003132	Pp1-13C	X	15359101	15361061	-	1892	0	0	0	0	NA	NA	NA	NA	0	0	NA	NA	NA	NA	0	0	NA	NA	NA	NA
FBgn0003134	Pp1alpha-96A	3R	24518270	24522331	+	3210	2173.28	677.036	1911.59	595.512	-0.183	0.207074	0.376838	0.512465	1996.31	621.904	-0.125808	0.207941	0.545167	0.642245	1797.53	559.979	-0.271692	0.207001	0.189346	0.71806
FBgn0003137	Ppn	3R	28520665	28540324	-	9544	1705.09	178.656	1275.02	133.593	-0.42097	0.394212	0.285575	0.41717	1423.56	149.158	-0.258858	0.394823	0.512062	0.611195	1870.03	195.937	0.131434	0.393977	0.738674	0.946533
FBgn0003139	PpV	X	6371065	6372915	-	1675	637.118	380.369	694.961	414.902	0.129515	0.16693	0.437828	0.570974	592.744	353.877	-0.0757922	0.170459	0.656584	0.740927	659.701	393.852	0.0545762	0.166659	0.743311	0.947394
FBgn0003140	PpY-55A	2R	17955396	17956570	-	1175	0	0	0	0	NA	NA	NA	NA	0	0	NA	NA	NA	NA	0	0	NA	NA	NA	NA
FBgn0003141	pr	2L	20073719	20075458	-	1073	401.36	374.054	490.192	456.842	0.294404	0.179004	0.100037	0.186426	457.784	426.639	0.234218	0.182846	0.200208	0.289477	456.267	425.225	0.191295	0.178703	0.284412	0.780803
FBgn0003145	prd	2L	12082995	12085827	-	2695	0	0	0.252983	0.0938712	0.2168	4.40736	0.960767	NA	0	0	0	4.40736	1	NA	0	0	0	4.40736	1	NA
FBgn0003149	Prm	3L	8732858	8745310	-	5356	0	0	0.944066	0.176263	2.00111	2.09082	0.33852	NA	2.39154	0.446515	3.48266	2.05193	0.0896474	NA	0.223579	0.0417436	-0.0224025	2.27928	0.992158	NA
FBgn0003159	CG2841	X	2344949	2366356	-	5650	228.215	40.3921	632.973	112.031	1.44905	0.205528	1.78415e-12	4.07029e-11	759.844	134.486	1.70943	0.207388	1.68373e-16	3.18362e-15	303.632	53.7402	0.38879	0.207129	0.060512	0.57453
FBgn0003162	Pu	2R	21175315	21182608	+	2152	1531.86	711.831	2186.01	1015.81	0.509563	0.227395	0.0250342	0.0613127	2280.45	1059.69	0.569665	0.22809	0.0125056	0.0276184	2346.63	1090.44	0.611918	0.227274	0.00709347	0.268802
FBgn0003165	pum	3R	9066343	9237682	-	11798	1754.78	148.735	1894.2	160.553	0.110966	0.385808	0.773638	0.845603	4706.85	398.953	1.42151	0.385792	0.00022902	0.000771377	542.625	45.9929	-1.69262	0.386543	1.19299e-05	0.00575245
FBgn0003169	put	3R	14619030	14625703	-	4013	292.78	72.9578	540.685	134.733	0.864718	0.179434	1.4417e-06	1.26772e-05	836.431	208.43	1.49553	0.18068	1.26045e-16	2.42376e-15	305.278	76.0724	0.0395297	0.180831	0.826962	0.963903
FBgn0003174	pwn	2R	7282572	7300806	+	5810	35.5978	6.12699	27.0211	4.65079	-0.406655	0.31237	0.192971	0.30917	28.7244	4.94396	-0.451488	0.333425	0.175707	0.260071	47.4417	8.16553	0.392841	0.295309	0.183428	0.711557
FBgn0003175	px	2R	22494297	22562065	-	10746	895.495	83.3328	1931.75	179.765	1.10416	0.288354	0.000128569	0.000679775	2135.48	198.723	1.24815	0.288916	1.55964e-05	6.61623e-05	1043.13	97.0719	0.215095	0.288631	0.456137	0.853554
FBgn0003187	qua	2L	17486806	17497208	-	3792	0.365022	0.0962611	1.11525	0.294107	1.1903	1.81926	0.512935	NA	0.528819	0.139457	0.720057	1.91754	0.707281	NA	0.654742	0.172664	0.478246	1.87227	0.798386	NA
FBgn0003189	r	X	16655359	16668712	+	7126	302.657	42.4723	114.802	16.1104	-1.41175	0.198537	1.15408e-12	2.70789e-11	104.718	14.6953	-1.62473	0.211311	1.48518e-14	2.17658e-13	236.505	33.1891	-0.368814	0.19125	0.0538009	0.56061
FBgn0003204	ras	X	10744502	10749097	+	2866	174.851	61.0088	110.921	38.7023	-0.659182	0.196667	0.000802985	0.00340798	75.8499	26.4654	-1.11284	0.213219	1.79662e-07	1.05868e-06	146.875	51.2473	-0.256817	0.192057	0.181161	0.710412
FBgn0003205	Ras85D	3R	9510561	9513067	-	1958	1186.46	605.954	2009.67	1026.39	0.759327	0.293294	0.00962663	0.0279271	1432.37	731.547	0.279736	0.29436	0.34195	0.44549	1427.45	729.034	0.26581	0.293381	0.364924	0.820131
FBgn0003206	Ras64B	3L	4139076	4141398	+	1620	853.128	526.622	1130.03	697.551	0.405167	0.110651	0.000250593	0.0012355	1514.06	934.606	0.816188	0.112043	3.22625e-13	3.99182e-12	909.293	561.292	0.0917182	0.110755	0.407603	0.835813
FBgn0003209	raw	2L	8709880	8740660	-	5011	297.119	59.2933	372.865	74.4092	0.315279	0.209742	0.132794	0.232678	474.347	94.6611	0.642951	0.212368	0.00246564	0.00658935	275.965	55.0719	-0.120962	0.210234	0.565044	0.898707
FBgn0003210	rb	X	4535635	4540626	-	4813	420.312	87.3284	143.577	29.831	-1.54442	0.489452	0.00160277	0.00610183	217.14	45.1152	-0.989054	0.491676	0.0442624	0.0817699	237.788	49.4055	-0.817092	0.48751	0.0937283	0.640736
FBgn0003218	rdgB	X	13762752	13779488	+	9281	249.561	26.8895	352.525	37.9835	0.49404	0.304012	0.104148	0.191877	700.173	75.4416	1.46318	0.304482	1.54378e-06	7.82866e-06	227.515	24.514	-0.138045	0.304798	0.650615	0.922096
FBgn0003227	rec	3R	15823019	15832632	-	4131	37.2452	9.01603	24.0027	5.81038	-0.671017	0.364368	0.0655347	0.133082	12.612	3.05302	-1.33913	0.410516	0.00110603	0.00321582	41.7387	10.1038	0.13407	0.347697	0.699796	0.936164
FBgn0003231	ref(2)P	2L	19542468	19545548	+	2395	946.786	395.318	1341.64	560.183	0.498148	0.182801	0.00642845	0.0198644	1276.9	533.154	0.433244	0.184366	0.0187776	0.0391321	982.873	410.386	0.0488126	0.182969	0.789638	0.956169
FBgn0003248	Rh2	3R	18899423	18901019	+	1365	0.328379	0.240571	0	0	-1.70674	4.40736	0.698573	NA	0	0	-0.913748	4.40736	0.835757	NA	0.241258	0.176746	-0.984146	4.40736	0.823305	NA
FBgn0003249	Rh3	3R	20081060	20082450	-	1391	0	0	0.315954	0.227142	0.2168	4.40736	0.960767	NA	0	0	0	4.40736	1	NA	0	0	0	4.40736	1	NA
FBgn0003250	Rh4	3L	16852527	16862517	-	1349	1.42345	1.05519	0.230361	0.170764	-2.4576	1.87556	0.190085	NA	0.25256	0.18722	-1.686	1.82815	0.356401	NA	1.13726	0.843038	-0.464197	1.59451	0.770957	NA
FBgn0003254	rib	2R	19270078	19281396	+	4665	1.67854	0.359815	5.36473	1.14999	1.43835	1.0331	0.163839	0.273983	2.36784	0.507575	0.615676	1.12416	0.583914	0.677146	2.79239	0.598583	0.482808	1.06458	0.650175	0.92184
FBgn0003255	rk	2L	13982743	14001248	-	5386	5.70968	1.0601	26.6184	4.94215	2.26847	0.615575	0.000228596	0.00113757	60.6023	11.2518	3.35705	0.615409	4.89751e-08	3.15482e-07	5.00293	0.928877	-0.159981	0.672429	0.811947	0.961881
FBgn0003256	rl	2R	1071462	1125927	+	7591	297.361	39.1728	415.965	54.7972	0.476372	0.320547	0.137246	0.238542	392.225	51.6697	0.413369	0.323408	0.20119	0.290619	396.856	52.2798	0.407825	0.320302	0.202929	0.727507
FBgn0003257	r-l	3R	21070557	21073319	-	2039	156.876	76.9377	36.6429	17.971	-2.10472	0.212559	4.08815e-23	3.36693e-21	33.1924	16.2788	-2.24018	0.235636	1.96337e-21	5.64516e-20	122.152	59.9077	-0.361591	0.184271	0.04973	0.553148
FBgn0003261	Rm62	3R	6000426	6008579	-	5386	8144.3	1512.12	7494.43	1391.47	-0.119653	0.062736	0.0564898	0.118132	6358.39	1180.54	-0.353466	0.0636839	2.85162e-08	1.89348e-07	7084.41	1315.34	-0.200655	0.0626714	0.00136616	0.106398
FBgn0003267	ro	3R	26876771	26881171	-	1241	0	0	0	0	NA	NA	NA	NA	0	0	NA	NA	NA	NA	0	0	NA	NA	NA	NA
FBgn0003268	rod	3R	31580951	31588244	+	6479	491.079	75.7955	307.317	47.4328	-0.68527	0.246993	0.00552958	0.0174865	300.459	46.3742	-0.720477	0.251458	0.00416748	0.0105286	592.205	91.4037	0.25989	0.244933	0.28866	0.785031
FBgn0003270	amos	2L	18596136	18596921	-	786	0	0	0	0	NA	NA	NA	NA	0	0	NA	NA	NA	NA	0	0	NA	NA	NA	NA
FBgn0003274	RpLP2	2R	16586129	16586732	+	604	8286.55	13719.5	1486.07	2460.39	-2.47916	0.948803	0.00897683	0.0264314	4244.39	7027.13	-0.965913	0.94877	0.308646	0.410606	3924.52	6497.56	-1.07813	0.948669	0.25576	0.765083
FBgn0003275	RpII18	3R	5371795	5372397	+	541	839.315	1551.41	1414.44	2614.5	0.755746	0.237948	0.00149269	0.0057676	1428.66	2640.78	0.779457	0.239009	0.00110938	0.00322454	907.629	1677.69	0.116096	0.238204	0.625989	0.916271
FBgn0003277	RpII215	X	11562800	11570326	-	6736	1123.09	166.73	1152.72	171.128	0.0385341	0.16971	0.820378	0.881919	1313.27	194.962	0.211904	0.171143	0.215653	0.306716	920.567	136.664	-0.286659	0.169787	0.0913452	0.638734
FBgn0003278	RpI135	2L	404285	407969	+	3564	273.511	76.7427	125.441	35.1967	-1.12869	0.171165	4.27699e-11	8.07014e-10	71.7744	20.1387	-1.94451	0.193914	1.15189e-23	3.93685e-22	190.78	53.5296	-0.520685	0.165329	0.00163612	0.122382
FBgn0003279	RpL4	3R	27922821	27924888	+	1400	26202.2	18715.9	10459.5	7471.07	-1.32481	0.194971	1.08379e-11	2.2216e-10	9210.61	6579.01	-1.50981	0.195201	1.03683e-14	1.54704e-13	22964.3	16403.1	-0.190171	0.194887	0.329165	0.807108
FBgn0003285	rst	X	2950399	2973834	-	6251	53.9097	8.62417	52.112	8.33658	-0.0474018	0.252389	0.851023	0.903317	68.1181	10.8971	0.25247	0.260792	0.332998	0.435833	68.1684	10.9052	0.347299	0.244764	0.155925	0.694275
FBgn0003292	rt	3L	11584122	11587770	-	3268	1.35016	0.413146	1.02966	0.315073	-0.577773	1.42169	0.684449	0.779167	0.276259	0.0845346	-1.65666	1.64035	0.312523	0.414304	1.10358	0.337694	-0.482331	1.38279	0.727232	NA
FBgn0003295	ru	3L	1370628	1387437	+	1798	0.328379	0.182636	0	0	-1.70674	4.40736	0.698573	NA	0.25256	0.140467	0.0307904	4.38784	0.994401	NA	0	0	-1.94593	4.40736	0.658837	NA
FBgn0003300	run	X	20690670	20697321	+	3145	0	0	0	0	NA	NA	NA	NA	0	0	NA	NA	NA	NA	0	0	NA	NA	NA	NA
FBgn0003301	rut	X	14787478	14826073	-	9618	9.92262	1.03167	17.5317	1.8228	0.911008	0.457322	0.0463656	0.100776	19.4757	2.02493	0.948362	0.477218	0.0468922	0.0857119	11.1739	1.16177	0.250839	0.468677	0.592507	0.904392
FBgn0003302	rux	X	6035753	6037800	-	1463	36.8692	25.2011	58.8837	40.2486	0.660138	0.260752	0.0113522	0.0320501	89.5859	61.2344	1.26418	0.264045	1.6867e-06	8.50108e-06	46.7984	31.988	0.332005	0.261855	0.204834	0.728091
FBgn0003308	ry	3R	13032528	13038020	+	4337	5.29212	1.22023	3.30161	0.761266	-0.792259	0.874248	0.364821	0.500103	0.505121	0.116468	-2.89851	1.20785	0.016407	0.0348166	5.39536	1.24403	-0.106734	0.828561	0.897501	0.981141
FBgn0003310	S	2L	1049674	1077815	-	5206	994.035	190.94	3425.75	658.038	1.78425	0.294223	1.32542e-09	2.05553e-08	6674.5	1282.08	2.74414	0.294283	1.11152e-20	3.00508e-19	1003.51	192.761	0.0128294	0.294737	0.96528	0.994294
FBgn0003312	sad	3R	11877235	11879754	+	1773	0	0	0	0	NA	NA	NA	NA	0	0	NA	NA	NA	NA	0	0	NA	NA	NA	NA
FBgn0003313	sala	2L	11484707	11486949	+	1697	0	0	0	0	NA	NA	NA	NA	0	0	NA	NA	NA	NA	0	0	NA	NA	NA	NA
FBgn0003317	sax	2R	7806484	7810067	+	2865	311.764	108.818	531.005	185.342	0.752236	0.174206	1.57395e-05	0.000106941	702.54	245.215	1.14174	0.176209	9.20487e-11	8.61245e-10	338.445	118.131	0.101549	0.175167	0.5621	0.897065
FBgn0003319	Sb	3R	16116161	16145284	+	4180	0	0	1.45383	0.347806	2.55219	2.53072	0.313222	NA	1.3339	0.319114	2.69383	2.57712	0.295891	NA	0	0	0	2.72139	1	NA
FBgn0003321	sbr	X	10832752	10847092	-	3545	495.505	139.776	485.4	136.925	-0.0389511	0.205739	0.84984	0.903003	577.909	163.021	0.192726	0.208195	0.354604	0.458675	521.538	147.119	0.0640166	0.205139	0.754992	0.949757
FBgn0003326	sca	2R	12780541	12802010	+	3796	1.75182	0.461492	5.69951	1.50145	1.4976	0.919321	0.103306	0.190675	8.76767	2.30971	2.13444	0.926676	0.0212605	0.0436043	1.62146	0.42715	-0.357574	1.0213	0.72625	0.945347
FBgn0003330	Sce	3R	27680431	27682029	-	1542	126.102	81.7779	263.105	170.626	1.07688	0.155984	5.06473e-12	1.0974e-10	236.93	153.651	0.914066	0.162888	2.00449e-08	1.36194e-07	142.967	92.7151	0.199563	0.159643	0.211278	0.730276
FBgn0003334	Scm	3R	9633359	9637611	-	4069	715.879	175.935	978.558	240.491	0.445343	0.163617	0.00649135	0.0200042	1167.48	286.92	0.688647	0.16517	3.05494e-05	0.000122373	728.893	179.133	0.0200499	0.163842	0.902603	0.982021
FBgn0003339	Scr	3R	6823120	6849981	-	4577	0.328379	0.0717455	0	0	-1.70673	4.40736	0.698575	NA	0	0	-0.913739	4.40736	0.835759	NA	0	0	-1.94592	4.40736	0.658839	NA
FBgn0003345	sd	X	15804370	15827682	+	8766	13877.3	1583.08	10674.8	1217.75	-0.378361	0.437632	0.387278	0.522194	17705.2	2019.76	0.351058	0.437657	0.422477	0.527122	8799.35	1003.8	-0.65709	0.437633	0.133235	0.676224
FBgn0003346	RanGAP	2L	19441959	19447317	+	2401	1518.51	632.448	820.294	341.647	-0.885133	0.240058	0.000226765	0.00112971	477.782	198.993	-1.65889	0.244017	1.05895e-11	1.10622e-10	1419.6	591.253	-0.0933545	0.239333	0.696492	0.934742
FBgn0003353	sei	2R	24047411	24053035	+	3278	91.623	27.9509	85.4084	26.055	-0.12854	0.25552	0.614928	0.72424	87.0588	26.5585	-0.143166	0.266524	0.591157	0.683532	113.768	34.7067	0.277749	0.250904	0.268297	0.769067
FBgn0003356	Jon99Cii	3R	29923754	29924615	-	862	0	0	0	0	NA	NA	NA	NA	0	0	NA	NA	NA	NA	0	0	NA	NA	NA	NA
FBgn0003357	Jon99Ciii	3R	29922216	29923455	+	1240	0	0	0	0	NA	NA	NA	NA	0	0	NA	NA	NA	NA	0	0	NA	NA	NA	NA
FBgn0003358	Jon99Ci	3R	29925226	29926189	-	907	0	0	0	0	0	4.40736	1	NA	0	0	0	4.40736	1	NA	0.415169	0.457739	0.778093	4.37615	0.858878	NA
FBgn0003360	sesB	X	10780893	10786958	-	2006	14535.5	7246.01	4624.46	2305.31	-1.65206	0.421928	9.02208e-05	0.000498554	6403.19	3192.02	-1.18399	0.42203	0.00502429	0.0124331	8646.56	4310.35	-0.749199	0.42185	0.0757357	0.618081
FBgn0003366	sev	X	11071441	11086299	-	8171	0.693401	0.0848612	0.483344	0.0591536	-0.68289	2.20019	0.756274	NA	0.276259	0.0338097	-0.691652	2.22162	0.755551	NA	0.223579	0.0273624	-1.74569	2.26568	0.441007	NA
FBgn0003371	sgg	X	2633952	2679553	+	12445	4603.89	369.939	5565.56	447.213	0.274256	0.218346	0.209093	0.329692	7995.36	642.455	0.794841	0.218494	0.000274962	0.000911875	3460.49	278.063	-0.411335	0.218426	0.0596764	0.572281
FBgn0003372	Sgs1	2L	4937409	4941423	+	3950	0	0	13.9466	3.53078	5.84319	1.25865	3.44332e-06	2.77704e-05	24.591	6.22558	6.6967	1.25917	1.04723e-07	6.38704e-07	0.241258	0.061078	-0.0224044	1.71244	0.989561	0.999184
FBgn0003373	Sgs3	3L	11512221	11513402	+	1109	0	0	0	0	NA	NA	NA	NA	0	0	NA	NA	NA	NA	0	0	NA	NA	NA	NA
FBgn0003374	Sgs4	X	3250089	3251040	+	952	0	0	0	0	NA	NA	NA	NA	0	0	NA	NA	NA	NA	0	0	NA	NA	NA	NA
FBgn0003375	Sgs5	3R	17595362	17596112	+	636	0	0	0	0	NA	NA	NA	NA	0	0	NA	NA	NA	NA	0	0	NA	NA	NA	NA
FBgn0003377	Sgs7	3L	11509861	11510247	+	321	0	0	0	0	NA	NA	NA	NA	0	0	NA	NA	NA	NA	0	0	NA	NA	NA	NA
FBgn0003378	Sgs8	3L	11508967	11509394	-	359	0	0	0	0	NA	NA	NA	NA	0	0	NA	NA	NA	NA	0	0	NA	NA	NA	NA
FBgn0003380	Sh	X	17924307	18063247	-	22552	7.3813	0.327301	6.24093	0.276735	-0.213858	0.758447	0.777968	0.848207	39.6096	1.75637	2.30248	0.721154	0.00140913	0.00399952	5.18778	0.230036	-0.487686	0.75972	0.520919	0.880863
FBgn0003382	sha	2R	11324314	11336463	+	6115	0.328379	0.0537006	1.17822	0.192678	1.23511	1.79955	0.492495	NA	1.05764	0.172958	1.5285	1.83087	0.403803	NA	0.913679	0.149416	0.927547	1.80601	0.60754	NA
FBgn0003386	Shaw	2L	3718185	3729145	+	5000	9.93645	1.98729	4.6246	0.924921	-1.10205	0.744901	0.139019	0.240884	13.4536	2.69071	0.178293	0.726209	0.80606	0.860312	3.9086	0.78172	-1.37303	0.746567	0.0658973	0.5917
FBgn0003388	shd	3L	14614458	14622205	+	3016	0.328379	0.108879	0	0	-1.70677	3.02556	0.572674	NA	1.37275	0.455154	0.338706	2.97109	0.909238	NA	0.929673	0.308247	0.959175	2.87588	0.738739	NA
FBgn0003390	shf	X	6771463	6779659	-	1796	2.0802	1.15824	3.53197	1.96658	0.588016	0.971137	0.544852	0.667938	5.18443	2.88665	0.870238	1.00062	0.384463	0.488097	2.03494	1.13304	-0.241563	1.01008	0.810988	0.96186
FBgn0003391	shg	2R	21049654	21057197	-	6400	286.798	44.8123	584.05	91.2577	1.02079	0.312779	0.00110008	0.0044719	1161.89	181.545	2.00076	0.313063	1.64906e-10	1.49805e-09	374.926	58.5822	0.380841	0.313251	0.224073	0.735396
FBgn0003392	shi	X	15892116	15906716	+	5989	1690.52	282.271	2030.13	338.977	0.260384	0.121104	0.0315481	0.0738514	2385.77	398.359	0.490566	0.122149	5.916e-05	0.000224377	1566.44	261.553	-0.113749	0.121206	0.348	0.814457
FBgn0003396	shn	2R	11159086	11217394	+	10997	2797.74	254.409	2260.33	205.541	-0.308775	0.298847	0.301501	0.433719	2447.57	222.568	-0.196251	0.299332	0.512062	0.611195	2124.45	193.184	-0.398477	0.298804	0.182344	0.710666
FBgn0003401	shu	2R	23841461	23843286	-	1694	405.833	239.571	337.07	198.979	-0.27974	0.204025	0.170341	0.281838	394.635	232.96	-0.0725273	0.207488	0.726676	0.796311	515.111	304.08	0.333196	0.202207	0.0993948	0.642855
FBgn0003410	sina	3L	16853751	16858712	+	3257	607.352	186.476	981.185	301.254	0.696535	0.310588	0.0249204	0.0610838	1798.25	552.12	1.56368	0.310852	4.89699e-07	2.68475e-06	583.852	179.261	-0.052186	0.310964	0.866725	0.974468
FBgn0003411	sisA	X	11321579	11322357	-	779	0	0	0	0	NA	NA	NA	NA	0	0	NA	NA	NA	NA	0	0	NA	NA	NA	NA
FBgn0003415	skd	3L	20992814	21027434	-	12307	1816.5	147.599	2497.71	202.95	0.457846	0.333476	0.169768	0.281256	3326.83	270.32	0.868281	0.333736	0.00927637	0.0213077	2123.83	172.571	0.223866	0.333473	0.502018	0.874515
FBgn0003416	sl	X	16350315	16356482	+	5678	213.271	37.5609	345.269	60.8082	0.674298	0.201678	0.000827471	0.00349879	405.794	71.4678	0.90143	0.204967	1.09289e-05	4.7841e-05	183.687	32.3506	-0.238121	0.203988	0.243078	0.753838
FBgn0003423	slgA	X	21374002	21385159	+	4305	924.192	214.679	617.822	143.513	-0.586665	0.249835	0.0188638	0.0486751	569.822	132.363	-0.700164	0.252435	0.00554334	0.0135619	1114.06	258.784	0.264085	0.248875	0.288638	0.785031
FBgn0003429	slo	3R	24662491	24711595	+	10153	1.71518	0.168933	0.315954	0.0311193	-2.69451	2.15704	0.211603	0.332666	2.20152	0.216835	0.0124279	1.95334	0.994924	0.996568	0	0	-3.89551	2.15704	0.0709268	NA
FBgn0003430	slp1	2L	3825675	3827099	+	1425	0	0	0	0	NA	NA	NA	NA	0	0	NA	NA	NA	NA	0	0	NA	NA	NA	NA
FBgn0003435	sm	2R	19517864	19631508	-	16635	118.848	7.14446	194.666	11.7022	0.715008	0.254341	0.00493546	0.0158794	402.551	24.199	1.72234	0.254907	1.41118e-11	1.4491e-10	142.568	8.57037	0.263765	0.255187	0.301316	0.796086
FBgn0003444	smo	2L	277582	282167	+	4008	267.527	66.7483	258.173	64.4144	-0.0664911	0.221322	0.763851	0.83969	238.241	59.4413	-0.190655	0.227405	0.40181	0.506217	265.567	66.2591	-0.0274674	0.220449	0.900842	0.981886
FBgn0003447	sn	X	7964024	7986601	+	3507	285.629	81.4453	1514.54	431.861	2.41504	0.332606	3.84301e-13	9.69531e-12	3352.75	956.017	3.55799	0.332645	1.0622e-26	4.60305e-25	370.766	105.722	0.384641	0.333944	0.249398	0.757332
FBgn0003448	sna	2L	15476593	15478260	-	1668	0	0	2.16753	1.29948	3.13858	1.84987	0.0897628	NA	0.552518	0.331246	1.70843	2.00847	0.394985	NA	0.897685	0.538181	1.87475	1.91974	0.328784	NA
FBgn0003449	snf	X	5309242	5310501	+	835	467.028	559.315	310.019	371.28	-0.582444	0.357206	0.102984	0.190376	312.662	374.445	-0.576523	0.360374	0.109645	0.174957	293.464	351.454	-0.661092	0.356927	0.0640009	0.581954
FBgn0003450	snk	3R	13040165	13042770	-	1435	0	0	0.98931	0.689415	2.04072	2.36155	0.387507	NA	1.08134	0.753545	2.46251	2.38505	0.301849	NA	0.241258	0.168124	-0.0224039	2.53277	0.992942	NA
FBgn0003459	stwl	3L	14402930	14409939	-	4334	487.682	112.525	473.96	109.359	-0.0481761	0.32655	0.882713	0.926174	276.765	63.859	-0.805845	0.331537	0.0150724	0.0324254	451.873	104.262	-0.117356	0.326341	0.719137	0.942567
FBgn0003460	so	2R	7419350	7434872	+	2786	0.328379	0.117868	0.776676	0.278778	0.713203	1.86411	0.702019	0.792692	4.12679	1.48126	2.83805	1.75492	0.105837	0.170018	1.36084	0.488455	1.50933	1.76475	0.392404	0.828418
FBgn0003462	Sod1	3L	11112281	11113740	-	735	989.014	1345.6	624.896	850.198	-0.660122	0.257367	0.0103204	0.0296267	541.581	736.845	-0.843331	0.260076	0.00118431	0.00341383	1088.44	1480.88	0.140647	0.256475	0.583428	0.903723
FBgn0003463	sog	X	15603283	15633434	-	6442	89.5158	13.8957	283.051	43.9384	1.68137	0.534081	0.00164302	0.00621548	565.25	87.7444	2.66483	0.534429	6.15392e-07	3.31368e-06	61.7027	9.57818	-0.516684	0.539301	0.338032	0.811449
FBgn0003464	sol	X	21350280	21357912	+	5724	420.344	73.4354	483.077	84.3951	0.19049	0.193203	0.324153	0.457772	536.062	93.6517	0.334616	0.196093	0.0879302	0.146179	456.92	79.8253	0.108587	0.19288	0.573453	0.90181
FBgn0003475	spir	2L	20311219	20348386	+	6505	730.135	112.242	1727	265.489	1.23583	0.277355	8.35943e-06	6.12056e-05	2869.13	441.066	1.96786	0.277598	1.35216e-12	1.56205e-11	964.213	148.226	0.394974	0.277648	0.154861	0.69272
FBgn0003479	spn-A	3R	30054696	30056037	-	1342	84.6012	63.0411	133.391	99.3972	0.620695	0.26016	0.0170408	0.044684	124.292	92.6169	0.586582	0.268366	0.0288335	0.0564883	112.179	83.5911	0.373389	0.260164	0.151229	0.69272
FBgn0003480	spn-B	3R	14328051	14329608	+	1384	12.3907	8.95279	5.23878	3.78525	-1.16687	0.578549	0.0437065	0.09608	4.27795	3.09101	-1.08451	0.618648	0.0795972	0.134423	11.9706	8.64926	0.0284987	0.518472	0.956165	0.992865
FBgn0003482	spn-D	3R	27165716	27167122	+	1026	9.32876	9.09236	22.8686	22.2891	1.17539	0.482966	0.0149458	0.0401675	14.5458	14.1772	0.765512	0.513599	0.136097	0.210167	13.2641	12.9279	0.401382	0.493982	0.41648	0.839794
FBgn0003483	spn-E	3R	15837419	15844415	+	4678	336.199	71.868	122.005	26.0805	-1.47436	0.235777	4.0213e-10	6.6583e-09	54.0968	11.5641	-2.67168	0.263138	3.20832e-24	1.13952e-22	321.757	68.7808	-0.0771596	0.229159	0.736337	0.946501
FBgn0003486	spo	3L	5590083	5592571	-	2489	0	0	0.483344	0.194192	1.04552	2.17672	0.631002	0.73774	7.92137	3.18255	4.82877	1.95465	0.0134962	0.0294704	0	0	0	2.24395	1	1
FBgn0003495	spz	3R	27064990	27070070	-	2364	393.443	166.431	531.632	224.887	0.443189	0.282745	0.11701	0.210437	1233.72	521.88	1.64912	0.282769	5.47504e-09	4.05126e-08	279	118.02	-0.486862	0.283856	0.0863138	0.632728
FBgn0003499	sr	3R	18090803	18135583	+	8113	1.02178	0.125944	390.988	48.1927	8.29389	0.884455	6.76185e-21	4.45022e-19	474.442	58.4792	8.55195	0.885178	4.40356e-22	1.32502e-20	3.37979	0.416589	1.4292	0.958879	0.136095	0.681736
FBgn0003502	Btk29A	2L	8258373	8301079	-	9022	826.065	91.5611	1158.04	128.357	0.482374	0.219932	0.0282866	0.0675611	973.227	107.873	0.242695	0.221784	0.273831	0.372385	1107.91	122.8	0.418469	0.219801	0.056929	0.565145
FBgn0003507	srp	3R	15986152	16004085	+	5668	4357.76	768.835	4472.37	789.056	0.0367405	0.34023	0.914006	0.946737	5940.2	1048.02	0.445245	0.340374	0.190837	0.278192	4270.72	753.478	-0.0298961	0.340208	0.929975	0.987237
FBgn0003510	Sry-alpha	3R	30039719	30043071	+	3300	0	0	0	0	NA	NA	NA	NA	0	0	NA	NA	NA	NA	0	0	NA	NA	NA	NA
FBgn0003511	Sry-beta	3R	30039719	30043071	+	3300	0	0	0	0	NA	NA	NA	NA	0	0	NA	NA	NA	NA	0	0	NA	NA	NA	NA
FBgn0003512	Sry-delta	3R	30043341	30044886	+	1546	146.486	94.7516	213.539	138.124	0.566404	0.265192	0.0326937	0.0761592	280.613	181.509	0.922356	0.268603	0.00059496	0.00184098	97.643	63.1585	-0.561706	0.269274	0.0369786	0.506801
FBgn0003513	ss	3R	16374434	16403690	-	5191	0.656758	0.126519	3.53197	0.680403	2.12394	1.2645	0.0930211	0.176512	10.2741	1.97921	3.4661	1.24853	0.00550085	0.0134761	0.911994	0.175687	0.126768	1.40109	0.927907	0.986687
FBgn0003514	sqh	X	6223061	6225140	-	1578	1061.67	672.795	1291.28	818.304	0.281853	0.122012	0.0208862	0.0529434	1385.72	878.152	0.397894	0.123805	0.00130955	0.00374269	990.871	627.928	-0.100082	0.122183	0.412721	0.837788
FBgn0003515	st	3L	16497651	16500460	+	2146	0	0	0	0	0	4.40736	1	NA	0	0	0	4.40736	1	NA	0.223579	0.104184	-0.0223957	4.40736	0.995946	NA
FBgn0003517	sta	X	1481797	1483413	-	1338	3424.36	2559.31	1631.46	1219.33	-1.06912	0.334504	0.00139291	0.00544243	2562.43	1915.12	-0.422707	0.334764	0.206696	0.297056	2781.93	2079.17	-0.299108	0.334247	0.370856	0.821574
FBgn0003520	stau	2R	18117896	18125779	-	5369	1408.09	262.264	2233.07	415.918	0.666535	0.230044	0.00376244	0.0125558	2164.2	403.092	0.613447	0.230815	0.00786657	0.0185106	995.549	185.425	-0.499161	0.230523	0.0303613	0.475555
FBgn0003525	stg	3R	29251826	29255800	-	3064	4561.68	1488.8	2298.6	750.194	-0.988512	0.399894	0.0134385	0.0368825	2357.63	769.463	-0.956824	0.400291	0.0168337	0.0355806	2788.23	909.998	-0.709873	0.399802	0.0758051	0.618081
FBgn0003527	stil	2R	12570367	12571883	+	1171	0	0	0.252983	0.21604	0.216791	4.40736	0.960769	NA	0	0	0	4.40736	1	NA	0.223579	0.19093	-0.022405	4.40736	0.995944	NA
FBgn0003545	sub	2R	17745500	17748078	-	2460	158.352	64.3707	204.287	83.0433	0.367286	0.174207	0.035002	0.0802971	136.437	55.4621	-0.131917	0.185846	0.477814	0.578783	182.376	74.1367	0.206524	0.173764	0.234626	0.746947
FBgn0003557	Su(dx)	2L	2037714	2044372	+	4798	869.86	181.296	4475.71	932.828	2.35867	0.193744	4.26554e-34	8.78023e-32	7870.36	1640.34	3.17135	0.193854	3.72607e-60	1.29796e-57	841.856	175.46	-0.0518935	0.194851	0.78999	0.956169
FBgn0003559	su(f)	X	23096771	23101431	+	3014	449.246	149.053	343.294	113.9	-0.393764	0.225818	0.0812066	0.158784	210.452	69.8248	-1.03889	0.233768	8.82617e-06	3.91281e-05	412.729	136.937	-0.128649	0.224746	0.56704	0.89994
FBgn0003567	su(Hw)	3R	14304455	14308589	-	3682	1040.29	282.533	820.232	222.768	-0.340514	0.178523	0.0564699	0.118132	550.641	149.55	-0.883056	0.182592	1.32325e-06	6.77513e-06	1097.8	298.154	0.0800564	0.17782	0.652559	0.922096
FBgn0003575	su(sable)	X	635890	643760	+	5047	437.936	86.7715	610.728	121.008	0.469335	0.203049	0.0208086	0.052776	833.412	165.13	0.911442	0.204528	8.3379e-06	3.71636e-05	413.866	82.0023	-0.0932476	0.203591	0.646942	0.919556
FBgn0003598	Su(var)3-7	3R	13264364	13270038	+	5051	622.066	123.157	551.308	109.148	-0.173337	0.109543	0.113567	0.205305	462.747	91.615	-0.413987	0.115035	0.000319685	0.00104678	564.876	111.834	-0.140902	0.10874	0.195053	0.724028
FBgn0003607	Su(var)205	2L	8209626	8211122	-	1109	3135.51	2827.33	2408.64	2171.9	-0.379391	0.190506	0.0464272	0.100886	1610.59	1452.29	-0.952699	0.191974	6.95399e-07	3.71358e-06	3204.36	2889.41	0.0327104	0.190284	0.863514	0.974468
FBgn0003612	Su(var)2-10	2R	9116122	9122000	+	5039	754.237	149.68	621.326	123.303	-0.28645	0.187073	0.125714	0.222555	576.221	114.352	-0.382323	0.190258	0.0444847	0.0821067	762.528	151.325	0.00848357	0.186324	0.963684	0.993938
FBgn0003638	su(w[a])	X	1012779	1046040	+	5658	872.974	154.29	835.415	147.652	-0.0687591	0.248127	0.781694	0.851251	799.294	141.268	-0.125752	0.24998	0.614929	0.704364	900.668	159.185	0.0394867	0.247834	0.873411	0.975939
FBgn0003651	svp	3R	12258737	12302785	+	5595	0	0	0	0	NA	NA	NA	NA	0	0	NA	NA	NA	NA	0	0	NA	NA	NA	NA
FBgn0003654	sw	X	20227961	20236382	-	3304	292.995	88.6788	473.101	143.19	0.71282	0.179549	7.18538e-05	0.000408525	712.68	215.702	1.30309	0.181054	6.1451e-13	7.38146e-12	248.274	75.1436	-0.21841	0.181511	0.228866	0.742557
FBgn0003655	swa	X	6363418	6365708	-	2022	20.4425	10.1101	9.75897	4.82639	-1.05811	0.402592	0.00858292	0.0253985	9.34389	4.62111	-1.05978	0.43634	0.0151495	0.0325711	18.7924	9.29398	-0.106885	0.361167	0.767274	0.95374
FBgn0003656	sws	X	7956820	7968236	-	5963	855.007	143.385	1289.75	216.292	0.596907	0.124539	1.64369e-06	1.42595e-05	2400.82	402.619	1.48477	0.124927	1.41575e-32	9.569e-31	809.113	135.689	-0.0761991	0.125128	0.542546	0.891143
FBgn0003660	Syb	2R	10249435	10252417	-	1237	9557.06	7726	9200.91	7438.08	-0.0547787	0.292721	0.851554	0.903317	6488.66	5245.48	-0.556609	0.292964	0.0574433	0.102012	10307.7	8332.83	0.109125	0.292696	0.709277	0.938704
FBgn0003676	CCT1	3R	22489105	22491439	-	1980	1715.23	866.279	912.768	460.994	-0.906438	0.164239	3.40896e-08	4.0894e-07	755.705	381.669	-1.1802	0.167279	1.72235e-12	1.96961e-11	1471.93	743.401	-0.216837	0.163353	0.184371	0.714075
FBgn0003683	term	3L	18592303	18593771	-	1469	0	0	0	0	NA	NA	NA	NA	0	0	NA	NA	NA	NA	0	0	NA	NA	NA	NA
FBgn0003687	Tbp	2R	21686192	21687642	-	1387	268.479	193.568	448.665	323.479	0.748712	0.217376	0.0005725	0.00252687	411.381	296.598	0.658704	0.221118	0.00289216	0.00763423	272.531	196.49	0.0303836	0.218467	0.88939	0.979727
FBgn0003701	thr	2R	17861273	17865963	-	4578	177.617	38.798	195.192	42.637	0.116186	0.210285	0.580592	0.697126	117.839	25.7404	-0.599131	0.223893	0.00745139	0.0176345	184.098	40.2136	0.0297123	0.209577	0.887259	0.979727
FBgn0003710	tipE	3L	4188499	4193788	+	4084	0.328379	0.0804063	1.99635	0.488822	2.09848	1.57228	0.181983	0.295592	1.81532	0.444496	2.26875	1.61444	0.159936	0.240342	1.15494	0.282796	1.25519	1.61614	0.437361	NA
FBgn0003714	tko	X	2442313	2443976	-	1596	111.669	69.9678	52.2734	32.7527	-1.06846	0.308377	0.000530655	0.00236585	57.1835	35.8293	-0.916114	0.320172	0.00421889	0.0106466	84.6372	53.0308	-0.366739	0.299986	0.221512	0.732864
FBgn0003716	tkv	2L	5219000	5271384	-	4433	105.306	23.755	300.507	67.7887	1.47536	0.190823	1.06233e-14	3.36417e-13	506.616	114.283	2.20559	0.192201	1.75272e-30	1.01759e-28	178.229	40.205	0.720896	0.192844	0.000185323	0.0332114
FBgn0003719	tld	3R	24749731	24753510	+	3359	0	0	0.315954	0.094062	0.2168	4.40736	0.960767	NA	0	0	0	4.40736	1	NA	0	0	0	4.40736	1	NA
FBgn0003720	tll	3R	30852315	30854400	+	1965	0.365022	0.185762	0	0	-1.70674	4.40736	0.698573	NA	0	0	-0.913748	4.40736	0.835757	NA	0.223579	0.11378	-0.984146	4.40736	0.823305	NA
FBgn0003721	Tm1	3R	15278220	15308779	+	9463	4877.62	515.441	5011.62	529.602	0.0396878	0.258474	0.877968	0.922611	6691.94	707.169	0.454528	0.258641	0.0788545	0.133368	4437.57	468.939	-0.135815	0.258464	0.599257	0.906414
FBgn0003731	Egfr	2R	21522420	21559977	+	6947	213.931	30.7948	681.816	98.1454	1.65193	0.297946	2.94989e-08	3.60069e-07	1249.27	179.829	2.52459	0.298325	2.61587e-17	5.44643e-16	368.642	53.0649	0.764539	0.298704	0.0104817	0.310461
FBgn0003733	tor	2R	7705183	7709184	-	3131	0.723128	0.230958	0	0	-1.70678	2.49632	0.494154	NA	1.08134	0.345365	1.503	2.34567	0.521684	NA	0.929673	0.296925	0.954114	2.31298	0.67997	NA
FBgn0003741	tra	3L	16590059	16591050	-	862	101.066	117.246	90.0193	104.431	-0.186059	0.545463	0.733027	0.817666	63.131	73.2379	-0.646661	0.556724	0.24542	0.341387	152.085	176.432	0.570333	0.542625	0.29323	0.789018
FBgn0003742	tra2	2R	14602004	14604337	-	1844	85.4839	46.3579	94.9205	51.4753	0.130118	0.277114	0.638679	0.743703	75.5752	40.9844	-0.108778	0.289978	0.707568	0.782281	136.98	74.2839	0.655258	0.272742	0.0162842	0.377181
FBgn0003744	trc	3L	19830864	19834304	-	2816	870.542	309.141	1125.08	399.532	0.373282	0.164396	0.0231699	0.0575876	1533.13	544.434	0.80824	0.165422	1.02949e-06	5.38342e-06	822.474	292.072	-0.0794909	0.164624	0.629193	0.917
FBgn0003747	Gr5a	X	5680617	5682488	+	1490	0.365022	0.244981	0.776676	0.521259	0.708758	3.04809	0.81613	NA	0.25256	0.169504	0.0292751	3.12966	0.992537	NA	0	0	-1.94597	3.1571	0.537645	NA
FBgn0003748	Treh	2R	21074018	21088945	+	4369	339.881	77.7937	517.677	118.489	0.590201	0.188954	0.00178701	0.00669629	1121.08	256.599	1.69864	0.189109	2.65039e-19	6.48772e-18	400.574	91.6854	0.219654	0.189204	0.245669	0.754596
FBgn0003751	trk	2L	10271443	10272324	-	882	8.85728	10.0423	5.0703	5.74863	-0.74009	0.732188	0.312115	0.4451	7.08599	8.034	-0.52742	0.765425	0.490789	0.591114	10.9183	12.3791	0.412992	0.68317	0.545496	0.892594
FBgn0003861	trp	3R	29914521	29920289	-	4149	0	0	0.252983	0.0609744	0.2168	4.40736	0.960767	NA	0	0	0	4.40736	1	NA	0	0	0	4.40736	1	NA
FBgn0003862	trx	3R	14263358	14286903	-	14052	1711.32	121.785	2379.29	169.32	0.473212	0.309418	0.126175	0.223196	2152.6	153.188	0.328251	0.310023	0.289692	0.389568	1657.9	117.983	-0.0481397	0.309496	0.876394	0.976623
FBgn0003863	alphaTry	2R	11344260	11345119	-	860	0	0	0	0	NA	NA	NA	NA	0	0	NA	NA	NA	NA	0	0	NA	NA	NA	NA
FBgn0003865	tsg	X	11988062	11988948	-	887	0	0	0	0	NA	NA	NA	NA	0	0	NA	NA	NA	NA	0	0	NA	NA	NA	NA
FBgn0003866	tsh	2L	21828593	21837011	+	4732	2713.76	573.49	1374.72	290.515	-0.981406	0.126333	7.94921e-15	2.56213e-13	878.284	185.605	-1.60723	0.129953	3.90179e-35	3.15522e-33	2102.36	444.286	-0.369279	0.125615	0.00328458	0.18836
FBgn0003867	tsl	3R	21778114	21782536	-	2059	0.328379	0.159485	0	0	-1.70677	2.67113	0.522842	NA	0.528819	0.256833	0.718258	2.57824	0.780564	NA	0.654742	0.31799	0.469681	2.54066	0.853334	NA
FBgn0003870	ttk	3R	31713867	31735392	+	7557	3373.06	446.349	4056.53	536.791	0.264993	0.26372	0.314981	0.448199	4397.79	581.95	0.38022	0.264027	0.149844	0.227861	3816.62	505.044	0.176928	0.263693	0.502245	0.874558
FBgn0003882	tub	3R	4387742	4389813	+	2006	276.979	138.075	152.446	75.9952	-0.861133	0.246093	0.000466618	0.00211202	78.5842	39.1746	-1.67732	0.262814	1.74589e-10	1.57652e-09	235.544	117.42	-0.232122	0.242711	0.338883	0.811967
FBgn0003884	alphaTub84B	3R	7086599	7088839	+	1752	9186.83	5243.62	5802.62	3312	-0.662616	0.4905	0.176727	0.289077	12130.8	6923.98	0.400603	0.490513	0.414099	0.518454	5756.78	3285.84	-0.674048	0.490485	0.169365	0.702081
FBgn0003885	alphaTub84D	3R	7530753	7532732	+	1980	877.654	443.26	580.083	292.971	-0.590148	0.200148	0.0031926	0.0108991	596.403	301.214	-0.558398	0.202927	0.00592836	0.0144182	742.727	375.115	-0.233687	0.199329	0.24105	0.752671
FBgn0003886	alphaTub85E	3R	9731221	9733250	-	1560	0.693401	0.444488	3.57722	2.29309	2.12576	1.35215	0.115921	0.208871	4.60821	2.95398	2.18859	1.38991	0.115341	0.182503	0	0	-2.74399	1.75018	0.11692	0.668083
FBgn0003888	betaTub60D	2R	24305881	24313099	+	2518	5912.94	2348.27	13878.4	5511.69	1.23003	0.165769	1.16972e-13	3.17191e-12	21818.3	8664.93	1.8834	0.16583	6.81177e-30	3.9047e-28	5627.63	2234.96	-0.0722097	0.165898	0.66337	0.923896
FBgn0003889	betaTub85D	3R	9408383	9410282	-	1841	0	0	0.758949	0.412248	1.65199	2.57945	0.521886	NA	0.505121	0.274373	1.64433	2.61692	0.529779	NA	0.672421	0.365248	1.45993	2.57448	0.570661	NA
FBgn0003890	betaTub97EF	3R	27967008	27988384	-	1869	28.9099	15.4681	26.2305	14.0345	-0.169787	0.355452	0.63289	0.739081	35.4437	18.964	0.384806	0.361732	0.287425	0.387152	37.2498	19.9303	0.33384	0.343373	0.330933	0.807108
FBgn0003891	tud	2R	21183322	21192913	+	8830	8221.08	931.04	5863.01	663.987	-0.48826	0.229785	0.0335984	0.0778027	3149.65	356.699	-1.38451	0.230479	1.88881e-09	1.49667e-08	8007.91	906.898	-0.0385462	0.229706	0.866735	0.974468
FBgn0003892	ptc	2R	8649649	8665223	+	5521	1.75182	0.317302	4.66985	0.845834	1.20379	0.897064	0.17962	0.292835	9.99162	1.80975	2.47275	0.879991	0.00495455	0.0122873	2.4821	0.449574	0.275708	0.936108	0.768356	0.95374
FBgn0003896	tup	2L	18859507	18881261	-	3314	2320.12	700.097	3373.99	1018.1	0.53826	0.283618	0.057718	0.120366	3607.8	1088.65	0.634661	0.283969	0.0254196	0.0507887	3861.69	1165.27	0.733066	0.283541	0.00972679	0.303152
FBgn0003900	twi	2R	22985374	23048325	+	2388	0	0	1.28264	0.53712	2.40746	1.66889	0.149147	0.254708	3.44918	1.44438	4.06741	1.61622	0.0118489	0.0263545	0.448843	0.187958	0.872535	1.84431	0.636145	NA
FBgn0003916	snRNA:U1:21D	2L	901491	901654	-	164	0	0	0	0	0	4.40736	1	NA	0	0	0	4.40736	1	NA	0.223579	1.36328	-0.0223957	4.40736	0.995946	NA
FBgn0003920	snRNA:U2:14B	X	16254672	16254863	+	192	0	0	0	0	NA	NA	NA	NA	0	0	NA	NA	NA	NA	0	0	NA	NA	NA	NA
FBgn0003922	snRNA:U2:38ABa	2L	19815614	19815805	-	192	0	0	0	0	NA	NA	NA	NA	0	0	NA	NA	NA	NA	0	0	NA	NA	NA	NA
FBgn0003923	snRNA:U2:38ABb	2L	19812646	19812836	+	191	0	0	0	0	NA	NA	NA	NA	0	0	NA	NA	NA	NA	0	0	NA	NA	NA	NA
FBgn0003926	snRNA:U3	2L	1432711	1432921	+	211	0	0	0	0	NA	NA	NA	NA	0	0	NA	NA	NA	NA	0	0	NA	NA	NA	NA
FBgn0003930	snRNA:U4:39B	2L	21215036	21215178	-	143	0.985137	6.88907	0.713705	4.99095	-0.561733	2.18577	0.797182	0.862099	1.37275	9.59962	-0.969559	2.26707	0.668891	0.750979	0.706095	4.93773	-0.64668	2.168	0.765486	NA
FBgn0003931	snRNA:U4:38AB	2L	19810734	19810875	+	142	0	0	0.315954	2.22503	0.2168	4.40736	0.960767	NA	0	0	0	4.40736	1	NA	0	0	0	4.40736	1	NA
FBgn0003933	snRNA:U5:14B	X	16254008	16254117	-	110	0	0	0	0	NA	NA	NA	NA	0	0	NA	NA	NA	NA	0	0	NA	NA	NA	NA
FBgn0003934	snRNA:U5:23D	2L	3048701	3048831	+	131	0	0	0	0	NA	NA	NA	NA	0	0	NA	NA	NA	NA	0	0	NA	NA	NA	NA
FBgn0003935	snRNA:U5:34A	2L	13244848	13244974	+	127	0	0	0	0	0	4.40736	1	NA	2.74549	21.618	3.39292	4.30487	0.430604	NA	0	0	0	4.40736	1	NA
FBgn0003936	snRNA:U5:35D	2L	15751557	15751682	-	126	0	0	0	0	NA	NA	NA	NA	0	0	NA	NA	NA	NA	0	0	NA	NA	NA	NA
FBgn0003938	snRNA:U5:63BC	3L	3090801	3090923	+	123	0	0	0	0	0	4.40736	1	NA	0.25256	2.05334	0.992539	4.38784	0.821044	NA	0	0	0	4.40736	1	NA
FBgn0003941	RpL40	2L	4227699	4228561	+	659	10909.1	16554.1	4689.61	7116.25	-1.21769	0.368478	0.00095096	0.00394	6298.97	9558.37	-0.79341	0.368601	0.0313589	0.0608045	8472.35	12856.4	-0.364383	0.368392	0.322606	0.805768
FBgn0003942	RpS27A	2L	10408352	10410456	+	592	7936.99	13407.1	2756.89	4656.91	-1.5252	0.484497	0.00164394	0.00621548	3834.56	6477.3	-1.05078	0.484644	0.0301473	0.0587066	5040.44	8514.25	-0.654666	0.484385	0.176522	0.707755
FBgn0003943	Ubi-p63E	3L	3899259	3903184	-	3138	2687.38	856.398	2104.65	670.699	-0.351787	0.281302	0.211093	0.331979	2806.09	894.229	0.0578447	0.281665	0.837286	0.884762	1836.33	585.19	-0.548638	0.281285	0.0511202	0.556628
FBgn0003944	Ubx	3R	16656623	16734426	-	4282	0	0	0	0	NA	NA	NA	NA	0	0	NA	NA	NA	NA	0	0	NA	NA	NA	NA
FBgn0003950	unc	X	21111414	21116914	-	4775	55.7908	11.6839	25.0198	5.23976	-1.16081	0.287078	5.26509e-05	0.000311672	17.986	3.76671	-1.52433	0.322433	2.27193e-06	1.11892e-05	56.9846	11.9339	0.0168574	0.262273	0.948752	0.99043
FBgn0003961	Uro	2L	7780085	7781415	+	1262	1.78155	1.41169	1.13787	0.901644	-0.656787	1.46028	0.652877	0.755572	1.05764	0.838066	-0.319762	1.49069	0.830153	0.878866	0.207585	0.164489	-2.84273	1.73709	0.101738	NA
FBgn0003963	ush	2L	476220	540560	+	6706	1076.34	160.503	723.867	107.943	-0.575445	0.339747	0.0903134	0.172494	639.495	95.3616	-0.756125	0.341583	0.026857	0.0531564	1322.18	197.163	0.2934	0.339138	0.386966	0.826511
FBgn0003964	usp	X	2038798	2042311	-	3038	750.711	247.107	1635.5	538.348	1.12789	0.29567	0.000136353	0.000715499	2306.66	759.269	1.6186	0.296059	4.57327e-08	2.95436e-07	614.55	202.288	-0.284183	0.296379	0.337635	0.811204
FBgn0003965	v	X	10923972	10925631	+	1305	0	0	0.315954	0.24211	0.2168	4.40736	0.960767	NA	0	0	0	4.40736	1	NA	0	0	0	4.40736	1	NA
FBgn0003969	vap	X	15999951	16005812	-	4457	1031.29	231.386	2003.52	449.523	0.953376	0.240612	7.423e-05	0.000420188	2067.47	463.871	1.00133	0.24134	3.3383e-05	0.000132901	1077.3	241.71	0.0583156	0.240936	0.808751	0.961293
FBgn0003975	vg	2R	12884632	12899385	+	3463	1.05842	0.305638	0	0	-2.99078	2.11139	0.156629	NA	0.276259	0.0797745	-1.21797	2.06437	0.555195	NA	0.913679	0.26384	-0.352533	1.89315	0.852276	NA
FBgn0003977	vir	2R	23360192	23366355	-	5867	377.339	64.3156	443.325	75.5624	0.223302	0.165324	0.176794	0.289134	650.738	110.915	0.756455	0.167177	6.04312e-06	2.77127e-05	279.658	47.6662	-0.443438	0.166591	0.00777167	0.275111
FBgn0003978	vls	2L	20064261	20065679	-	1310	75.3284	57.5026	74.2691	56.6939	0.00463032	0.294868	0.987471	0.992843	57.0367	43.5394	-0.265502	0.310322	0.392236	0.496434	66.0498	50.4197	-0.161882	0.294194	0.582143	0.903723
FBgn0003979	Vm26Aa	2L	5959596	5960340	-	745	0	0	0	0	0	4.40736	1	NA	0.276259	0.370818	1.0622	4.3837	0.808543	NA	0	0	0	4.40736	1	NA
FBgn0003980	Vm26Ab	2L	5957004	5957639	+	636	0	0	0	0	NA	NA	NA	NA	0	0	NA	NA	NA	NA	0	0	NA	NA	NA	NA
FBgn0003983	Vm34Ca	2L	13411141	13411631	-	491	0	0	0	0	NA	NA	NA	NA	0	0	NA	NA	NA	NA	0	0	NA	NA	NA	NA
FBgn0003984	vn	3L	5813338	5845664	-	5239	56.1523	10.7181	37.8211	7.21914	-0.611161	0.312027	0.05015	0.10726	52.6572	10.051	-0.283932	0.322159	0.378134	0.481411	54.2772	10.3602	-0.0843351	0.302185	0.78018	0.955423
FBgn0003996	w	X	2790599	2796466	-	2352	0	0	0	0	NA	NA	NA	NA	0	0	NA	NA	NA	NA	0	0	NA	NA	NA	NA
FBgn0003997	hid	3L	18167745	18185641	-	4018	52.1648	12.9828	161.429	40.1765	1.60522	0.475111	0.000728487	0.00312994	539.724	134.326	3.32894	0.474059	2.18415e-12	2.47273e-11	48.4458	12.0572	-0.131757	0.481591	0.784402	0.955534
FBgn0004003	wbl	2R	19249395	19250917	+	1319	0	0	0.505966	0.383598	1.05897	4.37319	0.808664	NA	0	0	0	4.40736	1	NA	0.241258	0.18291	-0.0224132	4.40736	0.995942	NA
FBgn0004034	y	X	356509	361245	+	2038	18.137	8.8994	6.41701	3.14868	-1.46116	0.52687	0.00554944	0.0175371	0.805078	0.395034	-3.97784	0.911901	1.28799e-05	5.56286e-05	9.13897	4.48428	-0.932899	0.49188	0.0578811	0.565145
FBgn0004045	Yp1	X	10053811	10055498	+	1611	0	0	0	0	NA	NA	NA	NA	0	0	NA	NA	NA	NA	0	0	NA	NA	NA	NA
FBgn0004047	Yp3	X	13759546	13761547	+	1868	2.47495	1.32492	0.546315	0.29246	-2.23779	1.53172	0.144025	0.247568	0.757681	0.405611	-1.22816	1.41786	0.386377	0.490389	0.672421	0.359969	-1.89669	1.41623	0.180489	NA
FBgn0004049	yrt	3R	13428867	13434984	-	4464	524.693	117.539	924.1	207.012	0.807476	0.26432	0.00225122	0.00813946	1294.39	289.963	1.2945	0.265073	1.04181e-06	5.4353e-06	705.484	158.039	0.417923	0.264436	0.114008	0.667141
FBgn0004050	z	X	2447769	2450550	+	2599	460.905	177.339	434.074	167.016	-0.0720768	0.180508	0.689672	0.783242	521.329	200.588	0.187378	0.183332	0.306747	0.4085	410.972	158.127	-0.151703	0.180119	0.399654	0.832403
FBgn0004052	Z600	3L	15509061	15509513	+	453	0.328379	0.724899	0.230361	0.508523	-0.74495	4.40736	0.865778	NA	0	0	-0.913748	4.40736	0.835757	NA	0	0	-1.94593	4.40736	0.658837	NA
FBgn0004053	zen	3R	6752864	6754194	-	1267	0	0	0	0	NA	NA	NA	NA	0	0	NA	NA	NA	NA	0	0	NA	NA	NA	NA
FBgn0004054	zen2	3R	6743135	6744136	-	1002	0	0	0	0	NA	NA	NA	NA	0	0	NA	NA	NA	NA	0	0	NA	NA	NA	NA
FBgn0004055	uzip	2R	25012062	25031737	+	4114	588.542	143.058	447.454	108.764	-0.40166	0.143298	0.00506347	0.0162278	425.148	103.342	-0.451541	0.147937	0.00227132	0.00613522	751.852	182.755	0.345544	0.141137	0.0143533	0.36421
FBgn0004057	Zw	X	19667252	19672353	+	2512	303.118	120.668	535.651	213.237	0.810489	0.25541	0.00150726	0.00581896	437.317	174.091	0.544071	0.258831	0.0355503	0.0676427	412.285	164.126	0.433428	0.255599	0.089936	0.638734
FBgn0004066	Prosalpha4	X	16276270	16277587	+	1176	3022.11	2569.82	2828.26	2404.98	-0.0954109	0.221872	0.667176	0.766343	2144.46	1823.52	-0.487365	0.222785	0.0286987	0.0562849	3381.33	2875.28	0.162463	0.221741	0.463758	0.854229
FBgn0004087	Dhfr	3R	16481167	16481878	+	662	255.156	385.433	208.34	314.713	-0.277332	0.217652	0.202593	0.321579	175.602	265.26	-0.482704	0.225589	0.032375	0.0624139	284.522	429.792	0.174983	0.215292	0.416349	0.839763
FBgn0004101	bs	2R	24342861	24376473	+	4791	215.909	45.0656	386.447	80.6611	0.823388	0.181965	6.03989e-06	4.58536e-05	457.408	95.4723	1.09683	0.184943	3.0173e-09	2.32774e-08	224.007	46.7557	0.036645	0.183739	0.841919	0.967948
FBgn0004102	oc	X	8630159	8650681	-	5041	0	0	0.568937	0.112862	1.20607	4.09804	0.768526	NA	0.552518	0.109605	1.71849	4.08873	0.674266	NA	0	0	0	4.14722	1	NA
FBgn0004103	Pp1-87B	3R	12423621	12425917	-	2203	13104.4	5948.42	10123	4595.1	-0.371953	0.194459	0.0557788	0.116996	10320.6	4684.8	-0.344974	0.194645	0.0763412	0.129723	9723.33	4413.68	-0.430049	0.194441	0.0269862	0.462606
FBgn0004106	Cdk1	2L	10384739	10386262	-	1082	186.886	172.723	193.029	178.4	0.0481339	0.154293	0.755067	0.833879	164.63	152.154	-0.148711	0.163507	0.363083	0.466843	224.295	207.296	0.266319	0.151731	0.0792257	0.622706
FBgn0004107	Cdk2	3R	20735623	20738414	+	2299	199.34	86.7073	124.515	54.1605	-0.701425	0.262662	0.00757514	0.0228085	86.2747	37.5271	-1.17634	0.276599	2.11045e-05	8.69231e-05	269.527	117.236	0.413552	0.257441	0.108188	0.657872
FBgn0004108	Nrt	3L	16766072	16777465	+	4281	640.107	149.523	1276.2	298.108	0.985545	0.135852	4.02936e-13	1.01091e-11	1913.73	447.03	1.56946	0.136662	1.58361e-30	9.37433e-29	733.536	171.347	0.185983	0.136593	0.173328	0.704569
FBgn0004110	tin	3R	21378977	21381970	+	1664	1.3868	0.833415	1.09263	0.656629	-0.548188	1.46381	0.708037	0.797443	0.25256	0.151779	-1.68823	1.68493	0.316364	0.418392	1.57011	0.943574	0.00561556	1.38752	0.996771	NA
FBgn0004117	Tm2	3R	15310193	15315197	+	2613	1.41653	0.542108	0	0	-3.22722	2.42044	0.182428	NA	0.25256	0.0966553	-1.49247	2.38432	0.531347	NA	0.447157	0.171128	-1.60899	2.34786	0.493154	NA
FBgn0004118	nAChRbeta2	3R	24509228	24515106	-	4018	37.8177	9.41206	19.4749	4.84691	-1.00546	0.4988	0.0438258	0.0962954	9.85756	2.45335	-1.8082	0.55233	0.00106122	0.00309548	48.6468	12.1072	0.307561	0.479772	0.521486	0.881342
FBgn0004132	boca	2R	7565873	7566738	-	704	213.892	303.825	88.2018	125.287	-1.26115	0.250848	4.96829e-07	4.787e-06	105.638	150.054	-1.00102	0.258536	0.000108001	0.00038816	222.399	315.907	0.0770952	0.242364	0.750411	0.948714
FBgn0004133	blow	2R	7580488	7587079	-	2848	909.951	319.505	1650.68	579.591	0.867379	0.157856	3.91305e-08	4.62366e-07	2181.69	766.043	1.26829	0.158646	1.30166e-15	2.17913e-14	861.698	302.563	-0.0703332	0.158506	0.657241	0.922433
FBgn0004143	nullo	X	7049476	7050321	+	846	0	0	0	0	NA	NA	NA	NA	0	0	NA	NA	NA	NA	0	0	NA	NA	NA	NA
FBgn0004167	kst	3L	3336860	3368133	+	14454	12127	839.005	10368	717.31	-0.226457	0.257192	0.378589	0.514153	9038.59	625.335	-0.424366	0.257371	0.0991784	0.161007	8587.7	594.14	-0.498284	0.257194	0.0526979	0.56061
FBgn0004168	5-HT1A	2R	19067155	19121958	+	5019	0	0	0.483344	0.0963029	1.02975	2.54335	0.685566	NA	1.03394	0.206005	2.41653	2.45756	0.325459	NA	0.482516	0.0961379	0.945605	2.52076	0.707566	NA
FBgn0004169	up	X	13593474	13602578	-	2530	0.723128	0.285821	0	0	-1.70673	4.40736	0.698575	NA	0	0	-0.913739	4.40736	0.835759	NA	0	0	-1.94592	4.40736	0.658839	NA
FBgn0004170	sc	X	396060	397497	+	1438	0	0	0.315954	0.219718	0.2168	4.40736	0.960767	NA	0	0	0	4.40736	1	NA	0	0	0	4.40736	1	NA
FBgn0004171	Mst98Cb	3R	28292798	28293863	+	1066	0	0	0	0	0	4.40736	1	NA	0	0	0	4.40736	1	NA	0.207585	0.194732	-0.0223957	4.40736	0.995946	NA
FBgn0004172	Mst84Da	3R	7365850	7366262	+	358	0	0	0	0	NA	NA	NA	NA	0	0	NA	NA	NA	NA	0	0	NA	NA	NA	NA
FBgn0004173	Mst84Db	3R	7365160	7365627	-	415	0	0	0	0	0	4.40736	1	NA	0	0	0	4.40736	1	NA	0.448843	1.08155	0.876976	4.36772	0.840866	NA
FBgn0004174	Mst84Dc	3R	7364254	7364673	-	363	0	0	0	0	NA	NA	NA	NA	0	0	NA	NA	NA	NA	0	0	NA	NA	NA	NA
FBgn0004175	Mst84Dd	3R	7363307	7363773	-	415	0	0	0.315954	0.761335	0.2168	4.40736	0.960767	NA	0	0	0	4.40736	1	NA	0	0	0	4.40736	1	NA
FBgn0004177	mts	2L	7827650	7833576	+	3102	24511.7	7901.9	15816.8	5098.91	-0.631895	0.45398	0.163953	0.274122	23242.2	7492.66	-0.0769141	0.454004	0.865472	0.906919	14026.1	4521.62	-0.805235	0.453978	0.0761074	0.618785
FBgn0004179	Csp	3L	22267382	22273745	+	3081	1154.25	374.636	1252.45	406.508	0.115142	0.185231	0.534197	0.657903	1280.21	415.518	0.157599	0.186685	0.398561	0.502893	1334.44	433.118	0.206356	0.18498	0.264611	0.76804
FBgn0004181	Ebp	2R	25175126	25176715	-	1529	0	0	0	0	NA	NA	NA	NA	0	0	NA	NA	NA	NA	0	0	NA	NA	NA	NA
FBgn0004183	snRNA:U1:82Eb	3R	4947933	4948096	-	164	0	0	0	0	NA	NA	NA	NA	0	0	NA	NA	NA	NA	0	0	NA	NA	NA	NA
FBgn0004185	snRNA:U1:95Ca	3R	23859467	23859630	-	164	0	0	0	0	NA	NA	NA	NA	0	0	NA	NA	NA	NA	0	0	NA	NA	NA	NA
FBgn0004186	snRNA:U1:95Cb	3R	23827870	23828033	+	164	0	0	0	0	NA	NA	NA	NA	0	0	NA	NA	NA	NA	0	0	NA	NA	NA	NA
FBgn0004187	snRNA:U1:95Cc	3R	23826334	23826497	+	164	0	0	0	0	NA	NA	NA	NA	0	0	NA	NA	NA	NA	0	0	NA	NA	NA	NA
FBgn0004188	snRNA:U6:96Aa	3R	24556088	24556194	+	107	1.05842	9.89181	0.315954	2.95284	-2.00001	2.43253	0.410966	NA	0	0	-2.16881	2.43253	0.372614	NA	0.706095	6.59902	-0.704925	2.28009	0.757195	NA
FBgn0004189	snRNA:U6:96Ab	3R	24556692	24556798	+	107	0	0	0	0	NA	NA	NA	NA	0	0	NA	NA	NA	NA	0	0	NA	NA	NA	NA
FBgn0004190	snRNA:U6:96Ac	3R	24557215	24557321	+	107	0	0	0	0	NA	NA	NA	NA	0	0	NA	NA	NA	NA	0	0	NA	NA	NA	NA
FBgn0004191	snRNA:U2:34ABa	2L	13211925	13212116	-	192	0	0	1.26002	6.56261	2.37728	2.38522	0.318926	NA	0	0	0	2.57707	1	NA	0.448843	2.33772	0.874907	2.50878	0.727286	NA
FBgn0004192	snRNA:U2:34ABb	2L	13215839	13216030	+	192	0	0	0	0	NA	NA	NA	NA	0	0	NA	NA	NA	NA	0	0	NA	NA	NA	NA
FBgn0004197	Ser	3R	27172090	27194267	-	5831	13.1974	2.26332	11.2407	1.92774	-0.319079	0.532206	0.548812	0.671157	3.99314	0.684813	-1.83392	0.666312	0.00591705	0.0143984	15.3201	2.62735	0.11686	0.514826	0.820433	0.962931
FBgn0004198	ct	X	7608428	7678859	+	12443	4973.71	399.72	3551.66	285.435	-0.485539	0.43571	0.265123	0.393966	8304.12	667.373	0.738462	0.435713	0.0901067	0.148868	2752.76	221.23	-0.853181	0.435725	0.0502218	0.553148
FBgn0004227	nonA	X	16361569	16371547	+	8029	1204.05	149.962	510.171	63.5411	-1.24337	0.158668	4.6403e-15	1.51177e-13	368.632	45.9126	-1.72342	0.164885	1.43123e-25	5.68535e-24	1023.59	127.486	-0.239203	0.156672	0.126818	0.670486
FBgn0004228	mex1	3L	15517424	15519592	-	1219	1.02178	0.838212	0.776676	0.637142	-0.574372	1.6909	0.734095	NA	0.528819	0.433814	-0.567519	1.74013	0.744322	NA	0.448843	0.368206	-1.37637	1.7875	0.441301	NA
FBgn0004237	Hrb87F	3R	13656846	13660531	-	2759	10694.6	3876.25	5203.72	1886.09	-1.03881	0.280815	0.000216206	0.00108426	3458	1253.35	-1.6298	0.2813	6.88093e-09	5.02991e-08	7752.53	2809.91	-0.463662	0.280732	0.0986126	0.642855
FBgn0004240	DptA	2R	18865765	18866260	+	496	0	0	0	0	NA	NA	NA	NA	0	0	NA	NA	NA	NA	0	0	NA	NA	NA	NA
FBgn0004242	Syt1	2L	2772327	2799979	-	7190	0.328379	0.0456716	1.02966	0.143207	1.12468	1.80139	0.532405	NA	0.528819	0.0735493	0.720149	1.89407	0.703787	NA	1.0859	0.15103	1.2072	1.77166	0.49562	NA
FBgn0004244	Rdl	3L	9145838	9182149	-	8994	0.723128	0.0804012	0	0	-1.70675	4.40736	0.698571	NA	0	0	-0.913758	4.40736	0.835756	NA	0.482516	0.0536487	0.00910307	4.36022	0.998334	NA
FBgn0004359	T48	3R	26881734	26910997	+	2449	1.70827	0.697536	40.3498	16.476	4.58617	0.779902	4.09148e-09	5.82651e-08	71.8738	29.3482	5.34432	0.78106	7.78799e-12	8.25947e-11	6.89644	2.81602	2.04672	0.813529	0.0118743	0.338309
FBgn0004360	Wnt2	2R	9494166	9503188	+	2240	0.328379	0.146598	0.862269	0.384942	0.777153	1.74018	0.655169	0.757319	4.79822	2.14206	3.36959	1.60296	0.0355445	0.0676427	0.415169	0.185343	-0.123528	1.84952	0.946749	0.989907
FBgn0004362	HmgD	2R	21701458	21716727	+	1965	27153.4	13818.5	20651.9	10509.9	-0.394663	0.243643	0.105266	0.193465	14790.9	7527.19	-0.875995	0.24377	0.000326235	0.00106476	24865.1	12654	-0.126797	0.243626	0.602744	0.906596
FBgn0004363	porin	2L	10847227	10850848	-	2858	15221.9	5326.08	4379.28	1532.29	-1.79716	0.326689	3.77334e-08	4.47905e-07	3788.2	1325.47	-2.00815	0.327027	8.21979e-10	6.82371e-09	10974.5	3839.92	-0.471718	0.32656	0.148597	0.69272
FBgn0004364	18w	2R	20111511	20116932	+	5422	587.078	108.277	399.68	73.7145	-0.557387	0.349437	0.110689	0.201142	725.516	133.81	0.284976	0.350033	0.415565	0.51993	665.017	122.652	0.176752	0.348455	0.611983	0.911406
FBgn0004367	mei-41	X	16391698	16399850	+	7899	58.6688	7.42737	34.9511	4.42475	-0.792019	0.340001	0.0198348	0.0507039	30.9582	3.91925	-1.04156	0.364066	0.00422433	0.0106573	50.9272	6.4473	-0.253795	0.330183	0.442101	0.85042
FBgn0004368	Ptp4E	X	4939128	4955916	+	7229	255.689	35.3699	359.299	49.7024	0.474566	0.277227	0.0869279	0.167405	475.919	65.8346	0.876689	0.279213	0.00169034	0.00471348	313.416	43.3554	0.276362	0.277132	0.318656	0.805768
FBgn0004369	Ptp99A	3R	29377646	29487131	+	9139	519.267	56.8188	1701.49	186.179	1.70692	0.297968	1.01288e-08	1.3692e-07	2907.87	318.182	2.47588	0.298179	1.01221e-16	1.95054e-15	573.012	62.6997	0.136546	0.298786	0.647669	0.919956
FBgn0004370	Ptp10D	X	11622015	11677338	+	8708	300.375	34.4941	422.876	48.5618	0.480387	0.266945	0.0719283	0.143987	695.561	79.876	1.18663	0.267942	9.48151e-06	4.17878e-05	320.369	36.7902	0.0790951	0.267219	0.767235	0.95374
FBgn0004372	aly	3L	3024129	3026521	-	2267	0	0	0	0	NA	NA	NA	NA	0	0	NA	NA	NA	NA	0	0	NA	NA	NA	NA
FBgn0004373	fwd	3L	305393	319884	-	7436	1492.5	200.713	3037.25	408.452	1.02269	0.351374	0.00360794	0.0120854	4145.94	557.55	1.47191	0.351565	2.82987e-05	0.000114043	1695.71	228.04	0.181759	0.351506	0.605095	0.907906
FBgn0004374	neb	2L	20075757	20089698	+	3592	321.168	89.412	351.319	97.806	0.1377	0.215785	0.523386	0.648302	437.857	121.898	0.425233	0.218667	0.0518158	0.0933179	317.183	88.3025	-0.00841814	0.215536	0.968845	0.996057
FBgn0004378	Klp61F	3L	1241568	1245910	-	3871	647.82	167.352	535.534	138.345	-0.279301	0.205988	0.175128	0.287423	401.846	103.809	-0.661777	0.210541	0.00167104	0.00466541	607.056	156.822	-0.0987778	0.205342	0.630487	0.917277
FBgn0004379	Klp67A	3L	9362636	9367046	-	3086	840.477	272.352	750.101	243.066	-0.161181	0.282962	0.568934	0.687607	904.016	292.941	0.0924649	0.284197	0.744912	0.811874	554.306	179.62	-0.597502	0.283143	0.0348367	0.494863
FBgn0004380	Klp64D	3L	5356864	5359392	-	2529	102.696	40.6073	132.201	52.2738	0.37827	0.356324	0.288422	0.420244	217.03	85.8166	1.03611	0.358739	0.00387465	0.00988249	79.7487	31.5337	-0.352368	0.35865	0.325861	0.805768
FBgn0004381	Klp68D	3L	11795614	11798875	+	2998	121.887	40.6562	239.789	79.983	0.980578	0.302794	0.0012019	0.00481452	522.146	174.165	2.0745	0.303069	7.64803e-12	8.13962e-11	80.7129	26.9223	-0.590688	0.308468	0.0555038	0.563688
FBgn0004387	Klp98A	3R	27547775	27559145	-	5530	301.851	54.5842	684.95	123.861	1.17984	0.384118	0.00212945	0.0077549	1838.06	332.38	2.59691	0.383997	1.35316e-11	1.39426e-10	287.853	52.0529	-0.0711157	0.385173	0.853517	0.97165
FBgn0004389	bnk	3R	31193362	31194389	+	1028	0	0	0	0	NA	NA	NA	NA	0	0	NA	NA	NA	NA	0	0	NA	NA	NA	NA
FBgn0004390	RasGAP1	3L	9839093	9855285	-	5434	540.048	99.3831	919.652	169.24	0.761826	0.308459	0.0135197	0.0370492	1225.97	225.612	1.16958	0.309207	0.000155257	0.000539172	583.684	107.413	0.105596	0.308777	0.732364	0.946312
FBgn0004391	shtd	X	15455544	15462441	-	6481	279.171	43.0753	211.121	32.5754	-0.402301	0.233447	0.0848329	0.164403	290.742	44.8606	0.000695306	0.236899	0.997658	0.998509	230.655	35.5893	-0.27632	0.232165	0.233972	0.745969
FBgn0004394	pdm2	2L	12657165	12686306	+	4624	0	0	0.230361	0.0498186	0.2168	4.40736	0.960767	NA	0	0	0	4.40736	1	NA	0	0	0	4.40736	1	NA
FBgn0004395	unk	3R	23149653	23157862	-	6328	1387.3	219.233	1689.74	267.026	0.282257	0.251694	0.262106	0.390378	2085.14	329.51	0.579443	0.252287	0.0216324	0.0442318	1324.34	209.282	-0.0695239	0.251742	0.782417	0.955423
FBgn0004396	CrebA	3L	15535395	15553214	+	4498	887.067	197.214	1097	243.887	0.308458	0.468159	0.509977	0.636645	2685.7	597.089	1.5966	0.468144	0.000648452	0.00198413	447.893	99.576	-0.983864	0.468731	0.0358175	0.500881
FBgn0004397	Vinc	X	2214347	2222567	-	3933	462.239	117.528	1170.83	297.694	1.32902	0.206754	1.29263e-10	2.26447e-09	1769.36	449.875	1.92853	0.207364	1.40148e-20	3.75539e-19	534.195	135.824	0.197249	0.207718	0.342316	0.813782
FBgn0004400	rhi	2R	17628491	17633516	-	1570	0	0	0	0	NA	NA	NA	NA	0	0	NA	NA	NA	NA	0	0	NA	NA	NA	NA
FBgn0004401	Pep	3L	17638103	17645036	-	2792	10167.8	3641.77	6890.12	2467.81	-0.560623	0.131828	2.11208e-05	0.000138717	4272.55	1530.28	-1.25066	0.132664	4.21047e-21	1.18429e-19	8634.74	3092.67	-0.234974	0.131727	0.074457	0.616522
FBgn0004403	RpS14a	X	7933742	7934677	+	877	1861.27	2122.32	711.273	811.03	-1.38638	0.405578	0.00063018	0.00275062	1053	1200.69	-0.827653	0.406153	0.0415715	0.0775198	1395.8	1591.56	-0.413531	0.405029	0.307258	0.800442
FBgn0004404	RpS14b	X	7934898	7935792	+	597	1064.54	1783.15	326.631	547.121	-1.70205	0.499432	0.000654502	0.00284718	655.218	1097.52	-0.701887	0.499733	0.160163	0.240603	811.115	1358.65	-0.389386	0.498307	0.434557	0.847298
FBgn0004406	tam	2L	13823980	13827772	-	3679	205.195	55.7747	144.205	39.1967	-0.522001	0.195427	0.0075607	0.0227726	121.601	33.0528	-0.794333	0.206986	0.000124238	0.000440228	193.069	52.4786	-0.101354	0.191773	0.597146	0.905969
FBgn0004407	DNApol-gamma35	2L	13831482	13833105	-	1570	0	0	0	0	NA	NA	NA	NA	0	0	NA	NA	NA	NA	0	0	NA	NA	NA	NA
FBgn0004414	msopa	3L	22082720	22083367	+	648	0	0	0	0	0	4.40736	1	NA	0.276259	0.426326	1.0622	4.3837	0.808543	NA	0	0	0	4.40736	1	NA
FBgn0004419	me31B	2L	10239341	10242172	+	1845	2274.01	1232.53	965.776	523.456	-1.23481	0.227291	5.5499e-08	6.25971e-07	653.458	354.178	-1.77557	0.230175	1.21927e-14	1.81032e-13	2225.13	1206.03	-0.0304596	0.226488	0.893018	0.980439
FBgn0004425	LysB	3L	1207371	1207981	+	611	0	0	0	0	NA	NA	NA	NA	0	0	NA	NA	NA	NA	0	0	NA	NA	NA	NA
FBgn0004426	LysC	3L	1210485	1210726	+	242	0	0	0	0	NA	NA	NA	NA	0	0	NA	NA	NA	NA	0	0	NA	NA	NA	NA
FBgn0004427	LysD	3L	1210717	1211196	-	480	0	0	0	0	NA	NA	NA	NA	0	0	NA	NA	NA	NA	0	0	NA	NA	NA	NA
FBgn0004428	LysE	3L	1212827	1213406	+	580	0	0	0	0	NA	NA	NA	NA	0	0	NA	NA	NA	NA	0	0	NA	NA	NA	NA
FBgn0004429	LysP	3L	1218082	1218696	-	615	0	0	0	0	NA	NA	NA	NA	0	0	NA	NA	NA	NA	0	0	NA	NA	NA	NA
FBgn0004430	LysS	3L	1227747	1228238	+	492	0	0	0	0	0	4.40736	1	NA	0	0	0	4.40736	1	NA	0.207585	0.42192	-0.0223957	4.40736	0.995946	NA
FBgn0004431	LysX	3L	1194739	1195302	-	564	0	0	0	0	NA	NA	NA	NA	0	0	NA	NA	NA	NA	0	0	NA	NA	NA	NA
FBgn0004432	Cyp1	X	16317673	16320370	-	1227	5479.58	4465.83	2072.94	1689.44	-1.40151	0.29646	2.27307e-06	1.91153e-05	2679.38	2183.69	-1.03274	0.296834	0.000502939	0.00157944	3934.31	3206.44	-0.477023	0.296209	0.107304	0.656962
FBgn0004435	Galphaq	2R	12612740	12623197	+	6910	169.263	24.4954	152.575	22.0804	-0.173083	0.201911	0.39132	0.52639	145.872	21.1103	-0.194762	0.210161	0.354068	0.458179	171.984	24.8892	0.00442185	0.199612	0.982327	0.998933
FBgn0004436	Ubc6	3R	4948755	4952682	-	2166	1847.4	852.911	3159.89	1458.86	0.778048	0.136719	1.26419e-08	1.6715e-07	4238.51	1956.84	1.19807	0.137193	2.48573e-18	5.54515e-17	1632.27	753.586	-0.175008	0.137122	0.201853	0.727507
FBgn0004449	Ten-m	3L	22293044	22407863	-	13109	438.671	33.4634	348.965	26.6203	-0.335623	0.232859	0.149496	0.255083	552.918	42.1785	0.303733	0.23436	0.194972	0.283082	417.76	31.8682	-0.0777567	0.23185	0.737342	0.946501
FBgn0004456	mew	X	13214409	13258490	-	5204	12.6527	2.43134	902.921	173.505	6.21256	0.302122	5.8785e-94	2.66208e-90	998.468	191.866	6.35693	0.303118	1.18769e-97	1.79282e-94	19.2071	3.69084	0.644681	0.339261	0.0574002	0.565145
FBgn0004463	RpIII128	2R	12039041	12042623	+	3532	148.557	42.0604	112.911	31.9681	-0.389778	0.26461	0.140744	0.243128	197.554	55.9326	0.346841	0.267032	0.193988	0.281857	111.616	31.6014	-0.404636	0.263234	0.124251	0.670486
FBgn0004465	Su(P)	3L	16610662	16612199	-	1412	171.874	121.724	100.765	71.3633	-0.747922	0.237177	0.00161362	0.00613542	74.5071	52.767	-1.1324	0.25272	7.43385e-06	3.3397e-05	137.618	97.463	-0.296159	0.232699	0.203119	0.727507
FBgn0004507	GlyP	2L	2130813	2137296	+	3144	3308.05	1052.18	2322.8	738.803	-0.508549	0.0840487	1.44263e-09	2.21832e-08	1874.41	596.187	-0.810279	0.086311	6.12148e-21	1.69548e-19	2639.14	839.42	-0.324471	0.0836809	0.000105547	0.0221442
FBgn0004509	Fur1	3R	25347431	25473058	-	9128	789.831	86.5283	1152.37	126.246	0.544029	0.249698	0.0293505	0.0695884	2197.54	240.747	1.46754	0.249927	4.30926e-09	3.25784e-08	780.061	85.458	-0.0192402	0.249932	0.938638	0.988714
FBgn0004510	Ets97D	3R	26910775	26912886	-	1858	156.817	84.4007	185.946	100.079	0.266198	0.176879	0.132331	0.232047	212.947	114.611	0.440586	0.182548	0.0157987	0.0337395	161.861	87.1158	0.0600082	0.176657	0.734092	0.946501
FBgn0004511	dy	X	11769769	11778784	-	4075	26.2359	6.43825	401.762	98.592	3.84392	0.284332	1.20652e-41	4.37099e-39	738.293	181.176	4.72963	0.284889	6.77599e-62	2.66827e-59	52.8184	12.9616	0.920388	0.297094	0.00194854	0.139427
FBgn0004512	Mdr49	2R	12940323	12946347	-	4396	39.5522	8.99732	17.9333	4.07945	-1.17195	0.412698	0.00451532	0.0147264	40.6148	9.23904	-0.173482	0.410501	0.67258	0.753998	34.1297	7.7638	-0.248768	0.391588	0.525246	0.883407
FBgn0004513	Mdr65	3L	6240500	6245746	-	4135	2.44523	0.591348	8.39073	2.0292	1.56281	0.770297	0.0424744	0.0937127	10.1253	2.44867	1.89826	0.785857	0.0157123	0.0336025	5.73596	1.38717	0.998201	0.780915	0.201163	0.727424
FBgn0004514	Oct-TyrR	3L	22035003	22065279	+	3682	0	0	0.315954	0.0858105	0.216781	4.40736	0.960771	NA	0.276259	0.0750296	1.06218	4.3837	0.808546	NA	0.223579	0.060722	-0.0224149	4.40736	0.995942	NA
FBgn0004516	Gad1	3L	4074077	4088744	-	3684	139.454	37.8539	139.709	37.9232	-0.0152969	0.363642	0.966446	0.980315	113.016	30.6775	-0.269564	0.37206	0.468748	0.570087	250	67.861	0.822529	0.360752	0.0226052	0.435011
FBgn0004552	Akh	3L	4141467	4142070	+	536	0.656758	1.2253	0.315954	0.589467	-1.50077	1.91763	0.433852	0.567013	1.58646	2.95981	1.28596	1.66562	0.440077	0.544325	1.37852	2.57186	0.764965	1.62207	0.637213	NA
FBgn0004554	Edg91	3R	17610856	17611511	-	604	0	0	0	0	NA	NA	NA	NA	0	0	NA	NA	NA	NA	0	0	NA	NA	NA	NA
FBgn0004556	Dbp73D	3L	16728496	16730818	-	2209	222.057	100.524	123.608	55.9564	-0.832416	0.205111	4.94157e-05	0.000295418	73.275	33.1711	-1.54713	0.224582	5.62143e-12	6.08283e-11	192.825	87.2907	-0.185133	0.200006	0.354635	0.816395
FBgn0004567	slp2	2L	3836840	3839185	+	2346	0	0	0	0	NA	NA	NA	NA	0	0	NA	NA	NA	NA	0	0	NA	NA	NA	NA
FBgn0004569	aos	3L	16470386	16483650	-	2822	400.533	141.932	561.428	198.947	0.473835	0.179739	0.00838314	0.0248775	574.314	203.513	0.496503	0.182845	0.00661896	0.0158742	385.124	136.472	-0.0698172	0.180362	0.698687	0.935719
FBgn0004573	5-HT7	3R	30968236	31016875	-	4486	9.41794	2.09941	4.91794	1.09629	-0.902493	0.573765	0.115735	0.20864	9.32019	2.07762	0.0591077	0.556178	0.915364	0.940412	8.04969	1.7944	-0.202727	0.525756	0.699799	0.936164
FBgn0004574	Rop	3L	4136359	4138996	-	2638	368.872	139.83	416.195	157.769	0.158805	0.15478	0.304891	0.437096	512.942	194.443	0.444348	0.157808	0.00486648	0.0121021	307.218	116.459	-0.278485	0.155385	0.0730973	0.612682
FBgn0004575	Syn	3R	10190689	10222442	+	5803	160.953	27.7362	861.168	148.4	2.40136	0.41233	5.7495e-09	7.99896e-08	1305.11	224.903	3.00049	0.412765	3.61492e-13	4.43635e-12	249.173	42.9387	0.612032	0.413817	0.139142	0.686137
FBgn0004577	Pxd	3R	17014576	17027987	+	2630	0.328379	0.124859	0	0	-1.70674	4.40736	0.698573	NA	0	0	-0.913748	4.40736	0.835757	NA	0.207585	0.0789295	-0.984146	4.40736	0.823305	NA
FBgn0004580	Cbp53E	2R	16973927	16996057	+	2754	0.328379	0.119237	0	0	-1.70673	4.40736	0.698575	NA	0	0	-0.913739	4.40736	0.835759	NA	0	0	-1.94592	4.40736	0.658839	NA
FBgn0004581	bgcn	2R	23853270	23858921	-	4159	3.16835	0.761807	1.34561	0.323543	-1.30923	1.12011	0.24247	0.367848	0.276259	0.0664244	-2.74316	1.42857	0.0548317	0.0981752	4.5987	1.10572	0.477885	0.970503	0.62243	0.914767
FBgn0004583	ex	2L	431227	448701	+	6672	2335.23	350.004	1957.96	293.459	-0.255607	0.345228	0.459057	0.591841	1909.44	286.187	-0.289805	0.345809	0.402002	0.506318	2500.13	374.72	0.0969236	0.345088	0.778813	0.955003
FBgn0004584	Rrp1	2L	2969773	2972508	-	2551	1316.45	516.052	441.698	173.147	-1.57302	0.369382	2.05784e-05	0.000135548	374.356	146.749	-1.83598	0.37236	8.195e-07	4.3354e-06	893.257	350.159	-0.556981	0.368388	0.130549	0.673164
FBgn0004587	B52	3R	13661311	13666891	+	4313	2306	534.663	1195.91	277.28	-0.947939	0.118305	1.12227e-15	3.955e-14	1034.28	239.804	-1.16865	0.121194	5.27202e-22	1.57068e-20	2116.36	490.693	-0.123488	0.117273	0.292342	0.788315
FBgn0004588	Eig71Ea	3L	15649126	15649661	-	412	0	0	0	0	NA	NA	NA	NA	0	0	NA	NA	NA	NA	0	0	NA	NA	NA	NA
FBgn0004589	Eig71Eb	3L	15649936	15650541	+	472	0	0	0	0	NA	NA	NA	NA	0	0	NA	NA	NA	NA	0	0	NA	NA	NA	NA
FBgn0004590	Eig71Ec	3L	15651479	15652254	-	639	0	0	0	0	NA	NA	NA	NA	0	0	NA	NA	NA	NA	0	0	NA	NA	NA	NA
FBgn0004591	Eig71Ed	3L	15652537	15653096	+	415	0	0	0	0	NA	NA	NA	NA	0	0	NA	NA	NA	NA	0	0	NA	NA	NA	NA
FBgn0004592	Eig71Ee	3L	15654472	15656010	-	1486	0	0	0	0	NA	NA	NA	NA	0	0	NA	NA	NA	NA	0	0	NA	NA	NA	NA
FBgn0004593	Eig71Ef	3L	15656655	15657390	-	420	0	0	0	0	NA	NA	NA	NA	0	0	NA	NA	NA	NA	0	0	NA	NA	NA	NA
FBgn0004594	Eig71Eg	3L	15657628	15658149	+	413	0	0	0	0	NA	NA	NA	NA	0	0	NA	NA	NA	NA	0	0	NA	NA	NA	NA
FBgn0004595	pros	3R	11328480	11407627	+	24892	0.328379	0.0131922	2.6735	0.107404	2.4796	1.49534	0.0972738	0.182441	4.58451	0.184176	2.97214	1.51175	0.0492961	0.0895277	0.706095	0.0283663	0.518618	1.64662	0.752793	0.94909
FBgn0004597	CycC	3R	14889004	14890205	-	1142	106.48	93.2402	192.082	168.198	0.852163	0.228769	0.000195319	0.00099603	187.815	164.462	0.885331	0.234898	0.000163901	0.000567885	116.687	102.178	0.134512	0.231185	0.560676	0.896856
FBgn0004598	Fur2	X	16373086	16381782	+	6474	517.816	79.984	553.757	85.5355	0.0900559	0.353218	0.798755	0.863285	519.049	80.1744	-0.00102621	0.355291	0.997695	0.998509	619.77	95.7321	0.252249	0.352866	0.474697	0.861432
FBgn0004606	zfh1	3R	30765926	30789202	+	6915	7650.25	1106.33	8676.62	1254.75	0.181951	0.283935	0.521639	0.646986	12355.9	1786.83	0.690764	0.28401	0.0150082	0.0323179	5233.05	756.768	-0.54756	0.283979	0.0538341	0.56061
FBgn0004607	zfh2	4	501810	540874	+	12424	9322.76	750.383	6472.94	521.003	-0.52661	0.364259	0.148261	0.253406	4438.32	357.238	-1.07026	0.364548	0.00332626	0.00863454	8151.62	656.119	-0.19401	0.36422	0.59426	0.904392
FBgn0004611	Plc21C	2L	305935	355566	+	7774	211.182	27.1652	185.78	23.8976	-0.204494	0.278462	0.462723	0.595227	197.4	25.3923	-0.128972	0.283939	0.649669	0.734404	237.321	30.5275	0.147185	0.276638	0.594692	0.904764
FBgn0004618	gl	3R	18367927	18372738	-	3399	0	0	0	0	0	4.40736	1	NA	0	0	0	4.40736	1	NA	0.207585	0.0610722	-0.0223957	4.40736	0.995946	NA
FBgn0004619	GluRIA	3L	6624032	6635059	+	3810	0	0	0	0	NA	NA	NA	NA	0	0	NA	NA	NA	NA	0	0	NA	NA	NA	NA
FBgn0004620	GluRIIA	2L	5555072	5558994	+	3253	33.808	10.3929	15.6485	4.81048	-1.12788	0.350323	0.001284	0.00509158	16.6284	5.11172	-0.944785	0.369468	0.0105534	0.0238004	42.5361	13.076	0.312268	0.314104	0.320148	0.805768
FBgn0004622	TkR99D	3R	29950796	29969447	-	2880	0	0	0.230361	0.0799865	0.2168	4.40736	0.960767	NA	0	0	0	4.40736	1	NA	0	0	0	4.40736	1	NA
FBgn0004623	Gbeta76C	3L	19687637	19689992	+	1466	0	0	1.09263	0.745314	2.15106	2.78946	0.440626	NA	0.78138	0.533001	2.09245	2.83643	0.460694	NA	0	0	0	2.94258	1	NA
FBgn0004629	Cys	3R	14569103	14569644	-	484	452.311	934.526	100.915	208.503	-2.15803	0.418771	2.56023e-07	2.60247e-06	212.376	438.794	-1.12058	0.419471	0.00755353	0.0178482	394.098	814.253	-0.192408	0.413598	0.641785	0.919141
FBgn0004635	rho	3L	1463811	1468944	+	3000	163.825	54.6084	63.9288	21.3096	-1.35283	0.580394	0.0197592	0.0505392	121.107	40.369	-0.497348	0.582327	0.393067	0.497301	101.164	33.7214	-0.689046	0.57688	0.232308	0.744593
FBgn0004636	Rap1	3L	1859115	1862239	-	3012	26487.9	8794.13	25778.5	8558.6	-0.0390917	0.547733	0.943103	0.965271	50152.1	16650.8	0.9209	0.547737	0.0927083	0.152278	14219.6	4720.99	-0.897373	0.547743	0.101357	0.648512
FBgn0004638	drk	2R	13495222	13502841	-	2946	880.854	299	1308.69	444.225	0.573101	0.106747	7.92731e-08	8.6817e-07	1244.84	422.554	0.510993	0.109134	2.83732e-06	1.36835e-05	907.043	307.89	0.0445607	0.107172	0.677566	0.929721
FBgn0004643	Zw10	X	2604197	2606824	+	2567	174.114	67.8279	246.903	96.1834	0.525897	0.247907	0.0338926	0.0783274	279.909	109.041	0.680798	0.252111	0.00692578	0.0165419	147.074	57.2943	-0.220544	0.249768	0.377239	0.82277
FBgn0004644	hh	3R	23128169	23141906	-	2370	105.631	44.5702	192.308	81.1428	0.837052	0.411123	0.0417491	0.0923438	148.06	62.4724	0.478086	0.417578	0.25225	0.348798	156.42	66.0001	0.539779	0.411244	0.189334	0.71806
FBgn0004646	ogre	X	6973620	6991318	-	3940	103.942	26.3813	244.95	62.17	1.24441	0.297504	2.87889e-05	0.000181701	506.99	128.678	2.26604	0.297973	2.85281e-14	3.99967e-13	161.102	40.8889	0.639655	0.298568	0.0321605	0.479517
FBgn0004647	N	X	3134870	3172221	+	10150	1669.53	164.486	1454.51	143.301	-0.201546	0.191488	0.292559	0.424632	1858.86	183.139	0.147111	0.192304	0.444275	0.548351	1652	162.758	-0.0182803	0.191231	0.923844	0.986574
FBgn0004648	svr	X	496446	509072	+	8583	697.105	81.2192	1039.01	121.054	0.570586	0.225575	0.0114231	0.0322203	1439.99	167.772	1.03198	0.226385	5.15207e-06	2.39049e-05	918.812	107.05	0.39291	0.225518	0.0814635	0.623997
FBgn0004649	yl	X	14193214	14199958	+	6351	0.328379	0.0517051	0.631908	0.0994974	0.38379	4.35077	0.929708	NA	0	0	-0.913759	4.40736	0.835755	NA	0	0	-1.94594	4.40736	0.658835	NA
FBgn0004650	fs(1)N	X	1322513	1329438	+	6581	438.342	66.6072	59.3542	9.01903	-2.89579	0.224729	5.4177e-38	1.53338e-35	44.3123	6.73337	-3.29361	0.248294	3.6964e-40	3.93863e-38	333.681	50.7036	-0.402964	0.206406	0.0509039	0.555957
FBgn0004652	fru	3R	18414273	18545586	-	18433	4033.5	218.819	5883.05	319.158	0.544841	0.275721	0.0481482	0.104002	9114.34	494.458	1.17471	0.275812	2.0526e-05	8.49264e-05	3395.63	184.215	-0.248115	0.275799	0.368321	0.820378
FBgn0004654	Pgd	X	2145136	2148566	+	1895	213.174	112.493	265.702	140.212	0.304247	0.266134	0.252951	0.380119	285.316	150.563	0.445968	0.269986	0.0985721	0.160281	255.615	134.889	0.248702	0.265644	0.349158	0.814457
FBgn0004655	wapl	X	2149936	2158983	-	7054	1038.98	147.29	1399.16	198.35	0.424187	0.155795	0.00647452	0.0199727	1442.82	204.54	0.463611	0.157318	0.00320905	0.0083759	992.033	140.634	-0.0725709	0.156033	0.64186	0.919141
FBgn0004656	fs(1)h	X	8037808	8061436	-	15685	6696.53	426.938	4063.6	259.075	-0.720402	0.449042	0.108646	0.198229	7903.91	503.915	0.238085	0.449076	0.595996	0.687752	3750.72	239.128	-0.836003	0.449029	0.062631	0.57806
FBgn0004657	mys	X	8061645	8070237	+	4482	2663.66	594.301	4084.06	911.215	0.614772	0.198078	0.00191123	0.0070696	5179.49	1155.62	0.955446	0.198373	1.46168e-06	7.4457e-06	2473.13	551.791	-0.108909	0.198211	0.582689	0.903723
FBgn0004666	sim	3R	13057755	13078124	+	3547	0	0	0.230361	0.0649453	0.216791	4.40736	0.960769	NA	0.25256	0.0712039	0.99253	4.38784	0.821046	NA	0	0	0	4.40736	1	NA
FBgn0004687	Mlc-c	X	5619136	5622539	-	1399	2061.44	1473.51	2405.98	1719.79	0.222131	0.0999515	0.0262572	0.0637563	3111.61	2224.17	0.585362	0.100812	6.38024e-09	4.6866e-08	1887.23	1348.99	-0.128323	0.100036	0.199574	0.725865
FBgn0004698	Xpc	2R	15311510	15318239	+	4830	788.143	163.177	965.772	199.953	0.294268	0.120618	0.0147004	0.039649	816.7	169.089	0.030349	0.124142	0.806867	0.860753	757.748	156.884	-0.0567523	0.120794	0.638478	0.918273
FBgn0004777	Ccp84Ag	3R	6686728	6688039	+	1097	0	0	0	0	NA	NA	NA	NA	0	0	NA	NA	NA	NA	0	0	NA	NA	NA	NA
FBgn0004778	Ccp84Af	3R	6689602	6690239	-	580	0	0	0	0	NA	NA	NA	NA	0	0	NA	NA	NA	NA	0	0	NA	NA	NA	NA
FBgn0004779	Ccp84Ae	3R	6690887	6691758	-	754	0	0	0	0	NA	NA	NA	NA	0	0	NA	NA	NA	NA	0	0	NA	NA	NA	NA
FBgn0004780	Ccp84Ad	3R	6692732	6693527	+	735	0	0	0	0	NA	NA	NA	NA	0	0	NA	NA	NA	NA	0	0	NA	NA	NA	NA
FBgn0004781	Ccp84Ac	3R	6695148	6696271	-	1060	0	0	0	0	NA	NA	NA	NA	0	0	NA	NA	NA	NA	0	0	NA	NA	NA	NA
FBgn0004782	Ccp84Ab	3R	6701968	6702877	-	834	0	0	0	0	NA	NA	NA	NA	0	0	NA	NA	NA	NA	0	0	NA	NA	NA	NA
FBgn0004783	Ccp84Aa	3R	6704084	6704903	+	765	0	0	0	0	NA	NA	NA	NA	0	0	NA	NA	NA	NA	0	0	NA	NA	NA	NA
FBgn0004784	inaC	2R	16898535	16901575	+	2351	0	0	0	0	NA	NA	NA	NA	0	0	NA	NA	NA	NA	0	0	NA	NA	NA	NA
FBgn0004795	retn	2R	23632610	23654820	+	4477	2.83306	0.632803	0.460722	0.102909	-2.37414	1.43065	0.0970179	0.182037	1.58646	0.354357	-0.37731	1.18618	0.750417	0.816302	2.81393	0.62853	0.107	1.06622	0.920062	0.985233
FBgn0004797	mdy	2L	16816660	16826964	+	2689	31.0274	11.5387	25.1673	9.35935	-0.299632	0.33111	0.365502	0.50068	23.4234	8.71084	-0.289565	0.351129	0.409561	0.513624	35.125	13.0625	0.178627	0.31789	0.574174	0.90181
FBgn0004811	fs(2)ltoPP43	2L	19792773	19795851	-	2435	833.465	342.285	1174.62	482.391	0.491666	0.10236	1.56059e-06	1.35776e-05	1160.44	476.567	0.471696	0.104899	6.90212e-06	3.12406e-05	829.073	340.482	-0.0101043	0.102803	0.921703	0.986008
FBgn0004828	His3.3B	X	9152523	9156669	-	2552	2004.94	785.636	2606.02	1021.17	0.377368	0.276766	0.172727	0.284797	2294.74	899.192	0.199605	0.277405	0.471805	0.573114	2401.67	941.093	0.259584	0.276732	0.348228	0.814457
FBgn0004832	Xpac	X	4102955	4104197	-	1178	294.595	250.081	408.192	346.512	0.486946	0.185898	0.00880758	0.0260347	473.832	402.234	0.718964	0.188911	0.000141332	0.000495181	270.947	230.006	-0.102959	0.186872	0.581663	0.903723
FBgn0004837	Su(H)	2L	15039488	15043334	+	2950	282.798	95.8639	397.102	134.611	0.492836	0.166048	0.00299704	0.0103249	531.115	180.039	0.882974	0.168609	1.63383e-07	9.69701e-07	317.649	107.678	0.168825	0.166277	0.309951	0.802346
FBgn0004838	Hrb27C	2L	6920704	6932057	+	8693	67715.2	7789.63	72409.4	8329.62	0.0967314	0.414978	0.815684	0.877914	97356.5	11199.4	0.523731	0.414985	0.206932	0.2973	44780	5151.28	-0.596588	0.414981	0.15054	0.69272
FBgn0004839	otk	2R	12001473	12019846	-	4769	1.02178	0.214255	3.29672	0.691281	1.45201	1.08129	0.17932	0.292474	13.7862	2.8908	3.44093	1.04024	0.000940211	0.00277287	4.03621	0.846344	1.71698	1.05876	0.104869	0.653682
FBgn0004841	TkR86C	3R	10737592	10751228	-	3223	0	0	0	0	0	4.40736	1	NA	0	0	0	4.40736	1	NA	0.223579	0.0693697	-0.0223957	4.40736	0.995946	NA
FBgn0004842	RYa-R	3R	26996980	27057935	+	2302	0	0	0	0	NA	NA	NA	NA	0	0	NA	NA	NA	NA	0	0	NA	NA	NA	NA
FBgn0004852	Ac76E	3L	19939287	19977960	+	5320	241.037	45.3078	373.055	70.1231	0.615187	0.338538	0.0691886	0.139161	521.613	98.0475	1.10549	0.339951	0.00114636	0.00331711	322.459	60.6126	0.40494	0.338481	0.231561	0.744394
FBgn0004854	B-H2	X	17314581	17324175	+	3142	0	0	0	0	NA	NA	NA	NA	0	0	NA	NA	NA	NA	0	0	NA	NA	NA	NA
FBgn0004855	RpII15	3R	14309089	14310178	+	1035	91.39	88.2996	133.537	129.021	0.537512	0.276957	0.0522857	0.110967	114.879	110.994	0.412165	0.285834	0.14931	0.227125	117.087	113.127	0.349088	0.27666	0.207023	0.729382
FBgn0004856	Bx42	X	9103870	9106604	-	2403	1157.59	481.728	1226.79	510.524	0.0893361	0.222965	0.688661	0.782782	1182.35	492.031	0.0325028	0.224382	0.884826	0.919443	895.143	372.511	-0.365413	0.223121	0.101476	0.648512
FBgn0004858	elB	2L	14390628	14409549	-	3326	218.142	65.5869	265.484	79.8208	0.288907	0.479093	0.546489	0.669389	1056.89	317.767	2.27228	0.478215	2.01834e-06	1.00275e-05	154.072	46.3236	-0.496239	0.480073	0.301289	0.796086
FBgn0004859	ci	4	47710	57041	-	5651	1.78155	0.315263	2.24933	0.398041	0.437492	1.1046	0.692058	0.785066	1.83902	0.325432	0.483955	1.16049	0.676658	0.75754	1.5861	0.280676	-0.114856	1.13044	0.919072	0.984908
FBgn0004860	ph-d	X	2115727	2123286	-	6126	512.659	83.6858	589.387	96.2107	0.195691	0.407436	0.631015	0.73774	491.914	80.2994	-0.0582891	0.409482	0.886805	0.920688	479.595	78.2884	-0.10206	0.407475	0.802225	0.960152
FBgn0004861	ph-p	X	2126210	2138371	-	6887	688.119	99.9156	899.302	130.58	0.381537	0.390762	0.32887	0.462584	1123.18	163.087	0.704359	0.391458	0.0719674	0.123677	840.545	122.048	0.283926	0.390683	0.467383	0.857417
FBgn0004862	bap	3R	21388880	21390449	+	1449	0.328379	0.226625	0	0	-1.70673	4.40736	0.698575	NA	0	0	-0.913739	4.40736	0.835759	NA	0	0	-1.94592	4.40736	0.658839	NA
FBgn0004863	C15	3R	21499986	21512814	+	1856	0	0	0	0	NA	NA	NA	NA	0	0	NA	NA	NA	NA	0	0	NA	NA	NA	NA
FBgn0004864	hop	X	11360930	11368098	-	5055	464.514	91.892	740.952	146.578	0.663606	0.226287	0.00336157	0.0113944	625.993	123.836	0.433507	0.228994	0.0583456	0.103473	495.937	98.1083	0.0841147	0.226713	0.710624	0.938704
FBgn0004865	Eip78C	3L	21226609	21266503	+	5878	15.8349	2.69392	11.2845	1.91978	-0.544866	0.490261	0.266405	0.395611	11.0166	1.87421	-0.600495	0.524245	0.252024	0.348538	11.2253	1.90971	-0.524616	0.481794	0.276207	0.777532
FBgn0004867	RpS2	2L	9896265	9897552	-	1208	2350.54	1945.81	1205.17	997.656	-0.962916	0.225946	2.02875e-05	0.000133983	1615.18	1337.07	-0.550441	0.226709	0.0151838	0.0326262	2086.28	1727.06	-0.171127	0.225423	0.447769	0.851968
FBgn0004868	Gdi	2L	9491176	9494876	-	2501	4644.74	1857.15	2898.11	1158.78	-0.679528	0.260473	0.00908535	0.0266898	3253.08	1300.71	-0.51497	0.260879	0.0483838	0.0880634	3717.26	1486.31	-0.320286	0.260346	0.21861	0.731421
FBgn0004870	bab1	3L	1036369	1101089	-	5340	0	0	2.39789	0.449044	3.28389	1.48075	0.0265743	0.0644229	11.3231	2.12044	5.33834	1.43895	0.00020735	0.000704677	1.53306	0.28709	2.66538	1.50396	0.0763555	0.619048
FBgn0004872	piwi	2L	10982205	10987420	-	3073	149.891	48.7767	841.216	273.744	2.47413	0.381032	8.40102e-11	1.50669e-09	218.357	71.0567	0.564877	0.387449	0.144857	0.22143	207.13	67.4033	0.452138	0.383117	0.237938	0.749737
FBgn0004875	enc	3L	3818679	3842326	+	9058	2314.31	255.499	3069.96	338.922	0.407581	0.281573	0.147754	0.252767	5105.99	563.699	1.13836	0.28171	5.32485e-05	0.000203748	1661.14	183.39	-0.47858	0.281751	0.0893963	0.638734
FBgn0004876	cdi	3R	19044882	19094270	-	6526	373.989	57.3076	2079.09	318.585	2.47579	0.420426	3.89069e-09	5.54928e-08	4867.41	745.849	3.70063	0.420431	1.34396e-18	3.10516e-17	286.966	43.9728	-0.381169	0.422039	0.366441	0.820131
FBgn0004878	cas	3R	5712975	5716805	-	3151	20.9804	6.65833	78.2615	24.8371	1.8487	0.403598	4.63757e-06	3.62937e-05	141.368	44.8646	2.72646	0.405201	1.71222e-11	1.74438e-10	48.3497	15.3442	1.14565	0.406829	0.00486198	0.221284
FBgn0004880	scrt	3L	3983896	3994003	+	9075	1.77464	0.195552	0.631908	0.0696318	-1.41903	1.90308	0.45588	0.588666	7.89767	0.870267	2.1452	1.68642	0.203357	0.293187	0.207585	0.0228743	-2.68323	2.0143	0.18283	0.710666
FBgn0004882	orb	3R	23260610	23280856	-	9551	4.88354	0.511311	14.0273	1.46867	1.40676	0.600223	0.0190921	0.0490963	16.3204	1.70876	1.70418	0.614216	0.00552776	0.0135367	5.33139	0.558202	0.0105861	0.638902	0.98678	0.999184
FBgn0004885	tok	3R	24719697	24749125	+	5411	1.37989	0.255015	0.736327	0.13608	-0.805901	2.00786	0.688145	NA	1.01024	0.186701	-0.0180398	1.98956	0.992765	NA	0.241258	0.0445866	-2.45813	2.16567	0.256356	NA
FBgn0004888	Scsalpha1	3L	3814211	3818383	+	1479	1708.59	1155.24	1321.32	893.385	-0.368725	0.162039	0.022874	0.0570087	1067.44	721.729	-0.660764	0.164286	5.77e-05	0.000219483	1845.47	1247.78	0.11337	0.161524	0.482756	0.86314
FBgn0004889	tws	3R	10126129	10139772	-	5059	2288.74	452.409	2844.15	562.196	0.312415	0.14179	0.0275693	0.0662848	3336.22	659.461	0.536611	0.142465	0.000165473	0.000572892	2123.6	419.766	-0.109184	0.141877	0.441557	0.850297
FBgn0004892	sob	2L	3578013	3580769	-	2611	0	0	0	0	NA	NA	NA	NA	0	0	NA	NA	NA	NA	0	0	NA	NA	NA	NA
FBgn0004893	bowl	2L	3771700	3784121	+	4280	56.1095	13.1097	26.7692	6.25449	-1.08913	0.406508	0.00737918	0.0223224	55.025	12.8563	-0.148873	0.407478	0.714849	0.786585	108.851	25.4325	0.92366	0.386079	0.0167381	0.381912
FBgn0004895	FoxL1	3L	4018878	4021279	+	1414	0	0	0	0	NA	NA	NA	NA	0	0	NA	NA	NA	NA	0	0	NA	NA	NA	NA
FBgn0004896	fd59A	2R	22868159	22870706	+	2228	6.27725	2.81744	2.35265	1.05595	-1.54265	0.902405	0.0873605	0.168095	1.3576	0.609334	-1.96313	1.02308	0.055004	0.0984138	6.44928	2.89465	-0.0857692	0.808021	0.915465	0.984661
FBgn0004897	fd96Ca	3R	25082684	25084878	+	2195	0	0	0	0	NA	NA	NA	NA	0	0	NA	NA	NA	NA	0	0	NA	NA	NA	NA
FBgn0004898	fd96Cb	3R	25095012	25096099	+	1088	0	0	0	0	NA	NA	NA	NA	0	0	NA	NA	NA	NA	0	0	NA	NA	NA	NA
FBgn0004901	Prat	3R	7909598	7911779	-	2105	273.362	129.863	229.6	109.073	-0.247114	0.145352	0.089111	0.170738	211.035	100.254	-0.326781	0.152779	0.0324426	0.0625175	249.988	118.759	-0.122874	0.143475	0.39177	0.828012
FBgn0004903	Rb97D	3R	26872129	26875742	-	3286	844.843	257.104	804.191	244.732	-0.0663939	0.111212	0.550505	0.672392	853.605	259.77	0.00288878	0.114142	0.979809	0.986124	871.503	265.217	0.0482158	0.110525	0.66266	0.923741
FBgn0004907	14-3-3zeta	2R	10099677	10109687	+	3637	14050.5	3863.22	10353.8	2846.8	-0.440256	0.320875	0.170049	0.281562	13465.7	3702.41	-0.0619792	0.320944	0.846869	0.892598	11481.6	3156.87	-0.291086	0.320855	0.364291	0.819988
FBgn0004908	Arl2	3R	8341100	8341872	+	656	37.6995	57.4687	45.1626	68.8454	0.340553	0.344211	0.32248	0.456217	49.4502	75.3814	0.520236	0.355618	0.143493	0.21953	31.6375	48.2279	-0.171377	0.347815	0.622207	0.914767
FBgn0004910	Eip63F-1	3L	3909973	3935617	-	3545	0	0	2.54266	0.717253	3.40051	1.4398	0.0181865	0.0472554	5.36589	1.51365	4.26097	1.43611	0.0030071	0.00789429	0.880006	0.248239	1.86405	1.54377	0.227251	0.740459
FBgn0004911	asRNA:Eig63F-2	3L	3934718	3935992	+	1275	0	0	0	0	NA	NA	NA	NA	0	0	NA	NA	NA	NA	0	0	NA	NA	NA	NA
FBgn0004913	Gnf1	3R	4906622	4910081	+	3274	1132.15	345.8	1023.48	312.607	-0.140526	0.19337	0.467395	0.59904	550.088	168.017	-1.05504	0.197727	9.51198e-08	5.85656e-07	987.959	301.759	-0.191688	0.19319	0.32109	0.805768
FBgn0004914	Hnf4	2L	8687226	8709611	-	5377	1121.45	208.564	1187.08	220.77	0.0816817	0.354202	0.81762	0.87958	2515.63	467.85	1.15964	0.354282	0.0010633	0.00310054	1113.81	207.144	-0.0103003	0.354134	0.976796	0.998278
FBgn0004915	TfIIB	2L	10431338	10433116	+	1604	427.9	266.77	542.066	337.947	0.353691	0.153714	0.021393	0.0540164	567.906	354.056	0.404957	0.157116	0.00995328	0.0226614	431.537	269.038	0.02515	0.153906	0.870194	0.975161
FBgn0004919	gol	2R	25072627	25084347	-	4156	6.55516	1.57728	12.2376	2.94455	0.824749	0.647312	0.202623	0.321579	5.72222	1.37686	0.0764359	0.707467	0.913963	0.93948	3.39409	0.816673	-1.02837	0.715419	0.150594	0.69272
FBgn0004921	Ggamma1	2R	8901404	8904791	+	2773	1452.22	523.7	1037.62	374.189	-0.482759	0.202194	0.0169588	0.0445205	1429.65	515.562	-0.0314643	0.203103	0.876886	0.91435	1464.71	528.203	0.0148112	0.20166	0.941451	0.988714
FBgn0004924	Top1	X	15319479	15328029	+	6250	3878.47	620.555	3341.05	534.568	-0.214097	0.183898	0.244336	0.369935	3109.33	497.492	-0.323669	0.184584	0.0795155	0.134335	3171.33	507.412	-0.289365	0.183846	0.115499	0.668083
FBgn0004926	eIF2beta	3L	12525093	12526731	-	1128	6339.85	5620.44	2221.1	1969.06	-1.51277	0.488449	0.00195435	0.00719242	2365.88	2097.42	-1.42389	0.488763	0.00357688	0.00919812	3703.67	3283.4	-0.775017	0.488322	0.11249	0.663727
FBgn0004956	upd1	X	18305354	18309291	-	3125	890.649	285.008	922.442	295.182	0.0446817	0.20617	0.828425	0.887638	939.521	300.647	0.0730625	0.207962	0.725344	0.795649	1161.23	371.595	0.37662	0.205687	0.0670946	0.5936
FBgn0004957	por	X	18377521	18379854	-	2334	37.7554	16.1763	23.7195	10.1626	-0.599023	0.333344	0.0723337	0.144588	27.6602	11.851	-0.406157	0.348798	0.244243	0.340115	29.2195	12.5191	-0.304021	0.322457	0.34577	0.814457
FBgn0004959	phm	X	18685766	18688433	+	2203	0	0	0.315954	0.14342	0.2168	4.40736	0.960767	NA	0	0	0	4.40736	1	NA	0	0	0	4.40736	1	NA
FBgn0005198	gig	3L	20129181	20139010	+	5795	532.012	91.8054	539.755	93.1416	0.0114874	0.192075	0.95231	0.971401	548.835	94.7084	0.0370554	0.195138	0.849393	0.894633	504.612	87.0771	-0.0864279	0.191811	0.652285	0.922096
FBgn0005278	Sam-S	2L	106903	114432	+	3559	2028.36	569.925	1138.66	319.939	-0.835667	0.12416	1.68985e-11	3.41629e-10	848.248	238.339	-1.25534	0.12771	8.39463e-23	2.68658e-21	1920.83	539.711	-0.0820953	0.123176	0.505099	0.876636
FBgn0005322	nmd	2L	10302173	10303947	-	1719	256.595	149.27	117.877	68.5727	-1.11628	0.206784	6.72752e-08	7.45792e-07	108.523	63.1318	-1.28131	0.218507	4.52059e-09	3.39776e-08	206.751	120.274	-0.299434	0.200769	0.135848	0.681736
FBgn0005355	Su(fu)	3R	12689873	12691468	-	1596	137.828	86.3583	306.327	191.934	1.16796	0.236023	7.47857e-07	6.96129e-06	279.078	174.861	1.07475	0.24089	8.13651e-06	3.63195e-05	157.961	98.9733	0.214628	0.238428	0.368024	0.820131
FBgn0005386	ash1	3L	19590773	19598755	-	7615	511.637	67.188	427.343	56.1186	-0.267292	0.299944	0.372855	0.50827	440.949	57.9054	-0.220296	0.302541	0.46652	0.56883	564.776	74.1663	0.134293	0.299159	0.653502	0.922167
FBgn0005390	fs(1)M3	X	5958207	5964247	-	5690	0	0	0	0	NA	NA	NA	NA	0	0	NA	NA	NA	NA	0	0	NA	NA	NA	NA
FBgn0005391	Yp2	X	10050951	10052636	-	1618	0.365022	0.225601	0.230361	0.142374	-0.744982	2.37424	0.75369	NA	0.276259	0.170741	0.0710517	2.33214	0.975695	NA	0.672421	0.415588	0.497657	2.22334	0.822887	NA
FBgn0005411	U2af50	X	16356696	16359039	-	1646	591.989	359.653	655.779	398.408	0.154917	0.235197	0.510109	0.636722	818.485	497.257	0.466661	0.23671	0.0486728	0.0884845	459.27	279.022	-0.358951	0.235559	0.127552	0.670486
FBgn0005427	ewg	X	268509	279718	-	6973	696.361	99.8654	408.55	58.5902	-0.774457	0.294229	0.00848445	0.0251421	315.965	45.3126	-1.13601	0.298531	0.000141603	0.00049594	959.853	137.653	0.457057	0.292747	0.118461	0.669019
FBgn0005533	RpS17	3L	9428795	9429821	-	535	4934.33	9223.05	1127.02	2106.59	-2.12998	0.613269	0.000514355	0.00230392	2493.97	4661.63	-0.986662	0.613299	0.107665	0.172344	2582.81	4827.68	-0.933515	0.613015	0.127802	0.670486
FBgn0005536	Mbs	3L	16051959	16082026	+	8262	1423.6	172.307	1980.66	239.731	0.474088	0.280857	0.0914104	0.174076	2676.42	323.943	0.904768	0.281231	0.00129461	0.00370936	1394.81	168.823	-0.0320318	0.280954	0.909229	0.983703
FBgn0005558	ey	4	697689	721173	+	3720	0.693401	0.186398	1.46776	0.394559	0.879747	1.73433	0.611975	0.721514	1.10504	0.297053	0.779939	1.80188	0.665126	0.747865	2.20548	0.592872	1.44111	1.68842	0.393369	NA
FBgn0005561	sv	4	1088798	1113317	+	5213	0	0	0.252983	0.0485292	0.216791	4.40736	0.960769	NA	0.25256	0.0484482	0.99253	4.38784	0.821046	NA	0	0	0	4.40736	1	NA
FBgn0005564	Shal	3L	19566851	19584568	-	4606	2.00692	0.435718	0.884891	0.192117	-1.5006	1.30585	0.2505	0.377187	1.3102	0.284455	-0.433067	1.23446	0.725727	0.795718	4.96252	1.0774	1.10029	1.06214	0.300241	0.796086
FBgn0005585	Calr	3R	9628691	9630851	-	1677	10870.2	6481.94	4038.02	2407.88	-1.42813	0.157917	1.51669e-19	8.80553e-18	3817.89	2276.62	-1.51142	0.158557	1.53845e-21	4.52394e-20	10222.3	6095.58	-0.0880596	0.157627	0.576395	0.90181
FBgn0005586	Rab3	2R	10721335	10729203	-	3757	6.56207	1.74663	3.17947	0.846278	-1.14199	0.865837	0.187188	0.302257	3.12552	0.831919	-0.820413	0.899094	0.361512	0.465021	5.72502	1.52383	-0.297463	0.811101	0.713814	0.940773
FBgn0005590	scw	2L	19699379	19700968	-	1590	0	0	0	0	NA	NA	NA	NA	0	0	NA	NA	NA	NA	0	0	NA	NA	NA	NA
FBgn0005593	RpL7	2L	10201004	10202321	+	1167	13051.7	11184	3690.46	3162.35	-1.8222	0.469621	0.000104388	0.000567151	6446.77	5524.22	-1.01885	0.469679	0.0300642	0.0585826	8400.98	7198.78	-0.635438	0.46952	0.175935	0.707755
FBgn0005596	yem	3R	29118330	29122879	-	4239	167.509	39.5161	225.643	53.2303	0.405004	0.210711	0.0545957	0.115005	199.743	47.1203	0.20483	0.218168	0.3478	0.451488	153.713	36.2616	-0.151412	0.212097	0.475303	0.861432
FBgn0005612	Sox14	2R	23978801	23985177	+	3579	1701.33	475.366	7179.56	2006.02	2.0775	0.317457	5.98101e-11	1.10102e-09	15586.4	4354.96	3.19488	0.317468	8.00167e-24	2.75556e-22	1572.14	439.267	-0.113704	0.317802	0.720506	0.942665
FBgn0005613	Sox15	2R	14201390	14212413	-	3651	0	0	1.05228	0.288217	2.10614	2.11355	0.31901	NA	0.528819	0.144842	1.68091	2.19781	0.444385	NA	0.207585	0.0568569	-0.0223985	2.30869	0.992259	NA
FBgn0005614	trpl	2R	9753697	9765518	+	3893	0	0	0.460722	0.118346	0.962716	3.12234	0.75783	NA	0.552518	0.141926	1.71688	3.07985	0.577216	NA	0.690101	0.177267	1.49155	3.04435	0.624176	NA
FBgn0005616	msl-2	2L	3462218	3466112	-	3843	262.849	68.3968	251.331	65.3997	-0.0826095	0.216663	0.702994	0.793618	186.381	48.4989	-0.489632	0.225068	0.0295935	0.0577648	270.621	70.4191	0.0232036	0.215557	0.914278	0.984661
FBgn0005617	msl-1	2L	18683720	18688800	-	5021	2550.48	507.962	2513.62	500.622	-0.022827	0.140692	0.87111	0.917614	2098.79	418.001	-0.281158	0.142042	0.0477713	0.0871254	2593.43	516.516	0.0218226	0.140547	0.87661	0.976623
FBgn0005619	Hdc	2R	10237988	10246077	+	3826	0.693401	0.181234	1.97752	0.516864	1.25383	1.75218	0.474249	0.605292	0.757681	0.198035	0.368147	1.87444	0.844294	0.890402	0.415169	0.108513	-0.911619	1.9653	0.642749	NA
FBgn0005624	Psc	2R	12965997	12980994	-	6332	1736.17	274.189	1571.69	248.214	-0.144921	0.311242	0.641487	0.746074	2132.79	336.827	0.289638	0.311665	0.352721	0.456631	1455.7	229.896	-0.255642	0.311191	0.411363	0.837724
FBgn0005626	ple	3L	6713356	6719525	-	3806	1.05151	0.276276	16.2641	4.27328	4.28432	1.06535	5.78272e-05	0.000338115	57.3242	15.0615	6.06325	1.05886	1.02719e-08	7.30815e-08	2.70568	0.710898	1.66259	1.12908	0.14088	0.68625
FBgn0005631	robo1	2R	22692524	22700970	-	6791	1116.08	164.346	1448.04	213.229	0.372126	0.284506	0.190883	0.306692	2263.31	333.281	1.01575	0.284848	0.000362542	0.00117144	1150.92	169.477	0.0404758	0.284546	0.886885	0.979582
FBgn0005632	faf	3R	31777020	31790681	+	10488	2810.07	267.932	2681.36	255.66	-0.0695241	0.202011	0.730725	0.815851	2124.82	202.595	-0.405895	0.203003	0.0455597	0.0836985	2757.11	262.882	-0.0295133	0.201918	0.883791	0.978198
FBgn0005633	fln	3L	19989551	19991220	-	1300	0	0	0.252983	0.194602	0.21679	4.40736	0.960769	NA	0.276259	0.212507	1.06219	4.3837	0.808545	NA	0	0	0	4.40736	1	NA
FBgn0005636	nvy	2R	24275734	24291084	+	3502	3.24164	0.925654	8.43218	2.40782	1.35073	0.72158	0.0612198	0.126331	48.0257	13.7138	3.78068	0.693398	4.96945e-08	3.19435e-07	3.98655	1.13836	0.260792	0.756549	0.730311	0.94581
FBgn0005638	slbo	2R	24331522	24334307	-	2786	12.8691	4.61919	7.90739	2.83826	-0.816043	0.524542	0.119774	0.214428	1.86272	0.668599	-2.48339	0.72522	0.000616312	0.00189604	11.6387	4.17758	-0.254541	0.495442	0.607416	0.909127
FBgn0005640	Eip63E	3L	3515751	3610521	+	6544	365.782	55.8958	780.958	119.339	1.10112	0.252728	1.31904e-05	9.16143e-05	1226.08	187.359	1.73928	0.253421	6.7336e-12	7.20027e-11	378.555	57.8477	0.0558379	0.25376	0.825839	0.963903
FBgn0005642	wdn	3R	28807983	28811337	-	3184	127.354	39.9982	242.561	76.1812	0.903534	0.318101	0.00450568	0.0147003	269.588	84.6696	1.02661	0.321842	0.0014237	0.00403835	165.759	52.06	0.354463	0.318932	0.266393	0.76804
FBgn0005648	Pabp2	2R	8131431	8134374	+	2138	8617.54	4030.66	3573.66	1671.5	-1.26957	0.482481	0.00850475	0.0251889	3004.89	1405.47	-1.52187	0.482775	0.00161973	0.00454035	5223.43	2443.14	-0.721944	0.482413	0.134516	0.679054
FBgn0005649	Rox8	3R	24043056	24048265	-	4010	3076.72	767.262	2910.38	725.781	-0.0773959	0.146258	0.596684	0.70987	2091.63	521.604	-0.555796	0.147677	0.0001675	0.000579469	2701.54	673.7	-0.185011	0.146197	0.205695	0.729382
FBgn0005654	Orc3	2R	13202728	13206547	-	3315	0	0	0	0	NA	NA	NA	NA	0	0	NA	NA	NA	NA	0	0	NA	NA	NA	NA
FBgn0005655	PCNA	2R	20261754	20262883	-	1070	622.022	581.329	821.319	767.588	0.394499	0.133717	0.00317504	0.0108537	684.143	639.386	0.141284	0.137447	0.303989	0.405542	654.476	611.66	0.0674523	0.133859	0.614328	0.912367
FBgn0005658	Ets65A	3L	6097617	6123913	+	4922	0	0	0	0	NA	NA	NA	NA	0	0	NA	NA	NA	NA	0	0	NA	NA	NA	NA
FBgn0005659	Ets98B	3R	27736538	27748366	+	3522	0	0	1.99635	0.566822	3.07758	1.39279	0.0271295	0.0654883	29.9071	8.49152	6.83908	1.30929	1.75557e-07	1.03517e-06	0	0	0	1.74973	1	1
FBgn0005660	Ets21C	2L	544925	552923	-	5407	98.6683	18.2482	44.0387	8.14475	-1.19667	0.370189	0.00122666	0.00490069	38.2669	7.07728	-1.39099	0.389385	0.00035388	0.00114754	78.0098	14.4276	-0.37121	0.361194	0.304076	0.797473
FBgn0005664	Crys	2L	11944129	11947131	+	2261	0	0	0.315954	0.139741	0.2168	4.40736	0.960767	NA	0	0	0	4.40736	1	NA	0	0	0	4.40736	1	NA
FBgn0005666	bt	4	724400	776474	+	28019	1.05151	0.0375284	1.26002	0.0449702	0.554051	1.49157	0.710298	0.799152	0.78138	0.0278875	0.306203	1.57621	0.845968	0.891855	1.74402	0.0622441	1.00834	1.43586	0.482518	NA
FBgn0005670	Cyp4d1	X	2159145	2162180	-	2285	0	0	0	0	NA	NA	NA	NA	0	0	NA	NA	NA	NA	0	0	NA	NA	NA	NA
FBgn0005671	Vha55	3R	12623762	12627829	-	2786	1954.92	701.694	1222.44	438.78	-0.678821	0.18673	0.000277659	0.00135348	1109.44	398.22	-0.811552	0.18854	1.67434e-05	7.05983e-05	1866.85	670.083	-0.0683486	0.186185	0.713544	0.940773
FBgn0005672	spi	2L	19567900	19577315	-	1817	1756.29	966.586	1616.59	889.704	-0.116398	0.152494	0.445284	0.578365	1179.27	649.022	-0.558718	0.154777	0.000306387	0.00100761	1585.05	872.344	-0.144597	0.152334	0.342513	0.813782
FBgn0005674	GluProRS	3R	23952136	23958391	-	5453	1102.36	202.157	384.677	70.5441	-1.5227	0.146864	3.4641e-25	3.41025e-23	291.216	53.4047	-1.93273	0.154442	6.23628e-36	5.22982e-34	825.738	151.428	-0.418001	0.143852	0.00366339	0.19573
FBgn0005677	dac	2L	16466512	16485998	-	4982	4.61461	0.926257	5.862	1.17664	0.446143	0.790457	0.572474	0.690399	7.62378	1.53027	0.956938	0.804646	0.234335	0.328287	5.95028	1.19436	0.441509	0.781492	0.572103	0.901655
FBgn0005683	pie	2L	10420625	10422780	-	2089	159.918	76.5523	93.5777	44.7954	-0.751981	0.318521	0.0182331	0.0473173	93.5335	44.7743	-0.838313	0.329065	0.0108479	0.0243795	101.214	48.4508	-0.640004	0.316471	0.043144	0.531146
FBgn0005694	Aef1	3L	21433422	21438639	+	4007	1042	260.045	786.899	196.381	-0.402698	0.264704	0.128182	0.226084	1097.36	273.86	0.0630794	0.265613	0.812279	0.865202	854.227	213.184	-0.284528	0.264405	0.281881	0.780023
FBgn0005695	gcl	2R	8724258	8728999	+	2509	85.8898	34.2327	196.009	78.1223	1.1759	0.326179	0.000312049	0.00149611	271.121	108.059	1.67821	0.328682	3.29277e-07	1.8466e-06	103.018	41.0596	0.247386	0.328776	0.451783	0.852246
FBgn0005696	DNApol-alpha73	3R	27239163	27241228	+	2066	49.1036	23.7675	66.8134	32.3395	0.443881	0.267136	0.0965873	0.181417	42.813	20.7226	-0.143295	0.290059	0.621293	0.709769	43.8725	21.2355	-0.156793	0.271452	0.56353	0.898013
FBgn0005771	noc	2L	14490859	14494019	+	2859	4205.64	1471.02	2728.19	954.245	-0.624055	0.412933	0.130718	0.229752	4156.06	1453.67	-0.0195868	0.413071	0.96218	0.973863	3156.97	1104.22	-0.413466	0.412865	0.316607	0.805517
FBgn0005775	Con	3L	4936758	5079033	-	5947	15.5313	2.61163	27.4393	4.61397	0.905849	0.642933	0.158855	0.267575	160.285	26.9523	3.40798	0.633567	7.48869e-08	4.69053e-07	8.64046	1.45291	-0.758642	0.668606	0.256517	0.765083
FBgn0005777	PpD3	3R	9747875	9751094	+	2509	890.27	354.831	491.455	195.877	-0.850342	0.165599	2.82202e-07	2.85257e-06	438.532	174.783	-0.995438	0.170053	4.80781e-09	3.59573e-08	755.567	301.143	-0.230054	0.164054	0.160825	0.69823
FBgn0005778	PpD5	2R	22041667	22042945	-	1279	0	0	0	0	NA	NA	NA	NA	0	0	NA	NA	NA	NA	0	0	NA	NA	NA	NA
FBgn0005779	PpD6	2L	3109672	3110998	+	1327	0	0	0	0	NA	NA	NA	NA	0	0	NA	NA	NA	NA	0	0	NA	NA	NA	NA
FBgn0008635	betaCOP	X	18381549	18385242	-	3203	1428.45	445.972	2124.8	663.379	0.572363	0.213328	0.00729604	0.0221152	2368.57	739.485	0.735974	0.213993	0.000583352	0.0018063	1298.84	405.508	-0.137638	0.213558	0.519252	0.880352
FBgn0008636	hbn	2R	20954668	20960909	-	1798	0	0	0.505966	0.281405	1.06199	3.71017	0.774696	NA	1.08134	0.601411	2.42325	3.65959	0.507867	NA	0	0	0	3.75081	1	NA
FBgn0008646	E5	3R	13867345	13874916	-	2122	0	0	0	0	NA	NA	NA	NA	0	0	NA	NA	NA	NA	0	0	NA	NA	NA	NA
FBgn0008651	lbl	3R	21409979	21434133	-	2744	0	0	0	0	NA	NA	NA	NA	0	0	NA	NA	NA	NA	0	0	NA	NA	NA	NA
FBgn0010014	CanB	X	5332499	5334449	+	1234	2.80333	2.27174	0.862269	0.69876	-1.83956	1.24025	0.138016	0.239283	1.86272	1.5095	-0.277339	1.10941	0.802597	0.857967	2.01558	1.63337	-0.517429	1.04384	0.620108	0.914203
FBgn0010015	CanA1	3R	31039374	31046821	+	3064	11.9067	3.88601	29.3855	9.59056	1.25208	0.427372	0.00339257	0.0114865	40.5034	13.2191	1.86447	0.432263	1.60855e-05	6.80141e-05	20.4674	6.67997	0.729627	0.432023	0.0912463	0.638734
FBgn0010019	Cyp4g1	X	467057	469335	-	2279	18.1632	7.96983	2.52004	1.10577	-2.83303	0.661148	1.82728e-05	0.000122319	2.17782	0.955605	-3.62461	0.853958	2.19094e-05	8.98701e-05	20.4917	8.99153	0.145819	0.498441	0.769867	0.953774
FBgn0010038	GstD2	3R	12371971	12372704	+	734	1.35016	1.83945	4.79579	6.53377	1.56442	1.0084	0.12081	0.215862	2.68295	3.65524	0.479459	1.12964	0.671248	0.753158	2.86528	3.90365	0.840533	1.03092	0.414886	0.839531
FBgn0010039	GstD3	3R	12373068	12373813	+	746	674.332	903.93	326.979	438.309	-1.04689	0.461759	0.0233788	0.0579847	127.899	171.446	-2.34836	0.470016	5.84291e-07	3.16314e-06	1061	1422.25	0.651348	0.460397	0.157141	0.694727
FBgn0010040	GstD4	3R	12374100	12374824	+	725	4.94991	6.82746	2.28968	3.15818	-1.1019	0.812939	0.175274	0.287437	0.805078	1.11045	-2.17913	1.03655	0.0355277	0.0676427	7.18736	9.9136	0.518606	0.700642	0.459187	0.853554
FBgn0010041	GstD5	3R	12375733	12376572	+	840	23.9531	28.5156	10.7193	12.7611	-1.21466	0.535736	0.0233729	0.0579847	12.5793	14.9754	-0.94076	0.557231	0.0913584	0.150552	26.0564	31.0195	0.103403	0.502146	0.836851	0.966903
FBgn0010042	GstD6	3R	12377128	12377907	+	780	6.81717	8.73996	7.35238	9.42613	-0.0127169	0.612023	0.983422	0.990972	9.82531	12.5965	0.446037	0.625424	0.475738	0.576808	14.1458	18.1356	0.914334	0.577664	0.113464	0.665314
FBgn0010043	GstD7	3R	12378500	12379255	+	756	10.0083	13.2385	3.57232	4.72529	-1.49503	0.667601	0.0251297	0.0614968	2.06788	2.73529	-1.88104	0.767961	0.0143099	0.0309763	11.3764	15.0482	0.154371	0.57915	0.789818	0.956169
FBgn0010044	GstD8	3R	12380008	12380815	+	808	1.05842	1.30993	0.460722	0.570201	-1.24342	1.78322	0.485621	NA	0.276259	0.341905	-1.2608	1.81075	0.486251	NA	1.792	2.21782	0.597005	1.53085	0.69655	NA
FBgn0010051	Itpr	3R	5517117	5539411	+	10331	281.171	27.2162	376.247	36.4192	0.408679	0.324988	0.208565	0.329319	377.744	36.5641	0.422219	0.327825	0.197767	0.286222	294.822	28.5376	0.0556116	0.325157	0.8642	0.974468
FBgn0010052	Jhe	2R	16119793	16122773	+	2101	0	0	0	0	0	4.40736	1	NA	0	0	0	4.40736	1	NA	0.241258	0.11483	-0.0223957	4.40736	0.995946	NA
FBgn0010053	Jheh1	2R	18853434	18855087	-	1486	7.00038	4.71089	3.19719	2.15154	-1.279	0.663776	0.053997	0.114024	1.58646	1.0676	-1.84936	0.799707	0.0207476	0.0427145	20.2206	13.6074	1.39791	0.538735	0.00946477	0.298227
FBgn0010078	RpL23	2R	22854383	22855694	+	542	11313.7	20873.9	3343.75	6169.28	-1.75828	0.473423	0.000204023	0.00103289	4903.37	9046.8	-1.20736	0.473531	0.0107818	0.0242431	7094.66	13089.8	-0.673002	0.473317	0.15506	0.69272
FBgn0010097	gammaTub37C	2L	19183863	19185726	-	1628	187.032	114.884	388.959	238.919	1.0371	0.238585	1.38074e-05	9.51702e-05	407.921	250.566	1.13332	0.241756	2.76058e-06	1.33489e-05	213.301	131.02	0.171321	0.240175	0.475649	0.861432
FBgn0010100	mAcon1	2L	21168570	21173185	+	3103	2935.67	946.073	1877.74	605.137	-0.645836	0.203614	0.00151464	0.00584137	1600.52	515.799	-0.867695	0.204846	2.2769e-05	9.30171e-05	2806.49	904.445	-0.0659355	0.203297	0.745687	0.947977
FBgn0010105	comm	3L	15721511	15728430	-	2495	1.42345	0.570519	0	0	-3.35553	2.64686	0.204891	NA	0	0	-2.56253	2.64686	0.332973	NA	1.34653	0.539691	-0.148695	2.44231	0.951453	NA
FBgn0010109	dpn	2R	8228971	8232330	-	2036	8.1376	3.99686	53.1594	26.1097	2.5034	0.497473	4.84774e-07	4.69081e-06	76.763	37.7029	3.04987	0.502039	1.24024e-09	1.00743e-08	15.7241	7.72305	0.740316	0.516593	0.151837	0.69272
FBgn0010113	hdc	3R	30277932	30372382	+	15063	10719.5	711.646	11067.8	734.765	0.0462007	0.32739	0.887777	0.929978	18595.4	1234.51	0.794008	0.327422	0.0153072	0.0328447	9067.58	601.977	-0.241373	0.327392	0.460965	0.853554
FBgn0010114	hig	2R	9227785	9247249	-	4332	0.365022	0.0842618	0.315954	0.0729349	-0.744987	1.97673	0.706264	0.796394	2.40669	0.55556	2.07507	1.72956	0.230229	0.323435	0.880006	0.203141	0.897792	1.74509	0.606925	NA
FBgn0010173	RpA-70	3R	8262120	8264451	-	2135	855.159	400.543	654.552	306.582	-0.386571	0.158513	0.0147385	0.0397031	300.644	140.817	-1.45978	0.166889	2.19032e-18	4.94706e-17	889.016	416.401	0.0548541	0.157496	0.727623	0.945347
FBgn0010194	Wnt5	X	18501401	18505405	-	4005	779.303	194.582	926.713	231.389	0.243889	0.253886	0.336741	0.470294	732.638	182.931	-0.0882869	0.256101	0.730294	0.799405	731.9	182.747	-0.096642	0.253963	0.703548	0.937771
FBgn0010197	Gyc32E	2L	11138759	11149101	-	3845	0.365022	0.0949342	0	0	-1.70674	4.40736	0.698573	NA	0	0	-0.913748	4.40736	0.835757	NA	0.241258	0.0627459	-0.984146	4.40736	0.823305	NA
FBgn0010198	RpS15Aa	X	13335637	13337705	-	944	2400.27	2542.66	833.637	883.09	-1.52459	0.473646	0.00128712	0.00509502	1333.53	1412.64	-0.852691	0.473986	0.0720223	0.123707	1524.73	1615.18	-0.653529	0.473267	0.167313	0.702081
FBgn0010213	Sod2	2R	16772785	16773915	-	1015	733.115	722.28	607.158	598.186	-0.271342	0.309866	0.381205	0.516698	522.487	514.766	-0.465079	0.31226	0.136383	0.210501	793.751	782.02	0.115489	0.30934	0.708895	0.938704
FBgn0010215	alpha-Cat	3L	23318646	23338100	-	3487	1498.03	429.604	1272.25	364.855	-0.236872	0.121639	0.0514952	0.109636	1220.86	350.117	-0.286159	0.123863	0.0208725	0.042925	1780.2	510.525	0.247341	0.120925	0.0408155	0.523553
FBgn0010217	ATPsynbeta	4	1031484	1034917	+	2386	3584.53	1502.32	1533.29	642.619	-1.22376	0.145898	4.95372e-17	2.11632e-15	1184.51	496.442	-1.59127	0.148208	6.84435e-27	2.99465e-25	2787.12	1168.11	-0.361125	0.145231	0.0128984	0.34935
FBgn0010220	Dbp45A	2R	9087834	9089802	+	1670	497.612	297.972	422.592	253.049	-0.224647	0.184635	0.223716	0.346773	264.388	158.316	-0.859783	0.192189	7.69e-06	3.44453e-05	444.562	266.205	-0.151224	0.183926	0.410964	0.837437
FBgn0010222	Nmdmc	3R	9042508	9050555	-	1516	73.5676	48.5274	42.9569	28.3357	-0.793366	0.260123	0.00228868	0.00824852	37.1386	24.4977	-0.959447	0.280387	0.000621937	0.0019114	66.0497	43.5684	-0.178012	0.248872	0.474439	0.861379
FBgn0010223	Galphaf	3L	16662557	16667934	-	1825	28.6534	15.7005	43.6616	23.9242	0.584435	0.475386	0.218925	0.341274	91.9015	50.357	1.5489	0.47685	0.00116139	0.00335312	21.0577	11.5385	-0.46894	0.485259	0.333859	0.807721
FBgn0010225	Gel	3R	4235217	4241057	+	3376	622.152	184.287	201.32	59.6326	-1.61932	0.154522	1.07306e-25	1.1044e-23	245.834	72.8181	-1.32936	0.15944	7.57895e-17	1.48899e-15	622.293	184.329	0.00270708	0.147966	0.985403	0.999184
FBgn0010226	GstS1	2R	17093246	17099501	-	2275	230.669	101.393	266.311	117.06	0.184245	0.215633	0.392863	0.528073	255.359	112.246	0.129299	0.221201	0.558862	0.654632	280.284	123.202	0.258207	0.214669	0.229046	0.742557
FBgn0010228	HmgZ	2R	21697488	21707861	-	1604	13102.6	8168.68	5857.03	3651.52	-1.16144	0.54072	0.0317172	0.0741705	8217.86	5123.35	-0.673668	0.540781	0.212863	0.303762	9108.96	5678.9	-0.524307	0.54068	0.332187	0.807512
FBgn0010235	Klc	3L	12746616	12750056	-	2065	573.522	277.734	703.835	340.84	0.290785	0.171473	0.0899221	0.172001	618.053	299.299	0.132573	0.174729	0.448011	0.551759	532.958	258.091	-0.110356	0.171729	0.520472	0.88068
FBgn0010238	Lac	2R	12453190	12465630	+	2156	1993.11	924.448	997.461	462.644	-0.99791	0.348628	0.00420451	0.0138323	1821.52	844.861	-0.13653	0.348866	0.695535	0.77313	1675.34	777.06	-0.249829	0.348229	0.473112	0.860996
FBgn0010240	Lcch3	X	15925105	15928529	+	1903	0	0	0	0	NA	NA	NA	NA	0	0	NA	NA	NA	NA	0	0	NA	NA	NA	NA
FBgn0010241	Mdr50	2R	14246966	14252597	+	4256	2.13966	0.502739	1.30526	0.306688	-0.523194	1.39905	0.708431	0.797559	0.25256	0.0593422	-1.95699	1.65773	0.237791	0.33246	0.897685	0.210922	-1.07131	1.43431	0.455115	NA
FBgn0010246	Myo61F	3L	1318480	1329617	+	3955	346.189	87.532	408.711	103.34	0.228894	0.31991	0.474303	0.605292	545.264	137.867	0.65467	0.321426	0.0416737	0.0776782	352.057	89.0157	0.0132471	0.319862	0.966965	0.995169
FBgn0010247	Parp	3R	3461351	3587054	-	3112	35.1284	11.288	199.531	64.1165	2.46279	0.258394	1.55598e-21	1.1274e-19	136.548	43.8777	1.98462	0.267412	1.15736e-13	1.51476e-12	37.3562	12.0039	0.0454401	0.276534	0.869479	0.975161
FBgn0010258	Rbp4	3R	13654556	13656394	-	1515	4.56207	3.01127	1.01193	0.667942	-2.23357	1.32971	0.0930077	0.176512	0.552518	0.364698	-2.6119	1.44762	0.0711882	0.12253	5.18946	3.42539	0.0918941	1.15176	0.936407	0.988714
FBgn0010263	Rbp9	2L	2954762	2968434	+	8054	3.17527	0.394248	2.18147	0.270855	-0.625804	1.14113	0.583413	0.69966	5.5796	0.692774	0.751267	1.11221	0.499375	0.599131	1.69266	0.210164	-1.00321	1.15168	0.38371	0.82455
FBgn0010265	RpS13	2L	8363477	8364662	-	899	15991	17787.6	4646.72	5168.76	-1.78286	0.420476	2.23425e-05	0.00014558	5743.99	6389.31	-1.47854	0.420607	0.000439335	0.00139274	10408.4	11577.8	-0.619358	0.420387	0.140669	0.68625
FBgn0010269	Dsor1	X	9247342	9250037	+	1799	167.711	93.2246	215.273	119.663	0.347435	0.260562	0.182399	0.296161	290.598	161.533	0.824039	0.263376	0.0017555	0.00488167	220.456	122.544	0.382916	0.25968	0.140329	0.68625
FBgn0010278	Ssrp	2R	23806361	23809004	-	2507	5832.3	2326.41	4797.24	1913.54	-0.281265	0.354106	0.427023	0.560921	3162.74	1261.56	-0.884194	0.354529	0.0126314	0.0278624	4390.56	1751.32	-0.409013	0.354092	0.248048	0.755767
FBgn0010280	Taf4	3L	16113212	16121651	+	5516	1743.85	316.145	1917.99	347.714	0.136385	0.222161	0.53928	0.662773	2651.76	480.739	0.597612	0.222619	0.00726478	0.0172424	1693.68	307.048	-0.043351	0.222131	0.845268	0.9695
FBgn0010282	TfIIFalpha	3R	6380467	6382604	+	1938	2488.03	1283.81	1476.26	761.744	-0.751601	0.309316	0.0151038	0.0405401	1262.78	651.591	-0.982271	0.310378	0.0015521	0.00437106	2056	1060.88	-0.27348	0.309075	0.376247	0.821857
FBgn0010287	Trf	2L	8072895	8073948	+	983	10.5863	10.7694	10.464	10.6449	0.006819	0.5401	0.989927	0.994649	9.5813	9.747	0.0642275	0.568157	0.909995	0.936855	12.0881	12.2971	0.207889	0.527236	0.693359	0.934254
FBgn0010288	Uch	2L	2212738	2214211	-	1196	786.249	657.399	897.511	750.427	0.187448	0.256828	0.465476	0.597819	842.098	704.095	0.110915	0.258545	0.667926	0.750174	827.031	691.498	0.0697989	0.256723	0.785711	0.956019
FBgn0010292	bys	X	7901880	7903643	+	1518	88.4353	58.2577	83.0014	54.6781	-0.132624	0.209763	0.527218	0.65178	71.9885	47.4232	-0.30192	0.223731	0.177184	0.261873	111.62	73.5306	0.299848	0.203745	0.141106	0.68625
FBgn0010294	ng2	X	3240026	3240571	-	546	0	0	0	0	NA	NA	NA	NA	0	0	NA	NA	NA	NA	0	0	NA	NA	NA	NA
FBgn0010295	ng3	X	3241491	3242084	-	594	0	0	0	0	NA	NA	NA	NA	0	0	NA	NA	NA	NA	0	0	NA	NA	NA	NA
FBgn0010296	ng4	X	3243954	3244220	-	267	0	0	0	0	NA	NA	NA	NA	0	0	NA	NA	NA	NA	0	0	NA	NA	NA	NA
FBgn0010300	brat	2L	19133816	19179758	+	12788	3752.32	293.425	3984.91	311.614	0.0863053	0.265643	0.745263	0.82658	6373.82	498.422	0.76156	0.26577	0.00416374	0.0105274	3336.41	260.902	-0.170058	0.265645	0.522062	0.881342
FBgn0010303	hep	X	13079205	13090434	-	6215	1773.69	285.389	1699.64	273.475	-0.0606793	0.379677	0.873024	0.918989	2583.09	415.622	0.538369	0.379919	0.156465	0.236207	1218.13	195.998	-0.541266	0.379752	0.154066	0.69272
FBgn0010309	pigeon	2L	19186043	19189938	+	3334	60.2443	18.0697	73.0089	21.8983	0.227077	0.331187	0.492936	0.621367	62.6788	18.7999	0.0786021	0.344237	0.819384	0.870109	63.8144	19.1405	0.0296885	0.330807	0.928489	0.986687
FBgn0010313	corto	3R	5077779	5087072	-	9294	831.638	89.4812	1530.32	164.657	0.882048	0.538782	0.101607	0.188615	5014.04	539.493	2.59256	0.53869	1.48891e-06	7.57588e-06	533.391	57.3909	-0.638507	0.539257	0.236394	0.749364
FBgn0010314	Cks30A	2L	9330763	9331981	+	1147	1047.93	913.625	1224.01	1067.14	0.227785	0.175417	0.194106	0.310624	1480.12	1290.43	0.489806	0.176588	0.0055418	0.0135618	1029.47	897.532	-0.0220323	0.175418	0.90005	0.981519
FBgn0010315	CycD	X	15906822	15909676	-	2453	446.55	182.043	579.607	236.285	0.361385	0.130244	0.00552563	0.0174801	437.836	178.49	-0.019786	0.13587	0.884218	0.918917	473.791	193.148	0.0714143	0.130355	0.583799	0.903723
FBgn0010316	dap	2R	9712321	9716256	+	2530	513.633	203.017	760.037	300.41	0.560362	0.292488	0.0553846	0.116277	946.782	374.222	0.863922	0.29359	0.00325459	0.00847279	555.157	219.43	0.1068	0.292678	0.715181	0.941341
FBgn0010317	CycJ	3L	3466428	3468098	+	1478	2.73696	1.8518	1.39086	0.94104	-1.11829	1.47134	0.447223	0.58009	0.276259	0.186914	-2.57941	1.71906	0.13349	0.206741	0.431163	0.291721	-2.74696	1.67843	0.101709	NA
FBgn0010323	Gsc	2L	583540	594685	-	2584	0	0	0	0	NA	NA	NA	NA	0	0	NA	NA	NA	NA	0	0	NA	NA	NA	NA
FBgn0010328	woc	3R	27256595	27264055	-	6332	2276.55	359.532	2245.95	354.699	-0.0198646	0.171015	0.907528	0.94325	2160.5	341.204	-0.0856595	0.172039	0.618549	0.707442	2216.17	349.995	-0.0392219	0.170909	0.818488	0.96273
FBgn0010329	Tbh	X	7995697	8027394	+	3868	0.328379	0.0848964	2.50231	0.646927	2.41878	1.57886	0.125527	0.222322	3.44063	0.88951	2.79814	1.60445	0.0811619	0.13676	1.2615	0.326138	1.44634	1.62337	0.372959	0.821574
FBgn0010333	Rac1	3L	1300879	1302683	-	1805	1508.37	835.66	1240.8	687.422	-0.27867	0.307939	0.365491	0.50068	1483.98	822.152	-0.024899	0.308643	0.935702	0.955214	1228.29	680.496	-0.293214	0.30783	0.340833	0.813441
FBgn0010339	128up	2R	12037298	12038851	+	1304	189.404	145.248	89.9693	68.9949	-1.05578	0.284206	0.00020333	0.00103053	56.467	43.3029	-1.65338	0.303389	5.04529e-08	3.24079e-07	158.021	121.182	-0.239259	0.278499	0.390284	0.827139
FBgn0010340	140up	3R	14124163	14125548	-	1200	87.2897	72.7414	62.0492	51.7077	-0.522099	0.231273	0.023977	0.0592847	68.7891	57.3242	-0.462629	0.243477	0.0574211	0.101993	94.4186	78.6822	0.087083	0.222528	0.69555	0.934717
FBgn0010341	Cdc42	X	19697091	19699938	+	2078	2329.04	1120.81	1993.96	959.559	-0.222388	0.288142	0.440232	0.573118	2081	1001.44	-0.1648	0.28875	0.568179	0.663315	1674.61	805.876	-0.474044	0.288143	0.0999343	0.643921
FBgn0010342	Map60	2R	9590867	9592744	+	1814	1373	756.891	1457.33	803.381	0.0903906	0.254818	0.722795	0.809291	1213.7	669.076	-0.172739	0.256153	0.500084	0.599647	1157.85	638.285	-0.241511	0.254862	0.343326	0.813782
FBgn0010348	Arf79F	3L	22868380	22872231	-	2442	9350.89	3829.19	14810.4	6064.86	0.663999	0.134997	8.71512e-07	8.01967e-06	15907.5	6514.12	0.768155	0.135163	1.32218e-08	9.27577e-08	9187.93	3762.46	-0.0247495	0.135046	0.854588	0.971991
FBgn0010350	Cds	3L	8127762	8131675	+	2609	144.592	55.4204	148.892	57.0685	0.0194143	0.275121	0.943743	0.965598	193.3	74.0898	0.364007	0.279628	0.193001	0.28076	173.31	66.4276	0.235662	0.273262	0.388466	0.826511
FBgn0010352	Nc73EF	3L	16954822	16968724	+	5338	1317.76	246.863	1328.84	248.94	0.00905351	0.227862	0.968307	0.981418	1250.38	234.241	-0.0702245	0.229184	0.759292	0.823838	1326.29	248.462	0.00630318	0.227719	0.977918	0.998278
FBgn0010355	Taf1	3R	6646889	6656048	+	6876	685.09	99.6349	756.816	110.066	0.136364	0.21604	0.52791	0.652467	815.162	118.552	0.251097	0.217898	0.249173	0.345282	622.774	90.5722	-0.145347	0.216079	0.501165	0.873914
FBgn0010356	Taf5	2R	10877312	10879673	-	2362	91.6547	38.8039	191.491	81.0718	1.04049	0.22961	5.85558e-06	4.46039e-05	238.112	100.809	1.30136	0.234107	2.71584e-08	1.81263e-07	82.1175	34.7661	-0.181695	0.235607	0.440601	0.850297
FBgn0010357	betaTry	2R	11346325	11347395	+	1071	0	0	0	0	NA	NA	NA	NA	0	0	NA	NA	NA	NA	0	0	NA	NA	NA	NA
FBgn0010358	deltaTry	2R	11355319	11356128	+	810	0	0	0	0	NA	NA	NA	NA	0	0	NA	NA	NA	NA	0	0	NA	NA	NA	NA
FBgn0010359	gammaTry	2R	11349061	11349870	-	810	0	0	0	0	NA	NA	NA	NA	0	0	NA	NA	NA	NA	0	0	NA	NA	NA	NA
FBgn0010379	Akt1	3R	16099228	16105670	+	4889	1264.45	258.633	1865.41	381.553	0.563013	0.216321	0.00924989	0.0270367	3220.51	658.726	1.34526	0.216573	5.24527e-10	4.45234e-09	1145.6	234.322	-0.140485	0.216575	0.516554	0.879603
FBgn0010380	AP-1-2beta	X	19731004	19734581	+	3228	628.243	194.623	809.238	250.693	0.358971	0.174678	0.0398745	0.0891508	961.508	297.865	0.622147	0.176378	0.000419726	0.00133713	653.324	202.393	0.0502988	0.174761	0.773489	0.954154
FBgn0010382	CycE	2L	15727581	15748150	-	5047	475.99	94.3114	694.395	137.586	0.539655	0.230083	0.0190027	0.0489637	711.225	140.92	0.55084	0.232248	0.0177028	0.0371918	493.45	97.771	0.0466246	0.230403	0.839634	0.966983
FBgn0010383	Cyp18a1	X	18688538	18693042	-	3049	482.864	158.368	592.474	194.318	0.286214	0.30177	0.3429	0.476107	524.563	172.044	0.113482	0.304221	0.709129	0.783511	656.736	215.394	0.43475	0.301396	0.149175	0.69272
FBgn0010385	Def	2R	10054178	10054576	-	399	0	0	0	0	NA	NA	NA	NA	0	0	NA	NA	NA	NA	0	0	NA	NA	NA	NA
FBgn0010387	Acbp2	3L	7131863	7133463	+	432	1.42345	3.29501	1.36824	3.16721	-0.279313	1.22598	0.819779	0.881466	2.39154	5.53596	0.901039	1.18014	0.445163	0.548728	2.00127	4.63257	0.31073	1.15041	0.787081	0.956019
FBgn0010388	Dro	2R	14745961	14746714	+	754	1.41653	1.87869	3.95125	5.24038	1.61387	1.13737	0.155916	0.263625	3.978	5.27586	1.9347	1.1607	0.0955466	0.156147	2.29388	3.04228	0.81511	1.16596	0.484497	0.86314
FBgn0010389	htl	3R	18045216	18052984	-	4094	4.81025	1.17495	4.64723	1.13513	-0.145315	0.789699	0.854003	0.905067	7.90622	1.93117	0.142943	0.817596	0.86121	0.903822	7.51533	1.83569	0.531314	0.753845	0.480931	0.86314
FBgn0010391	SrpRalpha	X	11126877	11129087	-	2056	397.259	193.219	203.874	99.1604	-0.954447	0.344787	0.00563633	0.0177745	305.137	148.413	-0.407234	0.346958	0.240504	0.335734	250.755	121.963	-0.656216	0.343542	0.0561143	0.563823
FBgn0010395	Itgbn	2L	21053033	21058044	+	3340	220.434	65.9981	461.915	138.298	1.05203	0.314042	0.00080824	0.00342707	363.051	108.698	0.724673	0.317551	0.0224853	0.0457948	248.135	74.2919	0.155739	0.315122	0.621152	0.914767
FBgn0010397	LamC	2R	14570810	14575771	-	2450	71.6657	29.2513	82.1989	33.5506	0.154321	0.218757	0.480533	0.610572	126.537	51.6477	0.806356	0.221442	0.000271182	0.000900327	83.0561	33.9005	0.164608	0.216287	0.446618	0.851275
FBgn0010398	Lrr47	2L	10517335	10519269	+	1874	30.7648	16.4166	45.76	24.4184	0.555432	0.334645	0.0969624	0.18197	39.0245	20.8242	0.330046	0.353327	0.350247	0.454078	33.5466	17.9011	0.0981593	0.337479	0.771158	0.953774
FBgn0010399	Nmdar1	3R	5508842	5523328	-	4170	0	0	0.483344	0.11591	1.0109	3.36365	0.763768	NA	0.25256	0.060566	0.991441	3.3774	0.7691	NA	0.207585	0.0497805	-0.0224062	3.4028	0.994746	NA
FBgn0010401	Os-C	3R	7978959	7979614	+	604	7.2223	11.9575	4.32638	7.16288	-0.597728	0.836905	0.475096	0.605963	4.45942	7.38314	-0.262235	0.865005	0.761768	0.825575	4.91285	8.13385	-0.428722	0.818048	0.600223	0.906414
FBgn0010403	Obp83b	3R	5976177	5976817	-	528	0	0	0	0	NA	NA	NA	NA	0	0	NA	NA	NA	NA	0	0	NA	NA	NA	NA
FBgn0010406	RNaseX25	3L	7970588	7972449	+	1663	781.751	470.085	986.35	593.115	0.329168	0.199957	0.0997242	0.186112	1180.13	709.642	0.594265	0.20123	0.00314537	0.00822391	827.624	497.669	0.0760292	0.199961	0.703783	0.937771
FBgn0010407	Ror	2L	10251843	10254686	+	2271	57.8572	25.4765	18.2994	8.05784	-1.66762	0.310466	7.8157e-08	8.58021e-07	16.1389	7.10651	-1.74384	0.33964	2.83059e-07	1.6043e-06	43.6242	19.2092	-0.412354	0.277614	0.137451	0.683077
FBgn0010408	RpS9	3L	9509793	9511531	-	1018	9540.99	9372.29	2544.35	2499.36	-1.90664	0.535672	0.000371789	0.00173876	4430.41	4352.07	-1.10823	0.535746	0.0385858	0.07261	5909.12	5804.64	-0.690969	0.535542	0.196973	0.724664
FBgn0010409	RpL18A	2R	17546406	17547462	-	635	12947.1	20389.1	5551.95	8743.23	-1.22123	0.223184	4.45363e-08	5.19131e-07	6181.08	9733.98	-1.06856	0.223436	1.73198e-06	8.70345e-06	11636.9	18325.8	-0.153572	0.22305	0.491131	0.865505
FBgn0010411	RpS18	2R	20263979	20264848	+	612	9730.63	15899.7	3738.16	6108.11	-1.37986	0.271675	3.79262e-07	3.73367e-06	4161.71	6800.18	-1.22772	0.271983	6.36296e-06	2.91057e-05	8715.16	14240.5	-0.158598	0.271501	0.559117	0.896719
FBgn0010412	RpS19a	X	16637894	16639249	+	1254	19619.3	15645.4	8236.84	6568.45	-1.25183	0.118937	6.61388e-26	6.96534e-24	7016.03	5594.92	-1.48088	0.119428	2.62158e-35	2.15852e-33	18847.9	15030.2	-0.0575403	0.118758	0.628018	0.916981
FBgn0010414	SerT	2R	24404595	24411074	-	3725	0	0	0	0	0	4.40736	1	NA	0.276259	0.0741635	1.0622	4.3837	0.808543	NA	0	0	0	4.40736	1	NA
FBgn0010415	Sdc	2R	21392402	21481176	-	4202	2685.27	639.046	1806.64	429.948	-0.571175	0.503489	0.256612	0.384205	4298.03	1022.85	0.677025	0.503489	0.178733	0.263731	1927.6	458.733	-0.47766	0.503424	0.342711	0.813782
FBgn0010416	TH1	X	16388820	16391438	-	2297	441.109	192.037	545.047	237.286	0.299989	0.279662	0.283413	0.414815	334.929	145.812	-0.367167	0.284266	0.196484	0.284912	485.134	211.203	0.131753	0.279564	0.637441	0.918204
FBgn0010417	Taf6	3L	19599088	19601382	+	2056	463.923	225.644	420.483	204.515	-0.135984	0.265579	0.608631	0.719349	622.923	302.978	0.407255	0.266987	0.127165	0.198097	347.511	169.023	-0.411014	0.265625	0.121779	0.67026
FBgn0010421	TfIIFbeta	3R	10766622	10767804	-	1118	206.826	184.996	463.742	414.796	1.16862	0.176376	3.45514e-11	6.6159e-10	453.506	405.641	1.1496	0.180197	1.77476e-10	1.59781e-09	314.453	281.264	0.611006	0.177186	0.000563968	0.0661793
FBgn0010422	TfIIS	2L	15058919	15060757	-	1773	1732.98	977.428	1254.37	707.487	-0.464286	0.179669	0.00976281	0.0282408	1131.88	638.399	-0.599348	0.1815	0.000959336	0.00282284	1618.73	912.99	-0.0959032	0.17924	0.592613	0.904392
FBgn0010423	TpnC47D	2R	11273845	11275286	-	791	0	0	2.08194	2.63204	3.09649	1.46583	0.0346474	0.0796451	10.5204	13.3002	5.56103	1.40689	7.72723e-05	0.000286474	0.207585	0.262433	-0.0224006	1.80919	0.990121	0.999184
FBgn0010424	TpnC73F	3L	17046063	17048390	+	1059	5.73249	5.41311	2.28968	2.16212	-1.17158	0.989432	0.236378	0.361024	2.17782	2.05649	-1.7311	1.1208	0.122463	0.191861	2.68631	2.53665	-0.960525	0.956751	0.315405	0.804124
FBgn0010425	epsilonTry	2R	11345237	11346066	-	830	0	0	0	0	NA	NA	NA	NA	0	0	NA	NA	NA	NA	0	0	NA	NA	NA	NA
FBgn0010431	mtrm	3L	8413012	8414103	+	1092	0.365022	0.334269	0.252983	0.231669	-0.744985	2.66647	0.779946	NA	0.552518	0.505969	0.752996	2.57091	0.769605	NA	0.690101	0.63196	0.526237	2.5304	0.835255	NA
FBgn0010433	ato	3R	8278052	8279274	+	1223	0	0	0	0	NA	NA	NA	NA	0	0	NA	NA	NA	NA	0	0	NA	NA	NA	NA
FBgn0010434	cora	2R	19229063	19243751	+	6043	3569.48	590.68	6563.59	1086.15	0.877014	0.192669	5.3159e-06	4.09058e-05	8091.07	1338.92	1.17946	0.19287	9.63643e-10	7.93429e-09	4120.73	681.901	0.205429	0.192744	0.286508	0.783389
FBgn0010435	emp	2R	24976456	24986070	-	3522	12.3015	3.49275	31.3788	8.90936	1.3329	0.378449	0.000428272	0.00196697	46.4043	13.1756	1.95547	0.381801	3.02785e-07	1.70331e-06	13.7587	3.90651	0.129324	0.399721	0.746289	0.947977
FBgn0010438	mtSSB	3R	16204194	16205250	-	575	263.346	457.993	231.547	402.691	-0.185331	0.191289	0.33262	0.466265	179.92	312.905	-0.497126	0.199993	0.0129292	0.0284085	265.653	462.006	0.0162708	0.189611	0.931616	0.988256
FBgn0010441	pll	3R	27251131	27253182	-	1931	140.358	72.6867	267.305	138.428	0.915729	0.175259	1.74163e-07	1.8131e-06	292.284	151.364	1.08479	0.179745	1.58841e-09	1.27087e-08	166.517	86.2337	0.233181	0.177331	0.188528	0.71806
FBgn0010452	trn	3L	13114271	13118077	+	3365	6.03114	1.79231	1.93717	0.575683	-1.61524	0.964513	0.0939987	0.177994	2.13898	0.635654	-1.07961	0.981634	0.271417	0.369714	5.25176	1.5607	-0.14071	0.852827	0.86895	0.975161
FBgn0010453	Wnt4	2L	7255419	7277171	-	3367	18.7522	5.56942	48.1076	14.288	1.41212	0.823022	NA	NA	192.528	57.181	3.38476	0.820198	NA	NA	6.62319	1.96709	-1.44465	0.857949	NA	NA
FBgn0010470	Fkbp14	2R	21487167	21497929	-	1800	1777.08	987.266	820.602	455.89	-1.11447	0.0944727	4.05513e-32	6.22497e-30	773.014	429.452	-1.19351	0.0982354	5.77007e-34	4.21448e-32	2074.74	1152.63	0.225245	0.0920612	0.0144178	0.364747
FBgn0010473	tutl	2L	4283148	4323781	+	9888	520.525	52.6421	639.365	64.6607	0.293622	0.221033	0.184043	0.298296	1013.86	102.534	0.941143	0.221944	2.23074e-05	9.13371e-05	968.78	97.9754	0.893698	0.220159	4.92129e-05	0.0136558
FBgn0010482	l(2)01289	2R	6721101	6740672	-	9515	4.19705	0.441098	2.98566	0.313784	-0.624745	0.803765	0.436998	0.570137	10.7555	1.13037	0.995734	0.755147	0.187304	0.273836	5.7415	0.603416	0.280733	0.740608	0.704645	0.937771
FBgn0010488	NAT1	2R	12915994	12923734	+	5665	7668.61	1353.68	5029.8	887.874	-0.608211	0.257615	0.0182291	0.0473173	6535.42	1153.65	-0.233	0.257792	0.366085	0.4696	4982.34	879.496	-0.621939	0.257583	0.0157559	0.372342
FBgn0010497	dmGlut	2L	12027438	12034122	+	2426	41.051	16.9213	44.0382	18.1526	0.0969974	0.265971	0.715342	0.803628	42.8751	17.6732	0.0214853	0.282491	0.939374	0.957667	41.4295	17.0773	-0.00617417	0.263844	0.981331	0.998751
FBgn0010501	Dcp-1	2R	23551313	23553547	+	1749	992.603	567.526	1700.63	972.343	0.781411	0.138964	1.87541e-08	2.37894e-07	1677.87	959.33	0.753842	0.14048	8.04106e-08	5.00535e-07	1106.07	632.403	0.160886	0.139308	0.248134	0.755767
FBgn0010504	kermit	2R	8146918	8156654	-	2633	35.1367	13.3447	39.8136	15.121	0.136944	0.288001	0.634432	0.740566	38.3621	14.5697	0.136514	0.303667	0.653034	0.737565	42.3553	16.0863	0.222018	0.283101	0.432901	0.846216
FBgn0010516	wal	2R	11688569	11690863	-	1579	677.647	429.162	883.879	559.771	0.382427	0.296596	0.197264	0.314879	803.298	508.738	0.260423	0.298206	0.382501	0.486151	835.065	528.857	0.30061	0.29648	0.310617	0.802618
FBgn0010520	Bka	2L	9895287	9896104	+	758	24.6976	32.5826	47.5687	62.7555	0.951724	0.324665	0.00337435	0.0114314	44.9065	59.2434	1.00171	0.33719	0.00297061	0.0078073	25.2771	33.3471	0.0352443	0.335081	0.916232	0.984661
FBgn0010531	Ccs	2R	10121486	10122574	-	977	61.8959	63.353	83.0154	84.9697	0.438357	0.222038	0.0483538	0.104346	107.356	109.884	0.7771	0.228133	0.000658392	0.00201047	86.3011	88.3327	0.496329	0.219203	0.023559	0.442478
FBgn0010548	Aldh-III	2R	7466879	7477162	-	3593	215.057	59.8544	166.781	46.4182	-0.369879	0.153527	0.0159873	0.0425076	206.942	57.5959	-0.072286	0.158575	0.648499	0.733449	232.204	64.6267	0.104979	0.149255	0.481836	0.86314
FBgn0010549	l(2)03659	2R	9390165	9395281	+	4499	1.3868	0.308247	0	0	-3.3771	2.0218	0.0948512	0.179047	1.37275	0.305122	-1.5008	1.95839	0.443471	0.547657	1.96591	0.436966	0.38294	1.71355	0.823164	NA
FBgn0010551	Phb2	2R	18819467	18822250	+	1889	1136.58	601.685	546.195	289.145	-1.06037	0.194756	5.19233e-08	5.91534e-07	384.129	203.351	-1.52937	0.199834	1.95997e-14	2.78673e-13	1162.54	615.428	0.0297561	0.193175	0.877581	0.976628
FBgn0010583	dock	2L	825969	833241	+	3735	459.65	123.066	613.877	164.358	0.406461	0.192302	0.0345438	0.0794693	808.571	216.485	0.794415	0.193974	4.21305e-05	0.00016373	489.316	131.008	0.0786179	0.192434	0.682874	0.930984
FBgn0010590	Prosbeta1	2R	16013805	16014787	-	852	1281.66	1504.3	1277.83	1499.8	-0.00121906	0.228348	0.99574	0.997723	1562.63	1834.08	0.29437	0.229199	0.199021	0.287899	1521.49	1785.79	0.250705	0.228069	0.271658	0.77438
FBgn0010591	Sply	2R	17088441	17091958	-	2163	228.049	105.432	230.957	106.776	0.0104635	0.163659	0.949022	0.969357	237.122	109.627	0.113286	0.169336	0.503494	0.602875	206.47	95.4554	-0.149538	0.163238	0.359628	0.817665
FBgn0010602	lwr	2L	540599	542580	-	1864	899.491	482.56	1177.78	631.855	0.387284	0.346359	0.2635	0.392004	1100.92	590.624	0.299398	0.347374	0.388749	0.492916	1101.15	590.747	0.290244	0.346291	0.401947	0.833268
FBgn0010607	l(2)05714	2L	4970135	4973921	-	1285	704.018	547.874	444.727	346.091	-0.657071	0.220798	0.0029214	0.010126	284.913	221.723	-1.2957	0.227266	1.18936e-08	8.38289e-08	667.381	519.363	-0.069807	0.219553	0.750523	0.948714
FBgn0010611	Hmgs	2R	16336090	16341242	+	2795	1223.86	437.876	1661.93	594.608	0.444196	0.205482	0.0306387	0.0720579	2172.5	777.281	0.823047	0.206126	6.52598e-05	0.000245109	855.384	306.041	-0.514038	0.205996	0.0125823	0.349181
FBgn0010612	ATPsynG	2L	10975522	10976399	-	789	327.32	414.854	216.017	273.785	-0.587684	0.329209	0.0742389	0.147614	184.941	234.399	-0.783966	0.335084	0.019304	0.0400541	286.319	362.888	-0.180166	0.327782	0.582559	0.903723
FBgn0010620	CG10939	2R	17394593	17405171	+	1717	4.92018	2.86557	169.067	98.4663	4.9694	0.478918	3.17834e-25	3.16332e-23	322.525	187.842	5.92361	0.479396	4.49753e-35	3.60479e-33	5.56927	3.24361	0.0512562	0.556301	0.926589	0.986687
FBgn0010621	CCT5	2R	12174802	12177516	+	1981	1063.53	536.865	850.009	429.081	-0.318206	0.208969	0.127822	0.225582	922.011	465.427	-0.207933	0.210698	0.323703	0.426068	757.978	382.624	-0.483031	0.208881	0.0207516	0.421002
FBgn0010622	DCTN3-p24	2R	23061420	23062593	-	1174	157.542	134.193	219.413	186.894	0.484499	0.202952	0.0169746	0.0445492	259.516	221.053	0.723536	0.207465	0.000487546	0.0015343	167.051	142.292	0.0945474	0.203601	0.642379	0.919258
FBgn0010638	Sec61beta	2R	14618771	14619681	+	792	877.215	1107.59	663.751	838.07	-0.402623	0.213348	0.059138	0.122932	591.354	746.66	-0.54119	0.216199	0.0123075	0.0272275	799.435	1009.39	-0.133858	0.212758	0.529246	0.884564
FBgn0010651	MFS14	2R	18796975	18803727	-	3288	1574.05	478.727	180.458	54.8839	-3.1246	0.383966	4.02876e-16	1.48933e-14	246.915	75.0957	-2.72278	0.386827	1.93981e-12	2.20714e-11	1524.23	463.575	-0.0457203	0.380347	0.904319	0.982021
FBgn0010660	Nup214	2R	22918937	22924742	-	5334	2104.62	394.567	2443.22	458.046	0.212886	0.158525	0.179299	0.292474	2083.27	390.565	-0.0109431	0.159729	0.94538	0.96213	1703.6	319.384	-0.307604	0.158673	0.0525495	0.56061
FBgn0010741	Pfdn2	3L	11073292	11074388	-	993	1450.69	1460.92	942.231	948.873	-0.619578	0.320352	0.0531064	0.11238	699.683	704.616	-1.04829	0.322299	0.00114378	0.0033107	930.434	936.993	-0.63743	0.320216	0.0465222	0.541976
FBgn0010747	Srp54k	3L	5152678	5154777	+	2015	418.227	207.557	398.05	197.544	-0.0600759	0.188632	0.750119	0.829735	354.15	175.757	-0.195595	0.193434	0.311934	0.413806	338.489	167.984	-0.293439	0.188595	0.119727	0.669389
FBgn0010750	atms	3R	4750035	4777490	+	2040	369.456	181.106	370.759	181.745	0.0173051	0.26362	0.947661	0.968797	368.172	180.476	-0.000319843	0.26716	0.999045	0.999486	276.955	135.762	-0.402511	0.263978	0.127312	0.670486
FBgn0010762	simj	3L	10664739	10690734	+	5134	1508.1	293.747	1401.02	272.891	-0.106356	0.326663	0.74474	0.826453	1696.02	330.351	0.160652	0.327243	0.623478	0.711369	1219.69	237.571	-0.306283	0.326643	0.348415	0.814457
FBgn0010768	sqz	3R	19164211	19170576	+	3258	290.061	89.0305	199.884	61.3519	-0.54842	0.363415	0.13128	0.230471	173.549	53.2685	-0.768859	0.369394	0.0373967	0.0706808	300.555	92.2512	0.0393135	0.361734	0.913456	0.9845
FBgn0010770	ppan	3R	21116254	21117899	+	1477	582.073	394.091	373.592	252.94	-0.635073	0.246677	0.0100381	0.028917	212.026	143.552	-1.41118	0.254501	2.94144e-08	1.94884e-07	478.342	323.86	-0.276701	0.245642	0.259979	0.766782
FBgn0010772	Xe7	3R	5665139	5669334	-	3325	1753.9	527.488	1616.48	486.16	-0.119862	0.145686	0.410656	0.544874	1459.28	438.882	-0.255744	0.147415	0.0827656	0.138945	2011.99	605.111	0.19581	0.145305	0.177794	0.709751
FBgn0010774	Ref1	3R	7077904	7080387	-	1328	2235.06	1683.03	1593.2	1199.7	-0.489472	0.273433	0.0734378	0.146342	953.896	718.295	-1.21644	0.275237	9.8886e-06	4.34973e-05	2585.73	1947.09	0.209292	0.273126	0.443508	0.850435
FBgn0010786	l(3)02640	3L	1334889	1339415	+	2556	202.977	79.412	174.017	68.0819	-0.23746	0.173774	0.171787	0.283764	99.3786	38.8805	-1.07028	0.191656	2.34563e-08	1.57834e-07	181.931	71.1779	-0.170672	0.171989	0.321031	0.805768
FBgn0010803	TrpRS	3R	9265027	9266904	-	1683	629.432	373.994	381.758	226.832	-0.715988	0.19106	0.000178646	0.00091723	296.532	176.193	-1.09631	0.197429	2.80947e-08	1.86686e-07	555.325	329.961	-0.173637	0.189451	0.359389	0.817665
FBgn0010808	Chchd3	3R	31052616	31053915	-	940	221.754	235.908	173.57	184.649	-0.337181	0.239635	0.159409	0.268336	144.133	153.333	-0.541704	0.248299	0.0291349	0.0569924	196.776	209.336	-0.15492	0.237917	0.514948	0.879414
FBgn0010812	unc-45	3R	8033301	8037403	+	3987	414.656	104.002	655.84	164.495	0.670773	0.167057	5.93887e-05	0.000346128	644.395	161.624	0.621065	0.17017	0.000262573	0.000873349	291.986	73.2345	-0.496043	0.169293	0.00338873	0.191144
FBgn0010825	Gug	3L	8449922	8472669	+	8819	2569.12	291.317	3076.17	348.812	0.259994	0.394871	0.510262	0.636738	7922.15	898.305	1.62314	0.394853	3.94409e-05	0.000154039	2097.99	237.894	-0.292184	0.394924	0.459391	0.853554
FBgn0010830	l(3)04053	3L	22738602	22741388	-	2469	217.742	88.1905	173.066	70.0955	-0.330465	0.186339	0.0761532	0.150594	102.077	41.3435	-0.965346	0.201033	1.57146e-06	7.95568e-06	200.003	81.0057	-0.123244	0.184021	0.503033	0.874922
FBgn0010877	l(3)05822	3R	18288866	18298879	-	3531	1083.11	306.742	2167.1	613.735	0.997856	0.269485	0.000213213	0.00107044	3651.52	1034.13	1.74685	0.269678	9.32267e-11	8.71367e-10	1204.12	341.013	0.149977	0.269729	0.57819	0.90297
FBgn0010894	sinu	3L	5559470	5561598	-	2065	677.539	328.106	847.575	410.448	0.319027	0.17913	0.0749156	0.148601	1236.45	598.765	0.84954	0.180178	2.417e-06	1.18265e-05	808.698	391.621	0.25103	0.178915	0.160597	0.69823
FBgn0010905	Spn	3L	2505245	2554292	-	10266	586.974	57.1765	1520.66	148.126	1.37048	0.29992	4.88961e-06	3.80784e-05	2589.26	252.217	2.13263	0.300158	1.20298e-12	1.39864e-11	589.417	57.4144	0.00297375	0.300631	0.992108	0.9994
FBgn0010909	msn	3L	2554847	2586540	-	6833	3402.49	497.949	8450.46	1236.71	1.31225	0.156858	5.96753e-17	2.49069e-15	11878.3	1738.37	1.80177	0.157001	1.73834e-30	1.01575e-28	3402.17	497.902	-0.000424663	0.157086	0.997843	1
FBgn0010926	l(3)07882	3R	17535533	17539963	-	4315	418.466	96.9793	280.699	65.0519	-0.561797	0.219385	0.0104438	0.0299051	172.544	39.987	-1.25509	0.229347	4.4388e-08	2.87159e-07	275.306	63.8022	-0.589992	0.21875	0.00699457	0.266227
FBgn0011016	SsRbeta	3L	16129617	16130983	+	950	235.74	248.147	110.468	116.282	-1.08586	0.182425	2.643e-09	3.89864e-08	147.986	155.775	-0.745964	0.188376	7.49559e-05	0.000278685	206.84	217.726	-0.177121	0.174722	0.310709	0.802618
FBgn0011020	Sas-4	3R	7151367	7154219	+	2802	327.451	116.863	418.608	149.396	0.362886	0.171255	0.0340924	0.078729	372.293	132.867	0.154122	0.176508	0.382569	0.486169	274.959	98.1295	-0.243791	0.172343	0.157196	0.694727
FBgn0011202	dia	2L	20758144	20768053	+	6718	750.996	111.789	1511.54	224.998	1.00154	0.17519	1.08497e-08	1.45795e-07	2315.57	344.682	1.61247	0.175732	4.48609e-20	1.1642e-18	975.666	145.232	0.369646	0.175508	0.0351908	0.495436
FBgn0011204	cue	3L	1503226	1517271	-	2801	386.62	138.029	463.353	165.424	0.261684	0.197486	0.185145	0.299653	584.703	208.748	0.565029	0.199857	0.00469621	0.0117205	390.728	139.496	0.0159061	0.197481	0.935804	0.988714
FBgn0011205	fbl	3L	20384429	20391913	+	3513	222.251	63.2652	234.678	66.8027	0.0622398	0.204854	0.761261	0.837772	247.83	70.5465	0.175646	0.209984	0.402889	0.507077	291.135	82.8736	0.371875	0.203006	0.0669748	0.5936
FBgn0011206	bol	3L	9097629	9134405	-	8169	388.116	47.5108	155.16	18.9937	-1.31828	0.539494	0.0145434	0.0393388	327.277	40.0633	-0.267896	0.539917	0.619767	0.708372	215.696	26.4042	-0.84345	0.538187	0.117066	0.668083
FBgn0011207	pelo	2L	9700810	9708883	+	2045	695.139	339.921	524.489	256.474	-0.411048	0.158873	0.00967396	0.0280285	341.058	166.776	-0.989668	0.165492	2.22921e-09	1.74654e-08	882.491	431.536	0.33894	0.157207	0.0310831	0.476607
FBgn0011211	blw	2R	22799099	22802180	+	2252	12108.8	5376.9	5404	2399.64	-1.16352	0.124173	7.2421e-21	4.71883e-19	5031.28	2234.14	-1.26831	0.124792	2.89025e-24	1.03877e-22	10620.2	4715.9	-0.188684	0.123937	0.127904	0.670486
FBgn0011217	eff	3R	14732414	14741319	-	2375	22839.3	9616.54	17582.6	7403.21	-0.377256	0.503582	0.45377	0.586611	30773.4	12957.2	0.430036	0.503593	0.393141	0.497301	12590.3	5301.19	-0.859088	0.503588	0.08802	0.637563
FBgn0011224	heph	3R	31846987	32015520	-	12120	964.998	79.6203	1612.87	133.075	0.740343	0.152576	1.22037e-06	1.08575e-05	2223.68	183.472	1.19343	0.153339	7.08386e-15	1.08376e-13	965.262	79.6421	-0.000148629	0.153032	0.999225	1
FBgn0011225	jar	3R	24252826	24271233	-	5641	179.551	31.8296	729.085	129.248	2.00037	0.310972	1.25409e-10	2.20549e-09	832.359	147.555	2.19901	0.312225	1.88108e-12	2.14571e-11	242.24	42.9427	0.410777	0.31284	0.189163	0.71806
FBgn0011227	ox	2R	12757133	12757529	-	331	115.013	347.472	39.531	119.429	-1.53067	1.02942	NA	NA	64.9215	196.137	-0.824772	1.03229	NA	NA	34.1956	103.31	-1.74031	1.02923	NA	NA
FBgn0011230	poe	2L	8054322	8071624	-	16216	4497.79	277.368	5279.75	325.589	0.230574	0.345822	0.504938	0.631922	4470.02	275.655	-0.00913428	0.346095	0.978944	0.985692	3390.58	209.088	-0.408451	0.345869	0.237625	0.749578
FBgn0011232	scat	2L	9431405	9435341	+	3558	287.685	80.8557	283.068	79.5583	-0.01748	0.141594	0.90175	0.9394	365.442	102.71	0.32489	0.145179	0.0252309	0.0504674	232.695	65.4006	-0.303573	0.141792	0.0322763	0.479517
FBgn0011236	ken	2R	23870273	23877442	+	3070	1661.02	541.048	3017.56	982.919	0.859997	0.321445	0.00746377	0.0225256	4797.6	1562.73	1.52625	0.321586	2.07473e-06	1.02907e-05	1837.48	598.526	0.144277	0.321554	0.653658	0.922167
FBgn0011239	ms(2)35Ci	2L	15292468	15294136	+	1489	0	0	0	0	NA	NA	NA	NA	0	0	NA	NA	NA	NA	0	0	NA	NA	NA	NA
FBgn0011244	Hsp60B	2L	728362	730564	+	2203	0	0	0	0	NA	NA	NA	NA	0	0	NA	NA	NA	NA	0	0	NA	NA	NA	NA
FBgn0011259	Sema1a	2L	8542147	8672041	+	10190	198.994	19.5283	198.432	19.4733	-0.0169321	0.270841	0.950151	0.970073	283.363	27.8079	0.450116	0.273833	0.100226	0.162591	219.56	21.5466	0.127732	0.269612	0.635669	0.918204
FBgn0011260	Sema2a	2R	16500178	16533459	+	4171	1261.99	302.563	1340.92	321.487	0.0832793	0.17056	0.625359	0.733283	1263.16	302.843	-0.00438745	0.172265	0.979681	0.986104	1383.17	331.615	0.127567	0.170337	0.453911	0.853079
FBgn0011270	Pglym87	3R	12231645	12232729	-	1085	0	0	0	0	NA	NA	NA	NA	0	0	NA	NA	NA	NA	0	0	NA	NA	NA	NA
FBgn0011272	RpL13	2L	9967313	9968645	+	1203	15073.8	12530.1	4947.93	4112.99	-1.60691	0.346958	3.63152e-06	2.91843e-05	6027.28	5010.2	-1.32367	0.347112	0.000137083	0.000481971	11236.1	9340.07	-0.423651	0.346857	0.221934	0.733186
FBgn0011273	Acam	3R	25811911	25813134	+	1224	0	0	0	0	NA	NA	NA	NA	0	0	NA	NA	NA	NA	0	0	NA	NA	NA	NA
FBgn0011274	Dif	2L	17413248	17433161	-	5695	1003.7	176.243	1392.67	244.542	0.469352	0.38817	0.226609	0.350026	1648.79	289.516	0.71245	0.388681	0.0668032	0.115952	1214.59	213.272	0.271872	0.388152	0.483661	0.86314
FBgn0011276	HLH3B	X	2680199	2681723	-	1428	0.328379	0.229957	0.315954	0.221256	-0.744979	3.09276	0.809649	NA	0	0	-0.913779	3.09276	0.767645	NA	0.862326	0.60387	0.865528	2.95223	0.769386	NA
FBgn0011277	HLH4C	X	4645127	4647414	-	1424	0	0	0	0	NA	NA	NA	NA	0	0	NA	NA	NA	NA	0	0	NA	NA	NA	NA
FBgn0011278	lbe	3R	21441577	21446537	-	2277	0	0	0	0	NA	NA	NA	NA	0	0	NA	NA	NA	NA	0	0	NA	NA	NA	NA
FBgn0011279	Obp69a	3L	12396171	12396957	+	546	0	0	0	0	NA	NA	NA	NA	0	0	NA	NA	NA	NA	0	0	NA	NA	NA	NA
FBgn0011280	Obp19d	X	20419613	20420979	+	1101	1.02178	0.928048	0.884891	0.803716	-0.442361	1.81998	0.80796	0.87105	1.2865	1.16848	0.492418	1.79596	0.783945	0.843119	0.482516	0.438253	-1.30401	1.91397	0.495676	NA
FBgn0011281	Obp83a	3R	5972155	5975245	-	986	0	0	0	0	NA	NA	NA	NA	0	0	NA	NA	NA	NA	0	0	NA	NA	NA	NA
FBgn0011282	Obp84a	3R	7250725	7251957	-	817	0	0	0	0	NA	NA	NA	NA	0	0	NA	NA	NA	NA	0	0	NA	NA	NA	NA
FBgn0011283	Obp28a	2L	7496791	7497365	-	575	0	0	0	0	NA	NA	NA	NA	0	0	NA	NA	NA	NA	0	0	NA	NA	NA	NA
FBgn0011284	RpS4	3L	13041756	13044234	+	1449	10467.8	7224.13	4449.95	3071.05	-1.23384	0.266604	3.69216e-06	2.95929e-05	4767.03	3289.88	-1.13728	0.266887	2.03262e-05	8.41382e-05	8545.55	5897.55	-0.292409	0.266473	0.272496	0.775135
FBgn0011286	RyR	2R	8860364	8888097	+	16405	7.33568	0.447161	5.39748	0.329015	-0.542635	0.723877	0.453481	0.586402	7.11866	0.433933	-0.0423927	0.73974	0.9543	0.968677	9.83075	0.599253	0.283732	0.687082	0.679642	0.930491
FBgn0011288	Snap25	3L	24074180	24299205	+	2282	148.349	65.0084	120.969	53.01	-0.293982	0.164346	0.0736472	0.146631	86.0031	37.6876	-0.786145	0.181262	1.44401e-05	6.16904e-05	234.989	102.975	0.666386	0.156311	2.01525e-05	0.00722299
FBgn0011289	TfIIA-L	3R	27251112	27256463	+	1645	488.565	297	418.992	254.706	-0.217307	0.23481	0.354727	0.488985	245.391	149.174	-0.932932	0.241768	0.000113949	0.000407919	476.532	289.685	-0.0312646	0.234076	0.893746	0.980744
FBgn0011290	Taf12	3R	11678386	11679690	-	1234	295.333	239.33	532.65	431.645	0.859243	0.193807	9.27194e-06	6.70735e-05	546.188	442.616	0.896439	0.196829	5.25314e-06	2.43115e-05	305.937	247.923	0.0586375	0.195055	0.763704	0.952743
FBgn0011291	Taf11	2L	9762424	9763262	-	777	131.902	169.759	281.803	362.68	1.09621	0.192971	1.3416e-08	1.7559e-07	295.602	380.441	1.19023	0.197589	1.70415e-09	1.35987e-08	157.795	203.082	0.263882	0.195506	0.177099	0.708559
FBgn0011293	a10	3L	17023123	17023741	-	567	0	0	0	0	NA	NA	NA	NA	0	0	NA	NA	NA	NA	0	0	NA	NA	NA	NA
FBgn0011294	a5	2L	1329161	1329993	+	776	0	0	0	0	NA	NA	NA	NA	0	0	NA	NA	NA	NA	0	0	NA	NA	NA	NA
FBgn0011296	l(2)efl	2R	23684651	23685543	-	741	0	0	0	0	NA	NA	NA	NA	0	0	NA	NA	NA	NA	0	0	NA	NA	NA	NA
FBgn0011297	Alg3	2R	23705439	23709792	-	1704	164.372	96.4625	31.2899	18.3626	-2.37342	0.3588	3.71841e-11	7.10498e-10	39.37	23.1044	-2.10786	0.372087	1.47067e-08	1.0246e-07	128.616	75.4789	-0.329151	0.338615	0.331025	0.807108
FBgn0011300	babo	2R	8952339	8962796	+	5113	964.022	188.543	816.053	159.604	-0.2433	0.271251	0.369743	0.505245	1437.05	281.057	0.564122	0.271672	0.0378497	0.0714325	1186.77	232.109	0.296578	0.270723	0.273296	0.776076
FBgn0011305	Rsf1	2L	10261795	10263554	-	1760	960.631	545.813	909.059	516.511	-0.0739413	0.247998	0.765587	0.841393	1129.99	642.042	0.236723	0.249067	0.341889	0.445473	696.153	395.542	-0.458824	0.24812	0.0644283	0.583382
FBgn0011327	Uch-L5	3L	9475493	9476965	-	1394	964.258	691.72	669.727	480.435	-0.520007	0.213867	0.0150384	0.0403924	575.24	412.654	-0.72997	0.216915	0.000764793	0.0023043	864.24	619.971	-0.151727	0.213193	0.476657	0.861432
FBgn0011335	vers	3L	12116101	12118055	+	1513	238.233	157.457	261.443	172.798	0.141295	0.138093	0.306216	0.438413	243.742	161.098	0.044817	0.145054	0.757347	0.822161	289.116	191.088	0.290746	0.136251	0.0328509	0.486307
FBgn0011336	Stt3B	3R	25066712	25069637	-	2703	793.89	293.707	162.375	60.0722	-2.28768	0.189548	1.5372e-33	2.72989e-31	189.523	70.1158	-2.15702	0.196413	4.66299e-28	2.28285e-26	664.094	245.688	-0.25591	0.182284	0.160346	0.69823
FBgn0011361	ND-ACP	3L	1329949	1331631	+	842	587.908	698.228	485.14	576.176	-0.275294	0.229187	0.229683	0.353557	414.156	491.871	-0.467963	0.232963	0.0445645	0.0822137	644.169	765.046	0.13373	0.228274	0.557988	0.896719
FBgn0011455	ND-SGDH	3L	12137496	12138584	-	888	410.61	462.399	204.519	230.314	-0.991207	0.251543	8.13072e-05	0.000454568	201.755	227.201	-1.02906	0.257748	6.53833e-05	0.000245411	313.845	353.429	-0.37386	0.249106	0.133405	0.676224
FBgn0011474	PR-Set7	3R	14316038	14320494	+	4183	796.786	190.482	913.233	218.32	0.193247	0.137573	0.160115	0.268847	852.025	203.688	0.0733336	0.140491	0.601683	0.692696	692.202	165.48	-0.207618	0.137819	0.131951	0.674772
FBgn0011476	l(3)neo43	3R	15277981	15278668	-	627	27.0468	43.1368	27.442	43.7671	0.0915654	0.487915	0.851138	0.903317	38.7203	61.7548	0.437308	0.499307	0.381123	0.484603	25.7167	41.0154	0.00253061	0.485782	0.995844	1
FBgn0011481	Ssdp	3R	18192494	18199595	-	5521	5043.9	913.585	3796.04	687.565	-0.409557	0.393282	0.297698	0.429969	5314.08	962.521	0.0737757	0.393412	0.851247	0.895961	3176.82	575.406	-0.666483	0.393283	0.0901387	0.638734
FBgn0011509	SrpRbeta	3L	8718949	8720225	-	1135	213.085	187.74	143.58	126.503	-0.541445	0.188124	0.00400039	0.0132668	136.511	120.274	-0.607202	0.197401	0.00209813	0.00571341	180.002	158.592	-0.217729	0.184773	0.238653	0.7506
FBgn0011554	etaTry	2R	11340513	11341423	-	911	0.723128	0.793774	0.862269	0.946509	0.834984	2.96086	0.777938	NA	0	0	-0.913777	3.08264	0.766904	NA	0.207585	0.227864	-0.984175	3.08264	0.749526	NA
FBgn0011555	thetaTry	2R	11341714	11342760	-	1047	0	0	0	0	NA	NA	NA	NA	0	0	NA	NA	NA	NA	0	0	NA	NA	NA	NA
FBgn0011556	zetaTry	2R	11339186	11340132	-	947	0	0	0	0	NA	NA	NA	NA	0	0	NA	NA	NA	NA	0	0	NA	NA	NA	NA
FBgn0011559	Acp36DE	2L	18356047	18359028	-	2921	2.43831	0.834752	2.56039	0.876546	0.0564843	1.06443	0.95768	0.975519	6.23352	2.13403	0.969167	1.05848	0.359866	0.463541	1.77601	0.608013	-0.479027	1.08689	0.659408	0.923666
FBgn0011566	Smyd3	X	2606680	2608876	-	1762	104.406	59.2545	186.902	106.074	0.855412	0.232493	0.000233873	0.00115938	159.535	90.5418	0.669537	0.240473	0.00536509	0.0131971	121.976	69.226	0.243185	0.234324	0.299357	0.795748
FBgn0011569	can	3L	10263909	10267111	-	2953	0	0	0	0	NA	NA	NA	NA	0	0	NA	NA	NA	NA	0	0	NA	NA	NA	NA
FBgn0011570	cpb	2L	1704902	1706962	+	1926	3054.36	1585.86	2868.58	1489.4	-0.0889932	0.170921	0.602597	0.714642	2524.67	1310.83	-0.267436	0.17184	0.119634	0.188275	2718.92	1411.69	-0.166149	0.170857	0.33083	0.807108
FBgn0011573	Cdc37	3L	1795392	1797307	+	1611	2799.8	1737.93	3624.41	2249.79	0.373598	0.334184	0.263592	0.392076	5313.61	3298.33	0.923798	0.334326	0.00572434	0.013967	2927.21	1817.01	0.0654345	0.334193	0.844768	0.96928
FBgn0011576	Cyp4d2	X	2176006	2178728	+	2467	54.9273	22.2648	54.117	21.9364	-0.0606948	0.516142	0.90639	0.94263	66.5714	26.9848	0.300099	0.522997	0.566099	0.661143	88.3254	35.8027	0.648624	0.511307	0.204598	0.727962
FBgn0011581	Ms	3R	24341551	24343825	+	1178	0	0	0	0	NA	NA	NA	NA	0	0	NA	NA	NA	NA	0	0	NA	NA	NA	NA
FBgn0011582	Dop1R1	3R	14165379	14214810	-	14565	0	0	0.230361	0.0158161	0.216777	4.37986	0.960525	NA	0	0	0	4.37986	1	NA	0.638748	0.043855	1.3928	4.30382	0.746227	NA
FBgn0011584	Trp1	2L	10009381	10013170	+	2459	1628.35	662.201	1091.75	443.981	-0.575664	0.192152	0.00273647	0.00957658	1856.6	755.024	0.180083	0.192645	0.349895	0.453752	1802.76	733.129	0.148108	0.191503	0.439286	0.849236
FBgn0011586	e(r)	X	8904144	8906248	-	1687	4747.55	2814.2	4015.79	2380.43	-0.240687	0.383511	0.530273	0.654782	3331.36	1974.72	-0.511335	0.383846	0.182815	0.26853	3492.19	2070.06	-0.442187	0.383505	0.248904	0.756831
FBgn0011589	Elk	2R	17873939	17926695	+	5351	1.44626	0.270278	1.05228	0.196651	-0.117793	1.86968	0.949765	0.969854	1.56276	0.29205	0.718433	1.87153	0.701071	0.777535	0	0	-3.20793	2.0878	0.124412	NA
FBgn0011591	fng	3L	20925891	20949512	-	1959	12.5704	6.41674	85.6808	43.737	2.66059	0.335498	2.18677e-15	7.4738e-14	127.864	65.2701	3.17947	0.33875	6.2396e-21	1.72293e-19	19.1899	9.79578	0.498408	0.361087	0.167495	0.702081
FBgn0011592	fra	2R	12529053	12564184	+	6320	388.802	61.5194	488.056	77.224	0.319606	0.32016	0.318149	0.451712	596.272	94.3468	0.614904	0.321724	0.0559689	0.0998052	537.134	84.9896	0.457037	0.319743	0.152893	0.69272
FBgn0011596	fzo	3R	23201644	23204034	-	2391	17.8805	7.47824	3.15575	1.31984	-2.5261	1.13076	0.0254841	0.0621794	17.5543	7.34182	-0.232746	1.08578	0.830268	0.878885	4.77261	1.99607	-1.89798	1.09423	0.0828245	0.627812
FBgn0011603	ine	2L	4468000	4477022	-	3965	4.18322	1.05504	0.252983	0.063804	-3.87998	1.46415	0.00804933	0.0240524	0.276259	0.0696744	-3.0944	1.39909	0.0269859	0.0533814	3.11916	0.786674	-0.420376	0.95151	0.658635	0.923183
FBgn0011604	Iswi	2R	12636671	12640628	+	3647	2588.18	709.675	2461.95	675.061	-0.0703763	0.193947	0.716707	0.804962	1707.94	468.313	-0.606311	0.195311	0.00190709	0.0052532	2047.38	561.388	-0.336345	0.193954	0.082892	0.627812
FBgn0011606	Klp3A	X	2599158	2604052	-	4527	721.059	159.28	684.967	151.307	-0.0733861	0.127152	0.563836	0.684355	569.075	125.707	-0.344374	0.131684	0.00891869	0.020601	604.83	133.605	-0.252044	0.127004	0.0471971	0.544222
FBgn0011638	La	2L	20348393	20350012	-	1549	3326.97	2147.82	2136.79	1379.47	-0.639159	0.311088	0.0399182	0.0892029	1211.87	782.355	-1.44743	0.31238	3.5945e-06	1.71344e-05	3381.49	2183.01	0.0230948	0.310892	0.940783	0.988714
FBgn0011640	lark	3L	7339266	7341893	+	2192	1234.58	563.221	779.063	355.412	-0.658795	0.18437	0.000352612	0.00166074	724.951	330.726	-0.769438	0.187058	3.89941e-05	0.000152557	1085.92	495.401	-0.179622	0.183604	0.327921	0.807108
FBgn0011642	Zyx	4	1057365	1065001	-	2377	518.592	218.171	461.454	194.133	-0.179877	0.187162	0.336514	0.470124	472.91	198.953	-0.139722	0.190663	0.463666	0.566266	639.913	269.21	0.291934	0.185899	0.116324	0.668083
FBgn0011648	Mad	2L	3146056	3159643	-	3412	463.719	135.908	843.136	247.109	0.855083	0.163746	1.76981e-07	1.83821e-06	975.642	285.944	1.0496	0.16563	2.34234e-10	2.07782e-09	556.187	163.009	0.254511	0.164299	0.121365	0.67024
FBgn0011653	mas	3L	4161666	4167464	-	3657	0.365022	0.0998146	0	0	-1.70675	4.36036	0.695484	NA	0.25256	0.0690622	0.0307441	4.34062	0.994349	NA	0.241258	0.0659716	-0.984155	4.36036	0.821431	NA
FBgn0011655	Med	3R	31611046	31615375	+	3425	448.898	131.065	746.036	217.821	0.728828	0.215716	0.000728432	0.00312994	987.112	288.208	1.1146	0.217007	2.80309e-07	1.5897e-06	445.659	130.12	-0.0144482	0.216419	0.946773	0.989907
FBgn0011656	Mef2	2R	9913496	9958858	-	9188	1246.18	135.631	1457.92	158.676	0.223929	0.254067	0.378113	0.513748	2172.86	236.489	0.79306	0.254503	0.00183251	0.00506316	1339.86	145.827	0.102151	0.254003	0.687563	0.931258
FBgn0011659	Mlh1	2R	8170274	8172401	+	2075	77.9174	37.5506	43.8112	21.1138	-0.804866	0.279786	0.00401833	0.0133068	22.4128	10.8013	-1.75041	0.323033	6.00422e-08	3.81081e-07	65.5433	31.5872	-0.224385	0.269852	0.405684	0.834488
FBgn0011660	Pms2	2R	15368074	15371520	-	3040	240.818	79.2166	115.682	38.0533	-1.07128	0.263632	4.8332e-05	0.000289896	83.0952	27.334	-1.48075	0.277475	9.47593e-08	5.84629e-07	280.888	92.3975	0.207294	0.257653	0.421081	0.841184
FBgn0011661	Moe	X	8873012	8898332	-	4558	17102.9	3752.29	12140.3	2663.52	-0.494248	0.297448	0.0965871	0.181417	14139.5	3102.13	-0.27508	0.297528	0.355199	0.45938	14050.9	3082.68	-0.283377	0.297427	0.340711	0.813441
FBgn0011666	msi	3R	25516118	25608423	+	11500	1190.01	103.479	2102.91	182.862	0.822099	0.27141	0.00245373	0.00874593	4062.34	353.247	1.7679	0.271521	7.45929e-11	7.05944e-10	1098.2	95.4957	-0.115211	0.271707	0.671547	0.926856
FBgn0011668	Mst57Da	3R	25831575	25831899	-	325	0	0	0	0	NA	NA	NA	NA	0	0	NA	NA	NA	NA	0	0	NA	NA	NA	NA
FBgn0011669	Mst57Db	3R	25830720	25830914	-	195	0	0	0	0	NA	NA	NA	NA	0	0	NA	NA	NA	NA	0	0	NA	NA	NA	NA
FBgn0011670	Mst57Dc	3R	25829321	25829698	-	378	0	0	0	0	NA	NA	NA	NA	0	0	NA	NA	NA	NA	0	0	NA	NA	NA	NA
FBgn0011672	Mvl	3R	21051383	21060800	-	5647	371.145	65.7243	437.541	77.482	0.226825	0.260023	0.38303	0.518305	457.557	81.0266	0.30486	0.262772	0.245981	0.341799	504.564	89.3508	0.431907	0.259366	0.0958643	0.641119
FBgn0011674	insc	2R	20821262	20836028	-	3887	19.3717	4.98371	44.4285	11.43	1.03767	0.350727	0.00309013	0.0106012	104.447	26.8709	2.28875	0.348	4.8046e-11	4.62928e-10	21.656	5.5714	0.000507474	0.363459	0.998886	1
FBgn0011676	Nos	2L	10804274	10837511	-	5224	55.9318	10.7067	192.77	36.9008	1.74973	0.560039	0.0017823	0.0066814	190.935	36.5495	1.75151	0.563384	0.00187778	0.00518033	80.4582	15.4016	0.488716	0.562643	0.385061	0.825217
FBgn0011692	pav	3L	4242734	4246233	+	3207	1556.59	485.371	1525.6	475.709	-0.0300414	0.132825	0.821067	0.882241	1207.16	376.413	-0.355071	0.135217	0.008641	0.020039	1566.2	488.369	0.00867307	0.132578	0.947841	0.990231
FBgn0011693	Pdh	3L	16353233	16354297	-	945	0	0	0	0	NA	NA	NA	NA	0	0	NA	NA	NA	NA	0	0	NA	NA	NA	NA
FBgn0011694	EbpII	2R	25173568	25174230	-	608	0	0	0	0	NA	NA	NA	NA	0	0	NA	NA	NA	NA	0	0	NA	NA	NA	NA
FBgn0011695	EbpIII	2R	24026172	24027518	+	1160	1.02178	0.880845	0.546315	0.470961	-1.04354	2.36288	0.658752	NA	0.276259	0.238154	-1.14223	2.39684	0.633679	NA	0	0	-3.16476	2.43823	0.194296	NA
FBgn0011701	repo	3R	18236192	18239602	+	2996	10.9057	3.64009	3.1116	1.03858	-1.90508	0.69787	0.00633623	0.0196196	4.56081	1.5223	-1.76503	0.745853	0.0179589	0.0376863	16.1204	5.38065	0.458866	0.583678	0.431773	0.846216
FBgn0011703	RnrL	2L	10325026	10327943	-	2577	1207.33	468.501	1159.06	449.77	-0.0601219	0.164717	0.71511	0.803468	580.399	225.223	-1.02939	0.169342	1.21115e-09	9.8539e-09	1218.87	472.981	0.0126312	0.164427	0.938767	0.988714
FBgn0011704	RnrS	2R	11983145	11985393	-	1593	426.131	267.502	689.965	433.123	0.685609	0.193631	0.000398921	0.00184724	897.074	563.135	1.07913	0.195121	3.19217e-08	2.10572e-07	996.178	625.347	1.21635	0.192764	2.78906e-10	5.99787e-07
FBgn0011705	rost	2L	8985936	8989539	-	1671	236.845	141.739	92.7803	55.5238	-1.34932	0.171749	3.95459e-15	1.29771e-13	110.331	66.0267	-1.15373	0.18005	1.47632e-10	1.34789e-09	233.38	139.665	-0.0159779	0.159842	0.920376	0.985446
FBgn0011706	rpr	3L	18397535	18398435	-	901	12.3817	13.7422	113.215	125.655	3.13919	0.380854	1.68614e-16	6.69798e-15	482.002	534.963	5.20702	0.377899	3.41559e-43	4.29653e-41	9.58612	10.6394	-0.42064	0.434362	0.332841	0.807512
FBgn0011708	Syx5	2L	16307346	16309274	+	1861	1130.57	607.508	1319.96	709.274	0.22961	0.198667	0.247781	0.3739	1828.07	982.306	0.70032	0.199379	0.000443911	0.00140675	953.624	512.426	-0.239481	0.198841	0.22844	0.742366
FBgn0011710	44440	X	21358286	21361688	+	2026	1878.48	927.187	2672.54	1319.12	0.506756	0.160606	0.00160348	0.00610199	2595.26	1280.98	0.470716	0.161493	0.00355943	0.00915845	2164.63	1068.43	0.202691	0.160631	0.207006	0.729382
FBgn0011715	Snr1	3R	5470926	5472754	+	1335	434.357	325.361	614.424	460.243	0.502094	0.178492	0.00490841	0.0158148	514.292	385.237	0.269399	0.182335	0.139543	0.214647	463.438	347.145	0.0968498	0.178782	0.588012	0.903723
FBgn0011722	Tig	2L	6415179	6423310	-	7018	31.754	4.52465	37.2891	5.31335	0.184619	0.355243	0.603275	0.715041	39.4675	5.62376	0.340993	0.368325	0.354553	0.458675	19.5394	2.78419	-0.748786	0.367739	0.0417313	0.527901
FBgn0011723	byn	3L	11927693	11935919	+	2650	0	0	0	0	0	4.40736	1	NA	0.25256	0.0953058	0.992539	4.38784	0.821044	NA	0	0	0	4.40736	1	NA
FBgn0011725	twin	3R	24196893	24221965	-	4723	803.597	170.145	737.291	156.106	-0.120711	0.250648	0.630094	0.737212	1096.17	232.093	0.437177	0.25151	0.0821739	0.138233	657.29	139.168	-0.286387	0.250564	0.253051	0.762404
FBgn0011726	tsr	2R	24044453	24046805	-	735	1310.32	1782.75	1269.26	1726.89	-0.0448395	0.290765	0.877442	0.922353	933.975	1270.71	-0.474268	0.292364	0.104764	0.168595	1232.85	1677.34	-0.0865877	0.290664	0.765782	0.953514
FBgn0011737	Wee1	2L	6911090	6914138	-	2652	244.643	92.2484	389.097	146.718	0.656555	0.142481	4.0654e-06	3.23269e-05	379.761	143.198	0.617655	0.147416	2.79116e-05	0.000112604	239.071	90.1473	-0.0456056	0.144323	0.752006	0.94909
FBgn0011739	wts	3R	30789625	30806619	-	5803	3388.11	583.855	3005.05	517.843	-0.17421	0.206651	0.399219	0.533607	3992.82	688.061	0.233178	0.206997	0.259961	0.35717	3331.55	574.109	-0.0256253	0.206543	0.901262	0.982021
FBgn0011740	alpha-Man-IIa	3R	9412548	9417264	+	4002	189.702	47.4019	173.321	43.3086	-0.141406	0.214732	0.510203	0.636738	127.186	31.7805	-0.546213	0.225855	0.0155878	0.0333836	199.746	49.9115	0.0606024	0.212743	0.77575	0.954154
FBgn0011741	Arp6	X	15735774	15737120	-	1347	230.108	170.83	112.049	83.184	-1.02005	0.248698	4.10376e-05	0.000250288	65.4025	48.5542	-1.68321	0.267059	2.92345e-10	2.56318e-09	195.354	145.029	-0.219315	0.243533	0.367824	0.820131
FBgn0011742	Arp2	X	16548290	16553968	-	2729	388.708	142.436	417.306	152.915	0.10526	0.151352	0.486764	0.615815	380.192	139.316	0.00472231	0.156356	0.975906	0.983151	402.334	147.429	0.0519329	0.150802	0.730561	0.94581
FBgn0011743	Arp53D	2R	16774246	16775676	+	1378	0	0	0	0	NA	NA	NA	NA	0	0	NA	NA	NA	NA	0	0	NA	NA	NA	NA
FBgn0011745	Arp1	3R	12691743	12694232	+	1469	570.106	388.091	849.344	578.178	0.574727	0.26625	0.0308811	0.0725525	779.913	530.914	0.469324	0.26806	0.0799775	0.134965	595.613	405.455	0.0632219	0.266494	0.812474	0.961881
FBgn0011746	ana	2R	9062295	9077554	+	2611	57.8779	22.167	5.52832	2.11732	-3.36257	0.449766	7.64597e-14	2.13075e-12	21.6209	8.2807	-1.74428	0.397423	1.13878e-05	4.96819e-05	55.2943	21.1774	-0.0836108	0.338319	0.804803	0.960865
FBgn0011747	Ank	4	115074	129849	-	6229	2128.9	341.772	1578.13	253.352	-0.432913	0.434461	0.319037	0.452619	890.169	142.907	-1.25236	0.435734	0.00405125	0.0102779	2317.74	372.088	0.121488	0.434288	0.779677	0.955246
FBgn0011754	PhKgamma	X	11695137	11704394	+	3300	808.162	244.898	773.457	234.381	-0.0627626	0.36212	0.8624	0.911282	1250.45	378.925	0.619629	0.362581	0.0874624	0.145455	765.665	232.02	-0.0772969	0.361971	0.830902	0.964497
FBgn0011758	B-H1	X	17397478	17403278	+	2724	0	0	0.631908	0.231978	1.34554	4.35077	0.75712	NA	0	0	0	4.40736	1	NA	0	0	0	4.40736	1	NA
FBgn0011760	ctp	X	4687800	4702034	+	4645	15181.9	3268.44	7186.67	1547.18	-1.07877	0.430142	0.0121438	0.0338211	8674.78	1867.55	-0.808099	0.430229	0.0603402	0.106303	9425.87	2029.25	-0.687451	0.43011	0.109973	0.662571
FBgn0011761	dhd	X	5312171	5313125	+	955	0	0	0	0	0	4.40736	1	NA	0	0	0	4.40736	1	NA	0.223579	0.234114	-0.0223957	4.40736	0.995946	NA
FBgn0011762	DNApol-alpha50	3L	8340314	8344404	+	1569	37.6787	24.0145	80.4038	51.2452	1.09707	0.386084	0.00448968	0.0146586	42.9105	27.349	0.331628	0.406145	0.414199	0.518507	39.7654	25.3445	0.0840156	0.392293	0.830418	0.964393
FBgn0011763	Dp	2R	13222433	13228202	+	3198	1270.84	397.385	1044.76	326.691	-0.281036	0.105187	0.00754482	0.0227324	657.541	205.61	-0.934048	0.110392	2.64648e-17	5.49751e-16	1251.44	391.319	-0.0204946	0.104437	0.844423	0.969143
FBgn0011766	E2f1	3R	21620304	21660871	-	6451	14949.5	2317.39	9009.97	1396.68	-0.730301	0.395874	0.0650691	0.132374	7684.71	1191.24	-0.961009	0.396012	0.0152362	0.0327079	8254.86	1279.63	-0.856572	0.395867	0.0304808	0.475555
FBgn0011768	Fdh	3R	10870906	10872381	-	1337	88.38	66.1032	30.3191	22.6769	-1.53419	0.292852	1.61651e-07	1.69846e-06	27.8024	20.7946	-1.66638	0.316993	1.46567e-07	8.7479e-07	105.078	78.5925	0.273692	0.268066	0.307261	0.800442
FBgn0011769	Fdx1	3L	9370195	9371238	-	741	31.3731	42.3389	12.4728	16.8324	-1.304	0.402295	0.00118944	0.00477094	6.29844	8.49991	-1.88083	0.467041	5.6463e-05	0.00021523	27.789	37.502	-0.142842	0.366467	0.696699	0.934742
FBgn0011770	Gip	X	10328877	10329872	-	996	29.4098	29.5279	15.2142	15.2753	-0.918823	0.3823	0.0162431	0.0430283	17.7078	17.7789	-0.857652	0.406993	0.0350926	0.0669406	33.7879	33.9236	0.247232	0.351376	0.481676	0.86314
FBgn0011771	Hem	3L	22284354	22288195	-	3777	208.766	55.2729	355.905	94.2295	0.753789	0.140485	8.06676e-08	8.82309e-07	424.385	112.36	0.989371	0.144095	6.59731e-12	7.07123e-11	187.857	49.7371	-0.168575	0.143751	0.240921	0.752671
FBgn0011774	Irbp	3R	11410047	11412440	+	2149	168.846	78.5694	183.568	85.4201	0.122359	0.231278	0.596767	0.70987	167.805	78.0854	-0.0896814	0.239755	0.708364	0.782874	162.616	75.6706	-0.0496311	0.230948	0.829844	0.964108
FBgn0011785	BRWD3	3R	24319000	24328619	+	7244	1216.88	167.985	1557.01	214.938	0.352045	0.255993	0.169066	0.280394	2063.4	284.843	0.754168	0.256533	0.00328378	0.00853896	1215.5	167.793	-0.00535317	0.256048	0.98332	0.999184
FBgn0011787	mRpL12	3L	8956791	8957584	+	738	171.595	232.514	112.037	151.812	-0.598604	0.188816	0.00152275	0.00586127	82.2583	111.461	-0.942118	0.203674	3.73475e-06	1.77283e-05	173.026	234.453	0.0312505	0.182793	0.864254	0.974468
FBgn0011802	Gem3	3L	10459081	10463101	-	3963	355.803	89.7811	456.233	115.123	0.362471	0.141978	0.0106797	0.0304457	369.925	93.3447	0.0783996	0.147827	0.595871	0.687752	341.912	86.276	-0.0509481	0.142501	0.720696	0.942665
FBgn0011812	Lcp1Psi	2R	8432886	8433384	-	456	0	0	0	0	NA	NA	NA	NA	0	0	NA	NA	NA	NA	0	0	NA	NA	NA	NA
FBgn0011817	nmo	3L	7979046	8054147	+	6945	1827.44	263.131	730.619	105.201	-1.32148	0.449328	0.00327147	0.0111306	1228.22	176.849	-0.57957	0.449676	0.197446	0.285811	1060.45	152.692	-0.783887	0.448972	0.0808183	0.62282
FBgn0011818	oaf	2L	2492955	2498846	+	3223	1228.78	381.255	1233.42	382.692	0.00685012	0.304425	0.982048	0.989877	3066.78	951.529	1.31648	0.30439	1.52556e-05	6.49528e-05	1127.45	349.814	-0.123114	0.304366	0.685849	0.931258
FBgn0011822	Pgcl	X	436139	437448	-	1310	4.12376	3.14791	0.944066	0.720661	-2.17968	1.08584	0.0447097	0.0979526	2.43038	1.85526	-1.27235	1.03884	0.220658	0.312656	5.41136	4.13081	0.226777	0.852934	0.790333	0.95627
FBgn0011824	CG4038	2R	21095958	21097305	-	957	425.147	444.25	178.743	186.775	-1.24191	0.292112	2.12343e-05	0.000139261	168.827	176.413	-1.35659	0.299002	5.7042e-06	2.62782e-05	334.931	349.98	-0.333926	0.28917	0.248183	0.755767
FBgn0011826	Pp2B-14D	X	16554627	16560016	-	5390	1529.61	283.786	1356.26	251.626	-0.171162	0.324237	0.597574	0.710266	1622.39	300.999	0.0811489	0.324852	0.80274	0.857967	1004.51	186.365	-0.604235	0.324322	0.0624526	0.57806
FBgn0011828	Pxn	3L	2601455	2630064	-	5955	37.3248	6.26781	230.412	38.6921	2.5388	0.279627	1.09339e-19	6.47243e-18	214.475	36.016	2.45187	0.284902	7.56346e-18	1.63881e-16	45.3681	7.61848	0.193987	0.293365	0.508452	0.877901
FBgn0011829	Ret	2L	21182446	21198762	-	4912	244.511	49.7783	187.552	38.1824	-0.392387	0.421479	0.351866	0.485879	173.649	35.352	-0.481316	0.426353	0.258935	0.356358	272.225	55.4205	0.143988	0.420006	0.731731	0.946312
FBgn0011832	Ser12	2L	2250431	2251275	-	845	0	0	0	0	NA	NA	NA	NA	0	0	NA	NA	NA	NA	0	0	NA	NA	NA	NA
FBgn0011834	Ser6	X	20962605	20963505	-	901	0	0	0	0	NA	NA	NA	NA	0	0	NA	NA	NA	NA	0	0	NA	NA	NA	NA
FBgn0011836	Taf2	3L	9884411	9888683	-	3972	672.264	169.251	608.437	153.181	-0.138613	0.312955	0.657826	0.759288	633.802	159.568	-0.09148	0.314754	0.771327	0.833243	471.733	118.765	-0.505208	0.313079	0.106598	0.65613
FBgn0011837	Tis11	X	12659415	12682560	+	5015	7313.03	1458.23	4744.52	946.067	-0.624003	0.402884	0.12142	0.21669	8456.84	1686.31	0.208448	0.402932	0.604928	0.695342	5223.48	1041.57	-0.48526	0.40285	0.22837	0.742366
FBgn0011840	tRNA:Ala-AGC-2-3	3R	17620144	17620216	-	73	0	0	0	0	NA	NA	NA	NA	0	0	NA	NA	NA	NA	0	0	NA	NA	NA	NA
FBgn0011844	tRNA:Asp-GTC-1-10	3L	13249547	13249618	+	72	0	0	0	0	NA	NA	NA	NA	0	0	NA	NA	NA	NA	0	0	NA	NA	NA	NA
FBgn0011845	tRNA:Asp-GTC-1-11	3R	24555302	24555373	+	72	0.328379	4.56082	0.252983	3.51365	-0.74497	4.21867	0.859831	NA	0	0	-0.913768	4.21867	0.828519	NA	0.482516	6.70162	0.00797415	4.16948	0.998474	NA
FBgn0011848	tRNA:Glu-TTC-1-6	2R	19727981	19728052	-	72	0	0	0	0	NA	NA	NA	NA	0	0	NA	NA	NA	NA	0	0	NA	NA	NA	NA
FBgn0011849	tRNA:Glu-TTC-1-5	2R	19727460	19727531	-	72	0	0	0	0	NA	NA	NA	NA	0	0	NA	NA	NA	NA	0	0	NA	NA	NA	NA
FBgn0011850	tRNA:Glu-TTC-1-4	2R	19726142	19726213	-	72	0	0	0	0	NA	NA	NA	NA	0	0	NA	NA	NA	NA	0	0	NA	NA	NA	NA
FBgn0011851	tRNA:Glu-CTC-3-4	3L	1397695	1397766	+	72	0	0	0	0	NA	NA	NA	NA	0	0	NA	NA	NA	NA	0	0	NA	NA	NA	NA
FBgn0011852	tRNA:Glu-CTC-3-5	3L	1397932	1398003	+	72	0	0	0	0	NA	NA	NA	NA	0	0	NA	NA	NA	NA	0	0	NA	NA	NA	NA
FBgn0011853	tRNA:Glu-CTC-3-6	3L	1398169	1398240	+	72	0	0	0	0	NA	NA	NA	NA	0	0	NA	NA	NA	NA	0	0	NA	NA	NA	NA
FBgn0011854	tRNA:Glu-CTC-3-8	3L	1401440	1401511	+	72	0	0	0	0	NA	NA	NA	NA	0	0	NA	NA	NA	NA	0	0	NA	NA	NA	NA
FBgn0011855	tRNA:Glu-CTC-3-9	3L	1401781	1401852	+	72	0	0	0	0	NA	NA	NA	NA	0	0	NA	NA	NA	NA	0	0	NA	NA	NA	NA
FBgn0011858	tRNA:Phe-GAA-1-8	3R	16321403	16321475	+	73	0	0	0	0	NA	NA	NA	NA	0	0	NA	NA	NA	NA	0	0	NA	NA	NA	NA
FBgn0011859	tRNA:Gly-GCC-1-1	2L	1938089	1938159	-	71	0	0	0	0	NA	NA	NA	NA	0	0	NA	NA	NA	NA	0	0	NA	NA	NA	NA
FBgn0011860	tRNA:Gly-GCC-1-2	2L	2031692	2031762	+	71	0	0	0	0	NA	NA	NA	NA	0	0	NA	NA	NA	NA	0	0	NA	NA	NA	NA
FBgn0011861	tRNA:Gly-GCC-1-3	2L	7872849	7872919	+	71	0	0	0	0	NA	NA	NA	NA	0	0	NA	NA	NA	NA	0	0	NA	NA	NA	NA
FBgn0011862	tRNA:Gly-GCC-1-4	2L	14518091	14518161	+	71	0	0	0	0	NA	NA	NA	NA	0	0	NA	NA	NA	NA	0	0	NA	NA	NA	NA
FBgn0011863	tRNA:Gly-GCC-1-5	2L	14518307	14518377	-	71	0	0	0	0	NA	NA	NA	NA	0	0	NA	NA	NA	NA	0	0	NA	NA	NA	NA
FBgn0011864	tRNA:Gly-GCC-1-6	2L	14518621	14518691	-	71	0	0	0	0	NA	NA	NA	NA	0	0	NA	NA	NA	NA	0	0	NA	NA	NA	NA
FBgn0011865	tRNA:Gly-GCC-1-7	2L	14530546	14530616	-	71	0	0	0	0	NA	NA	NA	NA	0	0	NA	NA	NA	NA	0	0	NA	NA	NA	NA
FBgn0011866	tRNA:Gly-GCC-2-1	2L	14530854	14530924	-	71	0	0	0	0	NA	NA	NA	NA	0	0	NA	NA	NA	NA	0	0	NA	NA	NA	NA
FBgn0011867	tRNA:Gly-GCC-1-8	2R	16968008	16968078	+	71	0	0	0	0	NA	NA	NA	NA	0	0	NA	NA	NA	NA	0	0	NA	NA	NA	NA
FBgn0011868	tRNA:Gly-GCC-1-9	2R	18639726	18639796	-	71	0	0	0	0	NA	NA	NA	NA	0	0	NA	NA	NA	NA	0	0	NA	NA	NA	NA
FBgn0011869	tRNA:Gly-GCC-1-10	2R	20229481	20229551	+	71	0	0	0.230361	3.24452	0.2168	4.40736	0.960767	NA	0	0	0	4.40736	1	NA	0	0	0	4.40736	1	NA
FBgn0011870	tRNA:Gly-GCC-1-11	2R	20232797	20232867	+	71	0	0	0	0	NA	NA	NA	NA	0	0	NA	NA	NA	NA	0	0	NA	NA	NA	NA
FBgn0011871	tRNA:Gly-GCC-1-12	2R	21161356	21161426	-	71	0	0	0	0	NA	NA	NA	NA	0	0	NA	NA	NA	NA	0	0	NA	NA	NA	NA
FBgn0011872	tRNA:Gly-GCC-1-13	2R	21182856	21182926	+	71	0	0	0	0	NA	NA	NA	NA	0	0	NA	NA	NA	NA	0	0	NA	NA	NA	NA
FBgn0011877	tRNA:His-GTG-2-1Psi	2R	12336733	12336804	+	72	0.365022	5.06975	0	0	-1.70673	4.40736	0.698575	NA	0	0	-0.913739	4.40736	0.835759	NA	0	0	-1.94592	4.40736	0.658839	NA
FBgn0011878	tRNA:His-GTG-1-4	2R	12336418	12336489	+	72	0	0	0	0	NA	NA	NA	NA	0	0	NA	NA	NA	NA	0	0	NA	NA	NA	NA
FBgn0011879	tRNA:Ala-TGC-2-1	2R	17392215	17392286	+	72	0	0	0	0	NA	NA	NA	NA	0	0	NA	NA	NA	NA	0	0	NA	NA	NA	NA
FBgn0011880	tRNA:Ile-AAT-1-1	2R	6166151	6166224	+	74	0	0	0	0	NA	NA	NA	NA	0	0	NA	NA	NA	NA	0	0	NA	NA	NA	NA
FBgn0011881	tRNA:Ile-AAT-1-3	2R	13430282	13430355	-	74	0	0	0	0	0	4.40736	1	NA	0.552518	7.46646	1.71872	4.35253	0.692933	NA	0	0	0	4.40736	1	NA
FBgn0011882	tRNA:Ile-AAT-1-4	2R	13430984	13431057	+	74	0	0	0	0	NA	NA	NA	NA	0	0	NA	NA	NA	NA	0	0	NA	NA	NA	NA
FBgn0011883	tRNA:Ile-AAT-1-5	2R	13431285	13431358	+	74	0	0	0	0	NA	NA	NA	NA	0	0	NA	NA	NA	NA	0	0	NA	NA	NA	NA
FBgn0011884	tRNA:Ile-AAT-1-6	2R	13431777	13431850	+	74	0	0	0	0	NA	NA	NA	NA	0	0	NA	NA	NA	NA	0	0	NA	NA	NA	NA
FBgn0011885	tRNA:Ile-AAT-1-7	2R	13432093	13432166	+	74	0	0	0	0	NA	NA	NA	NA	0	0	NA	NA	NA	NA	0	0	NA	NA	NA	NA
FBgn0011887	tRNA:Lys-CTT-1-4	2R	6165984	6166056	+	73	0	0	0	0	NA	NA	NA	NA	0	0	NA	NA	NA	NA	0	0	NA	NA	NA	NA
FBgn0011888	tRNA:Lys-CTT-1-3	2R	6164876	6164948	-	73	0	0	0	0	NA	NA	NA	NA	0	0	NA	NA	NA	NA	0	0	NA	NA	NA	NA
FBgn0011889	tRNA:Lys-CTT-1-2	2R	6162681	6162753	-	73	0	0	0	0	NA	NA	NA	NA	0	0	NA	NA	NA	NA	0	0	NA	NA	NA	NA
FBgn0011890	tRNA:Lys-CTT-1-5	2R	6171496	6171568	-	73	0	0	0	0	NA	NA	NA	NA	0	0	NA	NA	NA	NA	0	0	NA	NA	NA	NA
FBgn0011891	tRNA:Lys-CTT-1-1	2R	6142372	6142444	-	73	0	0	0	0	NA	NA	NA	NA	0	0	NA	NA	NA	NA	0	0	NA	NA	NA	NA
FBgn0011892	tRNA:Lys-CTT-1-6	2R	6946808	6946880	-	73	0	0	0.230361	3.15563	0.2168	4.40736	0.960767	NA	0	0	0	4.40736	1	NA	0	0	0	4.40736	1	NA
FBgn0011893	tRNA:Lys-CTT-1-7	2R	6947738	6947810	-	73	0.723128	9.90587	0.252983	3.46552	-0.74495	4.40736	0.865778	NA	0	0	-0.913748	4.40736	0.835757	NA	0	0	-1.94593	4.40736	0.658837	NA
FBgn0011894	tRNA:Lys-CTT-1-8	2R	6948284	6948356	-	73	0	0	0	0	NA	NA	NA	NA	0	0	NA	NA	NA	NA	0	0	NA	NA	NA	NA
FBgn0011895	tRNA:Lys-CTT-1-9	2R	6949133	6949205	-	73	0	0	0.460722	6.31126	0.943433	4.38307	0.829576	NA	0	0	0	4.40736	1	NA	0.447157	6.12544	0.872938	4.36805	0.841601	NA
FBgn0011896	tRNA:Lys-CTT-1-10	2R	13536045	13536117	-	73	0	0	0	0	NA	NA	NA	NA	0	0	NA	NA	NA	NA	0	0	NA	NA	NA	NA
FBgn0011897	tRNA:Lys-CTT-1-11	2R	19802591	19802663	+	73	0	0	0	0	NA	NA	NA	NA	0	0	NA	NA	NA	NA	0	0	NA	NA	NA	NA
FBgn0011902	tRNA:Lys-TTT-1-1	2L	8290727	8290799	+	73	0	0	0	0	NA	NA	NA	NA	0	0	NA	NA	NA	NA	0	0	NA	NA	NA	NA
FBgn0011904	tRNA:Lys-TTT-2-4	3R	6822963	6823035	-	73	0	0	0	0	NA	NA	NA	NA	0	0	NA	NA	NA	NA	0	0	NA	NA	NA	NA
FBgn0011905	tRNA:Lys-TTT-2-5	3R	12131356	12131427	+	72	0	0	0	0	NA	NA	NA	NA	0	0	NA	NA	NA	NA	0	0	NA	NA	NA	NA
FBgn0011906	tRNA:Leu-CAG-1-1	2R	8683215	8683297	+	83	0	0	0	0	NA	NA	NA	NA	0	0	NA	NA	NA	NA	0	0	NA	NA	NA	NA
FBgn0011909	tRNA:Leu-CAA-2-1	2R	13430695	13430815	-	83	0	0	0	0	NA	NA	NA	NA	0	0	NA	NA	NA	NA	0	0	NA	NA	NA	NA
FBgn0011910	tRNA:Leu-CAA-1-1	2R	13432668	13432794	+	83	0	0	0	0	NA	NA	NA	NA	0	0	NA	NA	NA	NA	0	0	NA	NA	NA	NA
FBgn0011915	tRNA:Met-CAT-1-1	2R	11652649	11652721	+	73	0	0	0	0	NA	NA	NA	NA	0	0	NA	NA	NA	NA	0	0	NA	NA	NA	NA
FBgn0011916	tRNA:Met-CAT-1-2	2R	11660563	11660635	-	73	0	0	0	0	NA	NA	NA	NA	0	0	NA	NA	NA	NA	0	0	NA	NA	NA	NA
FBgn0011919	tRNA:Met-CAT-1-5	3R	6496039	6496111	-	73	0	0	0	0	NA	NA	NA	NA	0	0	NA	NA	NA	NA	0	0	NA	NA	NA	NA
FBgn0011921	tRNA:iMet-CAT-2-1	2R	9661225	9661296	+	72	0	0	0	0	NA	NA	NA	NA	0	0	NA	NA	NA	NA	0	0	NA	NA	NA	NA
FBgn0011927	tRNA:iMet-CAT-1-4	3L	14673942	14674013	-	72	0	0	0	0	NA	NA	NA	NA	0	0	NA	NA	NA	NA	0	0	NA	NA	NA	NA
FBgn0011928	tRNA:iMet-CAT-1-5	3L	14674344	14674415	+	72	0	0	0	0	NA	NA	NA	NA	0	0	NA	NA	NA	NA	0	0	NA	NA	NA	NA
FBgn0011931	tRNA:Asn-GTT-1-6	2R	6162519	6162592	+	74	0	0	0	0	NA	NA	NA	NA	0	0	NA	NA	NA	NA	0	0	NA	NA	NA	NA
FBgn0011932	tRNA:Asn-GTT-1-5	2R	6162197	6162270	+	74	0	0	0	0	NA	NA	NA	NA	0	0	NA	NA	NA	NA	0	0	NA	NA	NA	NA
FBgn0011933	tRNA:Asn-GTT-1-4	2R	6162023	6162096	-	74	0	0	0	0	NA	NA	NA	NA	0	0	NA	NA	NA	NA	0	0	NA	NA	NA	NA
FBgn0011934	tRNA:Asn-GTT-1-8	2R	6190372	6190445	+	74	0	0	0	0	NA	NA	NA	NA	0	0	NA	NA	NA	NA	0	0	NA	NA	NA	NA
FBgn0011935	tRNA:Asn-GTT-1-7	2R	6190129	6190202	-	74	0	0	0	0	NA	NA	NA	NA	0	0	NA	NA	NA	NA	0	0	NA	NA	NA	NA
FBgn0011936	tRNA:Asn-GTT-1-3	2R	6153506	6153579	-	74	0	0	0	0	NA	NA	NA	NA	0	0	NA	NA	NA	NA	0	0	NA	NA	NA	NA
FBgn0011937	tRNA:Asn-GTT-1-2	2R	6153186	6153259	+	74	0	0	0	0	NA	NA	NA	NA	0	0	NA	NA	NA	NA	0	0	NA	NA	NA	NA
FBgn0011938	tRNA:Asn-GTT-1-1	2R	6152603	6152676	-	74	0	0	0	0	NA	NA	NA	NA	0	0	NA	NA	NA	NA	0	0	NA	NA	NA	NA
FBgn0011944	tRNA:Pro-TGG-1-1	3R	17618110	17618181	-	72	0	0	0	0	NA	NA	NA	NA	0	0	NA	NA	NA	NA	0	0	NA	NA	NA	NA
FBgn0011945	tRNA:Pro-TGG-1-2	3R	17619961	17620032	+	72	0	0	0	0	NA	NA	NA	NA	0	0	NA	NA	NA	NA	0	0	NA	NA	NA	NA
FBgn0011948	tRNA:Arg-TCG-3-1	X	14016203	14016275	+	73	0	0	0	0	NA	NA	NA	NA	0	0	NA	NA	NA	NA	0	0	NA	NA	NA	NA
FBgn0011949	tRNA:Arg-TCG-3-2	X	14016808	14016880	+	73	0	0	0	0	NA	NA	NA	NA	0	0	NA	NA	NA	NA	0	0	NA	NA	NA	NA
FBgn0011950	tRNA:Arg-TCG-3-3	X	14017010	14017082	+	73	0	0	0	0	NA	NA	NA	NA	0	0	NA	NA	NA	NA	0	0	NA	NA	NA	NA
FBgn0011951	tRNA:Arg-TCG-3-4	X	14017212	14017284	+	73	0	0	0	0	NA	NA	NA	NA	0	0	NA	NA	NA	NA	0	0	NA	NA	NA	NA
FBgn0011952	tRNA:Arg-TCG-2-1	X	14014814	14014886	+	73	0	0	0	0	NA	NA	NA	NA	0	0	NA	NA	NA	NA	0	0	NA	NA	NA	NA
FBgn0011953	tRNA:Arg-TCG-1-1	X	14103719	14103791	-	73	0	0	0	0	NA	NA	NA	NA	0	0	NA	NA	NA	NA	0	0	NA	NA	NA	NA
FBgn0011954	tRNA:Arg-TCG-2-2	X	21232091	21232163	+	73	0	0	0	0	NA	NA	NA	NA	0	0	NA	NA	NA	NA	0	0	NA	NA	NA	NA
FBgn0011955	tRNA:Arg-ACG-1-5	2R	6178584	6178656	-	73	0	0	0	0	NA	NA	NA	NA	0	0	NA	NA	NA	NA	0	0	NA	NA	NA	NA
FBgn0011956	tRNA:Arg-ACG-1-3	2R	6169607	6169679	+	73	0	0	0	0	NA	NA	NA	NA	0	0	NA	NA	NA	NA	0	0	NA	NA	NA	NA
FBgn0011957	tRNA:Arg-ACG-1-2	2R	6161535	6161607	+	73	0	0	0	0	NA	NA	NA	NA	0	0	NA	NA	NA	NA	0	0	NA	NA	NA	NA
FBgn0011958	tRNA:Arg-ACG-1-1	2R	6142165	6142237	+	73	0	0	0	0	NA	NA	NA	NA	0	0	NA	NA	NA	NA	0	0	NA	NA	NA	NA
FBgn0011959	tRNA:Arg-ACG-1-10	3R	8140970	8141042	-	73	0	0	0	0	NA	NA	NA	NA	0	0	NA	NA	NA	NA	0	0	NA	NA	NA	NA
FBgn0011960	tRNA:Arg-ACG-1-9	3R	8140727	8140799	-	73	0	0	0	0	NA	NA	NA	NA	0	0	NA	NA	NA	NA	0	0	NA	NA	NA	NA
FBgn0011961	tRNA:Arg-ACG-1-8	3R	8140476	8140548	-	73	0	0	0	0	NA	NA	NA	NA	0	0	NA	NA	NA	NA	0	0	NA	NA	NA	NA
FBgn0011962	tRNA:Arg-ACG-1-7	3R	8140223	8140295	-	73	0	0	0	0	NA	NA	NA	NA	0	0	NA	NA	NA	NA	0	0	NA	NA	NA	NA
FBgn0011963	tRNA:Arg-ACG-1-6	3R	8139951	8140023	-	73	0	0	0	0	NA	NA	NA	NA	0	0	NA	NA	NA	NA	0	0	NA	NA	NA	NA
FBgn0011965	tRNA:Arg-TCG-4-1	3R	5388228	5388300	+	73	0	0	0	0	NA	NA	NA	NA	0	0	NA	NA	NA	NA	0	0	NA	NA	NA	NA
FBgn0011966	tRNA:Arg-TCG-2-3	3R	8861880	8861952	+	73	0	0	0	0	NA	NA	NA	NA	0	0	NA	NA	NA	NA	0	0	NA	NA	NA	NA
FBgn0011970	tRNA:Ser-GCT-2-1	3R	10278054	10278135	-	82	0	0	0	0	NA	NA	NA	NA	0	0	NA	NA	NA	NA	0	0	NA	NA	NA	NA
FBgn0011971	tRNA:Ser-GCT-2-2	3R	14044525	14044606	-	82	0	0	0	0	NA	NA	NA	NA	0	0	NA	NA	NA	NA	0	0	NA	NA	NA	NA
FBgn0011974	tRNA:Ser-AGA-1-1	X	14070641	14070722	+	82	0	0	0	0	NA	NA	NA	NA	0	0	NA	NA	NA	NA	0	0	NA	NA	NA	NA
FBgn0011975	tRNA:Ser-CGA-1-1	X	14015045	14015126	+	82	0	0	0	0	NA	NA	NA	NA	0	0	NA	NA	NA	NA	0	0	NA	NA	NA	NA
FBgn0011976	tRNA:Ser-CGA-1-2	X	14015445	14015526	+	82	0	0	0	0	NA	NA	NA	NA	0	0	NA	NA	NA	NA	0	0	NA	NA	NA	NA
FBgn0011977	tRNA:Ser-CGA-1-3	X	14103363	14103444	-	82	0.328379	4.00462	0	0	-1.70673	4.40736	0.698575	NA	0	0	-0.913739	4.40736	0.835759	NA	0	0	-1.94592	4.40736	0.658839	NA
FBgn0011980	tRNA:Ser-AGA-3-1	X	14025109	14025190	-	82	0	0	0	0	NA	NA	NA	NA	0	0	NA	NA	NA	NA	0	0	NA	NA	NA	NA
FBgn0011981	tRNA:Ser-AGA-3-2	X	14104649	14104730	+	82	0	0	0	0	0	4.40736	1	NA	0	0	0	4.40736	1	NA	0.241258	2.94217	-0.0223957	4.40736	0.995946	NA
FBgn0011982	tRNA:Ser-AGA-2-1	X	14025566	14025647	-	82	0	0	0	0	NA	NA	NA	NA	0	0	NA	NA	NA	NA	0	0	NA	NA	NA	NA
FBgn0011983	tRNA:Ser-AGA-2-2	X	14117729	14117810	-	82	0	0	0	0	NA	NA	NA	NA	0	0	NA	NA	NA	NA	0	0	NA	NA	NA	NA
FBgn0011984	tRNA:Ser-AGA-2-4	2L	3173003	3173084	-	82	0	0	0	0	NA	NA	NA	NA	0	0	NA	NA	NA	NA	0	0	NA	NA	NA	NA
FBgn0011985	tRNA:Ser-AGA-2-3	2L	3169582	3169663	+	82	0	0	0	0	NA	NA	NA	NA	0	0	NA	NA	NA	NA	0	0	NA	NA	NA	NA
FBgn0011986	tRNA:Ser-AGA-2-5	3L	5342084	5342165	+	82	0	0	0	0	NA	NA	NA	NA	0	0	NA	NA	NA	NA	0	0	NA	NA	NA	NA
FBgn0011987	tRNA:SeC-TCA-1-1	2R	11357564	11357650	-	87	0	0	0	0	0	4.40736	1	NA	0	0	0	4.40736	1	NA	0.207585	2.38603	-0.0223957	4.40736	0.995946	NA
FBgn0011993	tRNA:Thr-AGT-1-5	3R	17624565	17624638	-	74	0	0	0	0	NA	NA	NA	NA	0	0	NA	NA	NA	NA	0	0	NA	NA	NA	NA
FBgn0011994	tRNA:Thr-AGT-1-6	3R	17624806	17624879	-	74	0	0	0	0	NA	NA	NA	NA	0	0	NA	NA	NA	NA	0	0	NA	NA	NA	NA
FBgn0011998	tRNA:Val-CAC-2-2	3R	7452060	7452132	+	73	0	0	0	0	0	4.40736	1	NA	0	0	0	4.40736	1	NA	0.431163	5.90634	0.826131	4.37198	0.850124	NA
FBgn0011999	tRNA:Val-CAC-2-1	3R	7451297	7451369	+	73	0	0	0	0	0	4.40736	1	NA	0	0	0	4.40736	1	NA	0.482516	6.60981	0.970853	4.36022	0.823799	NA
FBgn0012000	tRNA:Val-CAC-2-3	3R	7472060	7472132	-	73	0	0	0	0	NA	NA	NA	NA	0	0	NA	NA	NA	NA	0	0	NA	NA	NA	NA
FBgn0012001	tRNA:Val-CAC-2-4	3R	7475903	7475975	-	73	0	0	0	0	NA	NA	NA	NA	0	0	NA	NA	NA	NA	0	0	NA	NA	NA	NA
FBgn0012002	tRNA:Val-CAC-1-1	3R	17617761	17617833	+	73	0	0	0	0	NA	NA	NA	NA	0	0	NA	NA	NA	NA	0	0	NA	NA	NA	NA
FBgn0012003	tRNA:Val-CAC-2-5	3R	19672277	19672349	-	73	0	0	0	0	NA	NA	NA	NA	0	0	NA	NA	NA	NA	0	0	NA	NA	NA	NA
FBgn0012004	tRNA:Val-CAC-2-6	3R	19790122	19790194	+	73	0	0	0	0	NA	NA	NA	NA	0	0	NA	NA	NA	NA	0	0	NA	NA	NA	NA
FBgn0012009	tRNA:Val-AAC-2-4	3L	13433646	13433718	-	73	0	0	0	0	NA	NA	NA	NA	0	0	NA	NA	NA	NA	0	0	NA	NA	NA	NA
FBgn0012010	tRNA:Val-AAC-2-3	3L	13433048	13433120	+	73	0	0	0	0	NA	NA	NA	NA	0	0	NA	NA	NA	NA	0	0	NA	NA	NA	NA
FBgn0012011	tRNA:Val-AAC-1-1	3R	16321690	16321762	+	73	0	0	0.460722	6.31126	0.943442	4.38307	0.829575	NA	0.25256	3.45973	0.992523	4.38784	0.821047	NA	0	0	0	4.40736	1	NA
FBgn0012016	tRNA:Tyr-GTA-1-3	2L	2462593	2462686	+	73	0	0	0	0	NA	NA	NA	NA	0	0	NA	NA	NA	NA	0	0	NA	NA	NA	NA
FBgn0012017	tRNA:Tyr-GTA-1-2	2L	2459924	2460044	-	73	0	0	0	0	NA	NA	NA	NA	0	0	NA	NA	NA	NA	0	0	NA	NA	NA	NA
FBgn0012018	tRNA:Tyr-GTA-1-9	2L	7711476	7711661	+	73	0	0	0	0	NA	NA	NA	NA	0	0	NA	NA	NA	NA	0	0	NA	NA	NA	NA
FBgn0012024	tRNA:Tyr-GTA-1-8	3R	8669081	8669174	-	73	0	0	0	0	NA	NA	NA	NA	0	0	NA	NA	NA	NA	0	0	NA	NA	NA	NA
FBgn0012025	tRNA:Tyr-GTA-1-7	3R	8668612	8668705	-	73	0	0	0	0	NA	NA	NA	NA	0	0	NA	NA	NA	NA	0	0	NA	NA	NA	NA
FBgn0012026	tRNA:Tyr-GTA-1-6	3R	8668116	8668208	-	73	0	0	0	0	NA	NA	NA	NA	0	0	NA	NA	NA	NA	0	0	NA	NA	NA	NA
FBgn0012027	tRNA:Tyr-GTA-1-5	3R	8642701	8642793	-	73	0	0	0	0	NA	NA	NA	NA	0	0	NA	NA	NA	NA	0	0	NA	NA	NA	NA
FBgn0012028	tRNA:Tyr-GTA-1-4	3R	8642333	8642425	-	73	0	0	0	0	NA	NA	NA	NA	0	0	NA	NA	NA	NA	0	0	NA	NA	NA	NA
FBgn0012034	AcCoAS	3L	21270722	21280243	-	3605	173.276	48.0655	77.8503	21.5951	-1.15945	0.196628	3.70974e-09	5.32474e-08	60.3132	16.7304	-1.65698	0.218703	3.55261e-14	4.88255e-13	177.52	49.2428	0.0213437	0.185071	0.908186	0.983255
FBgn0012036	Aldh	2L	9387389	9391567	+	2070	3498.51	1690.1	3580.45	1729.68	0.03477	0.156882	0.824601	0.885302	3384.53	1635.04	-0.0417769	0.157599	0.790945	0.848566	4639.76	2241.43	0.408751	0.156709	0.00909805	0.297924
FBgn0012037	Ance	2L	13905645	13909212	+	2183	0.656758	0.300851	0.230361	0.105525	-1.43403	3.15774	0.649734	NA	0	0	-1.60283	3.15774	0.611743	NA	0.431163	0.197509	-0.819044	3.10742	0.792106	NA
FBgn0012042	AttA	2R	14747362	14748215	+	790	0.730044	0.924107	0.546315	0.691538	-0.614147	2.51744	0.807264	NA	0.276259	0.349695	-0.711984	2.54931	0.780026	NA	0.207585	0.262765	-1.77571	2.58847	0.492708	NA
FBgn0012051	CalpA	2R	19425113	19430564	+	3440	686.92	199.686	622.623	180.995	-0.143704	0.115434	0.213166	0.334484	574.156	166.906	-0.242041	0.119674	0.0431241	0.0799971	609.266	177.112	-0.172984	0.114894	0.132172	0.674772
FBgn0012058	Cdc27	3L	7245481	7249340	-	3713	955.352	257.299	958.572	258.167	0.010554	0.197002	0.957275	0.975337	1195.29	321.922	0.320715	0.198243	0.105708	0.169872	682.813	183.898	-0.479292	0.197268	0.0151136	0.36934
FBgn0012344	Dh44	3R	9638182	9650706	+	2402	0.365022	0.151966	0.631908	0.263076	0.301341	2.26482	0.894152	NA	0.25256	0.105146	0.0274327	2.32456	0.990584	NA	0.880006	0.366364	0.893352	2.17202	0.680853	NA
FBgn0013263	Trl	3L	14747929	14761049	-	6254	189.988	30.3787	144.034	23.0307	-0.417074	0.244503	0.0880452	0.169161	130.818	20.9174	-0.496062	0.253089	0.049992	0.0906099	242.009	38.6967	0.330789	0.240563	0.169112	0.702081
FBgn0013269	Fkbp39	3R	15331584	15333133	-	1299	3359.2	2585.99	1492.39	1148.87	-1.16955	0.284481	3.9366e-05	0.000240904	726.734	559.456	-2.20548	0.286913	1.50694e-14	2.20135e-13	2582.74	1988.25	-0.377952	0.284145	0.183473	0.711557
FBgn0013272	Gp150	2R	22317662	22329416	+	4916	8348.93	1698.32	14968	3044.74	0.841469	0.195403	1.65988e-05	0.000112023	15584.2	3170.09	0.899678	0.195524	4.19726e-06	1.97274e-05	15054.1	3062.26	0.849755	0.195387	1.36712e-05	0.00587999
FBgn0013275	Hsp70Aa	3R	11954163	11956544	-	2382	0.365022	0.153242	0.315954	0.132642	-0.744987	2.0638	0.718115	0.805744	2.65925	1.11639	2.32136	1.81587	0.201119	0.290567	0.656427	0.275578	0.478362	1.89061	0.800252	NA
FBgn0013276	Hsp70Ab	3R	11958535	11960909	+	2375	2.07329	0.872963	1.68419	0.709132	-0.344845	1.31748	0.793518	0.859676	13.9649	5.87995	2.48636	1.22447	0.0422991	0.0787143	0.896	0.377263	-1.21527	1.38551	0.380418	0.82344
FBgn0013277	Hsp70Ba	3R	12465453	12467776	-	2324	0	0	0	0	0	4.00926	1	NA	3.29801	1.41911	3.68061	3.88477	0.343412	NA	0	0	0	4.00926	1	NA
FBgn0013278	Hsp70Bb	3R	12505793	12508139	+	2347	1.37989	0.587936	1.26002	0.536864	0.0111281	1.30953	0.99322	0.99641	9.78409	4.16876	2.62593	1.19257	0.0276713	0.0544942	0.880006	0.374949	-0.525605	1.34647	0.696272	0.934742
FBgn0013279	Hsp70Bc	3R	12509076	12511461	+	2386	0	0	0.546315	0.228967	1.14774	3.2863	0.726903	NA	0.276259	0.115783	1.05348	3.31073	0.750332	NA	0.241258	0.101114	-0.0224065	3.34158	0.99465	NA
FBgn0013300	ProtA	2L	14879050	14881652	-	683	0	0	0	0	NA	NA	NA	NA	0	0	NA	NA	NA	NA	0	0	NA	NA	NA	NA
FBgn0013301	ProtB	2L	14882101	14883721	-	679	0	0	0	0	NA	NA	NA	NA	0	0	NA	NA	NA	NA	0	0	NA	NA	NA	NA
FBgn0013303	Nca	3L	19991887	19997568	+	899	80.5645	89.6157	90.2712	100.413	0.160766	0.293778	0.584217	0.699716	62.3101	69.3105	-0.230181	0.308993	0.456309	0.559696	111.24	123.737	0.463414	0.29046	0.110612	0.662571
FBgn0013305	Nmda1	2R	12877094	12880230	-	2590	845.679	326.517	399.389	154.204	-1.08119	0.293174	0.000226136	0.00112889	618.838	238.934	-0.47449	0.294384	0.107004	0.171377	715.627	276.304	-0.239696	0.291916	0.411582	0.837788
FBgn0013307	Odc1	2R	8004824	8006672	+	1253	0	0	0	0	NA	NA	NA	NA	0	0	NA	NA	NA	NA	0	0	NA	NA	NA	NA
FBgn0013308	Odc2	2R	8007246	8009062	+	1268	0	0	0	0	NA	NA	NA	NA	0	0	NA	NA	NA	NA	0	0	NA	NA	NA	NA
FBgn0013323	Ptth	2L	575711	576896	-	1128	35.6414	31.597	10.8252	9.59679	-1.73163	0.384474	6.67213e-06	5.00244e-05	7.23716	6.41592	-2.14679	0.444911	1.39859e-06	7.13235e-06	49.0162	43.4541	0.436024	0.32724	0.182719	0.710666
FBgn0013325	RpL11	2R	19442342	19443825	+	1017	11436.3	11245.1	4897.61	4815.75	-1.22279	0.173638	1.89274e-12	4.27494e-11	5083.44	4998.47	-1.1701	0.174051	1.78305e-11	1.81043e-10	11047.1	10862.5	-0.0493194	0.173434	0.776126	0.954154
FBgn0013334	Sap47	3R	15935100	15962124	+	6401	821.082	128.274	1181.97	184.654	0.526892	0.237683	0.0266379	0.0645424	2098.2	327.793	1.34609	0.238007	1.55217e-08	1.07641e-07	840.873	131.366	0.0355715	0.237863	0.881123	0.978078
FBgn0013342	nSyb	3L	1630348	1637752	-	4072	3.42345	0.840729	10.4048	2.55521	1.49484	0.652258	0.0219181	0.0551422	15.9574	3.91882	2.18549	0.655063	0.000849018	0.00252614	5.65599	1.38899	0.601009	0.675003	0.373262	0.821574
FBgn0013343	Syx1A	3R	24101600	24105763	-	4164	3285.63	789.056	4295.55	1031.59	0.387139	0.479906	0.419841	0.553333	12441.6	2987.91	1.92062	0.479882	6.27371e-05	0.000236264	2177.34	522.896	-0.593133	0.479995	0.216568	0.731421
FBgn0013347	TfIIA-S	3R	23890388	23891060	-	617	858.551	1391.49	1308.05	2120.02	0.607596	0.358801	0.090378	0.172556	1012.15	1640.44	0.248045	0.359987	0.4908	0.591114	936.625	1518.03	0.125783	0.358904	0.72599	0.945347
FBgn0013348	TpnC41C	2R	5065237	5070210	-	1880	0	0	0.483344	0.257098	1.03299	2.45358	0.673747	NA	1.3102	0.696914	2.69266	2.35105	0.252084	NA	0.622754	0.331252	1.38165	2.37706	0.561077	NA
FBgn0013432	bcn92	X	2148463	2149647	-	748	926.941	1239.23	490.544	655.808	-0.912909	0.300786	0.00240476	0.00859847	389.144	520.246	-1.24817	0.304266	4.09189e-05	0.000159468	658.052	879.749	-0.488717	0.300085	0.103399	0.652429
FBgn0013433	beat-Ia	2L	16049965	16081684	+	2870	0	0	0	0	NA	NA	NA	NA	0	0	NA	NA	NA	NA	0	0	NA	NA	NA	NA
FBgn0013435	Cdc2rk	2R	10067217	10068702	-	1251	74.3246	59.4121	53.7504	42.966	-0.442174	0.255065	0.0829944	0.161721	41.8288	33.4363	-0.631727	0.273182	0.0207512	0.0427145	64.051	51.1999	-0.190717	0.249179	0.444045	0.850452
FBgn0013467	igl	2R	15155437	15190292	+	2894	0	0	0.252983	0.0874164	0.2168	4.40736	0.960767	NA	0	0	0	4.40736	1	NA	0	0	0	4.40736	1	NA
FBgn0013469	klu	3L	10981171	11009188	-	4792	115.199	24.0398	4.09981	0.855553	-4.84106	0.501868	5.10724e-22	3.92002e-20	4.07939	0.851292	-5.43629	0.643069	2.8228e-17	5.85036e-16	38.6632	8.06828	-1.5574	0.354993	1.14853e-05	0.00575245
FBgn0013531	MED20	2L	8071812	8072848	-	1037	22.5158	21.7125	50.5472	48.7437	1.18068	0.317964	0.000204618	0.00103474	60.2247	58.0759	1.54399	0.324901	2.01238e-06	1.00089e-05	21.9348	21.1522	-0.018119	0.33368	0.956696	0.992865
FBgn0013548	l(2)dtl	2R	23702477	23705403	+	2653	214.437	80.828	232.985	87.8195	0.0963596	0.196968	0.62469	0.732688	178.227	67.1794	-0.271753	0.205953	0.187005	0.273531	245.622	92.5829	0.173546	0.195752	0.375314	0.821574
FBgn0013563	Pex1	3L	14071892	14076123	+	3275	107.725	32.893	144.569	44.1432	0.400747	0.197111	0.0420419	0.0928716	154.661	47.2248	0.505507	0.204157	0.0132835	0.0290952	111.191	33.9516	0.0184472	0.198075	0.925798	0.986687
FBgn0013576	mtd	3R	5270116	5350443	-	13741	2215.45	161.229	2248.25	163.616	0.0202195	0.167152	0.903719	0.940911	2703.87	196.774	0.279514	0.167846	0.0958523	0.15659	2552.46	185.755	0.203189	0.166961	0.223612	0.735005
FBgn0013672	mt:ATPase6	mitochondrion_genome	4062	4736	+	675	0	0	0	0	NA	NA	NA	NA	0	0	NA	NA	NA	NA	0	0	NA	NA	NA	NA
FBgn0013673	mt:ATPase8	mitochondrion_genome	3907	4068	+	162	0	0	0	0	NA	NA	NA	NA	0	0	NA	NA	NA	NA	0	0	NA	NA	NA	NA
FBgn0013674	mt:CoI	mitochondrion_genome	1474	3009	+	1536	0	0	0	0	NA	NA	NA	NA	0	0	NA	NA	NA	NA	0	0	NA	NA	NA	NA
FBgn0013675	mt:CoII	mitochondrion_genome	3083	3767	+	685	0	0	0	0	NA	NA	NA	NA	0	0	NA	NA	NA	NA	0	0	NA	NA	NA	NA
FBgn0013676	mt:CoIII	mitochondrion_genome	4736	5524	+	789	0	0	0	0	NA	NA	NA	NA	0	0	NA	NA	NA	NA	0	0	NA	NA	NA	NA
FBgn0013678	mt:Cyt-b	mitochondrion_genome	10499	11635	+	1137	0	0	0	0	NA	NA	NA	NA	0	0	NA	NA	NA	NA	0	0	NA	NA	NA	NA
FBgn0013679	mt:ND1	mitochondrion_genome	11721	12659	-	939	0	0	0	0	NA	NA	NA	NA	0	0	NA	NA	NA	NA	0	0	NA	NA	NA	NA
FBgn0013680	mt:ND2	mitochondrion_genome	240	1263	+	1024	0	0	0	0	NA	NA	NA	NA	0	0	NA	NA	NA	NA	0	0	NA	NA	NA	NA
FBgn0013681	mt:ND3	mitochondrion_genome	5608	5961	+	354	0	0	0	0	NA	NA	NA	NA	0	0	NA	NA	NA	NA	0	0	NA	NA	NA	NA
FBgn0013683	mt:ND4L	mitochondrion_genome	9545	9835	-	291	0	0	0	0	NA	NA	NA	NA	0	0	NA	NA	NA	NA	0	0	NA	NA	NA	NA
FBgn0013684	mt:ND5	mitochondrion_genome	6409	8125	-	1717	0	0	0	0	NA	NA	NA	NA	0	0	NA	NA	NA	NA	0	0	NA	NA	NA	NA
FBgn0013685	mt:ND6	mitochondrion_genome	9971	10495	+	525	0	0	0	0	NA	NA	NA	NA	0	0	NA	NA	NA	NA	0	0	NA	NA	NA	NA
FBgn0013686	mt:lrRNA	mitochondrion_genome	12735	14058	-	1324	0	0	0	0	NA	NA	NA	NA	0	0	NA	NA	NA	NA	0	0	NA	NA	NA	NA
FBgn0013688	mt:srRNA	mitochondrion_genome	14131	14916	-	786	0	0	0	0	NA	NA	NA	NA	0	0	NA	NA	NA	NA	0	0	NA	NA	NA	NA
FBgn0013689	mt:tRNA:Ala-TGC	mitochondrion_genome	5983	6047	+	65	0	0	0	0	NA	NA	NA	NA	0	0	NA	NA	NA	NA	0	0	NA	NA	NA	NA
FBgn0013690	mt:tRNA:Cys-GCA	mitochondrion_genome	1322	1383	-	62	0	0	0	0	NA	NA	NA	NA	0	0	NA	NA	NA	NA	0	0	NA	NA	NA	NA
FBgn0013691	mt:tRNA:Asp-GTC	mitochondrion_genome	3840	3906	+	67	0	0	0	0	NA	NA	NA	NA	0	0	NA	NA	NA	NA	0	0	NA	NA	NA	NA
FBgn0013692	mt:tRNA:Glu-TTC	mitochondrion_genome	6259	6325	+	67	0	0	0	0	NA	NA	NA	NA	0	0	NA	NA	NA	NA	0	0	NA	NA	NA	NA
FBgn0013693	mt:tRNA:Phe-GAA	mitochondrion_genome	6344	6408	-	65	0	0	0	0	NA	NA	NA	NA	0	0	NA	NA	NA	NA	0	0	NA	NA	NA	NA
FBgn0013694	mt:tRNA:Gly-TCC	mitochondrion_genome	5543	5607	+	65	0	0	0	0	NA	NA	NA	NA	0	0	NA	NA	NA	NA	0	0	NA	NA	NA	NA
FBgn0013695	mt:tRNA:His-GTG	mitochondrion_genome	8141	8206	-	66	0	0	0	0	NA	NA	NA	NA	0	0	NA	NA	NA	NA	0	0	NA	NA	NA	NA
FBgn0013696	mt:tRNA:Ile-GAT	mitochondrion_genome	1	65	+	65	0	0	0	0	NA	NA	NA	NA	0	0	NA	NA	NA	NA	0	0	NA	NA	NA	NA
FBgn0013697	mt:tRNA:Lys-CTT	mitochondrion_genome	3768	3838	+	71	0	0	0	0	NA	NA	NA	NA	0	0	NA	NA	NA	NA	0	0	NA	NA	NA	NA
FBgn0013698	mt:tRNA:Leu-TAG	mitochondrion_genome	12670	12734	-	65	0	0	0	0	NA	NA	NA	NA	0	0	NA	NA	NA	NA	0	0	NA	NA	NA	NA
FBgn0013699	mt:tRNA:Leu-TAA	mitochondrion_genome	3012	3077	+	66	0	0	0	0	NA	NA	NA	NA	0	0	NA	NA	NA	NA	0	0	NA	NA	NA	NA
FBgn0013700	mt:tRNA:Met-CAT	mitochondrion_genome	171	239	+	69	0	0	0	0	NA	NA	NA	NA	0	0	NA	NA	NA	NA	0	0	NA	NA	NA	NA
FBgn0013701	mt:tRNA:Asn-GTT	mitochondrion_genome	6126	6190	+	65	0	0	0	0	NA	NA	NA	NA	0	0	NA	NA	NA	NA	0	0	NA	NA	NA	NA
FBgn0013702	mt:tRNA:Pro-TGG	mitochondrion_genome	9904	9964	-	61	0	0	0	0	NA	NA	NA	NA	0	0	NA	NA	NA	NA	0	0	NA	NA	NA	NA
FBgn0013703	mt:tRNA:Gln-TTG	mitochondrion_genome	97	165	-	69	0	0	0	0	NA	NA	NA	NA	0	0	NA	NA	NA	NA	0	0	NA	NA	NA	NA
FBgn0013704	mt:tRNA:Arg-TCG	mitochondrion_genome	6062	6125	+	64	0	0	0	0	NA	NA	NA	NA	0	0	NA	NA	NA	NA	0	0	NA	NA	NA	NA
FBgn0013705	mt:tRNA:Ser-GCT	mitochondrion_genome	6191	6258	+	68	0	0	0	0	NA	NA	NA	NA	0	0	NA	NA	NA	NA	0	0	NA	NA	NA	NA
FBgn0013706	mt:tRNA:Ser-TGA	mitochondrion_genome	11638	11703	+	66	0	0	0	0	NA	NA	NA	NA	0	0	NA	NA	NA	NA	0	0	NA	NA	NA	NA
FBgn0013707	mt:tRNA:Thr-TGT	mitochondrion_genome	9838	9903	+	66	0	0	0	0	NA	NA	NA	NA	0	0	NA	NA	NA	NA	0	0	NA	NA	NA	NA
FBgn0013708	mt:tRNA:Val-TAC	mitochondrion_genome	14058	14130	-	73	0	0	0	0	NA	NA	NA	NA	0	0	NA	NA	NA	NA	0	0	NA	NA	NA	NA
FBgn0013709	mt:tRNA:Trp-TCA	mitochondrion_genome	1264	1329	+	66	0	0	0	0	NA	NA	NA	NA	0	0	NA	NA	NA	NA	0	0	NA	NA	NA	NA
FBgn0013710	mt:tRNA:Tyr-GTA	mitochondrion_genome	1403	1468	-	66	0	0	0	0	NA	NA	NA	NA	0	0	NA	NA	NA	NA	0	0	NA	NA	NA	NA
FBgn0013717	not	3L	18618305	18622129	-	2989	298.48	99.8596	196.268	65.6635	-0.592479	0.345373	0.0862581	0.166363	285.083	95.3775	-0.0812907	0.347765	0.815178	0.867263	202.437	67.7275	-0.547298	0.34462	0.112259	0.663727
FBgn0013718	nuf	3L	14190870	14233250	+	5594	386.421	69.0777	646.415	115.555	0.736163	0.241977	0.00234792	0.00842517	1398.83	250.059	1.83907	0.242126	3.06601e-14	4.26557e-13	473.349	84.6173	0.286633	0.242242	0.23671	0.749364
FBgn0013720	pck	X	1470666	1472325	+	1478	250.893	169.752	179.831	121.672	-0.488864	0.181047	0.00692962	0.0211746	194.801	131.801	-0.34395	0.187251	0.066234	0.115096	265.058	179.335	0.06857	0.177394	0.699096	0.935719
FBgn0013725	phyl	2R	14427336	14432337	-	1839	0	0	1.17822	0.640687	2.23005	2.26269	0.324343	NA	2.15413	1.17136	2.90433	2.28077	0.202875	NA	0	0	0	2.45466	1	NA
FBgn0013726	pnut	2R	8237271	8240297	+	3027	4177.54	1380.09	4921.11	1625.74	0.237383	0.309491	0.443076	0.576158	6569.98	2170.46	0.653104	0.309633	0.0349201	0.0666818	3225.08	1065.44	-0.372237	0.309543	0.229155	0.742557
FBgn0013732	sced	2R	6657326	6660624	+	3299	125.477	38.0347	134.929	40.9	0.11047	0.171844	0.520322	0.646087	88.3881	26.7924	-0.46288	0.188373	0.0140003	0.030386	96.5096	29.2542	-0.379126	0.174037	0.0293744	0.475037
FBgn0013733	shot	2R	13864237	13942110	-	30414	5303.5	174.377	4726.73	155.413	-0.166866	0.244358	0.494685	0.623225	5527.16	181.731	0.0588674	0.244603	0.809815	0.863186	4608.87	151.538	-0.203419	0.244325	0.405083	0.834488
FBgn0013746	alien	2L	8993818	8997379	-	3235	632.551	195.534	600.959	185.768	-0.0684292	0.207082	0.741064	0.823435	648.405	200.434	0.0622001	0.209403	0.766439	0.829499	562.747	173.956	-0.162923	0.206857	0.430925	0.846111
FBgn0013749	Arf102F	4	1124167	1125325	+	930	194.726	209.383	295.234	317.455	0.608181	0.235081	0.00967844	0.0280325	392.82	422.387	1.05456	0.237525	9.0041e-06	3.98194e-05	274.493	295.154	0.503218	0.234705	0.0320289	0.479517
FBgn0013750	Arf51F	2R	15322501	15325490	+	2196	972.733	442.957	522.295	237.839	-0.892696	0.217634	4.09896e-05	0.000250164	382.625	174.237	-1.31645	0.222292	3.17727e-09	2.44283e-08	1063.41	484.251	0.133497	0.216199	0.536923	0.888377
FBgn0013751	Awh	3L	3846206	3861692	+	2104	0	0	0	0	0	4.40736	1	NA	0	0	0	4.40736	1	NA	0.464837	0.22093	0.922548	4.36402	0.832576	NA
FBgn0013753	Bgb	3L	1639711	1640952	+	1242	84.0419	67.6666	286.404	230.599	1.71487	0.267236	1.38911e-10	2.41482e-09	379.064	305.205	2.11386	0.269697	4.58037e-15	7.12791e-14	108.992	87.7549	0.320753	0.271588	0.237593	0.749578
FBgn0013755	Bro	3L	1647869	1648612	+	744	0	0	0	0	NA	NA	NA	NA	0	0	NA	NA	NA	NA	0	0	NA	NA	NA	NA
FBgn0013756	Mtor	2R	11852617	11861202	+	7780	4552.07	585.098	1944.85	249.981	-1.2273	0.184365	2.79714e-11	5.44811e-10	850.09	109.266	-2.40853	0.187509	9.1915e-38	8.40883e-36	3735.11	480.092	-0.286197	0.183931	0.119708	0.669389
FBgn0013759	CASK	3R	21783400	21822674	-	8504	1520.64	178.815	1959.45	230.415	0.36285	0.268006	0.175773	0.288035	2356.99	277.163	0.628224	0.268512	0.0193019	0.0400541	1696.36	199.478	0.154681	0.267991	0.563813	0.898013
FBgn0013762	Cdk5	2R	15569528	15571417	-	1604	86.2459	53.7693	117.827	73.458	0.447341	0.302683	0.13943	0.241456	119.076	74.2371	0.522718	0.310075	0.0918385	0.151205	81.2059	50.6271	-0.0901806	0.304409	0.76704	0.95374
FBgn0013763	Idgf6	2R	16691022	16693751	+	1811	2077.6	1147.21	495.514	273.614	-2.06749	0.124549	6.98521e-62	6.3265e-59	658.558	363.643	-1.68797	0.127137	3.15652e-40	3.44441e-38	2672.77	1475.85	0.36433	0.120707	0.002542	0.161973
FBgn0013764	Chi	2R	24031538	24033943	-	2246	411.856	183.373	740.367	329.638	0.852777	0.219001	9.86325e-05	0.000539456	986.76	439.341	1.25101	0.220261	1.34943e-08	9.45227e-08	448.304	199.601	0.12942	0.219666	0.555749	0.896457
FBgn0013765	cnn	2R	13439314	13450475	-	6196	1811.04	292.292	3175.59	512.523	0.807228	0.228038	0.000400307	0.00185262	5466.25	882.223	1.59023	0.228181	3.18834e-12	3.53017e-11	2534.18	409.003	0.48164	0.228059	0.0346941	0.494863
FBgn0013767	Crz	3R	14314854	14315716	+	654	0	0	0	0	NA	NA	NA	NA	0	0	NA	NA	NA	NA	0	0	NA	NA	NA	NA
FBgn0013770	Cp1	2R	13960675	13967981	+	2066	2726.63	1319.76	1376.83	666.424	-0.985318	0.156272	2.8793e-10	4.85596e-09	1527.09	739.151	-0.847753	0.15764	7.54161e-08	4.72041e-07	2668.77	1291.76	-0.0303458	0.155542	0.845317	0.9695
FBgn0013771	Cyp6a9	2R	14879356	14881372	-	1964	13.4104	6.82809	3.34196	1.70161	-2.04888	0.680948	0.00262232	0.00923418	6.20982	3.16182	-1.66481	0.705244	0.0182447	0.0382064	11.1192	5.6615	-0.328323	0.58574	0.57512	0.90181
FBgn0013772	Cyp6a8	2R	14887171	14889010	-	1781	0	0	0.631908	0.354805	1.33795	3.85285	0.728394	NA	0.757681	0.425425	2.04926	3.84088	0.59366	NA	0.207585	0.116555	-0.0224244	3.9161	0.995431	NA
FBgn0013773	Cyp6a22	2R	14871366	14873705	+	2165	9.33568	4.31209	2.98076	1.3768	-1.70339	0.79114	0.0313122	0.0733941	2.34414	1.08274	-1.70829	0.854985	0.0457131	0.0839464	8.14026	3.75993	-0.287114	0.709537	0.685735	0.931258
FBgn0013799	Deaf1	3L	19818174	19830686	+	3698	1176.58	318.166	1464.93	396.141	0.318433	0.328543	0.332432	0.466235	2575.28	696.398	1.12772	0.328744	0.000602721	0.00186118	972.725	263.041	-0.272173	0.328697	0.40765	0.835813
FBgn0013810	Dhc36C	2L	17501401	17525515	+	12202	687.792	56.3671	1281.06	104.988	0.894341	0.548033	0.102698	0.190139	1030.9	84.4861	0.583333	0.548796	0.287813	0.387502	985.862	80.7951	0.516365	0.54807	0.346115	0.814457
FBgn0013811	Dhc62B	3L	1759172	1771758	-	12090	52.0528	4.30544	38.138	3.15451	-0.47923	0.46364	0.301311	0.433515	29.8559	2.46947	-0.742692	0.484183	0.125052	0.195377	37.9061	3.13533	-0.496559	0.461351	0.281786	0.780023
FBgn0013812	Dhc93AB	3R	21024580	21042499	-	14010	0	0	0.483344	0.0344999	1.00037	4.37833	0.819271	NA	0	0	0	4.40736	1	NA	0	0	0	4.40736	1	NA
FBgn0013813	Dhc98D	3R	28486953	28519398	+	15919	0	0	0.230361	0.0144708	0.216774	4.35391	0.960291	NA	0.25256	0.0158653	0.992471	4.33415	0.818878	NA	0.447157	0.0280895	0.872944	4.31412	0.839646	NA
FBgn0013949	Elal	3R	24865350	24867651	+	2135	0	0	0	0	NA	NA	NA	NA	0	0	NA	NA	NA	NA	0	0	NA	NA	NA	NA
FBgn0013953	Esp	3R	24841935	24850412	+	2907	316.531	108.886	769.054	264.552	1.27099	0.295016	1.64593e-05	0.000111248	1274.69	438.489	1.99128	0.29553	1.60589e-11	1.64346e-10	330.606	113.728	0.0532467	0.296183	0.857328	0.972813
FBgn0013954	Fkbp12	2R	19290109	19290962	+	633	6427.71	10154.4	2898.74	4579.36	-1.14818	0.277249	3.4531e-05	0.000213771	2072.31	3273.79	-1.63093	0.278037	4.46762e-09	3.37193e-08	5403.9	8536.96	-0.249491	0.277059	0.367855	0.820131
FBgn0013972	Gycalpha99B	3R	29682503	29685758	+	2354	0.365022	0.155065	0.252983	0.107469	-0.744959	4.38601	0.865129	NA	0	0	-0.913758	4.38601	0.834968	NA	0.223579	0.0949781	-0.984155	4.38601	0.822458	NA
FBgn0013973	Gycbeta100B	3R	31134392	31178278	+	4066	1.46009	0.359097	2.12718	0.523164	0.406488	1.40694	0.772646	0.84537	0.528819	0.130059	-1.02864	1.60904	0.522638	0.621851	0.880006	0.21643	-0.851258	1.49825	0.569921	NA
FBgn0013981	His4r	3R	14625755	14626614	+	796	7837.48	9846.08	4089.32	5137.34	-0.93815	0.327018	0.00412033	0.0135849	5441.46	6836	-0.527881	0.327181	0.106653	0.170878	6470.52	8128.79	-0.276082	0.326921	0.398396	0.831796
FBgn0013983	imd	2R	18409796	18413599	-	1518	62.9349	41.4591	98.8689	65.131	0.617429	0.218743	0.00476319	0.0154072	147.633	97.2548	1.1404	0.222514	2.97445e-07	1.67743e-06	87.8439	57.8682	0.44611	0.218121	0.0408306	0.523553
FBgn0013987	MAPk-Ak2	X	5759908	5764203	-	2198	1005.59	457.504	579.649	263.717	-0.788085	0.146882	8.0759e-08	8.82309e-07	409.354	186.239	-1.27466	0.152786	7.25619e-17	1.43492e-15	995.77	453.035	-0.0070181	0.145215	0.961454	0.993683
FBgn0013995	Calx	3R	20978183	21015613	+	8959	0	0	0	0	0	4.40736	1	NA	0.25256	0.0281907	0.992539	4.38784	0.821044	NA	0	0	0	4.40736	1	NA
FBgn0013997	Nrx-IV	3L	12146519	12156990	+	5137	841.831	163.876	842.337	163.974	-0.00359255	0.288903	0.990078	0.994685	933.33	181.688	0.150497	0.290143	0.60397	0.69445	964.324	187.721	0.191275	0.288601	0.50748	0.877279
FBgn0014000	Hf	2L	19966727	19967685	-	896	0	0	0	0	0	4.40736	1	NA	0.25256	0.281875	0.992539	4.38784	0.821044	NA	0	0	0	4.40736	1	NA
FBgn0014006	Ask1	3R	19879719	19886030	+	5168	310.419	60.0656	498.676	96.4931	0.676271	0.113929	2.92233e-09	4.27586e-08	568.745	110.051	0.867984	0.117209	1.30747e-13	1.69896e-12	281.203	54.4124	-0.151047	0.116317	0.194085	0.722424
FBgn0014007	Ptp69D	3L	12734945	12741568	+	5168	449.702	87.0167	673.884	130.395	0.576629	0.356934	0.106201	0.194828	676.974	130.993	0.58985	0.35844	0.0998461	0.162004	504.448	97.61	0.158466	0.357077	0.657197	0.922433
FBgn0014009	Rab2	2R	6696739	6699469	+	1712	1651.94	964.915	1952.31	1140.37	0.244249	0.143057	0.0877554	0.168712	2616.28	1528.2	0.671833	0.143762	2.96511e-06	1.42846e-05	1622.43	947.68	-0.0225006	0.143069	0.875032	0.976357
FBgn0014010	Rab5	2L	2359142	2365273	-	3146	4615.24	1467.02	5776.16	1836.03	0.324595	0.207972	0.118578	0.212919	8106.47	2576.75	0.811785	0.20813	9.60467e-05	0.000348516	3970.78	1262.17	-0.216048	0.208023	0.299002	0.795304
FBgn0014011	Rac2	3L	7432762	7435190	-	2429	1643.19	676.486	2973.53	1224.18	0.857009	0.345779	0.013194	0.0362775	6754.66	2780.84	2.03892	0.345791	3.71561e-09	2.83507e-08	1452.62	598.03	-0.176472	0.345974	0.61	0.910185
FBgn0014018	Rel	3R	9044183	9047977	-	3499	656.896	187.738	639.05	182.638	-0.0434011	0.127725	0.734007	0.818203	619.791	177.134	-0.110601	0.131549	0.400485	0.504828	522.234	149.252	-0.334772	0.127831	0.00882235	0.295291
FBgn0014019	Rh5	2L	12008153	12009832	+	1572	0.730044	0.464405	0	0	-2.48214	4.3686	0.569915	NA	0	0	-1.68915	4.3686	0.699011	NA	0.447157	0.284451	-0.864186	4.32894	0.84177	NA
FBgn0014020	Rho1	2R	16102687	16107229	+	2385	21887.4	9177.11	21345.9	8950.07	-0.0358643	0.214367	0.867131	0.91438	19760.6	8285.36	-0.147387	0.214462	0.491932	0.592162	16883.1	7078.86	-0.374231	0.214371	0.0808594	0.62282
FBgn0014022	Rlb1	3R	9513327	9514827	+	1444	767.003	531.166	339.567	235.157	-1.17153	0.463393	0.0114662	0.0322781	347.223	240.459	-1.15328	0.46567	0.0132641	0.0290596	394.483	273.188	-0.954868	0.462907	0.039135	0.513663
FBgn0014023	mRpL47	3R	9514822	9515908	-	905	116.381	128.598	70.7812	78.2113	-0.693093	0.242125	0.00420258	0.0138309	76.5873	84.6269	-0.614004	0.253346	0.0153686	0.0329609	79.9238	88.3136	-0.512133	0.237968	0.0313886	0.477353
FBgn0014024	Rnp4F	X	5318928	5322696	-	3323	1126.1	338.882	2198.73	661.67	0.970711	0.155836	4.6926e-10	7.71341e-09	2091.75	629.475	0.902442	0.156973	8.97598e-09	6.4367e-08	1171.37	352.503	0.0625679	0.156304	0.688938	0.931728
FBgn0014026	RpL7A	X	6530897	6533348	-	1315	3320.11	2524.8	1085.09	825.164	-1.61267	0.439064	0.000239735	0.00118455	1745.49	1327.37	-0.931693	0.439341	0.0339505	0.0650771	2073.22	1576.59	-0.67854	0.438738	0.121966	0.670486
FBgn0014028	SdhB	2R	6807626	6809172	+	1219	676.806	555.214	538.414	441.685	-0.327543	0.211981	0.12231	0.218006	543.245	445.648	-0.284831	0.214783	0.184796	0.270738	627.563	514.818	-0.106432	0.211306	0.614482	0.912367
FBgn0014029	44441	3R	20586129	20588356	-	1688	818.002	484.598	1816.94	1076.39	1.15357	0.203656	1.47611e-08	1.91535e-07	1981.95	1174.14	1.28769	0.204495	3.03534e-10	2.65358e-09	772.092	457.4	-0.0810472	0.204389	0.691711	0.933329
FBgn0014031	Spat	X	6528948	6530726	+	1410	10.9741	7.78307	1.62122	1.1498	-2.73671	0.858574	0.00143505	0.00558139	1.91011	1.35469	-2.10534	0.856116	0.0139258	0.0302678	4.88255	3.4628	-1.11187	0.697963	0.111155	0.662571
FBgn0014032	Sptr	X	8463296	8464438	-	1143	41.4997	36.3077	28.1756	24.6506	-0.537042	0.326711	0.100221	0.186688	26.3997	23.0969	-0.45392	0.344071	0.187081	0.273599	37.5899	32.8871	-0.123873	0.315631	0.694717	0.934441
FBgn0014033	Sr-CI	2L	4121702	4124153	+	2202	3.89148	1.76725	16.8233	7.63999	2.16548	0.656259	0.000967736	0.00400269	64.9044	29.4752	4.02289	0.645726	4.66378e-10	3.98113e-09	5.6703	2.57507	0.567831	0.69357	0.412953	0.837788
FBgn0014037	Su(Tpl)	3L	19889120	19909410	-	6626	15140.9	2285.08	9805.79	1479.9	-0.626615	0.504212	0.213956	0.335317	15848.4	2391.85	0.0654697	0.504238	0.896694	0.927201	7634.01	1152.13	-0.987806	0.504216	0.0501021	0.553148
FBgn0014073	Tie	3L	4510698	4532145	-	5236	12.2282	2.33541	604.831	115.514	5.59571	0.320432	2.73975e-68	4.13565e-65	1988.01	379.682	7.31159	0.32001	1.52975e-115	6.92746e-112	12.0341	2.29833	-0.0731442	0.375354	0.845497	0.9695
FBgn0014075	Uggt	3L	18872747	18878245	+	5316	572.378	107.671	222.842	41.9191	-1.37156	0.1801	2.62571e-14	7.87452e-13	216.041	40.6398	-1.4266	0.18716	2.49064e-14	3.5082e-13	549.319	103.333	-0.0688441	0.175504	0.694862	0.934441
FBgn0014076	Vm32E	2L	11171167	11171665	-	499	0	0	0	0	NA	NA	NA	NA	0	0	NA	NA	NA	NA	0	0	NA	NA	NA	NA
FBgn0014092	CG4278	2L	16327069	16328131	+	1063	151.056	142.103	114.904	108.094	-0.374459	0.225291	0.0964905	0.181327	124.09	116.736	-0.236487	0.233123	0.310377	0.412364	122.638	115.37	-0.279321	0.223034	0.210435	0.729932
FBgn0014127	barr	2L	20058163	20061370	-	2908	621.898	213.858	1226.08	421.623	0.971056	0.169265	9.64275e-09	1.30936e-07	1283.18	441.258	1.03123	0.170829	1.57372e-09	1.26134e-08	764.641	262.944	0.290584	0.16973	0.0868903	0.63557
FBgn0014133	bif	X	11678970	11694740	+	8842	1555.69	175.943	3066.04	346.759	0.974746	0.17326	1.84533e-08	2.34407e-07	3691.1	417.451	1.24159	0.173753	8.95387e-13	1.06007e-11	1730.3	195.692	0.149231	0.173516	0.389766	0.827139
FBgn0014135	bnl	3R	19794073	19836817	-	4559	1521.42	333.717	929.148	203.805	-0.710724	0.362918	0.0501876	0.107306	1427.55	313.128	-0.100515	0.363365	0.782069	0.841635	1507.8	330.731	-0.0123114	0.362522	0.972909	0.997415
FBgn0014141	cher	3R	17091533	17125389	-	9428	1253.64	132.969	993.664	105.395	-0.338873	0.259563	0.191705	0.307631	824.523	87.4548	-0.602166	0.261457	0.0212724	0.0436188	1589.24	168.566	0.338426	0.259053	0.191419	0.719614
FBgn0014143	croc	3L	21474133	21476479	-	2347	0	0	0.230361	0.0981513	0.2168	4.40736	0.960767	NA	0	0	0	4.40736	1	NA	0	0	0	4.40736	1	NA
FBgn0014163	fax	3L	16402796	16411828	-	4167	1096.08	263.038	5095.8	1222.9	2.21868	0.514029	1.587e-05	0.000107586	14004	3360.69	3.67655	0.514015	8.51446e-13	1.00936e-11	1242.48	298.171	0.182608	0.514288	0.722538	0.94365
FBgn0014179	gcm	2L	9579498	9581745	-	2173	0.365022	0.167981	1.76978	0.814442	1.83039	1.66633	0.272005	0.401818	5.41329	2.49116	3.37865	1.63311	0.0385609	0.0725933	0.207585	0.095529	-0.984188	1.95925	0.615435	0.91241
FBgn0014184	Oda	2R	12166295	12174264	-	2445	3857.43	1577.68	4399.23	1799.28	0.188587	0.310012	0.542973	0.666176	4782.52	1956.04	0.308816	0.310252	0.319556	0.421836	5872.73	2401.93	0.605334	0.309937	0.0508091	0.555957
FBgn0014189	Hel25E	2L	5539326	5542314	-	2460	1650.01	670.736	1055.04	428.877	-0.647367	0.219147	0.00313647	0.0107318	607.028	246.759	-1.42547	0.22255	1.50211e-10	1.37005e-09	1846.16	750.47	0.160586	0.218523	0.462419	0.853554
FBgn0014269	prod	2R	18969404	18971133	-	1597	486.773	304.805	654.521	409.844	0.42588	0.211312	0.0438617	0.096351	710.793	445.08	0.567676	0.213395	0.00780913	0.0183898	577.191	361.422	0.244223	0.211221	0.247582	0.755767
FBgn0014340	mof	X	5873840	5876853	-	3014	455.149	151.012	661.794	219.573	0.539252	0.153074	0.000426985	0.00196305	615.232	204.125	0.465535	0.156437	0.00292166	0.00770124	399.942	132.695	-0.187014	0.154145	0.22504	0.736939
FBgn0014342	mia	3R	5548115	5551168	-	2590	43.4631	16.7811	33.6094	12.9766	-0.374371	0.33984	0.270633	0.400313	26.4063	10.1955	-0.628457	0.36446	0.0846447	0.141627	44.3832	17.1364	0.0444867	0.330722	0.892996	0.980439
FBgn0014343	mirr	3L	12693639	12710249	+	3892	0.328379	0.0843729	1.42741	0.366755	1.64202	1.7139	0.338032	0.471443	4.30825	1.10695	2.91809	1.68975	0.0841785	0.141003	0.223579	0.0574457	-0.984187	1.98849	0.620641	0.914696
FBgn0014366	noi	3R	5589601	5591459	-	1859	453.681	244.046	253.27	136.24	-0.831251	0.258646	0.00130964	0.00516388	164.048	88.2453	-1.43042	0.267654	9.07744e-08	5.61957e-07	334.235	179.793	-0.429382	0.257107	0.0949084	0.641119
FBgn0014368	nol	3L	11130835	11131402	+	568	1.41653	2.49389	0.252983	0.445393	-2.23144	1.94381	0.25098	NA	0	0	-2.40024	1.94381	0.2169	NA	1.50276	2.6457	0.188169	1.64249	0.908791	NA
FBgn0014380	RhoL	3R	9497101	9502581	-	1412	175.065	123.984	235.17	166.551	0.403966	0.314243	0.198611	0.316359	331.353	234.669	0.908167	0.316455	0.00410707	0.0103962	242.674	171.866	0.450781	0.313549	0.150526	0.69272
FBgn0014388	sty	3L	3401153	3424935	-	5438	7631.9	1403.44	9563.74	1758.69	0.325679	0.412059	0.429311	0.563191	17419.2	3203.24	1.19004	0.412081	0.00387858	0.00988952	6128.43	1126.96	-0.316376	0.412081	0.442634	0.85042
FBgn0014391	sun	X	15847859	15849258	-	450	477.292	1060.65	231.209	513.797	-1.03847	0.457105	0.0230964	0.0574367	295.556	656.791	-0.692337	0.459251	0.131673	0.204242	330.446	734.325	-0.523244	0.456025	0.251216	0.75983
FBgn0014395	tilB	X	22449737	22451463	+	1358	9.98552	7.35311	1.91455	1.40983	-2.5106	0.805947	0.00183883	0.00683954	0.528819	0.38941	-3.75367	1.09671	0.000620086	0.00190636	10.464	7.70542	-0.0227322	0.631882	0.971302	0.996721
FBgn0014396	tim	2L	3493986	3508119	-	6181	0.328379	0.0531272	1.42741	0.230935	1.64599	1.67396	0.325464	0.45879	3.21176	0.519619	2.66856	1.66192	0.108336	0.173204	0.931359	0.150681	0.93916	1.71551	0.584068	NA
FBgn0014411	Vps26	X	1873853	1876474	+	2543	869.839	342.052	677.727	266.507	-0.353468	0.168105	0.0354956	0.0811586	645.054	253.659	-0.445331	0.171286	0.00932435	0.0213961	848.268	333.57	-0.0294789	0.167308	0.86014	0.973543
FBgn0014417	CG13397	2L	8408888	8411868	-	2902	222.497	76.6702	61.3384	21.1366	-1.83702	0.237291	9.81591e-15	3.13038e-13	31.2344	10.7631	-2.89982	0.278089	1.85394e-25	7.26887e-24	174.829	60.2442	-0.33335	0.223663	0.136117	0.681736
FBgn0014427	CG11899	3R	29200454	29201770	+	1176	15.5763	13.2451	12.1683	10.3472	-0.47346	0.618419	0.443915	0.577001	12.3268	10.482	-0.427972	0.646583	0.508037	0.607491	21.3789	18.1794	0.366515	0.598336	0.540169	0.890135
FBgn0014454	Acp1	2L	7740562	7741537	-	858	0	0	0	0	NA	NA	NA	NA	0	0	NA	NA	NA	NA	0	0	NA	NA	NA	NA
FBgn0014455	Ahcy	X	15450261	15453167	+	2119	702.292	331.426	195.855	92.4279	-1.83757	0.417923	1.09803e-05	7.7999e-05	188.332	88.8778	-1.91897	0.422612	5.60569e-06	2.5877e-05	432.322	204.022	-0.694903	0.415823	0.0946919	0.641119
FBgn0014464	Cp7Fa	X	8470888	8473087	+	1183	0	0	0.568937	0.480927	1.19413	3.05528	0.695913	NA	1.37275	1.16039	1.31552	3.06614	0.667887	NA	0.207585	0.175473	-0.022405	3.11992	0.99427	NA
FBgn0014465	Cp7Fb	X	8473837	8476071	+	2093	0.328379	0.156894	1.68039	0.802864	1.84481	2.18297	0.398061	NA	0.78138	0.37333	1.1475	2.27793	0.61444	NA	0	0	-1.94598	2.41442	0.420253	NA
FBgn0014466	Cp7Fc	X	8477117	8478320	+	1132	0.365022	0.322458	1.70681	1.50778	1.79554	1.64404	0.274767	0.404579	5.45214	4.81637	3.12993	1.61788	0.0530411	0.0953161	1.31117	1.15828	1.47595	1.6497	0.370959	0.821574
FBgn0014469	Cyp4e2	2R	8444560	8447164	+	1897	793.16	418.113	210.21	110.812	-1.92478	0.176276	9.34376e-28	1.09904e-25	155.323	81.878	-2.37437	0.187576	1.00837e-36	8.69791e-35	820.998	432.788	0.0448899	0.170305	0.7921	0.956959
FBgn0014848	Eig71Eh	3L	15658936	15659441	-	443	0	0	0	0	NA	NA	NA	NA	0	0	NA	NA	NA	NA	0	0	NA	NA	NA	NA
FBgn0014849	Eig71Ei	3L	15659707	15660351	+	530	0	0	0	0	NA	NA	NA	NA	0	0	NA	NA	NA	NA	0	0	NA	NA	NA	NA
FBgn0014850	Eig71Ej	3L	15660549	15661015	-	403	0	0	0	0	NA	NA	NA	NA	0	0	NA	NA	NA	NA	0	0	NA	NA	NA	NA
FBgn0014851	Eig71Ek	3L	15661248	15661809	+	445	0	0	0	0	NA	NA	NA	NA	0	0	NA	NA	NA	NA	0	0	NA	NA	NA	NA
FBgn0014857	His3.3A	2L	5055058	5056149	+	1002	914.826	913	674.213	672.868	-0.4402	0.171449	0.0102426	0.0294498	658.043	656.73	-0.44622	0.174307	0.010468	0.023671	911.176	909.357	-0.00511578	0.170542	0.976069	0.998278
FBgn0014859	Hr38	2L	20683462	20714588	-	7704	68.122	8.84242	123.436	16.0223	0.855905	0.272731	0.00169944	0.00640525	162.794	21.1312	1.23432	0.277483	8.6559e-06	3.84108e-05	72.3415	9.39012	0.0776692	0.276349	0.778669	0.955003
FBgn0014861	Mcm2	3R	8264970	8267924	+	2898	225.856	77.9351	295.302	101.899	0.39797	0.186557	0.0329051	0.0765728	257.552	88.8724	0.159455	0.193314	0.409457	0.513565	175.676	60.6196	-0.349906	0.188632	0.0636011	0.581591
FBgn0014863	Mlp84B	3R	7112850	7117732	-	3136	2.81025	0.896125	1.05228	0.335549	-1.5676	1.21873	0.198353	0.316227	0.552518	0.176186	-1.97268	1.34742	0.143182	0.219239	3.15284	1.00537	0.0152986	1.05405	0.98842	0.999184
FBgn0014865	Mtk	2R	15408846	15409113	+	268	0	0	0	0	NA	NA	NA	NA	0	0	NA	NA	NA	NA	0	0	NA	NA	NA	NA
FBgn0014868	Ost48	X	9156929	9158515	-	1513	528.231	349.128	87.0182	57.5137	-2.59612	0.259666	1.55635e-23	1.36853e-21	133.596	88.2986	-2.07967	0.264625	3.87482e-15	6.1461e-14	482.514	318.912	-0.125238	0.249083	0.615108	0.912367
FBgn0014869	Pglym78	3R	29148248	29149901	+	1136	209.691	184.587	87.0906	76.6643	-1.257	0.187107	1.84168e-11	3.69029e-10	65.3466	57.5234	-1.53775	0.203715	4.40128e-14	5.96742e-13	161.244	141.94	-0.365469	0.177654	0.0396674	0.51857
FBgn0014870	Psi	2R	16861321	16867714	-	5690	1741.74	306.105	1372.4	241.196	-0.344426	0.204722	0.0924893	0.175613	1522.53	267.579	-0.207107	0.205809	0.314269	0.416252	1659.1	291.582	-0.0710025	0.204422	0.728341	0.945347
FBgn0014877	Roe1	2R	13554077	13555606	+	1065	303.531	285.006	303.033	284.538	-0.00303679	0.177188	0.986326	0.992132	255.57	239.972	-0.213195	0.183838	0.246176	0.341966	293.294	275.394	-0.0461509	0.176507	0.793731	0.957867
FBgn0014879	Set	3R	15263552	15265253	+	1169	2676.12	2289.24	2038.74	1744	-0.390536	0.226711	0.084958	0.164482	1353.86	1158.13	-0.980381	0.228202	1.73818e-05	7.3086e-05	2237.57	1914.09	-0.256056	0.226571	0.25842	0.76586
FBgn0014903	CG14630	X	1031496	1033165	+	1358	0	0	0	0	NA	NA	NA	NA	0	0	NA	NA	NA	NA	0	0	NA	NA	NA	NA
FBgn0014906	Hydr2	2L	3163645	3169462	+	2857	688.809	241.095	580.449	203.167	-0.25446	0.174492	0.144761	0.248645	624.095	218.444	-0.14286	0.177268	0.420302	0.524769	811.954	284.198	0.229952	0.1734	0.184795	0.714557
FBgn0014930	CG2846	3R	7912017	7913290	-	1210	172.523	142.581	81.5943	67.4333	-1.05884	0.313162	0.000721936	0.00310769	60.0992	49.6688	-1.40135	0.328626	2.00551e-05	8.31679e-05	149.57	123.612	-0.184743	0.307262	0.547671	0.892763
FBgn0014931	CG2678	3R	7913851	7916550	+	2003	46.8181	23.374	33.6878	16.8187	-0.503829	0.337828	0.135863	0.236864	43.3844	21.6597	-0.338184	0.351994	0.33667	0.440129	49.9209	24.9231	0.070259	0.32714	0.829949	0.964108
FBgn0014949	btn	3R	22586149	22586625	-	477	0.723128	1.51599	0.966688	2.0266	1.07491	1.86599	0.564581	NA	0.276259	0.579159	0.0579829	2.03149	0.97723	NA	1.12126	2.35066	1.23471	1.82999	0.49986	NA
FBgn0015000	betaggt-I	2L	4945579	4948324	+	1784	436.827	244.858	717.483	402.177	0.714761	0.225312	0.00151229	0.00583587	650.871	364.838	0.598327	0.227785	0.00862138	0.020001	500.954	280.804	0.196075	0.225664	0.384914	0.825217
FBgn0015001	iotaTry	2R	11356720	11357537	+	818	0	0	0	0	NA	NA	NA	NA	0	0	NA	NA	NA	NA	0	0	NA	NA	NA	NA
FBgn0015008	Actn3	3R	16975885	16977795	-	1856	0.365022	0.196671	0	0	-1.70674	4.40736	0.698573	NA	0	0	-0.913748	4.40736	0.835757	NA	0.241258	0.129988	-0.984146	4.40736	0.823305	NA
FBgn0015010	Ag5r	X	14784664	14786551	-	1760	0	0	0.713705	0.405514	1.5712	3.18101	0.621355	NA	0	0	0	3.27787	1	NA	0.431163	0.244979	0.831243	3.2295	0.796877	NA
FBgn0015011	AhcyL2	3R	16978439	16982158	-	1969	27.6842	14.06	13.7479	6.98216	-0.984806	0.372138	0.00813665	0.0242536	10.03	5.09398	-1.58846	0.434521	0.000256515	0.000856341	33.8855	17.2095	0.294525	0.336029	0.380764	0.82364
FBgn0015019	CCT3	3R	16647605	16649978	+	2165	3254.6	1503.28	1591.15	734.94	-1.03077	0.228495	6.44925e-06	4.85947e-05	1431.99	661.426	-1.18918	0.229708	2.25571e-07	1.30127e-06	2229.85	1029.96	-0.543798	0.228191	0.0171681	0.382735
FBgn0015024	CkIalpha	X	12653626	12657834	+	3369	11953.1	3547.97	11177.6	3317.78	-0.0965736	0.443849	0.827755	0.887426	15009.2	4455.08	0.328082	0.443892	0.459845	0.562737	7596.16	2254.72	-0.653829	0.443862	0.140739	0.68625
FBgn0015025	CkIIalpha-i1	3L	15816979	15818621	+	1585	71.701	45.2372	64.5722	40.7396	-0.116265	0.324778	0.720357	0.80726	72.4022	45.6796	-0.036019	0.335756	0.914569	0.939914	48.4199	30.5488	-0.531155	0.326412	0.103684	0.652429
FBgn0015031	cype	2L	5327227	5327969	+	522	169.837	325.358	168.164	322.153	0.00461355	0.388805	0.990533	0.994706	156.352	299.524	-0.0633004	0.394402	0.872489	0.911645	121.624	232.996	-0.462316	0.389497	0.235245	0.748291
FBgn0015032	Cyp4c3	3R	30894038	30900688	+	1906	0	0	0	0	0	4.40736	1	NA	0.528819	0.27745	1.67843	4.35409	0.69988	NA	0	0	0	4.40736	1	NA
FBgn0015033	Cyp4d8	3L	7493557	7496197	-	1573	0	0	0.252983	0.160828	0.216791	4.40736	0.960769	NA	0	0	0	4.40736	1	NA	0.241258	0.153375	-0.022405	4.40736	0.995944	NA
FBgn0015034	Cyp4e1	2R	8447451	8449745	+	1772	11.9275	6.73108	0	0	-6.41974	1.4054	4.92622e-06	3.82977e-05	0	0	-5.62675	1.4054	6.23707e-05	0.000235078	13.4092	7.56727	0.101142	0.788943	0.897991	0.981141
FBgn0015035	Cyp4e3	2L	9747839	9750071	-	1805	0.328379	0.181928	0.460722	0.255248	0.00011478	3.1513	0.999971	NA	0	0	-0.913781	3.1871	0.774333	NA	0.706095	0.391188	0.558556	3.07174	0.855711	NA
FBgn0015036	Cyp4ae1	X	2179007	2180998	+	1822	0	0	0	0	0	4.40736	1	NA	0	0	0	4.40736	1	NA	0.431163	0.236643	0.826131	4.37198	0.850124	NA
FBgn0015037	Cyp4p1	2R	9240041	9242139	+	1680	8.19155	4.87592	2.7504	1.63714	-1.55835	0.798326	0.0509351	0.108725	2.13898	1.2732	-1.5864	0.866817	0.0672287	0.116601	3.76128	2.23886	-1.13723	0.752284	0.13061	0.673164
FBgn0015038	Cyp9b1	2R	7127838	7129808	-	1752	0	0	0	0	0	4.40736	1	NA	0	0	0	4.40736	1	NA	0.448843	0.256189	0.876976	4.36772	0.840866	NA
FBgn0015039	Cyp9b2	2R	7130277	7132139	-	1667	0	0	0	0	NA	NA	NA	NA	0	0	NA	NA	NA	NA	0	0	NA	NA	NA	NA
FBgn0015040	Cyp9c1	2R	24631063	24632923	+	1743	1259.29	722.486	766.813	439.938	-0.716676	0.127565	1.93053e-08	2.4386e-07	729.199	418.359	-0.787074	0.130926	1.83731e-09	1.45841e-08	1524.17	874.453	0.276236	0.125921	0.0282548	0.465942
FBgn0015075	Ddx1	3L	22263369	22266017	+	2470	355.282	143.839	375.956	152.209	0.0890391	0.137911	0.518521	0.644316	428.848	173.623	0.282609	0.141768	0.0462107	0.0846542	314.965	127.516	-0.162956	0.137934	0.23744	0.749578
FBgn0015218	eIF4E1	3L	9399618	9402460	-	2235	4668.78	2088.94	2995.72	1340.37	-0.638652	0.173811	0.000238397	0.00117869	3680.67	1646.83	-0.342865	0.174293	0.0491635	0.0893158	3963.29	1773.28	-0.234831	0.173617	0.176189	0.707755
FBgn0015221	Fer2LCH	3R	30387804	30390584	+	1648	17443.3	10584.5	5785.07	3510.36	-1.59245	0.244156	6.92544e-11	1.26205e-09	5209.75	3161.25	-1.7431	0.244475	1.00396e-12	1.18089e-11	19270.5	11693.3	0.143479	0.244009	0.556528	0.896503
FBgn0015222	Fer1HCH	3R	30385573	30388178	-	2376	342.609	144.196	181.13	76.2332	-0.929957	0.24838	0.000181049	0.000927468	184.209	77.529	-0.942667	0.25506	0.000219139	0.000740574	354.355	149.139	0.0374051	0.244855	0.878584	0.977242
FBgn0015229	glec	3R	21850694	21856266	-	2050	4248.15	2072.27	2448.25	1194.27	-0.794757	0.549079	0.147775	0.252767	5659.42	2760.69	0.412596	0.549085	0.452397	0.556027	2015.33	983.089	-1.07551	0.549084	0.050143	0.553148
FBgn0015230	Glut3	3R	16788311	16790021	+	1711	0	0	0	0	NA	NA	NA	NA	0	0	NA	NA	NA	NA	0	0	NA	NA	NA	NA
FBgn0015239	Hr78	3L	21494019	21497494	-	2420	300.552	124.195	489.338	202.206	0.707809	0.177985	6.98544e-05	0.000399919	636.986	263.217	1.0569	0.180236	4.51903e-09	3.39776e-08	251.181	103.794	-0.254262	0.18001	0.157806	0.695771
FBgn0015240	Hr96	3R	25025235	25029351	+	2834	117.363	41.4125	130.438	46.0261	0.142393	0.195942	0.467404	0.59904	97.6395	34.4529	-0.189396	0.208741	0.364237	0.468061	119.025	41.9989	0.00690726	0.195158	0.971766	0.996915
FBgn0015245	Hsp60A	X	11108482	11112308	+	2480	3504.69	1413.18	2368.53	955.052	-0.566446	0.121285	3.0065e-06	2.45979e-05	1491.75	601.513	-1.23065	0.123679	2.51324e-23	8.33787e-22	3589.41	1447.34	0.0338664	0.120855	0.779306	0.955063
FBgn0015247	Diap2	2R	15932170	15934825	-	2134	237.362	111.229	181.484	85.044	-0.384594	0.181654	0.0342451	0.0790413	156.44	73.3084	-0.553159	0.1907	0.00372359	0.00954289	244.39	114.522	0.0423064	0.178513	0.812662	0.961881
FBgn0015268	Nap1	2R	23905175	23907294	-	1582	5690.24	3596.86	2771.15	1751.68	-1.03733	0.203982	3.66809e-07	3.61895e-06	2063.7	1304.49	-1.46338	0.205025	9.49882e-13	1.12165e-11	5253.8	3320.99	-0.114191	0.203709	0.575097	0.90181
FBgn0015269	Nf1	3R	25983013	25995737	+	10064	442.789	43.9974	652.806	64.8654	0.554467	0.440222	0.207843	0.328294	482.119	47.9053	0.127934	0.44228	0.772382	0.833985	479.983	47.6931	0.110575	0.440361	0.801736	0.960008
FBgn0015270	Orc2	3R	13964885	13967075	+	1995	86.6904	43.4538	113.032	56.6576	0.388543	0.226199	0.0858502	0.165717	73.3849	36.7844	-0.219313	0.243674	0.368108	0.471563	85.0091	42.6111	-0.026133	0.227543	0.908565	0.983255
FBgn0015271	Orc5	2L	13829837	13831576	+	1687	95.5006	56.6097	88.2797	52.3294	-0.114768	0.19003	0.545879	0.668925	84.8891	50.3196	-0.214316	0.202412	0.289687	0.389568	81.7015	48.4301	-0.226051	0.188608	0.230714	0.74302
FBgn0015277	Pi3K59F	2R	23560492	23564045	+	3164	161.607	51.0769	332.656	105.138	1.03992	0.14185	2.28259e-13	5.96751e-12	433.561	137.029	1.42705	0.144686	6.01514e-23	1.94568e-21	193.264	61.0822	0.258134	0.144462	0.0739595	0.615461
FBgn0015278	Pi3K68D	3L	11774650	11790013	-	7799	488.418	62.6257	595.153	76.3115	0.276224	0.227175	0.224019	0.347124	707.958	90.7755	0.515735	0.229056	0.0243496	0.0488989	514.323	65.9473	0.0650301	0.227122	0.774631	0.954154
FBgn0015279	Pi3K92E	3R	20628972	20634732	-	4839	648.804	134.078	1617.96	334.359	1.31294	0.259333	4.13234e-07	4.03304e-06	1970.51	407.214	1.60153	0.259941	7.22271e-10	6.05145e-09	765.454	158.184	0.232951	0.259847	0.369988	0.821574
FBgn0015282	Rpt2	3R	23929873	23931558	-	1625	1491.18	917.647	1914.37	1178.07	0.364231	0.217861	0.094554	0.178598	2580.58	1588.05	0.798313	0.21835	0.000256063	0.000855465	1444.84	889.133	-0.0415944	0.217938	0.848639	0.970041
FBgn0015283	Rpn10	3L	21537000	21538582	+	1422	907.551	638.221	1401.37	985.494	0.627264	0.156945	6.42313e-05	0.000370773	1793.46	1261.22	0.99413	0.157918	3.06926e-10	2.67548e-09	964.653	678.377	0.0890483	0.157225	0.571139	0.900466
FBgn0015286	Rala	X	3704610	3719635	-	2751	1599.27	581.341	2298.29	835.437	0.523595	0.3061	0.0871665	0.167793	3167.82	1151.52	0.981729	0.306384	0.00135417	0.00385562	1456.64	529.496	-0.134274	0.306229	0.661041	0.923741
FBgn0015288	RpL22	X	762560	765130	-	1100	1774.56	1613.24	476.026	432.751	-1.8976	0.345357	3.91558e-08	4.62366e-07	697.298	633.908	-1.36491	0.346385	8.13303e-05	0.000300534	1380.1	1254.63	-0.361733	0.344158	0.293228	0.789018
FBgn0015295	Shark	2R	16199426	16202884	-	3176	134.26	42.2733	338.618	106.618	1.30472	0.164661	2.30616e-15	7.85221e-14	337.656	106.315	1.31763	0.169367	7.26593e-15	1.10974e-13	141.423	44.5286	0.0456084	0.169626	0.788025	0.956019
FBgn0015296	Shc	3L	9427010	9428671	+	1600	226.977	141.86	489.602	306.001	1.11437	0.203532	4.37109e-08	5.11485e-07	516.872	323.045	1.2211	0.206404	3.29761e-09	2.52921e-08	215.926	134.954	-0.0665962	0.206042	0.746531	0.947977
FBgn0015298	Srp19	3L	7347310	7348034	-	653	119.228	182.585	78.5217	120.248	-0.579693	0.349072	0.0967803	0.181704	108.822	166.649	-0.139461	0.354637	0.694136	0.772048	88.1608	135.009	-0.408164	0.346513	0.238829	0.750606
FBgn0015299	Ssb-c31a	2L	8211347	8211938	+	536	175.394	327.227	197.123	367.767	0.18359	0.280042	0.512095	0.638565	161.834	301.93	-0.0556725	0.287452	0.84643	0.892238	149.835	279.542	-0.209371	0.280574	0.455532	0.853554
FBgn0015300	Ssl	2R	24499243	24500267	-	908	0	0	0	0	NA	NA	NA	NA	0	0	NA	NA	NA	NA	0	0	NA	NA	NA	NA
FBgn0015316	Try29F	2L	8998537	8999816	+	1280	5.13863	4.01455	3.95125	3.08691	-0.496514	0.777985	0.52334	0.648302	1.81532	1.41822	-1.2041	0.901336	0.18158	0.267149	6.7971	5.31024	0.299802	0.730594	0.681547	0.930913
FBgn0015320	Ubc2	2L	10765010	10768006	-	2252	2899.87	1287.69	3356.61	1490.5	0.213242	0.172342	0.215968	0.337594	4026.64	1788.03	0.474478	0.172799	0.00603577	0.0146518	2588.29	1149.33	-0.161591	0.172385	0.348563	0.814457
FBgn0015321	Ubc4	3L	9698336	9700481	+	1709	894.919	523.651	722.31	422.651	-0.305274	0.39687	0.441772	0.574874	1176.01	688.127	0.392223	0.397308	0.323544	0.425921	662.333	387.556	-0.430222	0.39679	0.278251	0.777794
FBgn0015331	abs	3R	4233047	4235041	+	1995	260.401	130.527	411.136	206.083	0.67205	0.144461	3.28535e-06	2.66626e-05	480.82	241.013	0.86892	0.14796	4.28856e-09	3.2449e-08	220.334	110.443	-0.228273	0.147104	0.120714	0.66959
FBgn0015336	CG15865	X	16660898	16664455	-	3429	0	0	0	0	0	4.40736	1	NA	0.528819	0.15422	1.67842	4.35409	0.699882	NA	0.223579	0.0652023	-0.0224115	4.40736	0.995943	NA
FBgn0015338	CG5861	2L	16305801	16307298	-	1126	396.6	352.22	234.314	208.094	-0.760041	0.153004	6.78351e-07	6.36665e-06	191.528	170.096	-1.07022	0.162506	4.52746e-11	4.39028e-10	405.819	360.408	0.0334618	0.148995	0.822303	0.963555
FBgn0015351	CG14906	3R	16649981	16651157	-	1177	102.532	87.1131	74.0411	62.9066	-0.506075	0.244447	0.0384256	0.0867233	65.4783	55.6315	-0.637816	0.258687	0.0136786	0.0298163	106.956	90.872	0.0337418	0.237931	0.887227	0.979727
FBgn0015359	CG2034	3L	2257456	2258922	+	1284	149.929	116.768	172.15	134.073	0.208235	0.170831	0.222861	0.345684	201.804	157.168	0.497475	0.175774	0.00465204	0.0116263	160.077	124.67	0.103852	0.169962	0.541179	0.890611
FBgn0015360	oxt	3L	2258839	2262664	-	3380	271.152	80.2226	208.289	61.6241	-0.393225	0.229447	0.0865668	0.166887	162.723	48.143	-0.706833	0.238068	0.00298728	0.00784681	320.2	94.7336	0.225694	0.226822	0.319723	0.805768
FBgn0015371	chn	2R	15115236	15144783	+	6256	855.049	136.677	1288.06	205.892	0.58556	0.215362	0.00654883	0.0201538	1013.8	162.052	0.229681	0.217287	0.290494	0.39053	918.27	146.782	0.0972281	0.215542	0.651928	0.922096
FBgn0015372	RabX1	2R	23519839	23523613	-	1648	1258.95	763.927	6425.52	3898.98	2.35516	0.193905	6.02747e-34	1.18676e-31	10015.8	6077.52	2.99678	0.19402	8.06538e-54	2.08709e-51	1380.6	837.744	0.13674	0.194553	0.482153	0.86314
FBgn0015376	cutlet	2L	3707230	3711748	-	3236	108.098	33.4048	61.3303	18.9525	-0.850305	0.320959	0.0080668	0.0240966	37.6452	11.6333	-1.45414	0.345012	2.50047e-05	0.000101282	97.6578	30.1786	-0.174655	0.314243	0.578351	0.90297
FBgn0015379	dod	X	21345358	21346858	+	1021	350.768	343.554	230.952	226.201	-0.588382	0.218546	0.00709705	0.0216133	212.177	207.813	-0.702665	0.225197	0.00180713	0.00499998	300.291	294.114	-0.208736	0.216605	0.33521	0.808142
FBgn0015380	drl	2L	19190342	19208621	+	3104	9.55068	3.0769	64.0886	20.6471	2.86061	0.528891	6.349e-08	7.07293e-07	106.439	34.2909	3.51452	0.532035	3.95327e-11	3.87079e-10	6.36594	2.05088	-0.457318	0.586217	0.435322	0.847451
FBgn0015381	dsf	2L	5925937	5939261	+	3537	0	0	0	0	0	4.40736	1	NA	0.505121	0.142811	1.63683	4.35574	0.707075	NA	0.223579	0.0632113	-0.0224111	4.40736	0.995943	NA
FBgn0015391	glu	2L	16733617	16738388	-	4521	4013.43	887.731	3033.25	670.924	-0.402441	0.161727	0.0128318	0.0354538	1264.93	279.791	-1.66824	0.164217	3.02936e-24	1.08019e-22	3263.73	721.904	-0.296851	0.161603	0.066223	0.592334
FBgn0015396	jumu	3R	10350182	10361612	+	3860	1167.22	302.39	964.468	249.862	-0.275668	0.303128	0.363132	0.498241	1264.48	327.586	0.102841	0.303888	0.735049	0.803832	1155.4	299.327	-0.0152728	0.302845	0.959779	0.993523
FBgn0015399	kek1	2L	12817000	12822787	-	5788	9248.07	1597.8	10607.5	1832.67	0.198032	0.581974	0.733648	0.818004	27170.4	4694.27	1.5547	0.58197	0.00755245	0.0178482	5487.76	948.128	-0.752755	0.582002	0.195876	0.724664
FBgn0015400	kek2	2L	11581937	11626883	+	6939	0	0	1.53563	0.221304	2.66234	1.94787	0.171689	0.283654	4.00829	0.577647	3.81517	1.93898	0.0491121	0.0892473	0.447157	0.0644411	0.873069	2.11617	0.679922	NA
FBgn0015402	ksr	3R	5478390	5483906	-	5517	267.094	48.4128	475.881	86.2573	0.815092	0.224104	0.000275708	0.00134541	487.741	88.4069	0.837371	0.227157	0.000227532	0.000766652	359.194	65.1068	0.408579	0.224405	0.0686488	0.597307
FBgn0015477	Rme-8	2R	9167763	9177261	-	7771	630.493	81.1341	1148.51	147.795	0.859505	0.320375	0.00730069	0.0221192	1178.82	151.695	0.900568	0.321337	0.00506977	0.0125319	728.389	93.7317	0.202254	0.320621	0.528158	0.884487
FBgn0015509	Cul1	2R	7916856	7921579	+	4141	1267.54	306.095	2422.18	584.927	0.929575	0.105238	1.01799e-18	5.52094e-17	2088.67	504.387	0.71233	0.106931	2.7087e-11	2.70184e-10	1254.34	302.907	-0.0200276	0.105915	0.850022	0.970041
FBgn0015513	mbc	3R	23781765	23801634	+	7465	616.129	82.5357	2361.25	316.31	1.93221	0.33972	1.2879e-08	1.69543e-07	4229.55	566.584	2.77304	0.339832	3.34941e-16	6.06712e-15	569.92	76.3456	-0.118593	0.340578	0.727682	0.945347
FBgn0015519	nAChRalpha3	X	8276200	8367169	-	10506	13.5224	1.28711	47.0379	4.47724	1.84137	0.567478	0.00117521	0.00472851	109.031	10.378	2.97906	0.567642	1.53649e-07	9.14325e-07	5.98276	0.569461	-1.12845	0.622795	0.07	0.602743
FBgn0015520	nonA-l	3R	16640205	16643112	+	2908	577.295	198.52	572.338	196.815	-0.00817487	0.43702	0.985076	0.99182	873.032	300.217	0.590683	0.437634	0.177106	0.2618	397.578	136.719	-0.533748	0.437254	0.222206	0.733186
FBgn0015521	RpS21	2L	2856070	2857029	+	842	857.996	1019	315.854	375.123	-1.43742	0.377521	0.000140361	0.000733626	324.536	385.435	-1.41459	0.380431	0.000200493	0.000683685	678.045	805.279	-0.335339	0.376105	0.372602	0.821574
FBgn0015522	olf186-M	2R	17846699	17848444	+	1746	306.64	175.624	228.676	130.971	-0.421896	0.407	0.299923	0.432204	388.825	222.695	0.311716	0.408165	0.445046	0.548728	283.223	162.213	-0.113925	0.406046	0.779038	0.955063
FBgn0015524	otp	2R	20883625	20903414	-	3368	3.19808	0.949549	1.63895	0.486623	-0.92934	1.08978	0.393782	0.528995	7.55886	2.24432	0.902113	1.00927	0.371417	0.474939	4.17476	1.23954	0.463575	0.97724	0.635235	0.918204
FBgn0015527	peng	X	21346503	21349843	-	2367	764.387	322.935	584.61	246.984	-0.382702	0.217005	0.0778051	0.153325	412.757	174.38	-0.858958	0.221448	0.000104961	0.000378286	543.684	229.693	-0.486412	0.216796	0.0248557	0.451386
FBgn0015543	snoRNA:Me28S-A1322	2R	11893123	11893195	+	73	3.8984	53.4027	0.691083	9.4669	-2.42294	1.30588	0.063538	0.129964	0.528819	7.2441	-2.36547	1.35625	0.0811367	0.136743	2.51746	34.4857	-0.694412	1.07912	0.519902	0.88068
FBgn0015544	spag	2R	24159384	24161503	+	1825	677.171	371.052	876.262	480.143	0.378817	0.164267	0.0211048	0.0534078	1126.78	617.412	0.736096	0.165715	8.91463e-06	3.94623e-05	606.973	332.588	-0.150019	0.16468	0.36231	0.818217
FBgn0015546	spel1	2L	14362069	14366840	+	4433	137.107	30.9288	134.095	30.2493	0.00114451	0.18411	0.99504	0.997463	130.551	29.4499	-0.0443913	0.193332	0.818394	0.869567	119.852	27.0362	-0.165323	0.183528	0.367693	0.820131
FBgn0015550	tap	3L	17359682	17361811	+	2130	0	0	0	0	NA	NA	NA	NA	0	0	NA	NA	NA	NA	0	0	NA	NA	NA	NA
FBgn0015553	tos	2L	18679631	18682075	-	2390	240.655	100.693	196.306	82.1365	-0.28662	0.129987	0.027455	0.0660803	127.434	53.3196	-0.924119	0.145301	2.01716e-10	1.80079e-09	211.233	88.3822	-0.180722	0.127653	0.156857	0.694727
FBgn0015558	tty	X	21328613	21339676	-	7616	3.46701	0.455227	4.10091	0.53846	0.0599549	0.781665	0.938861	0.962779	1.3339	0.175144	-1.16995	0.961743	0.2238	0.316366	7.29561	0.957932	0.87901	0.736362	0.232588	0.744593
FBgn0015561	unpg	2R	9195205	9199870	+	1690	0	0	0	0	NA	NA	NA	NA	0	0	NA	NA	NA	NA	0	0	NA	NA	NA	NA
FBgn0015568	alpha-Est1	3R	7545733	7549124	-	2123	5.57002	2.62366	1.28264	0.604165	-2.14185	0.897516	0.0170133	0.0446377	0	0	-4.51045	1.3318	0.00070734	0.00214547	13.6947	6.45065	1.24894	0.648238	0.0540213	0.560841
FBgn0015569	alpha-Est10	3R	7486583	7493845	-	2341	147.634	63.0646	96.3487	41.1571	-0.635133	0.376504	0.0916185	0.174399	110.448	47.1797	-0.410251	0.382883	0.283954	0.383332	209.269	89.3932	0.481676	0.371814	0.195156	0.724028
FBgn0015570	alpha-Est2	3R	7541810	7545230	+	2141	0.693401	0.323868	0	0	-2.4328	4.1818	0.560729	NA	0.25256	0.117964	-0.695428	4.16122	0.867275	NA	0	0	-2.672	4.1818	0.52285	NA
FBgn0015571	alpha-Est3	3R	7538972	7541631	-	1932	72.393	37.4705	67.7567	35.0707	-0.0579202	0.286852	0.839982	0.895658	106.389	55.0669	0.507655	0.291532	0.0816253	0.137387	55.1736	28.5577	-0.35217	0.287346	0.220351	0.732121
FBgn0015572	alpha-Est4	3R	7536687	7538615	-	1749	3.57693	2.04513	6.87393	3.93021	0.80175	0.831753	0.335082	0.46907	7.75083	4.43158	1.22011	0.849442	0.150897	0.229109	5.38106	3.07665	0.433954	0.836051	0.603725	0.907116
FBgn0015574	alpha-Est6	3R	7524567	7528777	-	1836	0	0	0	0	NA	NA	NA	NA	0	0	NA	NA	NA	NA	0	0	NA	NA	NA	NA
FBgn0015575	alpha-Est7	3R	7519563	7523753	-	2017	85.157	42.2196	29.278	14.5156	-1.53225	0.266805	9.30372e-09	1.26712e-07	39.6576	19.6617	-0.958549	0.271283	0.000410274	0.00131071	146.785	72.774	0.792958	0.235795	0.000771262	0.0780517
FBgn0015576	alpha-Est8	3R	7509343	7515670	-	2646	21.391	8.08429	35.4914	13.4132	0.733783	0.366624	0.0453429	0.0990283	70.6982	26.7189	1.82993	0.364862	5.29215e-07	2.88047e-06	16.9486	6.40537	-0.341133	0.382762	0.372799	0.821574
FBgn0015577	alpha-Est9	3R	7493921	7505098	-	3455	30.1585	8.72894	15.8928	4.59994	-0.946852	0.443082	0.0326008	0.0760014	14.4813	4.19141	-1.03185	0.473114	0.0291851	0.0570537	42.9482	12.4308	0.476053	0.415654	0.252081	0.760574
FBgn0015582	dare	2R	11290994	11293174	-	1681	37.49	22.3022	19.1794	11.4095	-0.949536	0.370883	0.0104611	0.029945	27.3104	16.2465	-0.702808	0.386936	0.0693181	0.119812	30.8548	18.355	-0.262037	0.352025	0.456651	0.853554
FBgn0015583	Acp29AB	2L	8392456	8393222	-	767	0	0	0	0	NA	NA	NA	NA	0	0	NA	NA	NA	NA	0	0	NA	NA	NA	NA
FBgn0015584	Acp53Ea	2R	16749803	16750335	-	468	0.328379	0.701665	0	0	-1.70673	4.40736	0.698575	NA	0	0	-0.913739	4.40736	0.835759	NA	0	0	-1.94592	4.40736	0.658839	NA
FBgn0015585	Acp63F	3L	3815839	3816354	-	401	0	0	0	0	NA	NA	NA	NA	0	0	NA	NA	NA	NA	0	0	NA	NA	NA	NA
FBgn0015586	Acp76A	3L	19050757	19052026	-	1201	0.365022	0.303932	0.505966	0.421287	0.124892	1.94482	0.948797	0.969282	3.76428	3.13429	2.95994	1.73529	0.0880581	0.146365	0.207585	0.172843	-0.984184	2.02791	0.627449	NA
FBgn0015589	Apc	3R	28832301	28844748	-	8506	329.107	38.6911	508.563	59.7887	0.616424	0.267296	0.0211026	0.0534078	613.174	72.0872	0.894123	0.269097	0.000891552	0.00264141	264.603	31.1078	-0.327295	0.268554	0.222946	0.734886
FBgn0015591	AstA	3R	24760530	24765071	-	1459	1.02178	0.700329	1.55335	1.06467	0.404886	1.46113	0.7817	0.851251	0.757681	0.519315	-0.144678	1.57582	0.926848	0.9496	2.22485	1.52491	0.920306	1.41098	0.514243	NA
FBgn0015600	toc	2L	3068345	3144786	-	11265	19.7229	1.75081	130.121	11.5509	2.57774	0.299522	7.55406e-18	3.67834e-16	165.501	14.6916	2.9075	0.303744	1.04641e-21	3.09718e-20	27.9878	2.48449	0.359808	0.319568	0.2602	0.766782
FBgn0015602	BEAF-32	2R	14770469	14772630	+	1919	540.125	281.462	550.942	287.099	0.0192529	0.167888	0.908701	0.943819	422.648	220.244	-0.33793	0.172871	0.0506055	0.0915569	776.818	404.804	0.515413	0.166677	0.00198622	0.139427
FBgn0015609	CadN	2L	17647053	17778340	-	14396	320.122	22.2369	814.658	56.5892	1.35228	0.158761	1.62737e-17	7.44397e-16	1013.66	70.4129	1.65318	0.160462	6.85917e-25	2.57774e-23	349.553	24.2813	0.131891	0.160807	0.412111	0.837788
FBgn0015614	CanB2	2R	7786010	7789053	+	2061	1086.21	527.032	872.048	423.119	-0.314541	0.106861	0.0032458	0.0110516	1050.69	509.794	-0.0544399	0.109049	0.617622	0.706824	1040.28	504.743	-0.0603825	0.105987	0.568871	0.900466
FBgn0015615	SMC3	X	16588996	16593439	-	4020	771.913	192.018	1163.66	289.469	0.58574	0.141046	3.28381e-05	0.000204128	986.722	245.453	0.346613	0.143691	0.0158562	0.0338542	716.975	178.352	-0.113069	0.141663	0.424781	0.842751
FBgn0015618	Cdk8	3L	9837080	9838670	-	1529	88.2901	57.7437	329.403	215.437	1.86754	0.211571	1.07532e-18	5.7971e-17	417.627	273.137	2.24303	0.21416	1.14189e-25	4.59648e-24	97.4465	63.7322	0.111214	0.218777	0.611211	0.910916
FBgn0015621	Clp	2L	819964	821209	+	1246	113.574	91.1509	129.678	104.076	0.232323	0.244863	0.34273	0.475988	122.415	98.2467	0.148315	0.254037	0.559332	0.655098	97.3746	78.1497	-0.178197	0.245912	0.468674	0.85841
FBgn0015622	Cnx99A	3R	29315254	29319644	-	2795	3040.47	1087.82	1786.11	639.036	-0.766804	0.249941	0.00215535	0.00783661	2895.47	1035.94	-0.0754177	0.250225	0.76311	0.826676	2825.95	1011.07	-0.104913	0.24965	0.674309	0.927916
FBgn0015623	Cpr	2L	6338836	6346280	+	3344	947.809	283.436	940.39	281.217	-0.014649	0.226412	0.948412	0.969281	703.695	210.435	-0.414734	0.228998	0.0701285	0.120984	916.306	274.015	-0.0523633	0.226235	0.816961	0.962683
FBgn0015625	CycB3	3R	24867934	24870816	-	2883	248.319	86.1322	316.567	109.805	0.338658	0.242986	0.163397	0.273312	160.108	55.5351	-0.582495	0.253187	0.0214112	0.0438637	281.636	97.6887	0.170017	0.242793	0.483767	0.86314
FBgn0015663	Ugt36A1	2L	3619097	3621573	+	2303	137.161	59.5574	84.4256	36.659	-0.714111	0.20725	0.000569704	0.00251575	72.8102	31.6154	-0.883109	0.221475	6.68e-05	0.000250107	105.707	45.8995	-0.396623	0.202135	0.0497426	0.553148
FBgn0015664	Dref	2L	9964147	9967229	-	2872	559.988	194.982	539.199	187.744	-0.0594555	0.1945	0.759845	0.837038	372.867	129.828	-0.551249	0.199732	0.00578123	0.014102	596.839	207.813	0.0868485	0.193867	0.654168	0.922167
FBgn0015714	Cyp6a17	2R	14873953	14875739	+	1727	339.458	196.559	132.932	76.9727	-1.33927	0.218919	9.49734e-10	1.50118e-08	81.3855	47.1254	-2.0823	0.237414	1.77484e-18	4.06956e-17	240.285	139.134	-0.48556	0.213793	0.0231369	0.438527
FBgn0015721	ktub	2R	21101928	21123704	+	2523	0	0	0.546315	0.216534	1.15375	4.36529	0.791547	NA	0	0	0	4.40736	1	NA	0.223579	0.0886161	-0.0224141	4.40736	0.995942	NA
FBgn0015737	Hmu	3R	27288769	27291592	+	2360	4223.98	1789.82	2075.52	879.457	-1.02356	0.158956	1.2002e-10	2.11895e-09	2091.52	886.238	-1.0159	0.160036	2.18271e-10	1.93812e-09	3308.52	1401.92	-0.3512	0.158559	0.0267631	0.4609
FBgn0015754	Lis-1	2R	16178826	16185103	+	3459	776.555	224.503	815.349	235.718	0.0720028	0.111689	0.519141	0.644886	932	269.442	0.267857	0.114139	0.0189376	0.0393955	685.937	198.305	-0.177623	0.111695	0.111779	0.662571
FBgn0015756	RpL9	2L	11002758	11004189	-	916	8195.12	8946.64	2897.11	3162.79	-1.49967	0.371688	5.46603e-05	0.000322514	3652.92	3987.9	-1.16704	0.371915	0.00170143	0.00474003	6577.05	7180.19	-0.31685	0.371526	0.393751	0.828418
FBgn0015765	p38a	3R	24150416	24152321	-	1634	467.341	286.01	423.995	259.483	-0.143415	0.183794	0.435213	0.568382	287.224	175.78	-0.644739	0.190484	0.000712451	0.0021588	445.643	272.731	-0.071364	0.183086	0.696697	0.934742
FBgn0015766	Msr-110	3L	5566919	5577348	-	2902	1749.01	602.69	1704.01	587.185	-0.0377825	0.166644	0.820637	0.882093	3199.96	1102.67	0.866787	0.166884	2.05893e-07	1.20153e-06	2660.19	916.676	0.604651	0.166194	0.000274524	0.0418685
FBgn0015770	MstProx	3R	7365939	7369305	-	3262	1.77464	0.544033	1.32789	0.407077	-0.135178	1.45465	0.925961	0.954088	2.15413	0.66037	0.170139	1.49356	0.909305	0.9365	1.53643	0.471009	0.089908	1.41471	0.949327	0.990447
FBgn0015772	Nak	2L	18957732	18968744	-	7322	723.304	98.7851	1282.77	175.194	0.820846	0.248781	0.000968664	0.00400419	2056.93	280.924	1.49772	0.249187	1.85007e-09	1.46726e-08	699.736	95.5662	-0.0539005	0.249252	0.828794	0.963903
FBgn0015773	NetA	X	14604012	14653928	-	3343	0	0	1.45003	0.433752	2.59766	2.10902	0.218065	NA	1.3102	0.391923	2.71097	2.15978	0.209405	NA	0.241258	0.0721682	-0.0224031	2.33707	0.992352	NA
FBgn0015774	NetB	X	14686038	14749376	-	8168	5.24856	0.642576	6.9407	0.849743	0.298078	0.753991	0.692597	0.785382	11.9382	1.46158	0.713262	0.772074	0.355577	0.459672	1.9676	0.240891	-1.49289	0.849823	0.0789672	0.622706
FBgn0015776	nrv1	2L	6778555	6786861	-	2195	1772.63	807.574	1737.22	791.442	-0.0294577	0.169063	0.861676	0.910748	2573.75	1172.55	0.529203	0.169607	0.00180743	0.00499998	2002.35	912.233	0.1751	0.168808	0.29961	0.795912
FBgn0015777	nrv2	2L	6789770	6798862	-	3568	762.476	213.699	444.415	124.556	-0.786939	0.148565	1.1776e-07	1.25625e-06	389.674	109.213	-0.980929	0.153967	1.87753e-10	1.68531e-09	937.479	262.746	0.290801	0.146024	0.0464309	0.541976
FBgn0015778	rin	3R	13647004	13654527	+	5711	38801.7	6794.21	16941.5	2966.47	-1.19551	0.571697	0.0365138	0.08305	33768.4	5912.87	-0.20063	0.571703	0.725638	0.795718	19442.1	3404.32	-0.996892	0.57169	0.0812003	0.62282
FBgn0015781	P5cr	3R	19028931	19030159	+	1168	57.6235	49.3352	49.0375	41.9842	-0.17614	0.316835	0.578255	0.69493	47.3676	40.5544	-0.14512	0.330717	0.660804	0.744206	59.1727	50.6616	0.0895037	0.311521	0.773874	0.954154
FBgn0015789	Rab10	X	20251338	20254691	+	2336	1187.15	508.199	1524.76	652.722	0.360327	0.123196	0.00344644	0.0116255	1579.55	676.176	0.416777	0.124856	0.000843694	0.00251525	1383.36	592.193	0.219215	0.12309	0.0749237	0.616919
FBgn0015790	Rab11	3R	21111408	21116146	+	1815	7247.56	3993.14	10220.7	5631.26	0.49683	0.147631	0.000764463	0.00326567	10306.1	5678.29	0.510227	0.147877	0.000559853	0.00173948	6324.22	3484.42	-0.195675	0.147697	0.185224	0.715445
FBgn0015791	Rab14	2L	14355145	14358764	+	1857	980.34	527.916	826.638	445.147	-0.2434	0.395212	0.537979	0.661572	1887.27	1016.3	0.94274	0.395245	0.0170697	0.0359954	730.795	393.535	-0.421188	0.395171	0.286497	0.783389
FBgn0015793	Rab19	3L	8297018	8298506	+	1105	68.8956	62.349	152.141	137.684	1.12628	0.205742	4.39453e-08	5.12903e-07	196.024	177.398	1.52399	0.209787	3.74544e-13	4.58412e-12	76.412	69.1512	0.133644	0.211639	0.527731	0.884212
FBgn0015794	Rab18	X	5670827	5671812	-	833	68.4338	82.1534	101.88	122.305	0.620897	0.245492	0.0114323	0.0322362	127.777	153.394	0.991521	0.250955	7.78272e-05	0.000288295	70.4835	84.6141	0.0892671	0.247905	0.718783	0.942567
FBgn0015795	Rab7	3R	23993008	23995452	+	1700	1375.12	808.891	2532.9	1489.94	0.882426	0.103289	1.30508e-17	6.06161e-16	3585.16	2108.92	1.38752	0.103924	1.16406e-40	1.30159e-38	1461.67	859.806	0.089126	0.103774	0.390425	0.827139
FBgn0015797	Rab6	2L	12107221	12109116	-	1896	1162.78	613.282	1000.26	527.561	-0.211984	0.154752	0.170739	0.282393	1282.34	676.34	0.156439	0.15608	0.316199	0.41832	894.7	471.888	-0.3725	0.154646	0.0160083	0.376395
FBgn0015799	Rbf	X	797090	801479	-	3619	837.509	231.42	1154.59	319.036	0.468222	0.115706	5.19549e-05	0.000307955	1515.88	418.866	0.868929	0.117062	1.14684e-13	1.50317e-12	847.871	234.283	0.0235781	0.116009	0.838944	0.966983
FBgn0015801	Reg-5	2R	24788008	24793410	-	1781	298.708	167.719	386.632	217.087	0.358245	0.175464	0.041181	0.0913485	403.333	226.465	0.4328	0.179453	0.0158754	0.0338873	325.168	182.576	0.106478	0.175476	0.543988	0.89184
FBgn0015803	RtGEF	2L	20350434	20365254	+	8609	444.82	51.6692	716.732	83.2538	0.677323	0.160692	2.49733e-05	0.000160985	966.099	112.22	1.11423	0.162223	6.48716e-12	6.97793e-11	463.054	53.7872	0.0461023	0.161421	0.775182	0.954154
FBgn0015805	HDAC1	3L	4626734	4629467	+	2124	756.885	356.349	1039.62	489.465	0.456243	0.215005	0.0338366	0.0782404	975.805	459.419	0.380501	0.216752	0.0791791	0.133842	871.15	410.146	0.201483	0.21501	0.348713	0.814457
FBgn0015808	ScpX	2L	18831229	18833630	+	1883	495.325	263.051	802.345	426.099	0.70573	0.266944	0.00819952	0.0243965	997.21	529.586	1.01543	0.268071	0.000151904	0.000528137	363.976	193.296	-0.434232	0.268047	0.105236	0.654076
FBgn0015818	Spx	X	6255822	6257596	+	1643	301.158	183.298	215.539	131.186	-0.488035	0.180533	0.00686555	0.0210001	138.963	84.5787	-1.03806	0.192376	6.81531e-08	4.29849e-07	282.094	171.695	-0.100961	0.177995	0.570569	0.900466
FBgn0015828	TfIIEalpha	3L	11682038	11683805	+	1622	554.467	341.842	351.854	216.926	-0.648666	0.319829	0.0425437	0.0937971	176.442	108.781	-1.61176	0.327768	8.77134e-07	4.62949e-06	398.474	245.668	-0.468639	0.319196	0.142054	0.686549
FBgn0015829	TfIIEbeta	3L	4287038	4288349	+	1121	96.9241	86.4622	185.56	165.53	0.975651	0.191047	3.27554e-07	3.27445e-06	223.019	198.947	1.25236	0.195664	1.54807e-10	1.40913e-09	102.635	91.5564	0.124197	0.195077	0.524347	0.883186
FBgn0015831	Rtnl2	3R	7528864	7530241	-	1026	1.31352	1.28023	0	0	-3.20668	4.33124	0.459081	NA	0	0	-2.41369	4.33124	0.577339	NA	0.415169	0.404648	-1.68359	4.29948	0.695368	NA
FBgn0015834	eIF3i	2L	4966367	4967775	-	1177	956.723	812.849	433.199	368.054	-1.13742	0.247472	4.30335e-06	3.39212e-05	544.53	462.643	-0.822176	0.249577	0.000986726	0.00289591	874.215	742.749	-0.124606	0.245961	0.612431	0.911557
FBgn0015838	Vang	2R	9103238	9106796	+	3492	941.429	269.596	634.762	181.776	-0.565313	0.147738	0.000130007	0.000685775	546.126	156.393	-0.816142	0.152075	8.01912e-08	4.99513e-07	797.491	228.377	-0.237145	0.146765	0.106134	0.65613
FBgn0015872	Drip	2R	11411203	11429645	-	2499	1.3868	0.554943	2.3123	0.925291	0.532614	1.09069	0.625317	0.733283	5.09818	2.04009	1.72075	1.0639	0.105792	0.169977	0.690101	0.276151	-1.26046	1.28237	0.32565	0.805768
FBgn0015903	apt	2R	23564891	23599526	+	3696	1799.17	486.789	5859.16	1585.27	1.70193	0.259737	5.65689e-11	1.04347e-09	9549.8	2583.82	2.40512	0.25982	2.10469e-20	5.52528e-19	2380.22	644	0.402332	0.259932	0.121662	0.67026
FBgn0015904	ara	3L	12580672	12596018	+	2942	1.05842	0.359763	4.75055	1.61473	1.95467	1.14816	0.0886731	0.170007	3.14922	1.07043	1.69647	1.19838	0.156882	0.236616	0.448843	0.152564	-1.45069	1.49753	0.332684	0.807512
FBgn0015905	ast	2L	1077948	1080803	+	2745	237.83	86.641	279.505	101.823	0.249624	0.167031	0.135052	0.235677	249.852	91.0209	0.0571262	0.174072	0.742779	0.810915	203.301	74.0625	-0.207894	0.167964	0.215815	0.731421
FBgn0015919	caup	3L	12609631	12621798	+	4317	0	0	0	0	0	4.40736	1	NA	0.25256	0.0585037	0.99253	4.38784	0.821046	NA	0.207585	0.0480854	-0.0224048	4.40736	0.995944	NA
FBgn0015924	crq	2L	448254	453024	-	2848	530.597	186.305	760.186	266.919	0.529265	0.183646	0.00395175	0.0131247	753.929	264.722	0.504979	0.186135	0.00666811	0.0159661	432.033	151.697	-0.286728	0.184599	0.120364	0.66959
FBgn0015925	csul	2R	16264652	16266959	+	2013	176.167	87.5146	105.913	52.6147	-0.723346	0.194994	0.000207601	0.00104632	67.104	33.3353	-1.3265	0.214872	6.68166e-10	5.61893e-09	131.345	65.2481	-0.41003	0.19066	0.0315091	0.477543
FBgn0015926	dah	X	15328342	15331002	+	2353	114.532	48.675	145.533	61.8501	0.364791	0.217775	0.0939176	0.177878	103.429	43.9563	-0.11336	0.231056	0.623697	0.711518	138.489	58.8565	0.297337	0.216757	0.17014	0.702081
FBgn0015929	dpa	2R	7496702	7500145	-	3071	338.389	110.189	371.182	120.867	0.133227	0.197613	0.500196	0.627635	230.334	75.0029	-0.516687	0.205746	0.0120291	0.0266767	322.035	104.863	-0.0706491	0.197499	0.720554	0.942665
FBgn0015946	grim	3L	18302719	18304417	-	1699	0	0	0	0	0	4.40736	1	NA	0	0	0	4.40736	1	NA	0.207585	0.12218	-0.0223957	4.40736	0.995946	NA
FBgn0015949	hrg	2R	19663919	19669832	-	4587	5466.76	1191.8	2114.4	460.954	-1.36962	0.225369	1.22279e-09	1.90945e-08	1089.26	237.467	-2.3152	0.227363	2.36632e-24	8.57271e-23	4899.9	1068.21	-0.157319	0.224998	0.484425	0.86314
FBgn0016013	Faa	3L	4072032	4073954	-	1421	156.755	110.313	158.924	111.839	0.00402633	0.398418	0.991937	0.99578	125.937	88.6256	-0.28175	0.40571	0.487393	0.587972	195.552	137.616	0.302714	0.397035	0.445799	0.851275
FBgn0016031	lama	3L	5343619	5355923	-	4046	44.2442	10.9353	7.98919	1.97459	-2.49597	0.416462	2.05662e-09	3.08903e-08	7.25231	1.79246	-2.7184	0.47361	9.48229e-09	6.77831e-08	37.9179	9.3717	-0.265203	0.343189	0.439664	0.849614
FBgn0016032	lbm	2R	7049238	7051964	+	1098	0	0	2.98945	2.72264	3.5896	1.42404	0.0117114	0.0328389	8.86246	8.07146	5.19844	1.39853	0.000201544	0.000687011	0.241258	0.219725	-0.0224005	1.79676	0.990053	0.999184
FBgn0016034	mael	3L	22721203	22726234	+	2152	126.435	58.7525	48.5735	22.5713	-1.39867	0.217286	1.21843e-10	2.14695e-09	35.901	16.6826	-1.71277	0.24127	1.25656e-12	1.45719e-11	132.439	61.5424	0.0504601	0.198472	0.799308	0.958867
FBgn0016036	mei-P22	3L	7244388	7245383	+	996	11.2797	11.325	5.00353	5.02362	-1.18159	0.579588	0.0414826	0.0919726	0.78138	0.784518	-3.35566	0.932036	0.000317778	0.00104091	9.47956	9.51763	-0.260102	0.524588	0.620021	0.914203
FBgn0016038	Vsp37A	X	621530	623051	+	1379	241.652	175.237	116.401	84.4094	-1.05383	0.296316	0.000375924	0.00175322	63.8037	46.2681	-1.75082	0.313167	2.26177e-08	1.52417e-07	230.168	166.909	-0.0707471	0.291679	0.808353	0.960966
FBgn0016041	Tom40	X	7736893	7739978	+	2395	1861.28	777.153	729.644	304.653	-1.34987	0.448311	0.00260388	0.00918356	1250.79	522.252	-0.579388	0.448638	0.196552	0.284934	1151.62	480.843	-0.691352	0.447915	0.122712	0.670486
FBgn0016047	nompA	2R	11310335	11318676	-	5235	0	0	0	0	NA	NA	NA	NA	0	0	NA	NA	NA	NA	0	0	NA	NA	NA	NA
FBgn0016053	pgc	2R	22330200	22332813	+	1212	29.071	23.986	15.8019	13.0379	-0.889667	0.355049	0.0122188	0.0339943	9.30504	7.67742	-1.4157	0.408594	0.000530586	0.00165936	31.1196	25.6762	0.0907858	0.325875	0.780559	0.955423
FBgn0016054	phr6-4	2L	20643351	20645791	-	2167	162.701	75.0812	130.958	60.4328	-0.321949	0.195535	0.0996604	0.18607	100.188	46.2335	-0.636288	0.208366	0.00226038	0.00611365	162.569	75.0204	-0.00252153	0.192001	0.989522	0.999184
FBgn0016059	Sema1b	2R	17672839	17683499	-	4565	537.553	117.755	980.113	214.702	0.855869	0.184345	3.4379e-06	2.77514e-05	1706.37	373.794	1.65568	0.184843	3.32963e-19	8.10657e-18	539.748	118.236	-0.00514094	0.185154	0.977849	0.998278
FBgn0016061	side	3R	27375088	27437482	-	11723	0	0	9.05919	0.772771	5.21949	1.2777	4.40622e-05	0.000266581	20.8978	1.78264	6.47365	1.27258	3.63713e-07	2.02592e-06	0.415169	0.0354149	0.862403	1.61836	0.594111	0.904392
FBgn0016070	smg	3L	8990317	8997989	-	5963	310.526	52.0754	326.676	54.7838	0.0620317	0.194374	0.749624	0.829486	310.899	52.138	-0.0151164	0.199533	0.939611	0.957692	320.322	53.7183	0.0308992	0.193768	0.873302	0.975939
FBgn0016075	vkg	2L	5012144	5028191	-	6503	11.2431	1.7289	5.02615	0.772897	-1.17686	0.557189	0.0346745	0.0796871	6.61354	1.017	-0.609089	0.5619	0.278373	0.37709	11.0817	1.70408	-0.0336336	0.492835	0.94559	0.989899
FBgn0016076	vri	2L	5288944	5311223	+	4739	1165.94	246.032	1699.88	358.701	0.541072	0.337917	0.109333	0.199105	2372.34	500.599	1.01933	0.338253	0.00258238	0.00687496	1452.6	306.52	0.314248	0.337909	0.352382	0.815835
FBgn0016078	wun	2R	9400531	9413463	-	2181	50.6957	23.2443	35.3101	16.1899	-0.541488	0.254877	0.0336275	0.0778339	40.5309	18.5836	-0.389024	0.2681	0.146768	0.223972	57.944	26.5676	0.177071	0.239564	0.459824	0.853554
FBgn0016081	fry	3L	9631834	9679103	-	11788	571.871	48.513	557.506	47.2943	-0.0427477	0.320569	0.893917	0.933926	816.067	69.2286	0.50423	0.32149	0.116784	0.184431	533.195	45.232	-0.107797	0.320383	0.736522	0.946501
FBgn0016119	ATPsynCF6	3R	23355220	23356064	-	704	2049.58	2911.33	1005.74	1428.61	-1.02493	0.338102	0.00243399	0.00868241	891.243	1265.97	-1.20204	0.33944	0.000398255	0.00127546	1384.59	1966.74	-0.563567	0.337784	0.0952318	0.641119
FBgn0016120	ATPsynD	3R	19095000	19096271	+	950	769.131	809.612	360.444	379.414	-1.08886	0.290349	0.000176717	0.000907844	223.91	235.695	-1.73151	0.296705	5.35291e-09	3.96738e-08	616.2	648.632	-0.315237	0.289002	0.275371	0.777285
FBgn0016122	Acer	2L	8521933	8525740	+	3198	2.43139	0.760286	1.5986	0.499874	-0.470119	1.13996	0.680047	0.775618	3.82683	1.19663	0.243667	1.13897	0.830597	0.87913	3.58737	1.12175	0.708537	1.04052	0.495908	0.868997
FBgn0016123	Alp4	3R	31048929	31052540	+	2412	16.4114	6.80407	8.36811	3.46937	-0.989087	0.441268	0.0249959	0.0612356	2.87296	1.19111	-2.09353	0.576006	0.000278456	0.000922787	24.7112	10.2451	0.573712	0.384805	0.135984	0.681736
FBgn0016126	CaMKI	4	445504	453947	+	3382	713.085	210.847	833.863	246.559	0.221087	0.347765	0.524947	0.649354	933.875	276.131	0.389879	0.348799	0.263664	0.361107	1001.15	296.024	0.484709	0.347479	0.163037	0.700734
FBgn0016131	Cdk4	2R	16579470	16585448	+	2462	187.632	76.2114	223.389	90.7346	0.241708	0.201685	0.230745	0.354635	188.185	76.4357	0.0492736	0.209313	0.813893	0.866353	238.219	96.7584	0.333424	0.200399	0.0961514	0.641119
FBgn0016641	PTP-ER	2R	21619321	21624446	-	5069	615.123	121.35	968.845	191.131	0.647781	0.212366	0.00228611	0.00824786	803.926	158.597	0.386822	0.21467	0.0715555	0.123102	657.657	129.741	0.0883623	0.212689	0.677811	0.929831
FBgn0016650	Lgr1	3R	17725777	17733207	+	3222	0.656758	0.203836	1.05228	0.326593	0.432212	2.28608	0.850044	NA	0.505121	0.156772	-0.0278555	2.36852	0.990617	NA	0	0	-2.65845	2.4675	0.281309	NA
FBgn0016660	H15	2L	5404280	5416593	+	3282	0	0	0	0	NA	NA	NA	NA	0	0	NA	NA	NA	NA	0	0	NA	NA	NA	NA
FBgn0016672	Ipp	3R	13958789	13960474	+	1402	87.9914	62.7614	57.6477	41.1182	-0.635521	0.218563	0.00364075	0.0121873	63.3843	45.2099	-0.570817	0.23106	0.013495	0.0294704	109.809	78.3234	0.288852	0.206152	0.161167	0.698417
FBgn0016675	Lectin-galC1	2L	19417447	19418274	+	759	4.11685	5.42404	1.05228	1.3864	-2.06864	1.04429	0.0476019	0.102982	4.07939	5.37469	-0.631773	0.934385	0.498953	0.598783	4.25811	5.61015	-0.0494935	0.823675	0.952085	0.991266
FBgn0016684	NaPi-T	2R	14842720	14845874	-	2660	9.44561	3.55098	6.82345	2.56521	-0.576513	0.729103	0.42911	0.563054	3.96945	1.49227	-1.34619	0.822374	0.10164	0.164502	12.6645	4.7611	0.339496	0.697445	0.626421	0.916271
FBgn0016685	Nlp	3R	30004785	30010352	+	1080	5634.57	5217.19	2262.81	2095.19	-1.31561	0.338392	0.000101151	0.000552216	1763.45	1632.82	-1.67957	0.339128	7.32286e-07	3.89449e-06	4397.16	4071.44	-0.357039	0.338187	0.291085	0.787355
FBgn0016687	Nurf-38	2R	24558967	24561087	-	1481	1214.27	819.901	533.128	359.978	-1.18529	0.184488	1.32081e-10	2.30938e-09	376.667	254.333	-1.65372	0.18987	3.04573e-18	6.74455e-17	1183.2	798.917	-0.034579	0.182731	0.849909	0.970041
FBgn0016691	ATPsynO	3R	15265591	15266690	+	802	377.175	470.293	179.183	223.42	-1.06206	0.249436	2.06416e-05	0.000135866	176.398	219.948	-1.05805	0.25604	3.59041e-05	0.000141754	351.71	438.542	-0.0869697	0.245867	0.723544	0.943734
FBgn0016693	Past1	3R	12697322	12704875	+	2896	489.383	168.986	401.515	138.645	-0.283901	0.1535	0.0643831	0.131274	412.914	142.581	-0.20357	0.157656	0.196623	0.284934	559.603	193.233	0.195438	0.151714	0.197677	0.72509
FBgn0016694	Pdp1	3L	7811458	7867369	-	12138	5078.42	418.39	2540.04	209.263	-0.999341	0.817371	0.22147	0.344471	8113.07	668.402	0.67553	0.817337	0.40852	0.512759	2640.33	217.526	-0.943459	0.817346	0.248379	0.755767
FBgn0016696	Pitslre	3L	20771528	20776931	+	4544	1359.56	299.198	1216.8	267.783	-0.161395	0.318175	0.611976	0.721514	1799.51	396.019	0.395481	0.318605	0.214499	0.305363	1437.04	316.249	0.0786811	0.317968	0.80456	0.960865
FBgn0016697	Prosalpha5	2R	17412767	17413769	+	945	1871.21	1980.11	3164.1	3348.26	0.757387	0.29993	0.0115629	0.032503	2869.43	3036.44	0.620757	0.300396	0.0387851	0.0729092	2564.4	2713.65	0.45422	0.299941	0.129933	0.672126
FBgn0016698	Ptpa	2L	3377002	3378590	+	1393	74.0363	53.1488	61.2617	43.9782	-0.237382	0.273111	0.384749	0.519636	74.9264	53.7878	0.133241	0.280462	0.634731	0.720848	67.3244	48.3305	-0.0946192	0.269192	0.725218	0.945347
FBgn0016701	Rab4	2R	17573462	17574979	+	1316	1012.34	769.255	1253.28	952.339	0.305231	0.236063	0.196009	0.313152	1192.42	906.096	0.245061	0.237387	0.301919	0.403494	1472.59	1118.99	0.537845	0.235797	0.0225506	0.434933
FBgn0016715	Reg-2	3L	605165	606569	-	883	84.6648	95.8831	12.1467	13.7562	-2.81866	0.429587	5.33259e-11	9.94525e-10	15.2533	17.2744	-2.72681	0.458341	2.69272e-09	2.08622e-08	162.885	184.468	0.959222	0.375591	0.0106524	0.310616
FBgn0016726	RpL29	2R	21293768	21294404	+	389	612.027	1573.33	184.683	474.764	-1.72671	0.900806	0.0552564	0.116061	319.569	821.514	-0.943262	0.901427	0.295372	0.396206	234.285	602.275	-1.38334	0.900244	0.124385	0.670486
FBgn0016754	sba	3R	23894174	23922973	-	6427	704.072	109.549	1438.17	223.77	1.02685	0.342559	0.00272137	0.00952743	3070.88	477.81	2.11766	0.342622	6.38012e-10	5.38033e-09	787.177	122.48	0.157264	0.342861	0.646463	0.919556
FBgn0016756	Usp47	3L	5752973	5761886	+	5636	2753.17	488.497	1758.35	311.985	-0.645218	0.0841885	1.80279e-14	5.54656e-13	1517.29	269.214	-0.86139	0.0867855	3.22473e-23	1.06205e-21	2065.89	366.553	-0.413461	0.0836587	7.7233e-07	0.000727693
FBgn0016762	angel	2R	23694003	23695232	+	1230	70.6661	57.4521	59.9311	48.7245	-0.190331	0.351645	0.58833	0.703149	51.4154	41.8011	-0.385088	0.367204	0.294316	0.394906	56.1441	45.6456	-0.28309	0.350319	0.419038	0.840836
FBgn0016794	dos	3L	2589414	2595590	+	4666	622.813	133.479	987.71	211.682	0.655948	0.135378	1.26419e-06	1.12143e-05	918.471	196.843	0.543632	0.138108	8.27536e-05	0.000304923	553.158	118.551	-0.181532	0.136419	0.18329	0.711488
FBgn0016797	fz2	3L	19140975	19235373	-	7422	5.95785	0.802729	10.654	1.43546	0.96157	0.584364	0.0998671	0.186264	40.71	5.48505	2.74024	0.56483	1.22569e-06	6.31101e-06	9.46356	1.27507	0.764413	0.583082	0.189862	0.71806
FBgn0016917	Stat92E	3R	20535323	20552311	-	5210	2163.61	415.281	4191.3	804.473	0.951443	0.218272	1.30665e-05	9.08239e-05	5896.6	1131.78	1.44432	0.218477	3.82174e-11	3.75418e-10	2735.04	524.96	0.335524	0.218359	0.124399	0.670486
FBgn0016919	nompB	2L	21578292	21589423	-	2794	0	0	0	0	NA	NA	NA	NA	0	0	NA	NA	NA	NA	0	0	NA	NA	NA	NA
FBgn0016920	nompC	2L	5346200	5365760	+	6886	0	0	0	0	0	3.7099	1	NA	1.10504	0.160476	2.44582	3.61689	0.4989	NA	0.864012	0.125474	1.82699	3.59362	0.611173	NA
FBgn0016926	Pino	2L	1114654	1128953	-	2497	1183.88	474.12	2047.99	820.179	0.785309	0.160663	1.01904e-06	9.1744e-06	2173.8	870.565	0.86823	0.161652	7.83056e-08	4.88776e-07	1370.1	548.7	0.205264	0.16088	0.201998	0.727507
FBgn0016930	Dyrk2	2L	14184478	14234126	-	4955	1471.04	296.879	7000.7	1412.86	2.24703	0.189263	1.64451e-32	2.65969e-30	10377.1	2094.28	2.81436	0.189388	5.96742e-50	1.103e-47	1748.22	352.82	0.245361	0.189758	0.196004	0.724664
FBgn0016970	l(2)k10201	2R	9399080	9399899	+	820	32.8857	40.1046	18.6115	22.697	-0.775587	0.464058	0.0946594	0.178722	24.7056	30.1288	-0.644727	0.484367	0.183165	0.268957	32.1146	39.1641	0.00607031	0.447586	0.989179	0.999184
FBgn0016974	swaPsi	X	6361496	6363310	-	1547	27.7589	17.9437	42.6813	27.5897	0.526864	0.42141	0.211211	0.332107	44.3454	28.6654	0.654086	0.433627	0.13145	0.203974	36.6409	23.6851	0.30519	0.421154	0.468666	0.85841
FBgn0016975	stnB	X	22980722	23004648	-	8332	0	0	0	0	NA	NA	NA	NA	0	0	NA	NA	NA	NA	0	0	NA	NA	NA	NA
FBgn0016976	stnA	X	22980722	23004648	-	8332	0	0	0	0	NA	NA	NA	NA	0	0	NA	NA	NA	NA	0	0	NA	NA	NA	NA
FBgn0016977	spen	2L	159032	203397	+	23035	15968.6	693.231	15373.6	667.4	-0.0548303	0.292706	0.851408	0.903317	20442	887.432	0.355652	0.292755	0.224424	0.316938	11831.5	513.63	-0.432692	0.292712	0.139349	0.686137
FBgn0016978	snRNP-U1-70K	2L	6968711	6971737	-	2948	456.248	154.765	298.636	101.301	-0.599661	0.148451	5.3577e-05	0.000316328	229.689	77.9136	-0.960048	0.156989	9.63188e-10	7.93429e-09	462.635	156.932	0.0332002	0.145578	0.819601	0.96273
FBgn0016983	smid	3L	7381614	7385637	+	3386	1808.4	534.082	1335.91	394.538	-0.435422	0.125639	0.000528944	0.00235992	976.838	288.493	-0.867693	0.128748	1.58989e-11	1.62892e-10	1554.72	459.163	-0.216962	0.125182	0.0830661	0.628439
FBgn0016984	sktl	2R	20827282	20836028	-	4106	661.849	161.191	825.513	201.05	0.319673	0.199666	0.109368	0.199105	784.965	191.175	0.225691	0.202012	0.263902	0.361324	663.233	161.528	0.00347009	0.199746	0.986139	0.999184
FBgn0017414	cag	2R	10893034	10894414	-	1324	23.1484	17.4837	21.4189	16.1774	0.017472	0.454477	0.969334	0.98169	30.1057	22.7385	0.442623	0.465308	0.341479	0.445195	19.864	15.003	-0.0914894	0.451946	0.839577	0.966983
FBgn0017418	ari-1	X	18130392	18137784	-	4815	1836.71	381.456	2405.1	499.501	0.390686	0.378691	0.302224	0.434552	3256.37	676.298	0.824989	0.378921	0.0294651	0.0575513	1198.61	248.933	-0.614076	0.378901	0.105087	0.654005
FBgn0017424	asRNA:CR11538	3L	12129103	12131488	-	2386	0	0	0	0	0	4.40736	1	NA	0.276259	0.115783	1.0622	4.3837	0.808543	NA	0	0	0	4.40736	1	NA
FBgn0017429	CG5989	3L	8602411	8604149	-	1567	136.135	86.876	96.7138	61.7191	-0.472353	0.197216	0.0166155	0.0437587	79.9849	51.0433	-0.6695	0.21081	0.001494	0.00421927	94.2137	60.1236	-0.507359	0.195264	0.00936787	0.297924
FBgn0017430	Nelf-E	3L	8599442	8600879	-	1227	85.54	69.7147	178.962	145.853	1.09531	0.228173	1.5838e-06	1.37663e-05	197.458	160.928	1.29615	0.233295	2.76246e-08	1.84103e-07	102.39	83.4471	0.292321	0.231343	0.206379	0.729382
FBgn0017448	CG2187	3R	31755356	31758637	-	2580	0.365022	0.141481	0.483344	0.187343	0.0873098	2.11301	0.967041	NA	0.25256	0.0978916	0.0269197	2.14249	0.989975	NA	0.672421	0.260628	0.497198	2.01779	0.805367	NA
FBgn0017456	Ubc84D	3R	7518820	7519456	-	637	3.43036	5.38519	1.0749	1.68745	-1.85332	1.15435	0.108381	0.197865	0.276259	0.433688	-2.96617	1.41974	0.036687	0.0694697	6.79324	10.6644	0.824489	0.939969	0.380408	0.82344
FBgn0017457	U2af38	2L	292959	294681	-	1655	984.09	594.616	836.416	505.387	-0.229975	0.274483	0.402117	0.536373	390.734	236.093	-1.30708	0.278976	2.79576e-06	1.34974e-05	1017.26	614.658	0.0525935	0.274111	0.847845	0.970041
FBgn0017482	T3dh	2R	22329726	22332072	-	1959	222.502	113.58	488.89	249.561	1.14563	0.165652	4.64928e-12	1.01222e-10	358.756	183.132	0.729568	0.171415	2.07977e-05	8.58546e-05	258.667	132.04	0.229663	0.167656	0.170734	0.702081
FBgn0017545	RpS3A	4	65225	67207	-	1349	13349.3	9895.71	5366.19	3977.9	-1.31436	0.155206	2.48581e-17	1.10906e-15	4235.28	3139.57	-1.65745	0.155859	2.06395e-26	8.73512e-25	11823.8	8764.85	-0.174616	0.155	0.259931	0.766782
FBgn0017550	Rga	3R	5607275	5613112	-	2902	1202.42	414.341	2285.09	787.418	0.928752	0.317517	0.00344404	0.0116217	4661.63	1606.35	1.95473	0.31758	7.50412e-10	6.25827e-09	971.769	334.862	-0.304766	0.317891	0.337703	0.811204
FBgn0017551	Rca1	2L	6852315	6853866	+	1552	234.779	151.275	588.345	379.088	1.31898	0.152138	4.33543e-18	2.13402e-16	554.079	357.01	1.25802	0.155734	6.58249e-16	1.15538e-14	287.305	185.119	0.283497	0.154366	0.0662807	0.592334
FBgn0017556	Prosalpha4T2	2R	24500780	24502277	-	1254	0	0	0	0	NA	NA	NA	NA	0	0	NA	NA	NA	NA	0	0	NA	NA	NA	NA
FBgn0017558	Pdk	2R	9426439	9434638	+	3164	312.638	98.8111	284.131	89.8011	-0.135523	0.264834	0.608841	0.719504	558.276	176.446	0.810028	0.265499	0.00228109	0.00615609	316.267	99.958	0.0191806	0.263936	0.942068	0.988714
FBgn0017561	Ork1	X	10878054	10891250	-	4482	0	0	0	0	NA	NA	NA	NA	0	0	NA	NA	NA	NA	0	0	NA	NA	NA	NA
FBgn0017566	ND-75	X	8248651	8251687	-	2634	1434.46	544.594	758.948	288.135	-0.916321	0.138549	3.7484e-11	7.13996e-10	684.834	259.998	-1.04865	0.142003	1.52788e-13	1.96842e-12	1388.56	527.17	-0.0434347	0.137118	0.75142	0.949011
FBgn0017567	ND-23	3R	15836048	15837117	-	819	335.611	409.782	201.617	246.174	-0.733955	0.174325	2.55079e-05	0.000163615	171.768	209.729	-0.9069	0.182997	7.20305e-07	3.83528e-06	293.244	358.052	-0.193216	0.170991	0.258484	0.76586
FBgn0017572	Mo25	3L	16613218	16615472	-	2255	1575.46	698.654	1327.52	588.702	-0.245242	0.390367	0.529851	0.654556	2252.37	998.833	0.513299	0.390581	0.188781	0.275817	1122.3	497.694	-0.48743	0.390365	0.211792	0.730354
FBgn0017577	Mcm5	3R	10788524	10791150	+	2452	103.01	42.0105	149.998	61.1736	0.529337	0.202771	0.00904062	0.0265849	105.621	43.0753	-0.002784	0.216703	0.98975	0.993039	112.342	45.8163	0.115816	0.203895	0.570024	0.900466
FBgn0017578	Max	3L	19262232	19264184	-	1289	368.569	285.934	549.709	426.462	0.588821	0.284762	0.0386622	0.0869971	537.972	417.356	0.565178	0.287099	0.0490013	0.0890638	356.922	276.899	-0.0341034	0.285286	0.904847	0.982021
FBgn0017579	RpL14	3L	8601006	8602392	+	619	5333.35	8616.08	1431.18	2312.09	-1.89741	0.528825	0.000333262	0.00158361	2527.18	4082.68	-1.08001	0.528952	0.0411725	0.0768548	3268.25	5279.89	-0.706072	0.528594	0.181629	0.710412
FBgn0017581	Lk6	3R	11750931	11764457	-	6807	27472.4	4035.9	17443.4	2562.57	-0.655217	0.523716	0.210901	0.331765	24669	3624.06	-0.155523	0.523736	0.766505	0.829499	11843.9	1739.96	-1.21376	0.523723	0.0204734	0.418085
FBgn0017590	klg	3R	22899284	22961731	+	4052	1.42345	0.351295	5.92877	1.46317	1.83255	0.943998	0.0522261	0.110931	8.55396	2.11105	2.21446	0.958899	0.0209227	0.0430186	4.24043	1.0465	1.36877	0.952288	0.15062	0.69272
FBgn0019624	COX5A	3R	11819359	11820299	+	796	2962.13	3721.27	1484.18	1864.55	-0.995387	0.266069	0.000183223	0.000938072	1565.03	1966.12	-0.919378	0.266925	0.000572473	0.00177382	2166.68	2721.95	-0.449347	0.265771	0.090888	0.638734
FBgn0019637	Atu	3R	5613358	5615939	+	2351	662.253	281.69	541.107	230.16	-0.283841	0.270645	0.29429	0.426325	620.636	263.988	-0.0883255	0.272533	0.745869	0.812819	488.599	207.826	-0.430775	0.270516	0.111291	0.662571
FBgn0019643	AANAT1	2R	24139563	24157762	+	1887	6.92018	3.66729	10.9146	5.78409	0.554243	0.533379	0.29875	0.430994	24.0622	12.7516	1.75129	0.522619	0.000805223	0.00241727	9.11574	4.83081	0.292565	0.534114	0.583859	0.903723
FBgn0019644	ATPsynB	3L	9729999	9731224	+	918	1100.08	1198.34	464.495	505.986	-1.23888	0.211722	4.87373e-09	6.84363e-08	382.136	416.271	-1.50765	0.216238	3.12119e-12	3.46005e-11	973.038	1059.95	-0.171566	0.21003	0.414008	0.838229
FBgn0019650	toy	4	989725	1007922	+	3921	0.365022	0.0930941	0	0	-1.70673	4.40736	0.698575	NA	0	0	-0.913739	4.40736	0.835759	NA	0	0	-1.94592	4.40736	0.658839	NA
FBgn0019660	lncRNA:roX2	X	11579065	11580432	+	1368	4.84689	3.54305	6.4988	4.75059	0.308685	0.666311	0.643168	0.747296	5.07448	3.70942	0.023521	0.721649	0.973999	0.982256	4.79029	3.50167	-0.152334	0.67671	0.821894	0.963337
FBgn0019661	lncRNA:roX1	X	3857230	3862697	-	5468	12709.5	2324.34	4658.14	851.892	-1.44799	0.512205	0.00469912	0.0152545	16509.1	3019.21	0.376866	0.512167	0.461835	0.56441	5556.92	1016.26	-1.19346	0.512171	0.0197953	0.407367
FBgn0019662	qm	3L	7348313	7353622	+	2543	1216.76	478.473	1471.03	578.462	0.278668	0.192035	0.146742	0.251518	1728.13	679.565	0.505974	0.192991	0.00874817	0.0202381	1151.96	452.991	-0.0744079	0.192108	0.698517	0.935719
FBgn0019686	lok	2L	20061422	20064381	+	2439	272.378	111.676	212.002	86.9215	-0.372714	0.176833	0.0350551	0.0803783	152.891	62.686	-0.774287	0.187309	3.56906e-05	0.000141219	274.443	112.523	-0.00236925	0.174255	0.989152	0.999184
FBgn0019809	gcm2	2L	9608562	9612706	+	2328	0	0	0	0	NA	NA	NA	NA	0	0	NA	NA	NA	NA	0	0	NA	NA	NA	NA
FBgn0019828	dj	3R	7059315	7060524	+	1210	0	0	0	0	NA	NA	NA	NA	0	0	NA	NA	NA	NA	0	0	NA	NA	NA	NA
FBgn0019830	colt	2L	2768590	2770069	-	1480	169.166	114.302	62.6724	42.3462	-1.41292	0.234334	1.64442e-09	2.50312e-08	72.7671	49.1669	-1.2569	0.245287	2.9881e-07	1.68408e-06	121.465	82.071	-0.455161	0.223459	0.0416612	0.527791
FBgn0019890	Smg5	2L	13898828	13904661	-	5096	2527.06	495.891	2052.82	402.829	-0.30196	0.204396	0.139587	0.24159	1893.68	371.601	-0.415522	0.205396	0.0430705	0.0799205	2383.16	467.654	-0.0868312	0.204214	0.670693	0.926497
FBgn0019925	Surf4	3R	15343653	15346176	-	1641	446.418	272.04	282.06	171.883	-0.661376	0.114362	7.32983e-09	1.01199e-07	299.31	182.395	-0.608362	0.120188	4.15376e-07	2.29814e-06	545.924	332.678	0.292155	0.109437	0.00759373	0.273581
FBgn0019928	Ser8	2R	13434207	13435045	+	839	0	0	0	0	NA	NA	NA	NA	0	0	NA	NA	NA	NA	0	0	NA	NA	NA	NA
FBgn0019929	Ser7	X	9865233	9867070	+	1413	0	0	0	0	NA	NA	NA	NA	0	0	NA	NA	NA	NA	0	0	NA	NA	NA	NA
FBgn0019932	SamDC	2L	10339457	10341503	+	1224	350.634	286.465	616.831	503.947	0.810196	0.353501	0.0219103	0.0551381	607.503	496.326	0.804317	0.355194	0.0235469	0.0475824	443.064	361.98	0.33273	0.353719	0.346878	0.814457
FBgn0019936	RpS20	3R	20822181	20823356	+	564	11005.7	19513.7	4903.79	8694.67	-1.16611	0.412621	0.00471162	0.0152841	6406.99	11359.9	-0.781868	0.412733	0.0581762	0.103193	8809.91	15620.4	-0.320844	0.412548	0.436739	0.848604
FBgn0019938	RpI1	2R	14595611	14601216	-	5078	397.715	78.3212	106.86	21.0438	-1.89923	0.171889	2.2135e-28	2.82362e-26	39.9804	7.87325	-3.24494	0.211548	4.19408e-53	9.99625e-51	270.174	53.2047	-0.557924	0.161554	0.000553424	0.0661793
FBgn0019940	Rh6	3R	15483158	15484699	+	1407	3.13171	2.22581	3.00339	2.1346	-0.0933347	0.866183	0.914191	0.946737	2.11528	1.5034	-0.249497	0.936928	0.790014	0.847868	6.15281	4.373	0.895451	0.8051	0.266042	0.76804
FBgn0019949	Cdk9	2R	22636063	22637727	-	1476	201.901	136.789	440.46	298.415	1.1443	0.140346	3.53761e-16	1.31852e-14	654.722	443.579	1.70287	0.142117	4.40698e-33	3.09411e-31	169.244	114.664	-0.233506	0.145577	0.108714	0.659119
FBgn0019952	Orct	3R	24276260	24278792	+	2533	48.7676	19.2529	21.2387	8.38479	-1.21988	0.275685	9.649e-06	6.94682e-05	23.1623	9.14423	-1.04136	0.291741	0.000357704	0.00115787	42.1782	16.6515	-0.228255	0.247377	0.356162	0.816395
FBgn0019957	ND-42	3R	22027709	22029393	+	1618	332.15	205.284	271.362	167.714	-0.289975	0.161506	0.0725836	0.144971	257.08	158.888	-0.311469	0.167582	0.0630827	0.110447	343.711	212.43	0.0536377	0.159374	0.736454	0.946501
FBgn0019960	Mitofilin	3R	22019505	22023335	-	3000	1185.73	395.244	820.108	273.369	-0.533031	0.115551	3.96998e-06	3.17073e-05	703.622	234.541	-0.724726	0.119394	1.27862e-09	1.03767e-08	1148.1	382.701	-0.0473372	0.114382	0.678983	0.930128
FBgn0019968	Khc-73	2R	15515778	15532259	-	9177	349.522	38.0867	562.242	61.2664	0.676059	0.356799	0.0581206	0.121067	789.719	86.0542	1.16476	0.357718	0.00112957	0.00327585	357.253	38.9292	0.0213309	0.357248	0.952387	0.991367
FBgn0019972	Drice	3R	29799658	29801584	+	1927	350.421	181.848	473.105	245.514	0.432801	0.120156	0.000315776	0.00151002	666.396	345.821	0.927468	0.122197	3.20024e-14	4.43697e-13	344.098	178.567	-0.0278988	0.120934	0.817552	0.96273
FBgn0019982	Gs1l	2L	4455137	4456807	-	1259	66.8223	53.0757	60.9247	48.3913	-0.157879	0.267726	0.55539	0.676644	56.0629	44.5297	-0.254931	0.282567	0.366951	0.470569	63.3892	50.3489	-0.0888083	0.264387	0.736944	0.946501
FBgn0019985	mGluR	4	936819	949441	+	6351	0	0	0.230361	0.0362716	0.216781	4.40736	0.960771	NA	0.276259	0.0434985	1.06218	4.3837	0.808546	NA	0.223579	0.0352037	-0.0224149	4.40736	0.995942	NA
FBgn0019990	Gcn2	3R	31395660	31402013	+	5743	316.355	55.0853	304.554	53.0305	-0.0548886	0.181192	0.761942	0.838303	232.598	40.5012	-0.401686	0.188707	0.0332855	0.0639296	251.965	43.8734	-0.331431	0.181295	0.0675308	0.5936
FBgn0020018	Ppox	3R	24660197	24661851	-	1655	82.9661	50.1306	89.4956	54.0759	0.153331	0.299711	0.608934	0.719519	152.16	91.9399	0.872861	0.302509	0.00390908	0.0099541	82.2182	49.6787	0.0305876	0.298864	0.918482	0.984908
FBgn0020224	Cbl	3L	8424954	8432246	+	6154	486.309	79.0232	985.227	160.095	1.01679	0.214206	2.06692e-06	1.74791e-05	1480.59	240.59	1.59174	0.214934	1.30445e-13	1.69747e-12	456.288	74.145	-0.094078	0.215277	0.662104	0.923741
FBgn0020235	ATPsyngamma	3R	29747704	29749163	-	1460	1480.27	1013.88	724.332	496.118	-1.02918	0.22762	6.14129e-06	4.65843e-05	518.499	355.136	-1.48777	0.231091	1.21037e-10	1.11405e-09	1338.95	917.089	-0.142255	0.226702	0.530333	0.885972
FBgn0020236	ATPCL	2R	15993531	16001290	-	4339	856.933	197.496	954.163	219.904	0.151025	0.246512	0.540109	0.663338	979.473	225.737	0.200126	0.247962	0.419618	0.524132	1062.91	244.968	0.3067	0.246224	0.212905	0.731336
FBgn0020238	14-3-3epsilon	3R	18242531	18250550	+	3366	40250.7	11958	34871.6	10360	-0.206882	0.363574	0.56934	0.68798	44176.4	13124.3	0.13413	0.363593	0.712201	0.785199	26467	7863.04	-0.604739	0.363576	0.096251	0.641119
FBgn0020248	stet	3L	1475438	1489547	-	2550	0.365022	0.143146	0.546315	0.214241	0.177678	2.60458	0.945612	NA	0.528819	0.20738	0.718255	2.58051	0.780753	NA	0	0	-1.94597	2.67331	0.46666	NA
FBgn0020249	stck	3R	8356978	8359964	+	1583	218.524	138.044	325.026	205.323	0.579934	0.183262	0.00155348	0.0059593	362.761	229.16	0.706623	0.18741	0.000162947	0.000565014	215.322	136.021	-0.01322	0.184518	0.942883	0.98881
FBgn0020251	sfl	3L	6495680	6550104	+	5772	719.656	124.68	660.73	114.472	-0.12501	0.162437	0.441542	0.57474	995.92	172.543	0.445811	0.163723	0.00646996	0.0155557	789.187	136.727	0.13085	0.161675	0.418319	0.840523
FBgn0020255	Ran	X	11144852	11148716	-	1898	6870.25	3619.73	3414.73	1799.12	-1.008	0.282041	0.000351629	0.00165697	3333.47	1756.3	-1.04484	0.282451	0.000216294	0.000731508	5195.27	2737.24	-0.402471	0.281912	0.153393	0.69272
FBgn0020257	Ppa	2R	22684955	22688987	-	4033	372.278	92.3079	448.877	111.301	0.263367	0.379121	0.487257	0.616095	555.735	137.797	0.554159	0.380588	0.145376	0.222148	492.41	122.095	0.396677	0.378742	0.294936	0.790802
FBgn0020258	ppk	2L	14378218	14381172	-	2462	0	0	0	0	0	4.40736	1	NA	0	0	0	4.40736	1	NA	0.482516	0.195985	0.970853	4.36022	0.823799	NA
FBgn0020261	pcm	X	19485759	19492011	-	5384	304.566	56.5688	394.503	73.2732	0.36358	0.360401	0.313061	0.446097	359.586	66.7879	0.245338	0.363293	0.499474	0.59917	328.502	61.0146	0.0988917	0.360422	0.783795	0.955423
FBgn0020269	mspo	2R	14671396	14713622	-	3131	74.9903	23.9509	364.332	116.363	2.30038	0.340724	1.46379e-11	2.97254e-10	1048.11	334.752	3.81329	0.340323	3.85696e-29	2.03096e-27	98.3134	31.4	0.411154	0.34542	0.233928	0.745969
FBgn0020270	mre11	2L	11282090	11284335	+	2013	318.735	158.338	201.775	100.236	-0.647482	0.200481	0.00123945	0.00494472	156.898	77.9425	-0.973602	0.21009	3.58288e-06	1.7088e-05	281.621	139.901	-0.164559	0.197747	0.405313	0.834488
FBgn0020272	mst	X	21388977	21391533	+	2443	67.4604	27.6138	85.9026	35.1627	0.359054	0.331741	0.279106	0.409835	52.7933	21.61	-0.174215	0.348766	0.617415	0.706676	64.0763	26.2285	-0.0630648	0.332994	0.849789	0.970041
FBgn0020277	lush	3L	19604398	19606090	-	979	0	0	0.252983	0.25841	0.2168	4.40736	0.960767	NA	0	0	0	4.40736	1	NA	0	0	0	4.40736	1	NA
FBgn0020278	loco	3R	22619968	22639387	-	7671	634.392	82.7	1671.19	217.859	1.39204	0.279522	6.35558e-07	6.00861e-06	2566.04	334.512	2.00616	0.279843	7.56182e-13	8.99966e-12	577.999	75.3486	-0.139683	0.280371	0.618337	0.913906
FBgn0020279	lig	2R	8067977	8078815	+	6258	12636.8	2019.3	12119.6	1936.66	-0.0602119	0.141523	0.670504	0.769074	11758.5	1878.95	-0.105733	0.141755	0.455739	0.559299	11135.5	1779.41	-0.182379	0.141509	0.197463	0.724664
FBgn0020280	laf	3R	4876005	4878533	-	2407	0	0	0	0	NA	NA	NA	NA	0	0	NA	NA	NA	NA	0	0	NA	NA	NA	NA
FBgn0020294	ko	3L	21075581	21131159	-	4710	2.15349	0.457216	47.2026	10.0218	4.24424	0.638811	3.05348e-11	5.88412e-10	287.634	61.0687	6.81849	0.632953	4.64184e-27	2.0916e-25	2.91326	0.618527	0.216866	0.74602	0.771283	0.953792
FBgn0020299	stumps	3R	14577217	14608079	+	5599	9.14004	1.63244	55.7566	9.95831	2.54574	0.378537	1.75346e-11	3.5213e-10	68.9558	12.3157	2.80665	0.38472	2.97956e-13	3.70177e-12	14.7773	2.63927	0.624895	0.406167	0.123922	0.670486
FBgn0020300	geko	3L	18139402	18145418	+	1318	0.656758	0.498299	0.568937	0.431667	-0.517048	2.17252	0.811885	NA	1.08134	0.820438	0.790141	2.08822	0.705148	NA	0.447157	0.339269	-0.813272	2.18158	0.709304	NA
FBgn0020304	drongo	2L	833584	851071	-	4423	5078.02	1148.09	20669.8	4673.26	2.02418	0.163148	2.39269e-35	5.41765e-33	26349.5	5957.38	2.37489	0.163218	5.80887e-48	9.22999e-46	5452.95	1232.86	0.101744	0.163327	0.533319	0.887887
FBgn0020305	dbe	2L	868673	869857	-	1185	350.079	295.425	451.284	380.83	0.377721	0.181068	0.0369723	0.0839454	514.703	434.349	0.547156	0.184149	0.00296581	0.00779816	344.699	290.885	-0.00959307	0.181413	0.957828	0.992918
FBgn0020306	dom	2R	21323430	21341847	+	13020	5381.92	413.358	3628.24	278.667	-0.56969	0.249863	0.022607	0.0565612	2090.64	160.571	-1.36378	0.2508	5.39715e-08	3.45455e-07	4584.71	352.128	-0.232227	0.249761	0.352476	0.815835
FBgn0020307	dve	2R	22243963	22286469	+	4933	0.656758	0.133136	3.40493	0.690236	2.0513	1.30052	0.114728	0.207155	7.39492	1.49907	3.2865	1.28795	0.0107191	0.0241179	0.622754	0.126242	-0.321322	1.49587	0.829918	0.964108
FBgn0020309	crol	2L	11794327	11809438	-	7421	11878	1600.59	10618.8	1430.92	-0.161482	0.298711	0.588786	0.703329	11484.3	1547.54	-0.0497164	0.298816	0.867859	0.908484	9295.07	1252.54	-0.353588	0.298708	0.236521	0.749364
FBgn0020312	Tmtc3	2R	21123735	21128510	-	3572	294.037	82.3173	228.963	64.0994	-0.371805	0.199321	0.062132	0.127748	157.705	44.1504	-0.857569	0.20951	4.25426e-05	0.000165227	343.991	96.3022	0.214852	0.196646	0.274577	0.776969
FBgn0020369	Rpt6	X	21316052	21317663	+	1404	615.344	438.279	994.15	708.084	0.70193	0.202527	0.000528534	0.00235926	1495.24	1064.98	1.29274	0.203262	2.01811e-10	1.80079e-09	568.447	404.877	-0.104085	0.203175	0.608446	0.909603
FBgn0020370	TppII	2R	13152885	13159141	-	4813	1420.89	295.22	1296.35	269.343	-0.13394	0.164143	0.414502	0.548266	968.853	201.299	-0.537753	0.166672	0.0012535	0.00359725	1295.78	269.224	-0.135034	0.163937	0.410113	0.836956
FBgn0020371	Tim17b2	2L	15484729	15485545	+	817	0	0	0	0	NA	NA	NA	NA	0	0	NA	NA	NA	NA	0	0	NA	NA	NA	NA
FBgn0020372	TM4SF	2R	23878197	23880860	+	2433	1646.97	676.929	4170.32	1714.06	1.3392	0.555781	0.0159705	0.04248	2872.74	1180.74	0.802939	0.556073	0.148755	0.226495	2584.47	1062.25	0.648903	0.555824	0.243024	0.753838
FBgn0020376	Sr-CIII	2L	4120343	4121627	+	1168	0	0	1.00704	0.86219	2.05655	2.29675	0.370563	NA	1.91011	1.63537	3.14377	2.29055	0.16991	NA	0.241258	0.206557	-0.0224051	2.4737	0.992773	NA
FBgn0020377	Sr-CII	2R	12208893	12212155	-	2369	0	0	0	0	NA	NA	NA	NA	0	0	NA	NA	NA	NA	0	0	NA	NA	NA	NA
FBgn0020378	Sp1	X	9729648	9756369	+	4399	0.328379	0.0746486	0	0	-1.70677	3.11898	0.584228	NA	0.78138	0.177627	1.12711	3.01999	0.708987	NA	0.223579	0.0508249	-0.984173	3.11898	0.752349	NA
FBgn0020379	Rfx	3R	10361760	10378068	-	5557	80.9108	14.5602	92.008	16.5571	0.138663	0.262503	0.597337	0.710171	82.5478	14.8547	0.00707311	0.274395	0.979435	0.986076	81.0313	14.5818	-0.0468103	0.262038	0.858221	0.973036
FBgn0020381	Dredd	X	633622	635545	-	1708	81.2614	47.5769	87.0567	50.97	0.0713637	0.405023	0.86014	0.909655	48.839	28.5943	-0.629343	0.422664	0.13649	0.21063	95.8864	56.1396	0.212094	0.403164	0.598836	0.906414
FBgn0020385	pug	3R	10696534	10703316	+	3481	14.7557	4.23892	12.4815	3.58561	-0.206396	0.475126	0.663996	0.764241	7.67118	2.20373	-0.696952	0.528842	0.187543	0.274097	15.8438	4.55151	0.160546	0.458665	0.726317	0.945347
FBgn0020386	Pdk1	3L	129450	145895	+	6593	2071.27	314.162	2327.26	352.99	0.16651	0.260653	0.522941	0.648006	2937.51	445.55	0.497865	0.261053	0.056502	0.100597	2183.44	331.176	0.0745077	0.260606	0.774954	0.954154
FBgn0020388	Gcn5	3L	12521129	12524014	-	2770	389.294	140.539	507.254	183.124	0.370541	0.208289	0.0752437	0.149056	501.884	181.186	0.371195	0.211425	0.079143	0.133806	425.43	153.585	0.116609	0.208299	0.575605	0.90181
FBgn0020389	Papss	3L	19845293	19860925	+	3029	76.3799	25.2162	172.466	56.9383	1.12962	0.248201	5.33338e-06	4.10055e-05	181.083	59.7829	1.25348	0.253852	7.89922e-07	4.18627e-06	80.1281	26.4536	0.0229774	0.253409	0.927752	0.986687
FBgn0020391	Nrk	2R	13160063	13163484	+	3235	106.81	33.017	55.2144	17.0678	-0.970694	0.539531	0.0719959	0.144071	47.786	14.7716	-1.14109	0.552442	0.0388723	0.0730209	128.936	39.8566	0.251767	0.533562	0.637026	0.918204
FBgn0020392	Nmt	3L	8176135	8178429	-	1812	270.201	149.118	119.898	66.1691	-1.18247	0.146123	5.85505e-16	2.13827e-14	87.6308	48.3614	-1.56736	0.16236	4.74592e-22	1.4233e-20	263.73	145.547	-0.0412658	0.136073	0.76169	0.952172
FBgn0020399	Mst89B	3R	16267012	16268433	+	1287	1.05842	0.822396	0.799298	0.621055	-0.581859	1.65478	0.725122	NA	0	0	-2.23089	1.85259	0.228513	NA	0.913679	0.70993	-0.390079	1.59984	0.807368	NA
FBgn0020407	asun	3R	16264271	16266891	+	2497	92.8854	37.1988	135.494	54.2625	0.535054	0.275151	0.0518251	0.110287	94.1232	37.6945	0.11444	0.287061	0.690142	0.768361	95.111	38.0901	0.0242323	0.276635	0.930197	0.987237
FBgn0020412	JIL-1	3L	11078752	11093193	-	6634	1327.66	200.13	1502.16	226.433	0.178678	0.387915	0.645077	0.748974	3586.54	540.63	1.43068	0.387913	0.000225886	0.000761672	1136.97	171.386	-0.223171	0.387968	0.565136	0.898707
FBgn0020414	Idgf3	2L	16450907	16455194	+	3954	9939.46	2513.77	4300.59	1087.65	-1.20864	0.119452	4.58999e-24	4.28573e-22	3976.43	1005.67	-1.31963	0.120255	5.12229e-28	2.48089e-26	10360.9	2620.35	0.0598748	0.119101	0.615158	0.912367
FBgn0020415	Idgf2	2L	16447330	16450508	+	1796	159.291	88.6923	90.5443	50.4144	-0.800583	0.267581	0.00277219	0.00967543	182.396	101.557	0.137082	0.268626	0.609835	0.69968	207.763	115.681	0.391058	0.260322	0.133043	0.676224
FBgn0020416	Idgf1	2L	16445278	16446793	+	1445	16.7101	11.5641	60.4589	41.8401	1.80321	0.342633	1.41873e-07	1.50111e-06	144.366	99.9075	3.10018	0.340402	8.4384e-20	2.13482e-18	12.8489	8.89197	-0.424367	0.379913	0.26399	0.76804
FBgn0020429	GluRIIB	2L	5559342	5563502	+	2949	9.67444	3.28058	8.39453	2.84657	-0.190055	0.594758	0.749309	0.829239	5.84071	1.98057	-0.345703	0.638563	0.588247	0.680863	21.7318	7.36921	1.20189	0.555599	0.0305228	0.475555
FBgn0020440	Fak	2R	19430659	19437259	-	5619	283.06	50.3755	328.029	58.3785	0.192263	0.168291	0.25327	0.380536	357.188	63.5679	0.299079	0.172713	0.0833363	0.139748	325.944	58.0074	0.182231	0.167532	0.276711	0.777532
FBgn0020443	eRF3	2L	12434452	12441279	+	4409	4961.08	1125.22	3937.65	893.093	-0.332579	0.203039	0.10142	0.188307	4319.15	979.622	-0.203187	0.203438	0.317908	0.42015	4124.04	935.369	-0.265847	0.202971	0.190269	0.718796
FBgn0020445	E23	2L	3334875	3354829	-	5149	589.356	114.46	366.138	71.1086	-0.694578	0.246182	0.00478151	0.0154554	353.979	68.7472	-0.759903	0.250167	0.00238485	0.00640368	636.884	123.691	0.103583	0.244593	0.671936	0.926856
FBgn0020493	Dad	3R	17054007	17070408	+	3906	264.608	67.7439	172.82	44.2449	-0.625633	0.211591	0.00310838	0.0106477	161.352	41.3087	-0.811782	0.220653	0.000234156	0.000787799	275.374	70.5003	0.0457352	0.208003	0.825966	0.963903
FBgn0020496	CtBP	3R	13011649	13026275	+	6448	7999.2	1240.57	6089.36	944.379	-0.39316	0.324921	0.226273	0.349898	6658.24	1032.61	-0.265924	0.325085	0.413349	0.51773	6245.23	968.554	-0.356677	0.324896	0.272283	0.774787
FBgn0020497	emb	2L	8403573	8408853	+	4492	2262.07	503.577	2723.47	606.294	0.270602	0.105268	0.0101526	0.0292004	2279.84	507.534	0.00714014	0.106874	0.946734	0.963002	2058.15	458.182	-0.133321	0.105378	0.205811	0.729382
FBgn0020503	CLIP-190	2L	17384700	17409698	+	8115	852.134	105.007	935.651	115.299	0.127887	0.175937	0.467294	0.59904	1347.97	166.109	0.660638	0.176907	0.000188185	0.000644625	939.509	115.774	0.133636	0.175665	0.44681	0.851454
FBgn0020506	Amyrel	2R	16651095	16652699	-	1549	4.22678	2.72871	1.82896	1.18073	-1.28557	0.933931	0.168661	0.279776	0.528819	0.341394	-2.50855	1.19336	0.0355453	0.0676427	8.04752	5.1953	0.840411	0.794352	0.290064	0.786858
FBgn0020508	Ag5r2	X	14782962	14784052	-	849	0	0	0	0	NA	NA	NA	NA	0	0	NA	NA	NA	NA	0	0	NA	NA	NA	NA
FBgn0020509	Acp62F	3L	2739750	2740228	+	479	0	0	0	0	NA	NA	NA	NA	0	0	NA	NA	NA	NA	0	0	NA	NA	NA	NA
FBgn0020510	Abi	3R	14119262	14122420	-	2528	803.805	317.961	1099.06	434.755	0.447763	0.198272	0.0239257	0.059174	1061.61	419.941	0.411342	0.199972	0.0396866	0.0744032	743.562	294.131	-0.116356	0.198583	0.557921	0.896719
FBgn0020513	Paics	X	12757036	12760617	-	2550	507.187	198.897	368.15	144.372	-0.473035	0.171013	0.00567338	0.0178478	313.197	122.822	-0.673455	0.176826	0.000139769	0.000490273	532.243	208.723	0.0592559	0.169167	0.726129	0.945347
FBgn0020518	snoRNA:Me28S-G764	3L	22869545	22869622	-	78	0.656758	8.41998	0.483344	6.19672	-0.648725	2.05553	0.752306	NA	0	0	-1.64845	2.12707	0.438347	NA	1.57011	20.1296	0.986486	1.85313	0.594494	NA
FBgn0020521	pio	2R	24581245	24597862	+	3600	0	0	2.08194	0.578317	3.0957	1.53967	0.0443647	0.0973143	1.86272	0.517421	3.26257	1.58036	0.0389755	0.0731609	1.55074	0.430761	2.67243	1.55116	0.0849148	NA
FBgn0020545	kraken	2L	852768	854539	+	1320	527.883	399.912	657.108	497.809	0.314986	0.17134	0.0660074	0.133892	472.667	358.081	-0.124698	0.175932	0.478459	0.579332	666.562	504.971	0.336112	0.17092	0.0492429	0.553148
FBgn0020546	lncRNA:iab4	3R	16850004	16856497	+	6447	0	0	0	0	NA	NA	NA	NA	0	0	NA	NA	NA	NA	0	0	NA	NA	NA	NA
FBgn0020556	lncRNA:bxd	3R	16742125	16773189	-	3488	0	0	0	0	NA	NA	NA	NA	0	0	NA	NA	NA	NA	0	0	NA	NA	NA	NA
FBgn0020616	SA	2L	6950421	6954586	+	3634	1015.46	279.432	3109.04	855.541	1.61105	0.210398	1.90107e-14	5.75853e-13	2734.36	752.438	1.4309	0.211099	1.21587e-11	1.25853e-10	1345.5	370.253	0.402936	0.210798	0.0559431	0.563823
FBgn0020617	Rx	2R	20916753	20937030	+	3267	0.328379	0.100514	0.315954	0.0967108	-0.744978	3.2061	0.816256	NA	0	0	-0.913777	3.2061	0.775635	NA	0.706095	0.216129	0.558718	3.09144	0.856579	NA
FBgn0020618	Rack1	2L	7825347	7827315	-	1693	4105.77	2425.14	1645.77	972.101	-1.31827	0.234031	1.77229e-08	2.26398e-07	1909.19	1127.7	-1.11266	0.23477	2.14411e-06	1.06058e-05	3335.5	1970.17	-0.299033	0.233609	0.200525	0.726894
FBgn0020620	RN-tre	2R	13984815	13990707	-	5164	647.527	125.393	1248.65	241.8	0.939726	0.13127	8.14201e-13	1.96646e-11	1394.97	270.134	1.09738	0.132923	1.50908e-16	2.87742e-15	783.455	151.715	0.266895	0.131846	0.042941	0.531146
FBgn0020621	Pkn	2R	9252310	9285097	-	8540	487.638	57.1005	882.02	103.281	0.84721	0.313827	0.0069421	0.0211913	1243.1	145.562	1.34202	0.314491	1.9788e-05	8.21733e-05	659.092	77.1771	0.42653	0.313953	0.17428	0.704569
FBgn0020622	Pi3K21B	2L	297880	305233	+	4938	996.755	201.854	1130.4	228.918	0.180473	0.257154	0.482797	0.612277	1506.97	305.179	0.584004	0.257884	0.0235375	0.047574	896.827	181.617	-0.153539	0.257212	0.55055	0.893891
FBgn0020626	Osbp	3R	24934869	24938222	-	3248	515.846	158.819	780.958	240.443	0.597983	0.127468	2.71556e-06	2.24611e-05	994.936	306.323	0.923369	0.129422	9.70827e-13	1.14489e-11	465.736	143.392	-0.147378	0.128609	0.25182	0.760251
FBgn0020633	Mcm7	3L	8891596	8894310	+	2451	171.305	69.8917	323.21	131.868	0.918449	0.16541	2.81525e-08	3.45498e-07	268.755	109.651	0.632096	0.172309	0.000244092	0.000818004	207.163	84.522	0.278225	0.167026	0.0957623	0.641119
FBgn0020637	Lcp65Ag2	3L	6132990	6133593	-	543	0	0	0	0	NA	NA	NA	NA	0	0	NA	NA	NA	NA	0	0	NA	NA	NA	NA
FBgn0020638	Lcp65Ag1	3L	6134697	6135274	-	517	0	0	0	0	NA	NA	NA	NA	0	0	NA	NA	NA	NA	0	0	NA	NA	NA	NA
FBgn0020639	Lcp65Af	3L	6136215	6136791	-	519	0	0	0	0	NA	NA	NA	NA	0	0	NA	NA	NA	NA	0	0	NA	NA	NA	NA
FBgn0020640	Lcp65Ae	3L	6137583	6138118	-	476	0	0	0	0	NA	NA	NA	NA	0	0	NA	NA	NA	NA	0	0	NA	NA	NA	NA
FBgn0020641	Lcp65Ad	3L	6143395	6144101	+	616	0	0	0	0	0	4.40736	1	NA	0.276259	0.448472	1.0622	4.3837	0.808543	NA	0	0	0	4.40736	1	NA
FBgn0020642	Lcp65Ac	3L	6144819	6145393	+	505	0	0	0	0	0	4.40736	1	NA	0.805078	1.59421	2.10435	4.33953	0.627728	NA	0	0	0	4.40736	1	NA
FBgn0020643	Lcp65Ab2	3L	6146674	6147089	+	416	0	0	0	0	NA	NA	NA	NA	0	0	NA	NA	NA	NA	0	0	NA	NA	NA	NA
FBgn0020644	Lcp65Ab1	3L	6149548	6149960	+	413	0	0	0	0	NA	NA	NA	NA	0	0	NA	NA	NA	NA	0	0	NA	NA	NA	NA
FBgn0020645	Lcp65Aa	3L	6151304	6151803	+	500	0	0	0	0	NA	NA	NA	NA	0	0	NA	NA	NA	NA	0	0	NA	NA	NA	NA
FBgn0020646	Lcp65APsi	3L	6148353	6148615	+	263	0	0	0	0	NA	NA	NA	NA	0	0	NA	NA	NA	NA	0	0	NA	NA	NA	NA
FBgn0020647	KrT95D	3R	23997538	24031827	-	5938	210.24	35.4059	344.227	57.9702	0.692871	0.233933	0.00305811	0.0105113	455.382	76.6894	1.0771	0.236323	5.17056e-06	2.39661e-05	228.339	38.4539	0.0989988	0.234862	0.673375	0.927522
FBgn0020653	Trxr-1	X	8242528	8248033	+	2790	1182.92	423.986	607.473	217.732	-0.95645	0.172466	2.92703e-08	3.57762e-07	709.661	254.359	-0.744229	0.174832	2.0736e-05	8.56778e-05	1022.77	366.585	-0.205016	0.171139	0.230937	0.743459
FBgn0020655	ArfGAP1	3L	12415026	12417580	-	2085	278.467	133.557	394.391	189.156	0.517632	0.144388	0.000337069	0.00159834	483.102	231.704	0.808184	0.147544	4.31223e-08	2.79569e-07	324.818	155.788	0.240236	0.144494	0.0963917	0.641119
FBgn0020660	eIF4B	3L	27842669	27858271	-	1922	48.0728	25.0119	39.0008	20.2918	-0.240967	0.311894	0.439763	0.572754	29.0722	15.126	-0.715596	0.340472	0.0355731	0.0676718	52.1819	27.1498	0.17359	0.303507	0.567358	0.900113
FBgn0020762	Atet	2L	4333913	4345776	+	5244	129.399	24.6757	301.973	57.5845	1.19833	0.385049	0.00185723	0.00689663	591.502	112.796	2.16538	0.385507	1.94337e-08	1.32539e-07	223.528	42.6254	0.763776	0.385376	0.0474908	0.544688
FBgn0020764	Alas	2R	23964772	23966757	+	1842	652.984	354.497	609.299	330.781	-0.0946661	0.265582	0.721506	0.808147	679.951	369.137	0.0448885	0.267431	0.8667	0.907795	550.978	299.12	-0.239715	0.265463	0.366523	0.820131
FBgn0020765	Acp65Aa	3L	6152050	6152745	-	615	0	0	0	0	NA	NA	NA	NA	0	0	NA	NA	NA	NA	0	0	NA	NA	NA	NA
FBgn0020767	Spred	2R	14759646	14769423	-	4167	572.797	137.46	800.143	192.019	0.485209	0.26343	0.0654911	0.133024	1372.51	329.376	1.25228	0.263919	2.08578e-06	1.03399e-05	602.971	144.701	0.077259	0.263583	0.769438	0.953774
FBgn0020880	CG7179	2L	7775804	7778029	-	2226	0	0	0	0	NA	NA	NA	NA	0	0	NA	NA	NA	NA	0	0	NA	NA	NA	NA
FBgn0020887	Su(z)12	3L	19918242	19923462	-	4098	957.626	233.681	1203.97	293.794	0.334414	0.111545	0.00271736	0.00951705	1330.73	324.726	0.47288	0.1135	3.09512e-05	0.000123818	883.091	215.493	-0.113912	0.111852	0.308476	0.801286
FBgn0020906	Jon25Bi	2L	4954279	4955144	-	866	0	0	0	0	NA	NA	NA	NA	0	0	NA	NA	NA	NA	0	0	NA	NA	NA	NA
FBgn0020907	Scp2	3R	16574543	16583663	-	1283	0	0	0	0	0	4.40736	1	NA	0.276259	0.215323	1.0622	4.3837	0.808543	NA	0	0	0	4.40736	1	NA
FBgn0020908	Scp1	2R	2932595	2968052	-	1226	5.24856	4.28104	3.07125	2.5051	-0.861851	0.738257	0.243043	0.368409	5.6033	4.57039	0.0866406	0.718329	0.903997	0.932411	5.89387	4.8074	0.0471709	0.669873	0.943861	0.989048
FBgn0020909	Rtc1	X	13757179	13758598	+	1301	40.2532	30.9402	56.2366	43.2257	0.449728	0.283912	0.113184	0.204817	51.4481	39.545	0.410435	0.297619	0.167876	0.250115	54.1735	41.6399	0.398574	0.281745	0.157167	0.694727
FBgn0020910	RpL3	3R	11221894	11225173	+	2231	9384.9	4206.59	2636.86	1181.92	-1.83131	0.467026	8.8102e-05	0.000489233	4830.89	2165.35	-0.959821	0.467093	0.0398906	0.0747701	5996.28	2687.71	-0.646058	0.466884	0.166431	0.702081
FBgn0020912	Ptx1	3R	30912754	30930682	+	3571	0	0	0	0	NA	NA	NA	NA	0	0	NA	NA	NA	NA	0	0	NA	NA	NA	NA
FBgn0020930	Dgkepsilon	2R	12757546	12759724	+	2010	159.247	79.2271	118.479	58.9447	-0.438277	0.211161	0.0379348	0.085701	92.6295	46.0844	-0.688624	0.223666	0.0020783	0.00566281	162.655	80.9227	0.0176988	0.206876	0.931822	0.988271
FBgn0021738	Crg-1	X	3793223	3797339	+	1230	0.723128	0.587909	0.315954	0.256873	-0.744977	3.02235	0.805303	NA	1.37275	1.11605	0.338182	2.96785	0.909279	NA	0.241258	0.196145	-0.984174	3.02235	0.744702	NA
FBgn0021742	C901	X	10964032	10967134	-	1924	0	0	0	0	0	4.40736	1	NA	0	0	0	4.40736	1	NA	0.638748	0.331989	1.39273	4.33181	0.747822	NA
FBgn0021750	SerRS-m	3R	15340667	15343218	+	2552	185.435	72.6625	103.898	40.7123	-0.815552	0.311923	0.00893345	0.0263294	107.222	42.0148	-0.792891	0.320619	0.0133985	0.0292974	140.738	55.1482	-0.374514	0.308661	0.224996	0.736939
FBgn0021760	chb	3L	21172853	21183278	+	6205	890.381	143.494	1442.88	232.536	0.69521	0.186194	0.000188624	0.000964092	1284.71	207.044	0.525757	0.18781	0.00511973	0.012645	657.175	105.911	-0.440496	0.187068	0.0185357	0.394664
FBgn0021761	Nup154	2L	11004820	11010921	+	5420	638.414	117.788	351.378	64.8299	-0.868551	0.213326	4.67172e-05	0.000280954	192.531	35.5224	-1.70083	0.222848	2.30667e-14	3.26429e-13	662.816	122.291	0.0469525	0.211271	0.824129	0.963903
FBgn0021764	sdk	X	686834	749496	+	9565	782.156	81.7727	986.084	103.093	0.329851	0.289781	0.255005	0.382381	1303.61	136.29	0.731059	0.290529	0.0118594	0.0263713	747.201	78.1182	-0.0709442	0.289888	0.806666	0.960966
FBgn0021765	scu	X	18091259	18092853	+	1134	520.605	459.087	398.712	351.598	-0.378602	0.1891	0.0452715	0.0989202	376.759	332.239	-0.430595	0.193476	0.0260423	0.0517816	489.589	431.736	-0.0810327	0.18794	0.66635	0.925019
FBgn0021767	org-1	X	8447691	8455069	-	3417	2992.62	875.802	2407.5	704.566	-0.314957	0.366108	0.389632	0.524665	2332.43	682.596	-0.359316	0.366561	0.326971	0.429433	3901.27	1141.72	0.38141	0.365957	0.297308	0.79309
FBgn0021768	nudC	3L	16804994	16819532	+	1622	788.686	486.243	850.629	524.432	0.116579	0.242731	0.631029	0.73774	1063.58	655.724	0.438126	0.243872	0.0724089	0.124241	692.092	426.691	-0.180665	0.242777	0.456779	0.853554
FBgn0021776	mira	3R	19931799	19935120	-	3322	10.401	3.13095	5.30665	1.59743	-1.07275	0.795868	0.17769	0.290284	2.6441	0.795935	-1.72787	0.893072	0.053021	0.0952989	7.74446	2.33126	-0.519859	0.767623	0.498258	0.870965
FBgn0021795	Tapdelta	2R	11370300	11371335	-	977	905.885	927.211	315.097	322.515	-1.51986	0.210616	5.34325e-13	1.32224e-11	358.581	367.023	-1.36851	0.214501	1.77123e-10	1.59623e-09	863.288	883.611	-0.0650956	0.207705	0.753974	0.949491
FBgn0021796	Tor	2L	13004480	13013197	+	7987	551.64	69.0673	1025.97	128.455	0.889593	0.171085	1.99606e-07	2.05202e-06	1710.13	214.114	1.61747	0.171693	4.47972e-21	1.25612e-19	420.206	52.6113	-0.399219	0.172744	0.0208302	0.421243
FBgn0021800	Reph	2L	3803545	3810671	+	4890	147.103	30.0825	206.981	42.3274	0.509939	0.299117	0.0882288	0.169406	204.294	41.778	0.44583	0.304735	0.143465	0.219524	298.347	61.0117	1.03817	0.297249	0.000478359	0.0614156
FBgn0021814	Vps28	2R	8078869	8080041	-	1173	142.753	121.699	205.881	175.516	0.566801	0.173414	0.00108125	0.00441122	325.16	277.204	1.22507	0.175445	2.89698e-12	3.23525e-11	127.01	108.278	-0.129512	0.176229	0.462394	0.853554
FBgn0021825	DCTN2-p50	2R	8891832	8893339	+	1358	742.393	546.681	934.555	688.185	0.341826	0.11821	0.00383191	0.0127688	1154.39	850.065	0.643804	0.120054	8.20277e-08	5.099e-07	635.916	468.274	-0.212947	0.118804	0.0730642	0.612682
FBgn0021847	Ttc7	2R	6209782	6214122	-	3079	54.4372	17.6801	69.7918	22.667	0.30907	0.228564	0.176303	0.288644	102.834	33.3986	0.826274	0.232729	0.0003847	0.00123686	51.7345	16.8024	-0.122563	0.230971	0.595667	0.905429
FBgn0021856	l(2)k14505	2L	21261168	21262411	+	1055	183.274	173.72	164.153	155.595	-0.152753	0.196228	0.436305	0.569315	132.656	125.74	-0.382793	0.206273	0.0634884	0.110932	187.757	177.969	0.0438486	0.193947	0.821135	0.963073
FBgn0021872	Xbp1	2R	21143545	21145750	+	2142	12806.9	5978.97	6048.89	2823.94	-1.08198	0.375253	0.00393485	0.0130733	8742.38	4081.41	-0.551861	0.375332	0.141473	0.216989	8579.49	4005.37	-0.577755	0.375203	0.123598	0.670486
FBgn0021874	Nle	2L	566366	568121	-	1584	101.834	64.289	49.6953	31.3733	-1.00794	0.434281	0.0202904	0.0516934	47.6624	30.0899	-1.15665	0.449899	0.0101431	0.0230299	56.2089	35.4854	-0.826338	0.430967	0.0551864	0.56324
FBgn0021875	Zfrp8	2R	24133989	24135405	+	1306	185.127	141.751	351.997	269.523	0.913702	0.257432	0.000386273	0.00179409	305.726	234.094	0.752494	0.261843	0.0040551	0.0102848	179.117	137.15	-0.0601602	0.259423	0.816616	0.962683
FBgn0021895	ytr	2R	23847161	23851480	-	2209	4962.64	2246.56	2474.95	1120.39	-1.00238	0.102409	1.26775e-22	9.98435e-21	2052.21	929.021	-1.26555	0.104199	6.06291e-34	4.39294e-32	4548.42	2059.04	-0.1243	0.101815	0.222145	0.733186
FBgn0021906	RFeSP	2L	1612429	1614160	-	1118	1902.81	1701.98	1280.9	1145.7	-0.569826	0.185475	0.00212447	0.00773988	1085.02	970.499	-0.795111	0.187402	2.20743e-05	9.05058e-05	1658.2	1483.18	-0.196794	0.185066	0.287612	0.783525
FBgn0021944	Coprox	2L	6964421	6965887	+	1467	340.759	232.283	267.6	182.413	-0.351714	0.209597	0.0933379	0.177076	211.895	144.441	-0.627127	0.216785	0.00381757	0.00975064	465.156	317.079	0.447498	0.207034	0.0306589	0.475555
FBgn0021967	ND-PDSW	2L	3466157	3467334	+	738	451.695	612.053	219.943	298.025	-1.02751	0.234211	1.14861e-05	8.10832e-05	255.272	345.896	-0.839976	0.238833	0.00043646	0.00138556	378.32	512.628	-0.243991	0.23145	0.291798	0.787745
FBgn0021979	l(2)k09913	2R	23067196	23071875	+	2411	809.363	335.696	1388.05	575.716	0.77611	0.437209	0.0758738	0.150107	871.616	361.516	0.113495	0.438453	0.795749	0.852408	1192.58	494.64	0.557131	0.4372	0.202551	0.727507
FBgn0021995	Rs1	2R	8163564	8167769	+	2731	823.236	301.441	789.522	289.096	-0.0571193	0.175643	0.745029	0.826479	641.738	234.983	-0.351485	0.178991	0.0495642	0.0899245	806.245	295.22	-0.0260414	0.175291	0.8819	0.978078
FBgn0022023	eIF3h	2L	5051193	5053094	-	1496	5539.95	3703.18	2312.58	1545.84	-1.25985	0.383146	0.00100837	0.00414941	3227.09	2157.15	-0.782112	0.383365	0.0413382	0.0771322	4007.72	2678.96	-0.466543	0.382985	0.223157	0.734886
FBgn0022027	Vps25	2R	8625451	8626180	+	678	64.8541	95.655	65.784	97.0266	-0.0119875	0.308401	0.968994	0.981676	54.5915	80.5185	-0.126616	0.322318	0.694445	0.772297	67.6004	99.7056	0.0274185	0.30595	0.928591	0.986687
FBgn0022029	l(2)k01209	2R	17420407	17425679	+	3254	362.882	111.519	354.489	108.939	-0.0396625	0.242096	0.869865	0.916717	173.304	53.2589	-1.0071	0.25178	6.33658e-05	0.000238431	349.014	107.257	-0.0626634	0.241629	0.795375	0.958232
FBgn0022069	Nnp-1	2L	13363308	13366189	-	2882	1618.45	561.57	1373.13	476.449	-0.234627	0.186653	0.208745	0.329345	785.763	272.645	-1.03007	0.189755	5.68559e-08	3.62381e-07	1170.85	406.262	-0.464003	0.186638	0.0129148	0.34935
FBgn0022097	Vha36-1	2R	15541435	15542498	+	1064	363.495	341.631	334.122	314.024	-0.114032	0.231588	0.622443	0.731097	546.206	513.351	0.565932	0.233014	0.0151509	0.0325711	390.242	366.769	0.109869	0.230588	0.633736	0.918098
FBgn0022153	l(2)k05819	2L	4394196	4400487	+	5246	767.804	146.36	400.74	76.3896	-0.941965	0.315344	0.00281635	0.0098031	256.735	48.9392	-1.56323	0.320643	1.0864e-06	5.64517e-06	855.3	163.038	0.151044	0.314014	0.630509	0.917277
FBgn0022160	Gpo1	2R	15857752	15862755	-	2929	97.9057	33.4263	78.5332	26.8123	-0.34282	0.210435	0.103292	0.190675	94.2174	32.1671	-0.10786	0.218522	0.621598	0.709939	95.1366	32.4809	-0.0606637	0.205276	0.767595	0.95374
FBgn0022213	Cse1	2L	16821156	16825207	-	3237	1183.03	365.472	964.666	298.012	-0.29698	0.197835	0.133317	0.233442	517.346	159.823	-1.16824	0.202186	7.55708e-09	5.48873e-08	1251.7	386.686	0.0784789	0.197324	0.69084	0.932563
FBgn0022224	ubl	2R	6810011	6810530	-	396	12.0554	30.4428	12.906	32.591	0.21788	0.509604	0.668981	0.767832	14.0559	35.4946	0.48659	0.526884	0.355734	0.459678	10.3469	26.1286	-0.101001	0.511916	0.843593	0.968837
FBgn0022238	lolal	2R	18154095	18158192	-	2402	5151.52	2144.68	4287.25	1784.87	-0.264316	0.36035	0.463255	0.595666	5266.01	2192.34	0.0306531	0.360518	0.932241	0.953205	3971.05	1653.22	-0.374812	0.360333	0.298256	0.793811
FBgn0022288	l(2)09851	2R	5754517	5756327	+	1811	364.307	201.163	152.621	84.2745	-1.24635	0.300111	3.28192e-05	0.000204128	124.107	68.5298	-1.58345	0.309833	3.21054e-07	1.8016e-06	223.707	123.527	-0.692255	0.297518	0.0199777	0.409162
FBgn0022338	dnk	3R	18980995	18982749	+	1393	241.019	173.022	152.14	109.217	-0.677834	0.171443	7.69541e-05	0.000433172	85.2707	61.2137	-1.4807	0.190915	8.77817e-15	1.32286e-13	250.375	179.738	0.0458932	0.166174	0.782413	0.955423
FBgn0022343	CG3760	2R	24938181	24939769	+	1258	333.374	265.003	224.32	178.315	-0.561079	0.199297	0.00487326	0.0157184	248.134	197.245	-0.36208	0.204134	0.0761069	0.129422	341.357	271.349	0.0451591	0.196516	0.818248	0.96273
FBgn0022344	CG10340	3R	16613398	16614391	-	938	417.905	445.527	262.461	279.809	-0.664183	0.214241	0.00193405	0.00712932	253.075	269.803	-0.693312	0.219779	0.00160728	0.00450686	377.823	402.797	-0.135418	0.212178	0.523327	0.882333
[truncated: 15,563 more rows]

## Sheet: Filtered
FB gene ID	Gene Name	Chromosome	Refeq Gene Start	RefSeq Gene End	Strand	Gene Length	Ctrl Mean Normalized Count	Ctrl Mean Normalized Count per Kb	Pop2 Mean Normalized Count	Pop2 Mean Normalized Count per Kb	Pop2_v_Ctrl log2 Fold Change	Pop2_v_Ctrl log2 Fold Change StdErr	Pop2_v_Ctrl p-value	Pop2_v_Ctrl padj	Not1 Mean Normalized Count	Not1 Mean Normalized Count per Kb	Not1_v_Ctrl log2 Fold Change	Not1_v_Ctrl log2 Fold Change StdErr	Not1_v_Ctrl p-value	Not1_v_Ctrl padj	Pum Mean Normalized Count	Pum Mean Normalized Count per Kb	Pum_v_Ctrl log2 Fold Change	Pum_v_Ctrl log2 Fold Change StdErr	Pum_v_Ctrl p-value	Pum_v_Ctrl padj	non-log
FBgn0011704	RnrS	2R	11983145	11985393	-	1593	426.131	267.502	689.965	433.123	0.685609	0.193631	0.000398921	0.00184724	897.074	563.135	1.07913	0.195121	3.19217e-08	2.10572e-07	996.178	625.347	1.21635	0.192764	2.78906e-10	5.99787e-07	2.32359
FBgn0000180	bib	2L	9984645	9995538	+	3276	38.7696	11.8344	2218.75	677.275	5.75782	0.263637	9.68654e-106	8.7731e-102	3968.7	1211.45	6.59673	0.263788	5.0392e-138	4.564e-134	133.892	40.8704	1.709	0.269691	2.34461e-10	5.99787e-07	3.26934
FBgn0035696	Best2	3L	6245933	6256665	-	3547	533.851	150.508	2824.49	796.304	2.39285	0.208977	2.34401e-30	3.48028e-28	4892.78	1379.41	3.185	0.209147	2.28719e-52	5.17877e-50	1173.99	330.982	1.1264	0.209458	7.54412e-08	0.000129789	2.18314
FBgn0034611	MFS16	2R	21282298	21285679	+	2814	486.219	172.786	610.822	217.065	0.319542	0.154985	0.0392301	0.0880562	535.413	190.268	0.148857	0.158951	0.349019	0.45281	864.048	307.053	0.818968	0.153799	1.00994e-07	0.000144791	1.76414
FBgn0037110	ORMDL	3L	21635305	21636251	+	674	83.5075	123.898	71.557	106.168	-0.254493	0.256883	0.321834	0.455517	62.1026	92.1403	-0.364234	0.270693	0.178443	0.263433	197.905	293.628	1.20943	0.24627	9.06153e-07	0.000727693	2.31246
FBgn0000077	amx	X	9245915	9247336	-	1422	45.9677	32.3261	76.7616	53.9814	0.668666	0.251652	0.00788157	0.0236447	96.5771	67.9164	0.984117	0.258353	0.000139417	0.00048923	111.489	78.4031	1.21183	0.245566	8.02082e-07	0.000727693	2.31632
FBgn0265726	Nna1	X	13692292	13717835	+	8748	17.4401	1.99361	53.9797	6.17052	1.56671	0.30539	2.89432e-07	2.91914e-06	128.201	14.6549	2.83347	0.301819	6.11506e-21	1.69548e-19	51.9229	5.93541	1.50783	0.303397	6.70153e-07	0.000727693	2.84382
FBgn0053556	form3	3L	7094818	7123297	+	6298	26.4128	4.19384	736.061	116.872	4.78703	0.23817	7.49546e-90	2.26288e-86	1132.55	179.827	5.40681	0.238889	2.04486e-113	4.63008e-110	60.1344	9.54817	1.17181	0.252434	3.44961e-06	0.0024728	2.25295
FBgn0283509	Phm	2R	23985175	23988455	-	1603	797.983	497.806	421.392	262.877	-0.928145	0.167091	2.78059e-08	3.42637e-07	425.654	265.536	-0.892133	0.171166	1.86729e-07	1.0989e-06	1317.7	822.021	0.716725	0.164194	1.27059e-05	0.00575245	1.64345
FBgn0041629	Hexo2	X	8709652	8712478	+	2140	1030.57	481.575	435.416	203.465	-1.24642	0.176496	1.64086e-12	3.7815e-11	349.441	163.29	-1.59509	0.182339	2.17288e-18	4.91995e-17	1750.76	818.111	0.762725	0.173621	1.11773e-05	0.00575245	1.69669
FBgn0000427	44531	X	7867161	7873222	-	5748	16.6928	2.9041	466.727	81.1981	4.69144	0.397323	3.56529e-32	5.56738e-30	749.91	130.465	5.36727	0.398006	1.90667e-41	2.24269e-39	62.2833	10.8356	1.78725	0.40516	1.02792e-05	0.00575245	3.45156
FBgn0013272	Gp150	2R	22317662	22329416	+	4916	8348.93	1698.32	14968	3044.74	0.841469	0.195403	1.65988e-05	0.000112023	15584.2	3170.09	0.899678	0.195524	4.19726e-06	1.97274e-05	15054.1	3062.26	0.849755	0.195387	1.36712e-05	0.00587999	1.80219
FBgn0264090	CG43759	X	18930335	19028629	+	6340	35.5404	5.60574	82.8366	13.0657	1.1186	0.298211	0.000176098	0.000905692	59.5665	9.39534	0.651926	0.314812	0.038374	0.0723165	92.2355	14.5482	1.27326	0.295491	1.64008e-05	0.00641272	2.41708
FBgn0031491	alpha4GT1	2L	3021309	3023141	-	1714	203.872	118.945	182.698	106.592	-0.1663	0.236342	0.481656	0.611575	116.631	68.0462	-0.716804	0.248066	0.00385769	0.00984478	411.204	239.909	1.0029	0.232305	1.58049e-05	0.00641272	2.00402
FBgn0036999	isoQC	3L	20474466	20477003	+	2153	191.079	88.7503	159.903	74.2698	-0.264047	0.198669	0.183822	0.297991	211.713	98.3338	0.111392	0.203224	0.583605	0.676961	339.861	157.855	0.826202	0.193341	1.9261e-05	0.00720363	1.77301
FBgn0011288	Snap25	3L	24074180	24299205	+	2282	148.349	65.0084	120.969	53.01	-0.293982	0.164346	0.0736472	0.146631	86.0031	37.6876	-0.786145	0.181262	1.44401e-05	6.16904e-05	234.989	102.975	0.666386	0.156311	2.01525e-05	0.00722299	1.58709
FBgn0024245	dnt	2L	19338669	19363227	-	2639	92.5113	35.0555	103.141	39.0834	0.107238	0.252109	0.670573	0.769074	141.11	53.4709	0.548958	0.25705	0.0327116	0.062969	197.546	74.8565	1.04476	0.246092	2.18202e-05	0.00750791	2.06302
FBgn0028360	Cdc7	X	6654541	6659709	+	3103	590.886	190.424	1050.77	338.629	0.831147	0.104214	1.51895e-15	5.23086e-14	892.765	287.71	0.602675	0.107633	2.1514e-08	1.45412e-07	800.617	258.014	0.438271	0.104482	2.73231e-05	0.00842835	1.35498
FBgn0040334	Tsp3A	X	2617758	2619738	-	1798	102.233	56.8595	226.022	125.708	1.10669	0.167769	4.20934e-11	7.95907e-10	369.412	205.457	1.79565	0.169401	2.98029e-26	1.23253e-24	171.65	95.4672	0.708078	0.168586	2.66789e-05	0.00842835	1.63363
FBgn0031971	Sirup	2L	7998869	7999676	+	727	52.778	72.597	180.409	248.155	1.7873	0.225803	2.4658e-15	8.36433e-14	310.547	427.162	2.60301	0.227021	1.95538e-30	1.12802e-28	101.847	140.092	0.960951	0.229137	2.74347e-05	0.00842835	1.94659
FBgn0001085	fz	3L	14274343	14368639	+	3817	97.1508	25.4521	218.999	57.3746	1.14702	0.254617	6.64074e-06	4.98303e-05	317.568	83.1983	1.6429	0.25729	1.70943e-10	1.54979e-09	205.345	53.7975	1.05263	0.254118	3.43872e-05	0.0102	2.0743
FBgn0010473	tutl	2L	4283148	4323781	+	9888	520.525	52.6421	639.365	64.6607	0.293622	0.221033	0.184043	0.298296	1013.86	102.534	0.941143	0.221944	2.23074e-05	9.13371e-05	968.78	97.9754	0.893698	0.220159	4.92129e-05	0.0136558	1.85793
FBgn0033812	Pex13	2R	13228276	13230234	-	1768	125.907	71.2145	236.175	133.583	0.898835	0.164765	4.8899e-08	5.66341e-07	422.327	238.873	1.70126	0.165852	1.09297e-24	4.03518e-23	201.115	113.753	0.666111	0.164705	5.24858e-05	0.0136813	1.58679
FBgn0002973	numb	2L	9437469	9464184	+	4916	242.969	49.4241	557.957	113.498	1.17977	0.196443	1.90552e-09	2.87159e-08	738.637	150.252	1.56976	0.198215	2.38444e-15	3.84953e-14	424.089	86.267	0.784128	0.196714	6.71603e-05	0.0165061	1.72205
FBgn0025626	CG4281	X	2062313	2065142	-	2664	377.122	141.562	300.689	112.871	-0.338157	0.13577	0.0127507	0.035262	209.583	78.6724	-0.81111	0.145517	2.48985e-08	1.67041e-07	545.051	204.599	0.520267	0.132104	8.20611e-05	0.019608	1.43422
FBgn0036502	CG7841	3L	15505188	15508252	-	1628	96.575	59.3212	52.6239	32.3243	-0.839872	0.236609	0.000385788	0.00179276	43.4361	26.6807	-1.09389	0.257098	2.09273e-05	8.63107e-05	170.604	104.793	0.862246	0.219569	8.60125e-05	0.0199967	1.81787
FBgn0024994	Ugalt	X	2701124	2703852	-	2217	108.538	48.9573	122.024	55.0399	0.143028	0.279674	0.609065	0.71958	98.818	44.5729	-0.0728112	0.290157	0.801862	0.857338	232.8	105.007	1.07394	0.275118	9.4792e-05	0.0209077	2.10517
FBgn0027930	MP1	3R	4307908	4309835	+	1525	46.1129	30.238	29.6844	19.4652	-0.684487	0.345303	0.047448	0.102709	17.7188	11.6189	-1.16408	0.379199	0.00214164	0.00581439	114.248	74.9168	1.26083	0.323617	9.77793e-05	0.0210274	2.39633
FBgn0003079	Raf	X	2295466	2343870	+	4247	230.101	54.1796	339.313	79.8948	0.570209	0.176388	0.00122627	0.00490069	370.095	87.1428	0.645592	0.180753	0.000354692	0.00114935	362.384	85.3271	0.664957	0.175411	0.000150125	0.0293495	1.58552
FBgn0024889	Kap-alpha1	3L	19807232	19810398	+	2322	258.084	111.147	325.274	140.083	0.326656	0.211453	0.122391	0.218079	302.746	130.382	0.264724	0.216288	0.220974	0.313007	448.569	193.182	0.789719	0.209883	0.000168114	0.0314373	1.72874
FBgn0038460	CG18622	3R	16983510	16987732	-	1272	166.728	131.076	305.666	240.303	0.859082	0.374506	0.0217957	0.0548802	279.225	219.516	0.750999	0.378011	0.0469543	0.085802	447.04	351.447	1.40688	0.373478	0.000165247	0.0314373	2.65162
FBgn0003716	tkv	2L	5219000	5271384	-	4433	105.306	23.755	300.507	67.7887	1.47536	0.190823	1.06233e-14	3.36417e-13	506.616	114.283	2.20559	0.192201	1.75272e-30	1.01759e-28	178.229	40.205	0.720896	0.192844	0.000185323	0.0332114	1.64821
FBgn0040348	CG3703	X	942474	945773	-	2496	57.1638	22.9022	50.9148	20.3986	-0.168374	0.299233	0.57365	0.691298	64.6358	25.8958	0.00967687	0.310324	0.975123	0.98287	120.435	48.2513	1.06936	0.287414	0.000198729	0.0339676	2.0985
FBgn0031401	papi	2L	2220748	2225544	+	2692	639.262	237.467	438.99	163.072	-0.535996	0.148105	0.000295706	0.00143296	427.481	158.797	-0.55566	0.152591	0.000271055	0.000900236	924.517	343.431	0.540241	0.145525	0.000205338	0.0339676	1.45422
FBgn0035936	Tsp66E	3L	8912499	8932065	+	2330	152.518	65.4583	318.617	136.746	1.04037	0.180224	7.8029e-09	1.07402e-07	461.769	198.184	1.60395	0.182285	1.3791e-18	3.17825e-17	246.77	105.91	0.673159	0.180643	0.000194185	0.0339676	1.59456
FBgn0053460	CG33460	2R	15694092	15695232	+	946	548.355	579.656	281.191	297.242	-0.963162	0.144394	2.5514e-11	5.00174e-10	205.564	217.298	-1.40499	0.154201	8.12976e-20	2.06829e-18	783.565	828.293	0.516555	0.139564	0.000214575	0.0348259	1.43054
FBgn0039135	CG13603	3R	23985213	23986569	-	1046	67.7936	64.8122	153.401	146.655	1.11699	0.228309	9.95923e-07	9.02007e-06	224.643	214.764	1.65554	0.231432	8.46261e-13	1.00453e-11	126.57	121.004	0.837052	0.228498	0.000248999	0.0396647	1.7864
FBgn0039925	Kif3C	4	1147466	1169239	+	4376	15.4401	3.52836	22.7942	5.20892	0.519466	0.392451	0.18562	0.300261	11.444	2.61518	-0.239999	0.439873	0.585334	0.678098	41.593	9.50479	1.37498	0.375877	0.000254132	0.0397462	2.59364
FBgn0034405	Jheh2	2R	18855767	18858245	-	1926	229.102	118.952	117.79	61.158	-0.952339	0.199403	1.78862e-06	1.53115e-05	117.329	60.9186	-1.03937	0.210149	7.58058e-07	4.02446e-06	368.505	191.332	0.693031	0.190629	0.000277436	0.0418685	1.61668
FBgn0015766	Msr-110	3L	5566919	5577348	-	2902	1749.01	602.69	1704.01	587.185	-0.0377825	0.166644	0.820637	0.882093	3199.96	1102.67	0.866787	0.166884	2.05893e-07	1.20153e-06	2660.19	916.676	0.604651	0.166194	0.000274524	0.0418685	1.52061
FBgn0001128	Gpdh1	2L	5943643	5948968	+	3152	709.033	224.947	677.009	214.787	-0.0717803	0.174008	0.679965	0.775618	709.271	225.023	0.0170949	0.176517	0.922849	0.946478	1095.79	347.65	0.623003	0.172876	0.00031366	0.0457305	1.54008
FBgn0039045	CG17119	3R	23054410	23058958	-	1570	187.822	119.632	80.4203	51.2231	-1.23734	0.201052	7.53848e-10	1.21272e-08	85.5617	54.4979	-1.15017	0.211729	5.56372e-08	3.55114e-07	301.787	192.221	0.675119	0.187322	0.000313284	0.0457305	1.59673
FBgn0026144	CBP	X	7337352	7342731	+	2579	147.995	57.3847	320.777	124.381	1.10368	0.201344	4.2151e-08	4.95151e-07	637.473	247.179	2.07096	0.201899	1.09601e-24	4.03518e-23	246.654	95.6395	0.722027	0.20176	0.000345393	0.0479205	1.6495
FBgn0035085	CG3770	2R	24945139	24946636	+	1393	110.546	79.3582	53.5063	38.4108	-1.07006	0.235494	5.52243e-06	4.23153e-05	33.5165	24.0606	-1.66949	0.265321	3.12742e-10	2.72356e-09	190.505	136.759	0.778925	0.217916	0.000350991	0.0479242	1.71585
FBgn0002719	Men	3R	12713103	12722442	-	3074	2447.54	796.205	1022.75	332.711	-1.25696	0.219348	1.00175e-08	1.35618e-07	1971.54	641.359	-0.316563	0.219616	0.149461	0.227317	763.092	248.241	-1.67974	0.219506	1.97354e-14	1.69764e-10	0.312139
FBgn0027568	Cand1	2L	10358134	10362707	-	4120	920.042	223.311	889.708	215.948	-0.044903	0.140414	0.749127	0.829239	1099.72	266.922	0.242402	0.142186	0.0882267	0.146564	489.844	118.894	-0.906456	0.141583	1.53073e-10	5.99787e-07	0.533494
FBgn0016756	Usp47	3L	5752973	5761886	+	5636	2753.17	488.497	1758.35	311.985	-0.645218	0.0841885	1.80279e-14	5.54656e-13	1517.29	269.214	-0.86139	0.0867855	3.22473e-23	1.06205e-21	2065.89	366.553	-0.413461	0.0836587	7.7233e-07	0.000727693	0.75082
FBgn0041789	Pax	2L	19400753	19426596	-	4199	2193.29	522.336	5759.72	1371.69	1.39455	0.0903761	1.02131e-53	7.70837e-51	5644.33	1344.21	1.368	0.0910829	5.48838e-51	1.18353e-48	1604.81	382.189	-0.448609	0.0914449	9.30553e-07	0.000727693	0.732749
FBgn0284253	LeuRS	2L	3510328	3514656	-	3934	606.172	154.085	363.515	92.4034	-0.728572	0.164162	9.07477e-06	6.59632e-05	349.417	88.8197	-0.819664	0.169498	1.32598e-06	6.78383e-06	358.296	91.0768	-0.748766	0.163486	4.64997e-06	0.00307685	0.595112
FBgn0003165	pum	3R	9066343	9237682	-	11798	1754.78	148.735	1894.2	160.553	0.110966	0.385808	0.773638	0.845603	4706.85	398.953	1.42151	0.385792	0.00022902	0.000771377	542.625	45.9929	-1.69262	0.386543	1.19299e-05	0.00575245	0.309365
FBgn0013469	klu	3L	10981171	11009188	-	4792	115.199	24.0398	4.09981	0.855553	-4.84106	0.501868	5.10724e-22	3.92002e-20	4.07939	0.851292	-5.43629	0.643069	2.8228e-17	5.85036e-16	38.6632	8.06828	-1.5574	0.354993	1.14853e-05	0.00575245	0.339763
FBgn0267385	PyK	3R	22367536	22372746	+	2242	1996.43	890.469	1150.8	513.29	-0.793218	0.0972023	3.33679e-16	1.26301e-14	849.139	378.742	-1.23922	0.101401	2.40203e-34	1.79795e-32	1488.55	663.94	-0.421322	0.0963351	1.2227e-05	0.00575245	0.74674
FBgn0264987	lncRNA:CR44138	3R	13376903	13377395	+	493	139.592	283.148	28.8667	58.5531	-2.24428	0.337397	2.89661e-11	5.62975e-10	18.1978	36.9124	-2.96426	0.382508	9.22397e-15	1.38543e-13	55.1128	111.791	-1.316	0.321311	4.20889e-05	0.0120683	0.401648
FBgn0031266	Sf3b1	2L	568340	572907	+	4346	693.501	159.572	611.346	140.669	-0.173528	0.175954	0.324027	0.457763	672.431	154.724	-0.0537132	0.178566	0.763565	0.827028	420.143	96.6735	-0.715093	0.176533	5.10525e-05	0.0136813	0.609166
FBgn0267758	asRNA:CR46089	3R	23052916	23057984	+	5069	43.4983	8.58124	15.6575	3.08888	-1.44628	0.348796	3.37592e-05	0.000209566	7.21346	1.42305	-2.39554	0.431953	2.9256e-08	1.93976e-07	16.7718	3.3087	-1.3627	0.338689	5.73508e-05	0.0145097	0.388854
FBgn0266669	Sec3	3L	17421787	17425217	-	3109	353.439	113.683	415.634	133.688	0.250939	0.150552	0.0955561	0.179979	336.117	108.111	-0.0403984	0.156703	0.79656	0.853073	230.942	74.2816	-0.597496	0.152822	9.23946e-05	0.0209077	0.6609
FBgn0037810	sle	3R	10333115	10338265	+	4875	7013.81	1438.73	3214.38	659.361	-1.12554	0.118811	2.70932e-21	1.91257e-19	1295.99	265.843	-2.4447	0.122	2.5431e-89	3.2904e-86	5127.5	1051.79	-0.451872	0.118468	0.000136565	0.0279697	0.731094
[truncated: 8,549 more rows]

## Sheet: Pum Upregulated PRE
Significantly Upregulated PRE containing genes	Gene name	Flybase	functions	PRE: 5'UTR	PRE: CDS	PRE: 3'UTR
FBgn0000077	amx	https://flybase.org/reports/FBgn0000077	neurodevelopment, Notch pathway	0	0	2
[truncated: 30 more rows]
