# Supplementary material
Source: HighWire-hosted journal article supplement (doi:10.1101/rna.079813.123)
Supplement: Supplemental_TableS3.xlsx [file Supplemental_TableS3.xlsx]

## Sheet: WT_vs_KO1_KO2_DESeq2_res
FB gene ID	Gene Name	Chromosome	Refeq Gene Start	RefSeq Gene End	Strand	Gene Length	WT Mean Normalized Count	WT Mean Normalized Count per Kb	KO1 Mean Normalized Count	KO1 Mean Normalized Count per Kb	KO1_v_WT log2 Fold Change	KO1_v_WT log2 Fold Change StdErr	KO1_v_WT p-value	KO1_v_WT padj	KO2 Mean Normalized Count	KO2 Mean Normalized Count per Kb	KO2_v_WT log2 Fold Change	KO2_v_WT log2 Fold Change StdErr	KO2_v_WT p-value	KO2_v_WT padj
FBgn0000003	7SLRNA:CR32864	3R	6822500	6822798	+	299	0	0	0	0	NA	NA	NA	NA	0	0	NA	NA	NA	NA
FBgn0000008	a	2R	22136968	22172834	+	5414	60.7677	11.2242	112.498	20.7792	0.894446	0.202316	9.82298e-06	3.62363e-05	142.449	26.3112	1.24511	0.201856	6.90217e-10	4.8931e-09
FBgn0000014	abd-A	3R	16807214	16830049	-	5477	0.857251	0.156518	0	0	-2.49598	3.36552	0.458311	NA	0	0	-2.19084	3.36556	0.515074	NA
FBgn0000015	Abd-B	3R	16927212	16972236	-	11791	2.43858	0.206817	2.31546	0.196375	0.0440322	1.05957	0.966852	0.979282	4.93069	0.418174	1.04388	1.01758	0.304966	0.437452
FBgn0000017	Abl	3L	16615866	16647882	-	12819	3059.24	238.649	1695.58	132.271	-0.852838	0.0856474	2.33782e-23	3.43838e-22	1532.33	119.536	-0.998811	0.0863341	5.90815e-31	1.72588e-29
FBgn0000018	abo	2L	10973443	10975293	-	1794	106.169	59.1798	124.79	69.5594	0.218975	0.190955	0.251489	0.363724	112.835	62.896	0.0746058	0.195175	0.702275	0.793447
FBgn0000022	ac	X	370031	370947	+	917	0.365555	0.398643	0.253458	0.276399	-0.562883	2.66587	0.832775	NA	0.634146	0.691545	0.584178	2.60787	0.822753	NA
FBgn0000024	Ace	3R	13222951	13259517	-	8473	4.49755	0.530809	0.932206	0.110021	-2.39461	1.33006	0.071801	0.12829	0.928759	0.109614	-2.19388	1.34949	0.104011	0.186637
FBgn0000028	acj6	X	15350239	15379064	-	4433	6.44443	1.45374	2.03532	0.45913	-1.60471	0.822179	0.0509645	0.0955984	7.73001	1.74374	0.270143	0.706851	0.702329	0.793447
FBgn0000032	Acph-1	3R	29991144	29993411	-	2024	867.078	428.398	579.296	286.213	-0.579325	0.12344	2.69005e-06	1.07422e-05	486.078	240.157	-0.837365	0.125262	2.31029e-11	1.8901e-10
FBgn0000036	nAChRalpha1	3R	24393896	24457157	-	11027	9.30679	0.844	0	0	-5.9775	1.48856	5.92855e-05	0.000196132	0	0	-5.67234	1.48856	0.000138618	0.000497922
FBgn0000037	mAChR-A	2R	24378630	24390294	-	5425	1.09667	0.20215	0.475613	0.0876706	-1.15858	1.81859	0.524073	0.638345	1.96812	0.362788	0.788834	1.60526	0.623139	0.735824
FBgn0000038	nAChRbeta1	3L	4429349	4435993	+	2974	0.724079	0.24347	0.253458	0.0852245	-1.36372	2.55582	0.593636	NA	0.37527	0.126184	-1.05856	2.55584	0.678748	NA
FBgn0000039	nAChRalpha2	3R	24485428	24491147	+	2387	0.365555	0.153144	0	0	-1.52464	4.08046	0.708668	NA	0	0	-1.21951	4.08052	0.765046	NA
FBgn0000042	Act5C	X	5900861	5905399	+	2978	82426.6	27678.5	68009.7	22837.4	-0.27746	0.0684358	5.02809e-05	0.000168426	62179.4	20879.6	-0.40671	0.0684562	2.82977e-09	1.88247e-08
FBgn0000043	Act42A	2R	6013910	6015689	-	1626	11970.7	7362.07	4858.69	2988.13	-1.29987	0.0610677	1.53993e-100	1.77845e-98	4843.43	2978.74	-1.30552	0.0612828	1.06118e-100	2.50944e-98
FBgn0000044	Act57B	2R	20944021	20946431	+	1724	16.403	9.51451	3.74784	2.17392	-2.1962	0.665365	0.000964287	0.0026401	3.99274	2.31598	-2.03145	0.677695	0.00272125	0.00763271
FBgn0000045	Act79B	3L	21985210	21987190	+	1619	7.14158	4.41111	1.85213	1.144	-1.97133	0.970107	0.0421459	0.0810307	2.04878	1.26546	-1.84491	0.990786	0.0625929	0.121992
FBgn0000046	Act87E	3R	13425983	13428375	+	1989	8.98806	4.51888	3.38516	1.70194	-1.43533	0.744682	0.0539252	0.100448	6.76212	3.39976	-0.400479	0.697602	0.565914	0.685865
FBgn0000047	Act88F	3R	15439969	15442177	+	1595	6.89514	4.32297	5.39684	3.3836	-0.389038	0.70426	0.58067	0.687403	5.12774	3.21488	-0.469118	0.726647	0.518543	0.64587
FBgn0000052	Pfas	2L	6041181	6046050	-	4434	972.362	219.297	856.617	193.193	-0.181077	0.078208	0.0205952	0.0432725	932.307	210.263	-0.061483	0.0787465	0.434937	0.570579
FBgn0000053	Gart	2L	7014623	7023898	-	4780	582.949	121.956	750.718	157.054	0.361167	0.0893779	5.32469e-05	0.000177542	787.116	164.669	0.432089	0.0900791	1.61242e-06	7.69189e-06
FBgn0000055	Adh	2L	14615552	14618902	+	2254	0	0	0	0	NA	NA	NA	NA	0	0	NA	NA	NA	NA
FBgn0000056	Adhr	2L	14615552	14618902	+	2116	0	0	0	0	NA	NA	NA	NA	0	0	NA	NA	NA	NA
FBgn0000057	adp	2R	18151704	18154060	+	2291	287.916	125.672	270.417	118.035	-0.0880666	0.115812	0.447001	0.567896	253.46	110.633	-0.1807	0.11859	0.127574	0.220091
FBgn0000061	al	2L	378112	387439	+	1806	0.358524	0.198518	0	0	-1.52465	3.70409	0.680624	NA	0.32456	0.179712	-0.257722	3.70414	0.944531	NA
FBgn0000063	Mps1	3R	17671271	17673828	+	2141	235.932	110.197	303.701	141.85	0.367135	0.118614	0.0019667	0.00510147	291.898	136.337	0.303257	0.120822	0.0120744	0.028918
FBgn0000064	Ald1	3R	26254069	26261591	-	3809	8268.02	2170.65	4260.05	1118.42	-0.957312	0.0782277	1.95963e-34	4.8813e-33	6036.44	1584.78	-0.453486	0.0781053	6.39486e-09	4.10295e-08
FBgn0000071	Ama	3R	6762593	6765261	+	1946	0.358524	0.184236	0	0	-1.52465	3.60779	0.672588	NA	0.37527	0.192842	-0.257722	3.60784	0.943052	NA
FBgn0000075	amd	2L	19110154	19114110	+	2224	0	0	0.608483	0.273598	1.41855	3.04759	0.641597	NA	0.309586	0.139203	0.70407	3.11607	0.821242	NA
FBgn0000077	amx	X	9245915	9247336	-	1422	88.4595	62.2078	170.516	119.913	0.944286	0.172595	4.47201e-08	2.19455e-07	189.665	133.379	1.10981	0.173508	1.59151e-10	1.19658e-09
FBgn0000078	Amy-d	2R	17124764	17126369	+	1606	7.88556	4.91006	4.66011	2.90168	-0.780013	0.75476	0.301389	0.419189	1.30403	0.811973	-2.5733	0.985444	0.00901966	0.0223233
FBgn0000079	Amy-p	2R	17118636	17120303	-	1668	71.1301	42.644	51.5177	30.8859	-0.476903	0.250254	0.0566927	0.104853	30.5848	18.3362	-1.21298	0.272512	8.54233e-06	3.71366e-05
FBgn0000083	AnxB9	3R	21065241	21070917	+	2073	2611.4	1259.72	1464.14	706.292	-0.834049	0.0917733	1.00747e-19	1.18919e-18	1570.36	757.529	-0.732755	0.092064	1.7317e-15	2.00926e-14
FBgn0000084	AnxB10	X	20171445	20173514	-	1247	161.667	129.645	128.645	103.164	-0.318073	0.190616	0.0951861	0.163408	192.821	154.628	0.262223	0.188512	0.16422	0.269413
FBgn0000092	dyw	X	2692732	2693886	-	1013	4.37141	4.31531	3.163	3.12241	-0.514858	0.9047	0.569293	0.6782	5.19921	5.13249	0.230359	0.877357	0.792889	0.86235
FBgn0000094	Anp	3R	30209948	30210382	+	373	0	0	0	0	0	4.08046	1	NA	0.309586	0.82999	0.704067	4.08052	0.86301	NA
FBgn0000097	aop	2L	2156484	2178754	-	5454	1854.5	340.025	4038.55	740.475	1.12102	0.0689668	2.07807e-59	1.16041e-57	3884.63	712.254	1.06599	0.0692401	1.75376e-53	1.27141e-51
FBgn0000100	RpLP0	3L	22075867	22077487	+	1328	2639.12	1987.29	3449.7	2597.67	0.386891	0.0783793	7.96852e-07	3.39983e-06	3859.54	2906.28	0.547641	0.078474	2.98077e-12	2.65754e-11
FBgn0000108	Appl	X	530501	579044	+	6383	522.885	81.9184	107.068	16.7739	-2.29961	0.13526	8.02044e-65	5.03159e-63	157.059	24.6059	-1.7341	0.131977	1.95836e-39	8.31214e-38
FBgn0000109	Aprt	3L	1883795	1885019	-	1021	113.39	111.058	101.475	99.3881	-0.16358	0.179291	0.361575	0.483512	131.486	128.782	0.20983	0.178509	0.239812	0.361978
FBgn0000114	bru1	2L	12175004	12313438	+	7791	36.547	4.69093	7.50704	0.963553	-2.29491	0.475586	1.39695e-06	5.79004e-06	7.32479	0.94016	-2.29203	0.494225	3.52432e-06	1.61979e-05
FBgn0000115	Arl1	3L	15983135	15984362	+	863	969.221	1123.08	1027.35	1190.44	0.0850796	0.11004	0.439421	0.561105	916.766	1062.3	-0.080035	0.110966	0.47075	0.603678
FBgn0000116	Argk	3L	9048781	9066027	-	3504	8.01873	2.28845	0.919924	0.262535	-2.95881	1.02897	0.00403391	0.00986919	4.05843	1.15823	-0.985748	0.828871	0.234335	0.356038
FBgn0000117	arm	X	1891401	1900646	-	3564	6978.4	1958.03	7123.18	1998.65	0.0290543	0.0647716	0.653746	0.748875	7139.93	2003.35	0.0324509	0.0649049	0.617092	0.730507
FBgn0000119	arr	2R	13453640	13483229	-	6024	454.459	75.4415	634.113	105.264	0.47668	0.132598	0.00032449	0.000958103	597.057	99.1131	0.389662	0.133603	0.00353901	0.0096485
FBgn0000120	Arr1	2L	18078269	18081307	+	2476	0	0	0	0	NA	NA	NA	NA	0	0	NA	NA	NA	NA
FBgn0000121	Arr2	3L	8647261	8648936	-	1547	2.17224	1.40416	3.03013	1.95871	0.38782	1.08938	0.72184	0.803864	2.76937	1.79016	0.251114	1.11961	0.822534	0.884624
FBgn0000137	ase	X	460747	463176	+	2430	0	0	0	0	0	4.08046	1	NA	0.32456	0.133564	0.704067	4.08052	0.86301	NA
FBgn0000139	ash2	3R	24650125	24653376	+	2235	515.76	230.765	416.263	186.248	-0.305279	0.0959111	0.00145791	0.00386356	399.206	178.616	-0.371202	0.097914	0.000149978	0.000535436
FBgn0000140	asp	3R	24753849	24760513	+	6338	1073.51	169.377	2125.63	335.379	0.985194	0.0792988	1.94078e-35	5.01886e-34	1686.58	266.107	0.650242	0.0802079	5.19042e-16	6.27908e-15
FBgn0000146	aub	2L	10997819	11001476	-	3015	889.359	294.978	55.0961	18.274	-4.03099	0.15014	8.86913e-159	3.00457e-156	306.017	101.498	-1.53451	0.120377	3.2164e-37	1.27272e-35
FBgn0000147	aurA	3R	11963124	11964826	+	1577	223.724	141.867	206.805	131.138	-0.116197	0.125869	0.355925	0.477401	185.496	117.626	-0.274306	0.12987	0.0346731	0.0729759
FBgn0000150	awd	3R	31745172	31746077	-	727	1214.68	1670.82	2292.67	3153.6	0.918606	0.0910956	6.50409e-24	9.89537e-23	2406.08	3309.6	0.988426	0.091316	2.6426e-27	6.41719e-26
FBgn0000152	Axs	X	16680089	16683895	-	2575	182.309	70.7995	131.939	51.2385	-0.460617	0.154381	0.00284842	0.00716016	145.842	56.6376	-0.312986	0.155915	0.0447046	0.0911717
FBgn0000153	b	2L	13821248	13823979	+	2135	5.55203	2.60048	0.932206	0.43663	-2.71535	1.29327	0.0357645	0.0701959	2.08452	0.976354	-1.4381	1.16106	0.21549	0.333125
FBgn0000157	Dll	2R	24814822	24835667	+	3309	6.80999	2.05802	0.71005	0.214581	-3.5669	1.33003	0.00732224	0.0170133	1.45037	0.438311	-2.29827	1.13926	0.0436606	0.0892698
FBgn0000158	bam	3R	25243039	25245109	-	1946	1.94689	1.00046	1.18566	0.609282	-0.81485	1.35192	0.546684	0.658053	1.70925	0.878338	-0.218126	1.31758	0.868511	0.913601
FBgn0000163	baz	X	17160006	17200728	+	10881	305.423	28.0694	364.063	33.4586	0.242192	0.118896	0.0416492	0.0802123	406.064	37.3186	0.403218	0.119527	0.000742321	0.00233832
FBgn0000166	bcd	3R	6755842	6759466	-	2536	0	0	0	0	NA	NA	NA	NA	0	0	NA	NA	NA	NA
FBgn0000173	ben	X	13996345	13999805	+	2072	3760.41	1814.87	3977.53	1919.66	0.0806258	0.0757552	0.287196	0.404486	4336.54	2092.93	0.206086	0.0758658	0.00659848	0.0169082
FBgn0000179	bi	X	4412856	4485647	+	6095	0.717048	0.117645	0	0	-2.30814	2.77203	0.40504	0.527071	0.97368	0.159751	0.403223	2.64756	0.878951	NA
FBgn0000180	bib	2L	9984645	9995538	+	3276	209.865	64.0614	505.591	154.332	1.25824	0.148386	2.26089e-17	2.28858e-16	445.847	136.095	1.0822	0.149827	5.08615e-13	4.83404e-12
FBgn0000181	bic	2R	12870249	12871794	+	1546	12434.6	8043.07	20347	13161.1	0.710201	0.0853815	8.94836e-17	8.66942e-16	22395.1	14485.8	0.84882	0.0853988	2.80278e-23	5.50142e-22
FBgn0000182	BicC	2L	16042047	16048757	+	4547	0	0	0	0	NA	NA	NA	NA	0	0	NA	NA	NA	NA
FBgn0000183	BicD	2L	17459605	17473215	-	5498	2562.47	466.074	2548.24	463.484	-0.009014	0.0809399	0.911326	0.942759	2630.35	478.419	0.0373315	0.0811897	0.645656	0.753632
FBgn0000206	boss	3R	25961994	25966948	+	3013	0	0	0	0	NA	NA	NA	NA	0	0	NA	NA	NA	NA
FBgn0000212	brm	3L	15970082	15982869	-	5597	3073.76	549.18	5135.65	917.572	0.740013	0.0738421	1.22557e-23	1.83981e-22	4680.01	836.163	0.605799	0.0740962	2.93809e-16	3.62125e-15
FBgn0000216	Brd	3L	14972667	14973198	+	532	0	0	0	0	NA	NA	NA	NA	0	0	NA	NA	NA	NA
FBgn0000221	brn	X	4104342	4105791	+	1450	217.804	150.209	166.588	114.888	-0.388209	0.138926	0.00520041	0.0124533	175.972	121.36	-0.309517	0.140926	0.0280702	0.0608586
FBgn0000227	Bsg25A	2L	4683052	4684461	-	1352	0	0	0	0	NA	NA	NA	NA	0	0	NA	NA	NA	NA
FBgn0000228	Bsg25D	2L	5271728	5278548	-	4953	685.099	138.32	792.511	160.006	0.207065	0.0884804	0.0192716	0.0407951	739.156	149.234	0.107793	0.0897383	0.229677	0.350085
FBgn0000229	bsk	2L	10247502	10250501	-	2018	2325.54	1152.4	2186.32	1083.41	-0.0882145	0.0814498	0.278785	0.395274	1905.76	944.382	-0.285103	0.0820868	0.000514311	0.00166824
FBgn0000233	btd	X	9694186	9697558	+	2934	0	0	0.355025	0.121004	0.398902	4.08046	0.922124	NA	0	0	0	4.08052	1	NA
FBgn0000239	bur	2L	21174182	21179683	-	3116	1752.07	562.282	1632.01	523.753	-0.10212	0.0743914	0.169833	0.265378	1471.24	472.156	-0.253915	0.0752255	0.000737143	0.00232422
FBgn0000241	bw	2R	23527805	23538499	-	2738	1.58133	0.57755	0.932206	0.34047	-0.864706	1.71972	0.615092	0.717746	0.309586	0.11307	-2.13594	1.92195	0.266423	0.392889
FBgn0000244	by	3R	9528238	9533011	-	4774	108.46	22.719	70.517	14.771	-0.614746	0.194685	0.0015905	0.00419307	114.26	23.9337	0.0636417	0.189941	0.737579	0.821812
FBgn0000246	c(3)G	3R	15789473	15792579	-	2629	354.636	134.894	268.04	101.955	-0.40649	0.135153	0.0026329	0.00666952	237.245	90.2414	-0.587015	0.138166	2.15088e-05	8.74799e-05
FBgn0000247	ca	3R	29806811	29815047	+	7026	728.564	103.695	789.209	112.327	0.11244	0.0867932	0.19515	0.298153	746.737	106.282	0.030875	0.0880121	0.725735	0.811438
FBgn0000250	cact	2L	16313036	16326207	-	3324	2293.12	689.869	3832.5	1152.98	0.741937	0.0698117	2.21537e-26	3.82254e-25	3094.32	930.903	0.432694	0.0703559	7.74472e-10	5.43992e-09
FBgn0000251	cad	2L	20770731	20783135	+	2570	4.8842	1.90047	0	0	-5.01929	1.67945	0.00280209	0.00705242	0.928759	0.361385	-2.32654	1.46752	0.112885	0.199747
FBgn0000253	Cam	2R	12259398	12278809	+	5812	35523.7	6112.13	43602	7502.07	0.295536	0.0718503	3.90178e-05	0.000132577	41264.7	7099.91	0.216115	0.0718764	0.00264048	0.00742294
FBgn0000256	capu	2L	3872646	3902860	-	6240	495.316	79.3776	168.051	26.9312	-1.55848	0.112748	1.85999e-43	6.4959e-42	269.763	43.2312	-0.880084	0.109295	8.11984e-16	9.65824e-15
FBgn0000257	car	X	19566019	19569401	+	3205	157.453	49.1273	150.507	46.96	-0.063038	0.156039	0.686221	0.775794	154.496	48.2046	-0.0343128	0.15848	0.828589	0.888336
FBgn0000259	CkIIbeta	X	11792533	11801587	+	5705	8394.52	1471.43	8330.87	1460.28	-0.0114586	0.0951603	0.904155	0.937837	8155.89	1429.6	-0.0419839	0.0952481	0.659369	0.762825
FBgn0000261	Cat	3L	18822604	18828188	+	1993	599.729	300.918	570.821	286.413	-0.0703609	0.10497	0.502668	0.620216	716.236	359.376	0.255227	0.104856	0.0149298	0.0349395
FBgn0000273	Pka-C1	2L	9682315	9699297	-	5725	5165.42	902.257	5707.95	997.021	0.143098	0.0709029	0.0435674	0.0833068	5545.8	968.698	0.101804	0.071082	0.152087	0.253377
FBgn0000274	Pka-C2	3R	30695537	30697138	-	1349	0	0	0	0	NA	NA	NA	NA	0	0	NA	NA	NA	NA
FBgn0000276	CecA1	3R	30210874	30211273	+	339	1.22281	3.6071	2.15591	6.35962	0.880351	1.59181	0.58023	0.686962	0.64912	1.91481	-0.869199	1.82551	0.633975	0.7449
FBgn0000277	CecA2	3R	30212156	30212568	+	355	0.358524	1.00993	0	0	-1.52464	4.08046	0.708668	NA	0	0	-1.21951	4.08052	0.765046	NA
FBgn0000278	CecB	3R	30213315	30213797	-	425	0.85022	2.00052	5.26397	12.3858	2.71819	1.25485	0.0302999	0.0607972	5.02632	11.8266	2.64585	1.2673	0.0368182	0.0769201
FBgn0000279	CecC	3R	30216484	30216938	+	386	49.1763	127.4	75.3781	195.28	0.6126	0.230066	0.00775136	0.0179104	52.195	135.22	0.07326	0.242559	0.762629	0.841043
FBgn0000280	Cec-Psi1	3R	30211527	30211753	+	166	0	0	0	0	NA	NA	NA	NA	0	0	NA	NA	NA	NA
FBgn0000281	Cec2	3R	30212903	30213142	+	201	0.358524	1.7837	0	0	-1.52464	4.08046	0.708668	NA	0	0	-1.21951	4.08052	0.765046	NA
FBgn0000283	Cp190	3R	15270432	15275241	-	4293	3374.81	786.119	6706.21	1562.13	0.989618	0.0584626	2.82695e-64	1.7626e-62	5909.61	1376.57	0.80745	0.0587415	5.39504e-43	2.76204e-41
FBgn0000286	Cf2	2L	4876891	4883107	-	4315	755.815	175.16	749.545	173.707	-0.0159619	0.1236	0.897245	0.932478	847.519	196.412	0.167385	0.12383	0.17646	0.284402
FBgn0000287	salr	2L	11358873	11373636	+	5536	0.365555	0.0660324	0	0	-1.52467	2.25317	0.498611	0.61647	2.01883	0.364673	2.22576	2.00902	0.267912	0.394558
FBgn0000289	cg	2R	14173693	14182838	+	5429	1852.81	341.281	2981	549.088	0.684123	0.0617699	1.65239e-28	3.1987e-27	2519.07	464.003	0.441639	0.0624558	1.53559e-12	1.3941e-11
FBgn0000299	Col4a1	2L	5029609	5037279	+	6165	67.4137	10.9349	188.055	30.5036	1.4656	0.167417	2.05537e-18	2.21984e-17	440.557	71.4609	2.69977	0.163026	1.34703e-61	1.33787e-59
FBgn0000303	ChAT	3R	18705501	18732344	+	4011	0.365555	0.0911382	0	0	-1.52466	2.97391	0.608177	NA	0.684856	0.170745	0.658799	2.9128	0.821066	NA
FBgn0000307	chif	2L	16342430	16352628	-	7747	6257.97	807.792	9797.84	1264.73	0.64621	0.0886592	3.12956e-13	2.37711e-12	8491.31	1096.08	0.439848	0.0887926	7.28335e-07	3.62234e-06
FBgn0000308	chic	2L	5972115	5981018	-	2632	39987.9	15193	39940.6	15175	-0.00182075	0.0669183	0.978293	0.986251	37052.3	14077.6	-0.110062	0.0669517	0.100198	0.181104
FBgn0000316	cin	X	255674	258469	+	2110	418.099	198.151	557.989	264.45	0.421852	0.0993425	2.1719e-05	7.64568e-05	523.835	248.263	0.328683	0.100903	0.00112428	0.00340853
FBgn0000317	ck	2L	15044963	15057862	-	7404	762.546	102.991	632.582	85.4378	-0.270631	0.0980395	0.00577262	0.0137009	601.805	81.2811	-0.343635	0.09935	0.000542513	0.0017517
FBgn0000318	cl	2L	5520135	5521382	+	716	5509.89	7695.38	3647.46	5094.22	-0.595062	0.0724459	2.14166e-16	2.01721e-15	3792.86	5297.3	-0.538255	0.0726313	1.25557e-13	1.25709e-12
FBgn0000319	Chc	X	15827986	15835490	-	6008	6055.19	1007.85	4466.66	743.451	-0.439537	0.0568001	1.00745e-14	8.51808e-14	4848.45	806.999	-0.32128	0.0569388	1.67537e-08	1.02273e-07
FBgn0000320	eya	2L	6527447	6546976	-	3690	0.85022	0.230412	0.932206	0.25263	0.106738	2.24742	0.96212	0.976046	0	0	-2.16083	2.40811	0.369552	NA
FBgn0000326	clt	2R	21617061	21619079	-	1844	312.287	169.353	189.238	102.623	-0.713128	0.13223	6.92512e-08	3.33713e-07	232.969	126.339	-0.420769	0.132273	0.00146729	0.00436713
FBgn0000330	cm	X	7009006	7011145	-	1774	96.8986	54.6215	73.1728	41.2473	-0.416929	0.202094	0.0391087	0.0758949	82.0481	46.2504	-0.251272	0.203964	0.217972	0.335642
FBgn0000337	cn	2R	7782797	7785067	-	1790	1.0826	0.604806	0.475613	0.265706	-1.14721	2.12701	0.589644	0.69495	0.309586	0.172953	-1.64052	2.19425	0.454675	0.589227
FBgn0000339	cni	2L	16309292	16310726	-	1182	270.708	229.025	260.921	220.745	-0.0519767	0.11852	0.66099	0.754622	298.908	252.884	0.145101	0.119182	0.223424	0.342234
FBgn0000346	comt	X	13259021	13262488	+	3087	99.5965	32.2632	85.1748	27.5915	-0.232494	0.196609	0.236999	0.346365	89.129	28.8724	-0.162742	0.199506	0.414655	0.549969
FBgn0000351	cort	2L	6674682	6676635	-	1655	21.8558	13.2059	30.7594	18.5857	0.502137	0.35446	0.156592	0.248198	21.8918	13.2277	0.0128792	0.372949	0.972452	0.981943
FBgn0000352	cos	2R	7382176	7387115	-	4763	1114.38	233.966	969.446	203.537	-0.204577	0.0915733	0.0254816	0.0522275	901.517	189.275	-0.308183	0.0925748	0.000871538	0.00269724
FBgn0000355	Cp15	3L	8728481	8729066	+	515	0	0	0	0	NA	NA	NA	NA	0	0	NA	NA	NA	NA
FBgn0000356	Cp16	3L	8731944	8732599	+	522	0	0	0	0	NA	NA	NA	NA	0	0	NA	NA	NA	NA
FBgn0000357	Cp18	3L	8726791	8727613	+	649	0.491696	0.757621	0.951226	1.46568	1.23572	1.72609	0.474049	0.593101	3.36778	5.18919	2.96344	1.62211	0.0677143	0.130489
FBgn0000358	Cp19	3L	8729865	8730604	+	651	0.358524	0.550728	0	0	-1.52464	4.08046	0.708668	NA	0	0	-1.21951	4.08052	0.765046	NA
FBgn0000359	Cp36	X	8479319	8480523	+	1116	0	0	0	0	NA	NA	NA	NA	0	0	NA	NA	NA	NA
FBgn0000360	Cp38	X	8481837	8483311	+	1249	0	0	0	0	0	2.99219	1	NA	1.00942	0.80818	2.18803	2.87395	0.446458	NA
FBgn0000370	crc	2L	21310866	21319527	+	3423	4154.31	1213.65	2532.8	739.936	-0.713477	0.0616296	5.39907e-31	1.18002e-29	4238.03	1238.11	0.0294839	0.06113	0.629582	0.740675
FBgn0000376	crm	X	2734248	2738773	-	3886	225.893	58.1299	316.866	81.5403	0.486324	0.119699	4.84652e-05	0.000162773	281.999	72.5679	0.319709	0.122502	0.00905896	0.0224038
FBgn0000377	crn	X	2247594	2249983	-	2332	548.421	235.172	683.624	293.149	0.318732	0.0932316	0.00062918	0.00177769	596.362	255.73	0.117707	0.0950329	0.215498	0.333125
FBgn0000382	csw	X	2094234	2115701	+	8732	852.263	97.6023	636.335	72.8739	-0.425544	0.0868978	9.72818e-07	4.11434e-06	714.396	81.8135	-0.254653	0.0873535	0.00355464	0.00968844
FBgn0000384	cta	2L	22981816	22992951	+	2764	1538.53	556.632	1655.74	599.039	0.105989	0.0794797	0.182357	0.281399	1369.57	495.503	-0.167799	0.0805066	0.0371339	0.0774981
FBgn0000392	cup	2L	6663664	6674780	+	4306	0	0	0	0	NA	NA	NA	NA	0	0	NA	NA	NA	NA
FBgn0000394	cv	X	5690002	5693084	+	2053	1039.24	506.204	986.117	480.33	-0.0730876	0.0782332	0.350187	0.471695	940.575	458.146	-0.142343	0.0792742	0.0725611	0.138432
FBgn0000395	cv-2	2R	21355015	21379464	-	4329	295.862	68.3441	207.199	47.8631	-0.52727	0.137042	0.000119327	0.000377206	260.567	60.191	-0.185762	0.136728	0.174264	0.281795
FBgn0000404	CycA	3L	11826719	11833578	-	2919	3668.07	1256.62	5241.57	1795.67	0.514603	0.0799767	1.23948e-10	7.58386e-10	4141.33	1418.75	0.174372	0.0803464	0.0299881	0.0643983
FBgn0000405	CycB	2R	22803521	22806948	-	3047	772.413	253.499	1088.67	357.292	0.490565	0.0870824	1.76757e-08	9.0361e-08	914.629	300.174	0.242197	0.0884356	0.00616866	0.0158929
FBgn0000406	Cyt-b5-r	2L	16788774	16790721	-	1557	4.10506	2.63652	0.253458	0.162786	-3.85113	1.49789	0.0101393	0.0228129	3.27215	2.10157	-0.351229	1.03332	0.73393	0.818757
FBgn0000411	D	3L	14175610	14178620	-	2935	1.08963	0.371255	0	0	-2.88865	3.04243	0.342389	NA	0	0	-2.58351	3.04246	0.395797	NA
FBgn0000412	D1	3R	9238083	9240654	-	1877	8136.82	4335.01	14580.1	7767.74	0.840906	0.0668714	2.899e-36	7.7127e-35	12358	6583.9	0.602656	0.0669995	2.36383e-19	3.62307e-18
FBgn0000414	Dab	3L	16712126	16724575	+	9270	884.472	95.4123	753.126	81.2433	-0.235487	0.0783481	0.00265012	0.0067098	823.19	88.8015	-0.104355	0.0789233	0.186092	0.296672
FBgn0000416	Sap-r	3R	30883464	30889062	-	3527	16761.6	4752.37	9224.89	2615.5	-0.861186	0.0601269	1.57649e-46	6.04599e-45	9673.38	2742.66	-0.793092	0.0602101	1.27071e-39	5.43996e-38
FBgn0000422	Ddc	2L	19116483	19120306	-	2797	730.714	261.249	633.042	226.329	-0.206327	0.102107	0.043311	0.0828633	412.699	147.551	-0.821928	0.105891	8.35956e-15	9.12386e-14
FBgn0000426	SmF	2R	12183844	12184310	-	467	105.68	226.295	198.149	424.303	0.898818	0.169057	1.05685e-07	5.01201e-07	225.262	482.36	1.08991	0.169685	1.33472e-10	1.01582e-09
FBgn0000427	44531	X	7867161	7873222	-	5748	21.2591	3.69852	125.49	21.8319	2.57698	0.227927	1.22337e-29	2.52192e-28	894.135	155.556	5.40824	0.219642	7.16354e-134	3.0934e-131
FBgn0000439	Dfd	3R	6791836	6802428	+	2739	0	0	0	0	0	4.08046	1	NA	0.37527	0.13701	0.704067	4.08052	0.86301	NA
FBgn0000442	Pkg21D	2L	786153	790798	-	2583	2.64284	1.02317	0.253458	0.0981253	-3.19687	1.96361	0.103513	0.175071	0.37527	0.145285	-2.89171	1.96362	0.140848	0.238679
FBgn0000447	Dhod	3R	8651391	8652916	-	1472	160.158	108.803	198.17	134.626	0.320432	0.140682	0.0227445	0.0473285	203.874	138.501	0.355328	0.14269	0.0127667	0.0304
FBgn0000448	Hr3	2R	10203995	10237348	-	10465	0	0	0	0	NA	NA	NA	NA	0	0	NA	NA	NA	NA
FBgn0000449	dib	3L	4062292	4064551	+	1975	0	0	0	0	NA	NA	NA	NA	0	0	NA	NA	NA	NA
FBgn0000451	ect	3L	10190276	10201837	-	3741	0.365555	0.0977159	0	0	-1.52465	3.24988	0.638968	NA	0.64912	0.173515	0.601707	3.20059	0.850878	NA
FBgn0000454	Dip-B	3R	13782288	13785676	+	2102	495.412	235.686	249.067	118.49	-0.989327	0.103207	9.17382e-22	1.23325e-20	288.573	137.285	-0.78106	0.103935	5.69522e-14	5.85558e-13
FBgn0000455	Dip-C	3R	12411809	12413759	-	1951	247.798	127.011	203.641	104.378	-0.28174	0.130789	0.0312276	0.0623979	195.344	100.125	-0.337408	0.133716	0.0116252	0.02795
FBgn0000459	disco	X	16210598	16216750	-	3247	39.7395	12.2388	58.1296	17.9026	0.525765	0.271859	0.0531173	0.0991426	49.1253	15.1294	0.280884	0.279933	0.31567	0.448788
FBgn0000463	Dl	3R	19302731	19326217	-	5278	2.678	0.507389	0.355025	0.0672651	-3.22131	1.63391	0.0486623	0.091764	2.27771	0.431548	-0.240801	1.25916	0.848338	0.900951
FBgn0000464	Lar	2L	19586623	19732069	+	10337	71.5238	6.91921	88.617	8.5728	0.312522	0.196091	0.110991	0.185802	85.6666	8.28738	0.265552	0.200467	0.185282	0.295713
FBgn0000473	Cyp6a2	2R	6779749	6781491	-	1674	0	0	0	0	NA	NA	NA	NA	0	0	NA	NA	NA	NA
FBgn0000477	DNaseII	3R	18019375	18021161	+	1228	0.491696	0.400404	0	0	-1.52466	3.12313	0.625422	NA	0.64912	0.528599	0.6026	3.07167	0.84447	NA
FBgn0000479	dnc	X	3176440	3343767	+	16683	1949.39	116.849	426.872	25.5872	-2.2009	0.113037	1.95268e-84	1.78784e-82	652.635	39.1198	-1.57935	0.111811	2.65878e-45	1.4274e-43
FBgn0000482	dor	X	1665052	1668451	+	3161	198.296	62.732	207.851	65.7549	0.0649546	0.132888	0.62499	0.724674	192.408	60.8693	-0.0406499	0.136168	0.7653	0.842398
FBgn0000489	Pka-C3	3L	15925805	15954797	-	3091	2950.42	954.52	197.306	63.8323	-3.90861	0.0945682	0	0	163.742	52.9737	-4.17078	0.101622	0	0
FBgn0000490	dpp	2L	2428372	2459823	+	5214	9.47392	1.81702	3.51341	0.673841	-1.45705	0.540404	0.00701303	0.0163509	117.505	22.5365	3.62735	0.370626	1.27926e-22	2.42473e-21
FBgn0000492	Dr	3R	29556386	29565244	+	2552	0.358524	0.140488	0	0	-1.52465	3.17263	0.630826	NA	0.75054	0.294099	0.765977	3.10364	0.805063	NA
FBgn0000499	dsh	X	11355881	11358724	+	2844	323.506	113.75	317.217	111.539	-0.0389683	0.118523	0.74232	0.820954	338.54	119.037	0.0624252	0.119608	0.601729	0.716248
FBgn0000500	Dsk	3R	4189692	4190260	-	569	0	0	0.253458	0.445444	0.39891	3.98214	0.920206	NA	0.309586	0.544089	0.704067	3.9822	0.859663	NA
FBgn0000504	dsx	3R	7924323	7967408	-	9053	53.0126	5.85581	162.13	17.9089	1.60254	0.196253	3.19722e-16	2.95932e-15	157.271	17.3722	1.56835	0.19854	2.80139e-15	3.1871e-14
FBgn0000520	dwg	X	2727698	2730042	+	2002	142.778	71.3179	163.02	81.4284	0.193171	0.162307	0.233984	0.342945	153.816	76.8313	0.109161	0.165512	0.50955	0.638046
FBgn0000524	dx	X	6533999	6538575	+	3828	648.969	169.532	968.881	253.104	0.573039	0.0862893	3.1176e-11	2.00406e-10	977.598	255.381	0.588283	0.0870047	1.36563e-11	1.14266e-10
FBgn0000527	e	3R	21229839	21237177	-	3142	0.717048	0.228214	0	0	-2.31057	2.70329	0.392704	NA	0.684856	0.217968	-0.128851	2.63607	0.961015	NA
FBgn0000529	bsh	2L	19765776	19769067	-	2012	0	0	0	0	NA	NA	NA	NA	0	0	NA	NA	NA	NA
FBgn0000533	ea	3R	15328729	15330408	+	1527	15.8051	10.3504	1.20468	0.788922	-3.59287	0.895999	6.0743e-05	0.000200066	1.12581	0.737269	-3.93855	1.02593	0.000123533	0.000448277
FBgn0000535	eag	X	14955477	15009989	+	10636	2409.28	226.521	3936.87	370.146	0.707451	0.0649424	1.23772e-27	2.28708e-26	2113.07	198.672	-0.19082	0.0663537	0.00403008	0.010865
FBgn0000536	eas	X	16278328	16285618	+	4627	146.709	31.7071	75.9175	16.4075	-0.942755	0.186817	4.50196e-07	1.98583e-06	87.9274	19.0031	-0.744037	0.188262	7.7459e-05	0.00029064
FBgn0000541	E(bx)	3L	233926	246912	-	10072	3309.35	328.569	5103.87	506.739	0.623503	0.0725691	8.55781e-18	8.91117e-17	4503.4	447.121	0.443062	0.0728629	1.19619e-09	8.26188e-09
FBgn0000542	ec	X	3811698	3857621	+	8400	125.74	14.9691	205.391	24.4513	0.69536	0.151593	4.49614e-06	1.74539e-05	233.445	27.791	0.887883	0.152271	5.51219e-09	3.55962e-08
FBgn0000543	ecd	3L	2263581	2265857	-	2204	371.542	168.576	397.706	180.447	0.0983026	0.108442	0.36467	0.486753	345.97	156.974	-0.107379	0.111134	0.333935	0.46832
FBgn0000546	EcR	2R	6087873	6169087	-	9934	913.837	91.9909	1192.16	120.008	0.379011	0.0785468	1.39796e-06	5.79188e-06	1089.1	109.633	0.250141	0.079568	0.00166806	0.00488563
FBgn0000547	ed	2L	4031377	4115749	+	6425	663.934	103.336	1450.29	225.727	1.12587	0.0902861	1.08817e-35	2.84295e-34	1202.51	187.161	0.858841	0.0913055	5.14237e-21	8.92903e-20
FBgn0000551	Edg78E	3L	21296763	21297803	-	967	0	0	0.253458	0.262107	0.398909	3.82006	0.916832	NA	0.37527	0.388076	0.704068	3.82012	0.853774	NA
FBgn0000552	Edg84A	3R	6684445	6685157	+	652	0	0	0	0	NA	NA	NA	NA	0	0	NA	NA	NA	NA
FBgn0000557	eEF1alpha2	3R	31738468	31743306	+	2656	19.9907	7.5266	2.47289	0.931059	-3.18211	0.738765	1.65226e-05	5.921e-05	5.16347	1.94408	-1.99556	0.657114	0.00239056	0.00679149
FBgn0000559	eEF2	2L	21677913	21682164	-	3056	39540.6	12938.7	34959.5	11439.6	-0.17761	0.063904	0.00544722	0.0129831	46030.2	15062.2	0.219195	0.0638941	0.000602252	0.00192767
FBgn0000560	eg	3L	21808703	21817600	+	2033	70.9598	34.904	127.738	62.8324	0.859842	0.188825	5.27234e-06	2.02275e-05	59.8912	29.4595	-0.237203	0.207047	0.251941	0.375605
FBgn0000562	egl	2R	23734904	23746829	-	4515	2122.86	470.18	2092.68	463.495	-0.0220135	0.0872713	0.800854	0.864025	2118.8	469.281	-0.00320954	0.0875892	0.97077	0.980942
FBgn0000564	Eh	3R	17446642	17448858	-	704	0	0	0	0	NA	NA	NA	NA	0	0	NA	NA	NA	NA
FBgn0000565	MsrA	3L	15511052	15513202	+	1354	271.445	200.477	200.963	148.422	-0.421403	0.135014	0.00180133	0.00470858	195.195	144.161	-0.470848	0.137805	0.000633701	0.00201922
FBgn0000566	Eip55E	2R	18627918	18629395	+	1478	250.302	169.352	310.216	209.889	0.309149	0.121798	0.0111421	0.0248436	351.072	237.532	0.486081	0.122438	7.18701e-05	0.000271412
FBgn0000567	Eip74EF	3L	17558672	17619325	-	9332	257.783	27.6236	315.807	33.8413	0.277549	0.134216	0.0386464	0.0751125	287.237	30.7798	0.148839	0.136487	0.275495	0.403461
FBgn0000568	Eip75B	3L	17950953	18064696	-	13451	2333.75	173.5	3232.8	240.339	0.467879	0.089566	1.75248e-07	8.1289e-07	4351.07	323.476	0.897672	0.0894701	1.08929e-23	2.19895e-22
FBgn0000575	emc	3L	749400	753492	+	2049	2431.48	1186.67	4208.25	2053.81	0.789652	0.0726362	1.57902e-27	2.90191e-26	3083.16	1504.72	0.341384	0.0732553	3.15902e-06	1.45796e-05
FBgn0000576	ems	3R	13901853	13904620	+	2478	1.09667	0.442561	0	0	-2.89195	3.35743	0.389041	NA	0	0	-2.58682	3.35747	0.441024	NA
FBgn0000577	en	2R	11524006	11528210	-	2792	42.5276	15.2319	33.0359	11.8323	-0.369431	0.2956	0.211385	0.3163	30.3178	10.8588	-0.491278	0.305305	0.107587	0.191978
FBgn0000578	ena	2R	19141632	19163705	+	6075	4697.68	773.281	3728.16	613.689	-0.334986	0.0676512	7.35805e-07	3.15793e-06	2651.75	436.501	-0.825985	0.0684572	1.60256e-33	5.37724e-32
FBgn0000579	Eno	2L	1724768	1729636	-	3718	3157.01	849.115	1730.6	465.465	-0.869045	0.0750811	5.53313e-31	1.20672e-29	3852.45	1036.16	0.287434	0.0740746	0.000104316	0.000382313
FBgn0000581	E(Pc)	2R	11452043	11465270	+	10946	1595.68	145.778	3592.74	328.224	1.1677	0.0851834	9.08327e-43	3.10819e-41	3264.74	298.259	1.03085	0.0855009	1.78983e-33	5.98539e-32
FBgn0000588	esc	2L	11827204	11829405	-	1704	96.3146	56.5226	146.892	86.2041	0.619952	0.171186	0.000292887	0.000869083	135.132	79.3027	0.499993	0.17493	0.00425983	0.0114317
FBgn0000591	E(spl)m8-HLH	3R	26040240	26041008	+	769	0	0	0	0	NA	NA	NA	NA	0	0	NA	NA	NA	NA
FBgn0000592	Est-6	3L	12188818	12190705	+	1837	0	0	0	0	NA	NA	NA	NA	0	0	NA	NA	NA	NA
FBgn0000594	Est-P	3L	12190733	12192528	+	1740	0	0	0	0	NA	NA	NA	NA	0	0	NA	NA	NA	NA
FBgn0000606	eve	2R	9979319	9980795	+	1406	9.59303	6.82292	1.68796	1.20054	-2.42827	0.98095	0.0133077	0.0292236	0	0	-5.6934	1.42576	6.518e-05	0.000247942
FBgn0000611	exd	X	15992468	15996509	+	3302	2830.42	857.184	3188.78	965.712	0.170485	0.0696958	0.0144397	0.0314443	2803.92	849.157	-0.0139255	0.0701909	0.842736	0.897039
FBgn0000615	exu	2R	20667427	20671083	-	3290	54.6056	16.5975	71.313	21.6757	0.390565	0.227426	0.0859194	0.149751	108.155	32.8738	1.00014	0.224006	8.01444e-06	3.4958e-05
FBgn0000617	e(y)1	X	17842161	17843348	+	1124	365.668	325.327	540.349	480.737	0.563088	0.115088	9.94676e-07	4.19805e-06	504.607	448.938	0.458909	0.116519	8.19943e-05	0.000306614
FBgn0000618	e(y)2	X	11576118	11576620	-	503	34.9502	69.4834	53.9969	107.35	0.636716	0.271274	0.0189184	0.0401311	47.7502	94.9308	0.442569	0.278994	0.11267	0.199437
FBgn0000625	eyg	3L	12462537	12468021	-	3148	0	0	0	0	NA	NA	NA	NA	0	0	NA	NA	NA	NA
FBgn0000629	E(z)	3L	10634575	10638130	-	2665	490.157	183.924	631.468	236.948	0.367781	0.100049	0.000236897	0.000713569	552.057	207.151	0.170357	0.101849	0.094396	0.172106
FBgn0000633	CG17716	2R	13623044	13749367	+	5978	26.2636	4.39337	21.9212	3.66698	-0.293984	0.40717	0.470283	0.589988	11.8652	1.98482	-1.13422	0.444523	0.0107247	0.0260562
FBgn0000635	Fas2	X	4132887	4206093	-	7306	40.8912	5.59694	58.4487	8.0001	0.499127	0.251665	0.0473337	0.0895815	60.8292	8.32592	0.557167	0.255148	0.028984	0.0625667
FBgn0000636	Fas3	2L	18320102	18393441	+	6612	2120.64	320.726	956.512	144.663	-1.1494	0.0850251	1.21844e-41	3.94363e-40	669.764	101.295	-1.66344	0.0876046	2.14237e-80	3.37746e-78
FBgn0000639	Fbp1	3L	14094589	14098053	-	3465	0	0	0	0	NA	NA	NA	NA	0	0	NA	NA	NA	NA
FBgn0000640	Fbp2	2L	9426784	9427917	+	1074	0	0	0	0	NA	NA	NA	NA	0	0	NA	NA	NA	NA
FBgn0000644	Fcp3C	X	3173376	3174474	-	963	3.54108	3.67714	1.31853	1.36919	-1.53212	1.231	0.213273	0.318422	2.63801	2.73936	-0.354207	1.13925	0.755868	0.836093
FBgn0000658	fj	2R	18232761	18236311	+	3551	1.5743	0.44334	1.69258	0.476648	0.060687	1.29898	0.962737	0.976379	1.95315	0.550028	0.322236	1.30286	0.804654	0.870912
FBgn0000659	fkh	3R	28580976	28585264	-	4289	0.358524	0.0835915	0	0	-1.52464	3.73461	0.683092	NA	0.309586	0.0721815	-0.257722	3.73466	0.944983	NA
FBgn0000662	fl(2)d	2R	13819624	13824553	-	2977	1516.45	509.388	2874.34	965.517	0.92246	0.0697713	6.62056e-40	1.97896e-38	2720.71	913.909	0.844602	0.0701804	2.33407e-33	7.72732e-32
FBgn0000667	Actn	X	2023822	2042311	-	5272	2532.05	480.282	2704.02	512.902	0.0933046	0.0658904	0.156759	0.248357	2538.92	481.585	0.00405147	0.0663676	0.951323	0.968286
FBgn0000709	fliI	X	21339741	21345088	+	4827	1067.42	221.134	928.391	192.333	-0.20016	0.107631	0.0629294	0.114636	861.075	178.387	-0.311997	0.108538	0.00404598	0.0109041
FBgn0000711	flw	X	10385960	10409817	+	4276	1497.44	350.196	904.438	211.515	-0.729515	0.0790173	2.64762e-20	3.26154e-19	821.546	192.13	-0.865957	0.0803851	4.63716e-27	1.10712e-25
FBgn0000715	FMRFa	2R	9906294	9910457	+	1427	0.358524	0.251243	0	0	-1.52464	4.08046	0.708668	NA	0	0	-1.21951	4.08052	0.765046	NA
FBgn0000719	fog	X	22824317	22855194	-	6564	801.694	122.135	586.219	89.3082	-0.45605	0.08868	2.70898e-07	1.22963e-06	533.247	81.2381	-0.591249	0.0905581	6.62347e-11	5.20857e-10
FBgn0000721	for	2L	3622074	3656953	-	6929	896.25	129.348	797.096	115.038	-0.173798	0.0872915	0.0464797	0.0881787	891.855	128.713	-0.00946963	0.0876678	0.913982	0.943331
FBgn0000723	FER	3R	9367603	9394546	-	5128	1014.66	197.867	744.079	145.101	-0.449512	0.0807021	2.5471e-08	1.28086e-07	667.699	130.207	-0.604507	0.0824121	2.21428e-13	2.16034e-12
FBgn0000808	gd	X	11985154	11987764	-	2261	59.3379	26.2441	81.4316	36.0157	0.452626	0.208351	0.0298239	0.0599368	93.4087	41.313	0.646553	0.209623	0.00203988	0.00588101
FBgn0000810	fs(1)K10	X	2242138	2246041	+	3052	537.268	176.038	680.864	223.088	0.344012	0.0919469	0.000182979	0.000560631	675.952	221.478	0.33388	0.0930027	0.000330682	0.0011092
FBgn0000826	png	X	1356488	1357601	-	1114	21.6969	19.4766	12.5298	11.2476	-0.843447	0.418261	0.0437419	0.0836236	23.4513	21.0514	0.0936718	0.398256	0.81405	0.877961
FBgn0000927	fs(1)Ya	X	2724286	2726577	+	2235	3.54812	1.58752	2.57354	1.15147	-0.377195	1.12841	0.738175	0.817576	1.77493	0.794152	-0.980294	1.20889	0.417419	0.55254
FBgn0000928	fs(1)Yb	X	2720468	2724158	+	3502	372.758	106.442	335.055	95.6754	-0.159644	0.108279	0.140381	0.226387	327.841	93.6154	-0.183472	0.110215	0.0959784	0.174493
FBgn0000964	tj	2L	19464267	19467758	+	3492	2989.4	856.072	5063.9	1450.14	0.759874	0.0745885	2.25375e-24	3.51841e-23	3423.63	980.42	0.195431	0.0751947	0.00934974	0.0230884
FBgn0000996	dup	2R	15376619	15380988	-	3138	692.16	220.574	954.512	304.178	0.462835	0.0841498	3.79504e-08	1.87046e-07	793.309	252.807	0.193971	0.0858156	0.0238015	0.0526379
FBgn0001075	ft	2L	4198404	4221796	-	16852	52.9299	3.14087	158.215	9.3885	1.57167	0.194318	6.05843e-16	5.5024e-15	126.149	7.4857	1.24353	0.19924	4.33785e-10	3.14478e-09
FBgn0001077	ftz	3R	6864324	6866244	+	1774	0	0	0	0	NA	NA	NA	NA	0	0	NA	NA	NA	NA
FBgn0001078	ftz-f1	3L	18750607	18801309	-	8581	2206.49	257.137	2817.49	328.34	0.350641	0.0754193	3.33195e-06	1.31607e-05	2430.02	283.186	0.13796	0.075974	0.0693887	0.133198
FBgn0001079	fu	X	18657755	18661204	+	3251	125.165	38.5005	136.342	41.9386	0.122205	0.164364	0.457179	0.576752	116.572	35.8573	-0.0948129	0.169739	0.576448	0.694985
FBgn0001083	fw	X	11992915	12003914	-	4698	0.857251	0.182472	0	0	-2.47663	2.46813	0.315646	0.434912	0.684856	0.145776	-0.297	2.39454	0.90129	NA
FBgn0001084	fy	2L	8401476	8403280	-	1688	36.9322	21.8793	36.5388	21.6462	-0.0293851	0.301609	0.922386	0.949095	43.8444	25.9742	0.246814	0.302033	0.413827	0.549189
FBgn0001085	fz	3L	14274343	14368639	+	3817	96.2678	25.2208	338.334	88.6387	1.8142	0.151473	4.68974e-33	1.10074e-31	426.075	111.626	2.15191	0.151298	6.59977e-46	3.64161e-44
FBgn0001086	fzy	2L	16310956	16313097	+	1996	1588.04	795.613	2365.62	1185.18	0.573197	0.0665088	6.79215e-18	7.11635e-17	2103.18	1053.7	0.404104	0.0671825	1.79867e-09	1.22108e-08
FBgn0001087	g	X	13727204	13736278	-	4404	1956.12	444.169	1716.07	389.662	-0.191972	0.0855921	0.0249049	0.0511744	1807.38	410.394	-0.114767	0.085896	0.18151	0.290861
FBgn0001089	Gal	2L	6003574	6006827	-	2345	0.85022	0.362567	0	0	-2.48573	3.37559	0.461496	NA	0	0	-2.1806	3.37563	0.518291	NA
FBgn0001090	bnb	X	18794246	18797687	-	2726	172.144	63.1488	4.71347	1.72908	-5.11452	0.412075	2.25986e-35	5.81441e-34	10.6211	3.89622	-4.01791	0.351118	2.54356e-30	7.19734e-29
FBgn0001091	Gapdh1	2R	7791901	7793380	-	1480	1935.95	1308.08	1393.38	941.472	-0.473423	0.0689869	6.76579e-12	4.55973e-11	1847.35	1248.21	-0.0664776	0.0687549	0.333605	0.467951
FBgn0001092	Gapdh2	X	15868145	15869661	+	1443	7966.96	5521.11	4434.68	3073.24	-0.845482	0.0647186	5.28905e-39	1.54019e-37	6492.2	4499.1	-0.295076	0.0645497	4.84706e-06	2.18922e-05
FBgn0001098	Gdh	3R	23935958	23943101	-	2343	7973.53	3403.13	6405.26	2733.79	-0.316221	0.0703016	6.85754e-06	2.58314e-05	7413.88	3164.27	-0.104862	0.0703342	0.135985	0.232062
FBgn0001099	gdl	3L	15509445	15511047	+	1175	0	0	0.608483	0.517858	1.41648	2.97859	0.634392	NA	0.37527	0.319379	0.70407	3.04845	0.817346	NA
FBgn0001104	Galphai	3L	6972750	6980044	-	2067	1270.62	614.718	1624.82	786.077	0.355501	0.0711229	5.78084e-07	2.52474e-06	1565.04	757.157	0.29959	0.0717868	3.00189e-05	0.000119834
FBgn0001105	Gbeta13F	X	15860115	15866175	+	5605	23142.1	4128.84	17442.8	3112.02	-0.408199	0.0781052	1.72959e-07	8.02642e-07	18311.7	3267.03	-0.33791	0.0781386	1.52881e-05	6.36117e-05
FBgn0001108	DCTN1-p150	3L	13929387	13934656	+	4550	538.925	118.445	471.882	103.71	-0.196201	0.100072	0.0499257	0.0938578	503.938	110.756	-0.0973087	0.100942	0.335043	0.469278
FBgn0001112	Gld	3R	7252063	7265703	-	2899	0.85022	0.293281	0.697769	0.240693	-0.121913	1.82032	0.946603	0.965218	1.319	0.454985	0.700273	1.75703	0.690221	0.784985
FBgn0001114	Glt	2L	8672698	8676804	+	3373	2871.02	851.177	424.936	125.982	-2.76135	0.119176	9.05962e-119	1.46147e-116	346.122	102.615	-3.05089	0.121942	3.77932e-138	1.78744e-135
FBgn0001120	gnu	3L	14802380	14803360	-	923	6.43037	6.96682	1.42684	1.54587	-2.07032	1.06979	0.0529597	0.0989115	2.80125	3.03494	-1.14778	1.00808	0.254881	0.379247
FBgn0001122	Galphao	2R	10437985	10465701	+	6415	760.62	118.569	629.302	98.0985	-0.271882	0.0868228	0.00173937	0.00455716	624.35	97.3266	-0.284994	0.0880473	0.00120865	0.00364541
FBgn0001123	Galphas	2R	23942538	23946936	+	2112	2659.38	1259.18	2800.85	1326.16	0.0755441	0.0718406	0.293005	0.410347	2506.46	1186.77	-0.0849143	0.0723547	0.240562	0.362887
FBgn0001124	Got1	2R	16138352	16141928	+	1770	738.988	417.507	456.81	258.085	-0.68874	0.104081	3.65738e-11	2.33765e-10	511.038	288.722	-0.533833	0.104677	3.39991e-07	1.76888e-06
FBgn0001125	Got2	2L	1984512	1987758	-	1734	1835.73	1058.67	1780.63	1026.89	-0.0428418	0.0789381	0.587318	0.692851	2651.02	1528.85	0.529009	0.0785716	1.66407e-11	1.37729e-10
FBgn0001128	Gpdh1	2L	5943643	5948968	+	3152	926.408	293.911	1177.73	373.645	0.342665	0.0809995	2.33213e-05	8.16729e-05	1116.47	354.209	0.26711	0.0818575	0.00110197	0.00335009
FBgn0001133	grau	2R	21009764	21011921	-	1894	197.594	104.326	241.025	127.257	0.297451	0.128222	0.0203512	0.0428041	240.738	127.106	0.290865	0.130352	0.0256556	0.0562125
FBgn0001134	Grd	3L	17823333	17839767	+	4071	0	0	0	0	NA	NA	NA	NA	0	0	NA	NA	NA	NA
FBgn0001137	grk	2L	8431086	8433598	-	1718	165.685	96.4403	27.252	15.8627	-2.59412	0.247358	9.88134e-26	1.65443e-24	31.8773	18.5549	-2.36647	0.249712	2.62242e-21	4.6345e-20
FBgn0001138	grn	3R	8147368	8181444	-	4090	1.21578	0.297256	0	0	-3.01429	2.70046	0.264331	NA	0	0	-2.70914	2.70048	0.315761	NA
FBgn0001139	gro	3R	26041736	26049911	+	4455	3541.88	795.034	5371.69	1205.77	0.599723	0.0707726	2.37203e-17	2.39632e-16	4965.81	1114.66	0.486957	0.0710113	7.00942e-12	6.0275e-11
FBgn0001142	Gs1	2L	132077	134472	+	2396	2935.09	1224.99	2756.97	1150.65	-0.0900619	0.0658056	0.171123	0.267023	1962.24	818.965	-0.579648	0.0669217	4.6527e-18	6.5921e-17
FBgn0001145	Gs2	X	11422832	11430197	+	2231	296.939	133.097	39.078	17.5159	-2.94951	0.183666	4.93378e-58	2.61156e-56	69.4565	31.1325	-2.09084	0.170673	1.6693e-34	5.87925e-33
FBgn0001147	gsb-n	2R	25040383	25052331	-	2237	0	0	0	0	NA	NA	NA	NA	0	0	NA	NA	NA	NA
FBgn0001148	gsb	2R	25061964	25064643	+	1649	0	0	0	0	NA	NA	NA	NA	0	0	NA	NA	NA	NA
FBgn0001149	GstD1	3R	12367817	12369268	-	843	864.818	1025.88	883.514	1048.06	0.0348612	0.102418	0.733568	0.814248	1084.4	1286.36	0.32975	0.102402	0.00128119	0.00384898
FBgn0001150	gt	X	2427113	2428967	-	1780	26.4339	14.8505	20.1016	11.293	-0.413727	0.369466	0.2628	0.37729	20.297	11.4028	-0.381108	0.377222	0.31235	0.445279
FBgn0001168	h	3L	8675759	8679253	+	2335	4786.93	2050.08	3906.76	1673.13	-0.294573	0.0799305	0.000228376	0.000689743	4426.32	1895.64	-0.113592	0.0799984	0.155628	0.25796
FBgn0001169	H	3R	20621938	20628915	+	6004	1203.75	200.491	1723.48	287.055	0.514609	0.0844344	1.09588e-09	6.19435e-09	1737.66	289.417	0.529102	0.0848425	4.48107e-10	3.24151e-09
FBgn0001170	H2.0	2L	6013059	6019402	-	1662	0	0	0	0	NA	NA	NA	NA	0	0	NA	NA	NA	NA
FBgn0001174	halo	2L	1517533	1518148	-	616	0.983392	1.59642	0.355025	0.576339	-1.68413	2.9145	0.563368	NA	0	0	-2.34076	2.91452	0.421895	NA
FBgn0001179	hay	3L	10631079	10633969	+	2628	500.648	190.505	536.673	204.213	0.100897	0.0957075	0.291782	0.409526	519.069	197.515	0.0527705	0.09718	0.587117	0.704441
FBgn0001180	hb	3R	8690980	8697822	-	3835	0.358524	0.0934874	3.82485	0.997353	3.17406	1.40869	0.0242469	0.0500063	6.89881	1.79891	4.00899	1.3926	0.00399217	0.0107775
FBgn0001185	her	2L	16677185	16679691	+	2378	956.067	402.047	1064.63	447.701	0.152263	0.0930689	0.101834	0.172874	853.514	358.921	-0.164478	0.0945614	0.0819682	0.153028
FBgn0001186	Hex-A	X	9585675	9589813	+	4139	6441.05	1556.18	5133.33	1240.24	-0.328258	0.0741635	9.59377e-06	3.54809e-05	6978.23	1685.97	0.115058	0.0740842	0.120406	0.210023
FBgn0001187	Hex-C	2R	15218837	15220329	-	1493	0	0	0	0	NA	NA	NA	NA	0	0	NA	NA	NA	NA
FBgn0001189	hfw	X	1669570	1673608	+	3038	474.924	156.328	197.855	65.1266	-1.2676	0.119901	4.01762e-26	6.83937e-25	194.027	63.8668	-1.2972	0.122932	4.96485e-26	1.13098e-24
FBgn0001197	His2Av	3R	26866929	26869220	+	1224	2863.94	2339.82	6899.56	5636.9	1.26692	0.0628652	2.53869e-90	2.52948e-88	5670.21	4632.53	0.984469	0.0631829	9.76304e-55	7.45897e-53
FBgn0001202	hook	2L	19030844	19033498	-	2317	645.251	278.486	292.266	126.14	-1.14183	0.0982542	3.21666e-31	7.07596e-30	286.962	123.851	-1.17028	0.10074	3.38043e-31	1.01128e-29
FBgn0001206	Hmr	X	10590920	10595855	-	4696	301.453	64.1935	454.364	96.7555	0.586754	0.104239	1.81313e-08	9.25041e-08	407.996	86.8817	0.43509	0.106401	4.32927e-05	0.000169151
FBgn0001208	Hn	3L	7760453	7763166	+	2115	0	0	0.355025	0.167861	0.398908	3.61685	0.912178	NA	0.37527	0.177433	0.704068	3.61689	0.845658	NA
FBgn0001215	Hrb98DE	3R	28599834	28605777	+	2743	14482	5279.62	19661.4	7167.84	0.440748	0.0556848	2.47153e-15	2.17661e-14	17820.6	6496.77	0.299099	0.0557745	8.20085e-08	4.61345e-07
FBgn0001216	Hsc70-1	3L	13974061	13977761	+	2718	0	0	0.799336	0.29409	1.84823	2.25543	0.412526	0.534937	1.28327	0.472136	2.55327	2.21618	0.249277	0.372696
FBgn0001217	Hsc70-2	3R	13044759	13047388	+	2174	0.724079	0.333063	0	0	-2.32658	2.52857	0.357512	NA	0.69983	0.321909	-0.124824	2.45362	0.959427	NA
FBgn0001218	Hsc70-3	X	11801696	11807117	-	3589	12232.5	3408.33	9304.18	2592.41	-0.394975	0.0856523	4.0002e-06	1.56422e-05	9301.11	2591.56	-0.395645	0.0857305	3.9311e-06	1.80008e-05
FBgn0001220	Hsc70-5	2R	14252598	14256192	-	2922	3167.89	1084.15	2906.52	994.703	-0.122754	0.0746064	0.0998959	0.170314	3239.38	1108.62	0.0319125	0.0747312	0.669357	0.769202
FBgn0001222	Hsf	2R	18130303	18134634	-	2910	992.901	341.203	717.068	246.415	-0.471153	0.0769883	9.36931e-10	5.3285e-09	656.505	225.603	-0.597174	0.0787145	3.2847e-14	3.45224e-13
FBgn0001223	Hsp22	3L	9372931	9374964	+	1900	0	0	0	0	NA	NA	NA	NA	0	0	NA	NA	NA	NA
FBgn0001224	Hsp23	3L	9381882	9382765	+	884	1271.13	1437.93	189.55	214.423	-2.74851	0.0978762	1.64951e-173	6.4477e-171	166.868	188.765	-2.92752	0.103771	4.23705e-175	3.00589e-172
FBgn0001225	Hsp26	3L	9376418	9377427	-	1010	18.9806	18.7927	33.4719	33.1405	0.850479	0.370599	0.0217403	0.0454436	24.6443	24.4003	0.419234	0.385322	0.276591	0.404567
FBgn0001226	Hsp27	3L	9384063	9385694	+	1632	14403.4	8825.59	17164.6	10517.5	0.252842	0.0823769	0.00214541	0.00552836	12632.2	7740.33	-0.189452	0.0825096	0.021669	0.0485925
FBgn0001227	Hsp67Ba	3L	9377802	9379534	-	1733	332.343	191.773	254.393	146.793	-0.3912	0.131558	0.00294336	0.00737327	297.559	171.702	-0.155088	0.13191	0.23971	0.361878
FBgn0001228	CG4456	3L	9372722	9374964	+	2109	0.857251	0.406473	0.666467	0.316011	-0.255404	2.53404	0.919718	0.947021	0	0	-2.17701	2.64495	0.410461	NA
FBgn0001229	Hsp67Bc	3L	9371511	9372497	-	987	11.5739	11.7263	3.24093	3.28361	-1.89282	0.844895	0.0250713	0.0514955	0.32456	0.328835	-4.98999	1.38489	0.00031438	0.00105773
FBgn0001230	Hsp68	3R	24055080	24057310	-	2231	305.224	136.81	77.0292	34.5268	-1.9778	0.164069	1.83219e-33	4.40201e-32	74.0211	33.1785	-2.04398	0.170412	3.80507e-33	1.24316e-31
FBgn0001233	Hsp83	3L	3192969	3197059	+	2960	17280.7	5838.09	15626.5	5279.22	-0.145569	0.0665559	0.0287298	0.0580159	12852.7	4342.13	-0.427285	0.0666882	1.48216e-10	1.11861e-09
FBgn0001234	lncRNA:Hsromega	3R	21296127	21317836	+	21710	2390.19	110.096	1605.66	73.9593	-0.573843	0.100054	9.73018e-09	5.07377e-08	1366.56	62.9463	-0.805174	0.100819	1.39028e-15	1.62642e-14
FBgn0001235	hth	3R	10507561	10639568	-	11839	6.18512	0.522436	0.830638	0.0701612	-2.95191	1.16608	0.0113584	0.0252873	1.319	0.111412	-2.23033	1.09079	0.0408856	0.0843005
FBgn0001247	Ide	3L	20371672	20375896	-	3439	2060.48	599.152	1517.28	441.197	-0.441008	0.0729053	1.45705e-09	8.12287e-09	1816.06	528.078	-0.183057	0.0729604	0.0121076	0.0289835
FBgn0001248	Idh	3L	8356404	8360906	-	2434	531.204	218.243	456.193	187.425	-0.215411	0.101137	0.0331805	0.0656823	637.517	261.921	0.266936	0.100378	0.00783016	0.0197284
FBgn0001250	if	X	16752189	16783434	-	6011	4.13319	0.687604	0.577181	0.0960207	-2.94399	1.53995	0.055909	0.10363	0.64912	0.107989	-2.6643	1.54752	0.0851318	0.157885
FBgn0001253	ImpE1	3L	8372405	8391171	+	6264	11.3357	1.80965	1.64899	0.263249	-2.65108	0.858122	0.00200563	0.00519186	3.09393	0.493923	-1.88781	0.807711	0.019427	0.0441734
FBgn0001254	ImpE2	3L	3510974	3512681	-	1708	1.58133	0.925838	0	0	-3.40223	2.18889	0.120109	0.198547	0.37527	0.219713	-2.13529	2.1889	0.32931	0.463601
FBgn0001255	ImpE3	3R	8028453	8029546	-	1094	9.71917	8.88407	10.0713	9.20598	0.086863	0.540291	0.872274	0.914565	13.6498	12.477	0.493723	0.536688	0.357602	0.492131
FBgn0001256	ImpL1	3L	13382765	13383999	+	1235	0.358524	0.290303	0	0	-1.52464	4.08046	0.708668	NA	0	0	-1.21951	4.08052	0.765046	NA
FBgn0001257	ImpL2	3L	4224006	4236147	-	2667	1886.27	707.262	1140.19	427.517	-0.728069	0.0694438	1.02011e-25	1.69679e-24	2493.28	934.863	0.402173	0.0678335	3.05093e-09	2.02012e-08
FBgn0001258	Ldh	3L	6259105	6262694	-	1942	2718.61	1399.9	401.054	206.516	-2.7645	0.208803	5.17134e-40	1.55033e-38	816.651	420.52	-1.735	0.207411	6.01128e-17	7.79426e-16
FBgn0001259	in	3L	20367198	20370259	+	3062	0	0	0	0	NA	NA	NA	NA	0	0	NA	NA	NA	NA
FBgn0001263	inaD	2R	22855688	22858794	-	2331	0	0	0.253458	0.108733	0.398909	2.49938	0.873193	0.915061	1.33398	0.572276	2.59311	2.32017	0.263722	NA
FBgn0001269	inv	2R	11474465	11509695	+	5919	0	0	1.27495	0.215399	2.54804	1.86502	0.171867	0.267979	1.62859	0.275146	2.89271	1.86131	0.120154	0.209621
FBgn0001276	ix	2R	11359437	11360163	-	727	145.236	199.775	127.934	175.976	-0.194448	0.161591	0.228847	0.337117	126.584	174.119	-0.204827	0.164854	0.214061	0.331315
FBgn0001280	janA	3R	30038622	30039533	-	740	732.033	989.234	1132.14	1529.92	0.635811	0.0907764	2.48497e-12	1.75624e-11	1167.44	1577.62	0.680289	0.0912868	9.17856e-14	9.2927e-13
FBgn0001281	janB	3R	30037984	30038728	-	569	0	0	0.253458	0.445444	0.398909	3.94276	0.919411	NA	0.32456	0.570404	0.704068	3.94282	0.858276	NA
FBgn0001285	Jon44E	2R	8691448	8692844	+	1397	0	0	0	0	NA	NA	NA	NA	0	0	NA	NA	NA	NA
FBgn0001291	Jra	2R	10096480	10098556	+	1642	436.907	266.082	233.267	142.063	-0.908247	0.122858	1.43899e-13	1.12323e-12	313.706	191.051	-0.480902	0.121994	8.08014e-05	0.000302495
FBgn0001296	kar	3R	12682186	12689367	-	2678	29.4263	10.9881	48.8502	18.2413	0.719267	0.285468	0.0117487	0.0260475	54.2477	20.2568	0.886273	0.287428	0.00204606	0.00589712
FBgn0001297	kay	3R	29765995	29794113	+	7789	3544.01	455.002	2574.06	330.474	-0.463555	0.0932165	6.59644e-07	2.85518e-06	2356.59	302.553	-0.588733	0.0936088	3.18914e-10	2.34453e-09
FBgn0001301	kel	2L	18129884	18138083	-	5476	1234.15	225.374	1546.54	282.422	0.322486	0.0855955	0.000164851	0.00050846	1449.47	264.695	0.229142	0.0862453	0.00788718	0.0198519
FBgn0001308	Khc	2R	16266960	16271971	-	3718	3657.83	983.817	3184.35	856.469	-0.200325	0.0732307	0.00622794	0.0146685	2922.28	785.982	-0.3242	0.0736326	1.06796e-05	4.57542e-05
FBgn0001311	kkv	3R	5378093	5392866	-	5701	1.0826	0.189897	0.253458	0.0444584	-1.95565	2.02613	0.334438	0.455494	1.00942	0.17706	-0.168774	1.84701	0.927193	0.951626
FBgn0001313	kl-2	Y	573088	664173	+	13386	0.365555	0.0273088	0	0	-1.52465	3.72015	0.681928	NA	0.309586	0.0231276	-0.257722	3.7202	0.94477	NA
FBgn0001316	klar	3L	434083	540614	-	11717	5528.52	471.837	5591.29	477.195	0.0150862	0.0751596	0.840916	0.892091	4638.69	395.894	-0.253882	0.0754781	0.000769176	0.00241373
FBgn0001319	kn	2R	14772650	14807061	-	4391	5.81956	1.32534	1.36424	0.310689	-1.97586	1.09301	0.0706503	0.126501	0.994443	0.226473	-2.55218	1.2303	0.0380388	0.0792036
FBgn0001320	kni	3L	20692330	20695378	-	2215	0.85022	0.383847	0	0	-2.48573	3.37559	0.461496	NA	0	0	-2.1806	3.37563	0.518291	NA
FBgn0001321	knk	3R	10122365	10125664	-	2674	11.506	4.3029	1.71926	0.642954	-2.68015	0.818919	0.00106493	0.0028946	4.33228	1.62015	-1.42496	0.72312	0.0487731	0.0982784
FBgn0001323	knrl	3L	20597141	20620659	-	3909	0.983392	0.251571	0	0	-2.66925	3.52149	0.448457	NA	0	0	-2.36412	3.52154	0.502009	NA
FBgn0001324	kto	3L	19836614	19844944	+	7776	2458.33	316.144	2135.83	274.67	-0.204066	0.0824706	0.0133458	0.0292944	1982.94	255.008	-0.312027	0.0829793	0.000169712	0.0005973
FBgn0001325	Kr	2R	25226611	25231394	+	4411	0.717048	0.162559	0.951226	0.215649	0.395664	1.72002	0.818065	0.87571	2.31345	0.524472	1.59868	1.64274	0.330466	0.46467
FBgn0001330	kz	X	2237858	2242035	-	3927	137.502	35.0146	184.162	46.8963	0.424721	0.148185	0.00415507	0.010151	162.402	41.3551	0.238754	0.152261	0.116868	0.205475
FBgn0001341	Mybbp1A	X	629773	633633	+	3680	380.425	103.376	980.223	266.365	1.35882	0.0967249	7.89493e-45	2.87585e-43	883.414	240.058	1.20773	0.0977938	4.88513e-35	1.78379e-33
FBgn0001404	egh	X	2588503	2599111	+	4662	4431.29	950.513	2231.34	478.623	-0.991064	0.0838566	3.13019e-32	7.11681e-31	1925.04	412.921	-1.2046	0.0844876	4.01168e-46	2.23843e-44
FBgn0001491	l(1)10Bb	X	11324294	11325308	-	934	71.8062	76.8803	97.3075	104.184	0.435424	0.203469	0.032355	0.0642233	88.0612	94.2839	0.291104	0.208536	0.162732	0.267415
FBgn0001565	Hlc	X	21385518	21387946	-	2116	693.337	327.664	763.514	360.829	0.13822	0.0995232	0.164887	0.258922	864.496	408.552	0.320716	0.0998119	0.00131263	0.00393868
FBgn0001612	Grip91	X	13736570	13744683	-	3571	109.844	30.7599	71.992	20.1602	-0.589888	0.194634	0.00243938	0.00621652	66.1825	18.5333	-0.722556	0.201541	0.000336878	0.00112846
FBgn0001624	dlg1	X	11369665	11409776	+	11505	5052.77	439.18	5472.87	475.694	0.113852	0.0690854	0.0993533	0.169588	5543.14	481.802	0.132882	0.0692383	0.0549584	0.108995
FBgn0001941	ifc	2L	5986348	5988854	+	2201	3725.72	1692.74	1927.85	875.899	-0.952612	0.0701155	4.82784e-42	1.58788e-40	2258.81	1026.26	-0.72217	0.0702007	8.04583e-25	1.73343e-23
FBgn0001942	eIF4A	2L	5981764	5985909	+	2480	24589.9	9915.3	30218.9	12185	0.297292	0.0538014	3.28114e-08	1.62665e-07	33971.4	13698.1	0.466149	0.0538158	4.63826e-18	6.58103e-17
FBgn0001961	Arpc1	2L	13827941	13829741	-	1732	2683.4	1549.31	1989.32	1148.57	-0.429416	0.0658311	6.89166e-11	4.29429e-10	2403.39	1387.64	-0.157878	0.065856	0.0165156	0.0381473
FBgn0001965	Sos	2L	13813816	13819824	+	5635	1477.45	262.192	1908.57	338.7	0.365956	0.0734006	6.17283e-07	2.68211e-06	1808.6	320.959	0.290425	0.0739836	8.65394e-05	0.000322619
FBgn0001967	NimC3	2L	14019357	14020208	-	852	5.77857	6.78236	2.90492	3.40953	-1.03356	1.01375	0.307944	0.426381	1.56291	1.8344	-1.87526	1.12351	0.0950968	0.173176
FBgn0001970	Pgant35A	2L	14359252	14361411	+	2160	85.1965	39.4428	56.7165	26.2576	-0.5758	0.214404	0.00724038	0.0168384	56.8591	26.3237	-0.568408	0.219615	0.00964778	0.0237342
FBgn0001977	CIAPIN1	2L	15036293	15038861	-	2358	497.909	211.157	564.879	239.559	0.179601	0.0964341	0.062544	0.114015	609.266	258.382	0.293783	0.0971235	0.00248764	0.00704312
FBgn0001978	stc	2L	15113480	15118069	+	4145	1571.7	379.179	2000.19	482.556	0.347371	0.0705036	8.3506e-07	3.5539e-06	2071.91	499.857	0.398814	0.0708638	1.82428e-08	1.11022e-07
FBgn0001981	esg	2L	15333866	15336138	+	2273	14.6745	6.45599	14.6468	6.44381	-0.0133355	0.466565	0.977198	0.985868	8.61385	3.78964	-0.761821	0.509187	0.134614	0.230261
FBgn0001983	wor	2L	15423297	15425580	-	2222	4.47765	2.01514	2.5499	1.14757	-0.822202	1.04845	0.43292	0.555106	0.64912	0.292133	-2.78635	1.38898	0.0448518	0.0914155
FBgn0001986	Mtr4	2L	15752263	15755900	+	3585	341.186	95.1704	585.959	163.447	0.774019	0.0990001	5.35113e-15	4.62052e-14	572.761	159.766	0.7395	0.100242	1.61714e-13	1.60454e-12
FBgn0001987	Gli	2L	15756002	15762758	-	4468	559.425	125.207	199.294	44.6048	-1.49757	0.137137	9.22289e-28	1.72619e-26	280.758	62.8375	-0.993168	0.135719	2.52011e-13	2.44838e-12
FBgn0001989	ND-B17	2L	15749319	15751078	-	992	761.458	767.598	622.936	627.96	-0.287174	0.0981371	0.00343074	0.00850198	1040.34	1048.73	0.454464	0.0968739	2.71484e-06	1.26176e-05
FBgn0001990	wek	2L	15766133	15768349	-	2033	206.046	101.351	272.343	133.961	0.402925	0.120026	0.000787996	0.00218749	242.582	119.322	0.238151	0.123266	0.0533573	0.106116
FBgn0001991	Ca-alpha1D	2L	16165831	16190540	+	10481	3164.1	301.889	4230.44	403.63	0.418356	0.0592698	1.68304e-12	1.20541e-11	2620.01	249.977	-0.272803	0.0603669	6.21059e-06	2.7568e-05
FBgn0001992	Cyp303a1	2L	16294183	16296969	+	2787	0	0	0	0	NA	NA	NA	NA	0	0	NA	NA	NA	NA
FBgn0001994	crp	2L	16263556	16287730	-	4402	5185.68	1178.03	4542.81	1031.99	-0.19257	0.0788686	0.0146201	0.0318032	4044.02	918.678	-0.359591	0.0791622	5.56016e-06	2.49091e-05
FBgn0001995	mRpL4	2L	16328059	16329132	-	1012	105.884	104.628	126.042	124.547	0.253604	0.174793	0.146813	0.234786	124.205	122.732	0.231794	0.177951	0.19272	0.304598
FBgn0002021	l(2)37Bb	2L	19049843	19051612	-	1708	439.174	257.127	433.681	253.912	-0.00966157	0.111921	0.931208	0.955561	515.179	301.627	0.234655	0.112119	0.0363563	0.0760671
FBgn0002022	Catsup	2L	19041862	19043614	+	1698	1569.93	924.576	1995.69	1175.32	0.347625	0.064361	6.62062e-08	3.20254e-07	1845.42	1086.82	0.233521	0.0650738	0.000332518	0.00111498
FBgn0002023	Lim3	2L	19079256	19108427	-	4281	0	0	0.355025	0.0829304	0.39891	2.62286	0.879116	0.918805	1.26829	0.296261	2.53624	2.457	0.301954	NA
FBgn0002031	l(2)37Cc	2L	19121345	19123869	-	2119	4718.29	2226.66	4611.62	2176.32	-0.0334291	0.0742205	0.65242	0.747609	5497.1	2594.19	0.220971	0.0742377	0.00291529	0.00811282
FBgn0002036	CG10561	2L	19114401	19116570	+	2052	51.6055	25.1489	33.4213	16.2872	-0.613409	0.291385	0.0352784	0.0693356	34.4332	16.7803	-0.585719	0.29734	0.0488542	0.0983621
FBgn0002044	swm	2L	19493251	19497978	+	4249	1904.24	448.162	2181.47	513.409	0.194775	0.0672555	0.003779	0.00929701	2165.17	509.572	0.185095	0.0677008	0.00625674	0.0160948
FBgn0002069	AspRS	2R	12877004	12883168	+	2266	1282.68	566.055	792.686	349.817	-0.695189	0.07551	3.36652e-20	4.11225e-19	1017.67	449.105	-0.335984	0.0752982	8.11823e-06	3.53797e-05
FBgn0002121	l(2)gl	2L	9839	21376	-	5986	1241.52	207.404	1369.57	228.795	0.14052	0.0698475	0.0442395	0.0843539	1152.51	192.534	-0.107237	0.0711841	0.131944	0.226451
FBgn0002174	CG5504	2R	23706913	23709026	+	2070	888.354	429.156	1203.76	581.525	0.441611	0.0797912	3.11967e-08	1.55114e-07	1220.59	589.659	0.461808	0.0803994	9.25107e-09	5.8153e-08
FBgn0002183	dre4	3L	1871574	1876312	-	3690	4085.89	1107.29	5331.47	1444.84	0.384372	0.0590678	7.65115e-11	4.74717e-10	5052.59	1369.27	0.306371	0.0593277	2.41671e-07	1.28426e-06
FBgn0002283	l(3)73Ah	3L	16588475	16590132	+	1404	143.691	102.344	127.425	90.7583	-0.167999	0.158618	0.289533	0.407101	176.413	125.65	0.301945	0.157049	0.0545276	0.108227
FBgn0002284	Prosbeta6	3L	16609400	16610418	-	944	1443.83	1529.48	1131.65	1198.78	-0.348288	0.0804022	1.47884e-05	5.32772e-05	1229.37	1302.3	-0.231178	0.0807988	0.00422101	0.0113398
FBgn0002306	sas	3R	7162808	7183702	+	6236	2.55066	0.409022	1.0841	0.173845	-1.20586	1.42012	0.39581	0.51776	0.943733	0.151336	-1.34596	1.48522	0.364812	0.499698
FBgn0002354	l(3)87Df	3R	13030913	13031598	+	551	26.5576	48.199	36.104	65.5246	0.460744	0.326181	0.157791	0.24985	41.4068	75.1485	0.647823	0.328097	0.0483264	0.0975168
FBgn0002413	dco	3R	31054085	31061210	-	4783	3303.08	690.587	4136.33	864.799	0.323021	0.076577	2.46212e-05	8.58996e-05	3935.72	822.856	0.251921	0.0768297	0.00104191	0.00318605
FBgn0002431	hyd	3R	9714623	9725615	-	9083	2957.65	325.625	3283.6	361.511	0.150482	0.0569585	0.00824274	0.0189313	2993.03	329.52	0.0162702	0.0574753	0.777115	0.850672
FBgn0002440	l(3)mbn	3L	6123934	6128807	-	2321	6.92326	2.98288	1.33755	0.576283	-2.38516	1.09534	0.0294399	0.059212	0	0	-5.23898	1.4718	0.00037147	0.00123682
FBgn0002441	l(3)mbt	3R	27266326	27273273	-	5398	1068.01	197.853	975.5	180.715	-0.132203	0.0758544	0.0813606	0.142982	980.852	181.707	-0.123199	0.0766854	0.108154	0.192818
FBgn0002466	sti	3L	12507998	12514815	-	6084	1920.25	315.624	2476.95	407.125	0.367599	0.0752002	1.01723e-06	4.28257e-06	2227.51	366.126	0.213724	0.0757464	0.00477879	0.01265
FBgn0002521	pho	4	1172469	1181628	-	2381	888.906	373.333	1003.77	421.577	0.175078	0.0788297	0.0263535	0.0538137	914.1	383.914	0.041356	0.0800555	0.605441	0.719632
FBgn0002522	lab	3R	6661427	6678590	-	3046	2.17224	0.713145	0	0	-3.88407	2.33477	0.0961969	0.164976	0	0	-3.57892	2.33479	0.125308	0.217117
FBgn0002524	lace	2L	15499127	15505018	+	2991	1516.42	506.995	930.287	311.029	-0.703409	0.0819569	9.26911e-18	9.63211e-17	954.513	319.128	-0.668402	0.0826778	6.24636e-16	7.51075e-15
FBgn0002525	Lam	2L	5542480	5546642	+	3737	15001.8	4014.39	21050.5	5632.99	0.488508	0.0810674	1.6812e-09	9.33666e-09	17965	4807.33	0.259848	0.081139	0.0013624	0.00407447
FBgn0002526	LanA	3L	6203831	6218022	-	11690	8743.42	747.94	14957.1	1279.48	0.774295	0.0639923	1.05842e-33	2.55504e-32	13148.9	1124.8	0.588173	0.0641075	4.52444e-20	7.35462e-19
FBgn0002531	Lcp1	2R	8430115	8431243	-	1065	0	0	0	0	NA	NA	NA	NA	0	0	NA	NA	NA	NA
FBgn0002533	Lcp2	2R	8433797	8434785	-	927	0	0	0	0	NA	NA	NA	NA	0	0	NA	NA	NA	NA
FBgn0002534	Lcp3	2R	8435310	8436095	+	730	0	0	0.355025	0.486336	0.398902	4.08046	0.922124	NA	0	0	0	4.08052	1	NA
FBgn0002535	Lcp4	2R	8437647	8438495	+	792	0	0	0	0	NA	NA	NA	NA	0	0	NA	NA	NA	NA
FBgn0002542	lds	3R	7920431	7924491	+	3543	632.58	178.544	998.596	281.85	0.657295	0.0790848	9.4677e-17	9.153e-16	908.931	256.543	0.52085	0.0803229	8.90526e-11	6.91532e-10
FBgn0002543	robo2	2L	1380086	1420453	-	6206	38.5717	6.21523	10.5157	1.69443	-1.85379	0.389558	1.94842e-06	7.91121e-06	18.2163	2.93528	-1.08602	0.370815	0.00340339	0.00930172
FBgn0002552	lin	2R	8914524	8918234	+	3654	452.677	123.885	493.439	135.041	0.128449	0.0932851	0.168526	0.263578	508.845	139.257	0.169559	0.0944668	0.0726692	0.138606
FBgn0002561	l(1)sc	X	409721	410817	+	1097	0	0	0	0	0	4.08046	1	NA	0.37527	0.342087	0.704067	4.08052	0.86301	NA
FBgn0002562	Lsp1alpha	X	12490291	12492982	+	2625	0	0	0	0	NA	NA	NA	NA	0	0	NA	NA	NA	NA
FBgn0002563	Lsp1beta	2L	898500	901316	+	2749	0	0	0	0	NA	NA	NA	NA	0	0	NA	NA	NA	NA
FBgn0002564	Lsp1gamma	3L	66430	68995	+	2501	12.5175	5.00499	8.88568	3.55285	-0.473894	0.542983	0.382794	0.504648	10.7225	4.28729	-0.2348	0.545543	0.666907	0.768183
FBgn0002565	Lsp2	3L	12129393	12131869	+	2477	0	0	0.355025	0.143329	0.398908	3.61685	0.912178	NA	0.37527	0.151502	0.704068	3.61689	0.845658	NA
FBgn0002566	lt	2L	22924795	22943135	+	5368	1609.26	299.787	1503.7	280.123	-0.0941807	0.0749066	0.208642	0.313163	1497.63	278.992	-0.102447	0.0754831	0.174711	0.28222
FBgn0002567	Rab32	2R	9177864	9186342	-	4081	30.4749	7.46751	8.52854	2.08982	-1.87345	0.445952	2.65719e-05	9.23249e-05	11.1094	2.72222	-1.47048	0.44115	0.000858271	0.00266053
FBgn0002569	Mal-A2	2R	8453627	8455782	+	2036	0	0	0.608483	0.298862	1.43432	3.83034	0.708059	NA	0	0	0	3.886	1	NA
FBgn0002570	Mal-A1	2R	8449664	8451904	-	1826	0	0	0	0	NA	NA	NA	NA	0	0	NA	NA	NA	NA
FBgn0002571	Mal-A3	2R	8455909	8457892	-	1795	0	0	0	0	NA	NA	NA	NA	0	0	NA	NA	NA	NA
FBgn0002573	sens	3L	13396228	13401125	-	2451	0	0	0	0	NA	NA	NA	NA	0	0	NA	NA	NA	NA
FBgn0002576	lz	X	9284649	9303636	+	3468	10.4374	3.00964	4.0157	1.15793	-1.33168	0.467232	0.00436992	0.0106095	918.614	264.883	6.42447	0.297487	1.9657e-103	4.88084e-101
FBgn0002577	m	X	11754273	11769508	+	3405	9.45283	2.77616	0.86194	0.25314	-3.53973	1.09477	0.00122369	0.00328919	1.33398	0.39177	-2.82581	1.01678	0.00544993	0.0142332
FBgn0002578	Kaz-m1	3R	26014721	26016487	+	1705	0	0	0.355025	0.208226	0.398909	2.14235	0.852287	0.900487	2.71866	1.59452	3.61387	1.86019	0.0520471	0.104052
FBgn0002579	RpL36	X	628338	629483	-	686	2007.28	2926.07	1886.86	2750.53	-0.0864815	0.0796666	0.277681	0.3942	2141.91	3122.32	0.0945975	0.0798104	0.235907	0.357694
FBgn0002590	RpS5a	X	17143588	17148264	-	1386	8326.65	6007.68	9548.58	6889.31	0.197564	0.0654488	0.00253942	0.00644882	11374.2	8206.5	0.450371	0.0654584	5.97466e-12	5.19163e-11
FBgn0002592	E(spl)m2-BFM	3R	26016514	26017470	-	957	12.5022	13.064	24.8329	25.9487	0.979125	0.36451	0.0072282	0.0168178	101.476	106.035	3.03946	0.341426	5.47255e-19	8.14893e-18
FBgn0002593	RpLP1	2L	419952	420864	+	768	1903.92	2479.06	2165.3	2819.41	0.186365	0.101691	0.0668546	0.120661	2617.24	3407.86	0.458916	0.101702	6.41046e-06	2.84362e-05
FBgn0002609	E(spl)m3-HLH	3R	26021823	26023127	+	1305	10.4163	7.98186	15.0607	11.5408	0.474293	0.466585	0.309382	0.427883	29.5696	22.6587	1.48183	0.450405	0.00100187	0.00307324
FBgn0002622	RpS3	3R	23358812	23360207	+	1133	12453.2	10991.4	15475.3	13658.7	0.313138	0.0707063	9.48006e-06	3.50859e-05	16601.8	14652.9	0.414792	0.0707414	4.53198e-09	2.95158e-08
FBgn0002626	RpL32	3R	30045229	30046161	-	796	4036.46	5070.93	4202.71	5279.79	0.0594709	0.0896243	0.506974	0.624247	5245	6589.2	0.378331	0.0896055	2.41954e-05	9.75674e-05
FBgn0002629	E(spl)m4-BFM	3R	26023821	26024579	-	759	0	0	0	0	NA	NA	NA	NA	0	0	NA	NA	NA	NA
FBgn0002631	E(spl)m5-HLH	3R	26028854	26029735	-	882	0	0	0.355025	0.402523	0.398902	4.08046	0.922124	NA	0	0	0	4.08052	1	NA
FBgn0002632	E(spl)m6-BFM	3R	26032911	26034047	+	1137	0	0	0.253458	0.222918	0.398902	4.08046	0.922124	NA	0	0	0	4.08052	1	NA
FBgn0002633	E(spl)m7-HLH	3R	26037038	26038019	+	982	3.16969	3.22779	0.71005	0.723065	-2.41499	1.5453	0.118101	0.195706	1.39966	1.42532	-1.21108	1.39726	0.386076	0.521418
FBgn0002638	Rcc1	3L	5930262	5932773	-	2365	1267.76	536.052	1608.47	680.116	0.344045	0.064889	1.14503e-07	5.41503e-07	1470.94	621.961	0.214627	0.065806	0.00110821	0.00336805
FBgn0002641	mal	X	20429675	20433210	+	3209	154.399	48.1142	98.6675	30.7471	-0.636136	0.164997	0.000115527	0.00036599	122.064	38.038	-0.341102	0.165076	0.038797	0.0805185
FBgn0002643	mam	2R	13991203	14060356	+	8869	4562.75	514.461	7357.5	829.575	0.6882	0.0807682	1.58625e-17	1.62511e-16	8692.19	980.064	0.929379	0.0807823	1.24875e-30	3.58457e-29
FBgn0002645	Map205	3R	32055279	32068441	-	6046	5779.29	955.886	2904.97	480.478	-0.993903	0.0805321	5.40066e-35	1.37907e-33	2821.55	466.681	-1.03448	0.0808419	1.718e-37	6.85269e-36
FBgn0002673	twe	2L	16259414	16261877	-	2379	221.539	93.1226	201.902	84.8685	-0.142717	0.135052	0.290622	0.40835	175.578	73.8033	-0.343157	0.139275	0.0137439	0.0324161
FBgn0002707	mei-9	X	4314230	4318801	-	3606	193.113	53.5532	206.36	57.2268	0.099638	0.130507	0.445184	0.566401	225.108	62.4258	0.221889	0.13187	0.0924457	0.168999
FBgn0002709	mei-218	X	17135985	17142990	-	6310	15.8563	2.51288	12.791	2.02709	-0.353403	0.491919	0.4725	0.591964	13.7078	2.17239	-0.21234	0.497234	0.669349	0.769202
FBgn0002715	mei-S332	2R	22122101	22124566	+	1703	415.032	243.707	709.895	416.85	0.770057	0.106261	4.26521e-13	3.20143e-12	541.8	318.144	0.379448	0.108515	0.000471	0.00153628
FBgn0002716	mei-W68	2R	19456170	19459523	+	2300	30.169	13.117	25.203	10.9578	-0.251191	0.361796	0.4875	0.606199	13.7527	5.97943	-1.09974	0.397964	0.00571977	0.0148675
FBgn0002719	Men	3R	12713103	12722442	-	3074	6787.43	2208.01	1895.03	616.47	-1.84122	0.0600851	3.23035e-206	1.82389e-203	3736.57	1215.54	-0.861101	0.0591208	4.68201e-48	2.80131e-46
FBgn0002723	Met	X	11616124	11621280	+	5088	465.064	91.404	350.178	68.8242	-0.411489	0.101092	4.69231e-05	0.000157855	452.05	88.8464	-0.0415535	0.100696	0.679854	0.7772
FBgn0002732	E(spl)malpha-BFM	3R	26010893	26011568	+	676	3.6403	5.38505	1.1154	1.65	-1.73008	1.18721	0.145043	0.23259	2.66795	3.94668	-0.4344	1.07428	0.685944	0.781822
FBgn0002733	E(spl)mbeta-HLH	3R	26005046	26006023	-	978	73.689	75.3467	76.1243	77.8367	0.0406341	0.202264	0.84078	0.892079	110.756	113.247	0.589086	0.199336	0.00312428	0.00860998
FBgn0002734	E(spl)mdelta-HLH	3R	25997621	25998633	+	1013	12.8166	12.6521	10.0278	9.89907	-0.276291	0.565226	0.624973	0.724674	9.13546	9.01822	-0.451558	0.583936	0.439345	0.574759
FBgn0002735	E(spl)mgamma-HLH	3R	25999851	26000761	+	911	119.362	131.023	127.281	139.716	0.0775014	0.169897	0.648269	0.744195	154.228	169.295	0.3608	0.170031	0.0338407	0.0714717
FBgn0002736	mago	2R	21128577	21129737	+	1103	638.245	578.644	1487.44	1348.54	1.22387	0.0821955	3.84236e-50	1.6688e-48	1387.62	1258.05	1.12182	0.0829179	1.05032e-41	4.94396e-40
FBgn0002772	Mlc1	3R	27657078	27660177	-	1414	1.22281	0.864785	0.253458	0.179249	-2.05264	2.07191	0.321832	0.44152	1.0751	0.760325	-0.208619	1.89005	0.91211	0.942402
FBgn0002773	Mlc2	3R	30171438	30174551	-	2286	14.6885	6.42542	16.1156	7.04971	0.136969	0.450483	0.761091	0.834589	17.2823	7.56004	0.225977	0.456579	0.620646	0.733491
FBgn0002774	mle	2R	5974857	5980778	-	4641	1347.86	290.425	1188.37	256.059	-0.180196	0.0850549	0.0341258	0.06737	1179.61	254.171	-0.193401	0.0857092	0.0240405	0.0530835
FBgn0002775	msl-3	3L	7123213	7125533	-	1970	362.191	183.853	487.966	247.698	0.431484	0.143992	0.0027303	0.00689051	399.498	202.791	0.138166	0.145992	0.343948	0.477976
FBgn0002778	mnd	3L	14985100	14991667	+	2546	104.587	41.0788	201.983	79.3336	0.938493	0.150277	4.2356e-10	2.48823e-09	229.631	90.1927	1.12857	0.150998	7.77369e-14	7.92693e-13
FBgn0002780	mod	3R	32052060	32054974	+	2287	4196.02	1834.73	7373.56	3224.12	0.813877	0.0873271	1.16486e-20	1.45974e-19	5481.34	2396.74	0.385416	0.0876111	1.08669e-05	4.64813e-05
FBgn0002781	mod(mdg4)	3R	21350846	21377401	-	16924	1610.44	95.1573	3041.85	179.736	0.917087	0.0605512	8.09423e-52	3.62386e-50	2640.91	156.045	0.712844	0.0611789	2.24656e-31	6.8235e-30
FBgn0002783	mor	3R	15968134	15972913	-	3983	1739.2	436.655	3319.33	833.374	0.931854	0.0644932	2.54858e-47	9.92384e-46	3065.52	769.65	0.817436	0.0649204	2.35618e-36	9.0006e-35
FBgn0002787	Rpn8	2R	24400028	24404527	+	1532	1874.52	1223.57	1403.84	916.342	-0.416412	0.0867959	1.60579e-06	6.5805e-06	1483.93	968.624	-0.338837	0.0871618	0.000101303	0.000372509
FBgn0002789	Mp20	2R	13246670	13248880	+	948	11.4759	12.1053	0	0	-6.24974	1.42277	1.11974e-05	4.09938e-05	0.684856	0.722422	-4.08486	1.29382	0.00159285	0.00469999
FBgn0002791	mr	2R	23972431	23975408	+	2555	358.77	140.419	359.954	140.882	0.011205	0.106898	0.916519	0.945739	336.643	131.759	-0.0896575	0.109202	0.411635	0.54745
FBgn0002838	ms(3)K81	3R	26875852	26876562	+	711	0	0	0	0	0	3.18256	1	NA	1.0751	1.5121	2.26553	3.06577	0.459922	NA
FBgn0002842	sa	3L	21405425	21406738	-	956	0	0	0	0	0	4.08046	1	NA	0.32456	0.339498	0.704067	4.08052	0.86301	NA
FBgn0002855	Acp26Aa	2L	5892883	5893896	-	958	0	0	0.222156	0.231895	0.398902	4.08046	0.922124	NA	0	0	0	4.08052	1	NA
FBgn0002856	Acp26Ab	2L	5892298	5892862	-	504	0	0	0	0	NA	NA	NA	NA	0	0	NA	NA	NA	NA
FBgn0002862	Mst87F	3R	13827151	13828008	-	623	0	0	0	0	NA	NA	NA	NA	0	0	NA	NA	NA	NA
FBgn0002863	Acp95EF	3R	24228975	24229279	+	243	0	0	0.222156	0.91422	0.398902	4.08046	0.922124	NA	0	0	0	4.08052	1	NA
FBgn0002865	Mst98Ca	3R	28291338	28292656	+	1319	0	0	0	0	0	4.08046	1	NA	0.32456	0.246065	0.704067	4.08052	0.86301	NA
FBgn0002868	MtnA	3R	9783407	9784370	-	700	166.149	237.356	22.7315	32.4736	-2.84804	0.27764	1.0891e-24	1.72677e-23	34.9886	49.9837	-2.24603	0.269354	7.51944e-17	9.68652e-16
FBgn0002869	MtnB	3R	20503102	20503746	-	584	0	0	0	0	NA	NA	NA	NA	0	0	NA	NA	NA	NA
FBgn0002872	mu2	3L	1942734	1947475	-	4117	786.922	191.14	1153.01	280.061	0.549049	0.0737432	9.66347e-14	7.62499e-13	1061.96	257.944	0.429832	0.0748394	9.28029e-09	5.82629e-08
FBgn0002873	mud	X	14247732	14258595	+	8895	2587.69	290.915	3560.35	400.264	0.458996	0.0729564	3.14676e-10	1.87149e-09	3081.99	346.485	0.251083	0.0734047	0.000624995	0.00199468
FBgn0002878	mus101	X	13722246	13727113	+	4868	133.64	27.4528	177.114	36.3832	0.392653	0.152921	0.0102379	0.0230091	147.973	30.3971	0.142376	0.157709	0.366644	0.501516
FBgn0002887	mus201	2L	8438169	8442342	+	3950	312.471	79.1066	436.476	110.5	0.4832	0.101363	1.86951e-06	7.60603e-06	400.954	101.507	0.360145	0.103504	0.000502278	0.00163294
FBgn0002891	DNApol-zeta	2R	7793625	7801044	+	6750	373.27	55.2992	336.048	49.7849	-0.153599	0.10653	0.149348	0.238464	395.309	58.5643	0.0809285	0.106879	0.44893	0.583686
FBgn0002899	mus301	3L	8137808	8142014	+	3364	122.333	36.3652	161.438	47.9899	0.400034	0.154261	0.0095081	0.0215213	149.063	44.3112	0.279592	0.15803	0.076855	0.145091
FBgn0002901	mus304	3L	18109814	18112847	+	2816	62.6185	22.2367	53.752	19.0881	-0.213875	0.233338	0.359359	0.480927	72.4997	25.7456	0.209878	0.231498	0.364615	0.499635
FBgn0002905	DNApol-theta	3R	12705523	12712299	-	6420	438.549	68.3098	349.017	54.364	-0.33472	0.117705	0.00445921	0.010816	335.715	52.2921	-0.390339	0.119587	0.00109831	0.00334102
FBgn0002906	Blm	3R	11736810	11741783	-	4806	276.989	57.634	386.5	80.4203	0.4825	0.117266	3.87875e-05	0.000131883	366.595	76.2786	0.399877	0.119118	0.000787972	0.00246182
FBgn0002909	mus312	3L	7329132	7333471	+	4022	0	0	0	0	NA	NA	NA	NA	0	0	NA	NA	NA	NA
FBgn0002914	Myb	X	15854832	15857823	-	2928	0	0	0	0	NA	NA	NA	NA	0	0	NA	NA	NA	NA
FBgn0002917	na	X	14266367	14277416	+	7875	12.3901	1.57335	1.52841	0.194083	-2.9637	0.789594	0.000174413	0.000536003	8.73024	1.1086	-0.504093	0.592217	0.39466	0.530558
FBgn0002921	Atpalpha	3R	20948714	20976239	+	6680	14081	2107.93	12591.2	1884.91	-0.161704	0.0776401	0.0372745	0.0727522	12766.4	1911.14	-0.141694	0.0776987	0.0682078	0.131312
FBgn0002922	nau	3R	23712814	23718357	-	1532	0	0	0	0	0	4.08046	1	NA	0.309586	0.20208	0.704067	4.08052	0.86301	NA
FBgn0002924	ncd	3R	29804290	29807127	-	2720	870.363	319.987	1481.42	544.639	0.763351	0.0765419	2.00129e-23	2.97355e-22	1274.67	468.63	0.547327	0.0775917	1.73925e-12	1.57039e-11
FBgn0002926	ndl	3L	6593938	6603366	-	8230	1.70747	0.207469	0	0	-3.47419	1.97149	0.0780331	0.13785	1.06013	0.128812	-0.684084	1.78141	0.70097	0.7926
FBgn0002930	nec	2R	7156477	7158241	-	1633	3.95783	2.42365	1.91473	1.17253	-1.11278	1.16879	0.341055	0.461599	2.19705	1.34541	-0.859812	1.17314	0.46361	0.597552
FBgn0002931	net	2L	82421	87387	-	2225	88.4685	39.7611	13.8238	6.21295	-2.69607	0.302307	4.73383e-19	5.29262e-18	18.0232	8.10029	-2.29423	0.298238	1.44164e-14	1.54794e-13
FBgn0002932	neur	3R	9020348	9039471	-	4309	339.909	78.8834	285.075	66.158	-0.261363	0.116136	0.0244173	0.0503221	529.366	122.851	0.640948	0.113137	1.46829e-08	9.04096e-08
FBgn0002933	ng1	X	3242412	3242934	+	523	0	0	0	0	NA	NA	NA	NA	0	0	NA	NA	NA	NA
FBgn0002936	ninaA	2L	877302	878270	+	871	0.717048	0.823247	1.0841	1.24466	0.490856	1.70924	0.773976	0.843983	1.69427	1.9452	1.13628	1.67651	0.497918	0.627973
FBgn0002937	ninaB	3R	13700565	13703164	+	2164	0.491696	0.227216	0.222156	0.10266	-0.562884	1.76206	0.749388	0.82628	16.0232	7.40441	5.21047	1.32708	8.62721e-05	0.000321884
FBgn0002938	ninaC	2L	7377702	7384344	+	5425	0.85022	0.156723	0	0	-2.48573	3.37559	0.461496	NA	0	0	-2.1806	3.37563	0.518291	NA
FBgn0002939	ninaD	2L	18081628	18083608	+	1788	0	0	0	0	NA	NA	NA	NA	0	0	NA	NA	NA	NA
FBgn0002940	ninaE	3R	19886255	19888206	-	1588	0	0	0.222156	0.139896	0.398902	4.08046	0.922124	NA	0	0	0	4.08052	1	NA
FBgn0002941	slou	3R	21548661	21557182	-	2670	0.724079	0.271191	0.222156	0.0832043	-1.34952	3.01654	0.654607	NA	0	0	-2.00615	3.01657	0.506024	NA
FBgn0002945	nkd	3L	19003741	19045449	-	5062	256.024	50.5775	617.968	122.08	1.27073	0.104154	3.08757e-34	7.59782e-33	548.764	108.408	1.09899	0.105821	2.88932e-25	6.33482e-24
FBgn0002948	nod	X	11580772	11585750	+	2449	396.06	161.723	404.237	165.062	0.0233497	0.106089	0.825796	0.88078	372.056	151.922	-0.091121	0.108248	0.39991	0.535803
FBgn0002962	nos	3R	19157238	19160202	+	2349	6.06482	2.58187	2.28878	0.974363	-1.35118	0.869213	0.120067	0.19851	5.8295	2.48169	-0.0270437	0.796775	0.972924	0.98232
FBgn0002973	numb	2L	9437469	9464184	+	4916	403.034	81.9842	792.135	161.134	0.969413	0.0863265	2.91748e-29	5.83668e-28	938.554	190.918	1.21586	0.0864631	6.48802e-45	3.42761e-43
FBgn0002985	odd	2L	3604224	3606756	-	2347	27.9277	11.8993	15.5532	6.62686	-0.880203	0.431895	0.0415497	0.0800815	13.616	5.80145	-1.02205	0.447225	0.0222941	0.0497697
FBgn0002989	okr	2L	2989594	2992759	-	2878	116.329	40.4203	134.92	46.8798	0.209323	0.167087	0.210287	0.314981	121.042	42.0577	0.050727	0.171706	0.767666	0.843921
FBgn0003002	opa	3R	4852813	4869979	+	2939	0	0	0.253458	0.0862394	0.39891	3.08197	0.897015	NA	0.684856	0.233024	1.62129	3.02299	0.591736	NA
FBgn0003008	or	2R	23967939	23968943	+	823	245.176	297.906	189.096	229.764	-0.36433	0.151621	0.0162653	0.0350125	210.167	255.367	-0.222913	0.152721	0.144398	0.243317
FBgn0003009	ord	2R	23271257	23275536	-	3915	0	0	0	0	NA	NA	NA	NA	0	0	NA	NA	NA	NA
FBgn0003011	ort	3R	19659748	19663672	+	2158	0.85022	0.393985	0.799336	0.370406	-0.0318157	1.73973	0.985409	0.990958	1.95315	0.905074	1.27674	1.63471	0.434792	0.570538
FBgn0003015	osk	3R	8935126	8938395	+	2869	0.365555	0.127416	0	0	-1.52464	4.08046	0.708668	NA	0	0	-1.21951	4.08052	0.765046	NA
FBgn0003016	osp	2L	14599196	14689340	-	6846	433.633	63.3411	1338.76	195.554	1.61827	0.0855269	7.63765e-80	6.57809e-78	1098.95	160.524	1.33544	0.0867339	1.71443e-53	1.25204e-51
FBgn0003023	otu	X	8485008	8489535	-	3420	4.26516	1.24712	0.608483	0.177919	-2.91454	1.3146	0.026619	0.0543012	5.50301	1.60907	0.401784	0.914263	0.660327	0.763325
FBgn0003028	ovo	X	5048273	5070929	+	7400	0.857251	0.115845	0.444311	0.060042	-0.633926	1.59492	0.691024	0.779626	10.9273	1.47666	3.7672	1.24074	0.00239534	0.00680311
FBgn0003034	SP	3L	13301635	13301922	+	223	0	0	0	0	NA	NA	NA	NA	0	0	NA	NA	NA	NA
FBgn0003041	pbl	3L	7896109	7911954	-	5781	1025.04	177.311	1966.16	340.107	0.936155	0.070528	3.29688e-40	9.94248e-39	2056.2	355.683	1.0008	0.0708725	2.81416e-45	1.5027e-43
FBgn0003042	Pc	3L	21306138	21318020	-	2462	157.883	64.1278	235.002	95.4515	0.562407	0.135044	3.11875e-05	0.00010748	239.722	97.369	0.59248	0.136851	1.49527e-05	6.23731e-05
FBgn0003044	Pcl	2R	18135426	18139990	+	4384	1015.24	231.58	1379.93	314.764	0.43984	0.0821407	8.56888e-08	4.09814e-07	1349.11	307.734	0.408175	0.0827649	8.15007e-07	4.0152e-06
FBgn0003046	Pcp	2L	7021682	7022470	+	718	0.358524	0.499337	0.86194	1.20047	0.967927	2.2164	0.662321	0.755717	1.23835	1.72472	1.55479	2.18858	0.477449	0.609737
FBgn0003048	pcx	X	2225296	2238045	+	12119	1906.94	157.351	1922.22	158.612	0.00970386	0.0802673	0.903775	0.937538	1814.01	149.683	-0.072922	0.0808069	0.366832	0.501599
FBgn0003053	peb	X	4617564	4627206	+	7446	36.9635	4.96421	4.20444	0.564657	-3.32897	0.438645	3.2189e-14	2.64033e-13	295.321	39.6618	2.9688	0.216403	7.82887e-43	3.94702e-41
FBgn0003057	CG10598	X	17225157	17226867	-	1711	0	0	0	0	NA	NA	NA	NA	0	0	NA	NA	NA	NA
FBgn0003060	CG9757	3R	13611583	13612433	-	851	0	0	0	0	NA	NA	NA	NA	0	0	NA	NA	NA	NA
FBgn0003062	Fib	2R	23072909	23074725	-	1318	611.949	464.301	1292.79	980.874	1.08235	0.0976517	1.50344e-28	2.91593e-27	1293.89	981.71	1.0804	0.0981523	3.5189e-28	8.91574e-27
FBgn0003065	CG2150	3R	31763304	31764772	-	1170	370.074	316.302	222.468	190.144	-0.736358	0.121178	1.22723e-09	6.89604e-09	152.871	130.659	-1.26956	0.129144	8.3118e-23	1.57845e-21
FBgn0003067	Pepck1	2R	18536767	18539416	+	2486	0	0	0	0	NA	NA	NA	NA	0	0	NA	NA	NA	NA
FBgn0003068	per	X	2685580	2692780	+	4527	79.616	17.5869	39.781	8.78749	-1.00608	0.236636	2.12244e-05	7.4897e-05	46.2061	10.2068	-0.793737	0.2386	0.000878992	0.00271798
FBgn0003071	Pfk	2R	10109740	10117457	+	4377	1570.05	358.704	731.96	167.229	-1.10031	0.0739382	4.34792e-50	1.88034e-48	1317.28	300.955	-0.254268	0.0722492	0.000432658	0.00142102
FBgn0003074	Pgi	2R	8910900	8914069	-	2460	1243.34	505.422	880.024	357.733	-0.500619	0.0739395	1.28197e-11	8.46564e-11	1096.96	445.92	-0.182722	0.0738648	0.013371	0.0316645
FBgn0003076	Pgm1	3L	16126018	16128531	-	1843	636.843	345.547	200.511	108.796	-1.65587	0.1145	2.11139e-47	8.28497e-46	304.296	165.109	-1.06553	0.112247	2.25004e-21	3.98348e-20
FBgn0003079	Raf	X	2295466	2343870	+	4247	426.449	100.412	681.277	160.414	0.678292	0.0870326	6.51594e-15	5.60724e-14	704.711	165.932	0.72716	0.0879175	1.3291e-16	1.67521e-15
FBgn0003082	phr	2R	7825289	7827319	+	1969	312.877	158.902	286.245	145.376	-0.125306	0.122305	0.305584	0.42398	253.684	128.839	-0.296179	0.125369	0.0181542	0.0415265
FBgn0003086	Pig1	X	3248600	3249289	-	690	0.491696	0.712603	0	0	-1.52464	4.08046	0.708668	NA	0	0	-1.21951	4.08052	0.765046	NA
FBgn0003087	pim	2L	10362989	10364092	+	978	118.691	121.361	138.338	141.45	0.224637	0.168059	0.181334	0.280053	124.309	127.105	0.0590593	0.172588	0.732202	0.817288
FBgn0003089	pip	3L	19298623	19337609	-	10964	0.731111	0.0666828	0.253458	0.0231173	-1.35562	3.23604	0.67528	NA	0	0	-2.01225	3.23608	0.534061	NA
FBgn0003090	pk	2R	7150703	7223378	+	6748	61.5992	9.12851	9.96	1.47599	-2.66268	0.346746	1.60272e-14	1.34062e-13	44.6563	6.61771	-0.453902	0.279353	0.104199	0.18694
FBgn0003091	Pkc53E	2R	16924655	16945126	+	5739	0.358524	0.0624715	0.253458	0.0441641	-0.562881	3.85889	0.884027	NA	0	0	-1.21951	3.85894	0.751986	NA
FBgn0003093	Pkc98E	3R	29039156	29049148	+	5772	1025.83	177.726	1347.72	233.493	0.388393	0.0888134	1.22475e-05	4.46776e-05	1067.51	184.947	0.0549311	0.0900925	0.542048	0.665728
FBgn0003114	plu	2R	20262958	20263684	-	616	1.34192	2.17844	0.253458	0.411457	-2.13872	2.1057	0.309782	0.428226	0.69983	1.13609	-0.906486	2.01623	0.653002	0.758375
FBgn0003116	pn	X	2181211	2182916	+	1638	58.1319	35.4895	60.3797	36.8618	0.0650533	0.237229	0.783915	0.851301	48.8123	29.7999	-0.239902	0.247351	0.332104	0.466411
FBgn0003117	pnr	3R	16026079	16041796	+	4361	1406.03	322.411	993.334	227.777	-0.505636	0.0826637	9.54824e-10	5.42419e-09	950.252	217.898	-0.56743	0.08362	1.15432e-11	9.7406e-11
FBgn0003118	pnt	3R	23290231	23346167	-	6119	4510.27	737.093	2593.74	423.884	-0.800196	0.0760237	6.58329e-26	1.10771e-24	2190.56	357.993	-1.04328	0.076665	3.57475e-42	1.71519e-40
FBgn0003124	polo	3L	20309654	20313466	+	2980	1729.81	580.472	2382.2	799.397	0.462077	0.0737551	3.72787e-10	2.20141e-09	1912.69	641.841	0.144678	0.0745969	0.0524444	0.104618
FBgn0003129	Poxm	3R	8319025	8333792	-	2566	0.491696	0.19162	0	0	-1.52464	4.08046	0.708668	NA	0	0	-1.21951	4.08052	0.765046	NA
FBgn0003130	Poxn	2R	15826693	15835055	-	2458	0.491696	0.200039	0	0	-1.52464	4.08046	0.708668	NA	0	0	-1.21951	4.08052	0.765046	NA
FBgn0003132	Pp1-13C	X	15359101	15361061	-	1892	0	0	0	0	NA	NA	NA	NA	0	0	NA	NA	NA	NA
FBgn0003134	Pp1alpha-96A	3R	24518270	24522331	+	3210	2265.98	705.914	2956.51	921.03	0.381615	0.0804959	2.12872e-06	8.6089e-06	2993.09	932.428	0.400779	0.0807393	6.91053e-07	3.44902e-06
FBgn0003137	Ppn	3R	28520665	28540324	-	9544	6200.65	649.691	4310.76	451.672	-0.525648	0.061634	1.48211e-17	1.52149e-16	4774.49	500.261	-0.377969	0.0617417	9.25402e-10	6.46805e-09
FBgn0003139	PpV	X	6371065	6372915	-	1675	961.75	574.179	1249.62	746.039	0.375761	0.0779146	1.41608e-06	5.85978e-06	1230.95	734.893	0.355532	0.0786145	6.11237e-06	2.71503e-05
FBgn0003140	PpY-55A	2R	17955396	17956570	-	1175	0	0	0	0	NA	NA	NA	NA	0	0	NA	NA	NA	NA
FBgn0003141	pr	2L	20073719	20075458	-	1073	615.144	573.293	392.629	365.917	-0.644752	0.0931016	4.35218e-12	2.99669e-11	421.158	392.505	-0.547138	0.0942453	6.41856e-09	4.1155e-08
FBgn0003145	prd	2L	12082995	12085827	-	2695	0	0	0.253458	0.0940473	0.398902	4.08046	0.922124	NA	0	0	0	4.08052	1	NA
FBgn0003149	Prm	3L	8732858	8745310	-	5356	1.93985	0.362184	0	0	-3.70494	2.0253	0.067351	0.121385	0.619173	0.115604	-1.60227	1.94921	0.411072	0.546935
FBgn0003159	CG2841	X	2344949	2366356	-	5650	803.601	142.23	527.771	93.4108	-0.604522	0.0929546	7.85217e-11	4.86892e-10	483.63	85.5982	-0.733651	0.0949063	1.0732e-14	1.16492e-13
FBgn0003162	Pu	2R	21175315	21182608	+	2152	4713.43	2190.26	1143.84	531.523	-2.04412	0.0938187	3.01829e-105	4.08999e-103	5678.58	2638.75	0.268591	0.0917794	0.00342815	0.00936168
FBgn0003165	pum	3R	9066343	9237682	-	11798	3029.29	256.763	1035.58	87.7762	-1.55072	0.0712267	4.31885e-105	5.77533e-103	2121.93	179.855	-0.514597	0.0696478	1.48418e-13	1.47409e-12
FBgn0003169	put	3R	14619030	14625703	-	4013	559.934	139.53	697.793	173.883	0.313942	0.091817	0.000628025	0.00177492	597.436	148.875	0.0936109	0.0936968	0.317755	0.451106
FBgn0003174	pwn	2R	7282572	7300806	+	5810	28.71	4.94148	82.099	14.1306	1.50169	0.240735	4.43355e-10	2.60301e-09	178.923	30.7956	2.62844	0.234379	3.46272e-29	9.27e-28
FBgn0003175	px	2R	22494297	22562065	-	10746	1333.02	124.048	2160.57	201.058	0.693337	0.0787557	1.32452e-18	1.44899e-17	2185.63	203.39	0.711018	0.0790996	2.49727e-19	3.81582e-18
FBgn0003187	qua	2L	17486806	17497208	-	3792	6.08007	1.60339	3.05681	0.806122	-0.987681	0.822561	0.229853	0.338108	5.30596	1.39925	-0.220907	0.792021	0.78031	0.85334
FBgn0003189	r	X	16655359	16668712	+	7126	498.54	69.9607	812.324	113.994	0.707336	0.0909188	7.26035e-15	6.21626e-14	824.446	115.696	0.726591	0.0917157	2.33328e-15	2.67292e-14
FBgn0003204	ras	X	10744502	10749097	+	2866	230.196	80.3195	290.334	101.303	0.34655	0.122788	0.00476732	0.0115002	241.266	84.1823	0.0755689	0.126553	0.550418	0.672817
FBgn0003205	Ras85D	3R	9510561	9513067	-	1958	2124.16	1084.86	1997.91	1020.38	-0.0890899	0.0720156	0.216053	0.321863	1784.8	911.54	-0.250221	0.0727375	0.000581605	0.0018676
FBgn0003206	Ras64B	3L	4139076	4141398	+	1620	1402.45	865.712	1301.26	803.25	-0.109194	0.0864385	0.206497	0.310632	1389.38	857.645	-0.0114612	0.0867959	0.894946	0.931134
FBgn0003209	raw	2L	8709880	8740660	-	5011	479.491	95.6877	474.997	94.7908	-0.0138462	0.102515	0.892561	0.929511	491.899	98.1638	0.0394372	0.103569	0.703366	0.794205
FBgn0003210	rb	X	4535635	4540626	-	4813	360.326	74.8651	363.747	75.5759	0.0140278	0.111595	0.899967	0.93416	387.371	80.4844	0.102004	0.112668	0.365282	0.500136
FBgn0003218	rdgB	X	13762752	13779488	+	9281	425.141	45.8077	253.306	27.293	-0.750658	0.105548	1.14392e-12	8.30999e-12	273.566	29.476	-0.638708	0.107019	2.39909e-09	1.60781e-08
FBgn0003227	rec	3R	15823019	15832632	-	4131	70.9911	17.185	114.28	27.6639	0.681891	0.197019	0.000538097	0.00153787	99.9424	24.1933	0.496143	0.201964	0.0140263	0.0330037
FBgn0003231	ref(2)P	2L	19542468	19545548	+	2395	2206.33	921.224	821.037	342.813	-1.42793	0.0738714	3.00731e-83	2.70472e-81	1040.17	434.309	-1.08543	0.0737134	4.45215e-49	2.78105e-47
FBgn0003248	Rh2	3R	18899423	18901019	+	1365	0	0	0	0	NA	NA	NA	NA	0	0	NA	NA	NA	NA
FBgn0003249	Rh3	3R	20081060	20082450	-	1391	0	0	0	0	NA	NA	NA	NA	0	0	NA	NA	NA	NA
FBgn0003250	Rh4	3L	16852527	16862517	-	1349	5.24272	3.88637	1.15436	0.855716	-2.24461	1.26695	0.0764517	0.135409	0	0	-4.81834	1.575	0.00221878	0.00634888
FBgn0003254	rib	2R	19270078	19281396	+	4665	1.56727	0.335963	2.52322	0.540882	0.643889	1.16916	0.581819	0.688602	4.26081	0.913356	1.44184	1.14031	0.206079	0.321302
FBgn0003255	rk	2L	13982743	14001248	-	5386	13.586	2.52247	5.29527	0.983154	-1.36999	0.569529	0.0161513	0.0348062	9.83529	1.82608	-0.491374	0.538356	0.361384	0.496304
FBgn0003256	rl	2R	1071462	1125927	+	7591	598.587	78.8549	580.829	76.5155	-0.0431399	0.0876914	0.622754	0.722865	565.332	74.4739	-0.0815743	0.0891306	0.360075	0.495122
FBgn0003257	r-l	3R	21070557	21073319	-	2039	136.824	67.1032	314.002	153.998	1.19597	0.132328	1.59697e-19	1.85486e-18	288.704	141.591	1.06962	0.134624	1.93816e-15	2.24357e-14
FBgn0003261	Rm62	3R	6000426	6008579	-	5386	12986.4	2411.15	11940.4	2216.92	-0.121505	0.0551527	0.0275899	0.0559784	12043.9	2236.14	-0.108969	0.0552426	0.0485466	0.0979014
FBgn0003267	ro	3R	26876771	26881171	-	1241	0	0	0	0	NA	NA	NA	NA	0	0	NA	NA	NA	NA
FBgn0003268	rod	3R	31580951	31588244	+	6479	629.056	97.0916	1106.85	170.836	0.812678	0.0788186	6.30182e-25	1.01178e-23	1130.1	174.426	0.841707	0.079467	3.2488e-26	7.46923e-25
FBgn0003270	amos	2L	18596136	18596921	-	786	0	0	0.222156	0.282641	0.398902	4.08046	0.922124	NA	0	0	0	4.08052	1	NA
FBgn0003274	RpLP2	2R	16586129	16586732	+	604	4575.2	7574.83	4847.46	8025.6	0.0836184	0.107054	0.43475	0.55687	6110.46	10116.7	0.417769	0.107034	9.49522e-05	0.000350582
FBgn0003275	RpII18	3R	5371795	5372397	+	541	988.12	1826.47	1913.32	3536.64	0.956938	0.071475	7.06611e-41	2.19611e-39	1719.22	3177.86	0.801753	0.0722232	1.2397e-28	3.22322e-27
FBgn0003277	RpII215	X	11562800	11570326	-	6736	1601.1	237.694	1689.44	250.808	0.0750369	0.0826125	0.36372	0.485855	2127.93	315.904	0.409334	0.0825453	7.08912e-07	3.53282e-06
FBgn0003278	RpI135	2L	404285	407969	+	3564	344.159	96.5652	412.585	115.764	0.265046	0.108822	0.0148677	0.0322588	366.457	102.822	0.0873401	0.111236	0.432351	0.568079
FBgn0003279	RpL4	3R	27922821	27924888	+	1400	29114.6	20796.1	36411.4	26008.1	0.322579	0.066882	1.41342e-06	5.85114e-06	35182.2	25130.2	0.272995	0.0669125	4.50575e-05	0.000175632
FBgn0003285	rst	X	2950399	2973834	-	6251	140.622	22.4959	296.422	47.42	1.08258	0.117931	4.32044e-20	5.22721e-19	1031.89	165.076	2.87917	0.112588	3.07199e-144	1.60584e-141
FBgn0003292	rt	3L	11584122	11587770	-	3268	2.88929	0.884115	0.799336	0.244595	-1.90133	1.57131	0.226268	0.334191	0.619173	0.189465	-2.19736	1.68377	0.191884	0.303786
FBgn0003295	ru	3L	1370628	1387437	+	1798	0.365555	0.203312	0	0	-1.52465	3.72015	0.681928	NA	0.309586	0.172184	-0.257722	3.7202	0.94477	NA
FBgn0003300	run	X	20690670	20697321	+	3145	0	0	1.64226	0.52218	2.84265	2.3677	0.229909	0.338143	0.309586	0.0984376	0.704071	2.57544	0.784562	0.856105
FBgn0003301	rut	X	14787478	14826073	-	9618	20.3179	2.11249	8.79639	0.914576	-1.18168	0.451071	0.00879996	0.020057	21.5073	2.23615	0.0812357	0.415939	0.845153	0.898535
FBgn0003302	rux	X	6035753	6037800	-	1463	46.1468	31.5426	65.7888	44.9684	0.496611	0.235586	0.0350327	0.0689276	62.9306	43.0148	0.444614	0.240611	0.064624	0.125299
FBgn0003308	ry	3R	13032528	13038020	+	4337	68.7888	15.8609	8.86666	2.04442	-2.93146	0.356673	2.05385e-16	1.93809e-15	22.1207	5.10046	-1.63525	0.310647	1.40934e-07	7.72068e-07
FBgn0003310	S	2L	1049674	1077815	-	5206	1329.09	255.299	1748.59	335.879	0.39258	0.0781444	5.06658e-07	2.22138e-06	1333.3	256.109	0.00283973	0.0793906	0.971466	0.981347
FBgn0003312	sad	3R	11877235	11879754	+	1773	0.365555	0.206179	0.222156	0.125299	-0.562882	3.10354	0.856079	NA	0.32456	0.183057	-0.257722	3.10357	0.933819	NA
FBgn0003313	sala	2L	11484707	11486949	+	1697	0	0	0	0	NA	NA	NA	NA	0	0	NA	NA	NA	NA
FBgn0003317	sax	2R	7806484	7810067	+	2865	449.77	156.988	554.67	193.602	0.302224	0.0947457	0.00142352	0.00378031	468.214	163.426	0.0548074	0.0971762	0.572754	0.692296
FBgn0003319	Sb	3R	16116161	16145284	+	4180	0	0	0.222156	0.0531472	0.398902	4.08046	0.922124	NA	0	0	0	4.08052	1	NA
FBgn0003321	sbr	X	10832752	10847092	-	3545	668.232	188.5	722.228	203.731	0.108496	0.0847887	0.200686	0.304277	751.839	212.084	0.167307	0.0856053	0.0506535	0.101593
FBgn0003326	sca	2R	12780541	12802010	+	3796	8.27101	2.17888	4.55392	1.19966	-0.802853	0.734551	0.274401	0.391073	3.84061	1.01175	-1.04795	0.771713	0.174478	0.282004
FBgn0003330	Sce	3R	27680431	27682029	-	1542	174.239	112.996	209.883	136.111	0.265967	0.150254	0.0767086	0.13577	190.676	123.655	0.13659	0.153324	0.373007	0.507702
FBgn0003334	Scm	3R	9633359	9637611	-	4069	719.382	176.796	1031.91	253.603	0.51319	0.0989779	2.16141e-07	9.94407e-07	1043.77	256.516	0.533112	0.0995486	8.54149e-08	4.79018e-07
FBgn0003339	Scr	3R	6823120	6849981	-	4577	0	0	0	0	0	4.08046	1	NA	0.37527	0.0819904	0.704067	4.08052	0.86301	NA
FBgn0003345	sd	X	15804370	15827682	+	8766	13077.5	1491.84	8507.97	970.565	-0.620615	0.0854041	3.68086e-13	2.77718e-12	8939.47	1019.79	-0.549045	0.0854663	1.32643e-10	1.01106e-09
FBgn0003346	RanGAP	2L	19441959	19447317	+	2401	1392.63	580.02	3068.54	1278.03	1.13886	0.070696	2.19556e-58	1.19965e-56	2650.83	1104.05	0.929044	0.0712361	7.08167e-39	2.9803e-37
FBgn0003353	sei	2R	24047411	24053035	+	3278	192.102	58.6036	152.8	46.6139	-0.318296	0.159369	0.0458013	0.086989	135.784	41.4229	-0.495757	0.163806	0.00247411	0.0070068
FBgn0003356	Jon99Cii	3R	29923754	29924615	-	862	0	0	0	0	NA	NA	NA	NA	0	0	NA	NA	NA	NA
FBgn0003357	Jon99Ciii	3R	29922216	29923455	+	1240	0	0	0	0	NA	NA	NA	NA	0	0	NA	NA	NA	NA
FBgn0003358	Jon99Ci	3R	29925226	29926189	-	907	0.365555	0.403038	0	0	-1.52465	3.59523	0.671511	NA	0.37527	0.413748	-0.257722	3.59527	0.942854	NA
FBgn0003360	sesB	X	10780893	10786958	-	2006	12021.2	5992.64	11159	5562.8	-0.107859	0.0878939	0.219764	0.326499	11589	5777.18	-0.0528129	0.0879439	0.548153	0.670806
FBgn0003366	sev	X	11071441	11086299	-	8171	4.8631	0.595166	1.0841	0.132676	-2.16808	1.16552	0.0628598	0.11457	1.02439	0.125369	-2.25649	1.23493	0.067667	0.130467
FBgn0003371	sgg	X	2633952	2679553	+	12445	6678.62	536.651	4913.7	394.833	-0.44394	0.0817112	5.54041e-08	2.70059e-07	4789.73	384.872	-0.480237	0.0818886	4.50429e-09	2.93547e-08
FBgn0003372	Sgs1	2L	4937409	4941423	+	3950	0.491696	0.12448	0.222156	0.0562419	-0.562883	2.27357	0.804462	0.866534	1.88747	0.477839	2.15246	2.03632	0.290494	0.420398
FBgn0003373	Sgs3	3L	11512221	11513402	+	1109	0.731111	0.659252	0	0	-2.31987	3.10585	0.455102	NA	0.37527	0.338386	-1.05294	3.10588	0.734599	NA
FBgn0003374	Sgs4	X	3250089	3251040	+	952	0	0	0	0	NA	NA	NA	NA	0	0	NA	NA	NA	NA
FBgn0003375	Sgs5	3R	17595362	17596112	+	636	0	0	0	0	NA	NA	NA	NA	0	0	NA	NA	NA	NA
FBgn0003377	Sgs7	3L	11509861	11510247	+	321	0	0	0	0	NA	NA	NA	NA	0	0	NA	NA	NA	NA
FBgn0003378	Sgs8	3L	11508967	11509394	-	359	0	0	0	0	NA	NA	NA	NA	0	0	NA	NA	NA	NA
FBgn0003380	Sh	X	17924307	18063247	-	22552	18.2378	0.808701	23.4754	1.04095	0.348414	0.389975	0.371629	0.493063	18.1695	0.805671	-0.0112508	0.407677	0.977983	0.985125
FBgn0003382	sha	2R	11324314	11336463	+	6115	2.066	0.337857	1.27495	0.208495	-0.642342	1.38883	0.643719	0.740474	0.69983	0.114445	-1.5784	1.58743	0.320071	0.453617
FBgn0003386	Shaw	2L	3718185	3729145	+	5000	12.3761	2.47522	141.833	28.3666	3.52626	0.320549	3.79095e-28	7.21488e-27	73.3333	14.6667	2.57525	0.329	4.97627e-15	5.4977e-14
FBgn0003388	shd	3L	14614458	14622205	+	3016	0	0	1.01383	0.336151	2.21315	2.88907	0.44365	NA	0.32456	0.107613	0.70407	3.02921	0.816206	NA
FBgn0003390	shf	X	6771463	6779659	-	1796	17.9434	9.99073	3.05681	1.70201	-2.51826	0.634909	7.29859e-05	0.000238737	5.54986	3.09012	-1.68199	0.590794	0.00441344	0.0117898
FBgn0003391	shg	2R	21049654	21057197	-	6400	409.033	63.9113	467.957	73.1183	0.18822	0.0978656	0.0544481	0.101298	487.053	76.102	0.246154	0.0989693	0.0128762	0.0306095
FBgn0003392	shi	X	15892116	15906716	+	5989	3097.59	517.213	2286.42	381.77	-0.438657	0.0577185	2.96249e-14	2.4359e-13	2226.9	371.832	-0.476377	0.0582666	2.93871e-16	3.62125e-15
FBgn0003396	shn	2R	11159086	11217394	+	10997	2424.2	220.442	2504.31	227.727	0.0448632	0.0908736	0.621527	0.72206	2939.22	267.275	0.276841	0.09092	0.00232769	0.00662995
FBgn0003401	shu	2R	23841461	23843286	-	1694	679.128	400.902	1128.54	666.199	0.730449	0.0781808	9.35677e-21	1.17981e-19	768.076	453.41	0.177606	0.0807114	0.0277708	0.0602622
FBgn0003410	sina	3L	16853751	16858712	+	3257	949.205	291.435	835.879	256.641	-0.184551	0.0836624	0.0273912	0.055642	891.958	273.859	-0.0869906	0.084248	0.301813	0.433556
FBgn0003411	sisA	X	11321579	11322357	-	779	0.365555	0.469262	0	0	-1.52464	4.08046	0.708668	NA	0	0	-1.21951	4.08052	0.765046	NA
FBgn0003415	skd	3L	20992814	21027434	-	12307	2312.12	187.871	3366.79	273.567	0.539981	0.0847569	1.87877e-10	1.13385e-09	3162.95	257.004	0.451111	0.0850534	1.13384e-07	6.27371e-07
FBgn0003416	sl	X	16350315	16356482	+	5678	340.843	60.0286	312.734	55.0782	-0.129749	0.125227	0.300153	0.418038	323.629	56.997	-0.0809212	0.126563	0.52258	0.648945
FBgn0003423	slgA	X	21374002	21385159	+	4305	1638.06	380.502	1452.83	337.475	-0.172971	0.0787006	0.027961	0.0566975	1527.94	354.922	-0.10035	0.079102	0.204579	0.319527
FBgn0003429	slo	3R	24662491	24711595	+	10153	1.34192	0.132169	0	0	-3.11681	2.38828	0.191879	0.293685	0.619173	0.0609842	-1.02675	2.32634	0.658954	0.762585
FBgn0003430	slp1	2L	3825675	3827099	+	1425	1.20874	0.848242	0.222156	0.155899	-2.04355	2.32963	0.380379	0.502116	0.309586	0.217254	-1.73838	2.32964	0.455545	NA
FBgn0003435	sm	2R	19517864	19631508	-	16635	189.07	11.3658	209.44	12.5903	0.139385	0.14621	0.340425	0.461175	204.719	12.3065	0.108806	0.14855	0.463891	0.597583
FBgn0003444	smo	2L	277582	282167	+	4008	465.643	116.178	436.965	109.023	-0.0931735	0.0983936	0.343666	0.464514	385.072	96.0758	-0.269882	0.100926	0.00749416	0.0189443
FBgn0003447	sn	X	7964024	7986601	+	3507	447.338	127.556	562	160.251	0.323559	0.100646	0.00130532	0.00349012	389.643	111.104	-0.20019	0.104418	0.0552114	0.109409
FBgn0003448	sna	2L	15476593	15478260	-	1668	0.365555	0.219158	0.222156	0.133187	-0.56288	3.91808	0.885767	NA	0	0	-1.21951	3.91814	0.755613	NA
FBgn0003449	snf	X	5309242	5310501	+	835	364.393	436.399	504.011	603.606	0.472699	0.104019	5.51102e-06	2.10558e-05	568.983	681.417	0.646106	0.104488	6.26792e-10	4.45939e-09
FBgn0003450	snk	3R	13040165	13042770	-	1435	0	0	0	0	NA	NA	NA	NA	0	0	NA	NA	NA	NA
FBgn0003459	stwl	3L	14402930	14409939	-	4334	700.684	161.671	628.262	144.961	-0.162855	0.0872774	0.0620487	0.113275	690.561	159.336	-0.0234917	0.0878624	0.789185	0.859267
FBgn0003460	so	2R	7419350	7434872	+	2786	1.20874	0.433864	4.9022	1.75959	1.98424	1.06482	0.0623993	0.113833	11.9758	4.29858	3.329	1.03548	0.00130469	0.00391604
FBgn0003462	Sod1	3L	11112281	11113740	-	735	1708.94	2325.09	1846.81	2512.66	0.112494	0.0945778	0.234269	0.3432	1879.49	2557.13	0.139931	0.0948986	0.14034	0.238119
FBgn0003463	sog	X	15603283	15633434	-	6442	122.918	19.0808	77.8161	12.0795	-0.677315	0.201098	0.000756909	0.00211042	79.7434	12.3787	-0.634577	0.204608	0.00192585	0.0055798
FBgn0003464	sol	X	21350280	21357912	+	5724	792.508	138.454	831.388	145.246	0.0618572	0.0969944	0.523643	0.638104	827.575	144.58	0.0602441	0.097785	0.537837	0.662425
FBgn0003475	spir	2L	20311219	20348386	+	6505	2474.63	380.419	110.002	16.9104	-4.49932	0.234593	5.51705e-82	4.87563e-80	260.542	40.0526	-3.24625	0.229105	1.41948e-45	7.70399e-44
FBgn0003479	spn-A	3R	30054696	30056037	-	1342	126.327	94.1331	169.636	126.406	0.429965	0.159052	0.00686564	0.016044	163.065	121.509	0.373523	0.161939	0.021079	0.0474839
FBgn0003480	spn-B	3R	14328051	14329608	+	1384	13.8582	10.0131	29.3973	21.2408	1.11293	0.393775	0.0047088	0.0113725	23.8246	17.2143	0.794611	0.406594	0.0506644	0.101595
FBgn0003482	spn-D	3R	27165716	27167122	+	1026	35.1243	34.2342	28.8704	28.1388	-0.260437	0.311747	0.403487	0.525722	24.3385	23.7218	-0.515161	0.326097	0.114158	0.201386
FBgn0003483	spn-E	3R	15837419	15844415	+	4678	687.191	146.899	671.774	143.603	-0.030211	0.10144	0.765838	0.837715	677.912	144.915	-0.0207887	0.102333	0.83902	0.89469
FBgn0003486	spo	3L	5590083	5592571	-	2489	0.358524	0.144043	0	0	-1.52464	4.08046	0.708668	NA	0	0	-1.21951	4.08052	0.765046	NA
FBgn0003495	spz	3R	27064990	27070070	-	2364	1061.52	449.036	370.656	156.792	-1.52296	0.0917361	6.79204e-62	4.01323e-60	503.408	212.947	-1.07787	0.0909211	2.02614e-32	6.38847e-31
FBgn0003499	sr	3R	18090803	18135583	+	8113	15.659	1.93012	10.1729	1.2539	-0.618768	0.490613	0.207232	0.311415	9.99853	1.23241	-0.654754	0.505265	0.195023	0.307561
FBgn0003502	Btk29A	2L	8258373	8301079	-	9022	812.491	90.0566	1758.06	194.863	1.10992	0.09093	2.87469e-34	7.09114e-33	1384.78	153.489	0.767509	0.0919042	6.75821e-17	8.73991e-16
FBgn0003507	srp	3R	15986152	16004085	+	5668	4903.65	865.147	6898.37	1217.07	0.491215	0.0712472	5.40506e-12	3.68669e-11	6011.57	1060.61	0.293128	0.0714785	4.11517e-05	0.000161421
FBgn0003510	Sry-alpha	3R	30039719	30043071	+	3300	0	0	0	0	NA	NA	NA	NA	0	0	NA	NA	NA	NA
FBgn0003511	Sry-beta	3R	30039719	30043071	+	3300	0	0	0	0	NA	NA	NA	NA	0	0	NA	NA	NA	NA
FBgn0003512	Sry-delta	3R	30043341	30044886	+	1546	137.606	89.0076	184.973	119.646	0.418137	0.152827	0.00621863	0.0146568	160.17	103.603	0.213681	0.15694	0.173341	0.280714
FBgn0003513	ss	3R	16374434	16403690	-	5191	3.15563	0.607904	2.49191	0.480045	-0.376723	0.953704	0.692835	0.78115	4.29654	0.827691	0.447343	0.9165	0.62548	0.737361
FBgn0003514	sqh	X	6223061	6225140	-	1578	1754.9	1112.1	1618.98	1025.97	-0.116562	0.067257	0.0830813	0.145604	1800.7	1141.13	0.0365261	0.0675165	0.588511	0.705272
FBgn0003515	st	3L	16497651	16500460	+	2146	0	0	0	0	0	3.30935	1	NA	0.943733	0.439764	2.10685	3.20914	0.511494	NA
FBgn0003517	sta	X	1481797	1483413	-	1338	3091.53	2310.56	3771.58	2818.82	0.286422	0.070047	4.33239e-05	0.000146425	4126.12	3083.79	0.416113	0.0701701	3.02819e-09	2.00774e-08
FBgn0003520	stau	2R	18117896	18125779	-	5369	1803.93	335.99	1043.99	194.447	-0.791909	0.0808918	1.24633e-22	1.7471e-21	1068.67	199.044	-0.757801	0.081545	1.49936e-20	2.49442e-19
FBgn0003525	stg	3R	29251826	29255800	-	3064	2791.5	911.063	4733.63	1544.92	0.760176	0.0769159	4.92275e-23	7.10652e-22	3657.93	1193.84	0.388377	0.0773686	5.17202e-07	2.63158e-06
FBgn0003527	stil	2R	12570367	12571883	+	1171	0.358524	0.306169	0.222156	0.189714	-0.562882	2.53258	0.824114	0.879684	0.994443	0.849225	1.20924	2.39333	0.613379	NA
FBgn0003545	sub	2R	17745500	17748078	-	2460	201.06	81.7316	360.028	146.353	0.835966	0.119411	2.54602e-12	1.7944e-11	306.39	124.549	0.601482	0.122309	8.75618e-07	4.29676e-06
FBgn0003557	Su(dx)	2L	2037714	2044372	+	4798	2318.55	483.233	1183.52	246.669	-0.972657	0.0688124	2.31455e-45	8.71212e-44	1039.91	216.739	-1.15756	0.0701706	3.89695e-61	3.75772e-59
FBgn0003559	su(f)	X	23096771	23101431	+	3014	601.191	199.466	577.874	191.73	-0.0577002	0.0910496	0.526262	0.639838	619.555	205.559	0.0401295	0.0918321	0.662121	0.764672
FBgn0003567	su(Hw)	3R	14304455	14308589	-	3682	1089.51	295.903	1928.9	523.874	0.821754	0.0811075	3.99792e-24	6.14688e-23	1452	394.352	0.411634	0.0822361	5.57116e-07	2.82166e-06
FBgn0003575	su(sable)	X	635890	643760	+	5047	768.058	152.181	717.832	142.229	-0.10049	0.0920115	0.27477	0.391434	739.117	146.447	-0.0576519	0.0928192	0.53452	0.659649
FBgn0003598	Su(var)3-7	3R	13264364	13270038	+	5051	655.776	129.831	925.117	183.155	0.491157	0.0868126	1.53444e-08	7.87202e-08	937.405	185.588	0.510659	0.0875444	5.4395e-09	3.52144e-08
FBgn0003607	Su(var)205	2L	8209626	8211122	-	1109	3756.24	3387.06	6404.65	5775.16	0.769908	0.0652439	3.88177e-32	8.8059e-31	5294.43	4774.05	0.494967	0.0655682	4.39003e-14	4.55133e-13
FBgn0003612	Su(var)2-10	2R	9116122	9122000	+	5039	862.846	171.234	1250.31	248.127	0.532664	0.0752241	1.4309e-12	1.03228e-11	1138.05	225.849	0.399196	0.0762547	1.64947e-07	8.95219e-07
FBgn0003638	su(w[a])	X	1012779	1046040	+	5658	1694.22	299.439	1695.84	299.724	0.000191317	0.0843248	0.99819	1	1470.37	259.874	-0.205874	0.0851361	0.0155988	0.0363082
FBgn0003651	svp	3R	12258737	12302785	+	5595	0.358524	0.0640794	0.355025	0.063454	-0.562882	3.64773	0.877365	NA	0	0	-1.21951	3.64778	0.738141	NA
FBgn0003654	sw	X	20227961	20236382	-	3304	480.068	145.299	485.316	146.887	0.0173337	0.0925406	0.851419	0.900132	478.898	144.945	0.00053069	0.0940612	0.995498	0.997105
FBgn0003655	swa	X	6363418	6365708	-	2022	43.1302	21.3305	29.9812	14.8275	-0.504721	0.286008	0.0776125	0.137178	34.6766	17.1496	-0.308707	0.288522	0.284636	0.413666
FBgn0003656	sws	X	7956820	7968236	-	5963	1721.02	288.616	1191.5	199.815	-0.533564	0.069545	1.6906e-14	1.41296e-13	1361.09	228.256	-0.338985	0.0697834	1.18772e-06	5.74316e-06
FBgn0003660	Syb	2R	10249435	10252417	-	1237	16102.4	13017.3	18202	14714.6	0.176893	0.0822479	0.0314976	0.0628159	15860	12821.3	-0.0218199	0.0823239	0.790972	0.860637
FBgn0003676	CCT1	3R	22489105	22491439	-	1980	1811.76	915.031	1972.96	996.446	0.124816	0.081887	0.127446	0.208627	1998.19	1009.19	0.142791	0.0822482	0.0825457	0.153759
FBgn0003683	term	3L	18592303	18593771	-	1469	0	0	0	0	NA	NA	NA	NA	0	0	NA	NA	NA	NA
FBgn0003687	Tbp	2R	21686192	21687642	-	1387	328.236	236.652	472.909	340.958	0.528934	0.10161	1.93458e-07	8.94096e-07	461.463	332.706	0.497167	0.103105	1.42169e-06	6.81149e-06
FBgn0003701	thr	2R	17861273	17865963	-	4578	324.478	70.8776	345.891	75.555	0.092553	0.106474	0.384706	0.506446	292.064	63.7972	-0.15423	0.109941	0.160663	0.264671
FBgn0003710	tipE	3L	4188499	4193788	+	4084	12.1519	2.97549	1.15436	0.282655	-3.49209	0.977367	0.000352967	0.00103676	1.59285	0.390023	-2.88736	0.928335	0.00186923	0.00542719
FBgn0003714	tko	X	2442313	2443976	-	1596	97.2909	60.9592	150.712	94.4313	0.642903	0.169763	0.000152437	0.000473622	148.815	93.2428	0.623713	0.172463	0.0002986	0.00101012
FBgn0003716	tkv	2L	5219000	5271384	-	4433	196.217	44.2628	392.609	88.5652	1.00011	0.136945	2.81402e-13	2.15191e-12	309.703	69.8632	0.663277	0.13982	2.0974e-06	9.86801e-06
FBgn0003719	tld	3R	24749731	24753510	+	3359	3.02246	0.899809	0.355025	0.105694	-3.39475	1.7555	0.0531395	0.0991657	0.37527	0.111721	-3.08959	1.7555	0.0784169	0.147498
FBgn0003720	tll	3R	30852315	30854400	+	1965	0	0	0	0	NA	NA	NA	NA	0	0	NA	NA	NA	NA
FBgn0003721	Tm1	3R	15278220	15308779	+	9463	7003.52	740.095	6555.79	692.782	-0.0958715	0.0550573	0.0816302	0.143407	5918.04	625.387	-0.243493	0.0553343	1.08056e-05	4.62592e-05
FBgn0003731	Egfr	2R	21522420	21559977	+	6947	393.33	56.6187	588.325	84.6876	0.576231	0.0942157	9.59064e-10	5.44523e-09	890.652	128.207	1.17794	0.0932199	1.335e-36	5.15924e-35
FBgn0003733	tor	2R	7705183	7709184	-	3131	10.5835	3.38022	0	0	-6.12813	1.31245	3.02334e-06	1.19977e-05	9.79569	3.12861	-0.0842599	0.636919	0.894753	0.93103
FBgn0003741	tra	3L	16590059	16591050	-	862	277.582	322.021	243.69	282.703	-0.172377	0.137572	0.210208	0.314909	220.57	255.882	-0.325218	0.140601	0.0207198	0.0468021
FBgn0003742	tra2	2R	14602004	14604337	-	1844	134.463	72.9194	214.88	116.529	0.664396	0.144716	4.4104e-06	1.71604e-05	202.788	109.972	0.582103	0.14744	7.87866e-05	0.000295509
FBgn0003744	trc	3L	19830864	19834304	-	2816	1163.87	413.305	1214.93	431.438	0.0598671	0.0749612	0.424498	0.546236	1150.82	408.672	-0.0176602	0.0758662	0.815931	0.879703
FBgn0003747	Gr5a	X	5680617	5682488	+	1490	1.58836	1.06601	0.475613	0.319203	-1.6417	1.96813	0.404199	0.526331	0.37527	0.251859	-2.14025	2.04161	0.294493	0.425131
FBgn0003748	Treh	2R	21074018	21088945	+	4369	520.883	119.222	354.544	81.1499	-0.559724	0.101215	3.20188e-08	1.59045e-07	294.638	67.4383	-0.825252	0.104923	3.68198e-15	4.13214e-14
FBgn0003751	trk	2L	10271443	10272324	-	882	38.6686	43.8419	5.09306	5.77444	-2.9866	0.525103	1.28805e-08	6.64826e-08	14.5805	16.5312	-1.40448	0.456551	0.00209599	0.00602528
FBgn0003861	trp	3R	29914521	29920289	-	4149	0	0	0	0	NA	NA	NA	NA	0	0	NA	NA	NA	NA
FBgn0003862	trx	3R	14263358	14286903	-	14052	2090.5	148.769	2607.86	185.586	0.317265	0.0811851	9.30916e-05	0.000299017	2445.82	174.055	0.225292	0.0815889	0.00575702	0.0149526
FBgn0003863	alphaTry	2R	11344260	11345119	-	860	0	0	0	0	NA	NA	NA	NA	0	0	NA	NA	NA	NA
FBgn0003865	tsg	X	11988062	11988948	-	887	0	0	0	0	NA	NA	NA	NA	0	0	NA	NA	NA	NA
FBgn0003866	tsh	2L	21828593	21837011	+	4732	3071.55	649.102	23.8254	5.03496	-6.97944	0.329708	1.86366e-99	2.12813e-97	340.329	71.9208	-3.17364	0.295688	7.11864e-27	1.67939e-25
FBgn0003867	tsl	3R	21778114	21782536	-	2059	1.45519	0.706746	0.71005	0.344852	-1.25024	1.99577	0.531023	0.644417	0.75054	0.364517	-1.07123	2.01562	0.595097	0.710978
FBgn0003870	ttk	3R	31713867	31735392	+	7557	4471.14	591.656	4037.91	534.327	-0.148649	0.0784873	0.0582356	0.107297	4076.75	539.467	-0.133965	0.078673	0.088603	0.163327
FBgn0003882	tub	3R	4387742	4389813	+	2006	380.816	189.838	369.79	184.342	-0.0490867	0.107802	0.648864	0.7447	262.57	130.893	-0.539984	0.112853	1.71132e-06	8.14027e-06
FBgn0003884	alphaTub84B	3R	7086599	7088839	+	1752	7811.8	4458.79	8819.94	5034.21	0.17517	0.0714179	0.0141768	0.0309381	6724.93	3838.43	-0.216297	0.0716894	0.0025517	0.00719373
FBgn0003885	alphaTub84D	3R	7530753	7532732	+	1980	907.103	458.133	1811.25	914.773	0.997033	0.0717679	7.03738e-44	2.49202e-42	1194.01	603.033	0.397798	0.0736158	6.52796e-08	3.72619e-07
FBgn0003886	alphaTub85E	3R	9731221	9733250	-	1560	3.02949	1.94198	0.222156	0.142407	-3.39897	1.70969	0.0468045	0.0886955	0.684856	0.43901	-2.19036	1.60309	0.171833	0.278726
FBgn0003888	betaTub60D	2R	24305881	24313099	+	2518	8704.44	3456.89	5449.37	2164.16	-0.676594	0.0657934	8.35294e-25	1.33476e-23	7739.38	3073.62	-0.170189	0.0656785	0.00956297	0.0235389
FBgn0003889	betaTub85D	3R	9408383	9410282	-	1841	1.34895	0.732725	0.506915	0.275348	-1.32367	2.36796	0.576166	0.683636	0	0	-2.81991	2.43201	0.246254	0.369288
FBgn0003890	betaTub97EF	3R	27967008	27988384	-	1869	154.106	82.4539	20.6361	11.0413	-2.91756	0.246214	2.16012e-32	4.94444e-31	43.5585	23.3058	-1.81504	0.221388	2.43415e-16	3.022e-15
FBgn0003891	tud	2R	21183322	21192913	+	8830	16838.5	1906.97	16352.1	1851.88	-0.0425822	0.0753292	0.571882	0.680333	16373.3	1854.28	-0.0406106	0.0753792	0.590059	0.70625
FBgn0003892	ptc	2R	8649649	8665223	+	5521	5.11538	0.926532	44.5693	8.07269	3.21981	0.466628	5.19436e-12	3.54773e-11	135.388	24.5223	4.82001	0.458502	7.56505e-26	1.70764e-24
FBgn0003896	tup	2L	18859507	18881261	-	3314	3432.44	1035.74	4691.54	1415.67	0.450872	0.0684824	4.5866e-11	2.89886e-10	3373.13	1017.84	-0.0243244	0.069099	0.724821	0.810652
FBgn0003900	twi	2R	22985374	23048325	+	2388	2.93028	1.22708	1.0841	0.453976	-1.41289	1.26039	0.262289	0.376609	1.69427	0.709494	-0.766765	1.21638	0.528454	0.654031
FBgn0003916	snRNA:U1:21D	2L	901491	901654	-	164	0	0	0	0	NA	NA	NA	NA	0	0	NA	NA	NA	NA
FBgn0003920	snRNA:U2:14B	X	16254672	16254863	+	192	0	0	0	0	NA	NA	NA	NA	0	0	NA	NA	NA	NA
FBgn0003922	snRNA:U2:38ABa	2L	19815614	19815805	-	192	0	0	0	0	NA	NA	NA	NA	0	0	NA	NA	NA	NA
FBgn0003923	snRNA:U2:38ABb	2L	19812646	19812836	+	191	0	0	0	0	NA	NA	NA	NA	0	0	NA	NA	NA	NA
FBgn0003926	snRNA:U3	2L	1432711	1432921	+	211	0	0	0	0	NA	NA	NA	NA	0	0	NA	NA	NA	NA
FBgn0003930	snRNA:U4:39B	2L	21215036	21215178	-	143	3.04939	21.3244	1.02149	7.1433	-1.51003	1.44516	0.296076	0.413839	0.64912	4.5393	-2.15992	1.61164	0.180181	0.289245
FBgn0003931	snRNA:U4:38AB	2L	19810734	19810875	+	142	0.365555	2.57433	0.253458	1.78491	-0.562881	3.84239	0.883533	NA	0	0	-1.21951	3.84245	0.750956	NA
FBgn0003933	snRNA:U5:14B	X	16254008	16254117	-	110	0	0	0	0	NA	NA	NA	NA	0	0	NA	NA	NA	NA
FBgn0003934	snRNA:U5:23D	2L	3048701	3048831	+	131	0	0	0	0	0	4.08046	1	NA	0.309586	2.36326	0.704067	4.08052	0.86301	NA
FBgn0003935	snRNA:U5:34A	2L	13244848	13244974	+	127	0	0	0	0	NA	NA	NA	NA	0	0	NA	NA	NA	NA
FBgn0003936	snRNA:U5:35D	2L	15751557	15751682	-	126	0	0	0	0	NA	NA	NA	NA	0	0	NA	NA	NA	NA
FBgn0003938	snRNA:U5:63BC	3L	3090801	3090923	+	123	0	0	0	0	0	3.70715	1	NA	0.684856	5.56794	1.62416	3.65808	0.657048	NA
FBgn0003941	RpL40	2L	4227699	4228561	+	659	8536.26	12953.4	10445.4	15850.3	0.29189	0.0681384	1.83744e-05	6.54534e-05	12015.2	18232.4	0.493808	0.0681616	4.33509e-13	4.14002e-12
FBgn0003942	RpS27A	2L	10408352	10410456	+	592	4854.08	8199.45	7555.57	12762.8	0.638796	0.0653635	1.47064e-22	2.05586e-21	8400.52	14190.1	0.791553	0.0654186	1.0585e-33	3.58805e-32
FBgn0003943	Ubi-p63E	3L	3899259	3903184	-	3138	2372.84	756.164	1864.93	594.306	-0.350101	0.0862582	4.93334e-05	0.000165361	1981.95	631.596	-0.259617	0.0865163	0.00269277	0.00756137
FBgn0003944	Ubx	3R	16656623	16734426	-	4282	0.491696	0.114829	0	0	-1.52464	4.08046	0.708668	NA	0	0	-1.21951	4.08052	0.765046	NA
FBgn0003950	unc	X	21111414	21116914	-	4775	98.9789	20.7286	161.421	33.8055	0.715056	0.165578	1.57064e-05	5.64043e-05	163.049	34.1463	0.727774	0.167876	1.45642e-05	6.08292e-05
FBgn0003961	Uro	2L	7780085	7781415	+	1262	2.43155	1.92674	2.34002	1.85422	-0.093117	1.24398	0.940331	0.961312	0.32456	0.257179	-2.74072	1.63814	0.0943135	0.172002
FBgn0003963	ush	2L	476220	540560	+	6706	1405.63	209.608	2119.82	316.108	0.589943	0.0675848	2.571e-18	2.76206e-17	2395.77	357.257	0.767174	0.0677436	9.90491e-30	2.73266e-28
FBgn0003964	usp	X	2038798	2042311	-	3038	1167	384.134	1023.39	336.863	-0.19116	0.0721587	0.0080692	0.0185705	933.238	307.188	-0.323074	0.0734672	1.09488e-05	4.67913e-05
FBgn0003965	v	X	10923972	10925631	+	1305	0.983392	0.753557	0	0	-2.66925	3.52149	0.448457	NA	0	0	-2.36412	3.52154	0.502009	NA
FBgn0003969	vap	X	15999951	16005812	-	4457	2309.28	518.123	1474.09	330.737	-0.645939	0.0737996	2.08469e-18	2.24912e-17	1434.82	321.926	-0.686827	0.0744697	2.89158e-20	4.73914e-19
FBgn0003975	vg	2R	12884632	12899385	+	3463	0.717048	0.20706	0	0	-2.32841	2.31335	0.314171	0.433114	1.33398	0.385208	0.82772	2.11841	0.695999	0.788863
FBgn0003977	vir	2R	23360192	23366355	-	5867	405.296	69.0806	539.77	92.001	0.413684	0.0914692	6.1069e-06	2.31584e-05	554.695	94.5448	0.453985	0.0925774	9.39777e-07	4.5957e-06
FBgn0003978	vls	2L	20064261	20065679	-	1310	82.4517	62.9403	90.6208	69.1762	0.129869	0.194259	0.503792	0.621364	77.0286	58.8005	-0.0910144	0.201169	0.650961	0.756977
FBgn0003979	Vm26Aa	2L	5959596	5960340	-	745	0.491696	0.659995	0	0	-1.52464	4.08046	0.708668	NA	0	0	-1.21951	4.08052	0.765046	NA
FBgn0003980	Vm26Ab	2L	5957004	5957639	+	636	0	0	0	0	NA	NA	NA	NA	0	0	NA	NA	NA	NA
FBgn0003983	Vm34Ca	2L	13411141	13411631	-	491	0	0	0	0	NA	NA	NA	NA	0	0	NA	NA	NA	NA
FBgn0003984	vn	3L	5813338	5845664	-	5239	59.4805	11.3534	115.701	22.0846	0.949222	0.204825	3.58141e-06	1.40641e-05	94.1312	17.9674	0.646956	0.210891	0.00215691	0.00618251
FBgn0003996	w	X	2790599	2796466	-	2352	0	0	0	0	0	4.08046	1	NA	0.37527	0.159554	0.704067	4.08052	0.86301	NA
FBgn0003997	hid	3L	18167745	18185641	-	4018	40.5174	10.084	58.3242	14.5157	0.492907	0.248803	0.0475784	0.0899775	110.111	27.4044	1.4341	0.241572	2.91134e-09	1.93544e-08
FBgn0004003	wbl	2R	19249395	19250917	+	1319	0.365555	0.277146	0	0	-1.52464	4.08046	0.708668	NA	0	0	-1.21951	4.08052	0.765046	NA
FBgn0004034	y	X	356509	361245	+	2038	40.0046	19.6294	2.93623	1.44074	-3.7768	0.559777	1.50967e-11	9.9435e-11	5.73194	2.81253	-2.81753	0.495022	1.25758e-08	7.78694e-08
FBgn0004045	Yp1	X	10053811	10055498	+	1611	0	0	0	0	0	4.08046	1	NA	0.37527	0.232942	0.704067	4.08052	0.86301	NA
FBgn0004047	Yp3	X	13759546	13761547	+	1868	5.93867	3.17916	5.83349	3.12285	-0.0236279	0.678478	0.972219	0.982437	7.32479	3.92119	0.303387	0.677346	0.654221	0.759346
FBgn0004049	yrt	3R	13428867	13434984	-	4464	902.973	202.279	1167.7	261.583	0.367562	0.076522	1.56032e-06	6.40707e-06	1081.49	242.27	0.258702	0.0775346	0.000848085	0.00263307
FBgn0004050	z	X	2447769	2450550	+	2599	591.122	227.442	764.416	294.119	0.371939	0.0881498	2.44961e-05	8.54924e-05	768.742	295.784	0.378637	0.0890696	2.12797e-05	8.6619e-05
FBgn0004052	Z600	3L	15509061	15509513	+	453	0.365555	0.806965	0	0	-1.52464	4.08046	0.708668	NA	0	0	-1.21951	4.08052	0.765046	NA
FBgn0004053	zen	3R	6752864	6754194	-	1267	0	0	0	0	NA	NA	NA	NA	0	0	NA	NA	NA	NA
FBgn0004054	zen2	3R	6743135	6744136	-	1002	0	0	0	0	NA	NA	NA	NA	0	0	NA	NA	NA	NA
FBgn0004055	uzip	2R	25012062	25031737	+	4114	1410.28	342.8	1633.74	397.118	0.210784	0.0706972	0.0028684	0.00720124	692.919	168.43	-1.02428	0.0751963	2.98728e-42	1.4473e-40
FBgn0004057	Zw	X	19667252	19672353	+	2512	1080.09	429.973	511.727	203.713	-1.07869	0.0999308	3.66103e-27	6.58532e-26	616.22	245.311	-0.810127	0.100022	5.51877e-16	6.66008e-15
FBgn0004066	Prosalpha4	X	16276270	16277587	+	1176	5111.54	4346.54	4146.91	3526.28	-0.301462	0.0987379	0.0022645	0.00580725	3216.64	2735.24	-0.668587	0.0991367	1.53984e-11	1.28195e-10
FBgn0004087	Dhfr	3R	16481167	16481878	+	662	297.34	449.154	465.096	702.563	0.650585	0.118442	3.95447e-08	1.9481e-07	411.232	621.196	0.472682	0.120415	8.65667e-05	0.000322619
FBgn0004101	bs	2R	24342861	24376473	+	4791	325.191	67.8754	406.585	84.8643	0.320529	0.101857	0.00165039	0.00434418	414.681	86.5542	0.346935	0.103256	0.000779614	0.0024434
FBgn0004102	oc	X	8630159	8650681	-	5041	0	0	0	0	0	4.08046	1	NA	0.37527	0.0744435	0.704067	4.08052	0.86301	NA
FBgn0004103	Pp1-87B	3R	12423621	12425917	-	2203	17135.4	7778.2	19112.1	8675.49	0.157308	0.0674484	0.0196865	0.0415839	19139.1	8687.76	0.159373	0.0674962	0.0182154	0.0416376
FBgn0004106	Cdk1	2L	10384739	10386262	-	1082	224.929	207.883	421.884	389.911	0.911567	0.114618	1.81941e-15	1.61209e-14	357.12	330.055	0.668011	0.117241	1.21393e-08	7.53079e-08
FBgn0004107	Cdk2	3R	20735623	20738414	+	2299	231.864	100.854	751.574	326.913	1.6958	0.110475	3.53631e-53	1.6486e-51	518.654	225.6	1.15731	0.113107	1.42464e-24	3.01054e-23
FBgn0004108	Nrt	3L	16766072	16777465	+	4281	1076.95	251.565	1025.73	239.6	-0.0722664	0.0920596	0.432456	0.554768	723.952	169.108	-0.574134	0.0942458	1.1159e-09	7.7342e-09
FBgn0004110	tin	3R	21378977	21381970	+	1664	2.66393	1.60092	4.17221	2.50734	0.624798	0.976991	0.52249	0.63708	3.81985	2.29558	0.515522	0.999249	0.605918	0.720026
FBgn0004117	Tm2	3R	15310193	15315197	+	2613	0.724079	0.277107	0.222156	0.0850193	-1.36203	2.60038	0.600431	NA	0.32456	0.12421	-1.05687	2.60039	0.68443	NA
FBgn0004118	nAChRbeta2	3R	24509228	24515106	-	4018	76.4451	19.0257	22.5868	5.6214	-1.79204	0.274383	6.52503e-11	4.08086e-10	42.9055	10.6783	-0.828795	0.256938	0.0012568	0.00378374
FBgn0004132	boca	2R	7565873	7566738	-	704	221.556	314.71	280.367	398.249	0.347196	0.128	0.00667821	0.015624	248.654	353.201	0.176645	0.130987	0.177475	0.28564
FBgn0004133	blow	2R	7580488	7587079	-	2848	1522.88	534.719	1090.47	382.889	-0.480916	0.0766043	3.43135e-10	2.0334e-09	1631.65	572.909	0.0988452	0.0759805	0.193283	0.305245
FBgn0004143	nullo	X	7049476	7050321	+	846	0	0	0	0	NA	NA	NA	NA	0	0	NA	NA	NA	NA
FBgn0004167	kst	3L	3336860	3368133	+	14454	24153	1671.02	18862.8	1305.02	-0.356866	0.0771819	3.76961e-06	1.47698e-05	19347.5	1338.56	-0.320245	0.0772185	3.36483e-05	0.000133305
FBgn0004168	5-HT1A	2R	19067155	19121958	+	5019	1.44816	0.288535	7.38091	1.47059	2.26808	0.965611	0.0188312	0.0399878	5.9401	1.18352	1.93885	0.986671	0.0494097	0.0993797
FBgn0004169	up	X	13593474	13602578	-	2530	1.58836	0.627811	0	0	-3.4072	2.01008	0.0900638	0.15564	1.00942	0.398979	-0.658377	1.82939	0.71893	0.80628
FBgn0004170	sc	X	396060	397497	+	1438	0	0	0	0	0	3.70715	1	NA	0.684856	0.476256	1.62416	3.65808	0.657048	NA
FBgn0004171	Mst98Cb	3R	28292798	28293863	+	1066	0.358524	0.336327	0.253458	0.237765	-0.562881	3.85889	0.884027	NA	0	0	-1.21951	3.85894	0.751986	NA
FBgn0004172	Mst84Da	3R	7365850	7366262	+	358	0	0	0	0	NA	NA	NA	NA	0	0	NA	NA	NA	NA
FBgn0004173	Mst84Db	3R	7365160	7365627	-	415	0	0	0	0	NA	NA	NA	NA	0	0	NA	NA	NA	NA
FBgn0004174	Mst84Dc	3R	7364254	7364673	-	363	0.358524	0.98767	0	0	-1.52464	4.08046	0.708668	NA	0	0	-1.21951	4.08052	0.765046	NA
FBgn0004175	Mst84Dd	3R	7363307	7363773	-	415	0	0	0	0	NA	NA	NA	NA	0	0	NA	NA	NA	NA
FBgn0004177	mts	2L	7827650	7833576	+	3102	17763.6	5726.51	22766.8	7339.39	0.357766	0.0708869	4.48796e-07	1.98051e-06	22255.2	7174.46	0.325078	0.0709303	4.58215e-06	2.07808e-05
FBgn0004179	Csp	3L	22267382	22273745	+	3081	2279.28	739.785	1777.52	576.931	-0.358952	0.0693979	2.31143e-07	1.05768e-06	1714.41	556.447	-0.410645	0.0700112	4.48e-09	2.92156e-08
FBgn0004181	Ebp	2R	25175126	25176715	-	1529	0	0	0	0	NA	NA	NA	NA	0	0	NA	NA	NA	NA
FBgn0004183	snRNA:U1:82Eb	3R	4947933	4948096	-	164	0	0	0.253458	1.54547	0.398902	4.08046	0.922124	NA	0	0	0	4.08052	1	NA
FBgn0004185	snRNA:U1:95Ca	3R	23859467	23859630	-	164	0	0	0	0	0	4.08046	1	NA	0.32456	1.97902	0.704067	4.08052	0.86301	NA
FBgn0004186	snRNA:U1:95Cb	3R	23827870	23828033	+	164	0	0	0	0	NA	NA	NA	NA	0	0	NA	NA	NA	NA
FBgn0004187	snRNA:U1:95Cc	3R	23826334	23826497	+	164	0.358524	2.18612	0	0	-1.52464	4.08046	0.708668	NA	0	0	-1.21951	4.08052	0.765046	NA
FBgn0004188	snRNA:U6:96Aa	3R	24556088	24556194	+	107	0	0	0	0	0	4.08046	1	NA	0.37527	3.5072	0.704067	4.08052	0.86301	NA
FBgn0004189	snRNA:U6:96Ab	3R	24556692	24556798	+	107	0	0	0.577181	5.39421	1.35181	3.01021	0.653378	NA	0.37527	3.5072	0.70407	3.07218	0.818732	NA
FBgn0004190	snRNA:U6:96Ac	3R	24557215	24557321	+	107	0	0	0	0	NA	NA	NA	NA	0	0	NA	NA	NA	NA
FBgn0004191	snRNA:U2:34ABa	2L	13211925	13212116	-	192	1.92579	10.0302	0	0	-3.69215	2.48669	0.137607	0.222691	0	0	-3.387	2.48671	0.173185	0.280582
FBgn0004192	snRNA:U2:34ABb	2L	13215839	13216030	+	192	0	0	0.222156	1.15706	0.398902	4.08046	0.922124	NA	0	0	0	4.08052	1	NA
FBgn0004197	Ser	3R	27172090	27194267	-	5831	20.9986	3.6012	132.742	22.7649	2.68134	0.260342	7.09644e-25	1.13577e-23	70.3718	12.0686	1.76603	0.270921	7.09696e-11	5.57209e-10
FBgn0004198	ct	X	7608428	7678859	+	12443	4087.57	328.503	2271.05	182.517	-0.849698	0.0922876	3.35156e-20	4.0989e-19	3922.38	315.228	-0.0604657	0.0918814	0.510484	0.63883
FBgn0004227	nonA	X	16361569	16371547	+	8029	1558.83	194.15	2399.34	298.834	0.620439	0.0651552	1.69096e-21	2.24058e-20	2393.75	298.138	0.616413	0.0655639	5.36819e-21	9.27249e-20
FBgn0004228	mex1	3L	15517424	15519592	-	1219	1.93985	1.59135	0.830638	0.681409	-1.27866	1.38025	0.35424	0.475768	2.32842	1.91011	0.248252	1.22906	0.839929	0.895275
FBgn0004237	Hrb87F	3R	13656846	13660531	-	2759	7230.27	2620.61	14937.1	5413.94	1.04666	0.0770547	5.02361e-42	1.64693e-40	14745.9	5344.66	1.02791	0.0771126	1.54992e-40	6.87224e-39
FBgn0004240	DptA	2R	18865765	18866260	+	496	0	0	0	0	NA	NA	NA	NA	0	0	NA	NA	NA	NA
FBgn0004242	Syt1	2L	2772327	2799979	-	7190	2.19917	0.305865	1.37652	0.191449	-0.639112	1.39462	0.646758	0.743063	1.26829	0.176397	-0.692135	1.43587	0.629782	0.740675
FBgn0004244	Rdl	3L	9145838	9182149	-	8994	1.95392	0.217247	0.355025	0.0394735	-2.75283	1.85694	0.13822	0.22347	1.00942	0.112232	-0.966413	1.65966	0.560368	0.681305
FBgn0004359	T48	3R	26881734	26910997	+	2449	19.0177	7.76551	7.05811	2.88204	-1.44561	0.549531	0.00852301	0.0195001	7.6025	3.10433	-1.34827	0.560766	0.0162019	0.0375011
FBgn0004360	Wnt2	2R	9494166	9503188	+	2240	0.365555	0.163194	0.982528	0.438629	1.23013	2.20596	0.577089	0.6842	0.928759	0.414625	1.14596	2.24398	0.609573	0.723244
FBgn0004362	HmgD	2R	21701458	21716727	+	1965	17025.6	8664.42	54989.5	27984.5	1.69127	0.0617182	2.51997e-165	8.83119e-163	43196.1	21982.7	1.34305	0.0617646	7.76482e-105	1.97744e-102
FBgn0004363	porin	2L	10847227	10850848	-	2858	14246.1	4984.65	18854	6596.93	0.404369	0.056586	8.92784e-13	6.5323e-12	19051.4	6665.98	0.419445	0.0566409	1.30817e-13	1.30712e-12
FBgn0004364	18w	2R	20111511	20116932	+	5422	422.915	77.9998	675.656	124.614	0.670354	0.0972422	5.43788e-12	3.70658e-11	417.973	77.0884	-0.0183504	0.101385	0.85637	0.906573
FBgn0004367	mei-41	X	16391698	16399850	+	7899	77.5379	9.81617	113.504	14.3694	0.531155	0.187065	0.00451958	0.0109493	120.792	15.292	0.620247	0.189135	0.00104034	0.00318222
FBgn0004368	Ptp4E	X	4939128	4955916	+	7229	594.976	82.3041	360.064	49.8082	-0.730492	0.101714	6.87694e-13	5.09034e-12	432.597	59.8419	-0.462629	0.101867	5.58569e-06	2.50122e-05
FBgn0004369	Ptp99A	3R	29377646	29487131	+	9139	805.68	88.1585	639.197	69.9417	-0.341535	0.101533	0.000768846	0.00213959	565.879	61.9192	-0.512929	0.103184	6.6598e-07	3.3289e-06
FBgn0004370	Ptp10D	X	11622015	11677338	+	8708	647.658	74.3751	739.159	84.8827	0.186654	0.0868292	0.0315815	0.0629462	654.188	75.125	0.0134598	0.0885069	0.879127	0.921007
FBgn0004372	aly	3L	3024129	3026521	-	2267	0	0	0	0	NA	NA	NA	NA	0	0	NA	NA	NA	NA
FBgn0004373	fwd	3L	305393	319884	-	7436	2510.2	337.574	2624.28	352.915	0.0623387	0.0762948	0.413885	0.53604	2482.67	333.872	-0.0162361	0.076705	0.832365	0.890558
FBgn0004374	neb	2L	20075757	20089698	+	3592	364.45	101.462	342.259	95.2836	-0.0915253	0.123071	0.45707	0.576685	323.758	90.1331	-0.173424	0.125054	0.165504	0.270805
FBgn0004378	Klp61F	3L	1241568	1245910	-	3871	811.823	209.719	1226.84	316.931	0.597778	0.0794849	5.45015e-14	4.38906e-13	1121.54	289.73	0.466283	0.0804705	6.85399e-09	4.38055e-08
FBgn0004379	Klp67A	3L	9362636	9367046	-	3086	896.909	290.638	1557.18	504.595	0.797171	0.0740908	5.35325e-27	9.52803e-26	1367.82	443.235	0.610916	0.0750519	3.95552e-16	4.8382e-15
FBgn0004380	Klp64D	3L	5356864	5359392	-	2529	128.198	50.6911	117.49	46.4571	-0.126779	0.168159	0.450895	0.57152	129.065	51.0341	0.00489419	0.169917	0.977021	0.984755
FBgn0004381	Klp68D	3L	11795614	11798875	+	2998	258.728	86.3002	136.718	45.6031	-0.917025	0.141477	9.06429e-11	5.59662e-10	148.436	49.5116	-0.796796	0.14341	2.7593e-08	1.64556e-07
FBgn0004387	Klp98A	3R	27547775	27559145	-	5530	547.373	98.9825	438.595	79.312	-0.323497	0.0990614	0.00109223	0.00296247	414.845	75.0172	-0.403146	0.100983	6.54634e-05	0.000248731
FBgn0004389	bnk	3R	31193362	31194389	+	1028	0.358524	0.348759	0	0	-1.52464	4.08046	0.708668	NA	0	0	-1.21951	4.08052	0.765046	NA
FBgn0004390	RasGAP1	3L	9839093	9855285	-	5434	772.288	142.121	1129.34	207.828	0.546865	0.0918033	2.57029e-09	1.4044e-08	1012.34	186.297	0.392428	0.0927909	2.34563e-05	9.47409e-05
FBgn0004391	shtd	X	15455544	15462441	-	6481	377.251	58.2088	442.127	68.2189	0.222694	0.108286	0.039731	0.0769565	474.553	73.2222	0.325716	0.109122	0.00283688	0.0079168
FBgn0004394	pdm2	2L	12657165	12686306	+	4624	1.09667	0.237168	0.86194	0.186406	-0.436764	1.92414	0.82043	0.877318	0.684856	0.148109	-0.748631	2.01451	0.710177	0.800167
FBgn0004395	unk	3R	23149653	23157862	-	6328	1769.41	279.615	1620.57	256.095	-0.130004	0.0822151	0.113816	0.189718	1584.39	250.378	-0.160023	0.0827421	0.053114	0.105696
FBgn0004396	CrebA	3L	15535395	15553214	+	4498	1156.8	257.18	556.871	123.804	-1.06276	0.0912273	2.30614e-31	5.09507e-30	766.651	170.443	-0.595875	0.0905859	4.76794e-11	3.79753e-10
FBgn0004397	Vinc	X	2214347	2222567	-	3933	1022.52	259.985	482.304	122.63	-1.0796	0.0865784	1.09338e-35	2.84344e-34	593.045	150.787	-0.785708	0.0865887	1.14696e-19	1.79396e-18
FBgn0004400	rhi	2R	17628491	17633516	-	1570	0	0	0	0	NA	NA	NA	NA	0	0	NA	NA	NA	NA
FBgn0004401	Pep	3L	17638103	17645036	-	2792	9099.34	3259.07	14667.5	5253.42	0.688612	0.0534076	4.89535e-38	1.38583e-36	13176.1	4719.23	0.534134	0.0535374	1.92525e-23	3.82432e-22
FBgn0004403	RpS14a	X	7933742	7934677	+	877	2077.54	2368.92	1814.59	2069.09	-0.192873	0.0820307	0.0187115	0.0397585	2188.63	2495.59	0.0768301	0.0820526	0.349092	0.483616
FBgn0004404	RpS14b	X	7934898	7935792	+	597	772.216	1293.49	893.165	1496.09	0.210937	0.196379	0.282762	0.399514	1124.12	1882.94	0.541776	0.196325	0.0057875	0.0150239
FBgn0004406	tam	2L	13823980	13827772	-	3679	317.737	86.3651	338.405	91.983	0.097954	0.107045	0.360154	0.481864	329.702	89.6174	0.0576326	0.109087	0.597277	0.712572
FBgn0004407	DNApol-gamma35	2L	13831482	13833105	-	1570	0	0	0	0	NA	NA	NA	NA	0	0	NA	NA	NA	NA
FBgn0004414	msopa	3L	22082720	22083367	+	648	0	0	0.355025	0.547878	0.398902	4.08046	0.922124	NA	0	0	0	4.08052	1	NA
FBgn0004419	me31B	2L	10239341	10242172	+	1845	2208.49	1197.02	2832.72	1535.35	0.359516	0.0698244	2.62075e-07	1.19224e-06	2377.27	1288.49	0.105349	0.070479	0.134979	0.230781
FBgn0004425	LysB	3L	1207371	1207981	+	611	0	0	0.222156	0.363593	0.398902	4.08046	0.922124	NA	0	0	0	4.08052	1	NA
FBgn0004426	LysC	3L	1210485	1210726	+	242	0	0	0	0	NA	NA	NA	NA	0	0	NA	NA	NA	NA
FBgn0004427	LysD	3L	1210717	1211196	-	480	0	0	0	0	NA	NA	NA	NA	0	0	NA	NA	NA	NA
FBgn0004428	LysE	3L	1212827	1213406	+	580	0	0	0	0	0	4.08046	1	NA	0.309586	0.53377	0.704067	4.08052	0.86301	NA
FBgn0004429	LysP	3L	1218082	1218696	-	615	0	0	0	0	NA	NA	NA	NA	0	0	NA	NA	NA	NA
FBgn0004430	LysS	3L	1227747	1228238	+	492	0.724079	1.47171	0	0	-2.31347	2.93026	0.429813	NA	0.309586	0.629241	-1.04654	2.93028	0.720983	NA
FBgn0004431	LysX	3L	1194739	1195302	-	564	0.491696	0.871802	0	0	-1.52464	4.08046	0.708668	NA	0	0	-1.21951	4.08052	0.765046	NA
FBgn0004432	Cyp1	X	16317673	16320370	-	1227	6719.26	5476.17	6936.36	5653.11	0.0456977	0.0807173	0.571295	0.679868	7173.62	5846.47	0.0948273	0.0808076	0.240597	0.362887
FBgn0004435	Galphaq	2R	12612740	12623197	+	6910	290.045	41.9747	246.716	35.7042	-0.236329	0.148686	0.111958	0.187265	240.43	34.7946	-0.2678	0.150631	0.0754271	0.142694
FBgn0004436	Ubc6	3R	4948755	4952682	-	2166	3344.97	1544.31	1852.59	855.304	-0.85186	0.0623308	1.60405e-42	5.41593e-41	2144.22	989.946	-0.640967	0.0624686	1.06007e-24	2.26909e-23
FBgn0004449	Ten-m	3L	22293044	22407863	-	13109	1184.39	90.3495	868.382	66.2432	-0.452437	0.0848415	9.67434e-08	4.60086e-07	1115.25	85.075	-0.0888164	0.0846491	0.294072	0.424709
FBgn0004456	mew	X	13214409	13258490	-	5204	162.898	31.3024	4.54626	0.873608	-5.09694	0.399406	2.6963e-37	7.38612e-36	18.5728	3.56894	-3.11011	0.282049	2.83617e-28	7.24135e-27
FBgn0004463	RpIII128	2R	12039041	12042623	+	3532	145.614	41.2272	244.534	69.2339	0.741926	0.13309	2.48083e-08	1.24877e-07	239.663	67.8547	0.71553	0.135271	1.22588e-07	6.74539e-07
FBgn0004465	Su(P)	3L	16610662	16612199	-	1412	209.299	148.229	200.956	142.32	-0.065024	0.136576	0.634003	0.732451	178.758	126.599	-0.236072	0.140488	0.0928851	0.169771
FBgn0004507	GlyP	2L	2130813	2137296	+	3144	6319.66	2010.07	4819.9	1533.05	-0.390611	0.0610838	1.60884e-10	9.77325e-10	5667.71	1802.71	-0.157169	0.0611189	0.0101251	0.0247631
FBgn0004509	Fur1	3R	25347431	25473058	-	9128	1461.05	160.063	1382.69	151.478	-0.0814965	0.0720134	0.257767	0.371593	1220.82	133.744	-0.259987	0.0731057	0.000376096	0.00125097
FBgn0004510	Ets97D	3R	26910775	26912886	-	1858	204.247	109.929	305.251	164.29	0.570808	0.130427	1.20617e-05	4.40469e-05	305.325	164.33	0.570423	0.132035	1.55861e-05	6.46893e-05
FBgn0004511	dy	X	11769769	11778784	-	4075	117.847	28.9195	26.0925	6.40307	-2.20452	0.242489	9.79199e-20	1.15716e-18	32.211	7.90454	-1.86742	0.241646	1.09332e-14	1.18417e-13
FBgn0004512	Mdr49	2R	12940323	12946347	-	4396	133.124	30.283	8.40029	1.91089	-4.04202	0.338739	8.00833e-33	1.85396e-31	8.48634	1.93047	-3.98943	0.358756	1.00097e-28	2.60935e-27
FBgn0004513	Mdr65	3L	6240500	6245746	-	4135	5.24856	1.2693	3.78588	0.91557	-0.371141	0.850997	0.662746	0.755784	4.0734	0.985103	-0.311605	0.866503	0.719137	0.80642
FBgn0004514	Oct-TyrR	3L	22035003	22065279	+	3682	0	0	0	0	NA	NA	NA	NA	0	0	NA	NA	NA	NA
FBgn0004516	Gad1	3L	4074077	4088744	-	3684	299.619	81.3297	389.458	105.716	0.379976	0.112305	0.000715833	0.00200335	218.689	59.3619	-0.446788	0.119717	0.000189945	0.00066264
FBgn0004552	Akh	3L	4141467	4142070	+	536	2.32531	4.33826	1.36424	2.54521	-0.599102	1.47487	0.684591	0.774605	1.26829	2.36622	-0.757779	1.52353	0.618918	0.732059
FBgn0004554	Edg91	3R	17610856	17611511	-	604	0	0	0	0	NA	NA	NA	NA	0	0	NA	NA	NA	NA
FBgn0004556	Dbp73D	3L	16728496	16730818	-	2209	204.264	92.4689	507.164	229.59	1.31005	0.114882	4.01757e-30	8.45353e-29	384.099	173.879	0.906058	0.117877	1.51225e-14	1.622e-13
FBgn0004567	slp2	2L	3836840	3839185	+	2346	0.491696	0.209589	0	0	-1.52464	4.08046	0.708668	NA	0	0	-1.21951	4.08052	0.765046	NA
FBgn0004569	aos	3L	16470386	16483650	-	2822	906.927	321.378	2242.56	794.67	1.30673	0.0954462	1.153e-42	3.93218e-41	1141.37	404.453	0.331418	0.0972975	0.000658649	0.00209536
FBgn0004573	5-HT7	3R	30968236	31016875	-	4486	12.7756	2.84788	9.70192	2.16271	-0.38011	0.553719	0.492418	0.610388	4.26081	0.9498	-1.54117	0.639834	0.0160096	0.0371252
FBgn0004574	Rop	3L	4136359	4138996	-	2638	691.637	262.182	356.326	135.074	-0.954734	0.0910504	1.00424e-25	1.67313e-24	415.462	157.491	-0.734899	0.0915426	9.91208e-16	1.17059e-14
FBgn0004575	Syn	3R	10190689	10222442	+	5803	247.318	42.619	38.054	6.55765	-2.70091	0.197768	1.83519e-42	6.15545e-41	125.583	21.6411	-0.971822	0.172809	1.86948e-08	1.13563e-07
FBgn0004577	Pxd	3R	17014576	17027987	+	2630	0	0	0	0	NA	NA	NA	NA	0	0	NA	NA	NA	NA
FBgn0004580	Cbp53E	2R	16973927	16996057	+	2754	0.85022	0.308722	0	0	-2.47601	2.77361	0.372016	NA	0.37527	0.136264	-1.20907	2.77363	0.662897	NA
FBgn0004581	bgcn	2R	23853270	23858921	-	4159	8.40419	2.02072	5.17468	1.24421	-0.677997	0.680087	0.3188	0.438129	9.03018	2.17124	0.162696	0.654391	0.803653	0.870245
FBgn0004583	ex	2L	431227	448701	+	6672	2549.86	382.173	3357.04	503.153	0.394435	0.0694566	1.35582e-08	6.99095e-08	3263.73	489.169	0.354568	0.0697669	3.73125e-07	1.92914e-06
FBgn0004584	Rrp1	2L	2969773	2972508	-	2551	1383.14	542.193	1811.51	710.118	0.387928	0.0769986	4.70147e-07	2.06665e-06	1435.53	562.733	0.0522553	0.0780996	0.503441	0.633014
FBgn0004587	B52	3R	13661311	13666891	+	4313	2115.54	490.503	4053.86	939.916	0.937393	0.0834576	2.84095e-29	5.69479e-28	3716.13	861.611	0.812475	0.0837353	2.93057e-22	5.47113e-21
FBgn0004588	Eig71Ea	3L	15649126	15649661	-	412	0	0	0	0	NA	NA	NA	NA	0	0	NA	NA	NA	NA
FBgn0004589	Eig71Eb	3L	15649936	15650541	+	472	0	0	0	0	NA	NA	NA	NA	0	0	NA	NA	NA	NA
FBgn0004590	Eig71Ec	3L	15651479	15652254	-	639	0	0	0	0	NA	NA	NA	NA	0	0	NA	NA	NA	NA
FBgn0004591	Eig71Ed	3L	15652537	15653096	+	415	0	0	0	0	NA	NA	NA	NA	0	0	NA	NA	NA	NA
FBgn0004592	Eig71Ee	3L	15654472	15656010	-	1486	0.365555	0.246	0	0	-1.52465	3.6901	0.679481	NA	0.32456	0.218412	-0.257722	3.69015	0.944321	NA
FBgn0004593	Eig71Ef	3L	15656655	15657390	-	420	0	0	0	0	NA	NA	NA	NA	0	0	NA	NA	NA	NA
FBgn0004594	Eig71Eg	3L	15657628	15658149	+	413	0	0	0	0	NA	NA	NA	NA	0	0	NA	NA	NA	NA
FBgn0004595	pros	3R	11328480	11407627	+	24892	9.24034	0.371217	0.253458	0.0101823	-4.96294	1.41862	0.000468029	0.0013513	1.319	0.052989	-2.77318	1.07182	0.00967166	0.023777
FBgn0004597	CycC	3R	14889004	14890205	-	1142	157.61	138.012	197.093	172.586	0.326482	0.141974	0.0214714	0.0449093	180.954	158.453	0.199065	0.145396	0.17096	0.277628
FBgn0004598	Fur2	X	16373086	16381782	+	6474	1007.83	155.673	1118.88	172.827	0.147723	0.07393	0.0457008	0.0868469	1189.11	183.675	0.236802	0.0744477	0.00146878	0.00436894
FBgn0004606	zfh1	3R	30765926	30789202	+	6915	9807.7	1418.32	8179.74	1182.9	-0.262706	0.0871646	0.00257907	0.00654296	8804.85	1273.3	-0.156064	0.0872168	0.0735539	0.14003
FBgn0004607	zfh2	4	501810	540874	+	12424	12463.9	1003.21	20929.7	1684.61	0.747493	0.0689721	2.28374e-27	4.15199e-26	17732.2	1427.25	0.508352	0.0690588	1.82338e-13	1.7984e-12
FBgn0004611	Plc21C	2L	305935	355566	+	7774	410.168	52.7616	351.291	45.1879	-0.228396	0.106321	0.0317002	0.0630997	310.804	39.9799	-0.402557	0.109216	0.000227921	0.000786284
FBgn0004618	gl	3R	18367927	18372738	-	3399	0.365555	0.107548	0	0	-1.52464	4.08046	0.708668	NA	0	0	-1.21951	4.08052	0.765046	NA
FBgn0004619	GluRIA	3L	6624032	6635059	+	3810	0	0	0	0	NA	NA	NA	NA	0	0	NA	NA	NA	NA
FBgn0004620	GluRIIA	2L	5555072	5558994	+	3253	88.4319	27.1847	58.3244	17.9294	-0.617227	0.236837	0.00915732	0.0208085	22.8432	7.02221	-1.95629	0.276887	1.60291e-12	1.45257e-11
FBgn0004622	TkR99D	3R	29950796	29969447	-	2880	1.20874	0.419703	0	0	-3.0082	2.9352	0.305424	NA	0	0	-2.70305	2.93523	0.357102	NA
FBgn0004623	Gbeta76C	3L	19687637	19689992	+	1466	0	0	0.222156	0.151539	0.398902	4.08046	0.922124	NA	0	0	0	4.08052	1	NA
FBgn0004629	Cys	3R	14569103	14569644	-	484	788.799	1629.75	404.607	835.965	-0.964381	0.107724	3.48052e-19	3.95224e-18	480.016	991.769	-0.711875	0.107911	4.19885e-11	3.35773e-10
FBgn0004635	rho	3L	1463811	1468944	+	3000	88.9134	29.6378	91.6668	30.5556	0.0269132	0.199946	0.892926	0.929606	106.757	35.5855	0.25881	0.200676	0.197158	0.310329
FBgn0004636	Rap1	3L	1859115	1862239	-	3012	24289	8064.07	23969.8	7958.09	-0.0192752	0.0813272	0.81265	0.872211	23903.8	7936.2	-0.0231746	0.0813596	0.775765	0.849961
FBgn0004638	drk	2R	13495222	13502841	-	2946	1652.9	561.067	1526.88	518.288	-0.114408	0.0712388	0.10828	0.181983	1453.34	493.325	-0.186143	0.0719813	0.00971009	0.0238537
FBgn0004643	Zw10	X	2604197	2606824	+	2567	245.016	95.4483	331.014	128.95	0.437355	0.111883	9.26675e-05	0.000298032	317.225	123.578	0.372368	0.114045	0.00109431	0.00332987
FBgn0004644	hh	3R	23128169	23141906	-	2370	175.971	74.2495	370.781	156.448	1.0712	0.125169	1.14798e-17	1.18566e-16	176.494	74.4701	-0.00468034	0.134514	0.972244	0.981895
FBgn0004646	ogre	X	6973620	6991318	-	3940	147.132	37.3431	199.592	50.6579	0.436153	0.144377	0.00251996	0.00640579	250.257	63.517	0.766388	0.144151	1.05745e-07	5.86738e-07
FBgn0004647	N	X	3134870	3172221	+	10150	2579.54	254.141	3603.35	355.009	0.480301	0.0654353	2.13459e-13	1.64972e-12	3755.82	370.031	0.540508	0.0656405	1.80496e-16	2.26635e-15
FBgn0004648	svr	X	496446	509072	+	8583	1895.64	220.859	1297.5	151.171	-0.549647	0.0736449	8.42671e-14	6.6959e-13	1391.29	162.098	-0.446843	0.0740573	1.60205e-09	1.09132e-08
FBgn0004649	yl	X	14193214	14199958	+	6351	0.724079	0.11401	0	0	-2.31504	2.87256	0.420292	NA	0.37527	0.0590883	-1.0481	2.87258	0.715213	NA
FBgn0004650	fs(1)N	X	1322513	1329438	+	6581	808	122.778	778.56	118.304	-0.0555391	0.0938849	0.554142	0.66514	644.281	97.9001	-0.328703	0.0957344	0.000595863	0.00190969
FBgn0004652	fru	3R	18414273	18545586	-	18433	5090.96	276.187	7020.76	380.88	0.46241	0.0801062	7.81228e-09	4.09893e-08	6034.92	327.397	0.244725	0.0803181	0.00231179	0.00658654
FBgn0004654	Pgd	X	2145136	2148566	+	1895	447.41	236.101	351.356	185.412	-0.349218	0.105513	0.000933881	0.00256168	428.423	226.081	-0.0642085	0.105571	0.543054	0.666454
FBgn0004655	wapl	X	2149936	2158983	-	7054	1472.42	208.736	1926.01	273.038	0.385339	0.074667	2.45936e-07	1.12184e-06	1849.94	262.253	0.328104	0.0752022	1.28318e-05	5.41168e-05
FBgn0004656	fs(1)h	X	8037808	8061436	-	15685	5118.87	326.354	7105.35	453.003	0.471989	0.0754097	3.87471e-10	2.28415e-09	7253.56	462.452	0.502117	0.0755124	2.94171e-11	2.3968e-10
FBgn0004657	mys	X	8061645	8070237	+	4482	6836.36	1525.29	3473.43	774.973	-0.978043	0.0655836	2.7162e-50	1.18475e-48	3723.22	830.704	-0.877278	0.0657552	1.32624e-40	5.90681e-39
FBgn0004666	sim	3R	13057755	13078124	+	3547	0.358524	0.101078	0.222156	0.0626319	-0.56288	3.93592	0.886282	NA	0	0	-1.21951	3.93598	0.756685	NA
FBgn0004687	Mlc-c	X	5619136	5622539	-	1399	3824.63	2733.83	3108.27	2221.78	-0.298482	0.0573887	1.98155e-07	9.13723e-07	3487.24	2492.67	-0.132335	0.0575288	0.0214299	0.0480999
FBgn0004698	Xpc	2R	15311510	15318239	+	4830	884.162	183.056	942.791	195.195	0.0910491	0.0779053	0.242519	0.353212	909.472	188.296	0.0384734	0.0789459	0.626018	0.737807
FBgn0004777	Ccp84Ag	3R	6686728	6688039	+	1097	0	0	0	0	NA	NA	NA	NA	0	0	NA	NA	NA	NA
FBgn0004778	Ccp84Af	3R	6689602	6690239	-	580	0	0	0	0	NA	NA	NA	NA	0	0	NA	NA	NA	NA
FBgn0004779	Ccp84Ae	3R	6690887	6691758	-	754	0	0	0	0	NA	NA	NA	NA	0	0	NA	NA	NA	NA
FBgn0004780	Ccp84Ad	3R	6692732	6693527	+	735	0	0	0	0	NA	NA	NA	NA	0	0	NA	NA	NA	NA
FBgn0004781	Ccp84Ac	3R	6695148	6696271	-	1060	0	0	0	0	NA	NA	NA	NA	0	0	NA	NA	NA	NA
FBgn0004782	Ccp84Ab	3R	6701968	6702877	-	834	0	0	0	0	NA	NA	NA	NA	0	0	NA	NA	NA	NA
FBgn0004783	Ccp84Aa	3R	6704084	6704903	+	765	0	0	0	0	NA	NA	NA	NA	0	0	NA	NA	NA	NA
FBgn0004784	inaC	2R	16898535	16901575	+	2351	0	0	0	0	NA	NA	NA	NA	0	0	NA	NA	NA	NA
FBgn0004795	retn	2R	23632610	23654820	+	4477	2.42452	0.54155	6.29008	1.40498	1.37919	0.861572	0.109424	0.1836	6.95531	1.55356	1.54425	0.866723	0.0747968	0.141995
FBgn0004797	mdy	2L	16816660	16826964	+	2689	47.2622	17.5761	59.7255	22.2111	0.334128	0.247879	0.177674	0.275385	51.1088	19.0066	0.111624	0.256136	0.662981	0.765488
FBgn0004811	fs(2)ltoPP43	2L	19792773	19795851	-	2435	1126.83	462.764	1338.03	549.499	0.247462	0.0743647	0.000875713	0.00241058	1185.55	486.877	0.0743645	0.0754427	0.324276	0.458333
FBgn0004828	His3.3B	X	9152523	9156669	-	2552	4726.87	1852.22	4942.53	1936.73	0.0644764	0.0675222	0.339632	0.460531	4181.18	1638.39	-0.177096	0.0678993	0.00910161	0.0225037
FBgn0004832	Xpac	X	4102955	4104197	-	1178	369.297	313.495	607.013	515.292	0.710423	0.102393	3.97161e-12	2.74208e-11	578.683	491.242	0.645065	0.103677	4.91287e-10	3.5384e-09
FBgn0004837	Su(H)	2L	15039488	15043334	+	2950	379.968	128.803	651.371	220.804	0.774027	0.101265	2.11262e-14	1.75556e-13	603.088	204.437	0.667545	0.102633	7.8099e-11	6.1029e-10
FBgn0004838	Hrb27C	2L	6920704	6932057	+	8693	71011.1	8168.77	74272.1	8543.9	0.0646994	0.0868905	0.456509	0.576264	69944.3	8046.05	-0.0218811	0.0869035	0.801206	0.868257
FBgn0004839	otk	2R	12001473	12019846	-	4769	1.80668	0.378839	82.5409	17.3078	5.38448	0.699919	1.43725e-14	1.20618e-13	12.6703	2.65681	2.66021	0.734064	0.000290134	0.000983822
FBgn0004841	TkR86C	3R	10737592	10751228	-	3223	0	0	0	0	NA	NA	NA	NA	0	0	NA	NA	NA	NA
FBgn0004842	RYa-R	3R	26996980	27057935	+	2302	0	0	0	0	NA	NA	NA	NA	0	0	NA	NA	NA	NA
FBgn0004852	Ac76E	3L	19939287	19977960	+	5320	593.606	111.58	688.729	129.46	0.211258	0.0896414	0.0184382	0.0392353	526.978	99.056	-0.169961	0.0923536	0.0657205	0.127165
FBgn0004854	B-H2	X	17314581	17324175	+	3142	0	0	0	0	NA	NA	NA	NA	0	0	NA	NA	NA	NA
FBgn0004855	RpII15	3R	14309089	14310178	+	1035	174.616	168.711	242.11	233.923	0.479321	0.144425	0.000904015	0.00248244	252.713	244.167	0.534206	0.145879	0.000250264	0.000859781
FBgn0004856	Bx42	X	9103870	9106604	-	2403	1289.48	536.611	1289.48	536.611	-0.00242138	0.0773226	0.975018	0.984414	1202.66	500.482	-0.100758	0.0782023	0.197596	0.310871
FBgn0004858	elB	2L	14390628	14409549	-	3326	197.2	59.2904	222.729	66.9661	0.164828	0.13456	0.220598	0.327385	490.185	147.38	1.31139	0.130242	7.5823e-24	1.54635e-22
FBgn0004859	ci	4	47710	57041	-	5651	6.80999	1.20509	3.29125	0.582419	-1.06837	0.759951	0.15977	0.25229	7.57448	1.34038	0.168223	0.70349	0.811007	0.875168
FBgn0004860	ph-d	X	2115727	2123286	-	6126	404.674	66.0585	551.003	89.9451	0.437183	0.109307	6.34562e-05	0.00020864	501.088	81.7969	0.304104	0.110919	0.00611268	0.0157773
FBgn0004861	ph-p	X	2126210	2138371	-	6887	741.809	107.712	1008.33	146.411	0.436943	0.0860218	3.78553e-07	1.69109e-06	1028.34	149.317	0.468041	0.0866669	6.647e-08	3.78761e-07
FBgn0004862	bap	3R	21388880	21390449	+	1449	0	0	0	0	NA	NA	NA	NA	0	0	NA	NA	NA	NA
FBgn0004863	C15	3R	21499986	21512814	+	1856	0	0	0	0	NA	NA	NA	NA	0	0	NA	NA	NA	NA
FBgn0004864	hop	X	11360930	11368098	-	5055	773.008	152.919	910.123	180.044	0.233853	0.079579	0.00329674	0.00819188	861.604	170.446	0.154468	0.0807258	0.0556851	0.110238
FBgn0004865	Eip78C	3L	21226609	21266503	+	5878	16.9939	2.89111	17.6306	2.99941	0.0175254	0.426237	0.967203	0.979442	29.7759	5.06564	0.805398	0.41505	0.0523206	0.104473
FBgn0004867	RpS2	2L	9896265	9897552	-	1208	2293.97	1898.98	2937.74	2431.9	0.35682	0.0820989	1.38503e-05	5.00751e-05	3303.54	2734.72	0.526401	0.0821974	1.51244e-10	1.138e-09
FBgn0004868	Gdi	2L	9491176	9494876	-	2501	5513.45	2204.5	5797.61	2318.12	0.0718969	0.0651172	0.269544	0.385284	5584.89	2233.06	0.0186801	0.0653173	0.774886	0.849466
FBgn0004870	bab1	3L	1036369	1101089	-	5340	2.79711	0.523803	3.85615	0.722125	0.490997	0.914132	0.591186	0.696202	4.64186	0.869263	0.741561	0.916998	0.418697	0.553634
FBgn0004872	piwi	2L	10982205	10987420	-	3073	353.766	115.121	1745.75	568.093	2.29415	0.104891	4.82234e-106	6.6229e-104	1480.81	481.879	2.05637	0.105573	1.68112e-84	3.15035e-82
FBgn0004875	enc	3L	3818679	3842326	+	9058	2944.09	325.027	3864.89	426.682	0.391132	0.0773349	4.24492e-07	1.87815e-06	3483.88	384.619	0.242472	0.0776705	0.00179749	0.00523537
FBgn0004876	cdi	3R	19044882	19094270	-	6526	509.376	78.0533	459.421	70.3985	-0.151862	0.0980439	0.121402	0.200282	483.922	74.153	-0.0746882	0.0990666	0.450898	0.585381
FBgn0004878	cas	3R	5712975	5716805	-	3151	48.9306	15.5286	217.335	68.9733	2.13536	0.194045	3.63819e-28	6.93713e-27	147.922	46.9443	1.58211	0.199367	2.09368e-15	2.40676e-14
FBgn0004880	scrt	3L	3983896	3994003	+	9075	5.59421	0.616442	0.830638	0.0915304	-2.788	1.21542	0.0217982	0.0455364	1.4354	0.15817	-2.02325	1.13637	0.0750028	0.142189
FBgn0004882	orb	3R	23260610	23280856	-	9551	7.92655	0.829919	7.56503	0.792067	-0.0376902	0.611407	0.950846	0.967828	9.15043	0.95806	0.237664	0.61259	0.698041	0.790439
FBgn0004885	tok	3R	24719697	24749125	+	5411	5.58015	1.03126	2.23846	0.413686	-1.35707	0.909853	0.135822	0.220224	2.91186	0.538136	-0.90983	0.896678	0.310264	0.44326
FBgn0004888	Scsalpha1	3L	3814211	3818383	+	1479	2447.71	1654.98	2576.19	1741.85	0.0732422	0.0786927	0.35199	0.473748	2430.64	1643.43	-0.00893632	0.0791023	0.910053	0.941526
FBgn0004889	tws	3R	10126129	10139772	-	5059	2847.41	562.841	3888.46	768.623	0.447498	0.0634671	1.77821e-12	1.26999e-11	3419.03	675.832	0.262801	0.0639135	3.9255e-05	0.000154347
FBgn0004892	sob	2L	3578013	3580769	-	2611	0	0	0	0	NA	NA	NA	NA	0	0	NA	NA	NA	NA
FBgn0004893	bowl	2L	3771700	3784121	+	4280	58.1445	13.5852	59.0667	13.8006	-0.00701536	0.19373	0.971113	0.981698	422.837	98.7937	2.85148	0.171838	7.69821e-62	7.72309e-60
FBgn0004895	FoxL1	3L	4018878	4021279	+	1414	0	0	0	0	NA	NA	NA	NA	0	0	NA	NA	NA	NA
FBgn0004896	fd59A	2R	22868159	22870706	+	2228	2.30541	1.03474	4.72363	2.12012	0.92201	0.994361	0.353803	0.475307	4.65684	2.09014	0.987917	1.00546	0.325829	0.459808
FBgn0004897	fd96Ca	3R	25082684	25084878	+	2195	0	0	0	0	NA	NA	NA	NA	0	0	NA	NA	NA	NA
FBgn0004898	fd96Cb	3R	25095012	25096099	+	1088	0	0	0	0	NA	NA	NA	NA	0	0	NA	NA	NA	NA
FBgn0004901	Prat	3R	7909598	7911779	-	2105	362.938	172.417	436.598	207.41	0.263873	0.10178	0.00952588	0.0215568	423.663	201.265	0.223988	0.103443	0.0303632	0.065063
FBgn0004903	Rb97D	3R	26872129	26875742	-	3286	1199.51	365.036	1559.49	474.586	0.376446	0.0798205	2.40346e-06	9.64706e-06	1319.89	401.67	0.139148	0.0808249	0.0851423	0.157885
FBgn0004907	14-3-3zeta	2R	10099677	10109687	+	3637	13871.3	3813.95	17862.4	4911.31	0.364624	0.0642474	1.38436e-08	7.1345e-08	15495.8	4260.6	0.159745	0.0643481	0.0130458	0.030983
FBgn0004908	Arl2	3R	8341100	8341872	+	656	48.492	73.9207	35.2273	53.7002	-0.428149	0.303873	0.158842	0.25106	47.6387	72.62	-0.0182938	0.301934	0.951687	0.968432
FBgn0004910	Eip63F-1	3L	3909973	3935617	-	3545	1.83361	0.517239	0.729071	0.205662	-1.18278	1.71229	0.489717	0.607988	0.684856	0.193189	-1.36418	1.79628	0.447584	0.58224
FBgn0004911	asRNA:Eig63F-2	3L	3934718	3935992	+	1275	0	0	0	0	NA	NA	NA	NA	0	0	NA	NA	NA	NA
FBgn0004913	Gnf1	3R	4906622	4910081	+	3274	1416.13	432.537	2006.03	612.715	0.500606	0.0743663	1.67782e-11	1.10153e-10	1724.56	526.744	0.282636	0.0751671	0.000169847	0.000597563
FBgn0004914	Hnf4	2L	8687226	8709611	-	5377	1781.6	331.337	1642.3	305.431	-0.120485	0.0866886	0.16457	0.258564	1668.51	310.305	-0.0968444	0.0870898	0.266136	0.392758
FBgn0004915	TfIIB	2L	10431338	10433116	+	1604	549.946	342.859	575.694	358.911	0.0704212	0.0905806	0.436897	0.558771	548.007	341.65	-0.00257129	0.0921446	0.977738	0.985077
FBgn0004919	gol	2R	25072627	25084347	-	4156	40.7287	9.79998	1.78186	0.428745	-4.46361	0.664238	1.81854e-11	1.18931e-10	3.25139	0.782336	-3.62049	0.591463	9.28487e-10	6.48505e-09
FBgn0004921	Ggamma1	2R	8901404	8904791	+	2773	1802.11	649.879	2011.97	725.558	0.159	0.0780872	0.0417317	0.0803105	1897.69	684.347	0.0754111	0.0786188	0.337458	0.471331
FBgn0004924	Top1	X	15319479	15328029	+	6250	4944.64	791.142	5340.3	854.447	0.109951	0.065149	0.0914716	0.157724	5429.11	868.658	0.13416	0.0653117	0.0399615	0.0826699
FBgn0004926	eIF2beta	3L	12525093	12526731	-	1128	3357.11	2976.16	3337.62	2958.88	-0.00841737	0.0887302	0.924422	0.950709	4106.95	3640.92	0.291225	0.0887194	0.00102877	0.00314877
FBgn0004956	upd1	X	18305354	18309291	-	3125	953.397	305.087	1489.87	476.758	0.641456	0.0962904	2.70713e-11	1.74572e-10	881.171	281.975	-0.113388	0.0983813	0.249099	0.372598
FBgn0004957	por	X	18377521	18379854	-	2334	32.4987	13.924	51.7582	22.1757	0.65066	0.282827	0.0214169	0.0448228	47.6512	20.4161	0.534299	0.289243	0.0647131	0.125435
FBgn0004959	phm	X	18685766	18688433	+	2203	0.365555	0.165935	0	0	-1.52464	4.08046	0.708668	NA	0	0	-1.21951	4.08052	0.765046	NA
FBgn0005198	gig	3L	20129181	20139010	+	5795	725.641	125.218	706.337	121.887	-0.0375976	0.0865589	0.664028	0.756459	689.759	119.027	-0.0737687	0.0877415	0.400488	0.536315
FBgn0005278	Sam-S	2L	106903	114432	+	3559	2922.09	821.043	1956.73	549.797	-0.578337	0.0692154	6.50932e-17	6.3671e-16	2546.89	715.62	-0.198426	0.0690839	0.0040757	0.0109761
FBgn0005322	nmd	2L	10302173	10303947	-	1719	253.296	147.351	339.093	197.261	0.429707	0.126487	0.000680683	0.00191363	349.621	203.386	0.465227	0.127771	0.000271469	0.000927814
FBgn0005355	Su(fu)	3R	12689873	12691468	-	1596	245.866	154.051	213.295	133.643	-0.198095	0.134456	0.140668	0.22667	235.527	147.573	-0.05484	0.135562	0.685817	0.781766
FBgn0005386	ash1	3L	19590773	19598755	-	7615	584.809	76.7969	912.112	119.778	0.637584	0.0848855	5.86334e-14	4.7106e-13	846.44	111.154	0.530698	0.0860492	6.943e-10	4.91503e-09
FBgn0005390	fs(1)M3	X	5958207	5964247	-	5690	0	0	0	0	NA	NA	NA	NA	0	0	NA	NA	NA	NA
FBgn0005391	Yp2	X	10050951	10052636	-	1618	0.358524	0.221585	0.355025	0.219422	-0.562882	3.64773	0.877365	NA	0	0	-1.21951	3.64778	0.738141	NA
FBgn0005411	U2af50	X	16356696	16359039	-	1646	517.372	314.321	638.5	387.91	0.305259	0.107498	0.00451605	0.0109434	587.54	356.95	0.179277	0.108874	0.0996315	0.180244
FBgn0005427	ewg	X	268509	279718	-	6973	1316.48	188.796	1286.47	184.493	-0.0341167	0.072435	0.637643	0.735819	968.196	138.849	-0.44215	0.0743184	2.69125e-09	1.79392e-08
FBgn0005533	RpS17	3L	9428795	9429821	-	535	2593.1	4846.92	3440.8	6431.4	0.407842	0.0719915	1.46899e-08	7.54772e-08	4073.06	7613.2	0.650653	0.0720255	1.66058e-19	2.57299e-18
FBgn0005536	Mbs	3L	16051959	16082026	+	8262	1975.21	239.072	2893.24	350.186	0.547603	0.0750997	3.06114e-13	2.32862e-12	2571.91	311.294	0.379028	0.0755866	5.31729e-07	2.69859e-06
FBgn0005558	ey	4	697689	721173	+	3720	8.63657	2.32166	9.49878	2.55344	0.18358	0.488923	0.707305	0.792802	40.1888	10.8034	2.25479	0.444488	3.92043e-07	2.01959e-06
FBgn0005561	sv	4	1088798	1113317	+	5213	0.358524	0.068775	0.475613	0.091236	0.220408	2.66729	0.934143	NA	0.32456	0.0622597	-0.257723	2.71906	0.924486	NA
FBgn0005564	Shal	3L	19566851	19584568	-	4606	7.41376	1.60959	6.54816	1.42166	-0.190001	0.693005	0.783955	0.851301	8.95917	1.94511	0.302247	0.684993	0.659039	0.762585
FBgn0005585	Calr	3R	9628691	9630851	-	1677	12400.4	7394.39	15161.5	9040.84	0.289979	0.0741452	9.19279e-05	0.000296121	13781.4	8217.89	0.152401	0.0742316	0.0400682	0.0828388
FBgn0005586	Rab3	2R	10721335	10729203	-	3757	10.6616	2.83779	10.5829	2.81684	-0.00946503	0.533199	0.985837	0.991103	9.43925	2.51244	-0.185415	0.552439	0.73715	0.821426
FBgn0005590	scw	2L	19699379	19700968	-	1590	0.365555	0.229909	0	0	-1.52464	4.08046	0.708668	NA	0	0	-1.21951	4.08052	0.765046	NA
FBgn0005593	RpL7	2L	10201004	10202321	+	1167	7536.41	6457.93	9712.01	8322.2	0.365247	0.0605595	1.62732e-09	9.04237e-09	10592.5	9076.7	0.490484	0.060616	5.88575e-16	7.08573e-15
FBgn0005596	yem	3R	29118330	29122879	-	4239	228.79	53.9727	295.611	69.7359	0.368894	0.117937	0.00176061	0.00461044	268.285	63.2897	0.227143	0.120796	0.0600547	0.117646
FBgn0005612	Sox14	2R	23978801	23985177	+	3579	3314.02	925.961	1809.9	505.701	-0.875064	0.0971522	2.11488e-19	2.42865e-18	1400.15	391.213	-1.24253	0.0980821	8.86533e-37	3.43947e-35
FBgn0005613	Sox15	2R	14201390	14212413	-	3651	0.724079	0.198324	0.729071	0.199691	0.00133594	2.16113	0.999507	1	0.309586	0.084795	-1.06995	2.3039	0.642354	NA
FBgn0005614	trpl	2R	9753697	9765518	+	3893	0.365555	0.0939007	0	0	-1.52464	4.08046	0.708668	NA	0	0	-1.21951	4.08052	0.765046	NA
FBgn0005616	msl-2	2L	3462218	3466112	-	3843	427.361	111.205	434.615	113.093	0.0183341	0.109716	0.867288	0.912259	441.416	114.862	0.0436749	0.110931	0.693794	0.787156
FBgn0005617	msl-1	2L	18683720	18688800	-	5021	2512.35	500.369	4219.72	840.415	0.747285	0.0574598	1.14093e-38	3.2755e-37	3794.68	755.762	0.594009	0.057879	1.03499e-24	2.2202e-23
FBgn0005619	Hdc	2R	10237988	10246077	+	3826	0.85022	0.222222	0.355025	0.0927927	-1.5146	2.7907	0.587314	NA	0	0	-2.17123	2.79072	0.436558	NA
FBgn0005624	Psc	2R	12965997	12980994	-	6332	1387.86	219.183	1211.79	191.375	-0.199023	0.0927351	0.0318616	0.0633678	1168.9	184.601	-0.250111	0.0934067	0.00741388	0.0187748
FBgn0005626	ple	3L	6713356	6719525	-	3806	5.68639	1.49406	0	0	-5.26948	1.4706	0.000339396	0.000999791	2.9983	0.787783	-0.94463	1.00387	0.346713	0.480986
FBgn0005631	robo1	2R	22692524	22700970	-	6791	2266.6	333.765	1795.61	264.41	-0.338017	0.0676641	5.86775e-07	2.5583e-06	1897.45	279.406	-0.256634	0.0680268	0.000161595	0.000572586
FBgn0005632	faf	3R	31777020	31790681	+	10488	4245.48	404.794	4084.04	389.401	-0.0565393	0.065569	0.38853	0.510621	3838.02	365.944	-0.146314	0.0658859	0.0263702	0.0575751
FBgn0005633	fln	3L	19989551	19991220	-	1300	1.0826	0.832772	0.444311	0.341778	-1.19501	2.17965	0.583513	0.689965	0.64912	0.499323	-0.769334	2.16539	0.722375	0.808865
FBgn0005636	nvy	2R	24275734	24291084	+	3502	9.60006	2.74131	8.78966	2.5099	-0.145773	0.531074	0.783711	0.851219	20.3854	5.82107	1.08471	0.501137	0.0304259	0.0651796
FBgn0005638	slbo	2R	24331522	24334307	-	2786	8.73578	3.1356	9.37146	3.36377	0.0572505	0.551906	0.917382	0.946341	14.1318	5.07244	0.690418	0.540286	0.201293	0.315189
FBgn0005640	Eip63E	3L	3515751	3610521	+	6544	523.689	80.0259	598.567	91.468	0.19071	0.089215	0.0325457	0.0645388	584.223	89.2761	0.158126	0.0905626	0.0808038	0.151138
FBgn0005642	wdn	3R	28807983	28811337	-	3184	189.506	59.5181	284.917	89.4839	0.581678	0.122305	1.97509e-06	8.0163e-06	310.866	97.6339	0.708821	0.123321	9.04165e-09	5.69085e-08
FBgn0005648	Pabp2	2R	8131431	8134374	+	2138	5632.68	2634.56	10075.6	4712.63	0.83868	0.0733156	2.65997e-30	5.66734e-29	8863.57	4145.73	0.654057	0.0734644	5.43323e-19	8.10253e-18
FBgn0005649	Rox8	3R	24043056	24048265	-	4010	4023.35	1003.33	3608.29	899.823	-0.157948	0.0782533	0.0435469	0.0832832	3229.84	805.446	-0.317355	0.0786186	5.42205e-05	0.000209086
FBgn0005654	Orc3	2R	13202728	13206547	-	3315	0	0	0	0	NA	NA	NA	NA	0	0	NA	NA	NA	NA
FBgn0005655	PCNA	2R	20261754	20262883	-	1070	878.562	821.086	920.474	860.256	0.0678429	0.0877027	0.439194	0.560956	862	805.608	-0.0258623	0.0887751	0.770804	0.846767
FBgn0005658	Ets65A	3L	6097617	6123913	+	4922	0	0	0.830638	0.16876	1.89083	2.30835	0.412715	0.535002	0.634146	0.128839	1.55109	2.38998	0.516342	NA
FBgn0005659	Ets98B	3R	27736538	27748366	+	3522	0.724079	0.205588	0	0	-2.30055	3.58223	0.520736	NA	0	0	-1.99541	3.58227	0.577511	NA
FBgn0005660	Ets21C	2L	544925	552923	-	5407	250.417	46.3135	61.4668	11.368	-2.03502	0.166306	1.98136e-34	4.92337e-33	88.4418	16.3569	-1.50764	0.162355	1.60064e-20	2.65845e-19
FBgn0005664	Crys	2L	11944129	11947131	+	2261	0	0	0	0	NA	NA	NA	NA	0	0	NA	NA	NA	NA
FBgn0005666	bt	4	724400	776474	+	28019	20.7123	0.739225	4.92796	0.175879	-2.00192	0.497853	5.79247e-05	0.000192005	27.5807	0.984358	0.405528	0.406793	0.318817	0.452292
FBgn0005670	Cyp4d1	X	2159145	2162180	-	2285	0	0	0.253458	0.110922	0.398902	4.08046	0.922124	NA	0	0	0	4.08052	1	NA
FBgn0005671	Vha55	3R	12623762	12627829	-	2786	4035.79	1448.6	2781.66	998.441	-0.53679	0.0583101	3.39196e-20	4.13835e-19	3722.97	1336.31	-0.11583	0.0581536	0.0463927	0.0940928
FBgn0005672	spi	2L	19567900	19577315	-	1817	1941.84	1068.71	2859.18	1573.57	0.558388	0.0705327	2.43852e-15	2.14941e-14	1908.92	1050.59	-0.0233737	0.0716956	0.744414	0.826831
FBgn0005674	GluProRS	3R	23952136	23958391	-	5453	1708.72	313.354	1457.48	267.28	-0.229186	0.0714557	0.00133947	0.00357392	1734.97	318.168	0.0214954	0.0715297	0.763788	0.84148
FBgn0005677	dac	2L	16466512	16485998	-	4982	8.82093	1.77056	248.607	49.9011	4.77172	0.337827	2.67318e-45	9.98808e-44	331.701	66.58	5.18657	0.337545	2.78596e-53	1.96243e-51
FBgn0005683	pie	2L	10420625	10422780	-	2089	184.666	88.3994	146.99	70.3637	-0.318326	0.146078	0.0293207	0.0590072	172.564	82.6062	-0.0974291	0.146811	0.506924	0.636185
FBgn0005694	Aef1	3L	21433422	21438639	+	4007	1255.03	313.209	1707.74	426.189	0.443066	0.0760368	5.64329e-09	2.99492e-08	1845.78	460.639	0.557089	0.0763185	2.88763e-13	2.78988e-12
FBgn0005695	gcl	2R	8724258	8728999	+	2509	176.681	70.419	136.417	54.3711	-0.386439	0.150438	0.0102062	0.0229482	140.863	56.1432	-0.331404	0.152982	0.030289	0.0649386
FBgn0005696	DNApol-alpha73	3R	27239163	27241228	+	2066	93.3316	45.175	105.681	51.1526	0.172809	0.191411	0.366624	0.488401	91.6661	44.3689	-0.0305934	0.197174	0.876695	0.919271
FBgn0005771	noc	2L	14490859	14494019	+	2859	1292.23	451.988	3769.62	1318.51	1.54162	0.0830312	5.96573e-77	4.85037e-75	2828.57	989.357	1.12838	0.0836	1.61971e-41	7.51729e-40
FBgn0005775	Con	3L	4936758	5079033	-	5947	35.9066	6.03777	72.7932	12.2403	1.0148	0.228415	8.881e-06	3.29889e-05	129.105	21.7093	1.83994	0.223185	1.66516e-16	2.09347e-15
FBgn0005777	PpD3	3R	9747875	9751094	+	2509	1121.12	446.839	1307.05	520.944	0.218114	0.0755287	0.00387913	0.00952952	1213.28	483.572	0.110655	0.0764401	0.14773	0.247846
FBgn0005778	PpD5	2R	22041667	22042945	-	1279	0	0	0	0	NA	NA	NA	NA	0	0	NA	NA	NA	NA
FBgn0005779	PpD6	2L	3109672	3110998	+	1327	0	0	0	0	NA	NA	NA	NA	0	0	NA	NA	NA	NA
FBgn0008635	betaCOP	X	18381549	18385242	-	3203	2238.19	698.779	1876.2	585.763	-0.255397	0.073373	0.000499902	0.00143557	1899.37	592.997	-0.237682	0.0737987	0.00127888	0.00384323
FBgn0008636	hbn	2R	20954668	20960909	-	1798	0	0	0	0	0	4.08046	1	NA	0.309586	0.172184	0.704067	4.08052	0.86301	NA
FBgn0008646	E5	3R	13867345	13874916	-	2122	0	0	0	0	NA	NA	NA	NA	0	0	NA	NA	NA	NA
FBgn0008651	lbl	3R	21409979	21434133	-	2744	0	0	0	0	NA	NA	NA	NA	0	0	NA	NA	NA	NA
FBgn0010014	CanB	X	5332499	5334449	+	1234	4.61666	3.74121	1.39554	1.13091	-1.59132	1.14106	0.163136	0.256728	1.38469	1.12211	-1.7386	1.20018	0.147445	0.247494
FBgn0010015	CanA1	3R	31039374	31046821	+	3064	12.6436	4.12651	45.6151	14.8874	1.84901	0.382445	1.33335e-06	5.5468e-06	34.9876	11.4189	1.47585	0.391907	0.000166011	0.000585968
FBgn0010019	Cyp4g1	X	467057	469335	-	2279	5.22163	2.29119	13.5847	5.96084	1.39983	0.609836	0.0217094	0.0453882	12.0285	5.27796	1.23219	0.622653	0.047823	0.0966386
FBgn0010038	GstD2	3R	12371971	12372704	+	734	21.857	29.778	4.35078	5.9275	-2.23867	0.567191	7.91559e-05	0.000257428	9.14078	12.4534	-1.23991	0.525019	0.0181936	0.041607
FBgn0010039	GstD3	3R	12373068	12373813	+	746	1183.94	1587.05	2524.83	3384.49	1.09589	0.0800968	1.30033e-42	4.41981e-41	1590.23	2131.68	0.428102	0.0814129	1.45311e-07	7.94294e-07
FBgn0010040	GstD4	3R	12374100	12374824	+	725	6.9291	9.55738	6.41067	8.8423	-0.0937892	0.681101	0.890476	0.927815	4.00193	5.5199	-0.769917	0.741251	0.298957	0.430065
FBgn0010041	GstD5	3R	12375733	12376572	+	840	25.272	30.0857	33.5437	39.933	0.408121	0.319123	0.200937	0.304431	41.8396	49.8091	0.744818	0.318467	0.0193477	0.0440132
FBgn0010042	GstD6	3R	12377128	12377907	+	780	18.2238	23.3638	21.7168	27.842	0.277381	0.423866	0.512849	0.629099	14.7621	18.9258	-0.292473	0.448119	0.513969	0.641702
FBgn0010043	GstD7	3R	12378500	12379255	+	756	9.02322	11.9355	14.3908	19.0355	0.722878	0.560111	0.196843	0.300243	7.73001	10.2249	-0.202027	0.604455	0.738206	0.82205
FBgn0010044	GstD8	3R	12380008	12380815	+	808	0.85022	1.05225	0.830638	1.02802	-0.00281657	1.81364	0.998761	1	1.45037	1.79501	0.78325	1.75856	0.656036	0.760564
FBgn0010051	Itpr	3R	5517117	5539411	+	10331	556.278	53.8455	555.085	53.7301	-0.00473723	0.100386	0.962362	0.976194	510.217	49.387	-0.12916	0.102082	0.205782	0.320952
FBgn0010052	Jhe	2R	16119793	16122773	+	2101	0.358524	0.170645	0	0	-1.52464	3.73461	0.683092	NA	0.309586	0.147352	-0.257722	3.73466	0.944983	NA
FBgn0010053	Jheh1	2R	18853434	18855087	-	1486	64.4662	43.3824	293.434	197.466	2.19576	0.157608	4.06322e-44	1.45917e-42	334.646	225.199	2.38537	0.158074	1.87833e-51	1.26909e-49
FBgn0010078	RpL23	2R	22854383	22855694	+	542	6506.27	12004.2	9513.78	17553.1	0.548772	0.0680211	7.16537e-16	6.48456e-15	11475.9	21173.3	0.81893	0.068025	2.22517e-33	7.39144e-32
FBgn0010097	gammaTub37C	2L	19183863	19185726	-	1628	499.3	306.695	280.36	172.211	-0.833988	0.114214	2.83598e-13	2.16707e-12	340.819	209.348	-0.556232	0.114328	1.14326e-06	5.53893e-06
FBgn0010100	mAcon1	2L	21168570	21173185	+	3103	6084.39	1960.81	3393.77	1093.71	-0.842645	0.0590459	3.3166e-46	1.26717e-44	3672.93	1183.67	-0.72826	0.0592265	9.49506e-35	3.40451e-33
FBgn0010105	comm	3L	15721511	15728430	-	2495	0	0	0.355025	0.142295	0.398908	3.61685	0.912178	NA	0.37527	0.150409	0.704068	3.61689	0.845658	NA
FBgn0010109	dpn	2R	8228971	8232330	-	2036	20.5991	10.1174	13.6474	6.70302	-0.585654	0.428231	0.171433	0.267398	13.6759	6.71704	-0.590621	0.439512	0.17901	0.287643
FBgn0010113	hdc	3R	30277932	30372382	+	15063	13493.1	895.776	15076.5	1000.9	0.159621	0.0639257	0.0125259	0.0276441	13441.8	892.374	-0.00570721	0.0640342	0.928981	0.952302
FBgn0010114	hig	2R	9227785	9247249	-	4332	7.30288	1.6858	0.932206	0.215191	-3.1486	1.15402	0.00636493	0.0149496	2.94759	0.680423	-1.31064	0.945177	0.165546	0.27083
FBgn0010173	RpA-70	3R	8262120	8264451	-	2135	1508.56	706.584	1309.66	613.424	-0.203393	0.0701011	0.00371478	0.00914789	1335.82	625.678	-0.175511	0.0707187	0.0130711	0.0310358
FBgn0010194	Wnt5	X	18501401	18505405	-	4005	1388.4	346.667	1007.2	251.487	-0.462937	0.08774	1.31862e-07	6.18418e-07	983.009	245.445	-0.498624	0.0885516	1.79289e-08	1.09245e-07
FBgn0010197	Gyc32E	2L	11138759	11149101	-	3845	0	0	0	0	NA	NA	NA	NA	0	0	NA	NA	NA	NA
FBgn0010198	RpS15Aa	X	13335637	13337705	-	944	1235.7	1309	1424.43	1508.93	0.204454	0.0689805	0.00303726	0.00758606	1592.96	1687.46	0.366699	0.0692498	1.18818e-07	6.55611e-07
FBgn0010213	Sod2	2R	16772785	16773915	-	1015	1117.71	1101.19	1150.95	1133.94	0.0440312	0.0834786	0.597878	0.701554	1292.6	1273.5	0.211757	0.0837386	0.0114457	0.027592
FBgn0010215	alpha-Cat	3L	23318646	23338100	-	3487	2094.74	600.728	2704.81	775.685	0.36789	0.0651183	1.6085e-08	8.24367e-08	2327.09	667.362	0.150335	0.0657949	0.0223181	0.0498009
FBgn0010217	ATPsynbeta	4	1031484	1034917	+	2386	4742.84	1987.78	3615.87	1515.45	-0.390167	0.0685448	1.25452e-08	6.47847e-08	3803.92	1594.27	-0.318017	0.0687284	3.7071e-06	1.69907e-05
FBgn0010220	Dbp45A	2R	9087834	9089802	+	1670	589.344	352.9	813.646	487.213	0.464189	0.0865569	8.19341e-08	3.92781e-07	735.494	440.415	0.316897	0.087983	0.000316025	0.00106219
FBgn0010222	Nmdmc	3R	9042508	9050555	-	1516	127.271	83.9516	133.98	88.3774	0.0785709	0.16173	0.627098	0.726435	131.263	86.5849	0.0411799	0.165114	0.803049	0.869769
FBgn0010223	Galphaf	3L	16662557	16667934	-	1825	76.5524	41.9465	18.2808	10.0169	-2.05344	0.337925	1.22749e-09	6.89604e-09	26.721	14.6417	-1.49896	0.330524	5.75782e-06	2.56673e-05
FBgn0010225	Gel	3R	4235217	4241057	+	3376	517	153.14	634.641	187.986	0.296962	0.0882608	0.000766556	0.0021338	436.569	129.315	-0.242878	0.0921471	0.00839489	0.0209335
FBgn0010226	GstS1	2R	17093246	17099501	-	2275	303.401	133.363	415.367	182.579	0.459346	0.114373	5.91389e-05	0.000195775	334.42	146.998	0.149724	0.117444	0.202362	0.316559
FBgn0010228	HmgZ	2R	21697488	21707861	-	1604	4319.13	2692.73	10545.5	6574.52	1.28763	0.0809088	5.02042e-57	2.60319e-55	11945	7447.02	1.46783	0.0809335	1.64988e-73	2.27592e-71
FBgn0010235	Klc	3L	12746616	12750056	-	2065	1919.05	929.321	1337.34	647.621	-0.519499	0.080063	8.66229e-11	5.36144e-10	1256.73	608.588	-0.610973	0.0808621	4.16469e-14	4.32674e-13
FBgn0010238	Lac	2R	12453190	12465630	+	2156	2650.37	1229.3	2236.29	1037.24	-0.246859	0.0792356	0.0018363	0.00479135	2629.15	1219.46	-0.0113044	0.0792926	0.886633	0.926074
FBgn0010240	Lcch3	X	15925105	15928529	+	1903	0.365555	0.192094	0	0	-1.52465	3.6901	0.679481	NA	0.32456	0.170552	-0.257722	3.69015	0.944321	NA
FBgn0010241	Mdr50	2R	14246966	14252597	+	4256	1.70044	0.39954	0.919924	0.216148	-0.741234	1.58231	0.639462	0.737136	1.39966	0.328867	-0.264776	1.56169	0.865368	0.911919
FBgn0010246	Myo61F	3L	1318480	1329617	+	3955	995.11	251.608	521.208	131.785	-0.929069	0.0865682	7.18513e-27	1.26996e-25	475.24	120.162	-1.06695	0.0887411	2.6825e-33	8.82205e-32
FBgn0010247	Parp	3R	3461351	3587054	-	3112	141.036	45.3201	186.002	59.7693	0.417137	0.167455	0.0127368	0.0280729	138.987	44.6616	-0.00566725	0.173216	0.9739	0.982905
FBgn0010258	Rbp4	3R	13654556	13656394	-	1515	5.91878	3.90678	10.8394	7.1547	0.823307	0.5896	0.162599	0.256042	17.9763	11.8655	1.52881	0.578781	0.00825566	0.0206329
FBgn0010263	Rbp9	2L	2954762	2968434	+	8054	8.46944	1.05158	3.29125	0.408648	-1.40988	0.732211	0.0541655	0.100821	5.42235	0.673249	-0.673326	0.701052	0.336828	0.470915
FBgn0010265	RpS13	2L	8363477	8364662	-	899	11799.5	13125.2	15341.7	17065.3	0.379002	0.0737632	2.77541e-07	1.25754e-06	16691.2	18566.4	0.500279	0.0737932	1.20608e-11	1.01429e-10
FBgn0010269	Dsor1	X	9247342	9250037	+	1799	289.023	160.657	287.753	159.951	-0.000395029	0.116251	0.997289	0.999945	277.543	154.276	-0.0552783	0.118566	0.641055	0.750467
FBgn0010278	Ssrp	2R	23806361	23809004	-	2507	5022.09	2003.23	7220.79	2880.25	0.5242	0.0832972	3.11126e-10	1.85236e-09	7278.52	2903.28	0.535601	0.083396	1.34164e-10	1.0203e-09
FBgn0010280	Taf4	3L	16113212	16121651	+	5516	1738.65	315.202	3517.79	637.743	1.01371	0.0828841	2.13734e-34	5.298e-33	3403.53	617.029	0.967189	0.0831375	2.78083e-31	8.36947e-30
FBgn0010282	TfIIFalpha	3R	6380467	6382604	+	1938	2855.63	1473.49	3096.48	1597.77	0.116184	0.0800085	0.146463	0.234406	3136.34	1618.34	0.134827	0.0802427	0.0929115	0.169788
FBgn0010287	Trf	2L	8072895	8073948	+	983	14.296	14.5433	34.7238	35.3243	1.25628	0.36053	0.000492967	0.00141686	33.2055	33.7797	1.19298	0.366926	0.00114881	0.00347971
FBgn0010288	Uch	2L	2212738	2214211	-	1196	1974.93	1651.28	1321.61	1105.03	-0.575427	0.0755599	2.62643e-14	2.16835e-13	1444.73	1207.97	-0.449937	0.0759017	3.06858e-09	2.03045e-08
FBgn0010292	bys	X	7901880	7903643	+	1518	121.498	80.0379	247.535	163.067	1.03485	0.14997	5.18474e-12	3.54355e-11	226.964	149.515	0.904925	0.152561	3.00092e-09	1.99099e-08
FBgn0010294	ng2	X	3240026	3240571	-	546	0	0	0	0	0	4.08046	1	NA	0.37527	0.687307	0.704067	4.08052	0.86301	NA
FBgn0010295	ng3	X	3241491	3242084	-	594	0	0	0	0	0	4.08046	1	NA	0.32456	0.546397	0.704067	4.08052	0.86301	NA
FBgn0010296	ng4	X	3243954	3244220	-	267	0	0	0	0	NA	NA	NA	NA	0	0	NA	NA	NA	NA
FBgn0010300	brat	2L	19133816	19179758	+	12788	3544.1	277.142	4681.16	366.059	0.399699	0.0875573	4.99503e-06	1.92509e-05	4179.04	326.794	0.237026	0.087811	0.00694915	0.0177199
FBgn0010303	hep	X	13079205	13090434	-	6215	2780.67	447.413	1556.43	250.431	-0.84092	0.080893	2.60034e-25	4.24193e-24	1710.71	275.255	-0.70195	0.0811388	5.0949e-18	7.20371e-17
FBgn0010309	pigeon	2L	19186043	19189938	+	3334	110.125	33.0309	125.463	37.6313	0.180914	0.167033	0.278761	0.395274	120.276	36.0756	0.120551	0.170817	0.480355	0.612048
FBgn0010313	corto	3R	5077779	5087072	-	9294	1494.73	160.828	1467.83	157.933	-0.0282304	0.183207	0.877539	0.918006	1938.4	208.564	0.3739	0.183121	0.0411697	0.0847808
FBgn0010314	Cks30A	2L	9330763	9331981	+	1147	1265.73	1103.51	1833.17	1598.23	0.531414	0.0766806	4.20179e-12	2.89511e-11	1598.35	1393.51	0.335613	0.0774874	1.48305e-05	6.19152e-05
FBgn0010315	CycD	X	15906822	15909676	-	2453	721.88	294.285	719.364	293.259	-0.00614701	0.0869969	0.94367	0.963338	664.789	271.01	-0.11794	0.0884569	0.182433	0.29201
FBgn0010316	dap	2R	9712321	9716256	+	2530	551.936	218.157	1015	401.184	0.878756	0.0973136	1.71437e-19	1.98667e-18	834.528	329.853	0.593523	0.0987156	1.82738e-09	1.23719e-08
FBgn0010317	CycJ	3L	3466428	3468098	+	1478	5.57312	3.77072	1.18566	0.802208	-2.3441	1.03024	0.0228881	0.0475495	4.93069	3.33605	-0.164166	0.831275	0.843447	0.897292
FBgn0010323	Gsc	2L	583540	594685	-	2584	0	0	0	0	NA	NA	NA	NA	0	0	NA	NA	NA	NA
FBgn0010328	woc	3R	27256595	27264055	-	6332	3124.41	493.431	5199.25	821.107	0.734616	0.073399	1.3982e-23	2.09277e-22	4353.69	687.569	0.478054	0.0737401	8.99432e-11	6.97358e-10
FBgn0010329	Tbh	X	7995697	8027394	+	3868	5.58015	1.44264	6.88628	1.78032	0.310011	0.747454	0.678321	0.769051	5.3156	1.37425	-0.105872	0.781845	0.892285	0.929339
FBgn0010333	Rac1	3L	1300879	1302683	-	1805	1513.28	838.382	1689.11	935.794	0.155488	0.068385	0.0229834	0.0477182	1558.08	863.203	0.0407516	0.0691805	0.55582	0.677516
FBgn0010339	128up	2R	12037298	12038851	+	1304	178.686	137.029	324.376	248.755	0.865311	0.122666	1.73611e-12	1.24167e-11	296.631	227.478	0.732506	0.125107	4.76852e-09	3.1036e-08
FBgn0010340	140up	3R	14124163	14125548	-	1200	130.999	109.166	164.768	137.307	0.345167	0.156932	0.0278442	0.0564832	128.182	106.819	-0.0256529	0.163232	0.875122	0.918106
FBgn0010341	Cdc42	X	19697091	19699938	+	2078	3836.98	1846.48	2479.8	1193.36	-0.628631	0.068431	4.06382e-20	4.93436e-19	2523.14	1214.22	-0.60453	0.0687666	1.48182e-18	2.16115e-17
FBgn0010342	Map60	2R	9590867	9592744	+	1814	1426.96	786.638	1844.2	1016.65	0.367286	0.0743767	7.88502e-07	3.36703e-06	1690.13	931.714	0.243727	0.0750623	0.0011663	0.00352732
FBgn0010348	Arf79F	3L	22868380	22872231	-	2442	12972.2	5312.12	14256.8	5838.17	0.135925	0.0739329	0.0659906	0.119377	12601.2	5160.19	-0.0420627	0.0740354	0.569938	0.689563
FBgn0010350	Cds	3L	8127762	8131675	+	2609	313.979	120.344	223.005	85.4751	-0.500412	0.125773	6.92925e-05	0.000227095	229.852	88.0998	-0.454785	0.127688	0.000368469	0.00122765
FBgn0010352	Nc73EF	3L	16954822	16968724	+	5338	2416.62	452.72	2427.08	454.679	0.00608943	0.0697282	0.930408	0.955029	2418.13	453.003	0.000565938	0.0701068	0.993559	0.995677
FBgn0010355	Taf1	3R	6646889	6656048	+	6876	895.305	130.207	1071.39	155.816	0.256908	0.0893288	0.0040278	0.00985899	1017.03	147.91	0.179856	0.0901859	0.0461218	0.0935815
FBgn0010356	Taf5	2R	10877312	10879673	-	2362	124.659	52.7771	153.554	65.01	0.315954	0.163818	0.0537695	0.100231	136.604	57.8342	0.140585	0.168105	0.402991	0.53884
FBgn0010357	betaTry	2R	11346325	11347395	+	1071	0	0	0	0	NA	NA	NA	NA	0	0	NA	NA	NA	NA
FBgn0010358	deltaTry	2R	11355319	11356128	+	810	0	0	0	0	NA	NA	NA	NA	0	0	NA	NA	NA	NA
FBgn0010359	gammaTry	2R	11349061	11349870	-	810	0	0	0	0	NA	NA	NA	NA	0	0	NA	NA	NA	NA
FBgn0010379	Akt1	3R	16099228	16105670	+	4889	1646.46	336.768	1855.59	379.545	0.168846	0.0798539	0.0344784	0.068	1811.49	370.523	0.136653	0.0803312	0.0889194	0.163849
FBgn0010380	AP-1-2beta	X	19731004	19734581	+	3228	1265.53	392.047	1057.71	327.668	-0.258121	0.0738274	0.000471805	0.00136104	1058.19	327.815	-0.256503	0.0746357	0.000588783	0.00188882
FBgn0010382	CycE	2L	15727581	15748150	-	5047	877.691	173.903	748.976	148.4	-0.229884	0.0795015	0.00383324	0.00941906	837.592	165.958	-0.0673718	0.0799556	0.399443	0.535539
FBgn0010383	Cyp18a1	X	18688538	18693042	-	3049	666.493	218.594	811.492	266.15	0.287267	0.0834578	0.000577292	0.0016425	666.041	218.446	-0.000375087	0.0855105	0.9965	0.997706
FBgn0010385	Def	2R	10054178	10054576	-	399	0	0	0	0	NA	NA	NA	NA	0	0	NA	NA	NA	NA
FBgn0010387	Acbp2	3L	7131863	7133463	+	432	12.1379	28.0969	1.21697	2.81705	-3.46452	0.970404	0.000356733	0.00104662	1.36971	3.17063	-3.1801	0.976203	0.00112349	0.00340719
FBgn0010388	Dro	2R	14745961	14746714	+	754	5.70629	7.56803	11.6243	15.4169	1.04367	0.537923	0.0523585	0.097888	36.6635	48.6254	2.71109	0.509384	1.02473e-07	5.69215e-07
FBgn0010389	htl	3R	18045216	18052984	-	4094	10.7819	2.63358	0.355025	0.0867184	-5.21915	1.40378	0.000200861	0.000611253	0	0	-5.87578	1.40378	2.84316e-05	0.000113864
FBgn0010391	SrpRalpha	X	11126877	11129087	-	2056	408.826	198.845	344.05	167.34	-0.24398	0.12313	0.0475379	0.0899257	383.059	186.313	-0.0958912	0.123834	0.438721	0.574209
FBgn0010395	Itgbn	2L	21053033	21058044	+	3340	777.269	232.715	17.6343	5.27972	-5.50565	0.212833	1.51022e-147	4.1482e-145	16.2931	4.87819	-5.57087	0.235127	4.25001e-124	1.50754e-121
FBgn0010397	LamC	2R	14570810	14575771	-	2450	312.539	127.567	131.009	53.4731	-1.26919	0.142283	4.65602e-19	5.21136e-18	181.481	74.0741	-0.788271	0.140473	2.00541e-08	1.21375e-07
FBgn0010398	Lrr47	2L	10517335	10519269	+	1874	57.8699	30.8804	66.4697	35.4694	0.189185	0.221774	0.39363	0.515789	66.903	35.7007	0.202139	0.225983	0.371059	0.505623
FBgn0010399	Nmdar1	3R	5508842	5523328	-	4170	0.365555	0.0876631	0.253458	0.0607812	-0.562881	3.84239	0.883533	NA	0	0	-1.21951	3.84245	0.750956	NA
FBgn0010401	Os-C	3R	7978959	7979614	+	604	8.48934	14.0552	6.67641	11.0537	-0.359715	0.672583	0.59277	0.697583	3.79376	6.28106	-1.17644	0.743785	0.11372	0.200831
FBgn0010403	Obp83b	3R	5976177	5976817	-	528	0	0	0	0	NA	NA	NA	NA	0	0	NA	NA	NA	NA
FBgn0010406	RNaseX25	3L	7970588	7972449	+	1663	1727.65	1038.88	991.626	596.287	-0.801846	0.103429	9.00319e-15	7.66327e-14	939.912	565.191	-0.877747	0.104224	3.71009e-17	4.89358e-16
FBgn0010407	Ror	2L	10251843	10254686	+	2271	98.424	43.3395	90.961	40.0533	-0.107319	0.196768	0.585471	0.691625	75.2199	33.1219	-0.371842	0.204192	0.0686	0.131899
FBgn0010408	RpS9	3L	9509793	9511531	-	1018	5417.89	5322.09	6426.13	6312.51	0.246081	0.0685312	0.000329675	0.000972848	6759.94	6640.41	0.318894	0.0686336	3.37903e-06	1.55517e-05
FBgn0010409	RpL18A	2R	17546406	17547462	-	635	11377	17916.5	13521.9	21294.4	0.249285	0.0558674	8.11693e-06	3.03504e-05	15913	25059.9	0.484165	0.0558802	4.5413e-18	6.45267e-17
FBgn0010411	RpS18	2R	20263979	20264848	+	612	9879.66	16143.2	7289.59	11911.1	-0.43807	0.0653887	2.09152e-11	1.35822e-10	8677.37	14178.7	-0.186906	0.0654021	0.00426593	0.0114419
FBgn0010412	RpS19a	X	16637894	16639249	+	1254	19431.5	15495.6	18900.4	15072.1	-0.039998	0.068437	0.558917	0.669267	22988.4	18332	0.242612	0.0684369	0.000392539	0.00130087
FBgn0010414	SerT	2R	24404595	24411074	-	3725	1.21578	0.326383	0	0	-3.01429	2.70046	0.264331	NA	0	0	-2.70914	2.70048	0.315761	NA
FBgn0010415	Sdc	2R	21392402	21481176	-	4202	2513.24	598.105	3076.45	732.14	0.289591	0.071244	4.80785e-05	0.000161528	2688.08	639.714	0.0956049	0.0717583	0.182756	0.292395
FBgn0010416	TH1	X	16388820	16391438	-	2297	614.966	267.726	838.09	364.863	0.447291	0.0868128	2.57221e-07	1.17121e-06	907.478	395.071	0.559272	0.0873289	1.51159e-10	1.138e-09
FBgn0010417	Taf6	3L	19599088	19601382	+	2056	382.539	186.06	406.229	197.582	0.079957	0.103267	0.438768	0.560666	496.063	241.276	0.372583	0.10328	0.000309142	0.00104293
FBgn0010421	TfIIFbeta	3R	10766622	10767804	-	1118	379.518	339.462	569.537	509.425	0.58511	0.10789	5.85423e-08	2.84836e-07	538.272	481.459	0.503712	0.109247	4.01194e-06	1.83456e-05
FBgn0010422	TfIIS	2L	15058919	15060757	-	1773	1651.46	931.45	3444.76	1942.9	1.05934	0.0631352	3.47888e-63	2.11712e-61	2711.83	1529.51	0.714881	0.0638538	4.2858e-29	1.14426e-27
FBgn0010423	TpnC47D	2R	11273845	11275286	-	791	0	0	0	0	NA	NA	NA	NA	0	0	NA	NA	NA	NA
FBgn0010424	TpnC73F	3L	17046063	17048390	+	1059	3.58524	3.3855	5.00285	4.72413	0.418777	0.963552	0.66384	0.756459	3.97198	3.75069	0.0854045	0.995101	0.931606	0.954182
FBgn0010425	epsilonTry	2R	11345237	11346066	-	830	0	0	0	0	NA	NA	NA	NA	0	0	NA	NA	NA	NA
FBgn0010431	mtrm	3L	8413012	8414103	+	1092	0.731111	0.669515	0.355025	0.325114	-1.38879	2.19048	0.526071	0.639758	1.74498	1.59797	1.17489	1.95346	0.547547	0.670311
FBgn0010433	ato	3R	8278052	8279274	+	1223	0	0	0	0	NA	NA	NA	NA	0	0	NA	NA	NA	NA
FBgn0010434	cora	2R	19229063	19243751	+	6043	7819.47	1293.97	5662.64	937.059	-0.466433	0.0629761	1.29675e-13	1.01454e-12	6410.85	1060.87	-0.287131	0.0630367	5.23908e-06	2.36091e-05
FBgn0010435	emp	2R	24976456	24986070	-	3522	48.8224	13.8621	15.0797	4.28158	-1.71545	0.342084	5.31135e-07	2.32569e-06	17.1808	4.87815	-1.50893	0.346103	1.30202e-05	5.48185e-05
FBgn0010438	mtSSB	3R	16204194	16205250	-	575	221.884	385.885	389.937	678.152	0.819122	0.11965	7.59439e-12	5.09787e-11	382.319	664.902	0.788502	0.121176	7.6631e-11	5.99291e-10
FBgn0010441	pll	3R	27251131	27253182	-	1931	318.365	164.871	207.111	107.256	-0.625863	0.124752	5.25255e-07	2.30193e-06	233.925	121.142	-0.447806	0.125706	0.000367594	0.00122556
FBgn0010452	trn	3L	13114271	13118077	+	3365	5.72035	1.69996	4.39437	1.3059	-0.321318	0.642213	0.616843	0.719332	25.8285	7.67563	2.19714	0.560748	8.92016e-05	0.000331568
FBgn0010453	Wnt4	2L	7255419	7277171	-	3367	17.4247	5.17515	2.62478	0.779562	-2.83624	0.728826	9.96203e-05	0.000318178	1.95315	0.580086	-3.14899	0.808711	9.8669e-05	0.000363494
FBgn0010470	Fkbp14	2R	21487167	21497929	-	1800	2440.36	1355.75	3339.73	1855.41	0.452174	0.0744689	1.26339e-09	7.08598e-09	2982.73	1657.07	0.288477	0.0748884	0.000117114	0.00042657
FBgn0010473	tutl	2L	4283148	4323781	+	9888	797.455	80.6487	2822.89	285.486	1.8228	0.0749534	1.23087e-130	2.66156e-128	2766.3	279.763	1.79328	0.0752835	2.05485e-125	7.5588e-123
FBgn0010482	l(2)01289	2R	6721101	6740672	-	9515	18.9338	1.98989	4.95253	0.520497	-1.96441	0.606056	0.00118986	0.00320756	10.227	1.07483	-0.86472	0.564189	0.125355	0.21713
FBgn0010488	NAT1	2R	12915994	12923734	+	5665	8460.52	1493.47	7501.61	1324.2	-0.174351	0.0655122	0.00778257	0.0179719	8027.64	1417.06	-0.0763109	0.0655922	0.244661	0.367733
FBgn0010497	dmGlut	2L	12027438	12034122	+	2426	106.23	43.7882	51.3366	21.161	-1.04537	0.216499	1.37543e-06	5.71485e-06	38.6882	15.9473	-1.45297	0.232168	3.89311e-10	2.83686e-09
FBgn0010501	Dcp-1	2R	23551313	23553547	+	1749	1249.89	714.63	1559.59	891.702	0.31479	0.0802681	8.79146e-05	0.000284094	1405.51	803.606	0.166628	0.0810713	0.039848	0.0824999
FBgn0010504	kermit	2R	8146918	8156654	-	2633	73.2512	27.8204	65.2432	24.779	-0.152921	0.214537	0.475973	0.594866	64.835	24.624	-0.17335	0.219495	0.429662	0.565743
FBgn0010516	wal	2R	11688569	11690863	-	1579	1486.44	941.381	1235.79	782.642	-0.265306	0.0676223	8.73273e-05	0.000282376	1210.6	766.689	-0.295847	0.06847	1.55445e-05	6.45704e-05
FBgn0010520	Bka	2L	9895287	9896104	+	758	39.894	52.6307	58.2885	76.8978	0.573767	0.259454	0.0270053	0.054946	53.8705	71.0692	0.461631	0.265564	0.0821575	0.153266
FBgn0010531	Ccs	2R	10121486	10122574	-	977	73.4157	75.144	110.2	112.795	0.583338	0.186184	0.00172958	0.00453267	133.866	137.017	0.857209	0.186427	4.26356e-06	1.9389e-05
FBgn0010548	Aldh-III	2R	7466879	7477162	-	3593	663.559	184.681	250.012	69.5831	-1.41417	0.103996	4.09862e-42	1.35241e-40	277.291	77.1752	-1.25858	0.105143	5.09065e-33	1.65772e-31
FBgn0010549	l(2)03659	2R	9390165	9395281	+	4499	3.52119	0.78266	2.35442	0.523322	-0.492802	0.900925	0.584382	0.690689	12.2255	2.71739	1.78735	0.803411	0.0261011	0.0570378
FBgn0010551	Phb2	2R	18819467	18822250	+	1889	1329.57	703.848	1561.21	826.476	0.233327	0.0815801	0.00423518	0.0103194	1629.02	862.373	0.295887	0.0819582	0.000305936	0.00103352
FBgn0010583	dock	2L	825969	833241	+	3735	804.846	215.487	692.246	185.34	-0.222181	0.0826704	0.00719783	0.0167587	620.084	166.02	-0.376742	0.084468	8.18926e-06	3.56736e-05
FBgn0010590	Prosbeta1	2R	16013805	16014787	-	852	1638.7	1923.35	1773.93	2082.08	0.115432	0.0873657	0.186419	0.286883	1601.78	1880.02	-0.0306178	0.0880092	0.72792	0.813314
FBgn0010591	Sply	2R	17088441	17091958	-	2163	620.043	286.659	330.436	152.768	-0.901959	0.105148	9.6531e-18	1.00107e-16	377.05	174.318	-0.71854	0.105807	1.11319e-11	9.40952e-11
FBgn0010602	lwr	2L	540599	542580	-	1864	1537.42	824.796	1823.24	978.134	0.246345	0.0772307	0.00142404	0.00378069	2031.58	1089.91	0.402608	0.0774232	1.9918e-07	1.06875e-06
FBgn0010607	l(2)05714	2L	4970135	4973921	-	1285	841.821	655.114	1064.32	828.262	0.336452	0.105227	0.00138671	0.00368833	850.882	662.165	0.0141985	0.106561	0.894002	0.930639
FBgn0010611	Hmgs	2R	16336090	16341242	+	2795	2215.54	792.68	958.805	343.043	-1.20547	0.0940582	1.33018e-37	3.71392e-36	1158.25	414.399	-0.936566	0.0941	2.44971e-23	4.83709e-22
FBgn0010612	ATPsynG	2L	10975522	10976399	-	789	357.609	453.243	511.631	648.454	0.52765	0.132855	7.13809e-05	0.000233637	491.181	622.536	0.467565	0.133998	0.000484206	0.00157728
FBgn0010620	CG10939	2R	17394593	17405171	+	1717	39.8215	23.1925	21.6745	12.6235	-0.91292	0.328993	0.00552199	0.013149	25.9314	15.1027	-0.61939	0.32929	0.0599737	0.11751
FBgn0010621	CCT5	2R	12174802	12177516	+	1981	1346.86	679.888	1266.44	639.293	-0.0877378	0.0930331	0.345639	0.466684	1291.77	652.079	-0.0601673	0.0935102	0.519945	0.646647
FBgn0010622	DCTN3-p24	2R	23061420	23062593	-	1174	232.102	197.702	281.968	240.177	0.281394	0.128642	0.0287123	0.0580125	251.592	214.303	0.119187	0.131538	0.364884	0.499727
FBgn0010638	Sec61beta	2R	14618771	14619681	+	792	1008.16	1272.93	1262.88	1594.54	0.326229	0.0838191	9.93988e-05	0.00031767	1268.02	1601.04	0.330367	0.0844046	9.07472e-05	0.000336809
FBgn0010651	MFS14	2R	18796975	18803727	-	3288	266.604	81.0839	768.291	233.665	1.52687	0.11043	1.76309e-43	6.17955e-42	980.035	298.064	1.88011	0.110282	3.60884e-65	3.98255e-63
FBgn0010660	Nup214	2R	22918937	22924742	-	5334	2522.2	472.854	2773.6	519.984	0.135179	0.0600021	0.0242657	0.050033	2804.11	525.705	0.151365	0.060357	0.0121474	0.0290577
FBgn0010741	Pfdn2	3L	11073292	11074388	-	993	1659.95	1671.65	1426.87	1436.93	-0.216164	0.108092	0.0455214	0.0865383	1262.88	1271.78	-0.395005	0.108794	0.000282603	0.00096025
FBgn0010747	Srp54k	3L	5152678	5154777	+	2015	501.072	248.671	517.104	256.628	0.0481582	0.0957907	0.615144	0.717746	485.874	241.128	-0.0400423	0.0975197	0.681361	0.778026
FBgn0010750	atms	3R	4750035	4777490	+	2040	447.004	219.12	521.493	255.634	0.220209	0.11301	0.0513447	0.0962406	451.291	221.221	0.00914892	0.115005	0.936593	0.957809
FBgn0010762	simj	3L	10664739	10690734	+	5134	1957	381.185	2611.69	508.704	0.413259	0.0755574	4.5139e-08	2.21403e-07	2008.22	391.161	0.0354539	0.0764018	0.642615	0.751779
FBgn0010768	sqz	3R	19164211	19170576	+	3258	241.133	74.0127	421.528	129.382	0.804364	0.119495	1.68053e-11	1.10259e-10	456.272	140.047	0.924813	0.120212	1.43508e-14	1.54255e-13
FBgn0010770	ppan	3R	21116254	21117899	+	1477	918.533	621.891	1333.81	903.054	0.538849	0.0782956	5.892e-12	4.00538e-11	1036.85	701.997	0.177054	0.0798414	0.0265843	0.0580125
FBgn0010772	Xe7	3R	5665139	5669334	-	3325	2576.39	774.853	2288	688.121	-0.173467	0.0805538	0.0312846	0.0624647	2024.61	608.904	-0.349785	0.0811388	1.62556e-05	6.72431e-05
FBgn0010774	Ref1	3R	7077904	7080387	-	1328	3357.47	2528.21	5016.57	3777.54	0.578681	0.0778875	1.08837e-13	8.55463e-13	4610.86	3472.03	0.456557	0.0781258	5.10015e-09	3.3086e-08
FBgn0010786	l(3)02640	3L	1334889	1339415	+	2556	1119.49	437.986	549.515	214.99	-1.02529	0.0812283	1.58927e-36	4.2393e-35	922.04	360.735	-0.279388	0.0795042	0.00044121	0.00144671
FBgn0010803	TrpRS	3R	9265027	9266904	-	1683	791.965	470.568	772.985	459.29	-0.0311393	0.117662	0.791279	0.857057	964.689	573.196	0.284038	0.117601	0.0157235	0.0365385
FBgn0010808	Chchd3	3R	31052616	31053915	-	940	263.686	280.517	228.196	242.762	-0.205598	0.129147	0.111391	0.186411	258.952	275.481	-0.0217919	0.129929	0.866802	0.912365
FBgn0010812	unc-45	3R	8033301	8037403	+	3987	889.267	223.042	451.255	113.181	-0.981475	0.117157	5.41087e-17	5.31825e-16	454.015	113.874	-0.972623	0.118315	2.02485e-16	2.53285e-15
FBgn0010825	Gug	3L	8449922	8472669	+	8819	2957.61	335.368	4864.09	551.547	0.715976	0.0753265	2.00112e-21	2.62757e-20	3653.28	414.251	0.303728	0.0758114	6.16611e-05	0.000235364
FBgn0010830	l(3)04053	3L	22738602	22741388	-	2469	313.023	126.781	289.446	117.232	-0.118552	0.11443	0.300191	0.418038	303.944	123.104	-0.0484013	0.115879	0.676175	0.773795
FBgn0010877	l(3)05822	3R	18288866	18298879	-	3531	3025.76	856.912	1779.37	503.928	-0.767063	0.0976393	3.96322e-15	3.43964e-14	1599.34	452.943	-0.920211	0.0982235	7.3537e-21	1.25926e-19
FBgn0010894	sinu	3L	5559470	5561598	-	2065	1115.2	540.05	661.154	320.171	-0.756652	0.0933243	5.15594e-16	4.72497e-15	674.593	326.679	-0.723628	0.094227	1.59554e-14	1.70764e-13
FBgn0010905	Spn	3L	2505245	2554292	-	10266	1004	97.7986	879.508	85.6719	-0.195352	0.0801794	0.0148327	0.0321899	884.868	86.194	-0.185192	0.0810471	0.0223133	0.0498009
FBgn0010909	msn	3L	2554847	2586540	-	6833	7888.44	1154.46	4920.05	720.042	-0.682194	0.067431	4.6482e-24	7.12514e-23	7696.77	1126.41	-0.0358094	0.0672381	0.594328	0.710418
FBgn0010926	l(3)07882	3R	17535533	17539963	-	4315	394.1	91.3325	718.999	166.628	0.865756	0.105925	3.00017e-16	2.782e-15	637.335	147.702	0.689903	0.107343	1.30055e-10	9.93621e-10
FBgn0011016	SsRbeta	3L	16129617	16130983	+	950	281.593	296.414	290.368	305.651	0.0456936	0.134398	0.733866	0.814489	296.714	312.331	0.0779925	0.135836	0.565855	0.685865
FBgn0011020	Sas-4	3R	7151367	7154219	+	2802	391.436	139.699	580.761	207.267	0.571579	0.0907343	2.98645e-10	1.77909e-09	543.917	194.117	0.476374	0.0923942	2.52441e-07	1.33577e-06
FBgn0011202	dia	2L	20758144	20768053	+	6718	1440.04	214.355	1123.52	167.241	-0.360015	0.0743484	1.28365e-06	5.35758e-06	1029.18	153.197	-0.487223	0.0754875	1.0868e-10	8.35453e-10
FBgn0011204	cue	3L	1503226	1517271	-	2801	764.454	272.922	415.122	148.205	-0.885325	0.0950053	1.17776e-20	1.47409e-19	680.347	242.894	-0.168556	0.0931582	0.070396	0.134897
FBgn0011205	fbl	3L	20384429	20391913	+	3513	441.174	125.583	416.299	118.502	-0.0855555	0.0992794	0.388817	0.510893	406.963	115.845	-0.115037	0.101007	0.254744	0.379158
FBgn0011206	bol	3L	9097629	9134405	-	8169	477.927	58.5049	495.032	60.5988	0.0497549	0.0956168	0.602814	0.706295	605.535	74.1259	0.338841	0.0956398	0.000395781	0.00131074
FBgn0011207	pelo	2L	9700810	9708883	+	2045	995.077	486.59	1482.96	725.166	0.575441	0.0827616	3.57611e-12	2.48761e-11	1300.31	635.85	0.385398	0.0836712	4.10283e-06	1.87343e-05
FBgn0011211	blw	2R	22799099	22802180	+	2252	13220.2	5870.42	12683.6	5632.14	-0.0601584	0.0747462	0.420914	0.543	14526.3	6450.4	0.135938	0.0747648	0.0690326	0.132592
FBgn0011217	eff	3R	14732414	14741319	-	2375	17001.6	7158.59	19594.3	8250.23	0.204465	0.0667152	0.00217859	0.00560389	17358.5	7308.84	0.0297775	0.0667971	0.655749	0.760409
FBgn0011224	heph	3R	31846987	32015520	-	12120	1056.37	87.1595	1207.85	99.6572	0.188224	0.0999883	0.0597735	0.109713	1140.13	94.0698	0.108305	0.100673	0.282014	0.410759
FBgn0011225	jar	3R	24252826	24271233	-	5641	850.305	150.736	107.267	19.0155	-2.98123	0.114976	3.1251e-148	8.82234e-146	392.08	69.5053	-1.1133	0.0988452	1.99637e-29	5.4027e-28
FBgn0011227	ox	2R	12757133	12757529	-	331	28.2081	85.2208	41.8893	126.554	0.609307	0.300718	0.0427468	0.0820155	47.9656	144.911	0.792928	0.30257	0.00877638	0.0217754
FBgn0011230	poe	2L	8054322	8071624	-	16216	9319.06	574.683	6400.52	394.704	-0.542221	0.0827391	5.62483e-11	3.53308e-10	6996.6	431.463	-0.41402	0.0828004	5.72641e-07	2.89291e-06
FBgn0011232	scat	2L	9431405	9435341	+	3558	428.797	120.516	378.035	106.249	-0.183875	0.103571	0.0758382	0.134463	384.253	107.997	-0.15564	0.105043	0.138424	0.235416
FBgn0011236	ken	2R	23870273	23877442	+	3070	1921.54	625.908	1645.04	535.843	-0.227709	0.0807532	0.00480517	0.0115821	1711.59	557.52	-0.168085	0.0811208	0.0382618	0.0796346
FBgn0011239	ms(2)35Ci	2L	15292468	15294136	+	1489	0	0	0	0	NA	NA	NA	NA	0	0	NA	NA	NA	NA
FBgn0011244	Hsp60B	2L	728362	730564	+	2203	0.365555	0.165935	0	0	-1.52464	4.08046	0.708668	NA	0	0	-1.21951	4.08052	0.765046	NA
FBgn0011259	Sema1a	2L	8542147	8672041	+	10190	340.241	33.3897	459.882	45.1307	0.429783	0.10609	5.09754e-05	0.000170584	566.9	55.633	0.732512	0.106053	4.94864e-12	4.33039e-11
FBgn0011260	Sema2a	2R	16500178	16533459	+	4171	1837.78	440.608	2187.42	524.436	0.250256	0.0677276	0.000219857	0.000665397	1715.31	411.247	-0.0995683	0.0687925	0.147793	0.247869
FBgn0011270	Pglym87	3R	12231645	12232729	-	1085	0	0	0	0	NA	NA	NA	NA	0	0	NA	NA	NA	NA
FBgn0011272	RpL13	2L	9967313	9968645	+	1203	11444.8	9513.54	14401.1	11971	0.331456	0.0663701	5.91223e-07	2.57548e-06	16389.1	13623.5	0.518283	0.0663907	5.87666e-15	6.46367e-14
FBgn0011273	Acam	3R	25811911	25813134	+	1224	0	0	0	0	NA	NA	NA	NA	0	0	NA	NA	NA	NA
FBgn0011274	Dif	2L	17413248	17433161	-	5695	1454.03	255.316	1441.02	253.032	-0.016285	0.0716592	0.820225	0.877191	1091.84	191.72	-0.414844	0.0733328	1.5404e-08	9.46149e-08
FBgn0011276	HLH3B	X	2680199	2681723	-	1428	0.491696	0.344325	0.253458	0.177491	-0.562883	2.95077	0.848715	NA	0.32456	0.227283	-0.257723	2.95079	0.930401	NA
FBgn0011277	HLH4C	X	4645127	4647414	-	1424	0.85022	0.597065	0	0	-2.48573	3.37559	0.461496	NA	0	0	-2.1806	3.37563	0.518291	NA
FBgn0011278	lbe	3R	21441577	21446537	-	2277	0	0	0	0	NA	NA	NA	NA	0	0	NA	NA	NA	NA
FBgn0011279	Obp69a	3L	12396171	12396957	+	546	0	0	0	0	NA	NA	NA	NA	0	0	NA	NA	NA	NA
FBgn0011280	Obp19d	X	20419613	20420979	+	1101	2.678	2.43233	0.577181	0.524233	-2.32536	1.4872	0.117916	0.195487	2.73364	2.48287	-0.00616525	1.1992	0.995898	0.997404
FBgn0011281	Obp83a	3R	5972155	5975245	-	986	0	0	0	0	NA	NA	NA	NA	0	0	NA	NA	NA	NA
FBgn0011282	Obp84a	3R	7250725	7251957	-	817	0	0	0	0	NA	NA	NA	NA	0	0	NA	NA	NA	NA
FBgn0011283	Obp28a	2L	7496791	7497365	-	575	0.491696	0.855124	0	0	-1.52464	4.08046	0.708668	NA	0	0	-1.21951	4.08052	0.765046	NA
FBgn0011284	RpS4	3L	13041756	13044234	+	1449	9673.52	6676	11125.4	7677.97	0.202242	0.0729616	0.005573	0.0132674	13290.5	9172.17	0.458267	0.0729681	3.37751e-10	2.47385e-09
FBgn0011286	RyR	2R	8860364	8888097	+	16405	28.3808	1.73001	5.80985	0.354151	-2.29313	0.512934	7.79965e-06	2.92717e-05	10.781	0.657175	-1.3902	0.480192	0.00379039	0.0102746
FBgn0011288	Snap25	3L	24074180	24299205	+	2282	262.523	115.041	131.467	57.6104	-1.00489	0.133483	5.14255e-14	4.15121e-13	276.391	121.118	0.0755426	0.126562	0.550585	0.672839
FBgn0011289	TfIIA-L	3R	27251112	27256463	+	1645	776.907	472.284	727.636	442.332	-0.0965218	0.0854597	0.258711	0.372631	700.574	425.881	-0.148852	0.0866904	0.0859687	0.15915
FBgn0011290	Taf12	3R	11678386	11679690	-	1234	408.279	330.858	488.165	395.595	0.256848	0.104534	0.014007	0.0305806	492.285	398.934	0.272602	0.105713	0.00991738	0.0243088
FBgn0011291	Taf11	2L	9762424	9763262	-	777	213.035	274.176	246.172	316.823	0.212175	0.151092	0.160237	0.252988	218.988	281.838	0.0371056	0.153986	0.80958	0.874184
FBgn0011293	a10	3L	17023123	17023741	-	567	0	0	0	0	NA	NA	NA	NA	0	0	NA	NA	NA	NA
FBgn0011294	a5	2L	1329161	1329993	+	776	0	0	0	0	NA	NA	NA	NA	0	0	NA	NA	NA	NA
FBgn0011296	l(2)efl	2R	23684651	23685543	-	741	0	0	0	0	NA	NA	NA	NA	0	0	NA	NA	NA	NA
FBgn0011297	Alg3	2R	23705439	23709792	-	1704	162.509	95.3691	268.137	157.357	0.72903	0.147018	7.09319e-07	3.05199e-06	324.987	190.72	1.00739	0.14709	7.44716e-12	6.38181e-11
FBgn0011300	babo	2R	8952339	8962796	+	5113	1522.21	297.714	1445.46	282.703	-0.0779235	0.0748936	0.298128	0.415963	1449.62	283.516	-0.0716572	0.0754633	0.342334	0.476266
FBgn0011305	Rsf1	2L	10261795	10263554	-	1760	747.672	424.814	1134.03	644.336	0.597501	0.10069	2.95505e-09	1.60772e-08	1058.81	601.598	0.502269	0.101449	7.386e-07	3.66972e-06
FBgn0011327	Uch-L5	3L	9475493	9476965	-	1394	1084.56	778.022	1273.43	913.509	0.233108	0.069472	0.000792423	0.00219918	1239.74	889.34	0.19453	0.0702952	0.00565174	0.0147099
FBgn0011335	vers	3L	12116101	12118055	+	1513	243.258	160.779	442.134	292.223	0.861514	0.120184	7.59561e-13	5.58973e-12	345.79	228.546	0.502443	0.123198	4.53571e-05	0.000176731
FBgn0011336	Stt3B	3R	25066712	25069637	-	2703	955.448	353.477	1069.92	395.828	0.163606	0.0785	0.0371465	0.0725443	1227.85	454.256	0.362076	0.0787236	4.23837e-06	1.9301e-05
FBgn0011361	ND-ACP	3L	1329949	1331631	+	842	862.238	1024.04	653.174	775.741	-0.399361	0.107865	0.000213563	0.000647314	716.081	850.452	-0.263484	0.108319	0.0149959	0.0350694
FBgn0011455	ND-SGDH	3L	12137496	12138584	-	888	400.095	450.557	384.621	433.132	-0.0479889	0.109393	0.660892	0.754622	385.322	433.921	-0.0476546	0.11091	0.667436	0.768487
FBgn0011474	PR-Set7	3R	14316038	14320494	+	4183	1013.91	242.388	1123.73	268.642	0.146832	0.0806865	0.0687919	0.123609	996.606	238.251	-0.0229171	0.0818615	0.779516	0.852754
FBgn0011476	l(3)neo43	3R	15277981	15278668	-	627	36.8631	58.7928	51.1288	81.5452	0.461484	0.255706	0.0711144	0.127242	59.4411	94.8024	0.679191	0.256994	0.00822174	0.0205533
FBgn0011481	Ssdp	3R	18192494	18199595	-	5521	4113.48	745.062	5978.82	1082.92	0.537998	0.0816833	4.50647e-11	2.85176e-10	6355.11	1151.08	0.626504	0.0817681	1.83124e-14	1.95358e-13
FBgn0011509	SrpRbeta	3L	8718949	8720225	-	1135	256.7	226.168	244.276	215.221	-0.079066	0.125323	0.528108	0.641467	242.282	213.465	-0.0838245	0.127469	0.510792	0.639021
FBgn0011554	etaTry	2R	11340513	11341423	-	911	0	0	0	0	NA	NA	NA	NA	0	0	NA	NA	NA	NA
FBgn0011555	thetaTry	2R	11341714	11342760	-	1047	0	0	0	0	NA	NA	NA	NA	0	0	NA	NA	NA	NA
FBgn0011556	zetaTry	2R	11339186	11340132	-	947	0	0	0	0	NA	NA	NA	NA	0	0	NA	NA	NA	NA
FBgn0011559	Acp36DE	2L	18356047	18359028	-	2921	12.23	4.18693	10.8486	3.71401	-0.213234	0.502998	0.671619	0.763241	14.0096	4.79618	0.168483	0.500212	0.73625	0.8207
FBgn0011566	Smyd3	X	2606680	2608876	-	1762	167.657	95.1515	199.419	113.178	0.24935	0.139948	0.0747919	0.132794	174.895	99.2592	0.0581737	0.143973	0.68617	0.781929
FBgn0011569	can	3L	10263909	10267111	-	2953	0	0	0	0	NA	NA	NA	NA	0	0	NA	NA	NA	NA
FBgn0011570	cpb	2L	1704902	1706962	+	1926	4912.88	2550.82	4800.51	2492.48	-0.0325856	0.0644235	0.612995	0.715995	5077.76	2636.43	0.0480252	0.0645641	0.456975	0.591666
FBgn0011573	Cdc37	3L	1795392	1797307	+	1611	3544.38	2200.11	4094.76	2541.75	0.20877	0.0790915	0.0083005	0.019051	4095.6	2542.27	0.208478	0.0792843	0.0085512	0.0212699
FBgn0011576	Cyp4d2	X	2176006	2178728	+	2467	188.518	76.4157	214.129	86.7972	0.195314	0.183834	0.288032	0.405495	184.603	74.8289	-0.0283599	0.186889	0.879386	0.921023
FBgn0011581	Ms	3R	24341551	24343825	+	1178	0	0	0	0	NA	NA	NA	NA	0	0	NA	NA	NA	NA
FBgn0011582	Dop1R1	3R	14165379	14214810	-	14565	0.731111	0.0501964	0.253458	0.0174018	-1.37099	2.60901	0.599247	0.702764	0.64912	0.0445671	-0.201076	2.54639	0.93706	NA
FBgn0011584	Trp1	2L	10009381	10013170	+	2459	2629.2	1069.21	2342.74	952.719	-0.166755	0.0789904	0.0347651	0.0685122	2597.32	1056.25	-0.0182869	0.0791445	0.817271	0.880765
FBgn0011586	e(r)	X	8904144	8906248	-	1687	4044.51	2397.46	7105.41	4211.86	0.81189	0.0786072	5.24081e-25	8.44094e-24	6676.79	3957.79	0.722372	0.0787587	4.64463e-20	7.51507e-19
FBgn0011589	Elk	2R	17873939	17926695	+	5351	11.2095	2.09485	0.222156	0.0415166	-5.26085	1.37256	0.00012665	0.000399485	4.23472	0.791388	-1.43626	0.81565	0.0782597	0.147267
FBgn0011591	fng	3L	20925891	20949512	-	1959	21.8629	11.1602	60.971	31.1235	1.50149	0.306717	9.81309e-07	4.14507e-06	40.8963	20.8761	0.92541	0.319048	0.00372526	0.0101174
FBgn0011592	fra	2R	12529053	12564184	+	6320	476.049	75.3242	748.52	118.437	0.652344	0.0871006	6.91134e-14	5.52201e-13	719.124	113.785	0.595602	0.0882913	1.52106e-11	1.26844e-10
FBgn0011596	fzo	3R	23201644	23204034	-	2391	9.34659	3.90907	4.74265	1.98354	-1.04051	0.703719	0.139249	0.224812	8.3738	3.50222	-0.168049	0.674074	0.803127	0.869769
FBgn0011603	ine	2L	4468000	4477022	-	3965	0.724079	0.182618	1.18566	0.299032	0.566469	1.77614	0.749777	0.826463	1.02439	0.258358	0.404551	1.8284	0.82489	0.886188
FBgn0011604	Iswi	2R	12636671	12640628	+	3647	2821.92	773.764	3686.66	1010.87	0.385459	0.0782281	8.33432e-07	3.54995e-06	3142.48	861.662	0.154279	0.0786543	0.0498233	0.10007
FBgn0011606	Klp3A	X	2599158	2604052	-	4527	1014.14	224.02	1249.34	275.974	0.298817	0.0791415	0.000159541	0.000493883	1163.8	257.08	0.196832	0.0800365	0.0139218	0.032789
FBgn0011638	La	2L	20348393	20350012	-	1549	3617.59	2335.44	4355.23	2811.64	0.269094	0.0651063	3.57827e-05	0.000122115	4109.49	2653	0.184788	0.0654005	0.00472105	0.0125072
FBgn0011640	lark	3L	7339266	7341893	+	2192	926.152	422.515	1453.62	663.15	0.647071	0.081189	1.5876e-15	1.41039e-14	1321.6	602.918	0.512245	0.0820121	4.21167e-10	3.06001e-09
FBgn0011642	Zyx	4	1057365	1065001	-	2377	1019.24	428.793	803.232	337.918	-0.342648	0.0766013	7.70792e-06	2.89595e-05	740.767	311.639	-0.461193	0.0781145	3.54662e-09	2.33587e-08
FBgn0011648	Mad	2L	3146056	3159643	-	3412	690.603	202.404	1060.84	310.916	0.617197	0.0786571	4.27195e-15	3.70126e-14	767.177	224.847	0.149562	0.0809874	0.0647854	0.125526
FBgn0011653	mas	3L	4161666	4167464	-	3657	1.44816	0.395996	0.506915	0.138615	-1.50664	2.27892	0.508534	0.625694	0	0	-3.00418	2.34571	0.200295	0.313923
FBgn0011655	Med	3R	31611046	31615375	+	3425	724.438	211.515	729.281	212.929	0.00774532	0.0860647	0.928292	0.95353	559.551	163.373	-0.371649	0.0887177	2.80043e-05	0.000112198
FBgn0011656	Mef2	2R	9913496	9958858	-	9188	2447.17	266.344	2389.94	260.115	-0.0352446	0.090932	0.698318	0.785936	2237.92	243.57	-0.129364	0.0913275	0.156634	0.259152
FBgn0011659	Mlh1	2R	8170274	8172401	+	2075	124.836	60.1617	186.178	89.7244	0.581891	0.146938	7.49133e-05	0.000244494	177.379	85.4839	0.514754	0.149897	0.00059464	0.00190638
FBgn0011660	Pms2	2R	15368074	15371520	-	3040	442.066	145.416	416.948	137.154	-0.0853445	0.105606	0.419009	0.54116	389.549	128.141	-0.186844	0.107621	0.0825407	0.153759
FBgn0011661	Moe	X	8873012	8898332	-	4558	22524.9	4941.84	23314.2	5115	0.0494964	0.068628	0.47077	0.590452	22001.4	4826.99	-0.0338772	0.0686798	0.621827	0.734624
FBgn0011666	msi	3R	25516118	25608423	+	11500	1818.41	158.123	2055.1	178.705	0.17265	0.0850501	0.0423586	0.0813935	1907.11	165.836	0.0669486	0.0855603	0.433936	0.56971
FBgn0011668	Mst57Da	3R	25831575	25831899	-	325	0	0	0	0	NA	NA	NA	NA	0	0	NA	NA	NA	NA
FBgn0011669	Mst57Db	3R	25830720	25830914	-	195	0	0	0	0	NA	NA	NA	NA	0	0	NA	NA	NA	NA
FBgn0011670	Mst57Dc	3R	25829321	25829698	-	378	0	0	0	0	0	4.08046	1	NA	0.309586	0.819012	0.704067	4.08052	0.86301	NA
FBgn0011672	Mvl	3R	21051383	21060800	-	5647	600.422	106.326	407.942	72.2405	-0.557018	0.0995428	2.19654e-08	1.11062e-07	524.677	92.9125	-0.195947	0.0992303	0.0483059	0.0975168
FBgn0011674	insc	2R	20821262	20836028	-	3887	22.5542	5.80246	23.874	6.14201	0.042738	0.375516	0.909387	0.941689	20.5694	5.29184	-0.154064	0.38849	0.691684	0.786019
FBgn0011676	Nos	2L	10804274	10837511	-	5224	84.3858	16.1535	16.556	3.16921	-2.32358	0.302479	1.56887e-14	1.31446e-13	19.2166	3.67852	-2.12805	0.306965	4.133e-12	3.64232e-11
FBgn0011692	pav	3L	4242734	4246233	+	3207	2041.68	636.631	4372.63	1363.46	1.09793	0.0673416	9.26135e-60	5.22906e-58	3539.08	1103.55	0.793943	0.0678311	1.20578e-31	3.69624e-30
FBgn0011693	Pdh	3L	16353233	16354297	-	945	0	0	0	0	NA	NA	NA	NA	0	0	NA	NA	NA	NA
FBgn0011694	EbpII	2R	25173568	25174230	-	608	0	0	0	0	NA	NA	NA	NA	0	0	NA	NA	NA	NA
FBgn0011695	EbpIII	2R	24026172	24027518	+	1160	4.85607	4.18627	0	0	-5.01161	1.6271	0.00206942	0.00534201	0.309586	0.266885	-3.74466	1.62711	0.0213678	0.0480148
FBgn0011701	repo	3R	18236192	18239602	+	2996	14.7865	4.93543	13.0245	4.34729	-0.190382	0.45385	0.674864	0.76573	20.6312	6.88625	0.488582	0.442662	0.269708	0.396674
FBgn0011703	RnrL	2L	10325026	10327943	-	2577	1838.88	713.576	2465.83	956.862	0.425101	0.070646	1.77302e-09	9.81439e-09	2186.18	848.343	0.249602	0.0712634	0.000460859	0.00150667
FBgn0011704	RnrS	2R	11983145	11985393	-	1593	891.022	559.336	967.212	607.164	0.115899	0.0916372	0.205957	0.309911	1411.11	885.82	0.663754	0.0911036	3.19988e-13	3.08556e-12
FBgn0011705	rost	2L	8985936	8989539	-	1671	472.865	282.983	219.463	131.336	-1.1126	0.117208	2.25508e-21	2.94581e-20	207.343	124.083	-1.18898	0.120447	5.54052e-23	1.06644e-21
FBgn0011706	rpr	3L	18397535	18398435	-	901	34.769	38.5893	4.95253	5.4967	-2.85283	0.497701	9.92404e-09	5.16691e-08	6.69064	7.4258	-2.38594	0.48586	9.07271e-07	4.44111e-06
FBgn0011708	Syx5	2L	16307346	16309274	+	1861	1461.06	785.093	1252.93	673.254	-0.224451	0.0734502	0.00224441	0.005763	1166.73	626.939	-0.326759	0.0744146	1.12801e-05	4.80628e-05
FBgn0011710	44440	X	21358286	21361688	+	2026	3370.81	1663.77	2498.95	1233.44	-0.433985	0.0896566	1.29496e-06	5.39592e-06	2399.97	1184.59	-0.490333	0.0899976	5.0856e-08	2.94054e-07
FBgn0011715	Snr1	3R	5470926	5472754	+	1335	603.01	451.693	849.884	636.617	0.493583	0.081195	1.20948e-09	6.80499e-09	802.038	600.778	0.409994	0.0824153	6.53401e-07	3.27095e-06
FBgn0011722	Tig	2L	6415179	6423310	-	7018	969.958	138.21	19.4931	2.77759	-5.6418	0.202071	1.53227e-171	5.76758e-169	182.55	26.0117	-2.4093	0.126418	5.62103e-81	9.00452e-79
FBgn0011723	byn	3L	11927693	11935919	+	2650	0	0	0	0	0	4.08046	1	NA	0.309586	0.116825	0.704067	4.08052	0.86301	NA
FBgn0011725	twin	3R	24196893	24221965	-	4723	878.692	186.045	1169.89	247.7	0.410852	0.0745417	3.55375e-08	1.75665e-07	1101.87	233.299	0.324444	0.0755138	1.73526e-05	7.15722e-05
FBgn0011726	tsr	2R	24044453	24046805	-	735	2260.12	3074.99	2214.14	3012.44	-0.0278057	0.100725	0.782506	0.850674	2166.13	2947.11	-0.0611622	0.101041	0.544967	0.668059
FBgn0011737	Wee1	2L	6911090	6914138	-	2652	346.641	130.709	457.674	172.577	0.396927	0.101385	9.03851e-05	0.000291614	389.574	146.898	0.164689	0.104054	0.113482	0.200623
FBgn0011739	wts	3R	30789625	30806619	-	5803	4659.89	803.013	5029.17	866.651	0.108972	0.077354	0.158912	0.25113	5075.94	874.71	0.122388	0.0775059	0.114318	0.201563
FBgn0011740	alpha-Man-IIa	3R	9412548	9417264	+	4002	255.745	63.9043	330.628	82.6156	0.363127	0.113101	0.00132432	0.00353629	375.972	93.946	0.552724	0.113685	1.16268e-06	5.62754e-06
FBgn0011741	Arp6	X	15735774	15737120	-	1347	278.754	206.944	363.922	270.172	0.387108	0.115671	0.000818045	0.00226375	359.464	266.863	0.363495	0.11732	0.00194629	0.00563737
FBgn0011742	Arp2	X	16548290	16553968	-	2729	645.397	236.496	579.707	212.425	-0.15834	0.0912277	0.082625	0.144879	557.308	204.217	-0.211606	0.0926823	0.0224228	0.0499894
FBgn0011743	Arp53D	2R	16774246	16775676	+	1378	0.365555	0.26528	0.222156	0.161216	-0.56288	3.91808	0.885767	NA	0	0	-1.21951	3.91814	0.755613	NA
FBgn0011745	Arp1	3R	12691743	12694232	+	1469	1034.22	704.031	912.871	621.423	-0.174296	0.0908222	0.0549733	0.102119	897.97	611.28	-0.20271	0.0916645	0.0270058	0.0588205
FBgn0011746	ana	2R	9062295	9077554	+	2611	143.555	54.981	60.2094	23.0599	-1.2701	0.174996	3.93266e-13	2.95618e-12	221.669	84.8981	0.624985	0.155957	6.13876e-05	0.000234411
FBgn0011747	Ank	4	115074	129849	-	6229	3670.99	589.338	4327.22	694.689	0.236896	0.0620154	0.000133481	0.000419081	3848.71	617.87	0.0680077	0.0624095	0.275844	0.403889
FBgn0011754	PhKgamma	X	11695137	11704394	+	3300	1154.65	349.894	880.418	266.793	-0.394221	0.0885322	8.47345e-06	3.15442e-05	875.772	265.385	-0.400488	0.0893638	7.41045e-06	3.25091e-05
FBgn0011758	B-H1	X	17397478	17403278	+	2724	0	0	0	0	NA	NA	NA	NA	0	0	NA	NA	NA	NA
FBgn0011760	ctp	X	4687800	4702034	+	4645	10603.3	2282.74	15665.1	3372.46	0.562876	0.0676134	8.43877e-17	8.19916e-16	16525.3	3557.65	0.639886	0.0676549	3.13632e-21	5.51326e-20
FBgn0011761	dhd	X	5312171	5313125	+	955	1.07557	1.12625	0	0	-2.86757	3.38166	0.396451	NA	0	0	-2.56243	3.3817	0.44861	NA
FBgn0011762	DNApol-alpha50	3L	8340314	8344404	+	1569	67.2356	42.8525	96.635	61.5902	0.538421	0.228285	0.0183464	0.0390481	69.7342	44.445	0.0509186	0.237317	0.830111	0.889104
FBgn0011763	Dp	2R	13222433	13228202	+	3198	1859.25	581.378	2412.51	754.38	0.375213	0.0627399	2.22529e-09	1.22181e-08	2094.85	655.049	0.170869	0.0635037	0.00713051	0.0181126
FBgn0011766	E2f1	3R	21620304	21660871	-	6451	13192.8	2045.08	10079.1	1562.4	-0.388986	0.0865209	6.92868e-06	2.60897e-05	11750.8	1821.55	-0.167265	0.0865349	0.0532463	0.105917
FBgn0011768	Fdh	3R	10870906	10872381	-	1337	100.258	74.9873	196.081	146.657	0.956986	0.154918	6.51683e-10	3.77597e-09	237.838	177.889	1.23189	0.155059	1.94741e-15	2.25165e-14
FBgn0011769	Fdx1	3L	9370195	9371238	-	741	38.49	51.9434	34.8435	47.0223	-0.116708	0.315978	0.711862	0.796242	39.8787	53.8175	0.0676505	0.318066	0.831566	0.890087
FBgn0011770	Gip	X	10328877	10329872	-	996	46.8454	47.0336	39.9335	40.0939	-0.207411	0.277351	0.454562	0.57442	37.7198	37.8713	-0.29417	0.285079	0.302124	0.43394
FBgn0011771	Hem	3L	22284354	22288195	-	3777	495.3	131.136	412.461	109.203	-0.259066	0.0971141	0.00763862	0.0176837	421.229	111.525	-0.233866	0.0985633	0.0176565	0.0404999
FBgn0011774	Irbp	3R	11410047	11412440	+	2149	284.138	132.218	222.683	103.622	-0.350759	0.125212	0.00508939	0.0122105	233.056	108.449	-0.28858	0.127001	0.02307	0.0512255
FBgn0011785	BRWD3	3R	24319000	24328619	+	7244	1638.34	226.165	2753.55	380.115	0.747966	0.0762467	1.02162e-22	1.44406e-21	2501.65	345.34	0.60897	0.0767124	2.04875e-15	2.35785e-14
FBgn0011787	mRpL12	3L	8956791	8957584	+	738	176.279	238.86	289.518	392.3	0.722511	0.130559	3.13062e-08	1.55582e-07	283.425	384.044	0.692078	0.132449	1.73939e-07	9.39404e-07
FBgn0011802	Gem3	3L	10459081	10463101	-	3963	552.408	139.391	762.285	192.351	0.46416	0.0928842	5.81705e-07	2.53837e-06	718.977	181.423	0.379063	0.0940753	5.593e-05	0.000215559
FBgn0011812	Lcp1Psi	2R	8432886	8433384	-	456	0	0	0	0	NA	NA	NA	NA	0	0	NA	NA	NA	NA
FBgn0011817	nmo	3L	7979046	8054147	+	6945	1596.91	229.936	1629.02	234.559	0.0254131	0.0989108	0.797233	0.861029	1747.14	251.568	0.127072	0.0991519	0.199987	0.31349
FBgn0011818	oaf	2L	2492955	2498846	+	3223	1095.75	339.978	1543.08	478.771	0.490615	0.0838883	4.96225e-09	2.65428e-08	1731.12	537.115	0.658813	0.0840782	4.66199e-15	5.16197e-14
FBgn0011822	Pgcl	X	436139	437448	-	1310	2.79008	2.12983	3.60731	2.75367	0.334582	0.769269	0.66361	0.756403	30.5732	23.3384	3.46119	0.674376	2.8602e-07	1.50066e-06
FBgn0011824	CG4038	2R	21095958	21097305	-	957	273.811	286.114	885.313	925.092	1.70367	0.126991	4.89756e-41	1.5315e-39	1079.3	1127.79	1.98702	0.126996	3.5209e-55	2.71082e-53
FBgn0011826	Pp2B-14D	X	16554627	16560016	-	5390	1935.35	359.062	1904.05	353.255	-0.0245665	0.0831976	0.767781	0.839028	1968.51	365.215	0.0234507	0.0835213	0.778883	0.852155
FBgn0011828	Pxn	3L	2601455	2630064	-	5955	103.645	17.4047	46.5065	7.80965	-1.18165	0.221214	9.21086e-08	4.39277e-07	74.4225	12.4975	-0.485535	0.214489	0.0235939	0.0522836
FBgn0011829	Ret	2L	21182446	21198762	-	4912	339.772	69.1718	359.16	73.1189	0.0836618	0.108672	0.441384	0.562763	246.653	50.2143	-0.46003	0.114269	5.67718e-05	0.00021838
FBgn0011832	Ser12	2L	2250431	2251275	-	845	0	0	0	0	NA	NA	NA	NA	0	0	NA	NA	NA	NA
FBgn0011834	Ser6	X	20962605	20963505	-	901	0	0	0	0	NA	NA	NA	NA	0	0	NA	NA	NA	NA
FBgn0011836	Taf2	3L	9884411	9888683	-	3972	616.186	155.132	692.965	174.463	0.168764	0.11189	0.131476	0.214133	737.329	185.632	0.255716	0.112441	0.0229524	0.0510099
FBgn0011837	Tis11	X	12659415	12682560	+	5015	7769.29	1549.21	7507.97	1497.1	-0.0503113	0.0806084	0.532533	0.645762	8420.66	1679.09	0.115765	0.0806484	0.151165	0.252091
FBgn0011840	tRNA:Ala-AGC-2-3	3R	17620144	17620216	-	73	0	0	0	0	NA	NA	NA	NA	0	0	NA	NA	NA	NA
FBgn0011844	tRNA:Asp-GTC-1-10	3L	13249547	13249618	+	72	0	0	0	0	NA	NA	NA	NA	0	0	NA	NA	NA	NA
FBgn0011845	tRNA:Asp-GTC-1-11	3R	24555302	24555373	+	72	0	0	0	0	0	4.08046	1	NA	0.309586	4.29981	0.704067	4.08052	0.86301	NA
FBgn0011848	tRNA:Glu-TTC-1-6	2R	19727981	19728052	-	72	0	0	0	0	NA	NA	NA	NA	0	0	NA	NA	NA	NA
FBgn0011849	tRNA:Glu-TTC-1-5	2R	19727460	19727531	-	72	0	0	0.355025	4.9309	0.398908	3.61685	0.912178	NA	0.37527	5.21208	0.704068	3.61689	0.845658	NA
FBgn0011850	tRNA:Glu-TTC-1-4	2R	19726142	19726213	-	72	0	0	0	0	NA	NA	NA	NA	0	0	NA	NA	NA	NA
FBgn0011851	tRNA:Glu-CTC-3-4	3L	1397695	1397766	+	72	0	0	0	0	NA	NA	NA	NA	0	0	NA	NA	NA	NA
FBgn0011852	tRNA:Glu-CTC-3-5	3L	1397932	1398003	+	72	0	0	0	0	NA	NA	NA	NA	0	0	NA	NA	NA	NA
FBgn0011853	tRNA:Glu-CTC-3-6	3L	1398169	1398240	+	72	0	0	0	0	NA	NA	NA	NA	0	0	NA	NA	NA	NA
FBgn0011854	tRNA:Glu-CTC-3-8	3L	1401440	1401511	+	72	0	0	0	0	NA	NA	NA	NA	0	0	NA	NA	NA	NA
FBgn0011855	tRNA:Glu-CTC-3-9	3L	1401781	1401852	+	72	0	0	0	0	NA	NA	NA	NA	0	0	NA	NA	NA	NA
FBgn0011858	tRNA:Phe-GAA-1-8	3R	16321403	16321475	+	73	0	0	0	0	NA	NA	NA	NA	0	0	NA	NA	NA	NA
FBgn0011859	tRNA:Gly-GCC-1-1	2L	1938089	1938159	-	71	0	0	0	0	NA	NA	NA	NA	0	0	NA	NA	NA	NA
FBgn0011860	tRNA:Gly-GCC-1-2	2L	2031692	2031762	+	71	0	0	0	0	0	4.08046	1	NA	0.37527	5.28549	0.704067	4.08052	0.86301	NA
FBgn0011861	tRNA:Gly-GCC-1-3	2L	7872849	7872919	+	71	0	0	0	0	NA	NA	NA	NA	0	0	NA	NA	NA	NA
FBgn0011862	tRNA:Gly-GCC-1-4	2L	14518091	14518161	+	71	0	0	0	0	NA	NA	NA	NA	0	0	NA	NA	NA	NA
FBgn0011863	tRNA:Gly-GCC-1-5	2L	14518307	14518377	-	71	0	0	0	0	NA	NA	NA	NA	0	0	NA	NA	NA	NA
FBgn0011864	tRNA:Gly-GCC-1-6	2L	14518621	14518691	-	71	0	0	0	0	NA	NA	NA	NA	0	0	NA	NA	NA	NA
FBgn0011865	tRNA:Gly-GCC-1-7	2L	14530546	14530616	-	71	0	0	0	0	NA	NA	NA	NA	0	0	NA	NA	NA	NA
FBgn0011866	tRNA:Gly-GCC-2-1	2L	14530854	14530924	-	71	0	0	0	0	NA	NA	NA	NA	0	0	NA	NA	NA	NA
FBgn0011867	tRNA:Gly-GCC-1-8	2R	16968008	16968078	+	71	0	0	0	0	NA	NA	NA	NA	0	0	NA	NA	NA	NA
FBgn0011868	tRNA:Gly-GCC-1-9	2R	18639726	18639796	-	71	0	0	0	0	NA	NA	NA	NA	0	0	NA	NA	NA	NA
FBgn0011869	tRNA:Gly-GCC-1-10	2R	20229481	20229551	+	71	0	0	0	0	NA	NA	NA	NA	0	0	NA	NA	NA	NA
FBgn0011870	tRNA:Gly-GCC-1-11	2R	20232797	20232867	+	71	0	0	0.253458	3.56982	0.398902	4.08046	0.922124	NA	0	0	0	4.08052	1	NA
FBgn0011871	tRNA:Gly-GCC-1-12	2R	21161356	21161426	-	71	0	0	0	0	NA	NA	NA	NA	0	0	NA	NA	NA	NA
FBgn0011872	tRNA:Gly-GCC-1-13	2R	21182856	21182926	+	71	0	0	0	0	NA	NA	NA	NA	0	0	NA	NA	NA	NA
FBgn0011877	tRNA:His-GTG-2-1Psi	2R	12336733	12336804	+	72	0	0	0	0	NA	NA	NA	NA	0	0	NA	NA	NA	NA
FBgn0011878	tRNA:His-GTG-1-4	2R	12336418	12336489	+	72	0	0	0	0	NA	NA	NA	NA	0	0	NA	NA	NA	NA
FBgn0011879	tRNA:Ala-TGC-2-1	2R	17392215	17392286	+	72	0	0	0	0	NA	NA	NA	NA	0	0	NA	NA	NA	NA
FBgn0011880	tRNA:Ile-AAT-1-1	2R	6166151	6166224	+	74	0	0	0	0	0	4.08046	1	NA	0.309586	4.1836	0.704067	4.08052	0.86301	NA
FBgn0011881	tRNA:Ile-AAT-1-3	2R	13430282	13430355	-	74	0	0	0	0	0	4.08046	1	NA	0.32456	4.38595	0.704067	4.08052	0.86301	NA
FBgn0011882	tRNA:Ile-AAT-1-4	2R	13430984	13431057	+	74	0	0	0	0	NA	NA	NA	NA	0	0	NA	NA	NA	NA
FBgn0011883	tRNA:Ile-AAT-1-5	2R	13431285	13431358	+	74	0	0	0	0	NA	NA	NA	NA	0	0	NA	NA	NA	NA
FBgn0011884	tRNA:Ile-AAT-1-6	2R	13431777	13431850	+	74	0	0	0	0	NA	NA	NA	NA	0	0	NA	NA	NA	NA
FBgn0011885	tRNA:Ile-AAT-1-7	2R	13432093	13432166	+	74	0	0	0	0	NA	NA	NA	NA	0	0	NA	NA	NA	NA
FBgn0011887	tRNA:Lys-CTT-1-4	2R	6165984	6166056	+	73	0	0	0	0	NA	NA	NA	NA	0	0	NA	NA	NA	NA
FBgn0011888	tRNA:Lys-CTT-1-3	2R	6164876	6164948	-	73	0	0	0	0	0	4.08046	1	NA	0.32456	4.44603	0.704067	4.08052	0.86301	NA
FBgn0011889	tRNA:Lys-CTT-1-2	2R	6162681	6162753	-	73	0	0	0	0	NA	NA	NA	NA	0	0	NA	NA	NA	NA
FBgn0011890	tRNA:Lys-CTT-1-5	2R	6171496	6171568	-	73	0	0	0	0	NA	NA	NA	NA	0	0	NA	NA	NA	NA
FBgn0011891	tRNA:Lys-CTT-1-1	2R	6142372	6142444	-	73	0	0	0.577181	7.90658	1.35296	3.06567	0.658978	NA	0.32456	4.44603	0.70407	3.12662	0.821835	NA
FBgn0011892	tRNA:Lys-CTT-1-6	2R	6946808	6946880	-	73	0	0	0	0	0	4.08046	1	NA	0.37527	5.14068	0.704067	4.08052	0.86301	NA
FBgn0011893	tRNA:Lys-CTT-1-7	2R	6947738	6947810	-	73	0.491696	6.73556	0.799336	10.9498	0.886712	2.35783	0.706864	0.792483	0.37527	5.14068	-0.257723	2.49647	0.917776	NA
FBgn0011894	tRNA:Lys-CTT-1-8	2R	6948284	6948356	-	73	0	0	0	0	NA	NA	NA	NA	0	0	NA	NA	NA	NA
FBgn0011895	tRNA:Lys-CTT-1-9	2R	6949133	6949205	-	73	0	0	0	0	0	4.08046	1	NA	0.37527	5.14068	0.704067	4.08052	0.86301	NA
FBgn0011896	tRNA:Lys-CTT-1-10	2R	13536045	13536117	-	73	0.365555	5.00761	0	0	-1.52465	3.6901	0.679481	NA	0.32456	4.44603	-0.257722	3.69015	0.944321	NA
FBgn0011897	tRNA:Lys-CTT-1-11	2R	19802591	19802663	+	73	0	0	0.222156	3.04323	0.398909	3.89395	0.918405	NA	0.37527	5.14068	0.704068	3.89401	0.856518	NA
FBgn0011902	tRNA:Lys-TTT-1-1	2L	8290727	8290799	+	73	0	0	0	0	0	4.08046	1	NA	0.37527	5.14068	0.704067	4.08052	0.86301	NA
FBgn0011904	tRNA:Lys-TTT-2-4	3R	6822963	6823035	-	73	0	0	0	0	NA	NA	NA	NA	0	0	NA	NA	NA	NA
FBgn0011905	tRNA:Lys-TTT-2-5	3R	12131356	12131427	+	72	0	0	0	0	NA	NA	NA	NA	0	0	NA	NA	NA	NA
FBgn0011906	tRNA:Leu-CAG-1-1	2R	8683215	8683297	+	83	0	0	0	0	NA	NA	NA	NA	0	0	NA	NA	NA	NA
FBgn0011909	tRNA:Leu-CAA-2-1	2R	13430695	13430815	-	83	0	0	0	0	0	3.70715	1	NA	0.684856	8.25128	1.62416	3.65808	0.657048	NA
FBgn0011910	tRNA:Leu-CAA-1-1	2R	13432668	13432794	+	83	0	0	0	0	0	4.08046	1	NA	0.32456	3.91036	0.704067	4.08052	0.86301	NA
FBgn0011915	tRNA:Met-CAT-1-1	2R	11652649	11652721	+	73	0	0	0	0	NA	NA	NA	NA	0	0	NA	NA	NA	NA
FBgn0011916	tRNA:Met-CAT-1-2	2R	11660563	11660635	-	73	0	0	0.253458	3.47202	0.39891	3.98214	0.920206	NA	0.309586	4.24091	0.704067	3.9822	0.859663	NA
FBgn0011919	tRNA:Met-CAT-1-5	3R	6496039	6496111	-	73	0	0	0	0	NA	NA	NA	NA	0	0	NA	NA	NA	NA
FBgn0011921	tRNA:iMet-CAT-2-1	2R	9661225	9661296	+	72	0	0	0	0	NA	NA	NA	NA	0	0	NA	NA	NA	NA
FBgn0011927	tRNA:iMet-CAT-1-4	3L	14673942	14674013	-	72	0	0	0	0	NA	NA	NA	NA	0	0	NA	NA	NA	NA
FBgn0011928	tRNA:iMet-CAT-1-5	3L	14674344	14674415	+	72	0	0	0	0	NA	NA	NA	NA	0	0	NA	NA	NA	NA
FBgn0011931	tRNA:Asn-GTT-1-6	2R	6162519	6162592	+	74	0	0	0	0	NA	NA	NA	NA	0	0	NA	NA	NA	NA
FBgn0011932	tRNA:Asn-GTT-1-5	2R	6162197	6162270	+	74	0	0	0	0	NA	NA	NA	NA	0	0	NA	NA	NA	NA
FBgn0011933	tRNA:Asn-GTT-1-4	2R	6162023	6162096	-	74	0	0	0	0	NA	NA	NA	NA	0	0	NA	NA	NA	NA
FBgn0011934	tRNA:Asn-GTT-1-8	2R	6190372	6190445	+	74	0	0	0	0	NA	NA	NA	NA	0	0	NA	NA	NA	NA
FBgn0011935	tRNA:Asn-GTT-1-7	2R	6190129	6190202	-	74	0	0	0	0	NA	NA	NA	NA	0	0	NA	NA	NA	NA
FBgn0011936	tRNA:Asn-GTT-1-3	2R	6153506	6153579	-	74	0	0	0	0	NA	NA	NA	NA	0	0	NA	NA	NA	NA
FBgn0011937	tRNA:Asn-GTT-1-2	2R	6153186	6153259	+	74	0	0	0	0	NA	NA	NA	NA	0	0	NA	NA	NA	NA
FBgn0011938	tRNA:Asn-GTT-1-1	2R	6152603	6152676	-	74	0	0	0	0	NA	NA	NA	NA	0	0	NA	NA	NA	NA
FBgn0011944	tRNA:Pro-TGG-1-1	3R	17618110	17618181	-	72	0	0	0	0	NA	NA	NA	NA	0	0	NA	NA	NA	NA
FBgn0011945	tRNA:Pro-TGG-1-2	3R	17619961	17620032	+	72	0	0	0	0	NA	NA	NA	NA	0	0	NA	NA	NA	NA
FBgn0011948	tRNA:Arg-TCG-3-1	X	14016203	14016275	+	73	0	0	0	0	NA	NA	NA	NA	0	0	NA	NA	NA	NA
FBgn0011949	tRNA:Arg-TCG-3-2	X	14016808	14016880	+	73	0	0	0	0	NA	NA	NA	NA	0	0	NA	NA	NA	NA
FBgn0011950	tRNA:Arg-TCG-3-3	X	14017010	14017082	+	73	0	0	0	0	NA	NA	NA	NA	0	0	NA	NA	NA	NA
FBgn0011951	tRNA:Arg-TCG-3-4	X	14017212	14017284	+	73	0	0	0	0	NA	NA	NA	NA	0	0	NA	NA	NA	NA
FBgn0011952	tRNA:Arg-TCG-2-1	X	14014814	14014886	+	73	0	0	0	0	NA	NA	NA	NA	0	0	NA	NA	NA	NA
FBgn0011953	tRNA:Arg-TCG-1-1	X	14103719	14103791	-	73	0	0	0	0	NA	NA	NA	NA	0	0	NA	NA	NA	NA
FBgn0011954	tRNA:Arg-TCG-2-2	X	21232091	21232163	+	73	0	0	0	0	NA	NA	NA	NA	0	0	NA	NA	NA	NA
FBgn0011955	tRNA:Arg-ACG-1-5	2R	6178584	6178656	-	73	0	0	0	0	NA	NA	NA	NA	0	0	NA	NA	NA	NA
FBgn0011956	tRNA:Arg-ACG-1-3	2R	6169607	6169679	+	73	0	0	0	0	NA	NA	NA	NA	0	0	NA	NA	NA	NA
FBgn0011957	tRNA:Arg-ACG-1-2	2R	6161535	6161607	+	73	0	0	0	0	NA	NA	NA	NA	0	0	NA	NA	NA	NA
FBgn0011958	tRNA:Arg-ACG-1-1	2R	6142165	6142237	+	73	0	0	0.253458	3.47202	0.398902	4.08046	0.922124	NA	0	0	0	4.08052	1	NA
FBgn0011959	tRNA:Arg-ACG-1-10	3R	8140970	8141042	-	73	0	0	0	0	NA	NA	NA	NA	0	0	NA	NA	NA	NA
FBgn0011960	tRNA:Arg-ACG-1-9	3R	8140727	8140799	-	73	0	0	0	0	NA	NA	NA	NA	0	0	NA	NA	NA	NA
FBgn0011961	tRNA:Arg-ACG-1-8	3R	8140476	8140548	-	73	0	0	0	0	NA	NA	NA	NA	0	0	NA	NA	NA	NA
FBgn0011962	tRNA:Arg-ACG-1-7	3R	8140223	8140295	-	73	0	0	0	0	NA	NA	NA	NA	0	0	NA	NA	NA	NA
FBgn0011963	tRNA:Arg-ACG-1-6	3R	8139951	8140023	-	73	0	0	0	0	NA	NA	NA	NA	0	0	NA	NA	NA	NA
FBgn0011965	tRNA:Arg-TCG-4-1	3R	5388228	5388300	+	73	0	0	0	0	NA	NA	NA	NA	0	0	NA	NA	NA	NA
FBgn0011966	tRNA:Arg-TCG-2-3	3R	8861880	8861952	+	73	0	0	0	0	NA	NA	NA	NA	0	0	NA	NA	NA	NA
FBgn0011970	tRNA:Ser-GCT-2-1	3R	10278054	10278135	-	82	0	0	0	0	NA	NA	NA	NA	0	0	NA	NA	NA	NA
FBgn0011971	tRNA:Ser-GCT-2-2	3R	14044525	14044606	-	82	0	0	0	0	NA	NA	NA	NA	0	0	NA	NA	NA	NA
FBgn0011974	tRNA:Ser-AGA-1-1	X	14070641	14070722	+	82	0	0	0	0	NA	NA	NA	NA	0	0	NA	NA	NA	NA
FBgn0011975	tRNA:Ser-CGA-1-1	X	14015045	14015126	+	82	0	0	0	0	NA	NA	NA	NA	0	0	NA	NA	NA	NA
FBgn0011976	tRNA:Ser-CGA-1-2	X	14015445	14015526	+	82	0	0	0	0	NA	NA	NA	NA	0	0	NA	NA	NA	NA
FBgn0011977	tRNA:Ser-CGA-1-3	X	14103363	14103444	-	82	0	0	0	0	NA	NA	NA	NA	0	0	NA	NA	NA	NA
FBgn0011980	tRNA:Ser-AGA-3-1	X	14025109	14025190	-	82	0	0	0	0	NA	NA	NA	NA	0	0	NA	NA	NA	NA
FBgn0011981	tRNA:Ser-AGA-3-2	X	14104649	14104730	+	82	0	0	0	0	NA	NA	NA	NA	0	0	NA	NA	NA	NA
FBgn0011982	tRNA:Ser-AGA-2-1	X	14025566	14025647	-	82	0.491696	5.99629	0	0	-1.52464	4.08046	0.708668	NA	0	0	-1.21951	4.08052	0.765046	NA
FBgn0011983	tRNA:Ser-AGA-2-2	X	14117729	14117810	-	82	0	0	0	0	NA	NA	NA	NA	0	0	NA	NA	NA	NA
FBgn0011984	tRNA:Ser-AGA-2-4	2L	3173003	3173084	-	82	0	0	0	0	NA	NA	NA	NA	0	0	NA	NA	NA	NA
FBgn0011985	tRNA:Ser-AGA-2-3	2L	3169582	3169663	+	82	0	0	0	0	NA	NA	NA	NA	0	0	NA	NA	NA	NA
FBgn0011986	tRNA:Ser-AGA-2-5	3L	5342084	5342165	+	82	0	0	0	0	NA	NA	NA	NA	0	0	NA	NA	NA	NA
FBgn0011987	tRNA:SeC-TCA-1-1	2R	11357564	11357650	-	87	0	0	0	0	NA	NA	NA	NA	0	0	NA	NA	NA	NA
FBgn0011993	tRNA:Thr-AGT-1-5	3R	17624565	17624638	-	74	0	0	0	0	NA	NA	NA	NA	0	0	NA	NA	NA	NA
FBgn0011994	tRNA:Thr-AGT-1-6	3R	17624806	17624879	-	74	0	0	0	0	NA	NA	NA	NA	0	0	NA	NA	NA	NA
FBgn0011998	tRNA:Val-CAC-2-2	3R	7452060	7452132	+	73	0	0	0.951226	13.0305	2.1403	2.651	0.419461	NA	0.32456	4.44603	0.70407	2.79807	0.801329	NA
FBgn0011999	tRNA:Val-CAC-2-1	3R	7451297	7451369	+	73	0.857251	11.7432	0.963508	13.1987	0.100232	1.69738	0.952911	0.969025	2.37913	32.5908	1.53514	1.59103	0.334611	0.468943
FBgn0012000	tRNA:Val-CAC-2-3	3R	7472060	7472132	-	73	0	0	0	0	NA	NA	NA	NA	0	0	NA	NA	NA	NA
FBgn0012001	tRNA:Val-CAC-2-4	3R	7475903	7475975	-	73	0	0	0	0	NA	NA	NA	NA	0	0	NA	NA	NA	NA
FBgn0012002	tRNA:Val-CAC-1-1	3R	17617761	17617833	+	73	0	0	0	0	0	4.08046	1	NA	0.32456	4.44603	0.704067	4.08052	0.86301	NA
FBgn0012003	tRNA:Val-CAC-2-5	3R	19672277	19672349	-	73	0	0	0	0	NA	NA	NA	NA	0	0	NA	NA	NA	NA
FBgn0012004	tRNA:Val-CAC-2-6	3R	19790122	19790194	+	73	0	0	0	0	NA	NA	NA	NA	0	0	NA	NA	NA	NA
FBgn0012009	tRNA:Val-AAC-2-4	3L	13433646	13433718	-	73	0	0	0	0	NA	NA	NA	NA	0	0	NA	NA	NA	NA
FBgn0012010	tRNA:Val-AAC-2-3	3L	13433048	13433120	+	73	0	0	0	0	NA	NA	NA	NA	0	0	NA	NA	NA	NA
FBgn0012011	tRNA:Val-AAC-1-1	3R	16321690	16321762	+	73	0	0	0	0	NA	NA	NA	NA	0	0	NA	NA	NA	NA
FBgn0012016	tRNA:Tyr-GTA-1-3	2L	2462593	2462686	+	73	0	0	0	0	NA	NA	NA	NA	0	0	NA	NA	NA	NA
FBgn0012017	tRNA:Tyr-GTA-1-2	2L	2459924	2460044	-	73	0	0	0	0	NA	NA	NA	NA	0	0	NA	NA	NA	NA
FBgn0012018	tRNA:Tyr-GTA-1-9	2L	7711476	7711661	+	73	0	0	0	0	NA	NA	NA	NA	0	0	NA	NA	NA	NA
FBgn0012024	tRNA:Tyr-GTA-1-8	3R	8669081	8669174	-	73	0	0	0	0	NA	NA	NA	NA	0	0	NA	NA	NA	NA
FBgn0012025	tRNA:Tyr-GTA-1-7	3R	8668612	8668705	-	73	0	0	0	0	NA	NA	NA	NA	0	0	NA	NA	NA	NA
FBgn0012026	tRNA:Tyr-GTA-1-6	3R	8668116	8668208	-	73	0	0	0	0	NA	NA	NA	NA	0	0	NA	NA	NA	NA
FBgn0012027	tRNA:Tyr-GTA-1-5	3R	8642701	8642793	-	73	0	0	0	0	NA	NA	NA	NA	0	0	NA	NA	NA	NA
FBgn0012028	tRNA:Tyr-GTA-1-4	3R	8642333	8642425	-	73	0	0	0	0	NA	NA	NA	NA	0	0	NA	NA	NA	NA
FBgn0012034	AcCoAS	3L	21270722	21280243	-	3605	239.123	66.331	192.596	53.4247	-0.30892	0.142322	0.0299642	0.0601712	146.367	40.6011	-0.700255	0.148539	2.42547e-06	1.1331e-05
FBgn0012036	Aldh	2L	9387389	9391567	+	2070	6270.04	3029	5746.44	2776.06	-0.124933	0.0628094	0.0466918	0.0885479	6496	3138.17	0.0515457	0.0628708	0.412292	0.548104
FBgn0012037	Ance	2L	13905645	13909212	+	2183	8.39132	3.84394	2.18721	1.00193	-1.86073	0.911591	0.0412322	0.07956	0.994443	0.455539	-3.06574	1.13261	0.00679375	0.0173637
FBgn0012042	AttA	2R	14747362	14748215	+	790	0.724079	0.916556	0.729071	0.922874	0.00131607	2.14084	0.99951	1	0.37527	0.475025	-1.07095	2.28503	0.639296	0.749468
FBgn0012051	CalpA	2R	19425113	19430564	+	3440	1638.92	476.432	816.893	237.469	-1.00448	0.091904	8.31461e-28	1.56484e-26	825.13	239.863	-0.991813	0.0927043	1.03254e-26	2.4244e-25
FBgn0012058	Cdc27	3L	7245481	7249340	-	3713	957.07	257.762	1243.92	335.016	0.376909	0.0733033	2.72161e-07	1.23426e-06	1349.57	363.473	0.496269	0.0736973	1.65187e-11	1.36834e-10
FBgn0012344	Dh44	3R	9638182	9650706	+	2402	1.45519	0.605824	1.17338	0.488502	-0.297418	1.84325	0.871814	0.91437	0	0	-3.02019	2.07818	0.146145	0.245602
FBgn0013263	Trl	3L	14747929	14761049	-	6254	186.446	29.8123	364.625	58.3027	0.966847	0.116542	1.07533e-16	1.03588e-15	343.446	54.9162	0.879647	0.118558	1.17503e-13	1.18121e-12
FBgn0013269	Fkbp39	3R	15331584	15333133	-	1299	2600.87	2002.21	8572.8	6599.53	1.72128	0.106949	2.79208e-58	1.50844e-56	6278.52	4833.35	1.27136	0.107156	1.8073e-32	5.7166e-31
FBgn0013272	Gp150	2R	22317662	22329416	+	4916	23870.2	4855.62	23884.2	4858.47	0.000842762	0.0547379	0.987716	0.992599	16983	3454.64	-0.491206	0.0548941	3.61152e-19	5.46792e-18
FBgn0013275	Hsp70Aa	3R	11954163	11956544	-	2382	1.34192	0.563357	0	0	-3.13188	2.83419	0.269143	NA	0	0	-2.82674	2.83421	0.318588	NA
FBgn0013276	Hsp70Ab	3R	11958535	11960909	+	2375	3.90664	1.6449	0.697769	0.293797	-2.32569	1.43094	0.104102	0.175949	0.309586	0.130352	-3.3992	1.64101	0.0383207	0.0797237
FBgn0013277	Hsp70Ba	3R	12465453	12467776	-	2324	1.44816	0.623132	0.253458	0.109061	-2.36103	2.03627	0.246259	0.357788	0.69983	0.301132	-1.13021	1.94382	0.560947	0.681925
FBgn0013278	Hsp70Bb	3R	12505793	12508139	+	2347	6.04492	2.57559	0.253458	0.107992	-4.39533	1.48592	0.00309669	0.00772501	1.00942	0.430088	-2.61093	1.23053	0.0338547	0.0714717
FBgn0013279	Hsp70Bc	3R	12509076	12511461	+	2386	1.70747	0.715621	0	0	-3.48816	2.39188	0.144749	0.232215	0	0	-3.18301	2.3919	0.183272	NA
FBgn0013300	ProtA	2L	14879050	14881652	-	683	0	0	0	0	NA	NA	NA	NA	0	0	NA	NA	NA	NA
FBgn0013301	ProtB	2L	14882101	14883721	-	679	0	0	0	0	NA	NA	NA	NA	0	0	NA	NA	NA	NA
FBgn0013303	Nca	3L	19991887	19997568	+	899	113.053	125.754	125.91	140.055	0.15847	0.175089	0.365422	0.487501	157.674	175.388	0.479567	0.174878	0.0061012	0.0157518
FBgn0013305	Nmda1	2R	12877094	12880230	-	2590	1588.02	613.137	821.23	317.077	-0.950588	0.0688828	2.54568e-43	8.82994e-42	999.171	385.78	-0.668705	0.0689295	2.97688e-22	5.54717e-21
FBgn0013307	Odc1	2R	8004824	8006672	+	1253	0	0	0	0	NA	NA	NA	NA	0	0	NA	NA	NA	NA
FBgn0013308	Odc2	2R	8007246	8009062	+	1268	0	0	0	0	NA	NA	NA	NA	0	0	NA	NA	NA	NA
FBgn0013323	Ptth	2L	575711	576896	-	1128	70.8849	62.8412	33.9681	30.1135	-1.06541	0.249867	2.009e-05	7.11162e-05	44.5641	39.5071	-0.662206	0.247675	0.00750225	0.0189599
FBgn0013325	RpL11	2R	19442342	19443825	+	1017	9340.97	9184.83	11935.7	11736.2	0.35384	0.0669254	1.24287e-07	5.85322e-07	13774.5	13544.3	0.560663	0.0669448	5.52251e-17	7.16988e-16
FBgn0013334	Sap47	3R	15935100	15962124	+	6401	1251.45	195.508	750.831	117.299	-0.740272	0.0831117	5.24548e-19	5.83897e-18	903.05	141.079	-0.47034	0.0831825	1.56469e-08	9.59886e-08
FBgn0013342	nSyb	3L	1630348	1637752	-	4072	12.8619	3.15863	21.1811	5.20164	0.70644	0.433783	0.103407	0.17498	17.4093	4.27537	0.432767	0.448529	0.334616	0.468943
FBgn0013343	Syx1A	3R	24101600	24105763	-	4164	3774.15	906.376	4019.96	965.409	0.0895701	0.0652406	0.169777	0.265347	4112.09	987.533	0.122607	0.065449	0.0610241	0.119239
FBgn0013347	TfIIA-S	3R	23890388	23891060	-	617	1118.92	1813.48	1364.73	2211.89	0.282602	0.0773299	0.000257684	0.000771156	1471.75	2385.33	0.393987	0.077684	3.94357e-07	2.03046e-06
FBgn0013348	TpnC41C	2R	5065237	5070210	-	1880	1.70747	0.90823	0.253458	0.134818	-2.5003	1.772	0.158243	0.250346	1.70925	0.909173	0.0374755	1.4713	0.979679	0.986275
FBgn0013432	bcn92	X	2148463	2149647	-	748	886.292	1184.88	802.907	1073.4	-0.140737	0.0773726	0.0689178	0.123791	930.468	1243.94	0.0716887	0.0776372	0.355809	0.49041
FBgn0013433	beat-Ia	2L	16049965	16081684	+	2870	0	0	0	0	0	4.08046	1	NA	0.309586	0.10787	0.704067	4.08052	0.86301	NA
FBgn0013435	Cdc2rk	2R	10067217	10068702	-	1251	83.971	67.1231	105.926	84.6733	0.345228	0.183937	0.0605344	0.110949	119.398	95.4417	0.50751	0.185368	0.00618408	0.0159285
FBgn0013467	igl	2R	15155437	15190292	+	2894	0	0	0	0	NA	NA	NA	NA	0	0	NA	NA	NA	NA
FBgn0013469	klu	3L	10981171	11009188	-	4792	76.4042	15.9441	24.0974	5.02866	-1.65824	0.271075	9.51969e-10	5.41099e-09	36.9147	7.7034	-1.04647	0.262832	6.84759e-05	0.000259383
FBgn0013531	MED20	2L	8071812	8072848	-	1037	23.1779	22.3509	46.4657	44.8078	1.00888	0.308003	0.00105451	0.00286781	44.7485	43.1519	0.946954	0.313575	0.00252884	0.00713737
FBgn0013548	l(2)dtl	2R	23702477	23705403	+	2653	337.094	127.061	549.223	207.02	0.699359	0.0998432	2.47741e-12	1.75212e-11	477.927	180.146	0.502619	0.101928	8.1751e-07	4.02554e-06
FBgn0013563	Pex1	3L	14071892	14076123	+	3275	224.287	68.4846	190.405	58.1389	-0.237345	0.141582	0.0936652	0.161069	164.393	50.1964	-0.451069	0.145981	0.00200214	0.00578227
FBgn0013576	mtd	3R	5270116	5350443	-	13741	3139.34	228.465	2907.9	211.622	-0.111764	0.0801026	0.162937	0.256495	2352.43	171.198	-0.415572	0.0807213	2.62951e-07	1.38621e-06
FBgn0013672	mt:ATPase6	mitochondrion_genome	4062	4736	+	675	0	0	0	0	NA	NA	NA	NA	0	0	NA	NA	NA	NA
FBgn0013673	mt:ATPase8	mitochondrion_genome	3907	4068	+	162	0	0	0	0	NA	NA	NA	NA	0	0	NA	NA	NA	NA
FBgn0013674	mt:CoI	mitochondrion_genome	1474	3009	+	1536	0	0	0	0	NA	NA	NA	NA	0	0	NA	NA	NA	NA
FBgn0013675	mt:CoII	mitochondrion_genome	3083	3767	+	685	0	0	0	0	NA	NA	NA	NA	0	0	NA	NA	NA	NA
FBgn0013676	mt:CoIII	mitochondrion_genome	4736	5524	+	789	0	0	0	0	NA	NA	NA	NA	0	0	NA	NA	NA	NA
FBgn0013678	mt:Cyt-b	mitochondrion_genome	10499	11635	+	1137	0	0	0	0	NA	NA	NA	NA	0	0	NA	NA	NA	NA
FBgn0013679	mt:ND1	mitochondrion_genome	11721	12659	-	939	0	0	0	0	NA	NA	NA	NA	0	0	NA	NA	NA	NA
FBgn0013680	mt:ND2	mitochondrion_genome	240	1263	+	1024	0	0	0	0	NA	NA	NA	NA	0	0	NA	NA	NA	NA
FBgn0013681	mt:ND3	mitochondrion_genome	5608	5961	+	354	0	0	0	0	NA	NA	NA	NA	0	0	NA	NA	NA	NA
FBgn0013683	mt:ND4L	mitochondrion_genome	9545	9835	-	291	0	0	0	0	NA	NA	NA	NA	0	0	NA	NA	NA	NA
FBgn0013684	mt:ND5	mitochondrion_genome	6409	8125	-	1717	0	0	0	0	NA	NA	NA	NA	0	0	NA	NA	NA	NA
FBgn0013685	mt:ND6	mitochondrion_genome	9971	10495	+	525	0	0	0	0	NA	NA	NA	NA	0	0	NA	NA	NA	NA
FBgn0013686	mt:lrRNA	mitochondrion_genome	12735	14058	-	1324	0	0	0	0	NA	NA	NA	NA	0	0	NA	NA	NA	NA
FBgn0013688	mt:srRNA	mitochondrion_genome	14131	14916	-	786	0	0	0	0	NA	NA	NA	NA	0	0	NA	NA	NA	NA
FBgn0013689	mt:tRNA:Ala-TGC	mitochondrion_genome	5983	6047	+	65	0	0	0	0	NA	NA	NA	NA	0	0	NA	NA	NA	NA
FBgn0013690	mt:tRNA:Cys-GCA	mitochondrion_genome	1322	1383	-	62	0	0	0	0	NA	NA	NA	NA	0	0	NA	NA	NA	NA
FBgn0013691	mt:tRNA:Asp-GTC	mitochondrion_genome	3840	3906	+	67	0	0	0	0	NA	NA	NA	NA	0	0	NA	NA	NA	NA
FBgn0013692	mt:tRNA:Glu-TTC	mitochondrion_genome	6259	6325	+	67	0	0	0	0	NA	NA	NA	NA	0	0	NA	NA	NA	NA
FBgn0013693	mt:tRNA:Phe-GAA	mitochondrion_genome	6344	6408	-	65	0	0	0	0	NA	NA	NA	NA	0	0	NA	NA	NA	NA
FBgn0013694	mt:tRNA:Gly-TCC	mitochondrion_genome	5543	5607	+	65	0	0	0	0	NA	NA	NA	NA	0	0	NA	NA	NA	NA
FBgn0013695	mt:tRNA:His-GTG	mitochondrion_genome	8141	8206	-	66	0	0	0	0	NA	NA	NA	NA	0	0	NA	NA	NA	NA
FBgn0013696	mt:tRNA:Ile-GAT	mitochondrion_genome	1	65	+	65	0	0	0	0	NA	NA	NA	NA	0	0	NA	NA	NA	NA
FBgn0013697	mt:tRNA:Lys-CTT	mitochondrion_genome	3768	3838	+	71	0	0	0	0	NA	NA	NA	NA	0	0	NA	NA	NA	NA
FBgn0013698	mt:tRNA:Leu-TAG	mitochondrion_genome	12670	12734	-	65	0	0	0	0	NA	NA	NA	NA	0	0	NA	NA	NA	NA
FBgn0013699	mt:tRNA:Leu-TAA	mitochondrion_genome	3012	3077	+	66	0	0	0	0	NA	NA	NA	NA	0	0	NA	NA	NA	NA
FBgn0013700	mt:tRNA:Met-CAT	mitochondrion_genome	171	239	+	69	0	0	0	0	NA	NA	NA	NA	0	0	NA	NA	NA	NA
FBgn0013701	mt:tRNA:Asn-GTT	mitochondrion_genome	6126	6190	+	65	0	0	0	0	NA	NA	NA	NA	0	0	NA	NA	NA	NA
FBgn0013702	mt:tRNA:Pro-TGG	mitochondrion_genome	9904	9964	-	61	0	0	0	0	NA	NA	NA	NA	0	0	NA	NA	NA	NA
FBgn0013703	mt:tRNA:Gln-TTG	mitochondrion_genome	97	165	-	69	0	0	0	0	NA	NA	NA	NA	0	0	NA	NA	NA	NA
FBgn0013704	mt:tRNA:Arg-TCG	mitochondrion_genome	6062	6125	+	64	0	0	0	0	NA	NA	NA	NA	0	0	NA	NA	NA	NA
FBgn0013705	mt:tRNA:Ser-GCT	mitochondrion_genome	6191	6258	+	68	0	0	0	0	NA	NA	NA	NA	0	0	NA	NA	NA	NA
FBgn0013706	mt:tRNA:Ser-TGA	mitochondrion_genome	11638	11703	+	66	0	0	0	0	NA	NA	NA	NA	0	0	NA	NA	NA	NA
FBgn0013707	mt:tRNA:Thr-TGT	mitochondrion_genome	9838	9903	+	66	0	0	0	0	NA	NA	NA	NA	0	0	NA	NA	NA	NA
FBgn0013708	mt:tRNA:Val-TAC	mitochondrion_genome	14058	14130	-	73	0	0	0	0	NA	NA	NA	NA	0	0	NA	NA	NA	NA
FBgn0013709	mt:tRNA:Trp-TCA	mitochondrion_genome	1264	1329	+	66	0	0	0	0	NA	NA	NA	NA	0	0	NA	NA	NA	NA
FBgn0013710	mt:tRNA:Tyr-GTA	mitochondrion_genome	1403	1468	-	66	0	0	0	0	NA	NA	NA	NA	0	0	NA	NA	NA	NA
FBgn0013717	not	3L	18618305	18622129	-	2989	348.185	116.489	355.866	119.059	0.0344698	0.109963	0.753925	0.829596	376.693	126.026	0.112744	0.111135	0.310357	0.443328
FBgn0013718	nuf	3L	14190870	14233250	+	5594	793.005	141.76	99.4248	17.7735	-3.00553	0.128002	6.47174e-122	1.1539e-119	188.796	33.7498	-2.06691	0.119851	1.206e-66	1.40917e-64
FBgn0013720	pck	X	1470666	1472325	+	1478	504.318	341.217	367.58	248.701	-0.460702	0.100968	5.04621e-06	1.9426e-05	420.521	284.52	-0.261593	0.101502	0.00995981	0.0244068
FBgn0013725	phyl	2R	14427336	14432337	-	1839	5.13648	2.79308	57.0344	31.0138	3.55892	0.488133	3.07922e-13	2.34062e-12	43.4271	23.6145	3.17877	0.494222	1.2605e-10	9.64504e-10
FBgn0013726	pnut	2R	8237271	8240297	+	3027	4688.81	1549	4627.78	1528.83	-0.019778	0.0639843	0.75724	0.832251	4726.67	1561.5	0.0105461	0.0641708	0.86946	0.913904
FBgn0013732	sced	2R	6657326	6660624	+	3299	172.502	52.2893	187.206	56.7463	0.115706	0.145807	0.427455	0.549203	185.589	56.2562	0.105744	0.148254	0.475681	0.608273
FBgn0013733	shot	2R	13864237	13942110	-	30414	11096.3	364.841	9738.94	320.213	-0.188839	0.0807762	0.0193975	0.0410361	7382.7	242.74	-0.588134	0.0809969	3.83687e-13	3.67836e-12
FBgn0013746	alien	2L	8993818	8997379	-	3235	817.725	252.774	1024.28	316.625	0.327394	0.0806611	4.93079e-05	0.00016533	951.415	294.1	0.218568	0.0817545	0.0075071	0.0189673
FBgn0013749	Arf102F	4	1124167	1125325	+	930	228.808	246.031	303.731	326.592	0.413464	0.127706	0.00120527	0.00324395	317.617	341.524	0.476126	0.128973	0.000222792	0.000770196
FBgn0013750	Arf51F	2R	15322501	15325490	+	2196	1069.37	486.963	1966.49	895.487	0.878648	0.0723915	6.68796e-34	1.62997e-32	1729.09	787.382	0.695112	0.0731648	2.0863e-21	3.70682e-20
FBgn0013751	Awh	3L	3846206	3861692	+	2104	1.21578	0.57784	0	0	-3.01429	2.70046	0.264331	NA	0	0	-2.70914	2.70048	0.315761	NA
FBgn0013753	Bgb	3L	1639711	1640952	+	1242	134.077	107.953	160.92	129.565	0.26936	0.150451	0.0733972	0.130682	177.616	143.008	0.408375	0.151815	0.0071463	0.018148
FBgn0013755	Bro	3L	1647869	1648612	+	744	0	0	0	0	NA	NA	NA	NA	0	0	NA	NA	NA	NA
FBgn0013756	Mtor	2R	11852617	11861202	+	7780	6297.59	809.459	8385.81	1077.87	0.412844	0.0827131	5.99822e-07	2.60958e-06	7623.91	979.937	0.275338	0.0828531	0.000889876	0.00274992
FBgn0013759	CASK	3R	21783400	21822674	-	8504	3011.12	354.082	2877.78	338.404	-0.066018	0.0775663	0.394705	0.516731	2659.43	312.727	-0.180346	0.0779749	0.0207293	0.0468023
FBgn0013762	Cdk5	2R	15569528	15571417	-	1604	151.534	94.4728	113.785	70.9382	-0.401931	0.168867	0.017305	0.0370645	124.845	77.8332	-0.285176	0.170816	0.0950198	0.173163
FBgn0013763	Idgf6	2R	16691022	16693751	+	1811	5442.96	3005.5	6579.66	3633.16	0.273992	0.0782576	0.000463238	0.00133823	6929.44	3826.3	0.348716	0.0783442	8.54381e-06	3.71366e-05
FBgn0013764	Chi	2R	24031538	24033943	-	2246	548.838	244.362	830.438	369.741	0.595464	0.0923559	1.13717e-10	6.97046e-10	763.447	339.914	0.478136	0.0935652	3.21834e-07	1.67969e-06
FBgn0013765	cnn	2R	13439314	13450475	-	6196	2432.68	392.621	2648.87	427.512	0.121598	0.0596792	0.0415969	0.0801461	3043.62	491.224	0.32316	0.0597905	6.48548e-08	3.70407e-07
FBgn0013767	Crz	3R	14314854	14315716	+	654	0	0	0	0	0	3.44733	1	NA	1.12581	1.72142	2.32707	3.33574	0.485417	NA
FBgn0013770	Cp1	2R	13960675	13967981	+	2066	7099.01	3436.12	5385.87	2606.91	-0.398598	0.0650815	9.09133e-10	5.17331e-09	5019.89	2429.76	-0.499693	0.0653318	2.03264e-14	2.16147e-13
FBgn0013771	Cyp6a9	2R	14879356	14881372	-	1964	32.7838	16.6923	6.09461	3.10316	-2.4135	0.468505	2.58424e-07	1.17616e-06	12.8597	6.5477	-1.32968	0.425989	0.00179995	0.00524103
FBgn0013772	Cyp6a8	2R	14887171	14889010	-	1781	0	0	0.222156	0.124736	0.398909	3.89395	0.918405	NA	0.37527	0.210707	0.704068	3.89401	0.856518	NA
FBgn0013773	Cyp6a22	2R	14871366	14873705	+	2165	152.099	70.2537	50.4252	23.2911	-1.60142	0.195316	2.42191e-16	2.26856e-15	142.193	65.678	-0.0899196	0.178143	0.613727	0.727304
FBgn0013799	Deaf1	3L	19818174	19830686	+	3698	1109.06	299.909	1318.02	356.413	0.246502	0.0723488	0.000656486	0.0018497	1383.38	374.089	0.317818	0.0728382	1.28094e-05	5.40683e-05
FBgn0013810	Dhc36C	2L	17501401	17525515	+	12202	1492.68	122.331	2609.44	213.853	0.805296	0.0700449	1.3682e-30	2.94599e-29	1950.8	159.876	0.384425	0.0710291	6.22512e-08	3.56151e-07
FBgn0013811	Dhc62B	3L	1759172	1771758	-	12090	49.0186	4.05447	46.0293	3.80722	-0.0940645	0.308146	0.760169	0.833847	41.3919	3.42364	-0.266637	0.315641	0.398252	0.534375
FBgn0013812	Dhc93AB	3R	21024580	21042499	-	14010	1.5743	0.11237	0	0	-3.39722	2.20631	0.123616	0.20322	0.32456	0.0231663	-2.13028	2.20633	0.334279	0.468668
FBgn0013813	Dhc98D	3R	28486953	28519398	+	15919	3.2888	0.206596	0	0	-4.44119	1.7034	0.00912732	0.0207658	0.943733	0.0592834	-1.73754	1.49306	0.244528	0.367643
FBgn0013949	Elal	3R	24865350	24867651	+	2135	0	0	0.253458	0.118715	0.398902	4.08046	0.922124	NA	0	0	0	4.08052	1	NA
FBgn0013953	Esp	3R	24841935	24850412	+	2907	1535.41	528.178	501.204	172.413	-1.61526	0.08682	2.94335e-77	2.43197e-75	618.475	212.754	-1.31172	0.0867818	1.28685e-51	8.75409e-50
FBgn0013954	Fkbp12	2R	19290109	19290962	+	633	6708.99	10598.7	11576.5	18288.3	0.787334	0.068984	3.58908e-30	7.58332e-29	12039.6	19019.9	0.844302	0.0690449	2.19466e-34	7.70225e-33
FBgn0013972	Gycalpha99B	3R	29682503	29685758	+	2354	0	0	0	0	NA	NA	NA	NA	0	0	NA	NA	NA	NA
FBgn0013973	Gycbeta100B	3R	31134392	31178278	+	4066	5.44698	1.33964	1.9537	0.480496	-1.53547	0.957828	0.108917	0.182873	3.35281	0.824596	-0.714092	0.91026	0.432751	0.568454
FBgn0013981	His4r	3R	14625755	14626614	+	796	10918.1	13716.2	10371.1	13029	-0.07389	0.0630126	0.240947	0.351327	9880.49	12412.7	-0.143497	0.0631343	0.0230332	0.0511781
FBgn0013983	imd	2R	18409796	18413599	-	1518	131.491	86.6214	97.786	64.4177	-0.422415	0.179367	0.0185209	0.0393865	97.1513	63.9995	-0.435966	0.183235	0.0173472	0.0398547
FBgn0013987	MAPk-Ak2	X	5759908	5764203	-	2198	1736.22	789.908	1632.46	742.705	-0.0870189	0.080406	0.279144	0.395723	1366.8	621.838	-0.345227	0.081401	2.22464e-05	9.01841e-05
FBgn0013995	Calx	3R	20978183	21015613	+	8959	0.724079	0.0808215	0.222156	0.0247969	-1.36171	2.60899	0.60172	NA	0.309586	0.0345559	-1.05655	2.60901	0.685506	NA
FBgn0013997	Nrx-IV	3L	12146519	12156990	+	5137	1671.9	325.462	1446.05	281.497	-0.21122	0.0683754	0.00200751	0.00519539	1437.74	279.879	-0.219599	0.0690359	0.00146799	0.00436791
FBgn0014000	Hf	2L	19966727	19967685	-	896	0.365555	0.407986	0	0	-1.52464	4.08046	0.708668	NA	0	0	-1.21951	4.08052	0.765046	NA
FBgn0014006	Ask1	3R	19879719	19886030	+	5168	528.781	102.318	485.731	93.9882	-0.122312	0.0981668	0.21278	0.317966	453.651	87.7809	-0.224733	0.100033	0.0246663	0.0543325
FBgn0014007	Ptp69D	3L	12734945	12741568	+	5168	925.884	179.157	1225.81	237.191	0.403394	0.078258	2.54082e-07	1.15847e-06	1013.03	196.02	0.126761	0.0796759	0.111618	0.197927
FBgn0014009	Rab2	2R	6696739	6699469	+	1712	3158.43	1844.88	4503.15	2630.34	0.512741	0.058421	1.68399e-18	1.83041e-17	3678.22	2148.49	0.22089	0.0589549	0.000179128	0.000627328
FBgn0014010	Rab5	2L	2359142	2365273	-	3146	6854.32	2178.74	5126.42	1629.51	-0.419599	0.0678963	6.41045e-10	3.72069e-09	5032.58	1599.68	-0.445748	0.0680938	5.90649e-11	4.67437e-10
FBgn0014011	Rac2	3L	7432762	7435190	-	2429	2008.4	826.841	1814.1	746.849	-0.149362	0.0741994	0.0441169	0.0841901	1706.6	702.595	-0.235914	0.0748269	0.00161712	0.00475747
FBgn0014018	Rel	3R	9044183	9047977	-	3499	1053.89	301.196	681.817	194.86	-0.626572	0.0900363	3.42452e-12	2.38543e-11	708.064	202.362	-0.576219	0.0908756	2.28651e-10	1.69855e-09
FBgn0014019	Rh5	2L	12008153	12009832	+	1572	1.46222	0.930166	0.475613	0.302553	-1.56555	1.86805	0.401992	0.524111	1.57788	1.00374	0.087933	1.68399	0.958356	0.972952
FBgn0014020	Rho1	2R	16102687	16107229	+	2385	30381.7	12738.7	27488.3	11525.5	-0.144526	0.0691592	0.03664	0.071699	24964.5	10467.3	-0.283412	0.0692105	4.22309e-05	0.000165198
FBgn0014022	Rlb1	3R	9513327	9514827	+	1444	637.699	441.62	798.609	553.054	0.321141	0.0955393	0.000775635	0.00215671	666.971	461.891	0.0634285	0.0972548	0.51428	0.641848
FBgn0014023	mRpL47	3R	9514822	9515908	-	905	115.176	127.266	136.012	150.289	0.258205	0.173539	0.136783	0.22157	117.685	130.039	0.0398136	0.178604	0.823601	0.885474
FBgn0014024	Rnp4F	X	5318928	5322696	-	3323	1287.09	387.327	2250.26	677.177	0.803976	0.0674509	9.37484e-33	2.15558e-31	1987.3	598.043	0.625225	0.0681671	4.64585e-20	7.51507e-19
FBgn0014026	RpL7A	X	6530897	6533348	-	1315	2727.82	2074.39	2541.25	1932.51	-0.100639	0.0937691	0.283153	0.400012	3251.4	2472.55	0.253192	0.093712	0.00689624	0.0175985
FBgn0014028	SdhB	2R	6807626	6809172	+	1219	1487.44	1220.21	1040.47	853.544	-0.512629	0.0738178	3.79768e-12	2.62915e-11	1257.98	1031.97	-0.239885	0.0738659	0.00116392	0.00352119
FBgn0014029	44441	3R	20586129	20588356	-	1688	1207.35	715.253	1218.67	721.961	0.0155433	0.0740517	0.833747	0.886614	1216.89	720.905	0.0129776	0.0747605	0.862189	0.90992
FBgn0014031	Spat	X	6528948	6530726	+	1410	11.7582	8.33918	4.17987	2.96445	-1.48626	0.657635	0.0238213	0.0492672	5.8633	4.15837	-1.03496	0.647934	0.110195	0.195791
FBgn0014032	Sptr	X	8463296	8464438	-	1143	72.2807	63.2377	36.4507	31.8904	-0.974959	0.249316	9.20894e-05	0.00029636	53.3726	46.6952	-0.425011	0.24442	0.0820597	0.153112
FBgn0014033	Sr-CI	2L	4121702	4124153	+	2202	18.469	8.38738	6.41067	2.91129	-1.51988	0.461603	0.000992608	0.00271179	32.6317	14.8191	0.826989	0.3833	0.0309628	0.0661054
FBgn0014037	Su(Tpl)	3L	19889120	19909410	-	6626	12672.7	1912.57	11176.3	1686.73	-0.181811	0.0736858	0.0136107	0.0297923	13088.9	1975.38	0.0463189	0.0736992	0.529685	0.655147
FBgn0014073	Tie	3L	4510698	4532145	-	5236	59.5633	11.3757	6.19155	1.1825	-3.24229	0.462023	2.25721e-12	1.60196e-11	8.50324	1.624	-2.79172	0.45305	7.18031e-10	5.07218e-09
FBgn0014075	Uggt	3L	18872747	18878245	+	5316	815.918	153.484	863.378	162.411	0.0818539	0.0798151	0.305106	0.423532	1048.1	197.159	0.361448	0.0798515	5.99684e-06	2.66968e-05
FBgn0014076	Vm32E	2L	11171167	11171665	-	499	0	0	0	0	NA	NA	NA	NA	0	0	NA	NA	NA	NA
FBgn0014092	CG4278	2L	16327069	16328131	+	1063	174.441	164.103	199.855	188.011	0.197452	0.137694	0.151574	0.241562	189.018	177.816	0.116164	0.140756	0.409208	0.545172
FBgn0014127	barr	2L	20058163	20061370	-	2908	817.629	281.165	980.634	337.22	0.261288	0.0785777	0.000883495	0.00243003	782.276	269.008	-0.0641404	0.0805286	0.425746	0.561257
FBgn0014133	bif	X	11678970	11694740	+	8842	2697.5	305.078	2985.86	337.691	0.145896	0.0572808	0.0108644	0.0242671	2497.15	282.419	-0.111203	0.0580436	0.0553844	0.109708
FBgn0014135	bnl	3R	19794073	19836817	-	4559	1375.41	301.691	2336.02	512.398	0.761552	0.067254	1.00357e-29	2.08575e-28	3601.8	790.042	1.38767	0.0668706	1.18531e-95	2.67556e-93
FBgn0014141	cher	3R	17091533	17125389	-	9428	4229.36	448.595	6472.02	686.468	0.612988	0.0630674	2.48865e-22	3.44111e-21	7041.61	746.883	0.734716	0.063151	2.75948e-31	8.33043e-30
FBgn0014143	croc	3L	21474133	21476479	-	2347	0	0	0	0	NA	NA	NA	NA	0	0	NA	NA	NA	NA
FBgn0014163	fax	3L	16402796	16411828	-	4167	3986.59	956.705	2098.66	503.637	-0.92769	0.112303	1.4498e-16	1.38351e-15	1759.53	422.252	-1.17991	0.112851	1.38303e-25	3.07989e-24
FBgn0014179	gcm	2L	9579498	9581745	-	2173	4.03981	1.85909	0	0	-4.71361	1.77144	0.00779357	0.0179891	0.37527	0.172697	-3.44666	1.77145	0.0516945	0.103431
FBgn0014184	Oda	2R	12166295	12174264	-	2445	4575.28	1871.28	5145.63	2104.55	0.17028	0.0672982	0.0113988	0.0253656	5755.96	2354.17	0.331951	0.0673715	8.34307e-07	4.09809e-06
FBgn0014189	Hel25E	2L	5539326	5542314	-	2460	2391.27	972.062	4835.7	1965.73	1.01771	0.071672	9.21472e-46	3.49437e-44	3918.83	1593.02	0.713454	0.0720879	4.28917e-23	8.33661e-22
FBgn0014269	prod	2R	18969404	18971133	-	1597	543.542	340.352	856.875	536.553	0.654007	0.0837738	5.86511e-15	5.05574e-14	814.751	510.176	0.58253	0.0849054	6.84153e-12	5.90357e-11
FBgn0014340	mof	X	5873840	5876853	-	3014	634.304	210.452	829.739	275.295	0.385038	0.0854859	6.66499e-06	2.51527e-05	910.865	302.211	0.52196	0.0859407	1.25159e-09	8.63852e-09
FBgn0014342	mia	3R	5548115	5551168	-	2590	67.8542	26.1985	57.661	22.2629	-0.235514	0.215804	0.275125	0.391775	76.89	29.6873	0.184567	0.214022	0.388481	0.524025
FBgn0014343	mirr	3L	12693639	12710249	+	3892	7.52001	1.93217	1.23599	0.317571	-2.52877	1.02709	0.0138134	0.030197	2.86115	0.735135	-1.35896	0.928398	0.143257	0.241854
FBgn0014366	noi	3R	5589601	5591459	-	1859	435.741	234.396	614.627	330.622	0.497553	0.097518	3.35794e-07	1.51164e-06	536.313	288.496	0.296723	0.099432	0.00284336	0.00793044
FBgn0014368	nol	3L	11130835	11131402	+	568	9.46689	16.6671	12.3411	21.7273	0.385282	0.514493	0.453943	0.574095	19.0248	33.4944	0.993156	0.50594	0.0496475	0.0998175
FBgn0014380	RhoL	3R	9497101	9502581	-	1412	191.171	135.391	302.263	214.067	0.658239	0.134733	1.03156e-06	4.33929e-06	126.915	89.8828	-0.591896	0.147503	6.00096e-05	0.000229767
FBgn0014388	sty	3L	3401153	3424935	-	5438	7341.94	1350.12	9950.25	1829.76	0.437836	0.0644883	1.1261e-11	7.46058e-11	7990.38	1469.36	0.121855	0.0647185	0.0597214	0.117154
FBgn0014391	sun	X	15847859	15849258	-	450	368.828	819.619	438.728	974.951	0.259288	0.128027	0.042841	0.0821652	487.201	1082.67	0.405703	0.128557	0.00160039	0.00471805
FBgn0014395	tilB	X	22449737	22451463	+	1358	38.1371	28.0833	8.61016	6.34032	-2.16909	0.428072	4.03875e-07	1.79396e-06	20.1222	14.8175	-0.928455	0.389895	0.017252	0.0396544
FBgn0014396	tim	2L	3493986	3508119	-	6181	2.066	0.334249	0.608483	0.098444	-1.84922	1.72084	0.282555	0.399333	0.75054	0.121427	-1.53305	1.71931	0.372573	0.507198
FBgn0014411	Vps26	X	1873853	1876474	+	2543	1497.63	588.924	1506.19	592.289	0.0116532	0.0790208	0.882761	0.921856	1363	535.98	-0.134926	0.0798598	0.0911171	0.167062
FBgn0014417	CG13397	2L	8408888	8411868	-	2902	533.205	183.737	199.414	68.716	-1.4192	0.108497	4.24879e-39	1.24439e-37	277.974	95.7872	-0.937871	0.106964	1.81718e-18	2.63478e-17
FBgn0014427	CG11899	3R	29200454	29201770	+	1176	25.4473	21.6389	68.883	58.574	1.46451	0.293945	6.28488e-07	2.72729e-06	52.3433	44.5096	1.05378	0.302597	0.000496826	0.00161627
FBgn0014454	Acp1	2L	7740562	7741537	-	858	0	0	0	0	NA	NA	NA	NA	0	0	NA	NA	NA	NA
FBgn0014455	Ahcy	X	15450261	15453167	+	2119	758.028	357.729	655.176	309.191	-0.206356	0.0862493	0.0167318	0.0359094	654.431	308.839	-0.212342	0.0874012	0.0151192	0.0352818
FBgn0014464	Cp7Fa	X	8470888	8473087	+	1183	0.365555	0.309007	0.355025	0.300106	-0.562882	3.63463	0.876927	NA	0	0	-1.21951	3.63468	0.737232	NA
FBgn0014465	Cp7Fb	X	8473837	8476071	+	2093	1.93985	0.92683	0.222156	0.106142	-2.74399	1.96031	0.161582	0.254796	0.309586	0.147915	-2.43883	1.96032	0.213465	0.330599
FBgn0014466	Cp7Fc	X	8477117	8478320	+	1132	0.731111	0.645857	0.475613	0.420153	-0.586087	2.21982	0.791761	0.857305	0.69983	0.618224	-0.149595	2.20172	0.94583	0.964525
FBgn0014469	Cyp4e2	2R	8444560	8447164	+	1897	1391.91	733.745	1577.01	831.318	0.184011	0.0881443	0.0368332	0.0720145	2274.82	1199.17	0.709544	0.0878287	6.54493e-16	7.85075e-15
FBgn0014848	Eig71Eh	3L	15658936	15659441	-	443	0	0	0	0	NA	NA	NA	NA	0	0	NA	NA	NA	NA
FBgn0014849	Eig71Ei	3L	15659707	15660351	+	530	0	0	0	0	NA	NA	NA	NA	0	0	NA	NA	NA	NA
FBgn0014850	Eig71Ej	3L	15660549	15661015	-	403	0	0	0	0	NA	NA	NA	NA	0	0	NA	NA	NA	NA
FBgn0014851	Eig71Ek	3L	15661248	15661809	+	445	0	0	0	0	NA	NA	NA	NA	0	0	NA	NA	NA	NA
FBgn0014857	His3.3A	2L	5055058	5056149	+	1002	1097.83	1095.64	1103.52	1101.32	0.0112457	0.0772909	0.884317	0.923094	1357.03	1354.32	0.308658	0.0772744	6.48825e-05	0.000246996
FBgn0014859	Hr38	2L	20683462	20714588	-	7704	94.0994	12.2144	174.268	22.6205	0.905317	0.179912	4.85369e-07	2.1308e-06	105.096	13.6418	0.168416	0.189135	0.373221	0.507856
FBgn0014861	Mcm2	3R	8264970	8267924	+	2898	290.84	100.359	416.566	143.743	0.516095	0.122131	2.38146e-05	8.32857e-05	340.789	117.594	0.221784	0.124903	0.0757909	0.143245
FBgn0014863	Mlp84B	3R	7112850	7117732	-	3136	4.60379	1.46805	10.4614	3.3359	1.17795	0.635283	0.0637097	0.115787	15.7247	5.01425	1.73745	0.628361	0.00569133	0.0148013
FBgn0014865	Mtk	2R	15408846	15409113	+	268	0	0	0	0	NA	NA	NA	NA	0	0	NA	NA	NA	NA
FBgn0014868	Ost48	X	9156929	9158515	-	1513	598.45	395.538	773.965	511.544	0.371087	0.101495	0.000255972	0.000766484	789.324	521.695	0.400292	0.102211	8.99072e-05	0.000334066
FBgn0014869	Pglym78	3R	29148248	29149901	+	1136	342.713	301.684	310.723	273.523	-0.133718	0.108848	0.219266	0.325933	409.804	360.743	0.261737	0.108296	0.0156545	0.0364039
FBgn0014870	Psi	2R	16861321	16867714	-	5690	2323.96	408.43	3000.77	527.376	0.368138	0.0665726	3.20471e-08	1.59063e-07	2577.61	453.007	0.148085	0.0671725	0.0274863	0.0597492
FBgn0014877	Roe1	2R	13554077	13555606	+	1065	481.032	451.673	633.794	595.112	0.405973	0.106845	0.000144894	0.000451427	736.016	691.095	0.615063	0.107086	9.26669e-09	5.82143e-08
FBgn0014879	Set	3R	15263552	15265253	+	1169	2456.57	2101.43	4675.7	3999.74	0.928434	0.081449	4.23122e-30	8.88469e-29	3695.33	3161.1	0.58841	0.0818558	6.55701e-13	6.16277e-12
FBgn0014903	CG14630	X	1031496	1033165	+	1358	0.365555	0.269186	0.253458	0.18664	-0.562881	3.84239	0.883533	NA	0	0	-1.21951	3.84245	0.750956	NA
FBgn0014906	Hydr2	2L	3163645	3169462	+	2857	2247.08	786.519	1376.44	481.777	-0.706187	0.0969017	3.15384e-13	2.39376e-12	1191.84	417.163	-0.91493	0.0977759	8.17116e-21	1.39204e-19
FBgn0014930	CG2846	3R	7912017	7913290	-	1210	259.261	214.265	164.874	136.26	-0.652355	0.128598	3.91954e-07	1.74635e-06	189.843	156.895	-0.446469	0.129509	0.000565998	0.0018222
FBgn0014931	CG2678	3R	7913851	7916550	+	2003	130.628	65.2163	31.393	15.673	-2.04822	0.224374	6.93888e-20	8.31602e-19	68.3641	34.1308	-0.927758	0.206583	7.08973e-06	3.12262e-05
FBgn0014949	btn	3R	22586149	22586625	-	477	5.86759	12.301	0.666467	1.3972	-2.9504	1.34751	0.0285592	0.0577376	0.69983	1.46715	-3.09363	1.44677	0.0324927	0.068924
FBgn0015000	betaggt-I	2L	4945579	4948324	+	1784	690.329	386.956	724.613	406.173	0.0738734	0.0824055	0.370006	0.491522	709.828	397.886	0.0436365	0.0835958	0.601675	0.716248
FBgn0015001	iotaTry	2R	11356720	11357537	+	818	0	0	0	0	NA	NA	NA	NA	0	0	NA	NA	NA	NA
FBgn0015008	Actn3	3R	16975885	16977795	-	1856	0.491696	0.264922	0	0	-1.52464	4.08046	0.708668	NA	0	0	-1.21951	4.08052	0.765046	NA
FBgn0015010	Ag5r	X	14784664	14786551	-	1760	0.365555	0.207702	0	0	-1.52465	3.72015	0.681928	NA	0.309586	0.175901	-0.257722	3.7202	0.94477	NA
FBgn0015011	AhcyL2	3R	16978439	16982158	-	1969	68.9547	35.0202	64.5412	32.7787	-0.0880779	0.23259	0.704924	0.791081	63.3431	32.1702	-0.109869	0.23726	0.643311	0.752309
FBgn0015019	CCT3	3R	16647605	16649978	+	2165	5350.66	2471.44	3666.38	1693.48	-0.546497	0.0555457	7.67038e-23	1.09794e-21	3331.22	1538.67	-0.683732	0.0560244	2.95236e-34	1.02527e-32
FBgn0015024	CkIalpha	X	12653626	12657834	+	3369	13110.8	3891.61	11583.6	3438.3	-0.179101	0.0807334	0.0265258	0.0541219	11908.3	3534.67	-0.138973	0.0807896	0.085399	0.158273
FBgn0015025	CkIIalpha-i1	3L	15816979	15818621	+	1585	91.5671	57.7711	71.3336	45.0054	-0.364518	0.195568	0.0623365	0.113759	80.2182	50.6108	-0.185986	0.197383	0.346059	0.480237
FBgn0015031	cype	2L	5327227	5327969	+	522	201.017	385.09	225.88	432.721	0.174296	0.14	0.213142	0.318366	239.16	458.16	0.251814	0.141456	0.0750507	0.142225
FBgn0015032	Cyp4c3	3R	30894038	30900688	+	1906	0	0	0	0	NA	NA	NA	NA	0	0	NA	NA	NA	NA
FBgn0015033	Cyp4d8	3L	7493557	7496197	-	1573	6.52958	4.15104	0.222156	0.14123	-4.49801	1.4886	0.00251408	0.00639244	0.684856	0.435382	-3.29364	1.36564	0.0158741	0.0368281
FBgn0015034	Cyp4e1	2R	8447451	8449745	+	1772	6.17689	3.48583	3.32929	1.87883	-0.79853	0.893743	0.371607	0.493063	6.33035	3.57243	0.0575161	0.864339	0.946945	0.965116
FBgn0015035	Cyp4e3	2L	9747839	9750071	-	1805	1.45519	0.806199	1.20468	0.667415	-0.268022	1.58369	0.865608	0.910964	1.02439	0.567529	-0.579052	1.65688	0.726727	0.812272
FBgn0015036	Cyp4ae1	X	2179007	2180998	+	1822	0.365555	0.200634	0	0	-1.52465	3.6901	0.679481	NA	0.32456	0.178134	-0.257722	3.69015	0.944321	NA
FBgn0015037	Cyp4p1	2R	9240041	9242139	+	1680	20.3819	12.1321	5.42048	3.22648	-1.9311	0.536998	0.000323012	0.000954017	9.4151	5.60422	-1.12616	0.507921	0.0266101	0.0580478
FBgn0015038	Cyp9b1	2R	7127838	7129808	-	1752	0.358524	0.204637	0	0	-1.52466	2.98015	0.608928	NA	0.684856	0.3909	0.658842	2.91916	0.821438	NA
FBgn0015039	Cyp9b2	2R	7130277	7132139	-	1667	0	0	0	0	NA	NA	NA	NA	0	0	NA	NA	NA	NA
FBgn0015040	Cyp9c1	2R	24631063	24632923	+	1743	1919.54	1101.29	2323.5	1333.05	0.277021	0.0676521	4.22548e-05	0.000142915	2093.63	1201.17	0.125279	0.0682961	0.0666021	0.128635
FBgn0015075	Ddx1	3L	22263369	22266017	+	2470	695.794	281.698	574.045	232.407	-0.276306	0.0968208	0.0043202	0.0105089	532.648	215.647	-0.387874	0.0984586	8.16646e-05	0.000305612
FBgn0015218	eIF4E1	3L	9399618	9402460	-	2235	6570.67	2939.9	6976.3	3121.39	0.0859722	0.0568007	0.130133	0.212253	6914.21	3093.61	0.073272	0.056966	0.198359	0.311521
FBgn0015221	Fer2LCH	3R	30387804	30390584	+	1648	23622.7	14334.2	14421.2	8750.71	-0.712055	0.0591529	2.25602e-33	5.36954e-32	16325.9	9906.5	-0.53286	0.0591779	2.16912e-19	3.33494e-18
FBgn0015222	Fer1HCH	3R	30385573	30388178	-	2376	356.311	149.963	429.708	180.853	0.269169	0.10682	0.0117408	0.0260414	554.897	233.542	0.642343	0.106487	1.61845e-09	1.10174e-08
FBgn0015229	glec	3R	21850694	21856266	-	2050	2094.76	1021.84	2614.28	1275.26	0.318023	0.108984	0.00352196	0.00870681	3484.61	1699.81	0.732823	0.108896	1.70138e-11	1.40583e-10
FBgn0015230	Glut3	3R	16788311	16790021	+	1711	0	0	0	0	NA	NA	NA	NA	0	0	NA	NA	NA	NA
FBgn0015239	Hr78	3L	21494019	21497494	-	2420	483.543	199.811	394.757	163.123	-0.287171	0.101764	0.00477363	0.0115127	384.937	159.065	-0.325043	0.103583	0.00170108	0.00497501
FBgn0015240	Hr96	3R	25025235	25029351	+	2834	197.511	69.6934	157.101	55.4344	-0.322379	0.14153	0.0227377	0.047324	164.841	58.1655	-0.256589	0.143749	0.0742638	0.141219
FBgn0015245	Hsp60A	X	11108482	11112308	+	2480	5071	2044.76	4785.92	1929.8	-0.0837431	0.0619168	0.176212	0.273438	5920.36	2387.24	0.223305	0.0619017	0.000309259	0.00104298
FBgn0015247	Diap2	2R	15932170	15934825	-	2134	452.972	212.264	255.232	119.603	-0.83295	0.113491	2.14667e-13	1.6578e-12	308.029	144.343	-0.554281	0.113623	1.07037e-06	5.20866e-06
FBgn0015268	Nap1	2R	23905175	23907294	-	1582	6140.11	3881.23	9590.97	6062.56	0.643243	0.0602141	1.22778e-26	2.15508e-25	9017.04	5699.77	0.554146	0.0603604	4.28606e-20	6.97855e-19
FBgn0015269	Nf1	3R	25983013	25995737	+	10064	751.279	74.6502	831.24	82.5954	0.143883	0.0933218	0.123125	0.202576	732.438	72.7781	-0.0395885	0.0947391	0.676043	0.773733
FBgn0015270	Orc2	3R	13964885	13967075	+	1995	137.604	68.9746	236.636	118.615	0.784059	0.158654	7.73511e-07	3.31137e-06	174.398	87.4174	0.336767	0.163638	0.0395906	0.0820563
FBgn0015271	Orc5	2L	13829837	13831576	+	1687	122.927	72.8675	182.048	107.912	0.56653	0.151814	0.000190173	0.000581271	166.145	98.4852	0.431396	0.155359	0.00549027	0.0143235
FBgn0015277	Pi3K59F	2R	23560492	23564045	+	3164	316.605	100.065	251.163	79.3814	-0.32978	0.124235	0.00794288	0.018313	267.324	84.4894	-0.239899	0.125622	0.0561734	0.111138
FBgn0015278	Pi3K68D	3L	11774650	11790013	-	7799	781.444	100.198	754.149	96.6981	-0.0538049	0.0848214	0.525864	0.639758	672.229	86.1943	-0.221861	0.0864798	0.0103039	0.0251754
FBgn0015279	Pi3K92E	3R	20628972	20634732	-	4839	1188.62	245.633	1066.02	220.298	-0.160444	0.0755057	0.0335928	0.0663951	1098.88	227.087	-0.114457	0.07616	0.132879	0.227819
FBgn0015282	Rpt2	3R	23929873	23931558	-	1625	1864.33	1147.28	1837.64	1130.86	-0.0199368	0.06618	0.763224	0.835935	1833.39	1128.24	-0.023526	0.066706	0.724326	0.81041
FBgn0015283	Rpn10	3L	21537000	21538582	+	1422	1536.89	1080.8	1239.91	871.95	-0.308481	0.0698086	9.91807e-06	3.65605e-05	1137.53	799.951	-0.43277	0.0708991	1.03432e-09	7.19894e-09
FBgn0015286	Rala	X	3704610	3719635	-	2751	3183.13	1157.08	2266.42	823.852	-0.490791	0.092877	1.26181e-07	5.93691e-07	1858.08	675.42	-0.777051	0.0935366	9.77813e-17	1.24349e-15
FBgn0015288	RpL22	X	762560	765130	-	1100	1602.96	1457.23	1491.3	1355.72	-0.104994	0.0996482	0.292046	0.409841	1809.05	1644.59	0.174323	0.0996561	0.0802489	0.150327
FBgn0015295	Shark	2R	16199426	16202884	-	3176	240.802	75.8194	196.368	61.8289	-0.294404	0.124416	0.017967	0.0383047	223.332	70.3185	-0.108507	0.125367	0.386756	0.522265
FBgn0015296	Shc	3L	9427010	9428671	+	1600	488.752	305.47	318.043	198.777	-0.617341	0.105617	5.06318e-09	2.70116e-08	325.2	203.25	-0.584031	0.1073	5.23983e-08	3.02043e-07
FBgn0015298	Srp19	3L	7347310	7348034	-	653	100.315	153.622	117.807	180.409	0.243645	0.209375	0.244555	0.35572	137.092	209.941	0.451703	0.210073	0.031538	0.067111
FBgn0015299	Ssb-c31a	2L	8211347	8211938	+	536	295.34	551.008	174.981	326.456	-0.743285	0.132125	1.84838e-08	9.41136e-08	181.895	339.357	-0.697755	0.134445	2.10404e-07	1.12571e-06
FBgn0015300	Ssl	2R	24499243	24500267	-	908	0	0	0	0	NA	NA	NA	NA	0	0	NA	NA	NA	NA
FBgn0015316	Try29F	2L	8998537	8999816	+	1280	3.28177	2.56388	7.9894	6.24172	1.33945	0.740434	0.0704493	0.126208	11.2557	8.79352	1.80161	0.735415	0.014294	0.0335861
FBgn0015320	Ubc2	2L	10765010	10768006	-	2252	3267.16	1450.78	3626.96	1610.55	0.149916	0.0639304	0.0190276	0.0403206	3278.43	1455.79	0.00504131	0.064359	0.937565	0.958507
FBgn0015321	Ubc4	3L	9698336	9700481	+	1709	810.483	474.244	1048.93	613.77	0.371674	0.0821044	5.98697e-06	2.2746e-05	1028.39	601.748	0.34327	0.0829197	3.47628e-05	0.000137446
FBgn0015331	abs	3R	4233047	4235041	+	1995	419.214	210.132	357.392	179.144	-0.226593	0.11223	0.0434862	0.0831828	321.209	161.007	-0.384361	0.114809	0.000814505	0.00253913
FBgn0015336	CG15865	X	16660898	16664455	-	3429	2.07303	0.604557	0	0	-3.77713	2.21749	0.0885047	0.153677	0	0	-3.47198	2.2175	0.117415	0.205963
FBgn0015338	CG5861	2L	16305801	16307298	-	1126	489.812	435.002	812.001	721.137	0.730649	0.102535	1.03444e-12	7.53618e-12	781.001	693.606	0.672693	0.103463	7.93685e-11	6.19236e-10
FBgn0015351	CG14906	3R	16649981	16651157	-	1177	160.67	136.508	90.0954	76.5467	-0.823051	0.17228	1.77565e-06	7.23865e-06	121.849	103.525	-0.403054	0.170847	0.0183165	0.0418399
FBgn0015359	CG2034	3L	2257456	2258922	+	1284	240.587	187.373	299.224	233.041	0.309266	0.114568	0.00694612	0.016206	313.567	244.211	0.378679	0.115978	0.00109424	0.00332987
FBgn0015360	oxt	3L	2258839	2262664	-	3380	352.398	104.26	550.987	163.014	0.639521	0.11539	2.98579e-08	1.48967e-07	487.917	144.354	0.467366	0.117077	6.55267e-05	0.000248876
FBgn0015371	chn	2R	15115236	15144783	+	6256	1050.38	167.9	1232.19	196.961	0.225565	0.0872349	0.00971748	0.0219561	1117.21	178.583	0.0867797	0.088148	0.324881	0.458992
FBgn0015372	RabX1	2R	23519839	23523613	-	1648	3753.26	2277.46	1370.77	831.778	-1.45437	0.0969552	7.29359e-51	3.20886e-49	1394.81	846.363	-1.42793	0.0973792	1.10318e-48	6.76345e-47
FBgn0015376	cutlet	2L	3707230	3711748	-	3236	168.111	51.9504	248.751	76.8699	0.56666	0.134871	2.65156e-05	9.21608e-05	170.304	52.6278	0.0155922	0.141455	0.912229	0.942402
FBgn0015379	dod	X	21345358	21346858	+	1021	372.509	364.848	689.082	674.909	0.89455	0.104412	1.05716e-17	1.09409e-16	603.503	591.09	0.701597	0.105976	3.58426e-11	2.88952e-10
FBgn0015380	drl	2L	19190342	19208621	+	3104	14.6827	4.73025	11.8824	3.82809	-0.345894	0.498899	0.488113	0.606738	6.62496	2.13433	-1.15863	0.552418	0.0359595	0.0753321
FBgn0015381	dsf	2L	5925937	5939261	+	3537	0	0	0.222156	0.062809	0.39891	4.02691	0.92109	NA	0.32456	0.0917614	0.704067	4.02698	0.861207	NA
FBgn0015391	glu	2L	16733617	16738388	-	4521	3977.44	879.77	7885.93	1744.29	0.986588	0.0769985	1.38516e-37	3.85681e-36	6447.53	1426.13	0.696024	0.0772293	2.01538e-19	3.10337e-18
FBgn0015396	jumu	3R	10350182	10361612	+	3860	1021.86	264.729	1578.8	409.016	0.624355	0.0780229	1.22209e-15	1.09428e-14	1257.94	325.892	0.296634	0.0792504	0.000181841	0.000636157
FBgn0015399	kek1	2L	12817000	12822787	-	5788	4647.86	803.016	5748.28	993.137	0.305432	0.0753069	4.99554e-05	0.000167391	6885.1	1189.55	0.566219	0.0753172	5.57067e-14	5.73347e-13
FBgn0015400	kek2	2L	11581937	11626883	+	6939	2.17927	0.314061	2.26976	0.327102	-0.0961542	0.950775	0.919445	0.946864	12.8128	1.84649	2.45669	0.837139	0.00333949	0.00914975
FBgn0015402	ksr	3R	5478390	5483906	-	5517	380.16	68.9071	552.703	100.182	0.535689	0.09991	8.24375e-08	3.95008e-07	504.241	91.3977	0.407467	0.101648	6.10798e-05	0.000233414
FBgn0015477	Rme-8	2R	9167763	9177261	-	7771	1006.12	129.471	1210.47	155.768	0.264507	0.0802472	0.000980208	0.0026808	1077.33	138.634	0.0957761	0.0813386	0.238997	0.361114
FBgn0015509	Cul1	2R	7916856	7921579	+	4141	1884.76	455.147	1427.42	344.704	-0.402387	0.0660471	1.11213e-09	6.28269e-09	1537.16	371.205	-0.295337	0.0664568	8.82857e-06	3.8324e-05
FBgn0015513	mbc	3R	23781765	23801634	+	7465	1255.32	168.16	484.149	64.8559	-1.37592	0.0945445	5.57679e-48	2.24909e-46	701.628	93.989	-0.840792	0.0935808	2.59528e-19	3.95342e-18
FBgn0015519	nAChRalpha3	X	8276200	8367169	-	10506	15.777	1.50171	7.94369	0.75611	-0.995153	0.578401	0.0853375	0.148941	1.96812	0.187333	-2.97152	0.781817	0.000144234	0.000517347
FBgn0015520	nonA-l	3R	16640205	16643112	+	2908	782.692	269.151	582.927	200.456	-0.431748	0.101938	2.28142e-05	8.00347e-05	696.036	239.352	-0.169611	0.102034	0.0964544	0.175262
FBgn0015521	RpS21	2L	2856070	2857029	+	842	601.83	714.762	1045.6	1241.81	0.803678	0.0956472	4.36967e-17	4.30737e-16	1211.11	1438.38	1.0132	0.0958066	3.87217e-26	8.84846e-25
FBgn0015522	olf186-M	2R	17846699	17848444	+	1746	180.448	103.349	121.137	69.3796	-0.593586	0.155837	0.000139527	0.000436313	142.148	81.4133	-0.350367	0.156448	0.0251222	0.0552144
FBgn0015524	otp	2R	20883625	20903414	-	3368	2.67097	0.793042	1.4971	0.444508	-0.808435	0.974382	0.406714	0.528978	12.8896	3.82709	2.23503	0.80394	0.00543432	0.0141961
FBgn0015527	peng	X	21346503	21349843	-	2367	759.648	320.933	1656.31	699.75	1.12724	0.0740689	2.65328e-52	1.20381e-50	1373.75	580.376	0.857442	0.0751626	3.82151e-30	1.07522e-28
FBgn0015543	snoRNA:Me28S-A1322	2R	11893123	11893195	+	73	8.46944	116.02	7.94674	108.859	-0.113722	0.595836	0.848634	0.898123	9.80534	134.32	0.180073	0.596193	0.762623	0.841043
FBgn0015544	spag	2R	24159384	24161503	+	1825	1092.6	598.683	1295.74	709.994	0.24233	0.0897356	0.00692384	0.0161615	1271.44	696.679	0.215972	0.0903316	0.0168078	0.038732
FBgn0015546	spel1	2L	14362069	14366840	+	4433	173.644	39.1707	210.553	47.4968	0.275238	0.135669	0.0424844	0.0815891	183.763	41.4533	0.0756146	0.139693	0.588307	0.705173
FBgn0015550	tap	3L	17359682	17361811	+	2130	0	0	0	0	NA	NA	NA	NA	0	0	NA	NA	NA	NA
FBgn0015553	tos	2L	18679631	18682075	-	2390	207.919	86.9954	390.403	163.348	0.907793	0.119898	3.69329e-14	3.01485e-13	273.199	114.309	0.390677	0.124394	0.00168572	0.00493589
FBgn0015558	tty	X	21328613	21339676	-	7616	26.4014	3.46657	29.1141	3.82275	0.161826	0.371624	0.663232	0.756077	31.1731	4.09311	0.263625	0.375413	0.482538	0.613654
FBgn0015561	unpg	2R	9195205	9199870	+	1690	0	0	0	0	NA	NA	NA	NA	0	0	NA	NA	NA	NA
FBgn0015568	alpha-Est1	3R	7545733	7549124	-	2123	95.7507	45.1016	10.0134	4.71661	-3.24809	0.335265	3.38686e-22	4.64516e-21	10.0792	4.74762	-3.25502	0.35532	5.15075e-20	8.31826e-19
FBgn0015569	alpha-Est10	3R	7486583	7493845	-	2341	229.727	98.132	293.753	125.482	0.362181	0.12065	0.00268289	0.00678601	231.913	99.0659	0.0200555	0.125022	0.872553	0.916282
FBgn0015570	alpha-Est2	3R	7541810	7545230	+	2141	0.85022	0.397114	0.253458	0.118383	-1.5076	2.51425	0.548759	NA	0.32456	0.151593	-1.20244	2.51427	0.632476	NA
FBgn0015571	alpha-Est3	3R	7538972	7541631	-	1932	273.116	141.365	72.4424	37.4961	-1.8968	0.164206	7.26928e-31	1.57522e-29	69.0716	35.7514	-1.98647	0.171412	4.69357e-31	1.38328e-29
FBgn0015572	alpha-Est4	3R	7536687	7538615	-	1749	15.2595	8.72471	8.12993	4.64833	-0.922587	0.534294	0.0842144	0.14731	5.68123	3.24827	-1.4499	0.58237	0.0127867	0.0304403
FBgn0015574	alpha-Est6	3R	7524567	7528777	-	1836	0	0	0	0	NA	NA	NA	NA	0	0	NA	NA	NA	NA
FBgn0015575	alpha-Est7	3R	7519563	7523753	-	2017	266.01	131.884	408.934	202.744	0.631624	0.108935	6.70456e-09	3.53599e-08	790.555	391.946	1.57776	0.106597	1.43831e-49	9.09894e-48
FBgn0015576	alpha-Est8	3R	7509343	7515670	-	2646	38.0265	14.3713	28.5455	10.7882	-0.420188	0.299817	0.16107	0.254146	43.2339	16.3394	0.20217	0.293107	0.490354	0.620723
FBgn0015577	alpha-Est9	3R	7493921	7505098	-	3455	51.1545	14.8059	18.0908	5.23613	-1.55035	0.333247	3.28354e-06	1.29897e-05	27.772	8.0382	-0.898687	0.32288	0.00538019	0.0140769
FBgn0015582	dare	2R	11290994	11293174	-	1681	54.4334	32.3815	62.086	36.934	0.210615	0.261923	0.421333	0.543471	62.5896	37.2335	0.222098	0.265712	0.403234	0.538978
FBgn0015583	Acp29AB	2L	8392456	8393222	-	767	0	0	0	0	NA	NA	NA	NA	0	0	NA	NA	NA	NA
FBgn0015584	Acp53Ea	2R	16749803	16750335	-	468	0	0	0	0	NA	NA	NA	NA	0	0	NA	NA	NA	NA
FBgn0015585	Acp63F	3L	3815839	3816354	-	401	0	0	0	0	NA	NA	NA	NA	0	0	NA	NA	NA	NA
FBgn0015586	Acp76A	3L	19050757	19052026	-	1201	0.491696	0.409406	1.30625	1.08764	1.60964	1.95598	0.410544	0.5328	1.12581	0.937394	1.31994	2.01054	0.511496	0.639418
FBgn0015589	Apc	3R	28832301	28844748	-	8506	469.419	55.1868	470.12	55.2693	-0.00560233	0.100762	0.955661	0.971238	473.437	55.6592	0.00480656	0.102059	0.962437	0.975699
FBgn0015591	AstA	3R	24760530	24765071	-	1459	5.01034	3.43409	1.88343	1.29091	-1.39352	1.05315	0.18577	0.286101	1.88747	1.29367	-1.33432	1.07938	0.216387	0.334239
FBgn0015600	toc	2L	3068345	3144786	-	11265	92.1815	8.183	19.665	1.74567	-2.24868	0.231819	3.01046e-22	4.1457e-21	355.546	31.562	1.94283	0.164383	3.11621e-32	9.76348e-31
FBgn0015602	BEAF-32	2R	14770469	14772630	+	1919	787.374	410.304	1427.72	743.99	0.85661	0.0785828	1.14346e-27	2.12062e-26	1166.47	607.855	0.564726	0.0798348	1.50881e-12	1.37105e-11
FBgn0015609	CadN	2L	17647053	17778340	-	14396	536.006	37.233	901.006	62.5872	0.751067	0.0947646	2.27033e-15	2.0029e-14	328.13	22.7932	-0.7116	0.102369	3.61884e-12	3.20342e-11
FBgn0015614	CanB2	2R	7786010	7789053	+	2061	1945.56	943.991	1064.53	516.514	-0.872864	0.078724	1.44025e-28	2.79871e-27	1120.83	543.828	-0.796171	0.0792654	9.72707e-24	1.97162e-22
FBgn0015615	SMC3	X	16588996	16593439	-	4020	1089.59	271.042	1046.08	260.219	-0.0605242	0.0757055	0.424018	0.546034	896.097	222.91	-0.281941	0.0772291	0.000261513	0.000895021
FBgn0015618	Cdk8	3L	9837080	9838670	-	1529	164.823	107.798	134.615	88.0414	-0.288629	0.153033	0.0592863	0.108976	159.139	104.081	-0.050964	0.153632	0.740095	0.823507
FBgn0015621	Clp	2L	819964	821209	+	1246	110.713	88.8551	142.465	114.338	0.351834	0.163785	0.031702	0.0630997	134.928	108.289	0.28436	0.167276	0.0891415	0.164167
FBgn0015622	Cnx99A	3R	29315254	29319644	-	2795	4727.88	1691.55	3971.86	1421.06	-0.252351	0.0585604	1.63818e-05	5.87469e-05	3796.34	1358.26	-0.316725	0.0588982	7.55278e-08	4.27431e-07
FBgn0015623	Cpr	2L	6338836	6346280	+	3344	1787.57	534.561	1265.67	378.489	-0.497684	0.0710369	2.45249e-12	1.7357e-11	1588.82	475.125	-0.171214	0.0709581	0.0158269	0.0367272
FBgn0015625	CycB3	3R	24867934	24870816	-	2883	422.941	146.702	652.516	226.332	0.617191	0.105275	4.55523e-09	2.44687e-08	539.234	187.039	0.347051	0.107236	0.00121074	0.0036506
FBgn0015663	Ugt36A1	2L	3619097	3621573	+	2303	267.163	116.006	215.767	93.6896	-0.304237	0.135231	0.0244647	0.0504023	209.199	90.8378	-0.355098	0.137845	0.00999319	0.0244826
FBgn0015664	Dref	2L	9964147	9967229	-	2872	816.809	284.404	1005.73	350.186	0.29903	0.0924822	0.00122337	0.00328919	899.539	313.21	0.135671	0.0936046	0.147224	0.247165
FBgn0015714	Cyp6a17	2R	14873953	14875739	+	1727	1124.11	650.905	274.192	158.768	-2.03278	0.0874447	1.54629e-119	2.53468e-117	798.087	462.123	-0.494667	0.0803971	7.61274e-10	5.35101e-09
FBgn0015721	ktub	2R	21101928	21123704	+	2523	0	0	0	0	NA	NA	NA	NA	0	0	NA	NA	NA	NA
FBgn0015737	Hmu	3R	27288769	27291592	+	2360	7699.8	3262.63	4223.3	1789.53	-0.867455	0.0767259	1.22678e-29	2.52384e-28	5945.18	2519.14	-0.373674	0.0766054	1.07215e-06	5.21476e-06
FBgn0015754	Lis-1	2R	16178826	16185103	+	3459	992.271	286.867	1042.8	301.474	0.068211	0.0864107	0.429889	0.551776	1000.7	289.302	0.011252	0.0872667	0.897407	0.932976
FBgn0015756	RpL9	2L	11002758	11004189	-	916	5894.28	6434.8	6881.5	7512.55	0.223629	0.0873351	0.0104494	0.023438	8261.37	9018.96	0.487382	0.0873413	2.40233e-08	1.44256e-07
FBgn0015765	p38a	3R	24150416	24152321	-	1634	1028.55	629.467	768.141	470.099	-0.419447	0.0940787	8.25448e-06	3.08193e-05	730.475	447.047	-0.493973	0.0952059	2.12028e-07	1.13218e-06
FBgn0015766	Msr-110	3L	5566919	5577348	-	2902	2677.25	922.555	2373.39	817.845	-0.173972	0.0694269	0.0122163	0.0270253	4037.15	1391.16	0.592583	0.0689324	8.21322e-18	1.13297e-16
FBgn0015770	MstProx	3R	7365939	7369305	-	3262	3.04939	0.934822	1.94604	0.596577	-0.612618	1.1529	0.59516	0.699181	3.51027	1.07611	0.288009	1.10856	0.795015	0.863904
FBgn0015772	Nak	2L	18957732	18968744	-	7322	1168	159.519	1266.54	172.978	0.112569	0.0793792	0.156155	0.247621	989.739	135.173	-0.242343	0.0809643	0.00276068	0.00773004
FBgn0015773	NetA	X	14604012	14653928	-	3343	2.33234	0.697679	0.71005	0.212399	-1.84268	1.86383	0.322834	0.442595	1.12581	0.336766	-1.05236	1.79286	0.557221	0.678642
FBgn0015774	NetB	X	14686038	14749376	-	8168	11.3927	1.39479	7.60307	0.930836	-0.554557	0.566364	0.327504	0.44767	9.79569	1.19928	-0.209363	0.564534	0.710742	0.800714
FBgn0015776	nrv1	2L	6778555	6786861	-	2195	3088.78	1407.19	1750.18	797.347	-0.820353	0.0610919	4.13499e-41	1.29703e-39	1628.67	741.992	-0.922535	0.0619216	3.3738e-50	2.17588e-48
FBgn0015777	nrv2	2L	6789770	6798862	-	3568	990.875	277.712	1048.65	293.904	0.08311	0.0837791	0.321191	0.441056	1045.75	293.091	0.0809095	0.0845048	0.338338	0.472216
FBgn0015778	rin	3R	13647004	13654527	+	5711	30391.8	5321.63	28261.6	4948.63	-0.105077	0.0771767	0.173351	0.269714	33872.4	5931.08	0.156325	0.0771786	0.0428164	0.0877352
FBgn0015781	P5cr	3R	19028931	19030159	+	1168	96.0225	82.211	86.6753	74.2083	-0.132218	0.194559	0.49677	0.614792	76.7456	65.7068	-0.325325	0.201217	0.105923	0.189487
FBgn0015789	Rab10	X	20251338	20254691	+	2336	2070.21	886.22	1678.53	718.548	-0.305081	0.069554	1.15327e-05	4.21606e-05	1782	762.842	-0.217046	0.0699187	0.00190758	0.00553009
FBgn0015790	Rab11	3R	21111408	21116146	+	1815	14625.3	8058	8969.43	4941.84	-0.705783	0.0540894	6.48581e-39	1.88329e-37	9214.54	5076.88	-0.666611	0.0541987	9.12462e-35	3.28354e-33
FBgn0015791	Rab14	2L	14355145	14358764	+	1857	976.42	525.805	920.139	495.498	-0.087361	0.0812548	0.282308	0.39904	1065.98	574.031	0.126975	0.0814633	0.119072	0.208098
FBgn0015793	Rab19	3L	8297018	8298506	+	1105	121.11	109.602	113.878	103.057	-0.0944356	0.168339	0.574808	0.682657	94.7514	85.7478	-0.356906	0.175233	0.0416749	0.0856612
FBgn0015794	Rab18	X	5670827	5671812	-	833	114.023	136.882	92.0988	110.563	-0.29659	0.186758	0.112264	0.187654	93.0822	111.743	-0.295378	0.190466	0.120945	0.210704
FBgn0015795	Rab7	3R	23993008	23995452	+	1700	2739.47	1611.45	1455.62	856.245	-0.910778	0.0669421	3.71563e-42	1.23405e-40	1464.53	861.485	-0.902174	0.0675697	1.15706e-40	5.17656e-39
FBgn0015797	Rab6	2L	12107221	12109116	-	1896	1662.05	876.609	1531.53	807.767	-0.116534	0.0668187	0.0811533	0.142717	1692.71	892.778	0.0264835	0.0671169	0.693148	0.786996
FBgn0015799	Rbf	X	797090	801479	-	3619	1113.89	307.788	1414.54	390.866	0.343386	0.0761031	6.41849e-06	2.42675e-05	1339.84	370.223	0.266664	0.0768661	0.00052202	0.00168993
FBgn0015801	Reg-5	2R	24788008	24793410	-	1781	336.16	188.748	277.552	155.84	-0.285279	0.13318	0.0321887	0.0639432	308.012	172.943	-0.127518	0.133939	0.341067	0.475036
FBgn0015803	RtGEF	2L	20350434	20365254	+	8609	763.266	88.6591	429.443	49.8831	-0.831002	0.0923959	2.3855e-19	2.73324e-18	481.337	55.9109	-0.665786	0.093075	8.47677e-13	7.85366e-12
FBgn0015805	HDAC1	3L	4626734	4629467	+	2124	1052.34	495.452	1791.11	843.272	0.768633	0.07053	1.17878e-27	2.18214e-26	1470.14	692.156	0.483076	0.0716277	1.53805e-11	1.28153e-10
FBgn0015808	ScpX	2L	18831229	18833630	+	1883	967.133	513.613	588.114	312.328	-0.714359	0.102278	2.85853e-12	2.00354e-11	654.934	347.814	-0.564353	0.10276	3.97531e-08	2.3335e-07
FBgn0015818	Spx	X	6255822	6257596	+	1643	452.11	275.174	594.948	362.111	0.396925	0.0928914	1.92858e-05	6.85319e-05	633.988	385.872	0.486066	0.0936705	2.11315e-07	1.12959e-06
FBgn0015828	TfIIEalpha	3L	11682038	11683805	+	1622	746.87	460.463	604.131	372.461	-0.307173	0.100074	0.00214447	0.00552732	552.475	340.614	-0.437153	0.10166	1.70696e-05	7.04634e-05
FBgn0015829	TfIIEbeta	3L	4287038	4288349	+	1121	183.357	163.566	190.707	170.122	0.0707423	0.143672	0.622446	0.722632	198.016	176.642	0.117265	0.145608	0.420617	0.555675
FBgn0015831	Rtnl2	3R	7528864	7530241	-	1026	2.17224	2.11719	1.96506	1.91526	-0.155096	1.22678	0.899395	0.933948	2.89688	2.82347	0.369044	1.21044	0.760455	0.839542
FBgn0015834	eIF3i	2L	4966367	4967775	-	1177	780.03	662.728	1181.19	1003.56	0.59847	0.0877462	9.07455e-12	6.06741e-11	1362.39	1157.51	0.804862	0.0879069	5.39352e-20	8.66803e-19
FBgn0015838	Vang	2R	9103238	9106796	+	3492	949.793	271.991	1331.4	381.271	0.484611	0.0829905	5.24027e-09	2.79271e-08	1123.86	321.838	0.242273	0.0841345	0.00398197	0.0107558
FBgn0015872	Drip	2R	11411203	11429645	-	2499	2.43155	0.97301	1.40782	0.563353	-0.816525	1.28987	0.526715	0.640235	1.4354	0.574388	-0.801611	1.32495	0.545171	0.668226
FBgn0015903	apt	2R	23564891	23599526	+	3696	3746.78	1013.74	6748.07	1825.78	0.847824	0.0738313	1.60128e-30	3.44055e-29	4643.3	1256.3	0.308782	0.0742733	3.21916e-05	0.000127993
FBgn0015904	ara	3L	12580672	12596018	+	2942	0.724079	0.246118	0.475613	0.161663	-0.578937	2.00591	0.772876	0.843235	1.00942	0.343105	0.397969	1.90508	0.834527	0.892127
FBgn0015905	ast	2L	1077948	1080803	+	2745	272.433	99.2469	375.308	136.724	0.455091	0.107271	2.21116e-05	7.76986e-05	383.291	139.633	0.487267	0.108681	7.34433e-06	3.22475e-05
FBgn0015919	caup	3L	12609631	12621798	+	4317	0	0	0	0	NA	NA	NA	NA	0	0	NA	NA	NA	NA
FBgn0015924	crq	2L	448254	453024	-	2848	1419.54	498.434	312.752	109.815	-2.18139	0.0936206	4.40357e-120	7.58534e-118	305.722	107.346	-2.21415	0.0960864	1.71617e-117	5.32656e-115
FBgn0015925	csul	2R	16264652	16266959	+	2013	211.082	104.859	225.908	112.225	0.109057	0.132405	0.410131	0.532607	234.216	116.352	0.151862	0.134211	0.257836	0.382981
FBgn0015926	dah	X	15328342	15331002	+	2353	265.354	112.773	221.781	94.2544	-0.24853	0.128568	0.0532284	0.099277	226.36	96.2008	-0.229741	0.130656	0.0786848	0.147899
FBgn0015929	dpa	2R	7496702	7500145	-	3071	424.854	138.344	731.087	238.062	0.784031	0.112974	3.92379e-12	2.71275e-11	620.13	201.931	0.54209	0.114499	2.19656e-06	1.03004e-05
FBgn0015946	grim	3L	18302719	18304417	-	1699	0	0	0	0	NA	NA	NA	NA	0	0	NA	NA	NA	NA
FBgn0015949	hrg	2R	19663919	19669832	-	4587	5285.97	1152.38	7424.9	1618.68	0.489087	0.0809765	1.5425e-09	8.5898e-09	7295.01	1590.37	0.464354	0.0810901	1.02587e-08	6.42027e-08
FBgn0016013	Faa	3L	4072032	4073954	-	1421	251.474	176.969	253.929	178.698	0.00584995	0.127443	0.963388	0.976747	176.646	124.311	-0.510589	0.133934	0.000137708	0.000495189
FBgn0016031	lama	3L	5343619	5355923	-	4046	24.576	6.07415	26.8636	6.63955	0.127302	0.358449	0.72248	0.804222	31.1552	7.70025	0.345561	0.360161	0.337326	0.471212
FBgn0016032	lbm	2R	7049238	7051964	+	1098	0.85022	0.774335	0.577181	0.525665	-0.571784	2.01532	0.776625	0.845783	1.06013	0.965507	0.337328	1.92671	0.861017	0.909263
FBgn0016034	mael	3L	22721203	22726234	+	2152	249.802	116.079	8.37572	3.89207	-4.87488	0.302367	1.77528e-58	9.80554e-57	32.3178	15.0175	-2.93656	0.217513	1.55091e-41	7.23173e-40
FBgn0016036	mei-P22	3L	7244388	7245383	+	996	16.6272	16.694	14.5851	14.6437	-0.204428	0.486132	0.674106	0.765041	12.7075	12.7586	-0.357875	0.500919	0.474957	0.607771
FBgn0016038	Vsp37A	X	621530	623051	+	1379	396.279	287.367	342.577	248.425	-0.210091	0.101324	0.0381309	0.0741815	359.398	260.622	-0.142308	0.102725	0.165954	0.271362
FBgn0016041	Tom40	X	7736893	7739978	+	2395	1285.11	536.582	1847.19	771.271	0.519791	0.0954487	5.15826e-08	2.52036e-07	1792.03	748.238	0.478555	0.0958614	5.97089e-07	3.00724e-06
FBgn0016047	nompA	2R	11310335	11318676	-	5235	0.365555	0.0698291	0	0	-1.52465	3.6901	0.679481	NA	0.32456	0.0619981	-0.257722	3.69015	0.944321	NA
FBgn0016053	pgc	2R	22330200	22332813	+	1212	38.5073	31.7717	5.10442	4.21156	-2.92728	0.504275	6.43936e-09	3.40495e-08	4.00772	3.3067	-3.26774	0.563448	6.64936e-09	4.25525e-08
FBgn0016054	phr6-4	2L	20643351	20645791	-	2167	240.65	111.052	157.273	72.5764	-0.608954	0.139915	1.347e-05	4.87693e-05	166.928	77.0321	-0.528391	0.142003	0.000198446	0.000690823
FBgn0016059	Sema1b	2R	17672839	17683499	-	4565	955.074	209.217	720.984	157.937	-0.405987	0.0796328	3.42838e-07	1.54171e-06	648.732	142.11	-0.558524	0.0814093	6.85294e-12	5.90828e-11
FBgn0016061	side	3R	27375088	27437482	-	11723	18.0484	1.53957	0.355025	0.0302845	-5.95598	1.29674	4.36844e-06	1.70167e-05	2.63801	0.225028	-2.76591	0.745535	0.00020729	0.000718354
FBgn0016070	smg	3L	8990317	8997989	-	5963	389.864	65.3805	580.736	97.39	0.567753	0.09522	2.48352e-09	1.35992e-08	523.565	87.8024	0.421476	0.0970425	1.40417e-05	5.88698e-05
FBgn0016075	vkg	2L	5012144	5028191	-	6503	28.8725	4.43987	196.431	30.2061	2.74297	0.206021	1.91841e-40	5.83736e-39	376.709	57.9285	3.68297	0.203482	3.20452e-73	4.35991e-71
FBgn0016076	vri	2L	5288944	5311223	+	4739	886.49	187.063	329.853	69.604	-1.43342	0.128879	9.77906e-29	1.91492e-27	423.025	89.2645	-1.07002	0.128549	8.51865e-17	1.09312e-15
FBgn0016078	wun	2R	9400531	9413463	-	2181	82.9318	38.0247	95.2088	43.6537	0.193389	0.191437	0.312401	0.430908	75.8989	34.8001	-0.131859	0.199689	0.509048	0.637884
FBgn0016081	fry	3L	9631834	9679103	-	11788	1200.69	101.857	788.93	66.9266	-0.607185	0.0784359	9.85189e-15	8.35766e-14	901.28	76.4574	-0.416106	0.0787719	1.2749e-07	6.99962e-07
FBgn0016119	ATPsynCF6	3R	23355220	23356064	-	704	1909.73	2712.69	1874.26	2662.3	-0.023747	0.0786752	0.762777	0.835632	1905.95	2707.32	-0.000448493	0.0790627	0.995474	0.997105
FBgn0016120	ATPsynD	3R	19095000	19096271	+	950	791.648	833.314	1049.02	1104.24	0.411787	0.108857	0.000155046	0.000480993	1047.53	1102.66	0.407046	0.109415	0.000199077	0.000692552
FBgn0016122	Acer	2L	8521933	8525740	+	3198	70.2448	21.9652	4.37535	1.36815	-4.03634	0.453724	5.78745e-19	6.42116e-18	13.9444	4.36036	-2.34858	0.355006	3.69987e-11	2.97547e-10
FBgn0016123	Alp4	3R	31048929	31052540	+	2412	23.5177	9.75028	15.4093	6.38859	-0.603948	0.398428	0.129563	0.211491	22.537	9.34372	-0.0760803	0.39186	0.846057	0.899106
FBgn0016126	CaMKI	4	445504	453947	+	3382	1260.05	372.574	865.16	255.813	-0.542096	0.0710426	2.33706e-14	1.93416e-13	856.811	253.344	-0.555013	0.072133	1.42271e-14	1.53091e-13
FBgn0016131	Cdk4	2R	16579470	16585448	+	2462	308.174	125.172	359.101	145.858	0.217281	0.104439	0.0374833	0.0731036	349.512	141.963	0.180545	0.106393	0.0897042	0.164976
FBgn0016641	PTP-ER	2R	21619321	21624446	-	5069	920.942	181.681	1076.75	212.419	0.221822	0.0851368	0.00917456	0.020836	1022.21	201.66	0.147507	0.0860253	0.086402	0.159804
FBgn0016650	Lgr1	3R	17725777	17733207	+	3222	0.491696	0.152606	0	0	-1.52465	3.49419	0.662591	NA	0.309586	0.0960852	-0.257722	3.49424	0.941204	NA
FBgn0016660	H15	2L	5404280	5416593	+	3282	0	0	0	0	NA	NA	NA	NA	0	0	NA	NA	NA	NA
FBgn0016672	Ipp	3R	13958789	13960474	+	1402	162.646	116.01	179.327	127.908	0.137453	0.171029	0.421582	0.543654	173.261	123.581	0.0972037	0.173435	0.575165	0.693943
FBgn0016675	Lectin-galC1	2L	19417447	19418274	+	759	1.93985	2.5558	3.99364	5.26171	0.991708	1.09824	0.366529	0.488401	3.77493	4.97356	0.973757	1.11424	0.382164	0.51726
FBgn0016684	NaPi-T	2R	14842720	14845874	-	2660	9.67818	3.63841	21.5644	8.1069	1.12961	0.48763	0.0205289	0.0431421	10.4129	3.91464	0.0806656	0.527706	0.878508	0.920589
FBgn0016685	Nlp	3R	30004785	30010352	+	1080	3728.43	3452.25	10441.6	9668.13	1.48546	0.0818038	1.0925e-73	8.28588e-72	9392.05	8696.34	1.33253	0.0819223	1.72547e-59	1.50328e-57
FBgn0016687	Nurf-38	2R	24558967	24561087	-	1481	1330.43	898.332	2095.58	1414.97	0.654185	0.0751151	3.06282e-18	3.28002e-17	2047.06	1382.21	0.620908	0.0755657	2.09019e-16	2.61129e-15
FBgn0016691	ATPsynO	3R	15265591	15266690	+	802	438.152	546.324	514.145	641.078	0.238649	0.10584	0.0241455	0.0498558	554.858	691.843	0.347414	0.106546	0.00111143	0.00337575
FBgn0016693	Past1	3R	12697322	12704875	+	2896	942.599	325.483	690.027	238.269	-0.449611	0.0908368	7.4344e-07	3.18666e-06	579.566	200.126	-0.700428	0.0928901	4.6855e-14	4.83747e-13
FBgn0016694	Pdp1	3L	7811458	7867369	-	12138	4593.67	378.454	4657.33	383.698	0.0187126	0.0717697	0.794299	0.859321	3966.94	326.82	-0.211672	0.0721371	0.00334293	0.00915665
FBgn0016696	Pitslre	3L	20771528	20776931	+	4544	1802.39	396.654	2509.52	552.272	0.476905	0.0747906	1.8113e-10	1.09703e-09	2160.21	475.397	0.260438	0.0754241	0.000554426	0.00178726
FBgn0016697	Prosalpha5	2R	17412767	17413769	+	945	3158.99	3342.85	4247.78	4495	0.427383	0.0683563	4.04505e-10	2.37904e-09	3418.13	3617.07	0.113277	0.0688626	0.099975	0.180734
FBgn0016698	Ptpa	2L	3377002	3378590	+	1393	76.1941	54.6978	99.7071	71.5772	0.375013	0.196532	0.0563709	0.104334	106.439	76.4098	0.466097	0.198754	0.019022	0.0433318
FBgn0016701	Rab4	2R	17573462	17574979	+	1316	1725.13	1310.89	1859.47	1412.97	0.10816	0.0744143	0.146088	0.233958	1766.82	1342.57	0.0340312	0.0750005	0.650011	0.756529
FBgn0016715	Reg-2	3L	605165	606569	-	883	171.549	194.28	98.6699	111.744	-0.792262	0.182825	1.46796e-05	5.29225e-05	52.7186	59.7039	-1.70884	0.202405	3.10221e-17	4.10815e-16
FBgn0016726	RpL29	2R	21293768	21294404	+	389	210.887	542.126	464.565	1194.26	1.14625	0.1251	5.06311e-20	6.08952e-19	542.411	1394.37	1.36308	0.125357	1.54082e-27	3.80682e-26
FBgn0016754	sba	3R	23894174	23922973	-	6427	1199.56	186.644	825.357	128.42	-0.545651	0.0973854	2.10671e-08	1.06786e-07	826.49	128.597	-0.538775	0.098152	4.03785e-08	2.36881e-07
FBgn0016756	Usp47	3L	5752973	5761886	+	5636	4985.37	884.559	3554.05	630.598	-0.489188	0.0659537	1.19667e-13	9.38409e-13	3942.55	699.529	-0.339094	0.0660736	2.86586e-07	1.50283e-06
FBgn0016762	angel	2R	23694003	23695232	+	1230	73.5211	59.7733	75.1771	61.1196	0.0402009	0.215203	0.851814	0.900269	69.3305	56.3662	-0.0889347	0.221123	0.68754	0.782833
FBgn0016794	dos	3L	2589414	2595590	+	4666	845.158	181.131	838.417	179.687	-0.0123417	0.0949682	0.896601	0.932153	733.997	157.308	-0.203318	0.0963749	0.0348877	0.0733993
FBgn0016797	fz2	3L	19140975	19235373	-	7422	35.534	4.78766	15.3056	2.06219	-1.22336	0.358199	0.000637084	0.00179852	25.19	3.39397	-0.493849	0.344849	0.152123	0.253377
FBgn0016917	Stat92E	3R	20535323	20552311	-	5210	3469.83	665.994	4798.24	920.967	0.466335	0.0668644	3.07317e-12	2.14657e-11	4382.29	841.131	0.335456	0.0671621	5.89196e-07	2.9705e-06
FBgn0016919	nompB	2L	21578292	21589423	-	2794	0	0	0	0	NA	NA	NA	NA	0	0	NA	NA	NA	NA
FBgn0016920	nompC	2L	5346200	5365760	+	6886	4.13902	0.601078	1.57199	0.228288	-1.4802	1.27952	0.247339	0.358896	0	0	-4.46524	1.62425	0.00597568	0.0154599
FBgn0016926	Pino	2L	1114654	1128953	-	2497	1482.12	593.56	1354.64	542.507	-0.133265	0.0743217	0.0729607	0.130088	1285.33	514.749	-0.205801	0.0751279	0.00615624	0.0158722
FBgn0016930	Dyrk2	2L	14184478	14234126	-	4955	2370.48	478.401	3195.04	644.812	0.428496	0.0959703	8.01125e-06	2.99663e-05	1821.53	367.615	-0.3804	0.0970266	8.83362e-05	0.000328844
FBgn0016970	l(2)k10201	2R	9399080	9399899	+	820	30.5416	37.2459	72.3728	88.2595	1.28125	0.26543	1.38558e-06	5.74994e-06	64.4674	78.6188	1.10163	0.271097	4.83228e-05	0.000187697
FBgn0016974	swaPsi	X	6361496	6363310	-	1547	36.1671	23.3789	48.5476	31.3818	0.415802	0.267761	0.120451	0.199058	46.508	30.0634	0.349333	0.273995	0.202323	0.316552
FBgn0016975	stnB	X	22980722	23004648	-	8332	0	0	0	0	NA	NA	NA	NA	0	0	NA	NA	NA	NA
FBgn0016976	stnA	X	22980722	23004648	-	8332	0	0	0	0	NA	NA	NA	NA	0	0	NA	NA	NA	NA
FBgn0016977	spen	2L	159032	203397	+	23035	16186	702.671	27632.3	1199.58	0.771274	0.0855973	2.05121e-19	2.35819e-18	26778.1	1162.49	0.726061	0.0856282	2.26706e-17	3.04689e-16
FBgn0016978	snRNP-U1-70K	2L	6968711	6971737	-	2948	621.978	210.983	990.338	335.935	0.674215	0.0896467	5.44404e-14	4.38761e-13	759.663	257.688	0.289925	0.0915405	0.00153927	0.00455678
FBgn0016983	smid	3L	7381614	7385637	+	3386	2051.71	605.938	2520.03	744.249	0.296246	0.0691919	1.85621e-05	6.6099e-05	2112.29	623.829	0.0403981	0.0699371	0.563511	0.68387
FBgn0016984	sktl	2R	20827282	20836028	-	4106	1180.73	287.561	1869.47	455.302	0.66228	0.0885121	7.29922e-14	5.82734e-13	1837.15	447.43	0.636225	0.088929	8.40978e-13	7.79887e-12
FBgn0017414	cag	2R	10893034	10894414	-	1324	32.9904	24.9172	23.0111	17.38	-0.539474	0.31955	0.0913671	0.157571	31.333	23.6654	-0.0803347	0.315606	0.799078	0.866518
FBgn0017418	ari-1	X	18130392	18137784	-	4815	2262.6	469.906	1641.91	341	-0.464096	0.0945241	9.11626e-07	3.8668e-06	1630.24	338.576	-0.47528	0.0949447	5.56128e-07	2.81809e-06
FBgn0017424	asRNA:CR11538	3L	12129103	12131488	-	2386	0.491696	0.206075	0	0	-1.52464	4.08046	0.708668	NA	0	0	-1.21951	4.08052	0.765046	NA
FBgn0017429	CG5989	3L	8602411	8604149	-	1567	204.97	130.804	149.222	95.2277	-0.442932	0.145944	0.00240584	0.0061372	192.744	123.002	-0.089545	0.145466	0.538176	0.662594
FBgn0017430	Nelf-E	3L	8599442	8600879	-	1227	154.234	125.7	169.822	138.404	0.145215	0.142308	0.307527	0.42592	148.823	121.29	-0.0469419	0.146985	0.749449	0.83095
FBgn0017448	CG2187	3R	31755356	31758637	-	2580	25.468	9.87132	1.27495	0.494166	-4.26038	0.79411	8.0961e-08	3.88299e-07	11.1601	4.32561	-1.18993	0.521014	0.0223785	0.0499132
FBgn0017456	Ubc84D	3R	7518820	7519456	-	637	4.13902	6.49768	5.22038	8.19527	0.413461	0.783184	0.597553	0.701262	8.22746	12.9159	1.01371	0.77051	0.188297	0.299323
FBgn0017457	U2af38	2L	292959	294681	-	1655	1276.37	771.221	1983.25	1198.34	0.636677	0.0736474	5.38402e-18	5.66436e-17	1696.39	1025.01	0.410984	0.0744792	3.42666e-08	2.02822e-07
FBgn0017482	T3dh	2R	22329726	22332072	-	1959	339.781	173.446	207.15	105.743	-0.719463	0.129178	2.55416e-08	1.28377e-07	171.824	87.71	-0.982481	0.134128	2.38953e-13	2.32447e-12
FBgn0017545	RpS3A	4	65225	67207	-	1349	12020	8910.31	12967.3	9612.55	0.109765	0.0794946	0.167345	0.261972	14232.5	10550.4	0.243893	0.0795247	0.00216306	0.00619835
FBgn0017550	Rga	3R	5607275	5613112	-	2902	1545	532.392	1512.23	521.1	-0.0321072	0.0729219	0.659723	0.753768	1268.58	437.141	-0.286626	0.0740975	0.00010963	0.000400752
FBgn0017551	Rca1	2L	6852315	6853866	+	1552	344.618	222.047	549.067	353.78	0.67258	0.119502	1.82134e-08	9.28765e-08	496.843	320.131	0.528029	0.12102	1.2821e-05	5.40946e-05
FBgn0017556	Prosalpha4T2	2R	24500780	24502277	-	1254	0	0	0	0	NA	NA	NA	NA	0	0	NA	NA	NA	NA
FBgn0017558	Pdk	2R	9426439	9434638	+	3164	815.797	257.837	520.147	164.396	-0.652681	0.0859534	3.11552e-14	2.5576e-13	574.889	181.697	-0.506537	0.0866458	5.03328e-09	3.26949e-08
FBgn0017561	Ork1	X	10878054	10891250	-	4482	0.365555	0.0815607	0	0	-1.52465	3.6901	0.679481	NA	0.32456	0.0724141	-0.257722	3.69015	0.944321	NA
FBgn0017566	ND-75	X	8248651	8251687	-	2634	2094.94	795.344	1933.77	734.158	-0.116348	0.0778013	0.134798	0.218877	2147.69	815.372	0.0359989	0.0779866	0.644365	0.753025
FBgn0017567	ND-23	3R	15836048	15837117	-	819	453.804	554.096	500.506	611.119	0.151147	0.106192	0.154639	0.245581	489.998	598.288	0.116375	0.107543	0.2792	0.407796
FBgn0017572	Mo25	3L	16613218	16615472	-	2255	1562.52	692.915	1449.45	642.773	-0.109695	0.0752811	0.145078	0.232596	1373.06	608.895	-0.187754	0.0760356	0.0135381	0.0320069
FBgn0017577	Mcm5	3R	10788524	10791150	+	2452	117.924	48.0929	282.751	115.314	1.26378	0.143558	1.32841e-18	1.45169e-17	208.361	84.9759	0.817621	0.148169	3.42547e-08	2.02822e-07
FBgn0017578	Max	3L	19262232	19264184	-	1289	413.558	320.836	658.072	510.529	0.673745	0.113323	2.75869e-09	1.5033e-08	555.83	431.211	0.424046	0.11504	0.000227737	0.000785923
FBgn0017579	RpL14	3L	8601006	8602392	+	619	2593.44	4189.72	3716.89	6004.67	0.519682	0.0707613	2.07054e-13	1.60144e-12	4182.59	6757.02	0.690406	0.0708508	1.94734e-22	3.67001e-21
FBgn0017581	Lk6	3R	11750931	11764457	-	6807	25658	3769.36	15629.9	2296.14	-0.715456	0.0836406	1.18957e-17	1.22613e-16	20186	2965.48	-0.346214	0.0836276	3.47384e-05	0.000137404
FBgn0017590	klg	3R	22899284	22961731	+	4052	3.38801	0.836134	8.86666	2.18822	1.34316	0.710245	0.0586083	0.107827	11.5296	2.8454	1.70331	0.708422	0.0162003	0.0375011
FBgn0019624	COX5A	3R	11819359	11820299	+	796	2683.44	3371.16	3589.99	4510.04	0.422017	0.0684459	7.01759e-10	4.04766e-09	3367.2	4230.15	0.328354	0.0687953	1.81583e-06	8.6126e-06
FBgn0019637	Atu	3R	5613358	5615939	+	2351	748.977	318.578	688.628	292.909	-0.122691	0.0859349	0.153373	0.243932	642.649	273.351	-0.224975	0.0874381	0.0100833	0.0246728
FBgn0019643	AANAT1	2R	24139563	24157762	+	1887	21.6785	11.4883	12.7007	6.73066	-0.748677	0.42873	0.0807644	0.142082	18.9104	10.0214	-0.159458	0.419273	0.703708	0.794355
FBgn0019644	ATPsynB	3L	9729999	9731224	+	918	1370.18	1492.58	1466.52	1597.51	0.101153	0.0961956	0.293013	0.410347	1699.1	1850.87	0.312616	0.0963026	0.00116962	0.00353627
FBgn0019650	toy	4	989725	1007922	+	3921	7.77932	1.98401	0	0	-5.68818	1.5043	0.000156029	0.000483747	0	0	-5.38302	1.50431	0.0003457	0.00115528
FBgn0019660	lncRNA:roX2	X	11579065	11580432	+	1368	4.27923	3.12809	4.94024	3.61129	0.287639	0.780691	0.712544	0.796917	7.33976	5.36532	0.844461	0.76889	0.27208	0.399807
FBgn0019661	lncRNA:roX1	X	3857230	3862697	-	5468	14247.2	2605.57	6251.82	1143.35	-1.18857	0.190707	4.59298e-10	2.69506e-09	9053.16	1655.66	-0.654241	0.190668	0.00060068	0.00192326
FBgn0019662	qm	3L	7348313	7353622	+	2543	2613.67	1027.79	1434.27	564.008	-0.865991	0.0881028	8.41813e-23	1.19823e-21	1405.9	552.853	-0.895216	0.0886555	5.65567e-24	1.16298e-22
FBgn0019686	lok	2L	20061422	20064381	+	2439	368.513	151.092	284.272	116.553	-0.373256	0.115242	0.00119998	0.00323142	278.319	114.112	-0.406603	0.117441	0.000535794	0.00173113
FBgn0019809	gcm2	2L	9608562	9612706	+	2328	0	0	0	0	NA	NA	NA	NA	0	0	NA	NA	NA	NA
FBgn0019828	dj	3R	7059315	7060524	+	1210	0	0	0	0	NA	NA	NA	NA	0	0	NA	NA	NA	NA
FBgn0019830	colt	2L	2768590	2770069	-	1480	228.347	154.288	229.459	155.04	0.0151043	0.125711	0.904363	0.937957	257.58	174.041	0.180008	0.126657	0.15525	0.257523
FBgn0019890	Smg5	2L	13898828	13904661	-	5096	3930.89	771.368	3316.9	650.882	-0.245882	0.0579536	2.20816e-05	7.76255e-05	3605.42	707.501	-0.1252	0.058135	0.0312706	0.0666077
FBgn0019925	Surf4	3R	15343653	15346176	-	1641	630.669	384.32	827.337	504.166	0.390511	0.0862327	5.9384e-06	2.25783e-05	844.447	514.593	0.42115	0.0870224	1.30126e-06	6.25865e-06
FBgn0019928	Ser8	2R	13434207	13435045	+	839	0	0	0	0	NA	NA	NA	NA	0	0	NA	NA	NA	NA
FBgn0019929	Ser7	X	9865233	9867070	+	1413	0.717048	0.507465	0	0	-2.28696	3.97639	0.5652	NA	0	0	-1.98183	3.97646	0.618208	NA
FBgn0019932	SamDC	2L	10339457	10341503	+	1224	635.101	518.874	616.354	503.558	-0.0388607	0.087032	0.655229	0.750235	611.932	499.944	-0.0489967	0.088268	0.578833	0.697267
FBgn0019936	RpS20	3R	20822181	20823356	+	564	8529.34	15122.9	11646.5	20649.9	0.449846	0.0773021	5.90876e-09	3.12927e-08	11406.8	20224.8	0.419416	0.0773794	5.95153e-08	3.40695e-07
FBgn0019938	RpI1	2R	14595611	14601216	-	5078	383.574	75.5364	907.512	178.714	1.23878	0.10861	3.91307e-30	8.25072e-29	810.413	159.593	1.07178	0.109678	1.48385e-22	2.80183e-21
FBgn0019940	Rh6	3R	15483158	15484699	+	1407	3.63326	2.58228	6.79237	4.82756	0.92523	0.832878	0.266619	0.382071	3.43925	2.44439	-0.0869509	0.903569	0.923337	0.949041
FBgn0019949	Cdk9	2R	22636063	22637727	-	1476	325.057	220.228	195.509	132.459	-0.735773	0.121274	1.30294e-09	7.29577e-09	241.149	163.38	-0.429789	0.121226	0.000392114	0.00129989
FBgn0019952	Orct	3R	24276260	24278792	+	2533	88.2092	34.824	58.1937	22.9742	-0.597651	0.208789	0.00420366	0.0102537	72.8335	28.7538	-0.284222	0.20862	0.173075	0.280467
FBgn0019957	ND-42	3R	22027709	22029393	+	1618	371.26	229.456	349.888	216.247	-0.0815771	0.114437	0.475937	0.594866	369.487	228.36	-0.00430765	0.115585	0.970271	0.980799
FBgn0019960	Mitofilin	3R	22019505	22023335	-	3000	1744.89	581.63	1560.89	520.295	-0.160253	0.064366	0.0127848	0.0281604	1645.69	548.563	-0.0842197	0.0648196	0.193843	0.305983
FBgn0019968	Khc-73	2R	15515778	15532259	-	9177	592.74	64.5897	621.131	67.6835	0.0656468	0.0857108	0.443729	0.564903	578.27	63.0129	-0.0336993	0.0873755	0.699731	0.791631
FBgn0019972	Drice	3R	29799658	29801584	+	1927	509.58	264.442	403.043	209.155	-0.341288	0.101347	0.000758528	0.00211435	404.794	210.065	-0.328687	0.102848	0.0013942	0.00416082
FBgn0019982	Gs1l	2L	4455137	4456807	-	1259	138.988	110.395	94.5336	75.0863	-0.541848	0.18294	0.00305758	0.00763306	95.8361	76.1208	-0.529001	0.186481	0.00455749	0.0121029
FBgn0019985	mGluR	4	936819	949441	+	6351	2.56472	0.40383	0	0	-4.07056	1.94375	0.0362439	0.0710134	0.309586	0.0487461	-2.80362	1.94376	0.149199	0.24972
FBgn0019990	Gcn2	3R	31395660	31402013	+	5743	372.978	64.9448	341.395	59.4455	-0.124165	0.105081	0.237358	0.346789	373.358	65.011	0.00167965	0.106072	0.987366	0.991659
FBgn0020018	Ppox	3R	24660197	24661851	-	1655	88.8341	53.6762	158.272	95.6325	0.833057	0.167183	6.26328e-07	2.71966e-06	173.32	104.725	0.960945	0.168513	1.18067e-08	7.33815e-08
FBgn0020224	Cbl	3L	8424954	8432246	+	6154	650.193	105.654	756.655	122.953	0.218898	0.0849472	0.00996995	0.0224816	711.435	115.605	0.128917	0.0862834	0.135147	0.230909
FBgn0020235	ATPsyngamma	3R	29747704	29749163	-	1460	1794.01	1228.78	2151.8	1473.84	0.260945	0.0671382	0.000101625	0.000323768	1836.52	1257.89	0.0336617	0.0679832	0.620496	0.733488
FBgn0020236	ATPCL	2R	15993531	16001290	-	4339	1839.31	423.903	1792.57	413.131	-0.034593	0.0717914	0.62991	0.728633	1992.58	459.225	0.115761	0.0720129	0.107944	0.192546
FBgn0020238	14-3-3epsilon	3R	18242531	18250550	+	3366	40203.4	11944	44627.4	13258.3	0.150448	0.0762431	0.0484649	0.0914498	40960.3	12168.8	0.0268441	0.0762706	0.724869	0.810652
FBgn0020248	stet	3L	1475438	1489547	-	2550	0.491696	0.192822	0	0	-1.52464	4.08046	0.708668	NA	0	0	-1.21951	4.08052	0.765046	NA
FBgn0020249	stck	3R	8356978	8359964	+	1583	413.261	261.062	351.917	222.31	-0.229247	0.107048	0.0322306	0.0639889	359.647	227.194	-0.201787	0.108576	0.0630993	0.122907
FBgn0020251	sfl	3L	6495680	6550104	+	5772	748.61	129.697	764.456	132.442	0.0285799	0.0890843	0.748348	0.825718	646.704	112.042	-0.210611	0.0909306	0.0205488	0.0464899
FBgn0020255	Ran	X	11144852	11148716	-	1898	6789.55	3577.21	9106.29	4797.83	0.423634	0.0534404	2.24082e-15	1.97858e-14	8246.17	4344.66	0.280457	0.0536433	1.71185e-07	9.25534e-07
FBgn0020257	Ppa	2R	22684955	22688987	-	4033	215.282	53.3801	63.5527	15.7582	-1.77517	0.181323	1.2419e-22	1.74329e-21	263.51	65.3384	0.28737	0.163017	0.0779301	0.146786
FBgn0020258	ppk	2L	14378218	14381172	-	2462	0.365555	0.148479	0.222156	0.0902338	-0.562882	3.12017	0.856838	NA	0.309586	0.125746	-0.257722	3.1202	0.934171	NA
FBgn0020261	pcm	X	19485759	19492011	-	5384	501.993	93.2379	518.79	96.3576	0.0410941	0.100014	0.681157	0.77132	503.222	93.4662	0.00195872	0.101428	0.984593	0.990075
FBgn0020269	mspo	2R	14671396	14713622	-	3131	137.373	43.875	460.777	147.166	1.74329	0.139499	7.77661e-36	2.03695e-34	629.021	200.901	2.18916	0.139043	7.50052e-56	5.86576e-54
FBgn0020270	mre11	2L	11282090	11284335	+	2013	360.373	179.023	347.751	172.753	-0.0482877	0.10925	0.658495	0.753042	410.37	203.86	0.191109	0.109548	0.0810669	0.151524
FBgn0020272	mst	X	21388977	21391533	+	2443	109.285	44.734	109.754	44.9259	0.0104836	0.173805	0.951902	0.968361	106.266	43.4983	-0.0394778	0.17782	0.824306	0.885848
FBgn0020277	lush	3L	19604398	19606090	-	979	0	0	0	0	NA	NA	NA	NA	0	0	NA	NA	NA	NA
FBgn0020278	loco	3R	22619968	22639387	-	7671	855.728	111.554	692.14	90.2281	-0.307588	0.0806137	0.00013586	0.000425632	644.144	83.9713	-0.410706	0.0822138	5.86589e-07	2.95886e-06
FBgn0020279	lig	2R	8067977	8078815	+	6258	11702.2	1869.96	18444.8	2947.4	0.655906	0.0850208	1.21307e-14	1.02056e-13	18734.2	2993.65	0.678472	0.0850569	1.50311e-15	1.75634e-14
FBgn0020280	laf	3R	4876005	4878533	-	2407	0.857251	0.356149	0	0	-2.49598	3.36552	0.458311	NA	0	0	-2.19084	3.36556	0.515074	NA
FBgn0020294	ko	3L	21075581	21131159	-	4710	15.7583	3.3457	2.13689	0.453692	-2.9027	0.716779	5.12953e-05	0.000171575	5.68123	1.20621	-1.48913	0.611604	0.0149001	0.0348839
FBgn0020299	stumps	3R	14577217	14608079	+	5599	3.03652	0.542333	1.15436	0.206173	-1.48784	1.3173	0.258703	0.372631	1.57788	0.281814	-0.929339	1.28582	0.469826	0.603039
FBgn0020300	geko	3L	18139402	18145418	+	1318	2.07303	1.57286	0.355025	0.269366	-2.80911	1.91922	0.143283	0.230154	0.32456	0.246252	-2.50395	1.91923	0.192007	0.303809
FBgn0020304	drongo	2L	833584	851071	-	4423	8488.52	1919.18	7113.86	1608.38	-0.255685	0.0745382	0.000603024	0.00170984	6475.45	1464.04	-0.390837	0.0747203	1.68899e-07	9.15168e-07
FBgn0020305	dbe	2L	868673	869857	-	1185	357.805	301.945	845.512	713.512	1.24311	0.0965153	5.83768e-38	1.64345e-36	781.58	659.562	1.13004	0.0976375	5.59173e-31	1.63826e-29
FBgn0020306	dom	2R	21323430	21341847	+	13020	5461.97	419.506	14031.6	1077.7	1.36061	0.0693267	9.26418e-86	8.71777e-84	11281.3	866.458	1.04591	0.0694782	3.25926e-51	2.18723e-49
FBgn0020307	dve	2R	22243963	22286469	+	4933	0.85022	0.172354	0	0	-2.47285	2.63996	0.348914	0.470356	0.64912	0.131587	-0.341736	2.57819	0.89455	NA
FBgn0020309	crol	2L	11794327	11809438	-	7421	10461.3	1409.69	15862.2	2137.47	0.599954	0.0836918	7.57643e-13	5.57966e-12	15983.3	2153.79	0.611215	0.0837366	2.89351e-13	2.79284e-12
FBgn0020312	Tmtc3	2R	21123735	21128510	-	3572	426.107	119.291	540.99	151.453	0.341503	0.0988015	0.000547325	0.00156082	437.465	122.471	0.0397452	0.10149	0.695343	0.788553
FBgn0020369	Rpt6	X	21316052	21317663	+	1404	782.474	557.318	602.038	428.802	-0.377612	0.100116	0.000162113	0.000500928	663.358	472.477	-0.238212	0.100639	0.0179333	0.0410874
FBgn0020370	TppII	2R	13152885	13159141	-	4813	2406.03	499.902	1964.9	408.248	-0.293095	0.0638793	4.46972e-06	1.73646e-05	1816.09	377.331	-0.407417	0.0646093	2.86588e-10	2.1147e-09
FBgn0020371	Tim17b2	2L	15484729	15485545	+	817	0	0	0	0	NA	NA	NA	NA	0	0	NA	NA	NA	NA
FBgn0020372	TM4SF	2R	23878197	23880860	+	2433	4447.09	1827.82	1505.31	618.703	-1.56128	0.0855316	1.92903e-74	1.49655e-72	1075.29	441.959	-2.04746	0.0870922	3.29292e-122	1.09018e-119
FBgn0020376	Sr-CIII	2L	4120343	4121627	+	1168	2.66393	2.28077	0.963508	0.824921	-1.64956	1.38183	0.232577	0.341413	1.38469	1.18552	-0.996588	1.331	0.454008	0.588593
FBgn0020377	Sr-CII	2R	12208893	12212155	-	2369	0	0	0	0	0	4.08046	1	NA	0.32456	0.137003	0.704067	4.08052	0.86301	NA
FBgn0020378	Sp1	X	9729648	9756369	+	4399	0.491696	0.111775	0.506915	0.115234	0.273046	2.74338	0.920718	NA	0.32456	0.0737804	-0.257723	2.79814	0.926615	NA
FBgn0020379	Rfx	3R	10361760	10378068	-	5557	214.306	38.565	192.974	34.7263	-0.151429	0.136866	0.26855	0.384296	174.911	31.4758	-0.291231	0.140619	0.0383524	0.0797731
FBgn0020381	Dredd	X	633622	635545	-	1708	190.132	111.319	169.478	99.2261	-0.150087	0.152941	0.326425	0.446735	151.042	88.4324	-0.33086	0.15714	0.0352463	0.0740255
FBgn0020385	pug	3R	10696534	10703316	+	3481	22.1957	6.37623	40.6306	11.6721	0.859693	0.318799	0.00700385	0.0163332	32.2714	9.27072	0.518794	0.330744	0.116749	0.205302
FBgn0020386	Pdk1	3L	129450	145895	+	6593	2362.49	358.333	2288.71	347.142	-0.0480363	0.0816096	0.556122	0.666966	1720.31	260.929	-0.459229	0.0825577	2.65901e-08	1.59092e-07
FBgn0020388	Gcn5	3L	12521129	12524014	-	2770	426.731	154.054	393.302	141.986	-0.114344	0.104302	0.272957	0.389506	444.208	160.364	0.0613231	0.104899	0.558822	0.680341
FBgn0020389	Papss	3L	19845293	19860925	+	3029	185.899	61.373	94.5662	31.2203	-0.976556	0.163288	2.22364e-09	1.22156e-08	95.7366	31.6067	-0.94722	0.167076	1.43293e-08	8.83964e-08
FBgn0020391	Nrk	2R	13160063	13163484	+	3235	142.278	43.9807	116.143	35.9021	-0.286999	0.1735	0.0980912	0.167765	100.499	31.0662	-0.507097	0.179435	0.00471232	0.0124874
FBgn0020392	Nmt	3L	8176135	8178429	-	1812	424.116	234.06	426.302	235.266	0.00785551	0.112181	0.944174	0.963708	473.107	261.097	0.158042	0.112797	0.16118	0.265304
FBgn0020399	Mst89B	3R	16267012	16268433	+	1287	2.66393	2.06988	1.68796	1.31154	-0.627237	1.26916	0.621156	0.721876	1.00942	0.784317	-1.43116	1.40767	0.309304	0.442143
FBgn0020407	asun	3R	16264271	16266891	+	2497	180.57	72.3146	189.702	75.9721	0.0795437	0.142403	0.576448	0.683758	193.094	77.3303	0.098414	0.14461	0.496159	0.626364
FBgn0020412	JIL-1	3L	11078752	11093193	-	6634	1369.97	206.507	1926.07	290.333	0.488704	0.0700683	3.06559e-12	2.14422e-11	2013.6	303.528	0.554469	0.0704208	3.44416e-15	3.87839e-14
FBgn0020414	Idgf3	2L	16450907	16455194	+	3954	16334.8	4131.2	17169.4	4342.3	0.0720138	0.060521	0.234087	0.343046	18515.3	4682.67	0.180874	0.0605564	0.00281857	0.00787455
FBgn0020415	Idgf2	2L	16447330	16450508	+	1796	427.941	238.275	66.8695	37.2325	-2.66859	0.147522	3.85665e-73	2.84023e-71	82.3838	45.8707	-2.37609	0.147866	4.19147e-58	3.4983e-56
FBgn0020416	Idgf1	2L	16445278	16446793	+	1445	130.486	90.3017	14.1153	9.76838	-3.18493	0.281776	1.26715e-29	2.60162e-28	15.4769	10.7107	-3.05629	0.291166	8.94105e-26	2.00457e-24
FBgn0020429	GluRIIB	2L	5559342	5563502	+	2949	12.8678	4.36344	10.8897	3.69268	-0.204847	0.546091	0.707575	0.79293	3.28713	1.11466	-1.9433	0.675723	0.00402903	0.010865
FBgn0020440	Fak	2R	19430659	19437259	-	5619	471.56	83.9225	505.752	90.0075	0.103719	0.098759	0.293615	0.411021	505.194	89.9082	0.0993053	0.100055	0.320951	0.454604
FBgn0020443	eRF3	2L	12434452	12441279	+	4409	5971.6	1354.41	8770.23	1989.16	0.554639	0.0681972	4.1925e-16	3.849e-15	8440.78	1914.44	0.499466	0.068324	2.66631e-13	2.57856e-12
FBgn0020445	E23	2L	3334875	3354829	-	5149	132.943	25.8192	504.705	98.02	1.92022	0.11941	3.47473e-58	1.84888e-56	419.999	81.5691	1.65626	0.121621	3.118e-42	1.5033e-40
FBgn0020493	Dad	3R	17054007	17070408	+	3906	685.499	175.499	332.078	85.0173	-1.05112	0.122018	7.02525e-18	7.34544e-17	372.696	95.4162	-0.882803	0.122649	6.11939e-13	5.76694e-12
FBgn0020496	CtBP	3R	13011649	13026275	+	6448	8115.97	1258.68	13624.7	2113.01	0.746915	0.0614745	5.73678e-34	1.40151e-32	13390.5	2076.69	0.722246	0.061556	8.6184e-32	2.6666e-30
FBgn0020497	emb	2L	8403573	8408853	+	4492	2418.51	538.405	3412.97	759.789	0.496263	0.0596748	9.08885e-17	8.79714e-16	3161.75	703.862	0.385556	0.060119	1.42484e-10	1.07862e-09
FBgn0020503	CLIP-190	2L	17384700	17409698	+	8115	1714.82	211.315	2065.74	254.559	0.267198	0.0665923	6.0092e-05	0.000198477	1853.1	228.355	0.110939	0.0673383	0.0994566	0.17996
FBgn0020506	Amyrel	2R	16651095	16652699	-	1549	3.75357	2.42322	2.35904	1.52295	-0.70169	0.926211	0.448695	0.569488	4.91571	3.17348	0.356667	0.872841	0.682813	0.779327
FBgn0020508	Ag5r2	X	14782962	14784052	-	849	0	0	0	0	NA	NA	NA	NA	0	0	NA	NA	NA	NA
FBgn0020509	Acp62F	3L	2739750	2740228	+	479	0	0	0	0	NA	NA	NA	NA	0	0	NA	NA	NA	NA
FBgn0020510	Abi	3R	14119262	14122420	-	2528	1153.33	456.224	1159.03	458.478	0.00262066	0.0904329	0.976881	0.985707	1121.84	443.766	-0.0413178	0.0911367	0.650289	0.756551
FBgn0020513	Paics	X	12757036	12760617	-	2550	489.972	192.146	1315.8	516	1.42761	0.0790461	6.52064e-73	4.76758e-71	1303.02	510.99	1.41384	0.0796875	1.97569e-70	2.48387e-68
FBgn0020518	snoRNA:Me28S-G764	3L	22869545	22869622	-	78	0.85022	10.9003	0.919924	11.7939	0.245794	1.93296	0.898815	0.933632	1.29824	16.6441	0.677372	1.91966	0.724193	0.81041
FBgn0020521	pio	2R	24581245	24597862	+	3600	2.64284	0.734122	0.932206	0.258946	-1.6432	1.52248	0.280457	0.397087	1.6793	0.466472	-0.681891	1.44166	0.63622	0.747007
FBgn0020545	kraken	2L	852768	854539	+	1320	1293.58	979.986	744.651	564.13	-0.793929	0.102582	9.98424e-15	8.45582e-14	751.541	569.349	-0.783932	0.103374	3.36481e-14	3.52896e-13
FBgn0020546	lncRNA:iab4	3R	16850004	16856497	+	6447	0	0	0	0	NA	NA	NA	NA	0	0	NA	NA	NA	NA
FBgn0020556	lncRNA:bxd	3R	16742125	16773189	-	3488	0	0	0	0	0	4.08046	1	NA	0.309586	0.0887576	0.704067	4.08052	0.86301	NA
FBgn0020616	SA	2L	6950421	6954586	+	3634	1739.29	478.616	2533.33	697.118	0.541683	0.0943589	9.4307e-09	4.92772e-08	2142.16	589.478	0.299383	0.0948862	0.001604	0.00472727
FBgn0020617	Rx	2R	20916753	20937030	+	3267	0	0	0.222156	0.0679998	0.398909	2.11162	0.850162	0.899246	3.02825	0.92692	3.77268	1.81733	0.0378986	0.0789614
FBgn0020618	Rack1	2L	7825347	7827315	-	1693	3744.66	2211.85	4311.63	2546.74	0.204427	0.0810308	0.0116413	0.0258264	4700.12	2776.21	0.328162	0.081127	5.23132e-05	0.000202642
FBgn0020620	RN-tre	2R	13984815	13990707	-	5164	1382.62	267.741	1416.93	274.385	0.0340623	0.0655855	0.603512	0.706949	1235.76	239.303	-0.163378	0.0668118	0.0144716	0.0339711
FBgn0020621	Pkn	2R	9252310	9285097	-	8540	801.065	93.8015	1149.35	134.585	0.519383	0.0779628	2.70247e-11	1.74382e-10	909.346	106.481	0.184248	0.0796754	0.0207513	0.0468307
FBgn0020622	Pi3K21B	2L	297880	305233	+	4938	1360.24	275.463	1701.07	344.485	0.318235	0.0838501	0.000147471	0.000459034	1710.58	346.411	0.327462	0.084275	0.00010206	0.000374874
FBgn0020626	Osbp	3R	24934869	24938222	-	3248	850.623	261.891	827.858	254.882	-0.0377846	0.0844289	0.654491	0.74956	941.114	289.752	0.14288	0.0847531	0.0918279	0.168086
FBgn0020633	Mcm7	3L	8891596	8894310	+	2451	208.672	85.1376	446.02	181.975	1.10236	0.117391	5.97445e-21	7.5993e-20	336.998	137.494	0.69626	0.120729	8.06337e-09	5.10423e-08
FBgn0020637	Lcp65Ag2	3L	6132990	6133593	-	543	0	0	0	0	NA	NA	NA	NA	0	0	NA	NA	NA	NA
FBgn0020638	Lcp65Ag1	3L	6134697	6135274	-	517	0	0	0	0	NA	NA	NA	NA	0	0	NA	NA	NA	NA
FBgn0020639	Lcp65Af	3L	6136215	6136791	-	519	0	0	0	0	NA	NA	NA	NA	0	0	NA	NA	NA	NA
FBgn0020640	Lcp65Ae	3L	6137583	6138118	-	476	0	0	0	0	0	4.08046	1	NA	0.309586	0.650392	0.704067	4.08052	0.86301	NA
FBgn0020641	Lcp65Ad	3L	6143395	6144101	+	616	0.358524	0.58202	0	0	-1.52464	4.08046	0.708668	NA	0	0	-1.21951	4.08052	0.765046	NA
FBgn0020642	Lcp65Ac	3L	6144819	6145393	+	505	0	0	0	0	NA	NA	NA	NA	0	0	NA	NA	NA	NA
FBgn0020643	Lcp65Ab2	3L	6146674	6147089	+	416	0	0	0	0	NA	NA	NA	NA	0	0	NA	NA	NA	NA
FBgn0020644	Lcp65Ab1	3L	6149548	6149960	+	413	0	0	0	0	NA	NA	NA	NA	0	0	NA	NA	NA	NA
FBgn0020645	Lcp65Aa	3L	6151304	6151803	+	500	0	0	0	0	NA	NA	NA	NA	0	0	NA	NA	NA	NA
FBgn0020646	Lcp65APsi	3L	6148353	6148615	+	263	0	0	0	0	NA	NA	NA	NA	0	0	NA	NA	NA	NA
FBgn0020647	KrT95D	3R	23997538	24031827	-	5938	351.232	59.1498	363.118	61.1516	0.0463883	0.102841	0.651939	0.747227	298.415	50.2552	-0.237113	0.106544	0.0260477	0.056946
FBgn0020653	Trxr-1	X	8242528	8248033	+	2790	1723.31	617.674	1624.84	582.381	-0.0847272	0.0865802	0.327779	0.447985	1789.16	641.276	0.0552432	0.0867973	0.524475	0.650622
FBgn0020655	ArfGAP1	3L	12415026	12417580	-	2085	413.264	198.208	470.185	225.509	0.181428	0.106614	0.088806	0.154122	420.473	201.666	0.0217389	0.108692	0.841476	0.896077
FBgn0020660	eIF4B	3L	27842669	27858271	-	1922	54.9154	28.572	145.938	75.9303	1.42147	0.192957	1.74812e-13	1.35516e-12	140.443	73.0714	1.36133	0.195759	3.5478e-12	3.14334e-11
FBgn0020762	Atet	2L	4333913	4345776	+	5244	291.247	55.5392	138.179	26.3499	-1.09143	0.151561	5.96668e-13	4.4327e-12	108.615	20.7123	-1.42103	0.158848	3.69035e-19	5.57029e-18
FBgn0020764	Alas	2R	23964772	23966757	+	1842	1064.63	577.976	543.511	295.066	-0.968743	0.0847497	2.93935e-30	6.23646e-29	531.315	288.445	-1.00173	0.0863096	3.83176e-31	1.13943e-29
FBgn0020765	Acp65Aa	3L	6152050	6152745	-	615	0	0	0	0	NA	NA	NA	NA	0	0	NA	NA	NA	NA
FBgn0020767	Spred	2R	14759646	14769423	-	4167	967.891	232.275	920.371	220.871	-0.0732805	0.0793606	0.355806	0.477341	764.243	183.404	-0.339415	0.0811842	2.90484e-05	0.0001161
FBgn0020880	CG7179	2L	7775804	7778029	-	2226	0	0	0	0	0	4.08046	1	NA	0.309586	0.139077	0.704067	4.08052	0.86301	NA
FBgn0020887	Su(z)12	3L	19918242	19923462	-	4098	1252.92	305.739	1224.74	298.863	-0.0348969	0.075108	0.642202	0.739234	1139.42	278.044	-0.137628	0.0760742	0.0704312	0.134913
FBgn0020906	Jon25Bi	2L	4954279	4955144	-	866	0	0	0	0	NA	NA	NA	NA	0	0	NA	NA	NA	NA
FBgn0020907	Scp2	3R	16574543	16583663	-	1283	0.365555	0.284922	0	0	-1.52464	4.08046	0.708668	NA	0	0	-1.21951	4.08052	0.765046	NA
FBgn0020908	Scp1	2R	2932595	2968052	-	1226	9.45402	7.71128	2.30872	1.88313	-2.11906	0.919582	0.0212018	0.0444093	1.98889	1.62226	-2.26272	0.969009	0.0195392	0.0444081
FBgn0020909	Rtc1	X	13757179	13758598	+	1301	72.7326	55.9051	139.124	106.936	0.941771	0.177833	1.1848e-07	5.59274e-07	128.368	98.6689	0.817606	0.181674	6.78245e-06	2.99526e-05
FBgn0020910	RpL3	3R	11221894	11225173	+	2231	5920.91	2653.93	6050.29	2711.92	0.0310242	0.0744214	0.676772	0.767638	6488.15	2908.18	0.13145	0.0745075	0.0776896	0.146416
FBgn0020912	Ptx1	3R	30912754	30930682	+	3571	0.491696	0.137691	0	0	-1.52464	4.08046	0.708668	NA	0	0	-1.21951	4.08052	0.765046	NA
FBgn0020930	Dgkepsilon	2R	12757546	12759724	+	2010	204.439	101.711	170.282	84.7172	-0.264686	0.13862	0.0562061	0.104143	147.168	73.2177	-0.472494	0.143579	0.000998969	0.0030667
FBgn0021738	Crg-1	X	3793223	3797339	+	1230	1.21578	0.988435	0	0	-3.01127	2.28668	0.187881	0.288765	0.64912	0.52774	-0.876345	2.2143	0.692277	0.786513
FBgn0021742	C901	X	10964032	10967134	-	1924	1.34895	0.701116	0	0	-3.13847	2.82933	0.267316	NA	0	0	-2.83333	2.82935	0.316631	NA
FBgn0021750	SerRS-m	3R	15340667	15343218	+	2552	180.946	70.9034	235.034	92.0981	0.388672	0.132644	0.00338765	0.00839928	210.65	82.5432	0.224329	0.136019	0.0990965	0.179417
FBgn0021760	chb	3L	21172853	21183278	+	6205	1248.39	201.19	1369.39	220.692	0.131957	0.0835287	0.114157	0.190135	1363.19	219.692	0.125403	0.084093	0.135897	0.231953
FBgn0021761	Nup154	2L	11004820	11010921	+	5420	864.551	159.511	1169	215.682	0.436623	0.0827695	1.32635e-07	6.21757e-07	1024.55	189.031	0.242973	0.0839332	0.00379354	0.0102803
FBgn0021764	sdk	X	686834	749496	+	9565	1478.95	154.621	1393.48	145.685	-0.0886941	0.0816719	0.277487	0.394034	1338.28	139.914	-0.146538	0.0823503	0.075167	0.142364
FBgn0021765	scu	X	18091259	18092853	+	1134	896.61	790.661	1078.47	951.035	0.265691	0.0964135	0.0058559	0.0138823	1079.57	952.002	0.270429	0.0970086	0.00530867	0.0139081
FBgn0021767	org-1	X	8447691	8455069	-	3417	4382.92	1282.68	5236.97	1532.62	0.256131	0.0633954	5.34029e-05	0.000178004	3673.11	1074.95	-0.255617	0.0640291	6.54611e-05	0.000248731
FBgn0021768	nudC	3L	16804994	16819532	+	1622	1315.55	811.069	1143.02	704.7	-0.20308	0.0722223	0.0049253	0.0118447	905.461	558.237	-0.538072	0.0740775	3.76821e-13	3.61603e-12
FBgn0021776	mira	3R	19931799	19935120	-	3322	16.1566	4.86351	22.7463	6.84718	0.490989	0.402378	0.222382	0.329408	22.8616	6.88188	0.521076	0.408762	0.202391	0.316559
FBgn0021795	Tapdelta	2R	11370300	11371335	-	977	923.737	945.483	1367.13	1399.31	0.568125	0.0718281	2.58404e-15	2.27176e-14	1323.28	1354.44	0.520966	0.0725901	7.13531e-13	6.67935e-12
FBgn0021796	Tor	2L	13004480	13013197	+	7987	700.999	87.7674	779.147	97.5519	0.150787	0.0786897	0.0553367	0.1027	781.803	97.8844	0.155228	0.0797152	0.0515013	0.103106
FBgn0021800	Reph	2L	3803545	3810671	+	4890	906.028	185.282	400.995	82.003	-1.18197	0.110915	1.62632e-26	2.82534e-25	574.248	117.433	-0.660159	0.109966	1.93319e-09	1.30615e-08
FBgn0021814	Vps28	2R	8078869	8080041	-	1173	225.798	192.496	157.67	134.416	-0.50886	0.145188	0.000456874	0.00132097	196.857	167.824	-0.199818	0.145094	0.168463	0.274606
FBgn0021825	DCTN2-p50	2R	8891832	8893339	+	1358	941.118	693.018	977.11	719.521	0.0577427	0.0840343	0.491999	0.610151	960.047	706.956	0.028195	0.0848904	0.739788	0.823323
FBgn0021847	Ttc7	2R	6209782	6214122	-	3079	101.304	32.9015	84.7922	27.5389	-0.243864	0.189987	0.199288	0.302791	94.847	30.8045	-0.0810398	0.191734	0.672538	0.771233
FBgn0021856	l(2)k14505	2L	21261168	21262411	+	1055	255.568	242.244	280.498	265.875	0.13671	0.115997	0.238571	0.348211	269.599	255.544	0.0762359	0.118422	0.519727	0.646534
FBgn0021872	Xbp1	2R	21143545	21145750	+	2142	13736	6412.68	11809	5513.05	-0.218169	0.0759191	0.00405691	0.0099183	9299.44	4341.47	-0.562899	0.0760936	1.38813e-13	1.38284e-12
FBgn0021874	Nle	2L	566366	568121	-	1584	73.2653	46.2533	126.491	79.8557	0.80031	0.197086	4.89248e-05	0.000164208	106.442	67.1984	0.541315	0.202336	0.00746559	0.0188768
FBgn0021875	Zfrp8	2R	24133989	24135405	+	1306	228.76	175.161	304.274	232.982	0.413777	0.115815	0.000353244	0.00103728	271.724	208.058	0.248622	0.118817	0.0363955	0.0761011
FBgn0021895	ytr	2R	23847161	23851480	-	2209	7388.05	3344.52	10753.9	4868.21	0.541067	0.064866	7.34709e-17	7.15901e-16	11006	4982.33	0.574669	0.0649437	8.85172e-19	1.31021e-17
FBgn0021906	RFeSP	2L	1612429	1614160	-	1118	2483.37	2221.26	2424.22	2168.35	-0.0333439	0.063516	0.599605	0.702953	2426.17	2170.1	-0.0318509	0.0639222	0.618289	0.731576
FBgn0021944	Coprox	2L	6964421	6965887	+	1467	785.717	535.594	575.723	392.449	-0.451983	0.104008	1.38856e-05	5.01845e-05	858.755	585.381	0.129444	0.103131	0.209428	0.325361
FBgn0021967	ND-PDSW	2L	3466157	3467334	+	738	509.637	690.565	537.125	727.812	0.080419	0.112649	0.475296	0.594368	563.979	764.199	0.154299	0.113411	0.173664	0.281054
FBgn0021979	l(2)k09913	2R	23067196	23071875	+	2411	3005.55	1246.6	2898.56	1202.22	-0.0514426	0.0737482	0.485463	0.604035	2845.96	1180.41	-0.0781071	0.0740711	0.29166	0.421777
FBgn0021995	Rs1	2R	8163564	8167769	+	2731	899.376	329.321	1914.86	701.158	1.08894	0.0728462	1.59189e-50	6.97344e-49	1763.91	645.885	0.969203	0.0735127	1.08247e-39	4.65415e-38
FBgn0022023	eIF3h	2L	5051193	5053094	-	1496	4438.19	2966.7	4605.72	3078.69	0.0520084	0.0715427	0.467253	0.587056	4969.18	3321.64	0.162061	0.0716543	0.0237154	0.0525176
FBgn0022027	Vps25	2R	8625451	8626180	+	678	83.2867	122.842	111.371	164.263	0.418439	0.184056	0.0229996	0.0477391	120.549	177.802	0.542586	0.185835	0.00350353	0.00955964
FBgn0022029	l(2)k01209	2R	17420407	17425679	+	3254	615.879	189.268	751.541	230.959	0.284728	0.0879457	0.00120562	0.00324404	673.638	207.018	0.126412	0.0895117	0.157879	0.260864
FBgn0022069	Nnp-1	2L	13363308	13366189	-	2882	1741.93	604.418	3307.5	1147.64	0.925682	0.0742352	1.09395e-35	2.84344e-34	2743.07	951.794	0.654851	0.0747822	2.00923e-18	2.89632e-17
FBgn0022097	Vha36-1	2R	15541435	15542498	+	1064	563.066	529.197	450.589	423.486	-0.31955	0.0969588	0.000981671	0.00268408	528.721	496.918	-0.0871519	0.097247	0.370151	0.504991
FBgn0022153	l(2)k05819	2L	4394196	4400487	+	5246	1068.29	203.638	1169.52	222.935	0.130703	0.0749749	0.0812828	0.142884	1070.73	204.104	0.00267417	0.0760625	0.971954	0.98174
FBgn0022160	Gpo1	2R	15857752	15862755	-	2929	429.501	146.637	44.4478	15.1751	-3.26188	0.163391	1.14149e-88	1.11548e-86	117.556	40.1354	-1.86625	0.141774	1.42308e-39	6.06611e-38
FBgn0022213	Cse1	2L	16821156	16825207	-	3237	1519.15	469.309	2158.81	666.915	0.50881	0.0750368	1.19506e-11	7.90718e-11	2331.12	720.148	0.618137	0.0752672	2.16502e-16	2.70138e-15
FBgn0022224	ubl	2R	6810011	6810530	-	396	10.4714	26.4429	15.6314	39.4733	0.613674	0.483199	0.204076	0.307583	18.4602	46.6168	0.838374	0.485168	0.0839868	0.156038
FBgn0022238	lolal	2R	18154095	18158192	-	2402	4896.09	2038.34	5293.98	2203.99	0.111771	0.0695696	0.10814	0.181808	5184.32	2158.33	0.0816979	0.0697589	0.24154	0.363868
FBgn0022288	l(2)09851	2R	5754517	5756327	+	1811	388.952	214.772	695.388	383.98	0.838873	0.106336	3.04858e-15	2.66633e-14	640.727	353.798	0.715561	0.107605	2.93285e-11	2.39155e-10
FBgn0022338	dnk	3R	18980995	18982749	+	1393	350.275	251.454	478.762	343.691	0.453362	0.106308	2.00249e-05	7.09353e-05	441.669	317.063	0.332463	0.108149	0.00211127	0.00606394
FBgn0022343	CG3760	2R	24938181	24939769	+	1258	409.324	325.377	672.32	534.435	0.715786	0.115666	6.07732e-10	3.53138e-09	635.659	505.294	0.636532	0.11673	4.95253e-08	2.86813e-07
FBgn0022344	CG10340	3R	16613398	16614391	-	938	483.991	515.981	616.403	657.146	0.352935	0.099076	0.000367672	0.00107746	578.492	616.729	0.261	0.100489	0.00939613	0.0231799
[truncated: 15,563 more rows]

## Sheet: Filtered
FB gene ID	Gene Name	Chromosome	Refeq Gene Start	RefSeq Gene End	Strand	Gene Length	WT Mean Normalized Count	WT Mean Normalized Count per Kb	KO1 Mean Normalized Count	KO1 Mean Normalized Count per Kb	KO1_v_WT log2 Fold Change	KO1_v_WT log2 Fold Change StdErr	KO1_v_WT p-value	KO1_v_WT padj	KO2 Mean Normalized Count	KO2 Mean Normalized Count per Kb	KO2_v_WT log2 Fold Change	KO2_v_WT log2 Fold Change StdErr	KO2_v_WT p-value	KO2_v_WT padj
FBgn0033367	PPO2	2R	9042261	9044709	-	2280	1.21578	0.533235	2.29644	1.00721	1.00675	0.970876	0.29976	0.417667	410.154	179.892	8.42864	0.84402	1.74984e-23	3.48985e-22
FBgn0267228	lncRNA:CR45668	X	5882480	5899989	-	1833	1.81371	0.989478	51.5671	28.1326	4.69434	0.663601	1.50486e-12	1.08313e-11	567.483	309.593	8.16115	0.656242	1.66236e-35	6.18375e-34
FBgn0266046	lncRNA:CR44811	2R	24351477	24369689	-	1231	0.983392	0.798856	1.64899	1.33956	1.21531	1.17521	0.301079	0.418815	146.568	119.064	7.52357	1.04198	5.18181e-13	4.91554e-12
FBgn0037164	CG11438	3L	22465619	22468076	+	2458	0.365555	0.148721	14.478	5.89015	5.07826	1.22898	3.595e-05	0.000122604	42.7877	17.4075	6.63354	1.2198	5.38179e-08	3.09328e-07
FBgn0002576	lz	X	9284649	9303636	+	3468	10.4374	3.00964	4.0157	1.15793	-1.33168	0.467232	0.00436992	0.0106095	918.614	264.883	6.42447	0.297487	1.9657e-103	4.88084e-101
FBgn0036610	CG13058	3L	16328841	16329534	+	606	0	0	9.23766	15.2437	5.39159	1.27513	2.35489e-05	8.2413e-05	18.9819	31.3232	6.42445	1.26559	3.84921e-07	1.98496e-06
FBgn0033635	Prip	2R	11436243	11442216	+	1609	3.00137	1.86536	0.888622	0.552282	-1.64824	1.43123	0.249475	0.361428	196.293	121.997	6.00404	1.21369	7.53969e-07	3.74234e-06
FBgn0031630	CG15629	2L	4813009	4815891	+	1432	2.66393	1.86029	19.61	13.6941	2.81271	0.604806	3.30967e-06	1.3088e-05	151.995	106.142	5.7758	0.584391	4.91079e-23	9.4891e-22
FBgn0000427	44531	X	7867161	7873222	-	5748	21.2591	3.69852	125.49	21.8319	2.57698	0.227927	1.22337e-29	2.52192e-28	894.135	155.556	5.40824	0.219642	7.16354e-134	3.0934e-131
FBgn0050104	NT5E-2	2R	17485002	17493169	+	2062	0.358524	0.173872	0.444311	0.215476	0.270885	1.68312	0.872139	0.914522	16.042	7.77982	5.22388	1.34587	0.000103844	0.000381147
FBgn0002937	ninaB	3R	13700565	13703164	+	2164	0.491696	0.227216	0.222156	0.10266	-0.562884	1.76206	0.749388	0.82628	16.0232	7.40441	5.21047	1.32708	8.62721e-05	0.000321884
FBgn0005677	dac	2L	16466512	16485998	-	4982	8.82093	1.77056	248.607	49.9011	4.77172	0.337827	2.67318e-45	9.98808e-44	331.701	66.58	5.18657	0.337545	2.78596e-53	1.96243e-51
FBgn0267180	asRNA:CR45620	X	7959274	7960898	+	1625	0	0	5.44716	3.3521	4.63748	1.35562	0.000624045	0.00176465	8.03959	4.94744	5.18251	1.34966	0.000123108	0.00044706
FBgn0033644	Tret1-2	2R	11675935	11678014	+	1695	0.358524	0.211519	12.5442	7.40073	4.86104	1.26528	0.000122104	0.000385627	15.4001	9.08562	5.15856	1.26529	4.56273e-05	0.000177644
FBgn0266898	lncRNA:CR45358	2L	17575152	17575490	-	339	0	0	1.14208	3.36897	2.50027	1.58997	0.115827	0.192407	7.22916	21.325	5.03559	1.47458	0.000637956	0.00203213
FBgn0037163	laza	3L	22458816	22461131	-	2316	6.70375	2.89454	83.416	36.0172	3.70707	0.396563	8.93119e-21	1.12755e-19	199.836	86.2849	4.97118	0.392361	8.68167e-37	3.38143e-35
FBgn0266419	lncRNA:CR45059	X	20739538	20740308	+	771	0.358524	0.465012	13.3092	17.2623	4.93937	1.26774	9.77076e-05	0.000313151	12.6008	16.3435	4.87442	1.27256	0.000127934	0.000463062
FBgn0003892	ptc	2R	8649649	8665223	+	5521	5.11538	0.926532	44.5693	8.07269	3.21981	0.466628	5.19436e-12	3.54773e-11	135.388	24.5223	4.82001	0.458502	7.56505e-26	1.70764e-24
FBgn0263652	lncRNA:CR43643	3R	26018027	26019309	-	1283	0	0	1.57199	1.22525	2.70817	1.59516	0.0895559	0.154999	6.04152	4.7089	4.76969	1.50661	0.00154632	0.00457495
FBgn0264675	lncRNA:CR43960	X	12043698	12116041	+	1595	0.358524	0.22478	7.44352	4.66678	4.13333	1.3171	0.00169992	0.00446146	11.6271	7.28973	4.75655	1.31136	0.000286522	0.000972569
FBgn0053502	CG33502	X	21609357	21611526	-	1060	0	0	0	0	0	4.08046	1	1	5.84208	5.5114	4.72367	3.92211	0.228447	0.348531
FBgn0035358	CG14949	3L	2642184	2643424	-	934	1.0826	1.1591	0.888622	0.951415	-0.180463	1.18592	0.879052	0.918805	31.0234	33.2156	4.71702	0.945511	6.07377e-07	3.05645e-06
FBgn0263764	lncRNA:CR43681	2L	11387870	11392320	-	3635	0	0	0	0	0	1.95796	1	1	5.84833	1.60889	4.71637	1.60198	0.00323909	0.0088992
FBgn0050099	CG30099	2R	16288208	16288969	-	762	0	0	6.17161	8.09923	4.83464	1.39345	0.000521334	0.00149164	5.57981	7.32258	4.66624	1.40564	0.000901305	0.00278351
FBgn0266047	CG44812	2R	24350969	24351389	-	297	0	0	0	0	0	2.00239	1	1	5.57448	18.7693	4.64458	1.65784	0.00508522	0.0133898
FBgn0265877	CG44666	2R	20779992	20783216	-	3123	0	0	0	0	0	1.97188	1	1	5.30596	1.69899	4.58624	1.62245	0.0047026	0.012465
FBgn0036362	CG10725	3L	13437954	13439009	+	876	0.365555	0.417301	10.1585	11.5965	4.54624	1.32539	0.000603314	0.00170984	9.62859	10.9915	4.50123	1.33103	0.000720242	0.00227527
FBgn0032650	CG7094	2L	17554354	17555765	-	1412	0.724079	0.512804	22.1826	15.7101	4.8199	1.09502	1.07426e-05	3.94283e-05	17.6889	12.5276	4.49589	1.10124	4.45387e-05	0.000173747
FBgn0053287	CG33287	3L	20966766	20970663	-	3434	0.983392	0.286369	12.6305	3.67807	3.96477	1.11326	0.000368872	0.00108067	17.9671	5.23212	4.47034	1.11055	5.68936e-05	0.000218764
FBgn0267598	lncRNA:CR45936	3L	18243700	18244239	+	540	0.365555	0.676954	10.0324	18.5785	4.55851	1.29684	0.000439611	0.00127511	9.08475	16.8236	4.3941	1.30494	0.000759152	0.00238453
FBgn0267530	asRNA:CR45870	3L	8184252	8185221	+	970	0	0	1.62997	1.68039	2.8649	1.60936	0.0750512	0.133184	3.97198	4.09483	4.17039	1.55385	0.00727663	0.018446
FBgn0261514	NimA	2L	13957539	13963381	+	2877	3.73951	1.29979	1.15436	0.401238	-1.87755	0.903293	0.0376578	0.0733594	69.7917	24.2585	4.15351	0.553762	6.35573e-14	6.51446e-13
FBgn0053302	Cpr31A	2L	10054213	10055935	+	1229	0	0	0.830638	0.675865	1.87572	1.77455	0.290508	0.408245	3.89132	3.16625	4.14777	1.62282	0.0105911	0.025801
FBgn0031568	CG10019	2L	3730466	3754617	+	6367	90.1643	14.1612	1247.01	195.855	3.7788	0.120263	1.03745e-216	7.02909e-214	1468.44	230.634	4.01598	0.120333	3.27426e-244	4.64571e-241
FBgn0036577	CG13073	3L	16213051	16217303	-	1500	0	0	0.951226	0.634151	2.18992	1.78991	0.221148	0.32792	3.53103	2.35402	4.01093	1.68516	0.0173057	0.0397687
FBgn0001180	hb	3R	8690980	8697822	-	3835	0.358524	0.0934874	3.82485	0.997353	3.17406	1.40869	0.0242469	0.0500063	6.89881	1.79891	4.00899	1.3926	0.00399217	0.0107775
FBgn0267696	lncRNA:CR46032	3L	14420602	14421294	-	693	1.21578	1.75437	17.0592	24.6164	3.84479	0.932076	3.70776e-05	0.00012628	19.1079	27.5727	3.99113	0.934031	1.92841e-05	7.90792e-05
FBgn0028979	tio	2L	22019208	22025734	+	5708	4.34448	0.761121	34.3862	6.02422	2.88371	0.495647	5.95319e-09	3.15116e-08	74.8171	13.1074	3.98884	0.488565	3.23032e-16	3.97566e-15
FBgn0265583	lncRNA:CR44410	2L	17589471	17589700	-	230	0.358524	1.5588	4.8264	20.9843	3.53811	1.39884	0.0114286	0.0254156	6.74135	29.3102	3.96359	1.3954	0.00450485	0.0119952
FBgn0029965	Ir7b	X	7864948	7866968	-	1968	0	0	0	0	0	2.1451	1	1	3.33784	1.69605	3.91556	1.85025	0.0343246	0.0723191
FBgn0031258	CG4297	2L	458876	472200	-	6869	21.2251	3.08999	280.441	40.8271	3.70532	0.229362	1.04952e-58	5.82854e-57	310.586	45.2157	3.85954	0.229814	2.6903e-63	2.81264e-61
FBgn0266535	lncRNA:CR45096	3L	13208543	13208958	-	416	0	0	0	0	0	2.19529	1	1	3.07896	7.40134	3.79236	1.9131	0.0474441	0.0960291
FBgn0262893	CG43248	3L	15530085	15531473	-	846	0	0	1.17338	1.38698	2.4918	1.75879	0.156552	0.248173	3.07896	3.63943	3.7894	1.69313	0.025214	0.0553917
FBgn0032649	CG15145	2L	17529311	17532234	-	2787	21.9492	7.87557	275.108	98.711	3.62714	0.225371	2.80523e-58	1.50844e-56	304.358	109.206	3.77825	0.225851	8.06974e-63	8.26275e-61
FBgn0052602	Muc12Ea	X	14277735	14288161	+	10181	0.358524	0.035215	2.70179	0.265376	2.69896	1.48436	0.0690233	0.123959	5.85366	0.574959	3.77572	1.45572	0.0094947	0.0233999
FBgn0020617	Rx	2R	20916753	20937030	+	3267	0	0	0.222156	0.0679998	0.398909	2.11162	0.850162	0.899246	3.02825	0.92692	3.77268	1.81733	0.0378986	0.0789614
FBgn0003028	ovo	X	5048273	5070929	+	7400	0.857251	0.115845	0.444311	0.060042	-0.633926	1.59492	0.691024	0.779626	10.9273	1.47666	3.7672	1.24074	0.00239534	0.00680311
FBgn0039481	Cpr97Eb	3R	27089704	27091130	-	1054	12.974	12.3093	185.2	175.712	3.82384	0.28774	2.67443e-40	8.1135e-39	176.378	167.342	3.75214	0.289279	1.79441e-38	7.39503e-37
FBgn0016075	vkg	2L	5012144	5028191	-	6503	28.8725	4.43987	196.431	30.2061	2.74297	0.206021	1.91841e-40	5.83736e-39	376.709	57.9285	3.68297	0.203482	3.20452e-73	4.35991e-71
FBgn0266587	lncRNA:CR45112	2L	17584725	17585095	-	371	0.85022	2.2917	5.97864	16.1149	2.86217	1.19145	0.0162938	0.0350612	10.0942	27.208	3.65438	1.1796	0.00194849	0.0056421
FBgn0266169	lncRNA:CR44875	2L	10053604	10054100	+	497	0	0	1.42684	2.8709	2.74788	1.85679	0.138898	0.224351	2.80511	5.64408	3.64769	1.82128	0.0451965	0.0920427
FBgn0035428	CG14960	3L	3271036	3276255	+	1444	1.70044	1.17759	13.8695	9.60492	3.1235	0.84668	0.000225035	0.000680461	20.168	13.9668	3.6448	0.843228	1.54315e-05	6.41548e-05
FBgn0036769	Tsp74F	3L	17891820	17895862	-	1519	1.44816	0.953363	3.76686	2.47983	1.25502	0.938954	0.181347	0.280053	19.3982	12.7704	3.63603	0.875853	3.30428e-05	0.00013122
FBgn0083983	mRpL34	2R	16098948	16099337	+	327	0.358524	1.0964	1.72388	5.27181	1.95123	1.57139	0.214341	0.31964	5.35667	16.3812	3.63518	1.50355	0.0156176	0.036335
FBgn0000490	dpp	2L	2428372	2459823	+	5214	9.47392	1.81702	3.51341	0.673841	-1.45705	0.540404	0.00701303	0.0163509	117.505	22.5365	3.62735	0.370626	1.27926e-22	2.42473e-21
FBgn0267257	lncRNA:CR45693	2L	14509913	14512083	-	2171	0	0	2.08657	0.961109	3.19041	1.81109	0.0781376	0.137985	2.73943	1.26183	3.621	1.80405	0.0447338	0.0911938
FBgn0002578	Kaz-m1	3R	26014721	26016487	+	1705	0	0	0.355025	0.208226	0.398909	2.14235	0.852287	0.900487	2.71866	1.59452	3.61387	1.86019	0.0520471	0.104052
FBgn0267076	asRNA:CR45520	X	5663114	5665605	+	2492	6.66275	2.67366	121.383	48.7091	4.17064	0.418438	2.12186e-23	3.14351e-22	81.7971	32.8239	3.60935	0.422938	1.41384e-17	1.9236e-16
FBgn0031849	CG11327	2L	6684842	6686712	-	1808	0	0	1.0841	0.59961	2.2848	1.89102	0.226955	0.334912	2.6979	1.4922	3.60574	1.81918	0.0474717	0.0960654
FBgn0034998	CG13577	2R	24267377	24269179	-	1744	0	0	1.05279	0.603666	2.25713	1.79865	0.209514	0.31424	2.68872	1.54169	3.6005	1.72064	0.0363908	0.0761011
FBgn0050158	CG30158	2R	6891760	6922613	+	3657	0.365555	0.0999604	2.13689	0.584328	2.30856	1.53136	0.131678	0.214428	5.13885	1.40521	3.59304	1.48804	0.0157521	0.0365878
FBgn0065053	snoRNA:Me18S-C1831	2L	4457603	4457674	-	72	0	0	2.00402	27.8336	3.21369	1.63161	0.0488798	0.0921453	2.65298	36.8469	3.58802	1.62729	0.0274608	0.0597068
FBgn0037040	CG12983	3L	20962655	20966762	-	3696	1.92579	0.521048	16.463	4.45427	3.05864	0.762483	6.0356e-05	0.00019922	23.502	6.35877	3.56907	0.759392	2.60276e-06	1.21137e-05
FBgn0264090	CG43759	X	18930335	19028629	+	6340	69.022	10.8867	158.433	24.9895	1.20256	0.157745	2.4705e-14	2.04293e-13	811.36	127.975	3.55547	0.148938	5.95194e-126	2.27364e-123
FBgn0032648	CG15144	2L	17525585	17529122	-	3362	23.2072	6.90279	233.455	69.4394	3.32441	0.227172	1.70734e-48	7.02498e-47	270.931	80.5862	3.53435	0.227493	1.97826e-54	1.4773e-52
FBgn0011822	Pgcl	X	436139	437448	-	1310	2.79008	2.12983	3.60731	2.75367	0.334582	0.769269	0.66361	0.756403	30.5732	23.3384	3.46119	0.674376	2.8602e-07	1.50066e-06
FBgn0264815	Pde1c	2L	11814156	11928572	-	7968	15.7571	1.97754	18.4403	2.3143	0.214631	0.334809	0.521488	0.636161	173.011	21.7132	3.45087	0.292637	4.27652e-32	1.33567e-30
FBgn0032666	CG5758	2L	18119995	18129862	+	3655	6.81702	1.86512	129.278	35.3701	4.25659	0.392321	1.99899e-27	3.6408e-26	73.712	20.1674	3.44923	0.398702	5.09888e-18	7.20371e-17
FBgn0032647	CG15143	2L	17520892	17524549	-	3513	36.0781	10.2699	343.418	97.7564	3.21544	0.185126	1.41844e-67	9.42195e-66	400.617	114.038	3.4332	0.185366	1.39406e-76	2.03614e-74
FBgn0261788	Ank2	3L	7655389	7718395	-	46942	10.915	0.232522	8.64912	0.184251	-0.373942	0.420859	0.374261	0.495779	119.219	2.53972	3.42822	0.342959	1.58679e-23	3.17102e-22
FBgn0032089	Rcd-1r	2L	9012885	9014068	-	1184	0	0	0.577181	0.487484	1.31375	2.03405	0.518356	0.634018	2.3941	2.02205	3.42713	1.84555	0.0633164	0.123233
FBgn0036972	CR6434	3L	20322377	20323209	-	659	1.7145	2.60167	1.54069	2.33792	-0.223187	1.10589	0.84006	0.891555	17.2649	26.1986	3.41496	0.926725	0.000228726	0.000788515
FBgn0265921	lncRNA:CR44710	X	20758489	20759626	+	1062	1.44816	1.36361	21.2606	20.0194	3.74459	0.821912	5.21494e-06	2.003e-05	16.8297	15.8472	3.41397	0.830776	3.96728e-05	0.000155805
FBgn0036422	CG3868	3L	14400769	14402725	-	1181	0	0	1.14208	0.967045	2.45726	1.85002	0.184101	0.283745	2.32842	1.97157	3.39755	1.80424	0.0596884	0.117135
FBgn0030976	CG7378	X	18900410	18911843	+	3832	6.58583	1.71864	5.61899	1.46633	-0.261441	0.570612	0.646826	0.743063	70.2544	18.3336	3.38966	0.485034	2.77863e-12	2.47955e-11
FBgn0265977	lncRNA:CR44756	2R	22318995	22320895	-	1742	0	0	0	0	0	2.40658	1	1	2.30766	1.32472	3.38671	2.16942	0.118498	0.20735
FBgn0033997	Ir51a	2R	15204654	15206334	+	1681	0	0	0.830638	0.494133	1.88058	1.89623	0.321321	0.441056	2.27771	1.35497	3.37559	1.79062	0.0594096	0.116681
FBgn0052260	CG32260	3L	4142364	4145966	+	1967	0	0	1.97272	1.00291	3.19015	1.75098	0.0684671	0.123178	2.21203	1.12457	3.3479	1.75903	0.0570052	0.112537
FBgn0038837	KaiR1D	3R	20860187	20866231	-	3607	0	0	0	0	0	2.54143	1	1	2.227	0.61741	3.34257	2.32015	0.149678	0.250296
FBgn0266568	lncRNA:yar	X	362399	367072	+	1966	2.31244	1.17622	7.0848	3.60366	1.58835	0.769742	0.0390672	0.0758288	23.984	12.1994	3.34027	0.736455	5.74376e-06	2.56276e-05
FBgn0266197	asRNA:CR44892	X	498097	499456	-	1300	0.491696	0.378228	2.98655	2.29734	2.83511	1.47747	0.0549983	0.102147	4.34725	3.34404	3.3343	1.4694	0.0232587	0.0516098
FBgn0003460	so	2R	7419350	7434872	+	2786	1.20874	0.433864	4.9022	1.75959	1.98424	1.06482	0.0623993	0.113833	11.9758	4.29858	3.329	1.03548	0.00130469	0.00391604
FBgn0265534	lncRNA:CR44384	X	15807453	15807949	-	497	7.5411	15.1732	57.584	115.863	2.92444	0.396131	1.5535e-13	1.20982e-12	74.7152	150.332	3.31167	0.395384	5.48383e-17	7.13832e-16
FBgn0037325	CG12147	3R	5425369	5427257	-	1889	0	0	1.0841	0.573899	2.28459	1.87439	0.222903	0.330084	2.13523	1.13035	3.24366	1.82232	0.0750822	0.142258
FBgn0031001	CG7884	X	19220622	19235910	+	3960	18.6745	4.71578	57.3846	14.4911	1.59187	0.276526	8.57856e-09	4.4917e-08	178.762	45.142	3.23694	0.265498	3.43134e-34	1.18746e-32
FBgn0039851	mey	3R	31499235	31506992	+	3385	0	0	3.76686	1.11281	4.08497	1.55761	0.0087266	0.0199031	2.13523	0.630791	3.23117	1.61567	0.0455119	0.092571
FBgn0265308	lncRNA:CR44281	2R	8650697	8651496	-	603	0.358524	0.594567	0	0	-1.52467	2.00467	0.44692	0.567896	4.03766	6.69596	3.2259	1.6747	0.0540726	0.107431
FBgn0265152	lncRNA:CR44221	2L	228037	228588	+	552	0.491696	0.890754	2.49191	4.51434	2.50699	1.50159	0.0950079	0.163185	3.97198	7.19562	3.20949	1.48283	0.0304307	0.0651796
FBgn0034022	CG12964	2R	15485953	15497231	-	3942	0	0	0.830638	0.210715	1.88179	1.9315	0.329926	0.450435	2.00386	0.508336	3.1791	1.84003	0.084034	0.156038
FBgn0013725	phyl	2R	14427336	14432337	-	1839	5.13648	2.79308	57.0344	31.0138	3.55892	0.488133	3.07922e-13	2.34062e-12	43.4271	23.6145	3.17877	0.494222	1.2605e-10	9.64504e-10
FBgn0085414	dpr12	2R	5804712	5860831	+	4704	0	0	0.222156	0.0472269	0.398911	2.44696	0.8705	0.913757	1.98889	0.422807	3.17001	2.22516	0.154267	0.25626
FBgn0029082	hbs	2R	15011396	15042134	+	5478	1.0826	0.197628	10.1966	1.86136	3.1243	0.987038	0.00154911	0.00409349	10.1299	1.8492	3.0986	0.994053	0.00182617	0.00531113
FBgn0037166	CG11426	3L	22470556	22473509	+	1882	0.365555	0.194238	2.62478	1.39468	2.56069	1.57456	0.103889	0.175648	3.65661	1.94294	3.0883	1.5641	0.0483252	0.0975168
FBgn0267627	lncRNA:CR45965	3L	22359458	22360868	-	1411	0.365555	0.259075	0.222156	0.157445	-0.562884	1.99493	0.777823	0.846681	3.64742	2.58499	3.08415	1.66839	0.0645196	0.125197
FBgn0266815	lncRNA:CR45277	2R	14433430	14433895	-	466	0	0	1.17338	2.51799	2.42206	3.81702	0.525728	0.639758	1.87635	4.0265	3.07496	3.80276	0.418737	0.553634
FBgn0032789	CG13083	2L	19487490	19488691	+	1145	0.358524	0.313122	2.83466	2.47568	2.73555	1.52819	0.0734437	0.130742	3.51605	3.07079	3.05128	1.52741	0.0457516	0.0929357
FBgn0002592	E(spl)m2-BFM	3R	26016514	26017470	-	957	12.5022	13.064	24.8329	25.9487	0.979125	0.36451	0.0072282	0.0168178	101.476	106.035	3.03946	0.341426	5.47255e-19	8.14893e-18
FBgn0040795	CG13038	3L	16327258	16327893	-	509	3.90664	7.67513	11.9404	23.4585	1.70306	0.626175	0.00653236	0.0153074	29.3161	57.5954	3.01842	0.606641	6.50335e-07	3.25725e-06
FBgn0266045	lncRNA:CR44810	2R	24325027	24330277	+	1468	1.07557	0.732679	3.96141	2.69851	1.81625	1.19284	0.127852	0.209202	9.34362	6.36487	3.01037	1.16555	0.00980084	0.0240588
FBgn0034665	CG4372	2R	21837605	21838798	-	1194	0	0	0.355025	0.297341	0.39891	2.46902	0.871648	0.91429	1.77493	1.48654	2.98728	2.25992	0.186217	0.296823
FBgn0003053	peb	X	4617564	4627206	+	7446	36.9635	4.96421	4.20444	0.564657	-3.32897	0.438645	3.2189e-14	2.64033e-13	295.321	39.6618	2.9688	0.216403	7.82887e-43	3.94702e-41
FBgn0000357	Cp18	3L	8726791	8727613	+	649	0.491696	0.757621	0.951226	1.46568	1.23572	1.72609	0.474049	0.593101	3.36778	5.18919	2.96344	1.62211	0.0677143	0.130489
FBgn0267145	lncRNA:CR45585	3R	5015624	5021474	+	753	1.44816	1.92319	7.63529	10.1398	2.27038	0.910909	0.0126872	0.0279757	12.1937	16.1934	2.95488	0.901251	0.00104306	0.0031876
FBgn0265872	lncRNA:CR44661	X	15079956	15080425	+	470	4.14605	8.82139	26.211	55.7681	2.68581	0.573575	2.83279e-06	1.12724e-05	30.9915	65.9394	2.95009	0.574009	2.75541e-07	1.44798e-06
FBgn0032637	CG5050	2L	17452924	17458775	+	1314	21.7719	16.5692	11.5464	8.7872	-0.90687	0.34045	0.0077278	0.0178738	165.773	126.159	2.94353	0.267266	3.28987e-28	8.35677e-27
FBgn0037405	CG1077	3R	6167483	6170309	+	2302	96.5295	41.9329	1325.05	575.606	3.77866	0.126458	3.49721e-196	1.69248e-193	735.339	319.435	2.93233	0.128483	2.73427e-115	8.22934e-113
FBgn0259150	OtopLc	X	5650567	5662861	-	8159	3.9008	0.478098	31.7394	3.89011	3.01355	0.558245	6.72887e-08	3.25181e-07	30.127	3.69248	2.92665	0.563062	2.01721e-07	1.0818e-06
FBgn0265653	lncRNA:CR44460	2R	19868745	19869495	+	690	0	0	1.7116	2.48058	2.98927	1.93131	0.121671	0.200575	1.6793	2.43377	2.92141	1.95505	0.1351	0.230895
FBgn0261675	Npc1b	X	20934869	20939503	+	3971	0	0	1.54069	0.387985	2.73545	1.9037	0.150743	0.240427	1.6793	0.422891	2.92125	1.91172	0.126494	0.21857
FBgn0085447	sif	3L	5657913	5749599	+	23781	0	0	1.30625	0.0549284	2.57298	1.8442	0.162962	0.256495	1.65854	0.0697421	2.91071	1.84108	0.113882	0.201045
FBgn0267951	lncRNA:CR46231	3L	10797626	10798408	+	783	0	0	1.05279	1.34456	2.25617	1.89694	0.234293	0.3432	1.64356	2.09906	2.90159	1.86666	0.120083	0.209533
FBgn0261830	CG42762	2L	8143401	8144047	-	593	0	0	0.355025	0.598693	0.398909	2.35621	0.86556	0.910964	1.64356	2.77161	2.89907	2.14194	0.175902	0.28366
FBgn0267781	lncRNA:CR46112	3R	30106997	30107532	+	536	0	0	0.222156	0.414469	0.398909	2.39217	0.867562	0.912359	1.64356	3.06635	2.89881	2.18146	0.183901	0.293744
FBgn0001269	inv	2R	11474465	11509695	+	5919	0	0	1.27495	0.215399	2.54804	1.86502	0.171867	0.267979	1.62859	0.275146	2.89271	1.86131	0.120154	0.209621
FBgn0036138	CG14143	3L	11134987	11135480	+	494	0	0	2.14917	4.35055	3.22846	1.83156	0.0779541	0.137758	1.60783	3.25471	2.8819	1.87296	0.123879	0.215175
FBgn0032946	nrv3	2L	21380000	21393319	+	4770	60.854	12.7577	678.177	142.175	3.48683	0.161476	2.06958e-103	2.66242e-101	445.897	93.4794	2.87974	0.163708	2.90007e-69	3.55599e-67
FBgn0003285	rst	X	2950399	2973834	-	6251	140.622	22.4959	296.422	47.42	1.08258	0.117931	4.32044e-20	5.22721e-19	1031.89	165.076	2.87917	0.112588	3.07199e-144	1.60584e-141
FBgn0262690	asRNA:CR43160	2R	20896994	20898629	+	1495	0.731111	0.489037	0	0	-2.37466	1.84226	0.197402	0.301004	5.70199	3.81404	2.87468	1.45916	0.0488277	0.0983286
FBgn0032897	CG9336	2L	20858695	20861014	+	804	1.08963	1.35527	8.09096	10.0634	2.79374	1.0201	0.00616849	0.0145453	8.5274	10.6062	2.86853	1.02579	0.00516745	0.0135883
FBgn0063378	snoRNA:U31:54Ed	2R	17702411	17702477	+	67	0	0	2.32774	34.7424	3.40557	1.73657	0.0498685	0.0937675	1.57788	23.5504	2.86761	1.79027	0.109206	0.194519
FBgn0038606	CG15803	3R	18330932	18360728	-	5268	15.5259	2.9472	178.898	33.9594	3.50211	0.273605	1.64253e-37	4.54852e-36	115.42	21.9096	2.86759	0.278793	8.17353e-25	1.75713e-23
FBgn0030807	CG13000	X	16947964	16948471	-	508	0	0	0.697769	1.37356	1.73647	2.18842	0.427497	0.549203	1.59285	3.13554	2.86637	2.11012	0.174339	0.281826
FBgn0036351	CG14107	3L	13380359	13381346	-	925	0	0	0.666467	0.720504	1.68228	2.33717	0.471653	0.591119	1.59285	1.722	2.86359	2.25742	0.20461	0.319527
FBgn0265276	l(3)neo38	3R	11765038	11779128	-	6563	34.9923	5.33176	320.522	48.8378	3.19278	0.195556	6.3731e-60	3.61842e-58	253.899	38.6864	2.86021	0.198013	2.71248e-47	1.58473e-45
FBgn0037162	CG11449	3L	22454373	22455989	+	1617	1.44113	0.891235	14.3108	8.8502	3.19438	0.872869	0.000252576	0.000757877	11.306	6.99193	2.85443	0.885346	0.00126376	0.00380123
FBgn0004893	bowl	2L	3771700	3784121	+	4280	58.1445	13.5852	59.0667	13.8006	-0.00701536	0.19373	0.971113	0.981698	422.837	98.7937	2.85148	0.171838	7.69821e-62	7.72309e-60
FBgn0087007	bbg	3L	14412828	14536276	-	10028	467.262	46.5957	3986.74	397.561	3.09303	0.0770074	0	0	3355.16	334.579	2.84483	0.0774243	1.48695e-295	2.95368e-292
FBgn0031296	CG4415	2L	1037246	1038685	+	1395	0.358524	0.257007	0	0	-1.52467	2.12612	0.473303	0.592532	3.10891	2.22861	2.84116	1.83284	0.121108	0.210878
FBgn0263846	CG43707	2L	3757256	3769525	+	8942	0.983392	0.109975	1.23599	0.138223	0.62494	1.46779	0.670276	0.762056	6.02655	0.67396	2.84062	1.35489	0.0360316	0.0754514
FBgn0028371	jbug	2R	22717321	22740459	-	10434	0.365555	0.035035	0.253458	0.0242915	-0.562884	2.04289	0.782907	0.85089	3.09393	0.296524	2.83384	1.73592	0.102581	0.184505
FBgn0265764	lncRNA:CR44571	2R	19860195	19860695	+	321	0.491696	1.53176	5.40358	16.8336	3.68317	1.43166	0.0100924	0.0227124	3.02825	9.4338	2.80855	1.47579	0.0570299	0.112564
FBgn0033072	CG17994	2R	6207219	6209468	-	1762	0.491696	0.279056	1.17338	0.665937	1.53744	1.7018	0.366305	0.488294	3.01328	1.71014	2.80485	1.63587	0.0864211	0.159809
FBgn0031697	CG14024	2L	5311311	5314895	-	2616	36.3854	13.9088	284.384	108.71	2.95323	0.189541	9.80642e-55	4.88543e-53	257.009	98.245	2.80343	0.191429	1.4549e-48	8.86507e-47
FBgn0038198	Npc2b	3R	14089517	14092425	+	922	1.34895	1.46307	4.99823	5.42107	2.07169	1.06525	0.0518001	0.0969154	8.36994	9.07803	2.7774	1.05248	0.00831716	0.0207605
FBgn0052115	CG32115	3L	12912027	12913646	-	1560	0.717048	0.459646	3.22098	2.06473	2.04144	1.31617	0.12089	0.199643	5.30596	3.40125	2.76954	1.29894	0.0329939	0.0698351
FBgn0041096	rols	3L	12008225	12064859	-	7556	17.8781	2.36608	37.1946	4.92253	1.06383	0.313672	0.000694994	0.00194955	119.94	15.8735	2.76734	0.298055	1.62217e-20	2.68971e-19
FBgn0051559	CG31559	3R	6150116	6157235	-	2003	10.4362	5.2103	77.441	38.6625	2.90695	0.348335	7.10385e-17	6.92864e-16	69.8463	34.8709	2.76163	0.35208	4.37282e-15	4.86348e-14
FBgn0031632	CG15628	2L	4821774	4828945	+	3932	1.56727	0.398593	2.08657	0.530663	0.300889	1.1195	0.788106	0.854349	10.4245	2.6512	2.71838	1.01556	0.00743438	0.0188219
FBgn0010388	Dro	2R	14745961	14746714	+	754	5.70629	7.56803	11.6243	15.4169	1.04367	0.537923	0.0523585	0.097888	36.6635	48.6254	2.71109	0.509384	1.02473e-07	5.69215e-07
FBgn0000299	Col4a1	2L	5029609	5037279	+	6165	67.4137	10.9349	188.055	30.5036	1.4656	0.167417	2.05537e-18	2.21984e-17	440.557	71.4609	2.69977	0.163026	1.34703e-61	1.33787e-59
FBgn0266262	lncRNA:CR44957	X	4311989	4315059	-	1350	1.09667	0.812345	5.56101	4.11927	2.222	1.09489	0.0424145	0.0814702	7.52377	5.57316	2.69148	1.08958	0.0135042	0.0319494
FBgn0085352	CG34323	X	12070437	12071263	+	772	1.22281	1.58395	0	0	-3.0036	1.66519	0.0712698	0.127453	7.69088	9.96227	2.67829	1.21502	0.0275018	0.0597698
FBgn0036474	Or71a	3L	15076907	15078447	-	1433	0	0	0.577181	0.402778	1.33129	2.35107	0.571223	0.679862	1.4354	1.00167	2.67248	2.23712	0.232239	0.353393
FBgn0035477	CG14982	3L	3942710	3947278	+	4282	26.4468	6.17626	22.0194	5.14231	-0.267511	0.290667	0.357398	0.478744	168.743	39.4075	2.66942	0.251335	2.38018e-26	5.48491e-25
FBgn0004839	otk	2R	12001473	12019846	-	4769	1.80668	0.378839	82.5409	17.3078	5.38448	0.699919	1.43725e-14	1.20618e-13	12.6703	2.65681	2.66021	0.734064	0.000290134	0.000983822
FBgn0085420	DIP-delta	3L	5424109	5442399	+	4805	0.365555	0.0760781	0.475613	0.0989829	0.257149	1.94365	0.894745	0.931213	2.71866	0.565799	2.65059	1.71931	0.123156	0.214047
FBgn0041336	Cyp6t2Psi	2L	21282811	21284273	-	1463	0.491696	0.336088	4.03934	2.761	3.25498	1.47347	0.0271709	0.0552276	2.71866	1.85828	2.64667	1.51377	0.0803951	0.150515
FBgn0000278	CecB	3R	30213315	30213797	-	425	0.85022	2.00052	5.26397	12.3858	2.71819	1.25485	0.0302999	0.0607972	5.02632	11.8266	2.64585	1.2673	0.0368182	0.0769201
FBgn0034224	insb	2R	17475214	17476272	-	1059	0	0	0.475613	0.449115	1.19288	2.36955	0.614668	0.717371	1.39966	1.32168	2.64537	2.24039	0.237697	0.35966
FBgn0086519	Cpr47Eg	2R	11277957	11278445	-	421	0	0	0.577181	1.37098	1.33064	2.33657	0.569027	0.678043	1.39966	3.32461	2.64508	2.22395	0.234297	0.356034
FBgn0265098	lncRNA:CR44203	2R	7429496	7429995	-	500	0	0	0.729071	1.45814	1.77505	2.23213	0.426482	0.548375	1.39966	2.79932	2.64419	2.17658	0.224428	0.343561
FBgn0267915	lncRNA:CR46196	2L	7094515	7095248	+	463	0	0	1.05279	2.27385	2.25524	2.02149	0.264579	0.379522	1.39966	3.02302	2.64043	2.01365	0.189769	0.301131
FBgn0265381	lncRNA:CR44322	3R	23372006	23372649	-	644	0.724079	1.12435	3.25995	5.06203	2.05173	1.37163	0.134697	0.218784	4.93455	7.66234	2.63913	1.35997	0.0523101	0.104473
FBgn0264436	lncRNA:CR43854	2L	15129701	15130205	+	505	0	0	0.506915	1.00379	1.2417	2.36245	0.599169	0.702753	1.38469	2.74195	2.63309	2.2392	0.239634	0.361838
FBgn0264873	asRNA:CR44064	2L	1500830	1504204	+	1166	0	0	3.06909	2.63216	3.77655	1.66753	0.0235274	0.0487309	1.39966	1.20039	2.63125	1.76118	0.13517	0.230909
FBgn0052845	CG32845	3L	271420	273391	-	1972	0	0	0.577181	0.292688	1.32571	2.23525	0.553119	0.663991	1.38469	0.702173	2.63121	2.11793	0.214108	0.331337
FBgn0050398	CG30398	2R	21717804	21718832	+	1029	0	0	0.830638	0.807228	1.88481	2.03249	0.35375	0.475298	1.38469	1.34566	2.62865	1.98694	0.185849	0.296427
FBgn0003174	pwn	2R	7282572	7300806	+	5810	28.71	4.94148	82.099	14.1306	1.50169	0.240735	4.43355e-10	2.60301e-09	178.923	30.7956	2.62844	0.234379	3.46272e-29	9.27e-28
FBgn0051914	tRNA:Asp-GTC-1-1	2L	5241106	5241177	-	72	0	0	0.475613	6.60574	1.19261	2.37575	0.615671	0.71813	1.36971	19.0238	2.62086	2.24883	0.243843	0.366725
FBgn0036102	CG12523	3L	10801190	10802350	+	1161	0	0	0.697769	0.601007	1.7324	2.24518	0.440346	0.561862	1.36971	1.17977	2.62022	2.18678	0.230835	0.351634
FBgn0263971	CG43725	2L	11075513	11075962	+	450	0	0	1.0841	2.4091	2.28619	2.0195	0.25761	0.371502	1.36971	3.04381	2.61804	2.01643	0.194166	0.306347
FBgn0038697	CG3581	3R	19373757	19374789	-	1033	0	0	1.27495	1.23422	2.54524	1.96582	0.195407	0.2985	1.36971	1.32596	2.61755	1.98452	0.187175	0.298063
FBgn0035412	CG14957	3L	3187563	3188106	+	423	0	0	1.43912	3.40218	2.66784	1.92858	0.166567	0.260915	1.36971	3.23809	2.6171	1.95684	0.181088	0.290514
FBgn0265049	lncRNA:CR44164	2R	6681796	6682394	+	599	0.365555	0.610276	1.85213	3.09204	2.10446	1.64993	0.202138	0.305613	2.61724	4.36935	2.61404	1.63733	0.110372	0.195997
FBgn0260002	snoRNA:Me28S-U2134b	3R	5625178	5625254	+	77	0.983392	12.7713	4.33176	56.2567	2.41375	1.26485	0.0563494	0.104313	5.04708	65.5465	2.60698	1.26871	0.0398962	0.0825518
FBgn0267270	lncRNA:CR45706	2L	3264168	3265714	-	1547	1.08963	0.704353	2.28878	1.4795	1.0094	1.18576	0.394617	0.516683	7.11662	4.60027	2.60028	1.12459	0.0207663	0.046854
FBgn0259110	mmd	X	15946936	15973159	-	7792	8.26398	1.06057	14.5995	1.87365	0.850599	0.473881	0.0726594	0.129596	48.5399	6.22945	2.59919	0.447089	6.11522e-09	3.92861e-08
FBgn0052814	CG32814	X	1019795	1026700	-	1664	0	0	1.54069	0.925894	2.73245	1.87323	0.144654	0.232136	1.33398	0.801668	2.59366	1.90921	0.174306	0.281818
FBgn0027563	CG9631	3R	14225098	14226762	-	1449	0	0	0.608483	0.419933	1.37804	2.233	0.537152	0.650122	1.33398	0.920618	2.59332	2.12722	0.222801	0.341533
FBgn0266168	lncRNA:CR44874	2L	10051362	10052289	+	928	0.358524	0.386341	3.50112	3.77276	3.04534	1.60326	0.0575025	0.106138	2.54237	2.73963	2.5861	1.63709	0.114176	0.201386
FBgn0031675	CG9121	2L	5047818	5051062	-	2717	0.717048	0.263912	4.69907	1.72951	2.56802	1.28391	0.0454832	0.0864981	4.67181	1.71947	2.58155	1.29427	0.0460871	0.0935302
FBgn0003386	Shaw	2L	3718185	3729145	+	5000	12.3761	2.47522	141.833	28.3666	3.52626	0.320549	3.79095e-28	7.21488e-27	73.3333	14.6667	2.57525	0.329	4.97627e-15	5.4977e-14
FBgn0043532	Obp56i	2R	19864717	19868714	+	1026	0	0	2.99883	2.92284	3.75368	1.69042	0.0263812	0.0538487	1.30403	1.27098	2.57519	1.78768	0.149719	0.250296
FBgn0260499	qvr	2R	11442505	11451604	+	5103	0.358524	0.0702575	0	0	-1.52467	2.29361	0.506213	0.623669	2.53659	0.497077	2.57207	2.0362	0.206526	0.32186
FBgn0001216	Hsc70-1	3L	13974061	13977761	+	2718	0	0	0.799336	0.29409	1.84823	2.25543	0.412526	0.534937	1.28327	0.472136	2.55327	2.21618	0.249277	0.372696
FBgn0038865	cDIP	3R	21159238	21161092	-	1855	0.365555	0.197065	0.222156	0.11976	-0.562882	2.25765	0.803112	0.865549	2.57618	1.38878	2.55303	1.9965	0.200985	0.314806
FBgn0053061	CG33061	3L	16329795	16331227	+	1288	0	0	1.75056	1.35913	3.00994	1.85768	0.105175	0.177397	1.26829	0.984699	2.54979	1.91582	0.183217	0.292842
FBgn0039770	CG15537	3R	30435177	30443599	-	1600	0	0	0.830638	0.519149	1.88718	2.12629	0.374786	0.496224	1.26829	0.792683	2.54397	2.09021	0.223572	0.342408
FBgn0026592	Fie	3L	3892574	3894833	+	1600	37.7492	23.5933	193.955	121.222	2.34097	0.202501	6.54654e-31	1.42468e-29	223.207	139.504	2.54345	0.202976	5.06631e-36	1.91325e-34
FBgn0023001	melt	3L	7134516	7143074	+	4372	0	0	0.982528	0.224732	2.19363	2.16464	0.310873	0.42915	1.26829	0.290094	2.54212	2.15998	0.239229	0.361372
FBgn0037144	CG7458	3L	21955110	21958041	+	2166	2.77601	1.28163	17.4142	8.0398	2.65243	0.693257	0.000130216	0.000409679	16.1415	7.4522	2.5356	0.700995	0.000297878	0.00100802
FBgn0036725	CG18265	3L	17439401	17457461	+	8834	16.0375	1.81543	53.0503	6.00524	1.74338	0.305507	1.1531e-08	5.9669e-08	91.8675	10.3993	2.52998	0.300499	3.7894e-17	4.99156e-16
FBgn0031126	Cyp6v1	X	20657122	20661425	+	3026	34.81	11.5036	194.984	64.4362	2.48483	0.203903	3.67671e-34	9.0257e-33	200.229	66.1694	2.51865	0.205316	1.35873e-34	4.85427e-33
FBgn0259994	OtopLa	X	5625676	5648487	-	7548	111.739	14.8039	957.423	126.845	3.07513	0.127735	4.64247e-128	9.43628e-126	649.818	86.0915	2.51419	0.129594	7.63231e-84	1.37826e-81
FBgn0033885	DJ-1alpha	2R	13942534	13943377	-	735	1.70747	2.32309	6.72673	9.15201	2.05627	0.956734	0.0316136	0.0629856	9.03018	12.286	2.5022	0.952431	0.00860972	0.0214047
FBgn0264998	lncRNA:CR44149	2L	9568155	9568785	-	631	0.491696	0.779233	0.253458	0.401676	-0.562884	2.09657	0.788331	0.854501	2.3941	3.79414	2.46493	1.81711	0.174938	0.282472
FBgn0033856	CG13334	2R	13558545	13560768	+	2224	0.365555	0.164368	1.985	0.892536	2.16559	1.63115	0.184294	0.284	2.3941	1.07648	2.46123	1.6314	0.131385	0.225607
FBgn0015400	kek2	2L	11581937	11626883	+	6939	2.17927	0.314061	2.26976	0.327102	-0.0961542	0.950775	0.919445	0.946864	12.8128	1.84649	2.45669	0.837139	0.00333949	0.00914975
FBgn0085479	CG34450	X	9329016	9330487	-	1472	0.358524	0.243563	1.43912	0.977664	1.69077	1.69408	0.318258	0.437621	2.34339	1.59198	2.44248	1.66167	0.141589	0.23969
FBgn0029839	CG4660	X	6078708	6081372	-	1275	0.365555	0.28671	1.0841	0.850271	1.32085	1.75078	0.450588	0.571202	2.32842	1.82621	2.4362	1.68516	0.148268	0.248362
FBgn0038405	CG8927	3R	16181020	16186235	+	1454	0.358524	0.246578	0.608483	0.418489	0.387121	1.9566	0.84316	0.894097	2.32842	1.60139	2.43587	1.76893	0.168504	0.274628
FBgn0029751	CG17764	X	5306261	5307417	-	1157	1.21578	1.0508	8.69945	7.51897	2.86998	1.02941	0.00530358	0.0126705	6.47669	5.59783	2.42673	1.05034	0.0208653	0.047056
FBgn0085319	CG34290	3R	24288553	24289818	-	932	0.358524	0.384683	0	0	-1.52467	2.2211	0.492431	0.610388	2.27771	2.44389	2.41114	1.96236	0.219187	0.33694
FBgn0010053	Jheh1	2R	18853434	18855087	-	1486	64.4662	43.3824	293.434	197.466	2.19576	0.157608	4.06322e-44	1.45917e-42	334.646	225.199	2.38537	0.158074	1.87833e-51	1.26909e-49
FBgn0085295	CG34266	3L	4677832	4678233	+	402	1.58133	3.93366	7.13512	17.7491	2.19097	0.957969	0.0221903	0.0462795	8.33806	20.7415	2.37412	0.96134	0.0135266	0.0319901
FBgn0035952	CG5280	3L	8989069	8990228	-	986	0.365555	0.370746	0.355025	0.360066	-0.562883	2.23516	0.801172	0.86418	2.19705	2.22825	2.37106	1.98043	0.23121	0.352097
FBgn0052984	CG32984	2L	8964957	8967035	+	1960	10.6346	5.42584	19.7457	10.0743	0.865642	0.414959	0.0369702	0.0722138	55.7217	28.4295	2.34721	0.395498	2.94172e-09	1.95302e-08
FBgn0029679	CG2901	X	3828197	3831546	+	2721	0.983392	0.361408	1.17338	0.431232	0.569514	1.51789	0.707512	0.79293	4.23086	1.55489	2.33021	1.42099	0.101036	0.182353
FBgn0053519	Unc-89	2R	23995543	24014254	-	13261	696.611	52.5308	5250.43	395.93	2.91051	0.0791471	4.90569e-296	8.30943e-293	3511.12	264.77	2.32941	0.0797126	1.00276e-187	8.29955e-185
FBgn0263626	lncRNA:CR43635	3R	5045207	5045948	-	687	2.817	4.10044	5.44716	7.92891	1.14367	0.839222	0.172955	0.269221	12.4883	18.178	2.31835	0.811032	0.00425631	0.0114253
FBgn0051313	CG31313	3R	14566432	14567429	-	793	11.1603	14.0735	15.0628	18.9947	0.44115	0.428947	0.303739	0.422086	55.4976	69.9844	2.31358	0.399082	6.74055e-09	4.31083e-08
FBgn0050403	CG30403	2R	21709895	21711613	-	1268	19.3052	15.2249	118.528	93.4761	2.63032	0.277071	2.23861e-21	2.92806e-20	95.3603	75.2053	2.31151	0.281627	2.25467e-16	2.80971e-15
FBgn0262788	CG43169	3L	8888145	8888633	-	416	0	0	0.729071	1.75257	1.76438	2.48705	0.478059	0.596672	1.12581	2.70627	2.30727	2.4629	0.348855	0.483374
FBgn0266679	lncRNA:CR45169	3L	10850070	10850690	-	540	0.85022	1.57448	3.4821	6.44834	2.10695	1.33497	0.114503	0.190613	3.93625	7.28934	2.3005	1.3396	0.0859243	0.159098
FBgn0029170	TwdlT	3R	27049220	27051004	+	1607	0.724079	0.450578	0	0	-2.36396	1.90946	0.215706	0.32144	3.79376	2.36077	2.28791	1.56339	0.14335	0.24197
FBgn0062565	Or19b	X	20094398	20095767	+	1164	4.61785	3.96723	0.444311	0.38171	-3.16695	1.20458	0.00856103	0.019565	22.9673	19.7314	2.27677	0.652468	0.000483964	0.00157701
FBgn0036563	CG13075	3L	16083993	16085264	+	1149	0.358524	0.312031	1.37652	1.19801	1.65406	1.86529	0.375208	0.496598	2.12025	1.8453	2.275	1.84263	0.216963	0.334711
FBgn0265584	lncRNA:CR44411	2L	17588203	17588720	-	518	1.79965	3.47423	5.55335	10.7207	1.50662	0.972102	0.121176	0.199985	9.37743	18.1031	2.26658	0.957388	0.0179103	0.0410535
FBgn0039774	CDase	3R	30459521	30465736	+	2951	27.6227	9.36047	268.041	90.8305	3.23821	0.220944	1.22854e-48	5.07549e-47	136.395	46.22	2.26212	0.227625	2.84633e-23	5.57588e-22
FBgn0053128	CG33128	2L	1494070	1495456	+	1387	2.19917	1.58556	8.07868	5.82457	2.01856	0.868386	0.0200986	0.0423342	9.77879	7.05031	2.26097	0.869932	0.00934897	0.0230884
FBgn0005558	ey	4	697689	721173	+	3720	8.63657	2.32166	9.49878	2.55344	0.18358	0.488923	0.707305	0.792802	40.1888	10.8034	2.25479	0.444488	3.92043e-07	2.01959e-06
FBgn0052706	CG32706	X	9087129	9088073	+	872	2.29135	2.62769	6.01206	6.89456	1.38917	0.845993	0.100577	0.171102	11.1355	12.77	2.24909	0.82841	0.00662864	0.0169767
FBgn0265763	lncRNA:CR44570	2R	19859695	19860095	-	401	0	0	1.05279	2.62542	2.25482	2.09151	0.280996	0.397702	1.0751	2.68105	2.24531	2.12167	0.289931	0.419766
FBgn0033855	link	2R	13555949	13557342	+	1394	0.491696	0.352723	0.577181	0.414046	0.354275	2.06888	0.864035	0.91025	2.05457	1.47387	2.24319	1.89702	0.237015	0.358955
FBgn0266596	asRNA:CR45121	3L	9695043	9695650	+	555	0.365555	0.658658	0.222156	0.40028	-0.562882	2.27961	0.80497	0.86669	2.04878	3.69149	2.2429	2.03763	0.27101	0.398294
FBgn0265997	lncRNA:CR44772	2L	2757940	2758176	-	237	0.491696	2.07467	2.60484	10.9909	2.60978	1.70256	0.125312	0.205576	2.05457	8.66907	2.24033	1.73927	0.197715	0.310992
FBgn0034218	CG18467	2R	17440297	17442483	+	1462	0	0	0.86194	0.589562	1.93241	2.29662	0.400116	0.521933	1.06013	0.725121	2.23611	2.29584	0.330066	0.46427
FBgn0015524	otp	2R	20883625	20903414	-	3368	2.67097	0.793042	1.4971	0.444508	-0.808435	0.974382	0.406714	0.528978	12.8896	3.82709	2.23503	0.80394	0.00543432	0.0141961
FBgn0259098	CG42246	X	7411267	7411906	-	578	0.365555	0.632449	0.577181	0.998582	0.350312	2.01018	0.861654	0.908567	2.03381	3.5187	2.23287	1.83308	0.223187	0.341949
FBgn0030009	CG15336	X	8147949	8148705	+	757	0.358524	0.473612	0.830638	1.09728	0.917443	1.85944	0.621731	0.722143	2.03381	2.68667	2.23215	1.76319	0.205524	0.320651
FBgn0031181	Ir20a	X	21477254	21478945	-	1692	0.358524	0.211894	2.67511	1.58103	2.63541	1.59927	0.0993761	0.169598	2.03381	1.20201	2.23044	1.64026	0.173891	0.281343
FBgn0000287	salr	2L	11358873	11373636	+	5536	0.365555	0.0660324	0	0	-1.52467	2.25317	0.498611	0.61647	2.01883	0.364673	2.22576	2.00902	0.267912	0.394558
FBgn0263981	asRNA:CR43730	2R	16288927	16291474	-	1433	1.44113	1.00567	11.8511	8.27012	2.90979	0.915503	0.00148115	0.00391902	7.2649	5.06971	2.22546	0.940861	0.0180134	0.0412519
FBgn0030895	CG7135	X	18103653	18105393	+	1518	0.491696	0.32391	0.444311	0.292695	0.209091	2.05975	0.919143	0.946864	2.01883	1.32993	2.22524	1.86613	0.23309	0.354525
FBgn0263997	CG43740	X	10333652	10347794	+	1878	0.365555	0.194651	1.18566	0.631344	1.38823	1.76896	0.432586	0.554814	2.01883	1.07499	2.22451	1.72465	0.19711	0.310302
FBgn0267203	lncRNA:CR45643	3R	16223395	16223854	+	460	0.365555	0.794685	2.94085	6.39314	2.73536	1.64886	0.0971278	0.166354	2.01883	4.38877	2.2243	1.69321	0.188961	0.300137
FBgn0054001	CG34001	3L	10631079	10634612	+	587	0.85022	1.44842	2.71407	4.62363	1.74025	1.36267	0.201571	0.30507	3.76381	6.41195	2.21094	1.35409	0.102513	0.184416
FBgn0032835	CG16772	2L	19962679	19963844	+	1095	0.983392	0.898075	1.15436	1.05421	0.372721	1.56214	0.811418	0.871257	3.9063	3.5674	2.20896	1.45117	0.127959	0.220564
FBgn0042173	CG18853	2R	7829062	7830429	+	1157	0.358524	0.309874	1.27495	1.10194	1.58946	1.77332	0.37008	0.491522	1.9831	1.714	2.20877	1.74876	0.206573	0.321883
FBgn0264483	asRNA:CR43891	3L	16213928	16214376	+	449	0.358524	0.798495	0.253458	0.564493	-0.562883	2.28138	0.805118	0.86669	1.98889	4.42959	2.20868	2.04163	0.279331	0.407868
FBgn0263018	snRNA:U4atac	3R	5195004	5195163	-	160	0.365555	2.28472	2.86596	17.9122	2.74563	1.56531	0.0794223	0.139915	1.95315	12.2072	2.1979	1.61446	0.173393	0.280722
FBgn0010452	trn	3L	13114271	13118077	+	3365	5.72035	1.69996	4.39437	1.3059	-0.321318	0.642213	0.616843	0.719332	25.8285	7.67563	2.19714	0.560748	8.92016e-05	0.000331568
FBgn0066101	LpR1	3R	25741348	25763105	-	6638	10.0707	1.51712	64.1888	9.66991	2.69747	0.376325	7.61391e-13	5.59914e-12	45.4175	6.84204	2.19079	0.384919	1.25873e-08	7.78921e-08
FBgn0259739	CG42393	3L	18042733	18044214	+	1142	0.365555	0.320101	2.25748	1.97678	2.42036	1.64185	0.140438	0.226443	1.93818	1.69718	2.18918	1.67466	0.191131	0.302714
FBgn0020269	mspo	2R	14671396	14713622	-	3131	137.373	43.875	460.777	147.166	1.74329	0.139499	7.77661e-36	2.03695e-34	629.021	200.901	2.18916	0.139043	7.50052e-56	5.86576e-54
FBgn0265645	lncRNA:CR44452	2R	10656695	10657545	-	721	0	0	1.4658	2.03301	2.75779	2.01888	0.171939	0.268009	1.00942	1.40002	2.18614	2.09487	0.296685	0.427737
FBgn0035273	CG12020	3L	1797305	1798610	+	1242	0	0	1.0841	0.872863	2.2861	2.00922	0.255204	0.368519	1.00942	0.812734	2.18595	2.05036	0.286364	0.415754
FBgn0038665	euc	3R	18978273	18978809	-	477	0	0	2.88498	6.04818	3.74027	1.77034	0.0346229	0.0682585	1.00942	2.11618	2.1852	1.90646	0.251708	0.375483
FBgn0030331	CG15221	X	11724246	11736617	+	2494	0.491696	0.197152	0	0	-1.52467	2.28633	0.50486	0.622304	1.93818	0.777135	2.18051	2.04885	0.287209	0.416736
FBgn0262139	trh	3L	366524	392633	-	5502	0	0	1.91473	0.348007	3.10413	1.85997	0.0951347	0.163348	0.994443	0.180742	2.17285	1.96459	0.268724	0.39552
FBgn0063391	snoRNA:U14:30Eb	2L	9893946	9894026	-	81	0	0	1.26729	15.6455	2.54029	2.32853	0.275298	0.391856	0.994443	12.2771	2.17107	2.38317	0.362296	0.497349
FBgn0036040	CG6749	3L	9731238	9733807	-	1834	0.85022	0.463588	0.253458	0.138199	-1.47822	1.89505	0.435366	0.557469	3.61747	1.97245	2.15967	1.54797	0.162966	0.267667
FBgn0003372	Sgs1	2L	4937409	4941423	+	3950	0.491696	0.12448	0.222156	0.0562419	-0.562883	2.27357	0.804462	0.866534	1.88747	0.477839	2.15246	2.03632	0.290494	0.420398
FBgn0001085	fz	3L	14274343	14368639	+	3817	96.2678	25.2208	338.334	88.6387	1.8142	0.151473	4.68974e-33	1.10074e-31	426.075	111.626	2.15191	0.151298	6.59977e-46	3.64161e-44
FBgn0286880	CR46402	3R	23893518	23894162	+	524	0	0	0.919924	1.75558	2.11046	2.43167	0.385447	0.507356	0.97368	1.85817	2.15082	2.45503	0.380981	0.516081
FBgn0052311	zormin	3L	2117466	2151700	-	12085	40.2593	3.33135	37.1814	3.07666	-0.140273	0.248757	0.572825	0.68105	180.576	14.9422	2.13955	0.224869	1.82305e-21	3.25072e-20
FBgn0030841	CG8568	X	17448990	17452543	-	2647	1.93282	0.730194	5.36554	2.02703	1.43737	0.90729	0.113137	0.188741	8.67953	3.27901	2.13858	0.893057	0.0166352	0.0383698
FBgn0035501	CG1299	3L	4148696	4152473	+	1956	10.0648	5.14562	18.4195	9.4169	0.873913	0.461565	0.058309	0.107393	45.106	23.0603	2.13842	0.445301	1.56934e-06	7.49362e-06
FBgn0038892	CG15498	3R	21567519	21569149	-	1139	0	0	0.932206	0.818442	2.00761	2.29646	0.381999	0.503797	0.958706	0.841709	2.13686	2.31338	0.355644	0.490251
FBgn0035308	CG15822	3L	2153201	2163863	-	4713	12.5175	2.65595	34.3651	7.29156	1.44049	0.368998	9.46983e-05	0.00030389	55.627	11.8029	2.13489	0.36361	4.32199e-09	2.82408e-08
FBgn0052192	CG32192	3L	18040317	18041738	+	992	0	0	2.80336	2.82596	3.67622	1.80602	0.0417974	0.0804215	0.928759	0.936249	2.12222	1.94535	0.275308	0.403416
FBgn0035189	CG9119	3L	1203316	1204795	-	1212	0	0	0.951226	0.78484	2.15592	2.24239	0.336332	0.457521	0.943733	0.778657	2.12216	2.27507	0.350929	0.485436
FBgn0266429	AstA-R1	X	3574536	3666724	+	3704	0.724079	0.195486	0	0	-2.3627	1.92377	0.219386	0.326064	3.35281	0.905186	2.12082	1.58808	0.181725	0.291065
FBgn0082972	snoRNA:Psi28S-3316a	2R	21326739	21326870	+	132	0.724079	5.48545	2.15591	16.3326	1.53975	1.48688	0.300409	0.418196	3.37357	25.5574	2.11704	1.47197	0.150368	0.251044
FBgn0028494	CG6424	2R	17703335	17719346	-	6244	1.58133	0.253256	2.03532	0.325964	0.399919	1.11736	0.720408	0.802885	6.88769	1.10309	2.10495	1.03996	0.0429634	0.0880001
FBgn0041581	AttB	2R	14749223	14750165	+	879	3.6403	4.14141	9.02991	10.2729	1.36922	0.6919	0.0478239	0.0903502	15.445	17.5711	2.10316	0.680358	0.00199306	0.00576109
FBgn0050456	CG30456	2R	17100241	17107542	+	3165	52.4229	16.5633	122.451	38.6892	1.22147	0.187079	6.61214e-11	4.12518e-10	226.031	71.4156	2.10093	0.182958	1.60399e-30	4.57782e-29
FBgn0263239	dar1	3L	3626352	3653442	+	3526	0	0	0.932206	0.26438	2.01793	2.46638	0.413258	0.535433	0.928759	0.263403	2.1001	2.48661	0.398355	0.534441
FBgn0038607	hmw	3R	18361994	18364277	+	2041	0.724079	0.354767	4.5518	2.23018	2.48776	1.342	0.0637713	0.115858	3.33784	1.63539	2.0986	1.37111	0.12587	0.217833
FBgn0036007	path	3L	9494555	9505328	-	3195	607.908	190.268	2091.9	654.74	1.78364	0.0791062	1.42274e-112	2.1581e-110	2598.72	813.37	2.09835	0.0790727	3.63521e-155	2.12382e-152
FBgn0263457	asRNA:CR43480	X	23090324	23093609	+	2290	0.717048	0.313122	0	0	-2.3493	2.01397	0.243413	0.35421	3.23642	1.41328	2.09493	1.69795	0.217277	0.335035
FBgn0267101	lncRNA:CR45541	X	9584177	9584575	+	399	2.30541	5.77797	5.05317	12.6646	1.13584	0.864509	0.188894	0.290034	10.0584	25.2091	2.08927	0.841308	0.013015	0.0309172
FBgn0265937	asRNA:CR44724	2R	21297495	21298495	-	936	0.983392	1.05063	2.35904	2.52035	1.49499	1.40953	0.288861	0.406408	3.53103	3.77247	2.08818	1.39389	0.134109	0.229689
FBgn0040906	CG15579	X	4311279	4311799	-	521	1.58133	3.03518	5.07311	9.73726	1.67497	0.975958	0.0861203	0.150075	6.74135	12.9393	2.08218	0.971908	0.0321641	0.0683032
FBgn0050069	CG30069	2R	14185204	14198368	+	12808	527.204	41.1621	2261.4	176.561	2.09353	0.0879159	2.45586e-125	4.62202e-123	2240.57	174.935	2.08045	0.0882469	6.89995e-123	2.36312e-120
FBgn0039480	Cpr97Ea	3R	27083130	27087778	-	1781	8.11794	4.55808	46.6482	26.1922	2.49203	0.420156	3.0075e-09	1.63363e-08	34.7495	19.5112	2.07915	0.429252	1.2747e-06	6.14283e-06
FBgn0023170	RpL39	2R	24061853	24062431	-	288	76.501	265.628	240.594	835.395	1.65139	0.18451	3.55031e-19	4.02699e-18	322.175	1118.66	2.06536	0.183983	3.04425e-29	8.17175e-28
FBgn0085397	Fili	2R	21872030	21946259	+	5249	75.3798	14.3608	123.094	23.451	0.692974	0.168845	4.05724e-05	0.000137537	319.55	60.8782	2.06456	0.161584	2.20496e-37	8.75985e-36
FBgn0264745	CR44003	2L	3171035	3172799	-	1709	2.43155	1.42279	8.33306	4.87599	1.7936	0.799851	0.0249344	0.0512245	9.95701	5.82622	2.06137	0.800812	0.0100501	0.0246039
FBgn0004872	piwi	2L	10982205	10987420	-	3073	353.766	115.121	1745.75	568.093	2.29415	0.104891	4.82234e-106	6.6229e-104	1480.81	481.879	2.05637	0.105573	1.68112e-84	3.15035e-82
FBgn0083949	side-III	3R	5862865	5959555	-	8500	3.74654	0.440769	19.9903	2.35179	2.3338	0.618301	0.000160307	0.000496071	16.2613	1.91309	2.0459	0.629794	0.00116007	0.0035106
FBgn0286786	hoip	2L	9699791	9700459	+	607	68.2377	112.418	254.829	419.818	1.92095	0.163838	9.52684e-32	2.12794e-30	276.642	455.753	2.03991	0.164719	3.18317e-35	1.16661e-33
FBgn0033548	CG7637	2R	10810556	10810936	-	316	5.83243	18.4571	22.3818	70.8285	2.00559	0.531457	0.000160809	0.0004972	23.0852	73.0545	2.03668	0.53622	0.000145743	0.000521628
FBgn0264699	CG43968	3L	23784231	23787405	+	3103	5.50203	1.77313	24.8366	8.00406	2.23437	0.531349	2.60973e-05	9.08002e-05	21.3402	6.87729	2.02839	0.540315	0.000173974	0.000610355
FBgn0051928	CG31928	2L	1492295	1493859	+	1565	4.37844	2.79772	21.9292	14.0123	2.33747	0.56638	3.67486e-05	0.000125202	17.8242	11.3892	2.02471	0.578202	0.00046223	0.00151015
FBgn0266098	rg	X	5085759	5254864	+	20508	0.358524	0.0174822	0	0	-1.52467	2.35451	0.517275	0.632924	1.75996	0.085818	2.01291	2.13501	0.345778	0.480048
FBgn0267173	lncRNA:CR45613	X	18256609	18258007	-	1399	0.365555	0.261298	0.666467	0.476388	0.737791	2.14851	0.731301	0.812263	1.74498	1.24731	2.00143	2.05723	0.330614	0.464778
FBgn0030542	CG12481	X	14187253	14187841	+	589	0.85022	1.4435	0.963508	1.63584	0.0999543	1.65955	0.951973	0.968361	3.20647	5.44392	1.99981	1.5236	0.189333	0.300632
FBgn0011824	CG4038	2R	21095958	21097305	-	957	273.811	286.114	885.313	925.092	1.70367	0.126991	4.89756e-41	1.5315e-39	1079.3	1127.79	1.98702	0.126996	3.5209e-55	2.71082e-53
FBgn0267277	asRNA:CR45713	2L	21232745	21234035	+	1291	4.12616	3.19609	13.6207	10.5505	1.6611	0.627246	0.00809107	0.0186166	17.1282	13.2674	1.98077	0.626756	0.00157576	0.00465519
FBgn0082971	snoRNA:Psi28S-3316b	2R	21326882	21327022	+	141	0.983392	6.97441	2.69505	19.1138	1.61004	1.41736	0.255979	0.369586	3.28713	23.3129	1.96944	1.41416	0.163723	0.268687
FBgn0062517	CG16984	3L	2595781	2596998	+	1162	0.491696	0.423146	1.27495	1.0972	1.58984	1.76378	0.367386	0.489158	1.69427	1.45807	1.96697	1.75743	0.263041	0.389245
FBgn0085471	CG34442	2R	14366798	14367874	+	831	0.365555	0.439898	0.222156	0.267335	-0.562882	2.33776	0.809726	0.870084	1.6793	2.02082	1.9601	2.12005	0.355198	0.489908
FBgn0033960	CG10151	2R	14753337	14756288	-	2508	12.6014	5.02449	49.7057	19.8189	1.97295	0.348557	1.51088e-08	7.75506e-08	49.2098	19.6211	1.95977	0.352471	2.69667e-08	1.61054e-07
FBgn0264481	asRNA:CR43889	3L	19909365	19910203	+	785	2.43858	3.10647	6.58924	8.39394	1.48759	0.844493	0.0781501	0.137985	9.28712	11.8307	1.9583	0.838894	0.0195756	0.0444603
FBgn0037870	CG18577	3R	11196092	11197285	+	810	0.491696	0.607032	0.830638	1.02548	0.921119	1.96692	0.639566	0.737136	1.67351	2.06606	1.95772	1.89538	0.301655	0.433454
FBgn0262022	CG42833	3L	20200093	20200487	+	395	0.724079	1.83311	3.53243	8.94285	2.2085	1.34689	0.101066	0.171791	3.02825	7.66645	1.95267	1.37397	0.155261	0.257523
FBgn0265845	lncRNA:CR44634	2R	20136959	20137162	-	204	7.97774	39.1066	43.604	213.745	2.41556	0.425695	1.39187e-08	7.1696e-08	32.0367	157.042	1.95183	0.436066	7.60571e-06	3.32922e-05
FBgn0031086	fd19B	X	20091428	20092408	-	981	0.358524	0.365468	0	0	-1.52467	2.37159	0.520296	0.635293	1.65854	1.69066	1.94747	2.15815	0.366856	0.501599
FBgn0030543	CG11585	X	14189516	14190755	+	1165	0.731111	0.627563	0.222156	0.190691	-1.40378	1.95476	0.472673	0.592022	2.96257	2.54297	1.94633	1.63357	0.233476	0.355057
FBgn0015600	toc	2L	3068345	3144786	-	11265	92.1815	8.183	19.665	1.74567	-2.24868	0.231819	3.01046e-22	4.1457e-21	355.546	31.562	1.94283	0.164383	3.11621e-32	9.76348e-31
FBgn0025882	snoRNA:MeU6-A47	X	21386845	21386935	-	91	0.491696	5.40325	0.919924	10.1091	1.1902	1.8847	0.52771	0.641137	1.64356	18.0611	1.94008	1.8435	0.292621	0.422987
FBgn0031826	CG9550	2L	6497053	6498466	+	1298	0.491696	0.378811	0.608483	0.468785	0.395899	2.02698	0.845147	0.895457	1.64356	1.26623	1.93963	1.88063	0.302366	0.434225
FBgn0004168	5-HT1A	2R	19067155	19121958	+	5019	1.44816	0.288535	7.38091	1.47059	2.26808	0.965611	0.0188312	0.0399878	5.9401	1.18352	1.93885	0.986671	0.0494097	0.0993797
FBgn0085385	bma	3L	9908120	9967298	+	6061	0.358524	0.0591526	0.355025	0.0585753	-0.562884	2.21351	0.799268	0.862676	1.64356	0.27117	1.93855	1.98375	0.328463	0.462671
FBgn0250904	CG34434	X	5614554	5616370	-	1691	0.491696	0.290772	0	0	-1.52467	2.31982	0.51103	0.627625	1.64356	0.971947	1.93757	2.10182	0.356605	0.491166
FBgn0036945	Ssk	3L	20188522	20189779	+	898	13.8242	15.3945	68.3721	76.1382	2.2992	0.325949	1.74024e-12	1.24374e-11	53.1122	59.145	1.9331	0.333301	6.63662e-09	4.24983e-08
FBgn0267599	lncRNA:CR45937	3L	18234246	18234760	-	515	0.358524	0.696163	1.33755	2.59719	1.63529	1.78782	0.360358	0.482074	1.62859	3.16231	1.93242	1.78806	0.279814	0.408333
FBgn0038237	Pde6	3R	14513901	14558304	-	6535	62.6326	9.58417	161.181	24.6643	1.35908	0.17928	3.43487e-14	2.81068e-13	237.37	36.3229	1.92636	0.177581	2.0426e-27	4.99682e-26
FBgn0034540	Lrt	2R	20646360	20661070	+	3660	0.358524	0.0979574	4.25476	1.1625	3.27949	1.53775	0.0329525	0.0652693	1.59285	0.435206	1.92274	1.62957	0.238039	0.360012
FBgn0022770	Peritrophin-A	X	20244647	20248203	+	1516	13.5196	8.91792	19.8764	13.1111	0.601268	0.411883	0.144344	0.231675	49.2383	32.4791	1.91926	0.393869	1.10012e-06	5.33774e-06
FBgn0065046	snoRNA:U3:9B	X	10348170	10348337	+	168	0.717048	4.26814	2.23846	13.3241	1.5109	1.52621	0.322192	0.441894	2.86115	17.0306	1.91679	1.52011	0.207327	0.322805
FBgn0052816	CG32816	X	316576	470726	-	2406	4.36437	1.81395	5.00285	2.07932	0.207639	0.68808	0.76283	0.835632	16.3946	6.81403	1.9086	0.635882	0.00268655	0.00754603
FBgn0266756	btsz	3R	14804092	14875488	-	17286	8.03279	0.464699	12.752	0.737706	0.64984	0.507336	0.200233	0.303817	29.9613	1.73327	1.90759	0.485307	8.46996e-05	0.000316373
FBgn0267256	lncRNA:CR45692	2L	10657627	10658031	+	405	0.491696	1.21406	1.21697	3.00485	1.43149	1.92064	0.456077	0.57579	1.57788	3.896	1.90069	1.90641	0.318765	0.452283
FBgn0082949	snoRNA:Me18S-U1356a	3L	20454007	20454085	+	79	0.365555	4.62728	0.729071	9.22874	0.823683	2.0465	0.687328	0.776577	1.57788	19.9732	1.89841	1.96989	0.335188	0.469415
FBgn0085190	CG34161	2L	10580957	10581702	-	577	0.365555	0.633545	0.888622	1.54007	1.13582	2.10478	0.589446	0.694797	1.57788	2.73463	1.8955	2.06537	0.358748	0.493638
FBgn0029966	Ir7c	X	7874394	7876847	+	2358	0.491696	0.208523	0.355025	0.150562	-0.562883	2.29684	0.806403	0.867613	1.57788	0.66916	1.89512	2.07945	0.362108	0.49716
FBgn0053221	CR33221	X	3797497	3799028	-	1532	0.85022	0.554974	1.82545	1.19155	1.09447	1.51457	0.469911	0.589812	3.01328	1.96689	1.89439	1.48268	0.201363	0.315198
FBgn0053919	CG33919	2R	6623832	6624577	-	576	7.87853	13.678	14.3476	24.9091	0.823005	0.503218	0.101948	0.173022	29.1436	50.5966	1.88393	0.486535	0.00010788	0.0003945
FBgn0010651	MFS14	2R	18796975	18803727	-	3288	266.604	81.0839	768.291	233.665	1.52687	0.11043	1.76309e-43	6.17955e-42	980.035	298.064	1.88011	0.110282	3.60884e-65	3.98255e-63
FBgn0053177	CG33177	X	15081367	15082369	+	862	6.05075	7.01943	22.8203	26.4737	1.92362	0.523809	0.000240305	0.000722977	21.8488	25.3466	1.87513	0.530232	0.000405565	0.0013409
FBgn0033578	BBS4	2R	11135923	11139315	+	1520	1.21578	0.799852	2.72635	1.79365	1.10246	1.21527	0.364317	0.486347	4.36222	2.86988	1.86317	1.19042	0.117549	0.206162
FBgn0051792	CG31792	2L	18997448	19002713	+	4390	0.724079	0.164938	0.222156	0.0506049	-1.39734	1.96589	0.477212	0.595885	2.82008	0.642388	1.85492	1.65187	0.261471	0.387371
FBgn0005775	Con	3L	4936758	5079033	-	5947	35.9066	6.03777	72.7932	12.2403	1.0148	0.228415	8.881e-06	3.29889e-05	129.105	21.7093	1.83994	0.223185	1.66516e-16	2.09347e-15
FBgn0285992	hpRNA:CR46342	X	4921677	4928133	-	6457	2.68503	0.415832	9.65714	1.49561	1.76971	0.874396	0.0429783	0.0823818	9.73001	1.50689	1.83736	0.880258	0.036861	0.0769933
FBgn0032100	CG13108	2L	9164235	9165426	+	1021	1.34895	1.3212	6.68407	6.54659	2.42675	1.08365	0.0251284	0.0515919	4.3772	4.28717	1.83336	1.11707	0.10075	0.181903
FBgn0266376	lncRNA:CR45018	X	13304005	13308004	+	4000	44.1847	11.0462	107.479	26.8698	1.27613	0.218647	5.33044e-09	2.83927e-08	156.541	39.1353	1.82289	0.216701	4.03027e-17	5.29479e-16
FBgn0266977	CG45428	3L	22836555	22837070	-	516	16.3518	31.6896	81.7556	158.441	2.38674	0.32222	1.29024e-13	1.01022e-12	55.388	107.341	1.82144	0.330847	3.68355e-08	2.16993e-07
FBgn0015316	Try29F	2L	8998537	8999816	+	1280	3.28177	2.56388	7.9894	6.24172	1.33945	0.740434	0.0704493	0.126208	11.2557	8.79352	1.80161	0.735415	0.014294	0.0335861
FBgn0038156	side-IV	3R	13450590	13464184	+	5123	24.576	4.79719	316.644	61.8083	3.70809	0.237573	6.39795e-55	3.21893e-53	84.4413	16.4828	1.79863	0.250797	7.40898e-13	6.929e-12
FBgn0010473	tutl	2L	4283148	4323781	+	9888	797.455	80.6487	2822.89	285.486	1.8228	0.0749534	1.23087e-130	2.66156e-128	2766.3	279.763	1.79328	0.0752835	2.05485e-125	7.5588e-123
FBgn0010549	l(2)03659	2R	9390165	9395281	+	4499	3.52119	0.78266	2.35442	0.523322	-0.492802	0.900925	0.584382	0.690689	12.2255	2.71739	1.78735	0.803411	0.0261011	0.0570378
FBgn0030296	CG15196	X	11409947	11411667	+	1587	0.724079	0.456257	1.0841	0.68311	0.474624	1.59748	0.766384	0.838125	2.66795	1.68113	1.78674	1.51294	0.237614	0.35959
FBgn0053178	CG33178	X	15082827	15084017	+	861	1.44113	1.67378	6.34806	7.3729	2.0327	0.984299	0.0389108	0.0755543	5.37164	6.23884	1.78619	1.00486	0.0754772	0.142734
FBgn0264272	mwh	3L	1200786	1232700	+	4747	12.3108	2.59339	28.3178	5.9654	1.26613	0.406636	0.00184782	0.00481523	40.72	8.57806	1.78405	0.403143	9.62821e-06	4.15591e-05
FBgn0266217	lncRNA:CR44912	2L	2427050	2427881	-	832	1.96678	2.36392	0	0	-3.55565	1.65963	0.0321587	0.0638961	6.0565	7.27944	1.78001	1.21756	0.143755	0.242489
FBgn0051184	LSm3	3R	23996262	23997017	+	643	41.2582	64.1652	132.389	205.892	1.71154	0.208583	2.29552e-16	2.15414e-15	138.915	216.041	1.77882	0.210349	2.75504e-17	3.67289e-16
FBgn0033963	CG12857	2R	14757907	14759602	-	1584	0.724079	0.457121	2.0476	1.29268	1.34923	1.50486	0.369943	0.491522	2.61724	1.6523	1.76858	1.49729	0.237528	0.359513
FBgn0034606	ASPP	2R	21217856	21251150	-	5044	31.2669	6.19883	9.25206	1.83427	-1.67793	0.353715	2.09816e-06	8.49886e-06	105.9	20.9953	1.76849	0.272245	8.25197e-11	6.42812e-10
FBgn0004197	Ser	3R	27172090	27194267	-	5831	20.9986	3.6012	132.742	22.7649	2.68134	0.260342	7.09644e-25	1.13577e-23	70.3718	12.0686	1.76603	0.270921	7.09696e-11	5.57209e-10
FBgn0053493	CG33493	3L	10692530	10693167	-	638	1.58133	2.47857	4.91356	7.70151	1.61935	1.03253	0.116802	0.193837	5.41656	8.48991	1.7652	1.0388	0.0892695	0.164311
FBgn0037664	CG8420	3R	9246649	9251431	+	2330	0.731111	0.313781	0.222156	0.0953457	-1.4	2.00746	0.485553	0.604073	2.5873	1.11043	1.76154	1.70593	0.301792	0.433556
FBgn0051231	CG31231	3R	18665361	18667733	+	2241	0.731111	0.326243	1.55971	0.695988	1.02503	1.55448	0.509639	0.626674	2.60227	1.16121	1.76004	1.52431	0.248235	0.371641
FBgn0035398	Cht7	3L	3090985	3106958	-	3953	1.20874	0.305779	1.69258	0.428176	0.461421	1.32319	0.727301	0.808882	4.06761	1.02899	1.7597	1.25711	0.161572	0.265728
FBgn0023441	fus	2R	15657318	15676669	-	7287	143.855	19.7414	623.353	85.5432	2.10028	0.126659	9.38552e-62	5.4819e-60	490.529	67.3156	1.75751	0.128638	1.70081e-42	8.4042e-41
FBgn0038980	Octbeta1R	3R	22497215	22520078	+	5405	0.85022	0.157303	0	0	-2.44525	1.97092	0.214729	0.320046	2.76937	0.512372	1.75018	1.65884	0.291396	0.421458
FBgn0032530	CG9263	2L	13541638	13542576	-	751	1.44816	1.92831	4.65549	6.19905	1.60253	1.07402	0.135674	0.220026	5.10891	6.80281	1.74767	1.08026	0.105701	0.189158
FBgn0266182	lncRNA:CR44888	X	15497523	15497862	-	340	0.983392	2.89233	2.02858	5.96642	1.1193	1.68875	0.507459	0.624522	2.89109	8.50321	1.73869	1.6708	0.298044	0.428948
FBgn0014863	Mlp84B	3R	7112850	7117732	-	3136	4.60379	1.46805	10.4614	3.3359	1.17795	0.635283	0.0637097	0.115787	15.7247	5.01425	1.73745	0.628361	0.00569133	0.0148013
FBgn0086604	side-VIII	2R	20424338	20478951	+	5508	61.411	11.1494	191.775	34.8176	1.64338	0.178607	3.54241e-20	4.31156e-19	203.787	36.9984	1.72531	0.179922	8.87471e-22	1.60553e-20
FBgn0267201	lncRNA:CR45641	3R	16214278	16214957	+	680	5.20053	7.64784	18.4136	27.0789	1.82517	0.576401	0.00154292	0.00407822	17.0678	25.0998	1.72276	0.584904	0.00322568	0.00886729
FBgn0034657	LBR	2R	21720495	21724055	+	2915	429.364	147.295	1542.48	529.151	1.8367	0.103881	5.88905e-70	4.04395e-68	1420.96	487.466	1.71948	0.104456	6.96854e-61	6.52939e-59
FBgn0038365	CG9593	3R	15802275	15803653	+	1270	0.724079	0.570141	0.253458	0.199573	-1.38786	2.09183	0.507032	0.624247	2.56121	2.0167	1.71639	1.80747	0.34231	0.476266
FBgn0262565	CR43105	2R	15374846	15375702	-	802	0.358524	0.447038	0.253458	0.316032	-0.562882	2.41033	0.81535	0.874014	1.4354	1.78977	1.71014	2.21767	0.440621	0.575974
FBgn0085427	CG34398	2L	8898786	8933594	+	8746	35.4481	4.05306	39.6174	4.52978	0.178253	0.281047	0.52592	0.639758	114.905	13.1381	1.70867	0.266134	1.35976e-10	1.0325e-09
FBgn0085345	CG34316	3R	15230585	15231686	+	907	1.58133	1.74347	3.03013	3.34083	0.915925	1.11692	0.412192	0.534666	5.24413	5.78184	1.70334	1.09245	0.118952	0.207962
FBgn0017590	klg	3R	22899284	22961731	+	4052	3.38801	0.836134	8.86666	2.18822	1.34316	0.710245	0.0586083	0.107827	11.5296	2.8454	1.70331	0.708422	0.0162003	0.0375011
FBgn0029962	CARPA	X	7826197	7842679	+	3875	18.6771	4.81991	39.3707	10.1602	1.14626	0.352577	0.00114962	0.00310402	58.3129	15.0485	1.70314	0.349208	1.07624e-06	5.23211e-06
FBgn0053773	CG33773	3R	31035346	31036124	+	605	1.0826	1.78943	1.81317	2.99697	0.676018	1.40065	0.629347	0.728148	3.773	6.23636	1.70248	1.3565	0.209462	0.325363
FBgn0030270	CG15199	X	11140474	11141835	-	664	0	0	1.18566	1.78564	2.38331	2.24741	0.288932	0.406424	0.75054	1.13033	1.69888	2.35139	0.469987	0.603165
FBgn0267030	lncRNA:CR45474	X	620282	620729	+	448	1.0826	2.41653	2.49191	5.56231	1.07657	1.2464	0.387727	0.509763	3.77879	8.4348	1.68725	1.22845	0.169602	0.275919
FBgn0262608	CG43134	X	4247313	4247785	+	407	0.717048	1.76179	1.31853	3.23964	0.66735	1.74235	0.701707	0.789313	2.5105	6.16829	1.68712	1.68894	0.317831	0.45115
FBgn0033307	CG14752	2R	8590497	8591948	+	540	7.16148	13.262	14.8889	27.572	1.03577	0.511841	0.0430102	0.0824274	23.0384	42.6636	1.68096	0.503792	0.000848052	0.00263307
FBgn0037107	CG7166	3L	21620000	21625647	-	3466	1.34895	0.389194	5.84577	1.6866	2.23121	1.11702	0.045774	0.0869535	3.85559	1.1124	1.67544	1.15194	0.145823	0.245145
FBgn0025573	PpN58A	2R	21881352	21882533	-	1182	1.58836	1.34379	2.5812	2.18376	0.721461	1.1184	0.518872	0.634343	5.09779	4.31285	1.67337	1.08293	0.122293	0.21268
FBgn0265671	lncRNA:CR44478	2L	18145098	18145499	+	402	1.94689	4.843	4.11423	10.2344	1.04799	1.0363	0.311882	0.430309	6.3907	15.8973	1.66946	1.02275	0.102611	0.184526
FBgn0286204	ich	3R	8950246	8963037	-	4569	0.358524	0.0784688	0.577181	0.126325	0.35654	2.10481	0.865487	0.910964	1.38469	0.303061	1.66668	1.97928	0.399753	0.535737
FBgn0028857	CG12448	2L	15941441	15942854	+	1293	2.55769	1.97811	14.4267	11.1576	2.59313	0.757966	0.000623514	0.00176364	7.64935	5.91597	1.66616	0.791501	0.0352854	0.074092
FBgn0082937	snoRNA:Me28S-C2645b	2L	20648051	20648125	+	75	0.491696	6.55595	0.577181	7.69574	0.355212	2.08358	0.864631	0.910407	1.38469	18.4625	1.66616	1.95661	0.394462	0.530363
FBgn0037127	CG14566	3L	21739479	21740309	-	710	0.358524	0.504964	2.0163	2.83986	2.18729	1.69545	0.197019	0.300466	1.38469	1.95026	1.66028	1.75994	0.345492	0.479853
FBgn0041004	CG17715	2L	22844220	22854541	+	6035	5.72858	0.949226	1.9537	0.323728	-1.5745	1.75954	0.370874	0.492448	18.1024	2.99956	1.65638	1.68481	0.325545	0.459669
FBgn0020445	E23	2L	3334875	3354829	-	5149	132.943	25.8192	504.705	98.02	1.92022	0.11941	3.47473e-58	1.84888e-56	419.999	81.5691	1.65626	0.121621	3.118e-42	1.5033e-40
FBgn0264443	CG43861	2L	19968684	20017282	-	3707	1.09667	0.295836	0.355025	0.0957715	-1.98205	1.80734	0.272787	0.389318	3.61169	0.974288	1.6549	1.4393	0.250228	0.373724
FBgn0035370	Non2	3L	2766999	2768392	+	1320	1797.84	1362	6104.22	4624.41	1.76527	0.0897764	4.47894e-86	4.25415e-84	5615.23	4253.96	1.64475	0.0899455	1.06826e-74	1.53767e-72
FBgn0053539	tRNA:Trp-CCA-2-5	2R	21181284	21181355	+	72	0.365555	5.07716	0.222156	3.08549	-0.562882	2.43241	0.816997	0.874751	1.34895	18.7354	1.64383	2.24684	0.4644	0.598006
FBgn0030536	CG11068	X	13955236	13956574	+	1270	0.358524	0.282302	0.577181	0.454473	0.362187	2.20244	0.869378	0.913295	1.34895	1.06217	1.64327	2.08535	0.430693	0.566651
FBgn0267254	CG45690	2L	10658281	10658559	+	279	0.358524	1.28503	2.0163	7.22689	2.19122	1.7539	0.211538	0.316436	1.34895	4.83495	1.64174	1.81828	0.366576	0.501492
FBgn0035581	Dnah3	3L	4861269	4895749	+	14155	67.7875	4.78894	225.474	15.9289	1.73048	0.188472	4.24585e-20	5.14309e-19	212.937	15.0432	1.63916	0.190489	7.63099e-18	1.05995e-16
FBgn0267066	lncRNA:CR45510	X	21480757	21481124	-	368	0.358524	0.97425	1.18566	3.22191	1.39655	1.85001	0.450316	0.571071	1.33398	3.62494	1.63196	1.85624	0.379304	0.514511
FBgn0283426	lncRNA:acal	2R	10544925	10547260	-	2336	0.365555	0.156488	1.82083	0.779464	2.08512	1.79916	0.246479	0.358058	1.33398	0.571051	1.63196	1.857	0.379501	0.514567
FBgn0040682	CG14664	3R	5224139	5225542	+	1404	0.358524	0.255359	0.475613	0.338756	0.243397	2.13282	0.909143	0.941689	1.33398	0.950125	1.63172	1.99531	0.413486	0.548883
FBgn0038708	Scsalpha2	3R	19461879	19463066	-	1188	0.491696	0.413886	0.444311	0.373999	0.196039	2.19099	0.928704	0.953858	1.33398	1.12288	1.63163	2.05135	0.426384	0.562024
FBgn0034007	ND-51L2	2R	15296764	15298329	-	1566	0.365555	0.233432	0.355025	0.226708	-0.562884	2.28385	0.805324	0.86682	1.33398	0.851837	1.63158	2.08612	0.434148	0.569913
FBgn0052055	CG32055	3L	10218504	10220164	-	1605	0.358524	0.22338	0.222156	0.138415	-0.562884	2.31517	0.807906	0.868679	1.33398	0.831138	1.63154	2.12038	0.441623	0.57678
FBgn0265661	lncRNA:CR44468	2R	18805595	18807195	+	1601	0	0	1.30625	0.815897	2.57021	2.06721	0.213749	0.318992	0.69983	0.43712	1.63153	2.20408	0.459159	0.593464
FBgn0028902	Tektin-A	2L	15854126	15856450	+	2169	0.491696	0.226693	0	0	-1.52467	2.41638	0.528059	0.641467	1.33398	0.615019	1.6314	2.23048	0.464527	0.598092
FBgn0263078	CG43339	2L	18671604	18673285	-	1469	4.98924	3.39635	3.72328	2.53457	-0.317491	0.722992	0.660564	0.754474	14.9592	10.1832	1.63005	0.651516	0.0123518	0.029497
FBgn0052641	CG32641	X	13184478	13184996	+	466	1.70044	3.64901	2.08657	4.47761	0.275368	1.20468	0.819194	0.876457	5.03211	10.7985	1.62624	1.14164	0.15431	0.256289
FBgn0031735	CG11029	2L	5746157	5747961	+	1805	1.22281	0.677455	6.11151	3.38588	2.31223	1.11999	0.0389686	0.0756519	3.7131	2.05712	1.62468	1.16087	0.161652	0.265771
FBgn0082997	snoRNA:Psi28S-1232	X	6743675	6743815	-	141	0.365555	2.59259	1.18566	8.40896	1.39652	1.84972	0.450254	0.571064	1.319	9.35463	1.6219	1.85693	0.382428	0.517476
FBgn0266699	asRNA:CR45189	3R	30781178	30783645	-	929	0.491696	0.529275	1.36886	1.47347	1.65986	1.87158	0.375145	0.496598	1.319	1.41981	1.62143	1.90056	0.393585	0.529471
FBgn0034329	BomS1	2R	18383949	18384378	+	361	0.491696	1.36204	0.799336	2.21423	0.88578	1.98248	0.655016	0.750076	1.319	3.65375	1.62109	1.93553	0.402288	0.538045
FBgn0028408	Drep2	2R	9291856	9302821	+	6902	3.51415	0.50915	20.5294	2.97441	2.50289	0.655134	0.000133222	0.000418397	10.8766	1.57586	1.62089	0.681711	0.017422	0.0400082
FBgn0033558	CG12344	2R	10827430	10835709	-	2905	0.365555	0.125837	0.608483	0.20946	0.404015	2.10088	0.847501	0.897204	1.319	0.454046	1.62062	1.98754	0.414849	0.55003
FBgn0266218	lncRNA:CR44913	2L	6619080	6619446	+	367	0.365555	0.996063	0.608483	1.65799	0.404015	2.10088	0.847501	0.897204	1.319	3.59401	1.62062	1.98754	0.414849	0.55003
FBgn0051287	CG31287	3R	16203371	16204961	+	1425	0.491696	0.34505	0.222156	0.155899	-0.562884	2.28581	0.805488	0.866904	1.319	0.925616	1.61984	2.08929	0.438158	0.573585
FBgn0024245	dnt	2L	19338669	19363227	-	2639	106.601	40.3943	407.281	154.331	1.91029	0.147821	3.33883e-38	9.47837e-37	331.689	125.688	1.61778	0.15017	4.61618e-27	1.10477e-25
FBgn0037485	CG14606	3R	7214339	7217083	-	1925	0	0	1.42684	0.741215	2.73047	2.14271	0.202555	0.306016	0.684856	0.35577	1.61442	2.2876	0.48036	0.612048
FBgn0052082	IRSp53	3L	11136049	11163984	+	5246	34.2401	6.5269	39.9642	7.61802	0.230175	0.260071	0.376131	0.497478	104.131	19.8495	1.60531	0.245488	6.18284e-11	4.88139e-10
FBgn0031097	obst-A	X	20239855	20243209	+	1905	252.83	132.719	488.078	256.209	0.944728	0.125113	4.32009e-14	3.5096e-13	768.616	403.473	1.60528	0.124044	2.63319e-38	1.07184e-36
FBgn0263466	snoRNA:lola-a	2R	10536495	10536660	-	166	0.731111	4.40428	1.55971	9.39584	1.02598	1.57627	0.515115	0.63116	2.35837	14.207	1.60136	1.55646	0.303551	0.435738
FBgn0265701	lncRNA:CR44508	X	8707974	8708184	+	211	0.365555	1.73249	1.40782	6.67213	1.67824	1.85917	0.366696	0.488431	1.28327	6.08183	1.59933	1.89189	0.397911	0.534052
FBgn0001325	Kr	2R	25226611	25231394	+	4411	0.717048	0.162559	0.951226	0.215649	0.395664	1.72002	0.818065	0.87571	2.31345	0.524472	1.59868	1.64274	0.330466	0.46467
FBgn0265932	lncRNA:CR44721	3L	11323356	11323850	-	495	1.34895	2.72515	2.37133	4.79056	0.866708	1.26699	0.493931	0.612024	3.79376	7.66417	1.59664	1.2414	0.198386	0.311521
FBgn0086602	snoRNA:Psi28S-3436b	X	6742349	6742491	-	143	0.365555	2.55633	2.52322	17.6449	2.52946	1.67563	0.131157	0.213682	1.26829	8.86918	1.59504	1.76493	0.366131	0.501159
FBgn0052069	CG32069	3L	11062131	11062614	-	356	2.19917	6.17744	6.76107	18.9918	1.73382	0.928135	0.0617521	0.112835	6.27431	17.6245	1.59261	0.943936	0.0915655	0.16776
FBgn0266686	lncRNA:CR45176	3L	20439600	20439921	+	322	3.16266	9.82193	5.50976	17.1111	0.808564	0.794605	0.308884	0.427333	9.49189	29.4779	1.59223	0.776227	0.0402434	0.0831144
FBgn0086906	sls	3L	2039681	2115611	-	58996	11.9113	0.2019	9.93636	0.168424	-0.260604	0.464595	0.574848	0.682657	35.0311	0.593788	1.58918	0.421755	0.000164542	0.000581949
FBgn0051469	CG31469	3R	13709159	13709939	-	613	1.44113	2.35094	3.04915	4.97415	1.01994	1.1685	0.382739	0.504642	4.58536	7.4802	1.58758	1.1552	0.169352	0.275776
FBgn0039476	CG6271	3R	27024968	27026109	-	1072	1.44816	1.35089	2.39035	2.2298	0.63269	1.13892	0.578542	0.685537	4.6211	4.31073	1.58715	1.10076	0.149341	0.249874
FBgn0266753	lncRNA:CR45226	3R	26519580	26522279	+	2265	0.358524	0.158289	0.475613	0.209984	0.238415	2.21879	0.91443	0.944446	1.26829	0.559953	1.58217	2.09043	0.449131	0.583858
FBgn0004878	cas	3R	5712975	5716805	-	3151	48.9306	15.5286	217.335	68.9733	2.13536	0.194045	3.63819e-28	6.93713e-27	147.922	46.9443	1.58211	0.199367	2.09368e-15	2.40676e-14
FBgn0031294	IA-2	2L	1008378	1048053	-	10257	8.21012	0.800441	18.8589	1.83864	1.11698	0.486823	0.0217657	0.0454872	25.5262	2.48866	1.58082	0.483422	0.0010752	0.00327875
FBgn0082939	snoRNA:Me28S-C3227b	2R	14622330	14622409	+	80	0	0	3.23327	40.4158	3.84244	1.77863	0.0307467	0.0615357	0.64912	8.114	1.57914	2.00964	0.431994	0.567836
FBgn0051663	CG31663	2L	1858609	1881480	-	3847	0.358524	0.0931958	0.222156	0.0577477	-0.562882	2.42948	0.81678	0.87468	1.26829	0.329684	1.57827	2.24904	0.482835	0.613654
FBgn0015575	alpha-Est7	3R	7519563	7523753	-	2017	266.01	131.884	408.934	202.744	0.631624	0.108935	6.70456e-09	3.53599e-08	790.555	391.946	1.57776	0.106597	1.43831e-49	9.09894e-48
FBgn0029939	CG9650	X	7137723	7241932	+	8003	49.4274	6.17611	188.335	23.5331	1.931	0.194083	2.53807e-23	3.71142e-22	146.933	18.3597	1.57278	0.198492	2.30676e-15	2.64558e-14
FBgn0000504	dsx	3R	7924323	7967408	-	9053	53.0126	5.85581	162.13	17.9089	1.60254	0.196253	3.19722e-16	2.95932e-15	157.271	17.3722	1.56835	0.19854	2.80139e-15	3.1871e-14
FBgn0264504	asRNA:CR43903	3R	23694006	23694688	+	683	0.731111	1.07044	0.253458	0.371095	-1.3957	2.07265	0.500701	0.618753	2.24776	3.29101	1.56506	1.79337	0.382833	0.517883
FBgn0029079	icln	2R	17590964	17591881	+	832	89.3292	107.367	300.994	361.772	1.76459	0.1655	1.52957e-26	2.66638e-25	262.884	315.967	1.56496	0.167803	1.09756e-20	1.8445e-19
FBgn0086447	l(2)37Cg	2L	19133023	19135233	-	756	80.6662	106.701	225.359	298.095	1.48966	0.163144	6.79113e-20	8.14856e-19	236.449	312.763	1.55684	0.164458	2.89384e-21	5.10509e-20
FBgn0031065	CG14234	X	19735570	19740456	+	3638	0	0	1.40782	0.386976	2.64684	2.05499	0.197744	0.301376	0.634146	0.174312	1.55652	2.21001	0.481244	0.612549
FBgn0030886	CG12672	X	18005897	18007606	-	1710	0	0	1.82545	1.06751	3.0072	2.07471	0.14721	0.235308	0.634146	0.370846	1.55523	2.24875	0.48919	0.619645
FBgn0265578	CG44405	2L	16340392	16342324	-	1933	2.42452	1.25428	9.80811	5.07403	2.01245	0.81337	0.0133529	0.0293016	7.03597	3.63992	1.55494	0.837844	0.0634707	0.123461
FBgn0003046	Pcp	2L	7021682	7022470	+	718	0.358524	0.499337	0.86194	1.20047	0.967927	2.2164	0.662321	0.755717	1.23835	1.72472	1.55479	2.18858	0.477449	0.609737
FBgn0030058	CG11294	X	8691820	8693620	-	1291	0.358524	0.27771	0.253458	0.196327	-0.56288	2.60946	0.829216	0.883486	1.23835	0.959214	1.54763	2.44478	0.526711	0.652404
FBgn0036360	CG10713	3L	13428839	13435229	-	2534	0.358524	0.141485	0.253458	0.100023	-0.56288	2.60946	0.829216	0.883486	1.23835	0.488692	1.54763	2.44478	0.526711	0.652404
FBgn0004795	retn	2R	23632610	23654820	+	4477	2.42452	0.54155	6.29008	1.40498	1.37919	0.861572	0.109424	0.1836	6.95531	1.55356	1.54425	0.866723	0.0747968	0.141995
FBgn0052669	CG32669	X	10842697	10845081	-	2385	3.36692	1.41171	7.1161	2.98369	1.02744	0.769319	0.181707	0.280482	10.2255	4.28743	1.53678	0.762292	0.0438004	0.0895114
FBgn0011999	tRNA:Val-CAC-2-1	3R	7451297	7451369	+	73	0.857251	11.7432	0.963508	13.1987	0.100232	1.69738	0.952911	0.969025	2.37913	32.5908	1.53514	1.59103	0.334611	0.468943
FBgn0265205	lncRNA:CR44265	3R	21223623	21224589	-	846	0	0	1.59101	1.88063	2.85092	2.12667	0.180065	0.278581	0.619173	0.731883	1.53453	2.2922	0.503204	0.632876
FBgn0261588	pdm3	2R	8327490	8396280	+	5381	14.2109	2.64094	32.8183	6.09893	1.1972	0.363612	0.000992976	0.00271207	41.401	7.69393	1.53321	0.363023	2.40597e-05	9.70598e-05
FBgn0053276	Urm1	3L	7639811	7640446	-	391	27.518	70.3784	91.4499	233.887	1.7739	0.274944	1.10492e-10	6.78506e-10	77.4608	198.11	1.53295	0.279991	4.37497e-08	2.55601e-07
FBgn0010258	Rbp4	3R	13654556	13656394	-	1515	5.91878	3.90678	10.8394	7.1547	0.823307	0.5896	0.162599	0.256042	17.9763	11.8655	1.52881	0.578781	0.00825566	0.0206329
FBgn0064227	Rdh	3L	3825449	3828525	+	440	1.47509	3.35247	2.72635	6.19625	1.01096	1.27	0.426014	0.548048	3.72808	8.47291	1.52703	1.25795	0.224783	0.343945
FBgn0266825	lncRNA:CR45287	2L	5486905	5487191	+	287	0.85022	2.96244	1.05279	3.66827	0.385014	1.59698	0.809486	0.869917	2.32842	8.11296	1.52492	1.52206	0.316402	0.449636
FBgn0054002	CG34002	3L	17858474	17860482	+	1148	0.85022	0.74061	0.222156	0.193515	-1.48202	1.94906	0.447031	0.567896	2.32842	2.02824	1.51679	1.64652	0.356944	0.491428
FBgn0030941	wgn	X	18624042	18634908	-	2594	261.293	100.73	1075.38	414.563	2.03835	0.109392	1.72026e-77	1.43304e-75	745.004	287.203	1.50768	0.11123	7.44133e-42	3.5194e-40
FBgn0085192	CG34163	2L	11988270	11988801	+	478	22.2636	46.5765	74.7331	156.345	1.76521	0.277778	2.08779e-10	1.25626e-09	62.3114	130.359	1.50725	0.284133	1.12841e-07	6.25063e-07
FBgn0036155	CG6163	3L	11361986	11364885	-	2020	141.841	70.2181	455.131	225.312	1.68192	0.132777	8.9847e-37	2.41565e-35	402.385	199.2	1.50404	0.134577	5.3408e-29	1.41453e-27
FBgn0026196	nop5	2L	6916753	6918743	-	1813	1760.16	970.853	6078.67	3352.82	1.79026	0.0877162	1.37078e-92	1.43621e-90	4948.94	2729.7	1.49357	0.0879825	1.2407e-64	1.33942e-62
FBgn0052409	CG32409	3L	5899528	5900936	+	1231	289.887	235.489	864.827	702.54	1.57958	0.103741	2.36763e-52	1.07902e-50	812.893	660.351	1.48964	0.104694	6.10054e-46	3.38495e-44
FBgn0051259	CG31259	3R	8523944	8526667	+	2464	0.85022	0.345057	0.253458	0.102864	-1.48342	1.97031	0.451516	0.571808	2.26274	0.918318	1.48663	1.67342	0.374339	0.50896
FBgn0053117	Victoria	2L	19912938	19913516	-	522	22.6932	43.4735	49.6373	95.0906	1.12162	0.292906	0.000128519	0.000404878	63.4884	121.625	1.4845	0.292067	3.72028e-07	1.92447e-06
FBgn0002609	E(spl)m3-HLH	3R	26021823	26023127	+	1305	10.4163	7.98186	15.0607	11.5408	0.474293	0.466585	0.309382	0.427883	29.5696	22.6587	1.48183	0.450405	0.00100187	0.00307324
FBgn0032797	Hasp	2L	19508953	19517204	-	6466	1.20874	0.186939	1.33755	0.206859	0.161611	1.37657	0.906542	0.939738	3.33784	0.516213	1.48105	1.2971	0.253529	0.377689
FBgn0037910	CG14708	3R	11554145	11554869	+	725	1.81371	2.50167	1.14208	1.57528	-0.611613	1.24092	0.622104	0.7224	5.3359	7.35987	1.47883	1.10535	0.180932	0.290309
FBgn0010015	CanA1	3R	31039374	31046821	+	3064	12.6436	4.12651	45.6151	14.8874	1.84901	0.382445	1.33335e-06	5.5468e-06	34.9876	11.4189	1.47585	0.391907	0.000166011	0.000585968
FBgn0261989	CG42807	2R	13570595	13572759	-	2101	2.05896	0.979993	0.919924	0.437851	-0.989013	1.26516	0.434372	0.556497	5.56483	2.64866	1.47525	1.0825	0.172941	0.280295
FBgn0051406	CG31406	3R	10348761	10350010	+	1010	1.34192	1.32863	4.14091	4.09991	1.76636	1.16198	0.128479	0.21006	3.4692	3.43485	1.47225	1.1912	0.216481	0.334332
FBgn0085465	CG34436	3R	28282580	28283548	+	853	1.21578	1.42529	1.71926	2.01555	0.575031	1.32051	0.663228	0.756077	3.3021	3.87116	1.46876	1.2797	0.251076	0.374821
FBgn0010228	HmgZ	2R	21697488	21707861	-	1604	4319.13	2692.73	10545.5	6574.52	1.28763	0.0809088	5.02042e-57	2.60319e-55	11945	7447.02	1.46783	0.0809335	1.64988e-73	2.27592e-71
FBgn0029117	Surf1	3L	6958346	6959586	+	1055	28.2617	26.7883	65.9305	62.4934	1.19881	0.264993	6.07012e-06	2.30361e-05	79.727	75.5706	1.46664	0.265338	3.2495e-08	1.92681e-07
FBgn0040752	Prosap	2R	14060456	14140902	-	9022	171.216	18.9776	46.7467	5.18142	-1.89128	0.166562	7.01784e-30	1.46152e-28	476.048	52.7652	1.4647	0.13094	4.7732e-29	1.26758e-27
FBgn0267601	lncRNA:CR45939	3L	18772086	18801312	-	2803	1.70747	0.609159	5.48612	1.95723	1.76775	1.02248	0.0838305	0.146689	4.51435	1.61054	1.45437	1.04866	0.165476	0.270803
FBgn0284220	Top2	2L	19447365	19453490	-	5242	5863.4	1118.54	16720	3189.62	1.5119	0.059863	9.73905e-141	2.35662e-138	16041.8	3060.25	1.4522	0.0599399	1.13878e-129	4.52414e-127
FBgn0267318	lncRNA:CR45754	3L	16176810	16177256	+	447	16.6495	37.2471	47.5688	106.418	1.51502	0.32697	3.59506e-06	1.41123e-05	45.6261	102.072	1.45085	0.33213	1.25214e-05	5.29654e-05
FBgn0270928	VAChT	3R	18705501	18718916	+	7098	4.61082	0.649594	6.89394	0.971251	0.550997	0.692597	0.426292	0.548321	12.7525	1.79663	1.44836	0.672291	0.0312117	0.0665081
FBgn0036730	qjt	3L	17479096	17480141	+	990	2.29838	2.32159	2.20715	2.22945	-0.120748	1.05208	0.908627	0.941522	6.43756	6.50258	1.44754	0.977114	0.138488	0.235485
FBgn0031393	CG15382	2L	2155753	2156790	+	1038	5.21459	5.02369	14.2169	13.6964	1.46515	0.578787	0.0113601	0.0252873	14.1676	13.6489	1.44737	0.587154	0.0136988	0.0323328
FBgn0027596	Kank	2R	14901475	14928425	-	7416	8.25695	1.1134	5.88473	0.793518	-0.498606	0.596988	0.403603	0.525807	21.8488	2.94617	1.44206	0.538134	0.00736809	0.0186683
FBgn0003254	rib	2R	19270078	19281396	+	4665	1.56727	0.335963	2.52322	0.540882	0.643889	1.16916	0.581819	0.688602	4.26081	0.913356	1.44184	1.14031	0.206079	0.321302
FBgn0267200	lncRNA:CR45640	3R	16208673	16209054	+	382	2.066	5.40837	3.1004	8.11622	0.586371	1.02394	0.566874	0.676032	5.52377	14.4601	1.44033	0.994537	0.147551	0.24763
FBgn0261790	SmE	2L	7884930	7885450	-	521	140.902	270.446	394.632	757.452	1.49104	0.13548	3.5894e-28	6.85698e-27	380.934	731.16	1.43676	0.136917	9.23842e-26	2.06658e-24
FBgn0031940	CG7214	2L	7743682	7744839	-	1041	1.7145	1.64698	10.0827	9.68559	2.66447	0.945735	0.00484204	0.0116666	4.39796	4.22475	1.43542	0.999226	0.150852	0.251692
FBgn0003997	hid	3L	18167745	18185641	-	4018	40.5174	10.084	58.3242	14.5157	0.492907	0.248803	0.0475784	0.0899775	110.111	27.4044	1.4341	0.241572	2.91134e-09	1.93544e-08
FBgn0264511	lncRNA:CR43910	3L	8569335	8569864	+	530	1.34192	2.53192	1.81317	3.42107	0.570174	1.31312	0.664134	0.756459	3.3021	6.23037	1.41916	1.27581	0.265983	0.392591
FBgn0020513	Paics	X	12757036	12760617	-	2550	489.972	192.146	1315.8	516	1.42761	0.0790461	6.52064e-73	4.76758e-71	1303.02	510.99	1.41384	0.0796875	1.97569e-70	2.48387e-68
FBgn0069973	CG40485	X	22960609	22962360	-	1752	16.4171	9.37048	1.47042	0.839282	-3.60225	0.743993	1.28682e-06	5.3686e-06	43.3016	24.7155	1.41057	0.395112	0.000356909	0.00119234
FBgn0083050	snoRNA:Psi18S-1377b	3R	30207493	30207630	-	138	0.731111	5.2979	1.985	14.3841	1.31971	1.55337	0.395559	0.517559	2.08452	15.1052	1.40464	1.56838	0.370468	0.505216
FBgn0087040	alphaTub67C	3L	9681268	9683370	+	1617	1.34895	0.834228	2.00402	1.23934	0.723102	1.32739	0.585923	0.691877	3.26636	2.02001	1.40174	1.30332	0.282142	0.410794
FBgn0266396	lncRNA:CR45036	3L	11364683	11365897	+	1215	11.8926	9.78815	59.7785	49.2004	2.30063	0.366556	3.46638e-10	2.05057e-09	32.2955	26.5807	1.40107	0.38282	0.000252349	0.000865745
FBgn0053258	CG33258	3L	16082551	16083638	+	964	0.731111	0.758413	1.985	2.05913	1.32662	1.60739	0.409187	0.531786	2.05457	2.1313	1.39608	1.62289	0.389655	0.525323
FBgn0036652	CG13032	3L	16673964	16676264	+	2187	2.066	0.944671	1.4971	0.684547	-0.373152	1.14117	0.743675	0.821733	5.27601	2.41244	1.39601	1.03539	0.177564	0.285736
FBgn0086669	snoRNA:Psi18S-841a	2R	21327056	21327199	+	144	0.724079	5.02833	0.86194	5.9857	0.111317	1.75124	0.949317	0.967306	2.03381	14.1237	1.39554	1.65313	0.398566	0.534579
FBgn0032629	beat-IIIc	2L	17187637	17260734	-	3902	216.15	55.3948	215.13	55.1333	-0.00683113	0.130553	0.95827	0.973442	566.918	145.289	1.39533	0.125015	6.31143e-29	1.66273e-27
FBgn0039233	CG7006	3R	24850627	24851385	+	708	20.3026	28.676	52.2329	73.7752	1.38209	0.314765	1.12896e-05	4.13166e-05	52.7321	74.4803	1.38928	0.318592	1.29652e-05	5.46562e-05
FBgn0014135	bnl	3R	19794073	19836817	-	4559	1375.41	301.691	2336.02	512.398	0.761552	0.067254	1.00357e-29	2.08575e-28	3601.8	790.042	1.38767	0.0668706	1.18531e-95	2.67556e-93
FBgn0052643	CG32643	X	12984524	12985071	+	548	4.01991	7.33561	4.71809	8.60965	0.254843	0.750806	0.734289	0.814814	10.4395	19.0502	1.3845	0.715627	0.0530314	0.105608
FBgn0039282	Bili	3R	25131306	25136709	+	4328	0.717048	0.165677	1.28723	0.297419	0.644504	1.76106	0.714383	0.798184	1.9831	0.458201	1.38266	1.72541	0.422928	0.557912
FBgn0262604	lncRNA:CR43130	3R	8819618	8821098	+	293	1.08963	3.71889	4.21117	14.3726	1.85802	1.1779	0.114703	0.190884	3.04322	10.3864	1.37711	1.21799	0.258206	0.383334
FBgn0285879	disco-r	X	16118067	16148977	-	7442	193.861	26.0496	392.503	52.7416	1.00647	0.122594	2.21652e-16	2.08578e-15	507.281	68.1647	1.37637	0.122286	2.18127e-29	5.88706e-28
FBgn0265017	lncRNA:CR43751	2L	2181962	2185495	+	3405	2.17224	0.637955	3.38054	0.992815	0.563954	0.975203	0.563066	0.672437	5.97005	1.75332	1.37464	0.949671	0.14776	0.247855
FBgn0029800	lin-52	X	5753390	5754958	-	1360	72.7384	53.4841	109.718	80.6748	0.607748	0.182213	0.000851851	0.00234872	187.248	137.682	1.37335	0.178286	1.32838e-14	1.43408e-13
FBgn0267572	asRNA:CR45912	3L	18858690	18866107	-	7418	2.67097	0.360065	2.25074	0.303416	-0.432423	1.02338	0.672627	0.763874	7.11662	0.959372	1.37325	0.931568	0.140447	0.238244
FBgn0027660	blot	3L	17396031	17421514	-	4601	110.112	23.9321	395.645	85.991	1.83117	0.132732	2.69452e-43	9.31444e-42	286.727	62.3185	1.36988	0.136413	9.94669e-24	2.01203e-22
FBgn0029708	CG3556	X	4530231	4535464	+	4050	3.6403	0.898838	4.3554	1.07541	0.307333	0.810615	0.704587	0.79089	9.25718	2.28572	1.36964	0.77794	0.0783054	0.147325
FBgn0032484	kek4	2L	13212335	13215350	-	2703	19.1361	7.07957	27.6513	10.2299	0.548791	0.364061	0.131705	0.214437	48.5119	17.9474	1.36904	0.355412	0.000117165	0.00042657
FBgn0263083	CG43351	2R	19030009	19030250	+	242	0.724079	2.99206	2.66282	11.0034	1.83176	1.53493	0.232721	0.341537	1.9831	8.19461	1.36766	1.5809	0.386973	0.522416
FBgn0052791	DIP-alpha	X	3507245	3571649	-	8983	14.6686	1.63293	31.2257	3.47609	1.06557	0.360986	0.003159	0.00787077	38.6824	4.30618	1.36751	0.360959	0.000151535	0.000540798
FBgn0027581	CG6191	2R	13580313	13593339	-	3745	3.02246	0.807065	4.49593	1.20052	0.531428	0.849127	0.531412	0.644634	8.06615	2.15384	1.36666	0.82602	0.0980229	0.17782
FBgn0260653	serp	3L	19700977	19708015	-	2541	1.21578	0.478463	2.30106	0.905573	0.89579	1.29239	0.488229	0.606808	3.14464	1.23756	1.36633	1.28149	0.286333	0.415754
FBgn0031961	CG7102	2L	7883282	7887513	-	2264	4.94825	2.18562	9.49112	4.19219	0.908901	0.653939	0.164563	0.258564	13.1316	5.80017	1.36587	0.649222	0.0353912	0.0742983
FBgn0085412	kmr	3R	13715207	13764667	+	14179	93.6632	6.60577	192.399	13.5693	1.02977	0.153001	1.69089e-11	1.10868e-10	242.132	17.0768	1.36538	0.152751	3.94246e-19	5.92383e-18
FBgn0038678	mRpL55	3R	19094394	19094905	-	456	65.8901	144.496	166.451	365.023	1.35792	0.186784	3.59424e-13	2.71384e-12	166.999	366.225	1.36348	0.188803	5.1348e-13	4.8756e-12
FBgn0016726	RpL29	2R	21293768	21294404	+	389	210.887	542.126	464.565	1194.26	1.14625	0.1251	5.06311e-20	6.08952e-19	542.411	1394.37	1.36308	0.125357	1.54082e-27	3.80682e-26
FBgn0024944	Oamb	3R	20689018	20714577	-	5533	0.731111	0.132136	0	0	-2.35202	2.16439	0.277175	0.393797	1.95315	0.353	1.36261	1.91119	0.475867	0.608356
FBgn0020660	eIF4B	3L	27842669	27858271	-	1922	54.9154	28.572	145.938	75.9303	1.42147	0.192957	1.74812e-13	1.35516e-12	140.443	73.0714	1.36133	0.195759	3.5478e-12	3.14334e-11
FBgn0026176	SkpB	2R	12139295	12140229	-	877	5.32084	6.06709	9.72002	11.0833	0.869837	0.643154	0.17623	0.273438	14.0005	15.964	1.35771	0.637713	0.0332515	0.0702967
FBgn0063379	snoRNA:U31:54Ec	2R	17702172	17702238	+	67	1.20874	18.041	1.93375	28.862	0.756895	1.35448	0.576291	0.683652	3.09393	46.1781	1.3562	1.33501	0.30969	0.442567
FBgn0053552	CG33552	2L	16682503	16683290	+	788	2.90918	3.69186	5.99766	7.61124	1.07573	0.877568	0.220271	0.326997	7.32865	9.30031	1.35402	0.878305	0.123165	0.214047
FBgn0265153	lncRNA:CR44222	2L	223519	224708	+	1190	10.949	9.20085	26.8406	22.5551	1.30552	0.415617	0.0016828	0.00442262	27.3929	23.0192	1.35214	0.420481	0.00130122	0.00390681
FBgn0034231	APC10	2R	17517261	17518186	-	867	104.533	120.569	270.242	311.698	1.39419	0.157949	1.07646e-18	1.18143e-17	263.001	303.346	1.3517	0.159682	2.56255e-17	3.42086e-16
FBgn0032783	CG10237	2L	19435850	19442727	-	2769	1.93282	0.698022	5.86479	2.11802	1.57475	0.930178	0.0904631	0.15625	5.03211	1.8173	1.3502	0.952612	0.156377	0.25877
FBgn0032645	CG15142	2L	17497994	17498821	-	773	12.7135	16.447	15.4774	20.0225	0.272505	0.439327	0.535074	0.648269	32.2376	41.7045	1.34621	0.421624	0.00140844	0.00420078
FBgn0004362	HmgD	2R	21701458	21716727	+	1965	17025.6	8664.42	54989.5	27984.5	1.69127	0.0617182	2.51997e-165	8.83119e-163	43196.1	21982.7	1.34305	0.0617646	7.76482e-105	1.97744e-102
FBgn0035541	CG15019	3L	4405127	4406059	-	764	704.281	921.833	1859.5	2433.89	1.40685	0.0929254	8.87651e-52	3.95667e-50	1777.94	2327.15	1.34202	0.0933804	7.80921e-47	4.53574e-45
FBgn0265962	lncRNA:CR44749	2R	21708945	21709595	-	551	4.36437	7.92083	7.81387	14.1812	0.850882	0.718007	0.235994	0.345243	11.0644	20.0807	1.3399	0.711796	0.0597797	0.117222
FBgn0265102	Oseg1	3L	8407268	8412825	-	4766	25.9878	5.45275	95.0176	19.9365	1.90029	0.261819	3.92845e-13	2.95521e-12	64.7509	13.586	1.33804	0.270896	7.84025e-07	3.87989e-06
FBgn0003016	osp	2L	14599196	14689340	-	6846	433.633	63.3411	1338.76	195.554	1.61827	0.0855269	7.63765e-80	6.57809e-78	1098.95	160.524	1.33544	0.0867339	1.71443e-53	1.25204e-51
FBgn0016685	Nlp	3R	30004785	30010352	+	1080	3728.43	3452.25	10441.6	9668.13	1.48546	0.0818038	1.0925e-73	8.28588e-72	9392.05	8696.34	1.33253	0.0819223	1.72547e-59	1.50328e-57
FBgn0267967	corolla	X	17629791	17632047	-	1984	8.86895	4.47024	10.8554	5.47145	0.326546	0.532353	0.539611	0.651624	22.2376	11.2085	1.32874	0.513482	0.00966171	0.0237584
FBgn0040502	CG8343	2R	6179726	6180356	+	631	0.857251	1.35856	1.30625	2.07013	0.697121	1.57365	0.657769	0.752381	2.06954	3.27978	1.32799	1.54579	0.390283	0.525786
FBgn0053774	CG33774	2R	9399753	9400329	-	310	0.85022	2.74265	4.01358	12.947	2.2548	1.44213	0.117931	0.195487	2.05457	6.62764	1.32766	1.50856	0.378815	0.514066
FBgn0029951	CG11369	X	7574290	7576767	+	2478	2.68383	1.08306	1.27495	0.514507	-0.936954	1.13665	0.409762	0.532261	6.24969	2.52207	1.3251	0.986872	0.179361	0.288115
FBgn0024319	Nach	2R	16653205	16655046	-	1662	1.44113	0.867104	1.4971	0.900785	0.0147505	1.31485	0.991049	0.995064	3.89518	2.34367	1.32355	1.24314	0.287019	0.416522
FBgn0038546	CG7379	3R	17796376	17798304	-	1787	247.645	138.582	587.28	328.64	1.24258	0.109848	1.14692e-29	2.37881e-28	619.854	346.868	1.32279	0.110545	5.34807e-33	1.73585e-31
FBgn0054010	Glyat	2L	8009603	8010652	-	876	3.6403	4.15559	5.77088	6.58777	0.69347	0.753923	0.357669	0.478982	8.93841	10.2037	1.32022	0.740854	0.0747454	0.141995
FBgn0035582	CG13705	3L	4896864	4898470	+	1536	13.5848	8.84428	50.0598	32.591	1.89398	0.365395	2.17883e-07	1.00151e-06	33.9994	22.1351	1.32011	0.377968	0.000478279	0.00155951
FBgn0265762	CG44569	2R	19842495	19843668	-	1174	3.90664	3.32763	9.4239	8.02717	1.3771	0.735102	0.0610196	0.111717	9.10165	7.75268	1.32002	0.746242	0.0769125	0.145172
FBgn0015586	Acp76A	3L	19050757	19052026	-	1201	0.491696	0.409406	1.30625	1.08764	1.60964	1.95598	0.410544	0.5328	1.12581	0.937394	1.31994	2.01054	0.511496	0.639418
FBgn0037000	ZnT77C	3L	20484293	20494921	-	2536	9.05331	3.56992	15.5676	6.13866	0.71263	0.50552	0.158629	0.25084	23.4078	9.23022	1.31891	0.498445	0.00814358	0.0203907
FBgn0030085	CG6999	X	9088367	9089314	+	875	59.2841	67.7532	87.7726	100.311	0.558521	0.200259	0.0052872	0.0126414	148.744	169.993	1.31381	0.19588	1.98349e-11	1.6308e-10
FBgn0039756	CG9743	3R	30196360	30202998	-	1733	576.223	332.5	1353.46	780.994	1.23343	0.0869714	1.18317e-45	4.47008e-44	1430.63	825.523	1.31205	0.0873498	5.38156e-51	3.51643e-49
FBgn0004858	elB	2L	14390628	14409549	-	3326	197.2	59.2904	222.729	66.9661	0.164828	0.13456	0.220598	0.327385	490.185	147.38	1.31139	0.130242	7.5823e-24	1.54635e-22
FBgn0033907	mRpS16	2R	14172986	14173596	-	546	15.4466	28.2904	28.7976	52.7429	0.947754	0.38831	0.0146582	0.0318723	37.9357	69.4793	1.31093	0.387206	0.000710196	0.00224639
FBgn0262620	lncRNA:CR43144	2L	21657625	21658249	+	569	32.744	57.5465	11.7885	20.7179	-1.50995	0.337989	7.9161e-06	2.9654e-05	81.5449	143.313	1.30957	0.2725	1.54172e-06	7.36525e-06
FBgn0052088	sunn	3L	11728348	11732016	+	3003	8.51746	2.83632	4.5975	1.53097	-0.885753	0.596512	0.137574	0.222673	20.7867	6.92199	1.30504	0.515777	0.0113988	0.0274988
FBgn0033661	CG13185	2R	11867876	11885585	-	16988	1509.3	88.8453	4345.89	255.821	1.52457	0.0821596	7.2761e-77	5.86881e-75	3722.76	219.14	1.30102	0.082498	4.98222e-56	3.92725e-54
FBgn0259822	Ca-beta	2L	11156118	11203544	-	8354	5.84769	0.699987	22.5386	2.69794	1.92362	0.548238	0.000450241	0.0013029	14.5032	1.73608	1.3003	0.568398	0.0221571	0.0494971
FBgn0082975	snoRNA:Psi28S-3305b	3R	28602340	28602489	+	150	0.85022	5.66813	2.12461	14.1641	1.45019	1.5451	0.347948	0.469303	1.9831	13.2206	1.29557	1.57524	0.410816	0.5468
FBgn0031463	G6P	2L	2814336	2815760	-	1194	0.85022	0.712077	2.23846	1.87475	1.4392	1.46613	0.326282	0.4466	1.96812	1.64834	1.29554	1.49748	0.386957	0.522416
FBgn0023095	caps	3L	13228692	13279642	+	4841	152.803	31.5644	297.59	61.4729	0.953393	0.139809	9.15298e-12	6.11583e-11	375.274	77.5199	1.29468	0.139584	1.77134e-20	2.93216e-19
FBgn0263392	Tet	3L	2786207	2879158	-	13823	894.324	64.6982	3165.73	229.019	1.82052	0.0925175	3.35954e-86	3.22104e-84	2196.48	158.9	1.29412	0.0932543	8.69877e-44	4.4998e-42
FBgn0032631	CG15140	2L	17286240	17287663	+	1266	42.5987	33.6483	106.715	84.2928	1.31008	0.211512	5.87001e-10	3.41678e-09	105.373	83.233	1.29264	0.214562	1.69603e-09	1.15298e-08
FBgn0037781	Fancl	3R	10051508	10052869	-	1248	11.5867	9.28425	27.207	21.8005	1.29904	0.433902	0.00275479	0.00694885	26.9466	21.5918	1.29208	0.439519	0.0032847	0.00901953
FBgn0037110	ORMDL	3L	21635305	21636251	+	674	147.435	218.746	340.856	505.721	1.20405	0.12321	1.48011e-22	2.06626e-21	361.266	536.003	1.29033	0.124265	2.94114e-25	6.43424e-24
FBgn0264704	lncRNA:CR43973	3L	15098534	15099502	-	518	70.7377	136.559	136.443	263.404	0.944471	0.172211	4.14957e-08	2.03927e-07	173.231	334.422	1.2867	0.171862	7.05447e-14	7.20833e-13
FBgn0031453	Bacc	2L	2752445	2757975	+	2718	23113.2	8503.76	70189.3	25823.9	1.6024	0.076999	3.4667e-96	3.87166e-94	56347.5	20731.2	1.28551	0.0770264	1.56882e-62	1.58995e-60
FBgn0051551	CG31551	3R	5627852	5632033	+	4182	2.29838	0.549588	3.6653	0.876446	0.650517	0.943857	0.49069	0.60875	5.76767	1.37917	1.28392	0.927124	0.166102	0.271515
FBgn0263390	Nha2	3R	22981459	22998528	-	2796	3.88674	1.39011	6.65951	2.3818	0.78017	0.727221	0.283356	0.40017	9.53682	3.41088	1.28375	0.719679	0.0744589	0.141509
FBgn0032780	CG13085	2L	19424050	19430270	+	1433	5.97967	4.17283	14.007	9.7746	1.29423	0.578331	0.0252293	0.0517572	13.9087	9.70599	1.28091	0.586755	0.0290333	0.062622
FBgn0003011	ort	3R	19659748	19663672	+	2158	0.85022	0.393985	0.799336	0.370406	-0.0318157	1.73973	0.985409	0.990958	1.95315	0.905074	1.27674	1.63471	0.434792	0.570538
FBgn0053510	CG33510	2L	21082643	21084326	-	1566	1.34192	0.856907	0.577181	0.36857	-1.1997	1.63472	0.463017	0.582598	3.02825	1.93375	1.27313	1.36864	0.352259	0.486868
FBgn0013269	Fkbp39	3R	15331584	15333133	-	1299	2600.87	2002.21	8572.8	6599.53	1.72128	0.106949	2.79208e-58	1.50844e-56	6278.52	4833.35	1.27136	0.107156	1.8073e-32	5.7166e-31
FBgn0037021	CG11399	3L	20780350	20786197	-	4254	376.727	88.5582	1035.23	243.355	1.44853	0.103216	9.65009e-45	3.50264e-43	913.371	214.709	1.26832	0.104237	4.62049e-34	1.58791e-32
FBgn0265651	lncRNA:CR44458	2R	15371695	15372595	+	901	3.90664	4.33589	1.33755	1.48452	-1.47375	1.00189	0.141301	0.22751	8.90267	9.88088	1.26832	0.814007	0.119206	0.208296
FBgn0039407	CG14544	3R	26059496	26061293	+	1069	28.6319	26.7838	83.582	78.1871	1.55309	0.251802	6.92053e-10	3.99621e-09	68.764	64.3255	1.26685	0.258413	9.46593e-07	4.62448e-06
FBgn0262636	dati	4	375640	395605	-	6175	13.008	2.10655	47.9751	7.76924	1.90499	0.367619	2.19557e-07	1.00829e-06	30.9862	5.018	1.26482	0.382067	0.000931452	0.0028677
FBgn0263132	Cht6	X	10016845	10050803	+	16205	166.147	10.2528	429.682	26.5154	1.37158	0.145076	3.25637e-21	4.2105e-20	398.482	24.5901	1.26407	0.146523	6.29172e-18	8.82617e-17
FBgn0034232	CG4866	2R	17518223	17519027	+	692	50.2744	72.6509	124.496	179.907	1.34095	0.217116	6.56537e-10	3.80193e-09	118.963	171.912	1.26374	0.220169	9.47554e-09	5.9448e-08
FBgn0069923	CG41128	3R	3750363	3752353	+	364	8.76391	24.0767	10.6362	29.2204	0.315975	0.525442	0.547606	0.658912	20.95	57.5549	1.26289	0.507347	0.0128032	0.0304651
FBgn0267763	lncRNA:CR46094	3R	24573770	24574304	+	535	1.45519	2.71998	2.52322	4.71629	0.680081	1.19079	0.567921	0.677042	3.69234	6.90157	1.25792	1.17391	0.283917	0.412683
FBgn0039765	mRpS18C	3R	30423974	30424556	+	528	10.4772	19.8432	17.3731	32.9037	0.759241	0.465825	0.103126	0.174599	24.2202	45.8716	1.2557	0.461299	0.00648682	0.0166564
FBgn0265934	lncRNA:CR44723	3L	11324326	11325000	-	675	45.2556	67.0453	113.146	167.623	1.30337	0.223358	5.36762e-09	2.85758e-08	109.068	161.582	1.24893	0.226427	3.47151e-08	2.0511e-07
FBgn0034647	pirk	2R	21660967	21662995	-	1846	107.492	58.2297	63.7032	34.5088	-0.769348	0.187591	4.11036e-05	0.000139292	255.465	138.389	1.24873	0.17018	2.1731e-13	2.12225e-12
FBgn0000008	a	2R	22136968	22172834	+	5414	60.7677	11.2242	112.498	20.7792	0.894446	0.202316	9.82298e-06	3.62363e-05	142.449	26.3112	1.24511	0.201856	6.90217e-10	4.8931e-09
FBgn0001075	ft	2L	4198404	4221796	-	16852	52.9299	3.14087	158.215	9.3885	1.57167	0.194318	6.05843e-16	5.5024e-15	126.149	7.4857	1.24353	0.19924	4.33785e-10	3.14478e-09
FBgn0052855	CG32855	3R	16078980	16080992	-	2013	2.53076	1.25721	4.33176	2.15189	0.712957	0.891924	0.424089	0.546052	6.38106	3.16992	1.24157	0.881409	0.158948	0.262194
FBgn0263605	l(3)72Dn	3L	16226126	16228737	-	2323	76.5415	32.9494	235.354	101.315	1.65217	0.176288	7.11542e-21	8.99428e-20	176.774	76.0973	1.24073	0.18055	6.3348e-12	5.49495e-11
[truncated: 9,381 more rows]

## Sheet: KO1 FC
FB gene ID	Gene Name	KO1 Mean Normalized Count	KO1 Mean Normalized Count per Kb	KO1_v_WT log2 Fold Change	KO1_v_WT log2 Fold Change StdErr	KO1_v_WT p-value	KO1_v_WT padj
[truncated: 1,779 more rows]

[truncated: 5 more sheets: KO2 FC, KO1+PRE, KO2+PRE, KO1+KO2+PRE, Up in Pum KO1+KO2+KD+PRE]
