# Supplementary material
Source: HighWire-hosted journal article supplement (doi:10.1101/rna.079813.123)
Supplement: Supplemental_TableS4.xlsx [file Supplemental_TableS4.xlsx]

## Sheet: method
Data analysis method for Pum RIP-Seq using the r package ' fishpound/swish'
	raw reads
	⇩
	trim galore: For adapter trimming & FastQC
	⇩
	sortMeRNA: remove rRNA, tRNA,7SLRNA
	⇩
	salmon: alignment to transcriptome
	⇩
	swish: differentially expressedtranscripts
	⇩
	result

## Sheet: swish_out_file
gene_id	tx_name	log10mean	keep	stat	log2FC	pvalue	locfdr	qvalue
FBgn0001142	FBtr0300568	2.89236	TRUE	4.5	8.27559	7.68817e-07	1.8858e-05	5.20562e-06
FBgn0283521	FBtr0089347	2.34074	TRUE	4.5	6.42515	7.68817e-07	1.8858e-05	5.20562e-06
FBgn0010313	FBtr0345141	2.23152	TRUE	4.5	5.88893	7.68817e-07	1.8858e-05	5.20562e-06
FBgn0004648	FBtr0344737	2.11967	TRUE	4.5	5.72468	7.68817e-07	1.8858e-05	5.20562e-06
FBgn0265605	FBtr0300576	2.09876	TRUE	4.5	5.70155	7.68817e-07	1.8858e-05	5.20562e-06
FBgn0051163	FBtr0305036	2.45255	TRUE	4.5	5.34009	7.68817e-07	1.8858e-05	5.20562e-06
FBgn0003165	FBtr0081991	2.94976	TRUE	4.5	5.2869	7.68817e-07	1.8858e-05	5.20562e-06
FBgn0052479	FBtr0072589	4.44547	TRUE	4.5	5.19436	7.68817e-07	1.8858e-05	5.20562e-06
FBgn0003165	FBtr0081990	4.52913	TRUE	4.5	4.79369	7.68817e-07	1.8858e-05	5.20562e-06
FBgn0037720	FBtr0334617	1.84956	TRUE	4.5	4.77022	7.68817e-07	1.8858e-05	5.20562e-06
FBgn0052479	FBtr0333267	3.19085	TRUE	4.5	4.71432	7.68817e-07	1.8858e-05	5.20562e-06
FBgn0038872	FBtr0339192	1.8033	TRUE	4.5	4.70403	7.68817e-07	1.8858e-05	5.20562e-06
FBgn0039830	FBtr0306237	3.21628	TRUE	4.5	4.69955	7.68817e-07	1.8858e-05	5.20562e-06
FBgn0003165	FBtr0081993	2.87811	TRUE	4.5	4.69035	7.68817e-07	1.8858e-05	5.20562e-06
FBgn0003165	FBtr0081994	1.81334	TRUE	4.5	4.68015	7.68817e-07	1.8858e-05	5.20562e-06
FBgn0052640	FBtr0073728	1.78061	TRUE	4.5	4.61758	7.68817e-07	1.8858e-05	5.20562e-06
FBgn0003165	FBtr0081992	4.00407	TRUE	4.5	4.04396	7.68817e-07	1.8858e-05	5.20562e-06
FBgn0011225	FBtr0301370	1.57626	TRUE	4.5	4.01311	7.68817e-07	1.8858e-05	5.20562e-06
FBgn0030753	FBtr0074278	1.57703	TRUE	4.5	3.89853	7.68817e-07	1.8858e-05	5.20562e-06
FBgn0005278	FBtr0089435	2.63452	TRUE	4.5	3.74499	7.68817e-07	1.8858e-05	5.20562e-06
FBgn0267376	FBtr0306641	1.47294	TRUE	4.5	3.60355	7.68817e-07	1.8858e-05	5.20562e-06
FBgn0031077	FBtr0308650	1.35463	TRUE	4.5	3.25942	7.68817e-07	1.8858e-05	5.20562e-06
FBgn0261269	FBtr0339967	1.31806	TRUE	4.5	2.98641	7.68817e-07	1.8858e-05	5.20562e-06
FBgn0038197	FBtr0082887	2.83278	TRUE	4.5	2.97911	7.68817e-07	1.8858e-05	5.20562e-06
FBgn0036581	FBtr0333560	2.85575	TRUE	4.5	2.96344	7.68817e-07	1.8858e-05	5.20562e-06
FBgn0027343	FBtr0070138	3.13756	TRUE	4.5	2.95365	7.68817e-07	1.8858e-05	5.20562e-06
FBgn0031275	FBtr0078001	1.22709	TRUE	4.5	2.88637	7.68817e-07	1.8858e-05	5.20562e-06
FBgn0028979	FBtr0089377	1.83663	TRUE	4.5	2.88529	7.68817e-07	1.8858e-05	5.20562e-06
FBgn0038828	FBtr0334723	2.37083	TRUE	4.5	2.7756	7.68817e-07	1.8858e-05	5.20562e-06
FBgn0003430	FBtr0077499	2.34795	TRUE	4.5	2.73227	7.68817e-07	1.8858e-05	5.20562e-06
FBgn0037110	FBtr0078423	2.76289	TRUE	4.5	2.72177	7.68817e-07	1.8858e-05	5.20562e-06
FBgn0028421	FBtr0343146	1.19046	TRUE	4.5	2.72171	7.68817e-07	1.8858e-05	5.20562e-06
FBgn0030420	FBtr0073704	2.68589	TRUE	4.5	2.66796	7.68817e-07	1.8858e-05	5.20562e-06
FBgn0001215	FBtr0085303	1.15517	TRUE	4.5	2.62145	7.68817e-07	1.8858e-05	5.20562e-06
FBgn0262736	FBtr0086152	2.82216	TRUE	4.5	2.61748	7.68817e-07	1.8858e-05	5.20562e-06
FBgn0035639	FBtr0310534	2.7635	TRUE	4.5	2.56236	7.68817e-07	1.8858e-05	5.20562e-06
FBgn0262736	FBtr0086150	4.13573	TRUE	4.5	2.55995	7.68817e-07	1.8858e-05	5.20562e-06
FBgn0030868	FBtr0074474	1.56343	TRUE	4.5	2.52075	7.68817e-07	1.8858e-05	5.20562e-06
FBgn0085322	FBtr0112489	1.63738	TRUE	4.5	2.50721	7.68817e-07	1.8858e-05	5.20562e-06
FBgn0036502	FBtr0075604	2.70913	TRUE	4.5	2.43921	7.68817e-07	1.8858e-05	5.20562e-06
FBgn0040809	FBtr0075674	2.70102	TRUE	4.5	2.37604	7.68817e-07	1.8858e-05	5.20562e-06
FBgn0040487	FBtr0075673	2.58158	TRUE	4.5	2.35882	7.68817e-07	1.8858e-05	5.20562e-06
FBgn0066114	FBtr0070644	3.07519	TRUE	4.5	2.35353	7.68817e-07	1.8858e-05	5.20562e-06
FBgn0000411	FBtr0333035	2.4911	TRUE	4.5	2.32489	7.68817e-07	1.8858e-05	5.20562e-06
FBgn0031195	FBtr0333713	2.33566	TRUE	4.5	2.31228	7.68817e-07	1.8858e-05	5.20562e-06
FBgn0263051	FBtr0306976	2.89671	TRUE	4.5	2.25831	7.68817e-07	1.8858e-05	5.20562e-06
FBgn0030931	FBtr0074592	2.55494	TRUE	4.5	2.2466	7.68817e-07	1.8858e-05	5.20562e-06
FBgn0033871	FBtr0087632	2.5954	TRUE	4.5	2.22117	7.68817e-07	1.8858e-05	5.20562e-06
FBgn0052428	FBtr0078222	2.84192	TRUE	4.5	2.20577	7.68817e-07	1.8858e-05	5.20562e-06
FBgn0040890	FBtr0300214	2.37667	TRUE	4.5	2.18979	7.68817e-07	1.8858e-05	5.20562e-06
FBgn0035679	FBtr0077063	2.86353	TRUE	4.5	2.17482	7.68817e-07	1.8858e-05	5.20562e-06
FBgn0028789	FBtr0076522	2.3357	TRUE	4.5	2.16405	7.68817e-07	1.8858e-05	5.20562e-06
FBgn0039280	FBtr0084782	2.97621	TRUE	4.5	2.15807	7.68817e-07	1.8858e-05	5.20562e-06
FBgn0035998	FBtr0301032	3.37613	TRUE	4.5	2.14844	7.68817e-07	1.8858e-05	5.20562e-06
FBgn0032014	FBtr0079598	3.62822	TRUE	4.5	2.12437	7.68817e-07	1.8858e-05	5.20562e-06
FBgn0030481	FBtr0342624	3.34505	TRUE	4.5	2.11777	7.68817e-07	1.8858e-05	5.20562e-06
FBgn0029502	FBtr0070963	2.87633	TRUE	4.5	2.09877	7.68817e-07	1.8858e-05	5.20562e-06
FBgn0031818	FBtr0079267	3.2107	TRUE	4.5	2.05995	7.68817e-07	1.8858e-05	5.20562e-06
FBgn0034803	FBtr0302895	2.52527	TRUE	4.5	2.04807	7.68817e-07	1.8858e-05	5.20562e-06
FBgn0025776	FBtr0333875	1.35294	TRUE	4.5	2.03432	7.68817e-07	1.8858e-05	5.20562e-06
FBgn0263993	FBtr0330264	2.58106	TRUE	4.5	1.99476	7.68817e-07	1.8858e-05	5.20562e-06
FBgn0262736	FBtr0086153	2.75147	TRUE	4.5	1.99408	7.68817e-07	1.8858e-05	5.20562e-06
FBgn0029854	FBtr0089870	2.84513	TRUE	4.5	1.97755	7.68817e-07	1.8858e-05	5.20562e-06
FBgn0031818	FBtr0303229	2.26767	TRUE	4.5	1.97429	7.68817e-07	1.8858e-05	5.20562e-06
FBgn0003742	FBtr0089617	3.10563	TRUE	4.5	1.966	7.68817e-07	1.8858e-05	5.20562e-06
FBgn0036502	FBtr0334085	2.98053	TRUE	4.5	1.95995	7.68817e-07	1.8858e-05	5.20562e-06
FBgn0039135	FBtr0084510	3.37628	TRUE	4.5	1.94409	7.68817e-07	1.8858e-05	5.20562e-06
FBgn0038533	FBtr0083490	1.745	TRUE	4.5	1.93847	7.68817e-07	1.8858e-05	5.20562e-06
FBgn0031719	FBtr0079103	2.58704	TRUE	4.5	1.9338	7.68817e-07	1.8858e-05	5.20562e-06
FBgn0031988	FBtr0079576	3.75013	TRUE	4.5	1.89715	7.68817e-07	1.8858e-05	5.20562e-06
FBgn0003742	FBtr0089619	2.47667	TRUE	4.5	1.89532	7.68817e-07	1.8858e-05	5.20562e-06
FBgn0085444	FBtr0112692	2.9831	TRUE	4.5	1.88038	7.68817e-07	1.8858e-05	5.20562e-06
FBgn0029929	FBtr0071009	2.24599	TRUE	4.5	1.85916	7.68817e-07	1.8858e-05	5.20562e-06
FBgn0034808	FBtr0071988	3.32056	TRUE	4.5	1.84569	7.68817e-07	1.8858e-05	5.20562e-06
FBgn0044028	FBtr0075435	2.43134	TRUE	4.5	1.84445	7.68817e-07	1.8858e-05	5.20562e-06
FBgn0259238	FBtr0299853	2.72883	TRUE	4.5	1.84396	7.68817e-07	1.8858e-05	5.20562e-06
FBgn0030794	FBtr0074334	3.04161	TRUE	4.5	1.84259	7.68817e-07	1.8858e-05	5.20562e-06
FBgn0042125	FBtr0321267	2.85722	TRUE	4.5	1.83804	7.68817e-07	1.8858e-05	5.20562e-06
FBgn0011476	FBtr0334696	1.93737	TRUE	4.5	1.83699	7.68817e-07	1.8858e-05	5.20562e-06
FBgn0031378	FBtr0077814	2.85639	TRUE	4.5	1.82988	7.68817e-07	1.8858e-05	5.20562e-06
FBgn0038197	FBtr0305052	3.12959	TRUE	4.5	1.82898	7.68817e-07	1.8858e-05	5.20562e-06
FBgn0032197	FBtr0079953	2.35808	TRUE	4.5	1.81466	7.68817e-07	1.8858e-05	5.20562e-06
FBgn0266724	FBtr0075491	2.18023	TRUE	4.5	1.81385	7.68817e-07	1.8858e-05	5.20562e-06
FBgn0038418	FBtr0301514	2.95466	TRUE	4.5	1.79225	7.68817e-07	1.8858e-05	5.20562e-06
FBgn0037720	FBtr0334616	2.67917	TRUE	4.5	1.78101	7.68817e-07	1.8858e-05	5.20562e-06
FBgn0033547	FBtr0332886	2.83977	TRUE	4.5	1.76991	7.68817e-07	1.8858e-05	5.20562e-06
FBgn0030673	FBtr0339683	2.00407	TRUE	4.5	1.76606	7.68817e-07	1.8858e-05	5.20562e-06
FBgn0028397	FBtr0301652	1.30343	TRUE	4.5	1.76096	7.68817e-07	1.8858e-05	5.20562e-06
FBgn0032715	FBtr0081121	2.87069	TRUE	4.5	1.75802	7.68817e-07	1.8858e-05	5.20562e-06
FBgn0037134	FBtr0078440	2.90552	TRUE	4.5	1.74935	7.68817e-07	1.8858e-05	5.20562e-06
FBgn0035639	FBtr0310533	2.2338	TRUE	4.5	1.74367	7.68817e-07	1.8858e-05	5.20562e-06
FBgn0011704	FBtr0088046	3.82141	TRUE	4.5	1.74091	7.68817e-07	1.8858e-05	5.20562e-06
FBgn0033683	FBtr0333061	2.22125	TRUE	4.5	1.73265	7.68817e-07	1.8858e-05	5.20562e-06
FBgn0031091	FBtr0070027	3.39745	TRUE	4.5	1.72865	7.68817e-07	1.8858e-05	5.20562e-06
FBgn0037603	FBtr0081879	2.28424	TRUE	4.5	1.71176	7.68817e-07	1.8858e-05	5.20562e-06
FBgn0015664	FBtr0079889	2.55803	TRUE	4.5	1.7116	7.68817e-07	1.8858e-05	5.20562e-06
FBgn0002283	FBtr0307336	3.43066	TRUE	4.5	1.70028	7.68817e-07	1.8858e-05	5.20562e-06
FBgn0030703	FBtr0301598	3.4512	TRUE	4.5	1.69897	7.68817e-07	1.8858e-05	5.20562e-06
FBgn0030608	FBtr0110968	3.86675	TRUE	4.5	1.68354	7.68817e-07	1.8858e-05	5.20562e-06
FBgn0028664	FBtr0073256	2.5285	TRUE	4.5	1.68112	7.68817e-07	1.8858e-05	5.20562e-06
FBgn0029854	FBtr0089869	1.65417	TRUE	4.5	1.68061	7.68817e-07	1.8858e-05	5.20562e-06
FBgn0036173	FBtr0076098	2.20894	TRUE	4.5	1.67425	7.68817e-07	1.8858e-05	5.20562e-06
FBgn0061515	FBtr0075783	2.91106	TRUE	4.5	1.65091	7.68817e-07	1.8858e-05	5.20562e-06
FBgn0020910	FBtr0336783	3.24062	TRUE	4.5	1.64943	7.68817e-07	1.8858e-05	5.20562e-06
FBgn0000251	FBtr0081413	3.61265	TRUE	4.5	1.64823	7.68817e-07	1.8858e-05	5.20562e-06
FBgn0039757	FBtr0339183	2.20239	TRUE	4.5	1.63264	7.68817e-07	1.8858e-05	5.20562e-06
FBgn0032445	FBtr0340541	2.72378	TRUE	4.5	1.63095	7.68817e-07	1.8858e-05	5.20562e-06
FBgn0035965	FBtr0076537	2.86472	TRUE	4.5	1.6291	7.68817e-07	1.8858e-05	5.20562e-06
FBgn0034231	FBtr0086951	2.63399	TRUE	4.5	1.61891	7.68817e-07	1.8858e-05	5.20562e-06
FBgn0011476	FBtr0301089	2.42195	TRUE	4.5	1.61843	7.68817e-07	1.8858e-05	5.20562e-06
FBgn0035639	FBtr0077112	2.41413	TRUE	4.5	1.61242	7.68817e-07	1.8858e-05	5.20562e-06
FBgn0030447	FBtr0073721	2.83468	TRUE	4.5	1.60728	7.68817e-07	1.8858e-05	5.20562e-06
FBgn0036144	FBtr0306255	2.88597	TRUE	4.5	1.60572	7.68817e-07	1.8858e-05	5.20562e-06
FBgn0031491	FBtr0077670	3.36235	TRUE	4.5	1.60297	7.68817e-07	1.8858e-05	5.20562e-06
FBgn0005648	FBtr0088785	3.11154	TRUE	4.5	1.60025	7.68817e-07	1.8858e-05	5.20562e-06
FBgn0028397	FBtr0074255	2.92572	TRUE	4.5	1.59497	7.68817e-07	1.8858e-05	5.20562e-06
FBgn0031677	FBtr0079029	2.65133	TRUE	4.5	1.5862	7.68817e-07	1.8858e-05	5.20562e-06
FBgn0003742	FBtr0089620	2.93887	TRUE	4.5	1.57804	7.68817e-07	1.8858e-05	5.20562e-06
FBgn0015218	FBtr0076491	3.10412	TRUE	4.5	1.57048	7.68817e-07	1.8858e-05	5.20562e-06
FBgn0036144	FBtr0100422	3.06672	TRUE	4.5	1.56428	7.68817e-07	1.8858e-05	5.20562e-06
FBgn0031359	FBtr0077910	2.42715	TRUE	4.5	1.56125	7.68817e-07	1.8858e-05	5.20562e-06
FBgn0033550	FBtr0088251	2.61285	TRUE	4.5	1.54827	7.68817e-07	1.8858e-05	5.20562e-06
FBgn0038877	FBtr0084102	2.9341	TRUE	4.5	1.51947	7.68817e-07	1.8858e-05	5.20562e-06
FBgn0032390	FBtr0080285	2.51352	TRUE	4.5	1.51467	7.68817e-07	1.8858e-05	5.20562e-06
FBgn0030294	FBtr0073456	3.30777	TRUE	4.5	1.51401	7.68817e-07	1.8858e-05	5.20562e-06
FBgn0033459	FBtr0088377	2.45012	TRUE	4.5	1.51192	7.68817e-07	1.8858e-05	5.20562e-06
FBgn0035678	FBtr0077064	1.63519	TRUE	4.5	1.51169	7.68817e-07	1.8858e-05	5.20562e-06
FBgn0002561	FBtr0070074	1.99387	TRUE	4.5	1.50652	7.68817e-07	1.8858e-05	5.20562e-06
FBgn0035824	FBtr0076748	2.66993	TRUE	4.5	1.50494	7.68817e-07	1.8858e-05	5.20562e-06
FBgn0052428	FBtr0300452	2.83655	TRUE	4.5	1.50386	7.68817e-07	1.8858e-05	5.20562e-06
FBgn0034946	FBtr0072154	2.72566	TRUE	4.5	1.50159	7.68817e-07	1.8858e-05	5.20562e-06
FBgn0027552	FBtr0073171	3.16876	TRUE	4.5	1.5003	7.68817e-07	1.8858e-05	5.20562e-06
FBgn0035444	FBtr0073076	2.77696	TRUE	4.5	1.49213	7.68817e-07	1.8858e-05	5.20562e-06
FBgn0000077	FBtr0307281	2.82098	TRUE	4.5	1.48489	7.68817e-07	1.8858e-05	5.20562e-06
FBgn0014877	FBtr0087675	3.27901	TRUE	4.5	1.47664	7.68817e-07	1.8858e-05	5.20562e-06
FBgn0034091	FBtr0087194	2.47947	TRUE	4.5	1.45092	7.68817e-07	1.8858e-05	5.20562e-06
FBgn0032231	FBtr0080003	3.30118	TRUE	4.5	1.45091	7.68817e-07	1.8858e-05	5.20562e-06
FBgn0037922	FBtr0082416	3.07608	TRUE	4.5	1.45058	7.68817e-07	1.8858e-05	5.20562e-06
FBgn0035964	FBtr0100532	2.54838	TRUE	4.5	1.4495	7.68817e-07	1.8858e-05	5.20562e-06
FBgn0030482	FBtr0073777	2.45607	TRUE	4.5	1.44251	7.68817e-07	1.8858e-05	5.20562e-06
FBgn0036058	FBtr0076356	3.24712	TRUE	4.5	1.43774	7.68817e-07	1.8858e-05	5.20562e-06
FBgn0010105	FBtr0075579	1.91427	TRUE	4.5	1.43358	7.68817e-07	1.8858e-05	5.20562e-06
FBgn0037720	FBtr0082075	3.18703	TRUE	4.5	1.43328	7.68817e-07	1.8858e-05	5.20562e-06
FBgn0042180	FBtr0071688	3.43927	TRUE	4.5	1.43039	7.68817e-07	1.8858e-05	5.20562e-06
FBgn0067622	FBtr0091657	2.0095	TRUE	4.5	1.42949	7.68817e-07	1.8858e-05	5.20562e-06
FBgn0032293	FBtr0080112	2.56531	TRUE	4.5	1.42864	7.68817e-07	1.8858e-05	5.20562e-06
FBgn0038976	FBtr0084257	3.20265	TRUE	4.5	1.42457	7.68817e-07	1.8858e-05	5.20562e-06
FBgn0036847	FBtr0075034	2.55149	TRUE	4.5	1.42134	7.68817e-07	1.8858e-05	5.20562e-06
FBgn0083952	FBtr0110816	2.42522	TRUE	4.5	1.41604	7.68817e-07	1.8858e-05	5.20562e-06
FBgn0038545	FBtr0083513	2.07594	TRUE	4.5	1.4093	7.68817e-07	1.8858e-05	5.20562e-06
FBgn0040239	FBtr0077084	3.21038	TRUE	4.5	1.40231	7.68817e-07	1.8858e-05	5.20562e-06
FBgn0036932	FBtr0074872	2.48489	TRUE	4.5	1.40195	7.68817e-07	1.8858e-05	5.20562e-06
FBgn0029929	FBtr0343331	2.8954	TRUE	4.5	1.40088	7.68817e-07	1.8858e-05	5.20562e-06
FBgn0036777	FBtr0075123	2.75492	TRUE	4.5	1.39587	7.68817e-07	1.8858e-05	5.20562e-06
FBgn0013750	FBtr0087376	2.64107	TRUE	4.5	1.39419	7.68817e-07	1.8858e-05	5.20562e-06
FBgn0033092	FBtr0086121	2.35845	TRUE	4.5	1.38873	7.68817e-07	1.8858e-05	5.20562e-06
FBgn0032751	FBtr0081151	1.98074	TRUE	4.5	1.38861	7.68817e-07	1.8858e-05	5.20562e-06
FBgn0033665	FBtr0088038	2.55174	TRUE	4.5	1.38771	7.68817e-07	1.8858e-05	5.20562e-06
FBgn0037610	FBtr0081902	3.02832	TRUE	4.5	1.38665	7.68817e-07	1.8858e-05	5.20562e-06
FBgn0031534	FBtr0077517	3.50122	TRUE	4.5	1.38575	7.68817e-07	1.8858e-05	5.20562e-06
FBgn0000533	FBtr0083083	2.62562	TRUE	4.5	1.37921	7.68817e-07	1.8858e-05	5.20562e-06
FBgn0031359	FBtr0305618	2.83916	TRUE	4.5	1.37752	7.68817e-07	1.8858e-05	5.20562e-06
FBgn0015338	FBtr0080850	2.87887	TRUE	4.5	1.37713	7.68817e-07	1.8858e-05	5.20562e-06
FBgn0036342	FBtr0075887	2.04493	TRUE	4.5	1.37478	7.68817e-07	1.8858e-05	5.20562e-06
FBgn0037350	FBtr0113194	2.16937	TRUE	4.5	1.37196	7.68817e-07	1.8858e-05	5.20562e-06
FBgn0036255	FBtr0300011	1.6162	TRUE	4.5	1.37029	7.68817e-07	1.8858e-05	5.20562e-06
FBgn0029117	FBtr0076897	2.74465	TRUE	4.5	1.36661	7.68817e-07	1.8858e-05	5.20562e-06
FBgn0052428	FBtr0303381	2.51477	TRUE	4.5	1.36487	7.68817e-07	1.8858e-05	5.20562e-06
FBgn0003042	FBtr0078405	3.30035	TRUE	4.5	1.35984	7.68817e-07	1.8858e-05	5.20562e-06
FBgn0033259	FBtr0088781	3.36966	TRUE	4.5	1.35836	7.68817e-07	1.8858e-05	5.20562e-06
FBgn0015521	FBtr0273293	2.89029	TRUE	4.5	1.35573	7.68817e-07	1.8858e-05	5.20562e-06
FBgn0028663	FBtr0078369	2.94401	TRUE	4.5	1.35457	7.68817e-07	1.8858e-05	5.20562e-06
FBgn0010314	FBtr0079799	3.0799	TRUE	4.5	1.35224	7.68817e-07	1.8858e-05	5.20562e-06
FBgn0000216	FBtr0075621	2.21903	TRUE	4.5	1.35188	7.68817e-07	1.8858e-05	5.20562e-06
FBgn0040623	FBtr0085435	2.68461	TRUE	4.5	1.35121	7.68817e-07	1.8858e-05	5.20562e-06
FBgn0015790	FBtr0084011	3.54922	TRUE	4.5	1.34881	7.68817e-07	1.8858e-05	5.20562e-06
FBgn0031458	FBtr0335127	2.45245	TRUE	4.5	1.34856	7.68817e-07	1.8858e-05	5.20562e-06
FBgn0030673	FBtr0074055	2.53203	TRUE	4.5	1.346	7.68817e-07	1.8858e-05	5.20562e-06
FBgn0030109	FBtr0071334	2.79361	TRUE	4.5	1.34219	7.68817e-07	1.8858e-05	5.20562e-06
FBgn0033808	FBtr0087738	2.58871	TRUE	4.5	1.33122	7.68817e-07	1.8858e-05	5.20562e-06
FBgn0038224	FBtr0082931	3.17883	TRUE	4.5	1.33022	7.68817e-07	1.8858e-05	5.20562e-06
FBgn0031117	FBtr0077310	2.38853	TRUE	4.5	1.32574	7.68817e-07	1.8858e-05	5.20562e-06
FBgn0262782	FBtr0080050	4.08324	TRUE	4.5	1.32385	7.68817e-07	1.8858e-05	5.20562e-06
FBgn0035956	FBtr0076547	1.63911	TRUE	4.5	1.32362	7.68817e-07	1.8858e-05	5.20562e-06
FBgn0040366	FBtr0070250	2.925	TRUE	4.5	1.32324	7.68817e-07	1.8858e-05	5.20562e-06
FBgn0035065	FBtr0072375	2.83171	TRUE	4.5	1.31888	7.68817e-07	1.8858e-05	5.20562e-06
FBgn0033232	FBtr0088888	2.76772	TRUE	4.5	1.3118	7.68817e-07	1.8858e-05	5.20562e-06
FBgn0031377	FBtr0077869	3.37922	TRUE	4.5	1.31075	7.68817e-07	1.8858e-05	5.20562e-06
FBgn0032078	FBtr0079789	3.21164	TRUE	4.5	1.30844	7.68817e-07	1.8858e-05	5.20562e-06
FBgn0034184	FBtr0086974	2.92066	TRUE	4.5	1.30603	7.68817e-07	1.8858e-05	5.20562e-06
FBgn0029935	FBtr0071020	2.91833	TRUE	4.5	1.30492	7.68817e-07	1.8858e-05	5.20562e-06
FBgn0031317	FBtr0077979	2.73726	TRUE	4.5	1.30489	7.68817e-07	1.8858e-05	5.20562e-06
FBgn0030743	FBtr0333302	2.9154	TRUE	4.5	1.30301	7.68817e-07	1.8858e-05	5.20562e-06
FBgn0034876	FBtr0072114	3.3682	TRUE	4.5	1.30188	7.68817e-07	1.8858e-05	5.20562e-06
FBgn0032906	FBtr0081438	3.21706	TRUE	4.5	1.30132	7.68817e-07	1.8858e-05	5.20562e-06
FBgn0028662	FBtr0083005	3.39323	TRUE	4.5	1.30105	7.68817e-07	1.8858e-05	5.20562e-06
FBgn0031183	FBtr0339557	2.9025	TRUE	4.5	1.28878	7.68817e-07	1.8858e-05	5.20562e-06
FBgn0015221	FBtr0332168	2.58034	TRUE	4.5	1.28652	7.68817e-07	1.8858e-05	5.20562e-06
FBgn0039942	FBtr0113727	3.15863	TRUE	4.5	1.28487	7.68817e-07	1.8858e-05	5.20562e-06
FBgn0030996	FBtr0074671	2.93893	TRUE	4.5	1.27992	7.68817e-07	1.8858e-05	5.20562e-06
FBgn0033631	FBtr0339489	1.80495	TRUE	4.5	1.27527	7.68817e-07	1.8858e-05	5.20562e-06
FBgn0029176	FBtr0085393	2.57694	TRUE	4.5	1.27361	7.68817e-07	1.8858e-05	5.20562e-06
FBgn0020018	FBtr0084664	3.09062	TRUE	4.5	1.27336	7.68817e-07	1.8858e-05	5.20562e-06
FBgn0025558	FBtr0075314	2.24811	TRUE	4.5	1.27264	7.68817e-07	1.8858e-05	5.20562e-06
FBgn0026737	FBtr0083113	2.57661	TRUE	4.5	1.2686	7.68817e-07	1.8858e-05	5.20562e-06
FBgn0026085	FBtr0070642	2.68663	TRUE	4.5	1.26578	7.68817e-07	1.8858e-05	5.20562e-06
FBgn0063670	FBtr0113841	2.01123	TRUE	4.5	1.26508	7.68817e-07	1.8858e-05	5.20562e-06
FBgn0030099	FBtr0071305	2.20076	TRUE	4.5	1.26418	7.68817e-07	1.8858e-05	5.20562e-06
FBgn0030090	FBtr0071349	3.12244	TRUE	4.5	1.26355	7.68817e-07	1.8858e-05	5.20562e-06
FBgn0011837	FBtr0333756	2.75705	TRUE	4.5	1.26315	7.68817e-07	1.8858e-05	5.20562e-06
FBgn0030291	FBtr0073451	2.44319	TRUE	4.5	1.26303	7.68817e-07	1.8858e-05	5.20562e-06
FBgn0037552	FBtr0081795	2.27672	TRUE	4.5	1.26125	7.68817e-07	1.8858e-05	5.20562e-06
FBgn0261068	FBtr0080934	2.65509	TRUE	4.5	1.2596	7.68817e-07	1.8858e-05	5.20562e-06
FBgn0086655	FBtr0332950	2.5618	TRUE	4.5	1.25449	7.68817e-07	1.8858e-05	5.20562e-06
FBgn0052095	FBtr0076077	2.69952	TRUE	4.5	1.25445	7.68817e-07	1.8858e-05	5.20562e-06
FBgn0036449	FBtr0075699	2.91291	TRUE	4.5	1.24965	7.68817e-07	1.8858e-05	5.20562e-06
FBgn0032465	FBtr0080430	2.84368	TRUE	4.5	1.24813	7.68817e-07	1.8858e-05	5.20562e-06
FBgn0051122	FBtr0301432	3.2505	TRUE	4.5	1.2452	7.68817e-07	1.8858e-05	5.20562e-06
FBgn0034578	FBtr0071545	2.30662	TRUE	4.5	1.23798	7.68817e-07	1.8858e-05	5.20562e-06
FBgn0042092	FBtr0079372	2.76087	TRUE	4.5	1.23373	7.68817e-07	1.8858e-05	5.20562e-06
FBgn0037686	FBtr0082049	2.39296	TRUE	4.5	1.22025	7.68817e-07	1.8858e-05	5.20562e-06
FBgn0030608	FBtr0073967	4.19945	TRUE	4.5	1.22012	7.68817e-07	1.8858e-05	5.20562e-06
FBgn0016053	FBtr0342987	3.72386	TRUE	4.5	1.2186	7.68817e-07	1.8858e-05	5.20562e-06
FBgn0040020	FBtr0113739	2.90985	TRUE	4.5	1.20843	7.68817e-07	1.8858e-05	5.20562e-06
FBgn0050109	FBtr0340271	2.5483	TRUE	4.5	1.20062	7.68817e-07	1.8858e-05	5.20562e-06
FBgn0263050	FBtr0306974	3.02072	TRUE	4.5	1.20059	7.68817e-07	1.8858e-05	5.20562e-06
FBgn0029093	FBtr0088898	2.62893	TRUE	4.5	1.20014	7.68817e-07	1.8858e-05	5.20562e-06
FBgn0033777	FBtr0087816	2.71625	TRUE	4.5	1.19158	7.68817e-07	1.8858e-05	5.20562e-06
FBgn0030693	FBtr0074188	2.96135	TRUE	4.5	1.19061	7.68817e-07	1.8858e-05	5.20562e-06
FBgn0027615	FBtr0076272	3.23769	TRUE	4.5	1.18947	7.68817e-07	1.8858e-05	5.20562e-06
FBgn0032871	FBtr0081387	2.12646	TRUE	4.5	1.1861	7.68817e-07	1.8858e-05	5.20562e-06
FBgn0024194	FBtr0073029	2.98397	TRUE	4.5	1.18555	7.68817e-07	1.8858e-05	5.20562e-06
FBgn0034918	FBtr0072233	2.79096	TRUE	4.5	1.18179	7.68817e-07	1.8858e-05	5.20562e-06
FBgn0039044	FBtr0084359	2.80602	TRUE	4.5	1.17908	7.68817e-07	1.8858e-05	5.20562e-06
FBgn0031977	FBtr0079535	3.43195	TRUE	4.5	1.17358	7.68817e-07	1.8858e-05	5.20562e-06
FBgn0002962	FBtr0083732	3.70515	TRUE	4.5	1.17343	7.68817e-07	1.8858e-05	5.20562e-06
FBgn0262782	FBtr0345435	2.73754	TRUE	4.5	1.17242	7.68817e-07	1.8858e-05	5.20562e-06
FBgn0034059	FBtr0087202	2.45154	TRUE	4.5	1.17143	7.68817e-07	1.8858e-05	5.20562e-06
FBgn0263005	FBtr0346130	3.70215	TRUE	4.5	1.15439	7.68817e-07	1.8858e-05	5.20562e-06
FBgn0038903	FBtr0084166	2.58861	TRUE	4.5	1.1542	7.68817e-07	1.8858e-05	5.20562e-06
FBgn0039461	FBtr0085064	2.64383	TRUE	4.5	1.14712	7.68817e-07	1.8858e-05	5.20562e-06
FBgn0038043	FBtr0082587	3.00151	TRUE	4.5	1.14458	7.68817e-07	1.8858e-05	5.20562e-06
FBgn0031039	FBtr0074739	2.37085	TRUE	4.5	1.14359	7.68817e-07	1.8858e-05	5.20562e-06
FBgn0285950	FBtr0072406	4.02045	TRUE	4.5	1.14269	7.68817e-07	1.8858e-05	5.20562e-06
FBgn0052850	FBtr0089123	2.36113	TRUE	4.5	1.14141	7.68817e-07	1.8858e-05	5.20562e-06
FBgn0263697	FBtr0087585	3.13858	TRUE	4.5	1.13614	7.68817e-07	1.8858e-05	5.20562e-06
FBgn0030522	FBtr0100218	2.29422	TRUE	4.5	1.13307	7.68817e-07	1.8858e-05	5.20562e-06
FBgn0000166	FBtr0081665	2.49793	TRUE	4.5	1.12619	7.68817e-07	1.8858e-05	5.20562e-06
FBgn0020620	FBtr0087603	2.70171	TRUE	4.5	1.11916	7.68817e-07	1.8858e-05	5.20562e-06
FBgn0011290	FBtr0335213	2.53638	TRUE	4.5	1.11573	7.68817e-07	1.8858e-05	5.20562e-06
FBgn0262975	FBtr0306750	3.31455	TRUE	4.5	1.11508	7.68817e-07	1.8858e-05	5.20562e-06
FBgn0030703	FBtr0074166	3.28773	TRUE	4.5	1.11426	7.68817e-07	1.8858e-05	5.20562e-06
FBgn0050381	FBtr0113374	2.45052	TRUE	4.5	1.11393	7.68817e-07	1.8858e-05	5.20562e-06
FBgn0016701	FBtr0086830	3.03671	TRUE	4.5	1.1101	7.68817e-07	1.8858e-05	5.20562e-06
FBgn0030710	FBtr0074130	3.30813	TRUE	4.5	1.11006	7.68817e-07	1.8858e-05	5.20562e-06
FBgn0036107	FBtr0076270	2.72653	TRUE	4.5	1.10952	7.68817e-07	1.8858e-05	5.20562e-06
FBgn0032750	FBtr0081150	2.54487	TRUE	4.5	1.10693	7.68817e-07	1.8858e-05	5.20562e-06
FBgn0037261	FBtr0078894	3.38293	TRUE	4.5	1.1066	7.68817e-07	1.8858e-05	5.20562e-06
FBgn0029914	FBtr0300177	2.8246	TRUE	4.5	1.10638	7.68817e-07	1.8858e-05	5.20562e-06
FBgn0035235	FBtr0072827	2.78877	TRUE	4.5	1.10435	7.68817e-07	1.8858e-05	5.20562e-06
FBgn0037328	FBtr0078769	3.59189	TRUE	4.5	1.10294	7.68817e-07	1.8858e-05	5.20562e-06
FBgn0016694	FBtr0076775	2.19327	TRUE	4.5	1.10262	7.68817e-07	1.8858e-05	5.20562e-06
FBgn0283510	FBtr0339422	2.73346	TRUE	4.5	1.09879	7.68817e-07	1.8858e-05	5.20562e-06
FBgn0014455	FBtr0346181	2.47771	TRUE	4.5	1.09687	7.68817e-07	1.8858e-05	5.20562e-06
FBgn0038421	FBtr0083323	3.14784	TRUE	4.5	1.09383	7.68817e-07	1.8858e-05	5.20562e-06
FBgn0263602	FBtr0333600	3.12935	TRUE	4.5	1.09131	7.68817e-07	1.8858e-05	5.20562e-06
FBgn0086370	FBtr0083255	2.94466	TRUE	4.5	1.0894	7.68817e-07	1.8858e-05	5.20562e-06
FBgn0284222	FBtr0452121	3.19809	TRUE	4.5	1.0893	7.68817e-07	1.8858e-05	5.20562e-06
FBgn0264751	FBtr0334144	2.38276	TRUE	4.5	1.08913	7.68817e-07	1.8858e-05	5.20562e-06
FBgn0285925	FBtr0083332	2.94609	TRUE	4.5	1.08833	7.68817e-07	1.8858e-05	5.20562e-06
FBgn0032420	FBtr0080358	2.66814	TRUE	4.5	1.08224	7.68817e-07	1.8858e-05	5.20562e-06
FBgn0002962	FBtr0335019	4.24543	TRUE	4.5	1.08081	7.68817e-07	1.8858e-05	5.20562e-06
FBgn0037646	FBtr0081958	2.47115	TRUE	4.5	1.08079	7.68817e-07	1.8858e-05	5.20562e-06
FBgn0039969	FBtr0273211	1.6751	TRUE	4.5	1.07979	7.68817e-07	1.8858e-05	5.20562e-06
FBgn0030178	FBtr0290234	2.35107	TRUE	4.5	1.07846	7.68817e-07	1.8858e-05	5.20562e-06
FBgn0031600	FBtr0077460	2.44868	TRUE	4.5	1.07238	7.68817e-07	1.8858e-05	5.20562e-06
FBgn0032943	FBtr0273404	2.84823	TRUE	4.5	1.06755	7.68817e-07	1.8858e-05	5.20562e-06
FBgn0027359	FBtr0073482	2.74439	TRUE	4.5	1.06447	7.68817e-07	1.8858e-05	5.20562e-06
FBgn0038739	FBtr0334307	2.72118	TRUE	4.5	1.06293	7.68817e-07	1.8858e-05	5.20562e-06
FBgn0260392	FBtr0300662	2.64359	TRUE	4.5	1.06064	7.68817e-07	1.8858e-05	5.20562e-06
FBgn0033257	FBtr0088780	1.88429	TRUE	4.5	1.05964	7.68817e-07	1.8858e-05	5.20562e-06
FBgn0031381	FBtr0077816	3.0005	TRUE	4.5	1.05858	7.68817e-07	1.8858e-05	5.20562e-06
FBgn0030734	FBtr0074243	3.10667	TRUE	4.5	1.05443	7.68817e-07	1.8858e-05	5.20562e-06
FBgn0039098	FBtr0084434	2.64617	TRUE	4.5	1.05418	7.68817e-07	1.8858e-05	5.20562e-06
FBgn0015393	FBtr0079846	3.11202	TRUE	4.5	1.05263	7.68817e-07	1.8858e-05	5.20562e-06
FBgn0000259	FBtr0073558	2.7137	TRUE	4.5	1.05022	7.68817e-07	1.8858e-05	5.20562e-06
FBgn0013750	FBtr0087379	2.64009	TRUE	4.5	1.04977	7.68817e-07	1.8858e-05	5.20562e-06
FBgn0036144	FBtr0076190	3.20212	TRUE	4.5	1.0497	7.68817e-07	1.8858e-05	5.20562e-06
FBgn0039741	FBtr0085560	3.32881	TRUE	4.5	1.04947	7.68817e-07	1.8858e-05	5.20562e-06
FBgn0010638	FBtr0087498	2.98191	TRUE	4.5	1.04769	7.68817e-07	1.8858e-05	5.20562e-06
FBgn0034066	FBtr0087261	2.46268	TRUE	4.5	1.04734	7.68817e-07	1.8858e-05	5.20562e-06
FBgn0024230	FBtr0081288	2.7515	TRUE	4.5	1.04726	7.68817e-07	1.8858e-05	5.20562e-06
FBgn0035980	FBtr0076444	2.60391	TRUE	4.5	1.04204	7.68817e-07	1.8858e-05	5.20562e-06
FBgn0010438	FBtr0083277	2.81654	TRUE	4.5	1.03635	7.68817e-07	1.8858e-05	5.20562e-06
FBgn0001276	FBtr0088154	2.07313	TRUE	4.5	1.03447	7.68817e-07	1.8858e-05	5.20562e-06
FBgn0031435	FBtr0077693	3.28962	TRUE	4.5	1.03336	7.68817e-07	1.8858e-05	5.20562e-06
FBgn0041585	FBtr0086797	2.51723	TRUE	4.5	1.03146	7.68817e-07	1.8858e-05	5.20562e-06
FBgn0262169	FBtr0088402	3.16677	TRUE	4.5	1.03105	7.68817e-07	1.8858e-05	5.20562e-06
FBgn0004436	FBtr0306106	2.90982	TRUE	4.5	1.03037	7.68817e-07	1.8858e-05	5.20562e-06
FBgn0037777	FBtr0082205	2.23089	TRUE	4.5	1.02962	7.68817e-07	1.8858e-05	5.20562e-06
FBgn0054015	FBtr0100070	2.22811	TRUE	4.5	1.02798	7.68817e-07	1.8858e-05	5.20562e-06
FBgn0033846	FBtr0087669	3.12975	TRUE	4.5	1.02747	7.68817e-07	1.8858e-05	5.20562e-06
FBgn0025700	FBtr0079900	2.77222	TRUE	4.5	1.02509	7.68817e-07	1.8858e-05	5.20562e-06
FBgn0036998	FBtr0078198	2.66359	TRUE	4.5	1.02261	7.68817e-07	1.8858e-05	5.20562e-06
FBgn0036331	FBtr0306091	2.48008	TRUE	4.5	1.02155	7.68817e-07	1.8858e-05	5.20562e-06
FBgn0001180	FBtr0081950	3.61621	TRUE	4.5	1.02144	7.68817e-07	1.8858e-05	5.20562e-06
FBgn0261373	FBtr0343490	2.30034	TRUE	4.5	1.02062	7.68817e-07	1.8858e-05	5.20562e-06
FBgn0284249	FBtr0086113	2.81919	TRUE	4.5	1.02013	7.68817e-07	1.8858e-05	5.20562e-06
FBgn0051126	FBtr0084663	2.27272	TRUE	4.5	1.01873	7.68817e-07	1.8858e-05	5.20562e-06
FBgn0263278	FBtr0079257	2.98715	TRUE	4.5	1.01872	7.68817e-07	1.8858e-05	5.20562e-06
FBgn0023530	FBtr0070283	2.93576	TRUE	4.5	1.01777	7.68817e-07	1.8858e-05	5.20562e-06
FBgn0083167	FBtr0071449	2.76047	TRUE	4.5	1.01547	7.68817e-07	1.8858e-05	5.20562e-06
FBgn0265003	FBtr0335512	3.33166	TRUE	4.5	1.01441	7.68817e-07	1.8858e-05	5.20562e-06
FBgn0267376	FBtr0082292	2.75051	TRUE	4.5	1.01405	7.68817e-07	1.8858e-05	5.20562e-06
FBgn0032849	FBtr0081339	2.46059	TRUE	4.5	1.0136	7.68817e-07	1.8858e-05	5.20562e-06
FBgn0025469	FBtr0088824	2.32207	TRUE	4.5	1.01335	7.68817e-07	1.8858e-05	5.20562e-06
FBgn0032783	FBtr0081208	3.45807	TRUE	4.5	1.01085	7.68817e-07	1.8858e-05	5.20562e-06
FBgn0031059	FBtr0074753	2.93056	TRUE	4.5	1.00784	7.68817e-07	1.8858e-05	5.20562e-06
FBgn0028360	FBtr0070950	3.49969	TRUE	4.5	1.00741	7.68817e-07	1.8858e-05	5.20562e-06
FBgn0026060	FBtr0070884	3.21102	TRUE	4.5	1.00608	7.68817e-07	1.8858e-05	5.20562e-06
FBgn0036695	FBtr0075279	2.43475	TRUE	4.5	1.00562	7.68817e-07	1.8858e-05	5.20562e-06
FBgn0020622	FBtr0331208	3.16119	TRUE	4.5	1.00515	7.68817e-07	1.8858e-05	5.20562e-06
FBgn0032949	FBtr0085896	3.49322	TRUE	4.5	1.00501	7.68817e-07	1.8858e-05	5.20562e-06
FBgn0053199	FBtr0088688	3.09305	TRUE	4.5	1.00404	7.68817e-07	1.8858e-05	5.20562e-06
FBgn0261722	FBtr0075542	2.69615	TRUE	4.5	1.00332	7.68817e-07	1.8858e-05	5.20562e-06
FBgn0011787	FBtr0076511	3.02432	TRUE	4.5	0.999286	7.68817e-07	1.8858e-05	5.20562e-06
FBgn0031284	FBtr0078039	2.47234	TRUE	4.5	0.999157	7.68817e-07	1.8858e-05	5.20562e-06
FBgn0032921	FBtr0081469	2.0548	TRUE	4.5	0.997429	7.68817e-07	1.8858e-05	5.20562e-06
FBgn0034025	FBtr0087332	3.18015	TRUE	4.5	0.995022	7.68817e-07	1.8858e-05	5.20562e-06
FBgn0031769	FBtr0343121	3.26521	TRUE	4.5	0.995	7.68817e-07	1.8858e-05	5.20562e-06
FBgn0028648	FBtr0076891	2.12334	TRUE	4.5	0.994678	7.68817e-07	1.8858e-05	5.20562e-06
FBgn0034925	FBtr0072220	3.23903	TRUE	4.5	0.992071	7.68817e-07	1.8858e-05	5.20562e-06
FBgn0051866	FBtr0080287	2.47398	TRUE	4.5	0.99108	7.68817e-07	1.8858e-05	5.20562e-06
FBgn0030196	FBtr0071465	2.81502	TRUE	4.5	0.990194	7.68817e-07	1.8858e-05	5.20562e-06
FBgn0004394	FBtr0080393	1.96139	TRUE	4.5	0.988812	7.68817e-07	1.8858e-05	5.20562e-06
FBgn0010452	FBtr0075890	2.23242	TRUE	4.5	0.988104	7.68817e-07	1.8858e-05	5.20562e-06
FBgn0051450	FBtr0081897	2.97087	TRUE	4.5	0.987344	7.68817e-07	1.8858e-05	5.20562e-06
FBgn0020622	FBtr0331205	3.40811	TRUE	4.5	0.986513	7.68817e-07	1.8858e-05	5.20562e-06
FBgn0043364	FBtr0078083	2.89708	TRUE	4.5	0.986314	7.68817e-07	1.8858e-05	5.20562e-06
FBgn0034703	FBtr0071787	2.67782	TRUE	4.5	0.983888	7.68817e-07	1.8858e-05	5.20562e-06
FBgn0038769	FBtr0083839	2.69674	TRUE	4.5	0.981005	7.68817e-07	1.8858e-05	5.20562e-06
FBgn0030973	FBtr0074647	3.44853	TRUE	4.5	0.980389	7.68817e-07	1.8858e-05	5.20562e-06
FBgn0051961	FBtr0077484	2.59777	TRUE	4.5	0.980031	7.68817e-07	1.8858e-05	5.20562e-06
FBgn0052579	FBtr0074225	2.83447	TRUE	4.5	0.980031	7.68817e-07	1.8858e-05	5.20562e-06
FBgn0035266	FBtr0072767	3.43556	TRUE	4.5	0.978387	7.68817e-07	1.8858e-05	5.20562e-06
FBgn0260860	FBtr0085570	2.24217	TRUE	4.5	0.975848	7.68817e-07	1.8858e-05	5.20562e-06
FBgn0261067	FBtr0071628	2.45964	TRUE	4.5	0.974608	7.68817e-07	1.8858e-05	5.20562e-06
FBgn0045866	FBtr0084758	3.10478	TRUE	4.5	0.972914	7.68817e-07	1.8858e-05	5.20562e-06
FBgn0026250	FBtr0343927	2.7665	TRUE	4.5	0.969479	7.68817e-07	1.8858e-05	5.20562e-06
FBgn0265193	FBtr0339096	2.64416	TRUE	4.5	0.967762	7.68817e-07	1.8858e-05	5.20562e-06
FBgn0038755	FBtr0083846	2.32946	TRUE	4.5	0.9676	7.68817e-07	1.8858e-05	5.20562e-06
FBgn0013750	FBtr0087378	3.49116	TRUE	4.5	0.965257	7.68817e-07	1.8858e-05	5.20562e-06
FBgn0034535	FBtr0086231	2.75941	TRUE	4.5	0.962898	7.68817e-07	1.8858e-05	5.20562e-06
FBgn0015776	FBtr0332370	3.61623	TRUE	4.5	0.962713	7.68817e-07	1.8858e-05	5.20562e-06
FBgn0034398	FBtr0086629	2.95752	TRUE	4.5	0.962618	7.68817e-07	1.8858e-05	5.20562e-06
FBgn0025381	FBtr0070259	3.23145	TRUE	4.5	0.962157	7.68817e-07	1.8858e-05	5.20562e-06
FBgn0029094	FBtr0074947	2.48915	TRUE	4.5	0.961475	7.68817e-07	1.8858e-05	5.20562e-06
FBgn0029709	FBtr0070675	2.73662	TRUE	4.5	0.960479	7.68817e-07	1.8858e-05	5.20562e-06
FBgn0011300	FBtr0088659	3.4202	TRUE	4.5	0.95963	7.68817e-07	1.8858e-05	5.20562e-06
FBgn0028697	FBtr0308333	3.39568	TRUE	4.5	0.955385	7.68817e-07	1.8858e-05	5.20562e-06
FBgn0029161	FBtr0079217	2.88635	TRUE	4.5	0.952297	7.68817e-07	1.8858e-05	5.20562e-06
FBgn0015569	FBtr0289953	2.60806	TRUE	4.5	0.950384	7.68817e-07	1.8858e-05	5.20562e-06
FBgn0267728	FBtr0088027	2.29656	TRUE	4.5	0.946967	7.68817e-07	1.8858e-05	5.20562e-06
FBgn0013531	FBtr0079544	2.45168	TRUE	4.5	0.945951	7.68817e-07	1.8858e-05	5.20562e-06
FBgn0265784	FBtr0074557	2.87818	TRUE	4.5	0.943986	7.68817e-07	1.8858e-05	5.20562e-06
FBgn0036853	FBtr0346548	1.90467	TRUE	4.5	0.942281	7.68817e-07	1.8858e-05	5.20562e-06
FBgn0037634	FBtr0081919	2.47048	TRUE	4.5	0.941703	7.68817e-07	1.8858e-05	5.20562e-06
FBgn0033639	FBtr0113069	3.04321	TRUE	4.5	0.94158	7.68817e-07	1.8858e-05	5.20562e-06
FBgn0033624	FBtr0088155	2.82216	TRUE	4.5	0.937276	7.68817e-07	1.8858e-05	5.20562e-06
FBgn0031309	FBtr0077985	2.56299	TRUE	4.5	0.93259	7.68817e-07	1.8858e-05	5.20562e-06
FBgn0032790	FBtr0081285	2.24632	TRUE	4.5	0.931915	7.68817e-07	1.8858e-05	5.20562e-06
FBgn0001977	FBtr0080725	3.19849	TRUE	4.5	0.930153	7.68817e-07	1.8858e-05	5.20562e-06
FBgn0017551	FBtr0079342	3.02535	TRUE	4.5	0.930054	7.68817e-07	1.8858e-05	5.20562e-06
FBgn0034126	FBtr0087157	2.13835	TRUE	4.5	0.929829	7.68817e-07	1.8858e-05	5.20562e-06
FBgn0037235	FBtr0078909	2.5654	TRUE	4.5	0.929553	7.68817e-07	1.8858e-05	5.20562e-06
FBgn0032858	FBtr0081367	2.7845	TRUE	4.5	0.929062	7.68817e-07	1.8858e-05	5.20562e-06
FBgn0003114	FBtr0086306	2.84457	TRUE	4.5	0.926385	7.68817e-07	1.8858e-05	5.20562e-06
FBgn0011327	FBtr0076472	2.79083	TRUE	4.5	0.9252	7.68817e-07	1.8858e-05	5.20562e-06
FBgn0036366	FBtr0075825	2.71305	TRUE	4.5	0.923582	7.68817e-07	1.8858e-05	5.20562e-06
FBgn0029913	FBtr0071041	2.48291	TRUE	4.5	0.920962	7.68817e-07	1.8858e-05	5.20562e-06
FBgn0039417	FBtr0307342	2.80906	TRUE	4.5	0.920412	7.68817e-07	1.8858e-05	5.20562e-06
FBgn0030964	FBtr0074640	2.76968	TRUE	4.5	0.919384	7.68817e-07	1.8858e-05	5.20562e-06
FBgn0035435	FBtr0300753	2.34363	TRUE	4.5	0.918637	7.68817e-07	1.8858e-05	5.20562e-06
FBgn0024841	FBtr0085458	2.74954	TRUE	4.5	0.917434	7.68817e-07	1.8858e-05	5.20562e-06
FBgn0003206	FBtr0073212	2.97514	TRUE	4.5	0.91633	7.68817e-07	1.8858e-05	5.20562e-06
FBgn0033341	FBtr0088684	2.40058	TRUE	4.5	0.915011	7.68817e-07	1.8858e-05	5.20562e-06
FBgn0032162	FBtr0331632	2.45787	TRUE	4.5	0.911325	7.68817e-07	1.8858e-05	5.20562e-06
FBgn0030610	FBtr0073966	2.21929	TRUE	4.5	0.911064	7.68817e-07	1.8858e-05	5.20562e-06
FBgn0061198	FBtr0072194	2.50024	TRUE	4.5	0.909027	7.68817e-07	1.8858e-05	5.20562e-06
FBgn0030028	FBtr0071179	2.96337	TRUE	4.5	0.907777	7.68817e-07	1.8858e-05	5.20562e-06
FBgn0020224	FBtr0076614	3.46187	TRUE	4.5	0.907073	7.68817e-07	1.8858e-05	5.20562e-06
FBgn0046301	FBtr0078448	2.50873	TRUE	4.5	0.90584	7.68817e-07	1.8858e-05	5.20562e-06
FBgn0032236	FBtr0080007	2.86893	TRUE	4.5	0.902586	7.68817e-07	1.8858e-05	5.20562e-06
FBgn0015000	FBtr0078991	2.9483	TRUE	4.5	0.901975	7.68817e-07	1.8858e-05	5.20562e-06
FBgn0033235	FBtr0088882	3.3321	TRUE	4.5	0.901294	7.68817e-07	1.8858e-05	5.20562e-06
FBgn0040308	FBtr0072982	2.60346	TRUE	4.5	0.900067	7.68817e-07	1.8858e-05	5.20562e-06
FBgn0086898	FBtr0088249	2.61263	TRUE	4.5	0.899926	7.68817e-07	1.8858e-05	5.20562e-06
FBgn0010317	FBtr0073127	2.62489	TRUE	4.5	0.89971	7.68817e-07	1.8858e-05	5.20562e-06
FBgn0039153	FBtr0084584	2.71005	TRUE	4.5	0.898924	7.68817e-07	1.8858e-05	5.20562e-06
FBgn0038387	FBtr0083203	2.69728	TRUE	4.5	0.898608	7.68817e-07	1.8858e-05	5.20562e-06
FBgn0034626	FBtr0071609	2.54105	TRUE	4.5	0.898472	7.68817e-07	1.8858e-05	5.20562e-06
FBgn0010607	FBtr0079050	2.58742	TRUE	4.5	0.897447	7.68817e-07	1.8858e-05	5.20562e-06
FBgn0063670	FBtr0333872	2.54218	TRUE	4.5	0.895589	7.68817e-07	1.8858e-05	5.20562e-06
FBgn0030704	FBtr0074117	2.90144	TRUE	4.5	0.895361	7.68817e-07	1.8858e-05	5.20562e-06
FBgn0011361	FBtr0072677	2.62278	TRUE	4.5	0.89523	7.68817e-07	1.8858e-05	5.20562e-06
FBgn0034743	FBtr0071855	4.00269	TRUE	4.5	0.894286	7.68817e-07	1.8858e-05	5.20562e-06
FBgn0026257	FBtr0084559	3.31588	TRUE	4.5	0.892909	7.68817e-07	1.8858e-05	5.20562e-06
FBgn0001941	FBtr0079179	3.15137	TRUE	4.5	0.891933	7.68817e-07	1.8858e-05	5.20562e-06
FBgn0067102	FBtr0071755	3.26387	TRUE	4.5	0.88996	7.68817e-07	1.8858e-05	5.20562e-06
FBgn0035461	FBtr0073185	2.66698	TRUE	4.5	0.889076	7.68817e-07	1.8858e-05	5.20562e-06
FBgn0031312	FBtr0077961	2.95982	TRUE	4.5	0.888331	7.68817e-07	1.8858e-05	5.20562e-06
FBgn0033998	FBtr0087402	2.84174	TRUE	4.5	0.886987	7.68817e-07	1.8858e-05	5.20562e-06
FBgn0039132	FBtr0084496	3.08396	TRUE	4.5	0.886454	7.68817e-07	1.8858e-05	5.20562e-06
FBgn0267975	FBtr0083745	2.83981	TRUE	4.5	0.885573	7.68817e-07	1.8858e-05	5.20562e-06
FBgn0038524	FBtr0083462	3.00437	TRUE	4.5	0.883277	7.68817e-07	1.8858e-05	5.20562e-06
FBgn0031247	FBtr0078130	2.28011	TRUE	4.5	0.881867	7.68817e-07	1.8858e-05	5.20562e-06
FBgn0034958	FBtr0072196	1.95673	TRUE	4.5	0.880852	7.68817e-07	1.8858e-05	5.20562e-06
FBgn0036990	FBtr0078227	2.55616	TRUE	4.5	0.873639	7.68817e-07	1.8858e-05	5.20562e-06
FBgn0085442	FBtr0301851	2.55972	TRUE	4.5	0.869812	7.68817e-07	1.8858e-05	5.20562e-06
FBgn0039869	FBtr0085836	2.80661	TRUE	4.5	0.869078	7.68817e-07	1.8858e-05	5.20562e-06
FBgn0263602	FBtr0075498	2.9462	TRUE	4.5	0.86767	7.68817e-07	1.8858e-05	5.20562e-06
FBgn0026402	FBtr0087058	2.7318	TRUE	4.5	0.866595	7.68817e-07	1.8858e-05	5.20562e-06
FBgn0026737	FBtr0112926	2.69464	TRUE	4.5	0.862876	7.68817e-07	1.8858e-05	5.20562e-06
FBgn0035848	FBtr0076690	2.49538	TRUE	4.5	0.862004	7.68817e-07	1.8858e-05	5.20562e-06
FBgn0061515	FBtr0075782	3.35207	TRUE	4.5	0.861958	7.68817e-07	1.8858e-05	5.20562e-06
FBgn0037664	FBtr0081973	2.35968	TRUE	4.5	0.861166	7.68817e-07	1.8858e-05	5.20562e-06
FBgn0267330	FBtr0080021	2.87137	TRUE	4.5	0.860506	7.68817e-07	1.8858e-05	5.20562e-06
FBgn0031987	FBtr0079642	2.59012	TRUE	4.5	0.858394	7.68817e-07	1.8858e-05	5.20562e-06
FBgn0054001	FBtr0300947	2.02661	TRUE	4.5	0.858294	7.68817e-07	1.8858e-05	5.20562e-06
FBgn0037609	FBtr0081953	2.67124	TRUE	4.5	0.857558	7.68817e-07	1.8858e-05	5.20562e-06
FBgn0051005	FBtr0085769	2.71782	TRUE	4.5	0.857334	7.68817e-07	1.8858e-05	5.20562e-06
FBgn0016970	FBtr0088505	2.66906	TRUE	4.5	0.856927	7.68817e-07	1.8858e-05	5.20562e-06
FBgn0039602	FBtr0085326	2.75726	TRUE	4.5	0.856646	7.68817e-07	1.8858e-05	5.20562e-06
FBgn0011217	FBtr0336876	3.36452	TRUE	4.5	0.855812	7.68817e-07	1.8858e-05	5.20562e-06
FBgn0034081	FBtr0344527	2.62729	TRUE	4.5	0.854956	7.68817e-07	1.8858e-05	5.20562e-06
FBgn0035169	FBtr0072587	3.01115	TRUE	4.5	0.854487	7.68817e-07	1.8858e-05	5.20562e-06
FBgn0038446	FBtr0083303	2.46543	TRUE	4.5	0.85414	7.68817e-07	1.8858e-05	5.20562e-06
FBgn0039251	FBtr0337011	2.88177	TRUE	4.5	0.851692	7.68817e-07	1.8858e-05	5.20562e-06
FBgn0261933	FBtr0075952	2.80136	TRUE	4.5	0.850785	7.68817e-07	1.8858e-05	5.20562e-06
FBgn0037084	FBtr0088103	2.91073	TRUE	4.5	0.850573	7.68817e-07	1.8858e-05	5.20562e-06
FBgn0032400	FBtr0080306	3.52165	TRUE	4.5	0.848371	7.68817e-07	1.8858e-05	5.20562e-06
FBgn0032259	FBtr0304137	2.702	TRUE	4.5	0.848081	7.68817e-07	1.8858e-05	5.20562e-06
FBgn0001128	FBtr0079146	3.63696	TRUE	4.5	0.841886	7.68817e-07	1.8858e-05	5.20562e-06
FBgn0032921	FBtr0343869	2.55263	TRUE	4.5	0.841565	7.68817e-07	1.8858e-05	5.20562e-06
FBgn0030391	FBtr0073669	2.56647	TRUE	4.5	0.841327	7.68817e-07	1.8858e-05	5.20562e-06
FBgn0051249	FBtr0083483	2.79928	TRUE	4.5	0.841261	7.68817e-07	1.8858e-05	5.20562e-06
FBgn0036853	FBtr0333224	2.78355	TRUE	4.5	0.838963	7.68817e-07	1.8858e-05	5.20562e-06
FBgn0031379	FBtr0077815	2.84198	TRUE	4.5	0.836671	7.68817e-07	1.8858e-05	5.20562e-06
FBgn0035148	FBtr0072559	2.80605	TRUE	4.5	0.835754	7.68817e-07	1.8858e-05	5.20562e-06
FBgn0069242	FBtr0082098	2.80107	TRUE	4.5	0.835527	7.68817e-07	1.8858e-05	5.20562e-06
FBgn0031036	FBtr0074768	2.66164	TRUE	4.5	0.835039	7.68817e-07	1.8858e-05	5.20562e-06
FBgn0039465	FBtr0085082	2.53552	TRUE	4.5	0.833329	7.68817e-07	1.8858e-05	5.20562e-06
FBgn0011509	FBtr0333891	2.60597	TRUE	4.5	0.830635	7.68817e-07	1.8858e-05	5.20562e-06
FBgn0039188	FBtr0084629	2.81221	TRUE	4.5	0.829364	7.68817e-07	1.8858e-05	5.20562e-06
FBgn0035087	FBtr0308687	3.16823	TRUE	4.5	0.829232	7.68817e-07	1.8858e-05	5.20562e-06
FBgn0087040	FBtr0076393	4.11873	TRUE	4.5	0.823714	7.68817e-07	1.8858e-05	5.20562e-06
FBgn0000330	FBtr0071033	2.66741	TRUE	4.5	0.822934	7.68817e-07	1.8858e-05	5.20562e-06
FBgn0259243	FBtr0299891	3.1069	TRUE	4.5	0.822888	7.68817e-07	1.8858e-05	5.20562e-06
FBgn0261445	FBtr0076938	3.43243	TRUE	4.5	0.821595	7.68817e-07	1.8858e-05	5.20562e-06
FBgn0039099	FBtr0084435	2.46878	TRUE	4.5	0.821469	7.68817e-07	1.8858e-05	5.20562e-06
FBgn0034729	FBtr0071841	2.60408	TRUE	4.5	0.821364	7.68817e-07	1.8858e-05	5.20562e-06
FBgn0001120	FBtr0075697	3.51106	TRUE	4.5	0.817705	7.68817e-07	1.8858e-05	5.20562e-06
FBgn0038453	FBtr0333728	2.39838	TRUE	4.5	0.814766	7.68817e-07	1.8858e-05	5.20562e-06
FBgn0260859	FBtr0089879	2.73056	TRUE	4.5	0.813404	7.68817e-07	1.8858e-05	5.20562e-06
FBgn0260659	FBtr0301101	3.00204	TRUE	4.5	0.813336	7.68817e-07	1.8858e-05	5.20562e-06
FBgn0261387	FBtr0111277	2.47144	TRUE	4.5	0.810522	7.68817e-07	1.8858e-05	5.20562e-06
FBgn0037802	FBtr0305358	2.64753	TRUE	4.5	0.808691	7.68817e-07	1.8858e-05	5.20562e-06
FBgn0047199	FBtr0082864	2.75286	TRUE	4.5	0.807849	7.68817e-07	1.8858e-05	5.20562e-06
FBgn0015521	FBtr0335131	2.77203	TRUE	4.5	0.80758	7.68817e-07	1.8858e-05	5.20562e-06
FBgn0036893	FBtr0074946	2.60315	TRUE	4.5	0.806893	7.68817e-07	1.8858e-05	5.20562e-06
FBgn0082598	FBtr0076848	3.35262	TRUE	4.5	0.806561	7.68817e-07	1.8858e-05	5.20562e-06
FBgn0036999	FBtr0078200	2.63508	TRUE	4.5	0.800026	7.68817e-07	1.8858e-05	5.20562e-06
FBgn0016041	FBtr0333748	3.07973	TRUE	4.5	0.799178	7.68817e-07	1.8858e-05	5.20562e-06
FBgn0039757	FBtr0089422	3.92231	TRUE	4.5	0.796761	7.68817e-07	1.8858e-05	5.20562e-06
FBgn0031834	FBtr0079330	2.73257	TRUE	4.5	0.795718	7.68817e-07	1.8858e-05	5.20562e-06
FBgn0040070	FBtr0079840	3.3011	TRUE	4.5	0.794599	7.68817e-07	1.8858e-05	5.20562e-06
FBgn0000384	FBtr0111126	3.48688	TRUE	4.5	0.793433	7.68817e-07	1.8858e-05	5.20562e-06
FBgn0040477	FBtr0087667	2.64634	TRUE	4.5	0.792934	7.68817e-07	1.8858e-05	5.20562e-06
FBgn0015298	FBtr0076879	2.49817	TRUE	4.5	0.792072	7.68817e-07	1.8858e-05	5.20562e-06
FBgn0032052	FBtr0079682	3.1425	TRUE	4.5	0.791189	7.68817e-07	1.8858e-05	5.20562e-06
FBgn0011761	FBtr0070749	4.53818	TRUE	4.5	0.788526	7.68817e-07	1.8858e-05	5.20562e-06
FBgn0025830	FBtr0087036	2.69728	TRUE	4.5	0.788063	7.68817e-07	1.8858e-05	5.20562e-06
FBgn0033990	FBtr0087421	2.45022	TRUE	4.5	0.787642	7.68817e-07	1.8858e-05	5.20562e-06
FBgn0004837	FBtr0080700	2.56708	TRUE	4.5	0.787405	7.68817e-07	1.8858e-05	5.20562e-06
FBgn0050022	FBtr0289990	2.35568	TRUE	4.5	0.786012	7.68817e-07	1.8858e-05	5.20562e-06
FBgn0032421	FBtr0080342	2.40166	TRUE	4.5	0.785633	7.68817e-07	1.8858e-05	5.20562e-06
FBgn0038099	FBtr0300278	3.47949	TRUE	4.5	0.783595	7.68817e-07	1.8858e-05	5.20562e-06
FBgn0086687	FBtr0082630	3.28062	TRUE	4.5	0.781848	7.68817e-07	1.8858e-05	5.20562e-06
FBgn0040339	FBtr0070165	3.26228	TRUE	4.5	0.781819	7.68817e-07	1.8858e-05	5.20562e-06
FBgn0263987	FBtr0070795	2.92907	TRUE	4.5	0.78126	7.68817e-07	1.8858e-05	5.20562e-06
FBgn0025820	FBtr0332876	2.28171	TRUE	4.5	0.780954	7.68817e-07	1.8858e-05	5.20562e-06
FBgn0027657	FBtr0083247	3.36555	TRUE	4.5	0.780524	7.68817e-07	1.8858e-05	5.20562e-06
FBgn0262511	FBtr0087175	2.85886	TRUE	4.5	0.779302	7.68817e-07	1.8858e-05	5.20562e-06
FBgn0263027	FBtr0306926	2.37208	TRUE	4.5	0.778996	7.68817e-07	1.8858e-05	5.20562e-06
FBgn0023527	FBtr0070398	3.21486	TRUE	4.5	0.778987	7.68817e-07	1.8858e-05	5.20562e-06
FBgn0265177	FBtr0339085	2.3428	TRUE	4.5	0.778362	7.68817e-07	1.8858e-05	5.20562e-06
FBgn0264979	FBtr0077751	3.10257	TRUE	4.5	0.777638	7.68817e-07	1.8858e-05	5.20562e-06
FBgn0039561	FBtr0085266	3.03797	TRUE	4.5	0.775925	7.68817e-07	1.8858e-05	5.20562e-06
FBgn0026879	FBtr0070159	3.00555	TRUE	4.5	0.775906	7.68817e-07	1.8858e-05	5.20562e-06
FBgn0033979	FBtr0339984	2.55244	TRUE	4.5	0.774977	7.68817e-07	1.8858e-05	5.20562e-06
FBgn0031403	FBtr0113015	2.1813	TRUE	4.5	0.77447	7.68817e-07	1.8858e-05	5.20562e-06
FBgn0026084	FBtr0070639	3.54443	TRUE	4.5	0.773389	7.68817e-07	1.8858e-05	5.20562e-06
FBgn0040080	FBtr0085189	3.24286	TRUE	4.5	0.773366	7.68817e-07	1.8858e-05	5.20562e-06
FBgn0267861	FBtr0113829	2.70366	TRUE	4.5	0.773089	7.68817e-07	1.8858e-05	5.20562e-06
FBgn0260747	FBtr0074387	3.15625	TRUE	4.5	0.772702	7.68817e-07	1.8858e-05	5.20562e-06
FBgn0016041	FBtr0071073	3.37667	TRUE	4.5	0.772106	7.68817e-07	1.8858e-05	5.20562e-06
FBgn0031676	FBtr0079009	2.57028	TRUE	4.5	0.770582	7.68817e-07	1.8858e-05	5.20562e-06
FBgn0031651	FBtr0079058	2.56671	TRUE	4.5	0.768069	7.68817e-07	1.8858e-05	5.20562e-06
FBgn0010431	FBtr0076613	3.77278	TRUE	4.5	0.766839	7.68817e-07	1.8858e-05	5.20562e-06
FBgn0037262	FBtr0078857	2.77778	TRUE	4.5	0.763779	7.68817e-07	1.8858e-05	5.20562e-06
FBgn0036815	FBtr0075056	3.17935	TRUE	4.5	0.76262	7.68817e-07	1.8858e-05	5.20562e-06
FBgn0050147	FBtr0086255	2.23206	TRUE	4.5	0.762008	7.68817e-07	1.8858e-05	5.20562e-06
FBgn0052576	FBtr0100556	2.21216	TRUE	4.5	0.760571	7.68817e-07	1.8858e-05	5.20562e-06
FBgn0031657	FBtr0078994	2.64583	TRUE	4.5	0.760552	7.68817e-07	1.8858e-05	5.20562e-06
FBgn0030060	FBtr0071281	2.91244	TRUE	4.5	0.757402	7.68817e-07	1.8858e-05	5.20562e-06
FBgn0036906	FBtr0074928	2.41148	TRUE	4.5	0.757391	7.68817e-07	1.8858e-05	5.20562e-06
FBgn0033699	FBtr0088007	3.8937	TRUE	4.5	0.75624	7.68817e-07	1.8858e-05	5.20562e-06
FBgn0032979	FBtr0085964	3.03205	TRUE	4.5	0.754996	7.68817e-07	1.8858e-05	5.20562e-06
FBgn0038989	FBtr0084266	3.28411	TRUE	4.5	0.754393	7.68817e-07	1.8858e-05	5.20562e-06
FBgn0032197	FBtr0079954	3.31856	TRUE	4.5	0.754113	7.68817e-07	1.8858e-05	5.20562e-06
FBgn0010808	FBtr0085745	2.98913	TRUE	4.5	0.753494	7.68817e-07	1.8858e-05	5.20562e-06
FBgn0037008	FBtr0078215	2.55288	TRUE	4.5	0.750556	7.68817e-07	1.8858e-05	5.20562e-06
FBgn0038039	FBtr0082584	2.80881	TRUE	4.5	0.749506	7.68817e-07	1.8858e-05	5.20562e-06
FBgn0034763	FBtr0071868	3.47964	TRUE	4.5	0.749472	7.68817e-07	1.8858e-05	5.20562e-06
FBgn0051360	FBtr0083480	2.29566	TRUE	4.5	0.748191	7.68817e-07	1.8858e-05	5.20562e-06
FBgn0024330	FBtr0339719	2.4763	TRUE	4.5	0.746284	7.68817e-07	1.8858e-05	5.20562e-06
FBgn0264291	FBtr0083408	2.77283	TRUE	4.5	0.745999	7.68817e-07	1.8858e-05	5.20562e-06
FBgn0010520	FBtr0079874	2.54674	TRUE	4.5	0.745242	7.68817e-07	1.8858e-05	5.20562e-06
FBgn0034921	FBtr0072223	2.68842	TRUE	4.5	0.744239	7.68817e-07	1.8858e-05	5.20562e-06
FBgn0038683	FBtr0335020	3.32023	TRUE	4.5	0.743915	7.68817e-07	1.8858e-05	5.20562e-06
FBgn0039459	FBtr0085061	2.85633	TRUE	4.5	0.743312	7.68817e-07	1.8858e-05	5.20562e-06
FBgn0030039	FBtr0071245	2.49968	TRUE	4.5	0.741902	7.68817e-07	1.8858e-05	5.20562e-06
FBgn0031529	FBtr0332407	2.508	TRUE	4.5	0.741143	7.68817e-07	1.8858e-05	5.20562e-06
FBgn0086445	FBtr0081156	2.68295	TRUE	4.5	0.741122	7.68817e-07	1.8858e-05	5.20562e-06
FBgn0005278	FBtr0089433	3.60086	TRUE	4.5	0.738772	7.68817e-07	1.8858e-05	5.20562e-06
FBgn0053303	FBtr0080052	2.85674	TRUE	4.5	0.73514	7.68817e-07	1.8858e-05	5.20562e-06
FBgn0033902	FBtr0339964	3.6261	TRUE	4.5	0.734222	7.68817e-07	1.8858e-05	5.20562e-06
FBgn0033995	FBtr0087404	2.64989	TRUE	4.5	0.733128	7.68817e-07	1.8858e-05	5.20562e-06
FBgn0260959	FBtr0301431	3.01389	TRUE	4.5	0.73293	7.68817e-07	1.8858e-05	5.20562e-06
FBgn0052425	FBtr0078202	2.99577	TRUE	4.5	0.732304	7.68817e-07	1.8858e-05	5.20562e-06
FBgn0046214	FBtr0084776	3.05274	TRUE	4.5	0.7318	7.68817e-07	1.8858e-05	5.20562e-06
FBgn0267972	FBtr0077813	2.54231	TRUE	4.5	0.730214	7.68817e-07	1.8858e-05	5.20562e-06
FBgn0035473	FBtr0073176	3.16402	TRUE	4.5	0.727548	7.68817e-07	1.8858e-05	5.20562e-06
FBgn0030700	FBtr0074105	2.31942	TRUE	4.5	0.726603	7.68817e-07	1.8858e-05	5.20562e-06
FBgn0029860	FBtr0100319	2.40626	TRUE	4.5	0.726021	7.68817e-07	1.8858e-05	5.20562e-06
FBgn0039942	FBtr0309316	3.18101	TRUE	4.5	0.7238	7.68817e-07	1.8858e-05	5.20562e-06
FBgn0053229	FBtr0072499	3.4312	TRUE	4.5	0.723358	7.68817e-07	1.8858e-05	5.20562e-06
FBgn0050382	FBtr0088894	3.59708	TRUE	4.5	0.721603	7.68817e-07	1.8858e-05	5.20562e-06
FBgn0033948	FBtr0087500	2.49655	TRUE	4.5	0.71756	7.68817e-07	1.8858e-05	5.20562e-06
FBgn0005671	FBtr0082670	3.84413	TRUE	4.5	0.716652	7.68817e-07	1.8858e-05	5.20562e-06
FBgn0037244	FBtr0290222	3.17854	TRUE	4.5	0.71621	7.68817e-07	1.8858e-05	5.20562e-06
FBgn0037890	FBtr0082360	3.07597	TRUE	4.5	0.715455	7.68817e-07	1.8858e-05	5.20562e-06
FBgn0038307	FBtr0083053	2.79989	TRUE	4.5	0.714877	7.68817e-07	1.8858e-05	5.20562e-06
FBgn0000055	FBtr0100589	3.35964	TRUE	4.5	0.713886	7.68817e-07	1.8858e-05	5.20562e-06
FBgn0037779	FBtr0082204	2.24419	TRUE	4.5	0.713072	7.68817e-07	1.8858e-05	5.20562e-06
FBgn0029594	FBtr0331384	2.72958	TRUE	4.5	0.712869	7.68817e-07	1.8858e-05	5.20562e-06
FBgn0030239	FBtr0073379	3.03942	TRUE	4.5	0.712839	7.68817e-07	1.8858e-05	5.20562e-06
FBgn0031069	FBtr0074795	3.36186	TRUE	4.5	0.711583	7.68817e-07	1.8858e-05	5.20562e-06
FBgn0030092	FBtr0071348	2.31895	TRUE	4.5	0.70998	7.68817e-07	1.8858e-05	5.20562e-06
FBgn0029905	FBtr0070974	3.02478	TRUE	4.5	0.708892	7.68817e-07	1.8858e-05	5.20562e-06
FBgn0000063	FBtr0083478	2.78972	TRUE	4.5	0.707153	7.68817e-07	1.8858e-05	5.20562e-06
FBgn0024889	FBtr0074881	3.37034	TRUE	4.5	0.707133	7.68817e-07	1.8858e-05	5.20562e-06
FBgn0033177	FBtr0088999	3.05777	TRUE	4.5	0.706967	7.68817e-07	1.8858e-05	5.20562e-06
FBgn0001124	FBtr0087232	3.29635	TRUE	4.5	0.706471	7.68817e-07	1.8858e-05	5.20562e-06
FBgn0038251	FBtr0082967	3.14352	TRUE	4.5	0.703513	7.68817e-07	1.8858e-05	5.20562e-06
FBgn0039642	FBtr0085411	2.5238	TRUE	4.5	0.703499	7.68817e-07	1.8858e-05	5.20562e-06
FBgn0035209	FBtr0072678	2.94913	TRUE	4.5	0.703204	7.68817e-07	1.8858e-05	5.20562e-06
FBgn0035713	FBtr0345025	3.36034	TRUE	4.5	0.70201	7.68817e-07	1.8858e-05	5.20562e-06
FBgn0002973	FBtr0079821	3.39591	TRUE	4.5	0.701886	7.68817e-07	1.8858e-05	5.20562e-06
FBgn0051363	FBtr0082452	3.71371	TRUE	4.5	0.701503	7.68817e-07	1.8858e-05	5.20562e-06
FBgn0037312	FBtr0078807	2.53325	TRUE	4.5	0.700528	7.68817e-07	1.8858e-05	5.20562e-06
FBgn0051357	FBtr0084735	2.44146	TRUE	4.5	0.70041	7.68817e-07	1.8858e-05	5.20562e-06
FBgn0033737	FBtr0087952	3.45576	TRUE	4.5	0.697443	7.68817e-07	1.8858e-05	5.20562e-06
FBgn0031711	FBtr0343257	2.77696	TRUE	4.5	0.696691	7.68817e-07	1.8858e-05	5.20562e-06
FBgn0283536	FBtr0083804	3.37025	TRUE	4.5	0.696538	7.68817e-07	1.8858e-05	5.20562e-06
FBgn0035475	FBtr0073173	2.82672	TRUE	4.5	0.696222	7.68817e-07	1.8858e-05	5.20562e-06
FBgn0036405	FBtr0075774	2.7649	TRUE	4.5	0.693854	7.68817e-07	1.8858e-05	5.20562e-06
FBgn0024432	FBtr0083575	3.22335	TRUE	4.5	0.693683	7.68817e-07	1.8858e-05	5.20562e-06
FBgn0031068	FBtr0074794	2.64801	TRUE	4.5	0.692647	7.68817e-07	1.8858e-05	5.20562e-06
FBgn0032222	FBtr0079992	3.09631	TRUE	4.5	0.692547	7.68817e-07	1.8858e-05	5.20562e-06
FBgn0015791	FBtr0080627	2.65645	TRUE	4.5	0.690704	7.68817e-07	1.8858e-05	5.20562e-06
FBgn0030096	FBtr0071342	2.92356	TRUE	4.5	0.690465	7.68817e-07	1.8858e-05	5.20562e-06
FBgn0035529	FBtr0300775	2.82783	TRUE	4.5	0.689749	7.68817e-07	1.8858e-05	5.20562e-06
FBgn0058002	FBtr0113773	2.46934	TRUE	4.5	0.688264	7.68817e-07	1.8858e-05	5.20562e-06
FBgn0031768	FBtr0343120	2.6158	TRUE	4.5	0.686562	7.68817e-07	1.8858e-05	5.20562e-06
FBgn0030628	FBtr0074020	3.36615	TRUE	4.5	0.684095	7.68817e-07	1.8858e-05	5.20562e-06
FBgn0285947	FBtr0074731	4.08251	TRUE	4.5	0.683667	7.68817e-07	1.8858e-05	5.20562e-06
FBgn0031231	FBtr0078124	2.90991	TRUE	4.5	0.683039	7.68817e-07	1.8858e-05	5.20562e-06
FBgn0033391	FBtr0302512	3.23175	TRUE	4.5	0.682639	7.68817e-07	1.8858e-05	5.20562e-06
FBgn0037200	FBtr0078552	2.67732	TRUE	4.5	0.682237	7.68817e-07	1.8858e-05	5.20562e-06
FBgn0037719	FBtr0100537	2.58396	TRUE	4.5	0.682139	7.68817e-07	1.8858e-05	5.20562e-06
FBgn0267976	FBtr0113781	3.41959	TRUE	4.5	0.681614	7.68817e-07	1.8858e-05	5.20562e-06
FBgn0036824	FBtr0075076	3.1379	TRUE	4.5	0.681391	7.68817e-07	1.8858e-05	5.20562e-06
FBgn0011705	FBtr0079782	3.12232	TRUE	4.5	0.681135	7.68817e-07	1.8858e-05	5.20562e-06
FBgn0032030	FBtr0079650	2.48618	TRUE	4.5	0.680759	7.68817e-07	1.8858e-05	5.20562e-06
FBgn0037614	FBtr0081905	3.27959	TRUE	4.5	0.678155	7.68817e-07	1.8858e-05	5.20562e-06
FBgn0037020	FBtr0078251	2.81218	TRUE	4.5	0.676569	7.68817e-07	1.8858e-05	5.20562e-06
FBgn0025615	FBtr0070690	2.86488	TRUE	4.5	0.674341	7.68817e-07	1.8858e-05	5.20562e-06
FBgn0086355	FBtr0085583	3.4941	TRUE	4.5	0.673757	7.68817e-07	1.8858e-05	5.20562e-06
FBgn0266674	FBtr0084034	3.21796	TRUE	4.5	0.673691	7.68817e-07	1.8858e-05	5.20562e-06
FBgn0286213	FBtr0075878	3.90899	TRUE	4.5	0.672581	7.68817e-07	1.8858e-05	5.20562e-06
FBgn0032032	FBtr0079651	2.28666	TRUE	4.5	0.672062	7.68817e-07	1.8858e-05	5.20562e-06
FBgn0030960	FBtr0074635	2.4024	TRUE	4.5	0.67178	7.68817e-07	1.8858e-05	5.20562e-06
FBgn0042083	FBtr0086126	3.20379	TRUE	4.5	0.670352	7.68817e-07	1.8858e-05	5.20562e-06
FBgn0032477	FBtr0080436	2.07845	TRUE	4.5	0.670277	7.68817e-07	1.8858e-05	5.20562e-06
FBgn0037121	FBtr0078432	2.35718	TRUE	4.5	0.670049	7.68817e-07	1.8858e-05	5.20562e-06
FBgn0038608	FBtr0083586	2.7558	TRUE	4.5	0.668967	7.68817e-07	1.8858e-05	5.20562e-06
FBgn0034141	FBtr0087121	2.72211	TRUE	4.5	0.666596	7.68817e-07	1.8858e-05	5.20562e-06
FBgn0034804	FBtr0071993	3.10995	TRUE	4.5	0.666261	7.68817e-07	1.8858e-05	5.20562e-06
FBgn0034008	FBtr0087392	2.74174	TRUE	4.5	0.665939	7.68817e-07	1.8858e-05	5.20562e-06
FBgn0013799	FBtr0074882	2.92543	TRUE	4.5	0.665561	7.68817e-07	1.8858e-05	5.20562e-06
FBgn0038771	FBtr0083837	3.47772	TRUE	4.5	0.664011	7.68817e-07	1.8858e-05	5.20562e-06
FBgn0030137	FBtr0071371	2.27055	TRUE	4.5	0.66323	7.68817e-07	1.8858e-05	5.20562e-06
FBgn0035059	FBtr0300130	2.94376	TRUE	4.5	0.661028	7.68817e-07	1.8858e-05	5.20562e-06
FBgn0034455	FBtr0086464	2.94728	TRUE	4.5	0.660791	7.68817e-07	1.8858e-05	5.20562e-06
FBgn0030136	FBtr0071360	3.76992	TRUE	4.5	0.660126	7.68817e-07	1.8858e-05	5.20562e-06
FBgn0002626	FBtr0085592	3.73229	TRUE	4.5	0.660038	7.68817e-07	1.8858e-05	5.20562e-06
FBgn0039589	FBtr0085304	3.08442	TRUE	4.5	0.659511	7.68817e-07	1.8858e-05	5.20562e-06
FBgn0023513	FBtr0070310	3.16635	TRUE	4.5	0.659052	7.68817e-07	1.8858e-05	5.20562e-06
FBgn0030465	FBtr0073755	2.95597	TRUE	4.5	0.658349	7.68817e-07	1.8858e-05	5.20562e-06
FBgn0052736	FBtr0071008	2.23158	TRUE	4.5	0.657152	7.68817e-07	1.8858e-05	5.20562e-06
FBgn0266441	FBtr0344433	3.02484	TRUE	4.5	0.657065	7.68817e-07	1.8858e-05	5.20562e-06
FBgn0086446	FBtr0081157	2.51966	TRUE	4.5	0.654886	7.68817e-07	1.8858e-05	5.20562e-06
FBgn0033241	FBtr0088879	3.14895	TRUE	4.5	0.654754	7.68817e-07	1.8858e-05	5.20562e-06
FBgn0053100	FBtr0300475	2.43658	TRUE	4.5	0.652071	7.68817e-07	1.8858e-05	5.20562e-06
FBgn0034436	FBtr0086519	2.2411	TRUE	4.5	0.650276	7.68817e-07	1.8858e-05	5.20562e-06
FBgn0052446	FBtr0078426	3.25643	TRUE	4.5	0.6491	7.68817e-07	1.8858e-05	5.20562e-06
FBgn0010551	FBtr0086615	3.45874	TRUE	4.5	0.648322	7.68817e-07	1.8858e-05	5.20562e-06
FBgn0039150	FBtr0300705	3.09091	TRUE	4.5	0.64787	7.68817e-07	1.8858e-05	5.20562e-06
FBgn0033127	FBtr0089023	2.67054	TRUE	4.5	0.64727	7.68817e-07	1.8858e-05	5.20562e-06
FBgn0002566	FBtr0111125	2.8288	TRUE	4.5	0.64692	7.68817e-07	1.8858e-05	5.20562e-06
FBgn0004889	FBtr0082188	3.09975	TRUE	4.5	0.646483	7.68817e-07	1.8858e-05	5.20562e-06
FBgn0036005	FBtr0076471	2.58003	TRUE	4.5	0.646212	7.68817e-07	1.8858e-05	5.20562e-06
FBgn0040751	FBtr0087581	1.79055	TRUE	4.5	0.645375	7.68817e-07	1.8858e-05	5.20562e-06
FBgn0033391	FBtr0302511	2.6604	TRUE	4.5	0.643562	7.68817e-07	1.8858e-05	5.20562e-06
FBgn0026634	FBtr0083114	3.1514	TRUE	4.5	0.642794	7.68817e-07	1.8858e-05	5.20562e-06
FBgn0033784	FBtr0087803	2.90841	TRUE	4.5	0.642725	7.68817e-07	1.8858e-05	5.20562e-06
FBgn0033544	FBtr0088217	3.12364	TRUE	4.5	0.641772	7.68817e-07	1.8858e-05	5.20562e-06
FBgn0260855	FBtr0070141	2.95823	TRUE	4.5	0.641154	7.68817e-07	1.8858e-05	5.20562e-06
FBgn0032244	FBtr0080019	2.94797	TRUE	4.5	0.640888	7.68817e-07	1.8858e-05	5.20562e-06
FBgn0017430	FBtr0076650	2.7925	TRUE	4.5	0.640005	7.68817e-07	1.8858e-05	5.20562e-06
FBgn0037009	FBtr0078209	2.37301	TRUE	4.5	0.639639	7.68817e-07	1.8858e-05	5.20562e-06
FBgn0053155	FBtr0100452	2.93379	TRUE	4.5	0.638	7.68817e-07	1.8858e-05	5.20562e-06
FBgn0022981	FBtr0078859	3.62649	TRUE	4.5	0.637532	7.68817e-07	1.8858e-05	5.20562e-06
FBgn0013305	FBtr0089876	2.8178	TRUE	4.5	0.636828	7.68817e-07	1.8858e-05	5.20562e-06
FBgn0036691	FBtr0075278	2.76417	TRUE	4.5	0.636768	7.68817e-07	1.8858e-05	5.20562e-06
FBgn0037655	FBtr0300746	3.61624	TRUE	4.5	0.636619	7.68817e-07	1.8858e-05	5.20562e-06
FBgn0036239	FBtr0076058	3.07902	TRUE	4.5	0.632527	7.68817e-07	1.8858e-05	5.20562e-06
FBgn0030010	FBtr0071157	2.69196	TRUE	4.5	0.632172	7.68817e-07	1.8858e-05	5.20562e-06
FBgn0034313	FBtr0086772	3.45817	TRUE	4.5	0.632095	7.68817e-07	1.8858e-05	5.20562e-06
FBgn0032987	FBtr0085961	4.36999	TRUE	4.5	0.629545	7.68817e-07	1.8858e-05	5.20562e-06
FBgn0038149	FBtr0082760	3.44621	TRUE	4.5	0.62911	7.68817e-07	1.8858e-05	5.20562e-06
FBgn0036335	FBtr0075897	2.49291	TRUE	4.5	0.627728	7.68817e-07	1.8858e-05	5.20562e-06
FBgn0043012	FBtr0084103	2.88228	TRUE	4.5	0.627615	7.68817e-07	1.8858e-05	5.20562e-06
FBgn0039450	FBtr0085039	2.70453	TRUE	4.5	0.626748	7.68817e-07	1.8858e-05	5.20562e-06
FBgn0000376	FBtr0070495	3.53228	TRUE	4.5	0.625076	7.68817e-07	1.8858e-05	5.20562e-06
FBgn0262732	FBtr0330137	3.11328	TRUE	4.5	0.624399	7.68817e-07	1.8858e-05	5.20562e-06
FBgn0010315	FBtr0300391	3.40413	TRUE	4.5	0.624236	7.68817e-07	1.8858e-05	5.20562e-06
FBgn0015359	FBtr0072877	2.94318	TRUE	4.5	0.624198	7.68817e-07	1.8858e-05	5.20562e-06
FBgn0033631	FBtr0110897	3.4358	TRUE	4.5	0.622133	7.68817e-07	1.8858e-05	5.20562e-06
FBgn0262515	FBtr0088587	3.10451	TRUE	4.5	0.620953	7.68817e-07	1.8858e-05	5.20562e-06
FBgn0001125	FBtr0077867	3.48794	TRUE	4.5	0.620918	7.68817e-07	1.8858e-05	5.20562e-06
FBgn0035993	FBtr0076504	2.82107	TRUE	4.5	0.615775	7.68817e-07	1.8858e-05	5.20562e-06
FBgn0262512	FBtr0087341	3.29344	TRUE	4.5	0.615743	7.68817e-07	1.8858e-05	5.20562e-06
FBgn0035283	FBtr0072833	2.79786	TRUE	4.5	0.614659	7.68817e-07	1.8858e-05	5.20562e-06
FBgn0051460	FBtr0081873	2.46726	TRUE	4.5	0.614109	7.68817e-07	1.8858e-05	5.20562e-06
FBgn0034585	FBtr0071640	2.92175	TRUE	4.5	0.613969	7.68817e-07	1.8858e-05	5.20562e-06
FBgn0015602	FBtr0087442	3.19127	TRUE	4.5	0.612975	7.68817e-07	1.8858e-05	5.20562e-06
FBgn0040396	FBtr0343600	2.65581	TRUE	4.5	0.611021	7.68817e-07	1.8858e-05	5.20562e-06
FBgn0038206	FBtr0082891	3.10238	TRUE	4.5	0.610219	7.68817e-07	1.8858e-05	5.20562e-06
FBgn0014010	FBtr0077795	2.99341	TRUE	4.5	0.608092	7.68817e-07	1.8858e-05	5.20562e-06
FBgn0031267	FBtr0078074	3.04398	TRUE	4.5	0.607568	7.68817e-07	1.8858e-05	5.20562e-06
FBgn0086254	FBtr0331547	3.66769	TRUE	4.5	0.607255	7.68817e-07	1.8858e-05	5.20562e-06
FBgn0037481	FBtr0081606	2.49094	TRUE	4.5	0.607112	7.68817e-07	1.8858e-05	5.20562e-06
FBgn0027095	FBtr0083283	2.80853	TRUE	4.5	0.605892	7.68817e-07	1.8858e-05	5.20562e-06
FBgn0266411	FBtr0344373	3.32805	TRUE	4.5	0.605457	7.68817e-07	1.8858e-05	5.20562e-06
FBgn0027495	FBtr0087983	2.76377	TRUE	4.5	0.605433	7.68817e-07	1.8858e-05	5.20562e-06
FBgn0024360	FBtr0070236	2.97075	TRUE	4.5	0.605405	7.68817e-07	1.8858e-05	5.20562e-06
FBgn0030658	FBtr0074046	2.825	TRUE	4.5	0.602916	7.68817e-07	1.8858e-05	5.20562e-06
FBgn0033468	FBtr0088440	2.3782	TRUE	4.5	0.601047	7.68817e-07	1.8858e-05	5.20562e-06
FBgn0035592	FBtr0077181	2.53862	TRUE	4.5	0.600471	7.68817e-07	1.8858e-05	5.20562e-06
FBgn0037313	FBtr0078785	2.72566	TRUE	4.5	0.600029	7.68817e-07	1.8858e-05	5.20562e-06
FBgn0032005	FBtr0079631	3.47621	TRUE	4.5	0.599322	7.68817e-07	1.8858e-05	5.20562e-06
FBgn0020407	FBtr0083259	2.53602	TRUE	4.5	0.598112	7.68817e-07	1.8858e-05	5.20562e-06
FBgn0013325	FBtr0086533	3.84184	TRUE	4.5	0.596532	7.68817e-07	1.8858e-05	5.20562e-06
FBgn0019925	FBtr0083117	2.86488	TRUE	4.5	0.596429	7.68817e-07	1.8858e-05	5.20562e-06
FBgn0029733	FBtr0070721	3.47986	TRUE	4.5	0.594308	7.68817e-07	1.8858e-05	5.20562e-06
FBgn0259933	FBtr0300240	3.09091	TRUE	4.5	0.592586	7.68817e-07	1.8858e-05	5.20562e-06
FBgn0260407	FBtr0080566	2.54817	TRUE	4.5	0.592377	7.68817e-07	1.8858e-05	5.20562e-06
FBgn0052803	FBtr0070356	2.52023	TRUE	4.5	0.589065	7.68817e-07	1.8858e-05	5.20562e-06
FBgn0030686	FBtr0074090	2.95685	TRUE	4.5	0.588824	7.68817e-07	1.8858e-05	5.20562e-06
FBgn0037671	FBtr0081978	3.47342	TRUE	4.5	0.585723	7.68817e-07	1.8858e-05	5.20562e-06
FBgn0024994	FBtr0070501	3.00026	TRUE	4.5	0.585537	7.68817e-07	1.8858e-05	5.20562e-06
FBgn0035807	FBtr0076821	3.71695	TRUE	4.5	0.58546	7.68817e-07	1.8858e-05	5.20562e-06
FBgn0032397	FBtr0080309	3.17812	TRUE	4.5	0.584194	7.68817e-07	1.8858e-05	5.20562e-06
FBgn0036549	FBtr0075512	2.41512	TRUE	4.5	0.582903	7.68817e-07	1.8858e-05	5.20562e-06
FBgn0037755	FBtr0113214	3.54551	TRUE	4.5	0.581604	7.68817e-07	1.8858e-05	5.20562e-06
FBgn0039828	FBtr0085757	2.89817	TRUE	4.5	0.581327	7.68817e-07	1.8858e-05	5.20562e-06
FBgn0003449	FBtr0070748	3.17243	TRUE	4.5	0.579826	7.68817e-07	1.8858e-05	5.20562e-06
FBgn0030850	FBtr0074487	3.34047	TRUE	4.5	0.579448	7.68817e-07	1.8858e-05	5.20562e-06
FBgn0039427	FBtr0085012	2.88961	TRUE	4.5	0.578735	7.68817e-07	1.8858e-05	5.20562e-06
FBgn0038578	FBtr0083558	2.80765	TRUE	4.5	0.578277	7.68817e-07	1.8858e-05	5.20562e-06
FBgn0033740	FBtr0339638	3.03935	TRUE	4.5	0.578177	7.68817e-07	1.8858e-05	5.20562e-06
FBgn0033663	FBtr0088058	3.44096	TRUE	4.5	0.577467	7.68817e-07	1.8858e-05	5.20562e-06
FBgn0043010	FBtr0087763	3.25604	TRUE	4.5	0.575432	7.68817e-07	1.8858e-05	5.20562e-06
FBgn0053832	FBtr0091836	4.71474	TRUE	4.5	0.574897	7.68817e-07	1.8858e-05	5.20562e-06
FBgn0260960	FBtr0075355	3.14149	TRUE	4.5	0.574668	7.68817e-07	1.8858e-05	5.20562e-06
FBgn0033773	FBtr0087865	2.86428	TRUE	4.5	0.573715	7.68817e-07	1.8858e-05	5.20562e-06
FBgn0027055	FBtr0078269	2.87617	TRUE	4.5	0.572242	7.68817e-07	1.8858e-05	5.20562e-06
FBgn0037892	FBtr0082384	2.41191	TRUE	4.5	0.571998	7.68817e-07	1.8858e-05	5.20562e-06
FBgn0039731	FBtr0085546	2.76638	TRUE	4.5	0.571612	7.68817e-07	1.8858e-05	5.20562e-06
FBgn0033350	FBtr0088653	2.38487	TRUE	4.5	0.57102	7.68817e-07	1.8858e-05	5.20562e-06
FBgn0038316	FBtr0083123	3.17495	TRUE	4.5	0.570784	7.68817e-07	1.8858e-05	5.20562e-06
FBgn0031263	FBtr0078066	2.93976	TRUE	4.5	0.569982	7.68817e-07	1.8858e-05	5.20562e-06
FBgn0051717	FBtr0333409	2.28881	TRUE	4.5	0.569513	7.68817e-07	1.8858e-05	5.20562e-06
FBgn0033236	FBtr0088880	3.01823	TRUE	4.5	0.569449	7.68817e-07	1.8858e-05	5.20562e-06
FBgn0034583	FBtr0071541	2.90463	TRUE	4.5	0.569092	7.68817e-07	1.8858e-05	5.20562e-06
FBgn0037722	FBtr0082077	2.75595	TRUE	4.5	0.567984	7.68817e-07	1.8858e-05	5.20562e-06
FBgn0030672	FBtr0340308	4.06645	TRUE	4.5	0.566052	7.68817e-07	1.8858e-05	5.20562e-06
FBgn0037185	FBtr0078528	2.87862	TRUE	4.5	0.565646	7.68817e-07	1.8858e-05	5.20562e-06
FBgn0031950	FBtr0079493	2.92263	TRUE	4.5	0.565273	7.68817e-07	1.8858e-05	5.20562e-06
FBgn0035987	FBtr0110863	3.19708	TRUE	4.5	0.561085	7.68817e-07	1.8858e-05	5.20562e-06
FBgn0010398	FBtr0080092	2.80202	TRUE	4.5	0.560463	7.68817e-07	1.8858e-05	5.20562e-06
FBgn0035346	FBtr0072923	2.78941	TRUE	4.5	0.556711	7.68817e-07	1.8858e-05	5.20562e-06
FBgn0034657	FBtr0071712	3.33811	TRUE	4.5	0.556248	7.68817e-07	1.8858e-05	5.20562e-06
FBgn0033195	FBtr0088951	2.50109	TRUE	4.5	0.554701	7.68817e-07	1.8858e-05	5.20562e-06
FBgn0029800	FBtr0070840	2.96958	TRUE	4.5	0.554443	7.68817e-07	1.8858e-05	5.20562e-06
FBgn0267365	FBtr0080062	2.73163	TRUE	4.5	0.552589	7.68817e-07	1.8858e-05	5.20562e-06
FBgn0028507	FBtr0080761	2.68204	TRUE	4.5	0.552212	7.68817e-07	1.8858e-05	5.20562e-06
FBgn0031836	FBtr0079291	3.51651	TRUE	4.5	0.551506	7.68817e-07	1.8858e-05	5.20562e-06
FBgn0042135	FBtr0088937	3.12101	TRUE	4.5	0.551034	7.68817e-07	1.8858e-05	5.20562e-06
FBgn0052638	FBtr0300453	2.59826	TRUE	4.5	0.550877	7.68817e-07	1.8858e-05	5.20562e-06
FBgn0011361	FBtr0072676	2.81201	TRUE	4.5	0.550308	7.68817e-07	1.8858e-05	5.20562e-06
FBgn0034961	FBtr0072165	2.51844	TRUE	4.5	0.548446	7.68817e-07	1.8858e-05	5.20562e-06
FBgn0039212	FBtr0084670	2.85793	TRUE	4.5	0.548269	7.68817e-07	1.8858e-05	5.20562e-06
FBgn0051155	FBtr0083137	2.89573	TRUE	4.5	0.547985	7.68817e-07	1.8858e-05	5.20562e-06
FBgn0032514	FBtr0080470	3.1	TRUE	4.5	0.547824	7.68817e-07	1.8858e-05	5.20562e-06
FBgn0030311	FBtr0073510	2.46664	TRUE	4.5	0.546146	7.68817e-07	1.8858e-05	5.20562e-06
FBgn0028375	FBtr0080852	2.9629	TRUE	4.5	0.545751	7.68817e-07	1.8858e-05	5.20562e-06
FBgn0011204	FBtr0072706	3.85611	TRUE	4.5	0.545288	7.68817e-07	1.8858e-05	5.20562e-06
FBgn0035722	FBtr0076939	2.68296	TRUE	4.5	0.544891	7.68817e-07	1.8858e-05	5.20562e-06
FBgn0039831	FBtr0085758	3.02855	TRUE	4.5	0.544036	7.68817e-07	1.8858e-05	5.20562e-06
FBgn0032214	FBtr0079987	3.32874	TRUE	4.5	0.543529	7.68817e-07	1.8858e-05	5.20562e-06
FBgn0262976	FBtr0071248	2.43069	TRUE	4.5	0.541464	7.68817e-07	1.8858e-05	5.20562e-06
FBgn0004838	FBtr0301404	3.75424	TRUE	4.5	0.539752	7.68817e-07	1.8858e-05	5.20562e-06
FBgn0037632	FBtr0081918	3.71435	TRUE	4.5	0.538987	7.68817e-07	1.8858e-05	5.20562e-06
FBgn0041191	FBtr0078693	2.93243	TRUE	4.5	0.538938	7.68817e-07	1.8858e-05	5.20562e-06
FBgn0033413	FBtr0300293	2.82257	TRUE	4.5	0.538432	7.68817e-07	1.8858e-05	5.20562e-06
FBgn0040309	FBtr0073763	3.88628	TRUE	4.5	0.537753	7.68817e-07	1.8858e-05	5.20562e-06
FBgn0037679	FBtr0082055	2.72977	TRUE	4.5	0.536421	7.68817e-07	1.8858e-05	5.20562e-06
FBgn0031090	FBtr0303258	3.39151	TRUE	4.5	0.535586	7.68817e-07	1.8858e-05	5.20562e-06
FBgn0015229	FBtr0084157	3.36482	TRUE	4.5	0.534949	7.68817e-07	1.8858e-05	5.20562e-06
FBgn0030519	FBtr0073819	2.78702	TRUE	4.5	0.534058	7.68817e-07	1.8858e-05	5.20562e-06
FBgn0035900	FBtr0076656	2.27463	TRUE	4.5	0.533892	7.68817e-07	1.8858e-05	5.20562e-06
FBgn0024542	FBtr0333367	2.78379	TRUE	4.5	0.531282	7.68817e-07	1.8858e-05	5.20562e-06
FBgn0000308	FBtr0079235	3.01361	TRUE	4.5	0.530651	7.68817e-07	1.8858e-05	5.20562e-06
FBgn0030391	FBtr0073668	2.84351	TRUE	4.5	0.530378	7.68817e-07	1.8858e-05	5.20562e-06
FBgn0037372	FBtr0078678	2.60435	TRUE	4.5	0.529402	7.68817e-07	1.8858e-05	5.20562e-06
FBgn0001149	FBtr0082607	3.77339	TRUE	4.5	0.527129	7.68817e-07	1.8858e-05	5.20562e-06
FBgn0038195	FBtr0082869	3.12264	TRUE	4.5	0.527104	7.68817e-07	1.8858e-05	5.20562e-06
FBgn0029857	FBtr0070897	2.65731	TRUE	4.5	0.526299	7.68817e-07	1.8858e-05	5.20562e-06
FBgn0034362	FBtr0086706	2.75841	TRUE	4.5	0.52415	7.68817e-07	1.8858e-05	5.20562e-06
FBgn0285913	FBtr0309999	2.96043	TRUE	4.5	0.524042	7.68817e-07	1.8858e-05	5.20562e-06
FBgn0004889	FBtr0082191	3.5397	TRUE	4.5	0.523917	7.68817e-07	1.8858e-05	5.20562e-06
FBgn0011586	FBtr0071266	3.03125	TRUE	4.5	0.522384	7.68817e-07	1.8858e-05	5.20562e-06
FBgn0000588	FBtr0080325	3.24077	TRUE	4.5	0.522133	7.68817e-07	1.8858e-05	5.20562e-06
FBgn0034893	FBtr0072084	2.38528	TRUE	4.5	0.521996	7.68817e-07	1.8858e-05	5.20562e-06
FBgn0013770	FBtr0087592	3.59123	TRUE	4.5	0.521796	7.68817e-07	1.8858e-05	5.20562e-06
FBgn0039449	FBtr0085047	2.84015	TRUE	4.5	0.521052	7.68817e-07	1.8858e-05	5.20562e-06
FBgn0038742	FBtr0083817	3.11729	TRUE	4.5	0.520444	7.68817e-07	1.8858e-05	5.20562e-06
FBgn0035165	FBtr0072583	3.08289	TRUE	4.5	0.520041	7.68817e-07	1.8858e-05	5.20562e-06
FBgn0030956	FBtr0074661	3.10547	TRUE	4.5	0.519623	7.68817e-07	1.8858e-05	5.20562e-06
FBgn0040347	FBtr0070170	3.41181	TRUE	4.5	0.51923	7.68817e-07	1.8858e-05	5.20562e-06
FBgn0264712	FBtr0078792	3.28219	TRUE	4.5	0.518705	7.68817e-07	1.8858e-05	5.20562e-06
FBgn0030431	FBtr0073695	2.70317	TRUE	4.5	0.516121	7.68817e-07	1.8858e-05	5.20562e-06
FBgn0039966	FBtr0299903	2.85121	TRUE	4.5	0.514804	7.68817e-07	1.8858e-05	5.20562e-06
FBgn0037656	FBtr0081967	2.73014	TRUE	4.5	0.514526	7.68817e-07	1.8858e-05	5.20562e-06
FBgn0033050	FBtr0085972	2.98858	TRUE	4.5	0.513559	7.68817e-07	1.8858e-05	5.20562e-06
FBgn0030790	FBtr0074332	3.60554	TRUE	4.5	0.513516	7.68817e-07	1.8858e-05	5.20562e-06
FBgn0034938	FBtr0072208	2.4648	TRUE	4.5	0.51246	7.68817e-07	1.8858e-05	5.20562e-06
FBgn0035083	FBtr0072411	3.08591	TRUE	4.5	0.51011	7.68817e-07	1.8858e-05	5.20562e-06
FBgn0015614	FBtr0088930	3.40618	TRUE	4.5	0.509448	7.68817e-07	1.8858e-05	5.20562e-06
FBgn0038400	FBtr0344013	3.04864	TRUE	4.5	0.508045	7.68817e-07	1.8858e-05	5.20562e-06
FBgn0265174	FBtr0339071	2.81809	TRUE	4.5	0.507814	7.68817e-07	1.8858e-05	5.20562e-06
FBgn0038608	FBtr0302307	3.18453	TRUE	4.5	0.50777	7.68817e-07	1.8858e-05	5.20562e-06
FBgn0000032	FBtr0085609	3.24256	TRUE	4.5	0.506159	7.68817e-07	1.8858e-05	5.20562e-06
FBgn0053635	FBtr0091612	2.19796	TRUE	4.5	0.505323	7.68817e-07	1.8858e-05	5.20562e-06
FBgn0011207	FBtr0079847	3.38166	TRUE	4.5	0.503199	7.68817e-07	1.8858e-05	5.20562e-06
FBgn0037606	FBtr0081880	3.24148	TRUE	4.5	0.501766	7.68817e-07	1.8858e-05	5.20562e-06
FBgn0038234	FBtr0082953	2.46037	TRUE	4.5	0.501385	7.68817e-07	1.8858e-05	5.20562e-06
FBgn0032051	FBtr0079697	2.73307	TRUE	4.5	0.501202	7.68817e-07	1.8858e-05	5.20562e-06
FBgn0034753	FBtr0071933	3.64111	TRUE	4.5	0.500828	7.68817e-07	1.8858e-05	5.20562e-06
FBgn0034032	FBtr0087353	2.71031	TRUE	4.5	0.499845	7.68817e-07	1.8858e-05	5.20562e-06
FBgn0261722	FBtr0075541	2.94579	TRUE	4.5	0.498712	7.68817e-07	1.8858e-05	5.20562e-06
FBgn0001565	FBtr0343853	3.3706	TRUE	4.5	0.495834	7.68817e-07	1.8858e-05	5.20562e-06
FBgn0039265	FBtr0084760	2.84227	TRUE	4.5	0.495508	7.68817e-07	1.8858e-05	5.20562e-06
FBgn0046296	FBtr0075995	2.82458	TRUE	4.5	0.495466	7.68817e-07	1.8858e-05	5.20562e-06
FBgn0086253	FBtr0084320	2.76155	TRUE	4.5	0.494902	7.68817e-07	1.8858e-05	5.20562e-06
FBgn0010504	FBtr0088811	2.48917	TRUE	4.5	0.493479	7.68817e-07	1.8858e-05	5.20562e-06
FBgn0046247	FBtr0085159	2.9723	TRUE	4.5	0.493106	7.68817e-07	1.8858e-05	5.20562e-06
FBgn0267347	FBtr0305565	2.85579	TRUE	4.5	0.49244	7.68817e-07	1.8858e-05	5.20562e-06
FBgn0011016	FBtr0075453	3.13919	TRUE	4.5	0.489406	7.68817e-07	1.8858e-05	5.20562e-06
FBgn0039538	FBtr0085216	2.568	TRUE	4.5	0.489203	7.68817e-07	1.8858e-05	5.20562e-06
FBgn0052521	FBtr0077234	2.49206	TRUE	4.5	0.489115	7.68817e-07	1.8858e-05	5.20562e-06
FBgn0039165	FBtr0084555	2.51802	TRUE	4.5	0.488209	7.68817e-07	1.8858e-05	5.20562e-06
FBgn0029885	FBtr0070992	2.75041	TRUE	4.5	0.488043	7.68817e-07	1.8858e-05	5.20562e-06
FBgn0003716	FBtr0079086	3.04809	TRUE	4.5	0.487966	7.68817e-07	1.8858e-05	5.20562e-06
FBgn0002525	FBtr0079100	3.40435	TRUE	4.5	0.486711	7.68817e-07	1.8858e-05	5.20562e-06
FBgn0285951	FBtr0075379	2.50342	TRUE	4.5	0.486071	7.68817e-07	1.8858e-05	5.20562e-06
FBgn0015522	FBtr0086799	3.26902	TRUE	4.5	0.485456	7.68817e-07	1.8858e-05	5.20562e-06
FBgn0039336	FBtr0084839	2.69248	TRUE	4.5	0.4829	7.68817e-07	1.8858e-05	5.20562e-06
FBgn0026378	FBtr0086462	2.50317	TRUE	4.5	0.481211	7.68817e-07	1.8858e-05	5.20562e-06
FBgn0283666	FBtr0072177	2.96396	TRUE	4.5	0.480636	7.68817e-07	1.8858e-05	5.20562e-06
FBgn0031682	FBtr0079018	3.16889	TRUE	4.5	0.480152	7.68817e-07	1.8858e-05	5.20562e-06
FBgn0037359	FBtr0078712	2.64795	TRUE	4.5	0.479458	7.68817e-07	1.8858e-05	5.20562e-06
FBgn0037756	FBtr0082140	3.12531	TRUE	4.5	0.479288	7.68817e-07	1.8858e-05	5.20562e-06
FBgn0031252	FBtr0078090	3.14254	TRUE	4.5	0.478745	7.68817e-07	1.8858e-05	5.20562e-06
FBgn0037317	FBtr0100433	2.68801	TRUE	4.5	0.477765	7.68817e-07	1.8858e-05	5.20562e-06
FBgn0036740	FBtr0075201	2.6474	TRUE	4.5	0.474402	7.68817e-07	1.8858e-05	5.20562e-06
FBgn0033179	FBtr0088997	3.12507	TRUE	4.5	0.474182	7.68817e-07	1.8858e-05	5.20562e-06
FBgn0036386	FBtr0075792	3.00272	TRUE	4.5	0.474006	7.68817e-07	1.8858e-05	5.20562e-06
FBgn0037364	FBtr0078727	3.5507	TRUE	4.5	0.472259	7.68817e-07	1.8858e-05	5.20562e-06
FBgn0261238	FBtr0081614	3.04209	TRUE	4.5	0.4681	7.68817e-07	1.8858e-05	5.20562e-06
FBgn0033413	FBtr0333003	2.88342	TRUE	4.5	0.466864	7.68817e-07	1.8858e-05	5.20562e-06
FBgn0053113	FBtr0079039	3.05961	TRUE	4.5	0.46643	7.68817e-07	1.8858e-05	5.20562e-06
FBgn0051648	FBtr0079098	2.38361	TRUE	4.5	0.466331	7.68817e-07	1.8858e-05	5.20562e-06
FBgn0058191	FBtr0113826	3.14621	TRUE	4.5	0.46323	7.68817e-07	1.8858e-05	5.20562e-06
FBgn0003410	FBtr0075332	3.43641	TRUE	4.5	0.462957	7.68817e-07	1.8858e-05	5.20562e-06
FBgn0026250	FBtr0083572	3.51451	TRUE	4.5	0.462661	7.68817e-07	1.8858e-05	5.20562e-06
FBgn0037843	FBtr0082286	3.31986	TRUE	4.5	0.461452	7.68817e-07	1.8858e-05	5.20562e-06
FBgn0038857	FBtr0084033	2.85492	TRUE	4.5	0.461269	7.68817e-07	1.8858e-05	5.20562e-06
FBgn0015296	FBtr0076458	2.88772	TRUE	4.5	0.46116	7.68817e-07	1.8858e-05	5.20562e-06
FBgn0038584	FBtr0083609	3.17103	TRUE	4.5	0.458316	7.68817e-07	1.8858e-05	5.20562e-06
FBgn0035471	FBtr0073159	3.10056	TRUE	4.5	0.457674	7.68817e-07	1.8858e-05	5.20562e-06
FBgn0036063	FBtr0076354	2.71654	TRUE	4.5	0.452366	7.68817e-07	1.8858e-05	5.20562e-06
FBgn0043457	FBtr0273268	2.94307	TRUE	4.5	0.452267	7.68817e-07	1.8858e-05	5.20562e-06
FBgn0030894	FBtr0074527	3.15089	TRUE	4.5	0.451346	7.68817e-07	1.8858e-05	5.20562e-06
FBgn0013718	FBtr0100040	2.9681	TRUE	4.5	0.451097	7.68817e-07	1.8858e-05	5.20562e-06
FBgn0030813	FBtr0074381	3.09887	TRUE	4.5	0.450462	7.68817e-07	1.8858e-05	5.20562e-06
FBgn0086605	FBtr0078949	3.10886	TRUE	4.5	0.446784	7.68817e-07	1.8858e-05	5.20562e-06
FBgn0035440	FBtr0073082	2.83191	TRUE	4.5	0.444415	7.68817e-07	1.8858e-05	5.20562e-06
FBgn0285910	FBtr0070611	3.58149	TRUE	4.5	0.443014	7.68817e-07	1.8858e-05	5.20562e-06
FBgn0051618	FBtr0085893	4.42958	TRUE	4.5	0.442674	7.68817e-07	1.8858e-05	5.20562e-06
FBgn0030081	FBtr0071353	2.84239	TRUE	4.5	0.440802	7.68817e-07	1.8858e-05	5.20562e-06
FBgn0033690	FBtr0088012	2.58997	TRUE	4.5	0.440759	7.68817e-07	1.8858e-05	5.20562e-06
FBgn0027949	FBtr0081258	3.13033	TRUE	4.5	0.439145	7.68817e-07	1.8858e-05	5.20562e-06
FBgn0027547	FBtr0072853	2.98676	TRUE	4.5	0.438863	7.68817e-07	1.8858e-05	5.20562e-06
FBgn0030346	FBtr0073600	2.94939	TRUE	4.5	0.438656	7.68817e-07	1.8858e-05	5.20562e-06
FBgn0044510	FBtr0111146	3.50742	TRUE	4.5	0.43809	7.68817e-07	1.8858e-05	5.20562e-06
FBgn0031881	FBtr0079389	2.6973	TRUE	4.5	0.437746	7.68817e-07	1.8858e-05	5.20562e-06
FBgn0024273	FBtr0085352	3.04194	TRUE	4.5	0.436529	7.68817e-07	1.8858e-05	5.20562e-06
FBgn0024846	FBtr0080534	2.8588	TRUE	4.5	0.431057	7.68817e-07	1.8858e-05	5.20562e-06
FBgn0031640	FBtr0077387	2.72712	TRUE	4.5	0.431052	7.68817e-07	1.8858e-05	5.20562e-06
FBgn0026192	FBtr0074456	3.48356	TRUE	4.5	0.428639	7.68817e-07	1.8858e-05	5.20562e-06
FBgn0263251	FBtr0076349	3.21573	TRUE	4.5	0.428365	7.68817e-07	1.8858e-05	5.20562e-06
FBgn0265598	FBtr0340365	3.05254	TRUE	4.5	0.428056	7.68817e-07	1.8858e-05	5.20562e-06
FBgn0041186	FBtr0085409	3.28347	TRUE	4.5	0.427057	7.68817e-07	1.8858e-05	5.20562e-06
FBgn0014906	FBtr0077576	3.1196	TRUE	4.5	0.426997	7.68817e-07	1.8858e-05	5.20562e-06
FBgn0033816	FBtr0087759	2.88479	TRUE	4.5	0.42644	7.68817e-07	1.8858e-05	5.20562e-06
FBgn0026761	FBtr0336666	3.11821	TRUE	4.5	0.424554	7.68817e-07	1.8858e-05	5.20562e-06
FBgn0033716	FBtr0087902	2.61264	TRUE	4.5	0.42335	7.68817e-07	1.8858e-05	5.20562e-06
FBgn0036928	FBtr0074903	3.22399	TRUE	4.5	0.422415	7.68817e-07	1.8858e-05	5.20562e-06
FBgn0058006	FBtr0111230	3.08887	TRUE	4.5	0.41657	7.68817e-07	1.8858e-05	5.20562e-06
FBgn0038515	FBtr0083505	3.22039	TRUE	4.5	0.415995	7.68817e-07	1.8858e-05	5.20562e-06
FBgn0029822	FBtr0070826	3.20637	TRUE	4.5	0.415075	7.68817e-07	1.8858e-05	5.20562e-06
FBgn0047038	FBtr0076276	2.57876	TRUE	4.5	0.414787	7.68817e-07	1.8858e-05	5.20562e-06
FBgn0032482	FBtr0080441	3.18937	TRUE	4.5	0.413096	7.68817e-07	1.8858e-05	5.20562e-06
FBgn0262937	FBtr0072663	2.94268	TRUE	4.5	0.412926	7.68817e-07	1.8858e-05	5.20562e-06
FBgn0034915	FBtr0072235	2.74055	TRUE	4.5	0.411972	7.68817e-07	1.8858e-05	5.20562e-06
FBgn0001995	FBtr0080843	2.7714	TRUE	4.5	0.411367	7.68817e-07	1.8858e-05	5.20562e-06
FBgn0029849	FBtr0070874	2.86103	TRUE	4.5	0.410857	7.68817e-07	1.8858e-05	5.20562e-06
FBgn0039993	FBtr0302409	3.11847	TRUE	4.5	0.410673	7.68817e-07	1.8858e-05	5.20562e-06
FBgn0036774	FBtr0075121	2.63463	TRUE	4.5	0.409049	7.68817e-07	1.8858e-05	5.20562e-06
FBgn0033101	FBtr0086134	3.13011	TRUE	4.5	0.407325	7.68817e-07	1.8858e-05	5.20562e-06
FBgn0033979	FBtr0087453	3.94327	TRUE	4.5	0.407232	7.68817e-07	1.8858e-05	5.20562e-06
FBgn0000447	FBtr0081890	3.0711	TRUE	4.5	0.407178	7.68817e-07	1.8858e-05	5.20562e-06
FBgn0031871	FBtr0079366	2.8781	TRUE	4.5	0.404768	7.68817e-07	1.8858e-05	5.20562e-06
FBgn0283478	FBtr0335504	3.44312	TRUE	4.5	0.403919	7.68817e-07	1.8858e-05	5.20562e-06
FBgn0036671	FBtr0075337	2.81208	TRUE	4.5	0.402687	7.68817e-07	1.8858e-05	5.20562e-06
FBgn0036988	FBtr0078230	2.90837	TRUE	4.5	0.399898	7.68817e-07	1.8858e-05	5.20562e-06
FBgn0014026	FBtr0343328	4.29256	TRUE	4.5	0.399738	7.68817e-07	1.8858e-05	5.20562e-06
FBgn0026619	FBtr0087862	2.77266	TRUE	4.5	0.399191	7.68817e-07	1.8858e-05	5.20562e-06
FBgn0004179	FBtr0078495	2.9638	TRUE	4.5	0.398806	7.68817e-07	1.8858e-05	5.20562e-06
FBgn0036199	FBtr0076115	3.09344	TRUE	4.5	0.398279	7.68817e-07	1.8858e-05	5.20562e-06
FBgn0026400	FBtr0085320	3.22592	TRUE	4.5	0.395981	7.68817e-07	1.8858e-05	5.20562e-06
FBgn0031256	FBtr0078060	2.92837	TRUE	4.5	0.389472	7.68817e-07	1.8858e-05	5.20562e-06
FBgn0035524	FBtr0073242	3.12586	TRUE	4.5	0.387447	7.68817e-07	1.8858e-05	5.20562e-06
FBgn0035763	FBtr0076884	2.98941	TRUE	4.5	0.386882	7.68817e-07	1.8858e-05	5.20562e-06
FBgn0263987	FBtr0070794	3.39684	TRUE	4.5	0.386134	7.68817e-07	1.8858e-05	5.20562e-06
FBgn0027865	FBtr0084912	2.96665	TRUE	4.5	0.384408	7.68817e-07	1.8858e-05	5.20562e-06
FBgn0030943	FBtr0074601	3.0402	TRUE	4.5	0.383174	7.68817e-07	1.8858e-05	5.20562e-06
FBgn0034405	FBtr0089970	3.35726	TRUE	4.5	0.381035	7.68817e-07	1.8858e-05	5.20562e-06
FBgn0005777	FBtr0082129	3.44723	TRUE	4.5	0.380596	7.68817e-07	1.8858e-05	5.20562e-06
FBgn0034542	FBtr0086245	3.09626	TRUE	4.5	0.380003	7.68817e-07	1.8858e-05	5.20562e-06
FBgn0264493	FBtr0301632	3.94144	TRUE	4.5	0.377739	7.68817e-07	1.8858e-05	5.20562e-06
FBgn0015360	FBtr0072904	3.20751	TRUE	4.5	0.377437	7.68817e-07	1.8858e-05	5.20562e-06
FBgn0011570	FBtr0077881	3.20117	TRUE	4.5	0.3767	7.68817e-07	1.8858e-05	5.20562e-06
FBgn0032518	FBtr0080524	3.82841	TRUE	4.5	0.375561	7.68817e-07	1.8858e-05	5.20562e-06
FBgn0029131	FBtr0086108	3.33795	TRUE	4.5	0.375054	7.68817e-07	1.8858e-05	5.20562e-06
FBgn0033374	FBtr0088632	3.59543	TRUE	4.5	0.374293	7.68817e-07	1.8858e-05	5.20562e-06
FBgn0000250	FBtr0080845	3.31067	TRUE	4.5	0.371208	7.68817e-07	1.8858e-05	5.20562e-06
FBgn0000117	FBtr0089991	3.58564	TRUE	4.5	0.371189	7.68817e-07	1.8858e-05	5.20562e-06
FBgn0264848	FBtr0075958	3.40842	TRUE	4.5	0.369872	7.68817e-07	1.8858e-05	5.20562e-06
FBgn0030456	FBtr0073726	3.02249	TRUE	4.5	0.369859	7.68817e-07	1.8858e-05	5.20562e-06
FBgn0030507	FBtr0073809	3.24983	TRUE	4.5	0.368782	7.68817e-07	1.8858e-05	5.20562e-06
FBgn0027539	FBtr0084739	3.18277	TRUE	4.5	0.366984	7.68817e-07	1.8858e-05	5.20562e-06
FBgn0030305	FBtr0073505	3.0266	TRUE	4.5	0.365767	7.68817e-07	1.8858e-05	5.20562e-06
FBgn0030603	FBtr0073958	3.26764	TRUE	4.5	0.365144	7.68817e-07	1.8858e-05	5.20562e-06
FBgn0036697	FBtr0075283	3.01466	TRUE	4.5	0.364813	7.68817e-07	1.8858e-05	5.20562e-06
FBgn0263260	FBtr0088433	2.83541	TRUE	4.5	0.364596	7.68817e-07	1.8858e-05	5.20562e-06
FBgn0032407	FBtr0080326	2.72009	TRUE	4.5	0.356747	7.68817e-07	1.8858e-05	5.20562e-06
FBgn0031815	FBtr0079258	3.19079	TRUE	4.5	0.356159	7.68817e-07	1.8858e-05	5.20562e-06
FBgn0004179	FBtr0078494	3.20107	TRUE	4.5	0.35553	7.68817e-07	1.8858e-05	5.20562e-06
FBgn0038810	FBtr0083911	2.9727	TRUE	4.5	0.354504	7.68817e-07	1.8858e-05	5.20562e-06
FBgn0010097	FBtr0081228	3.24994	TRUE	4.5	0.354369	7.68817e-07	1.8858e-05	5.20562e-06
FBgn0263832	FBtr0073202	3.15007	TRUE	4.5	0.350087	7.68817e-07	1.8858e-05	5.20562e-06
FBgn0037718	FBtr0082074	3.24436	TRUE	4.5	0.347872	7.68817e-07	1.8858e-05	5.20562e-06
FBgn0027291	FBtr0307904	3.41149	TRUE	4.5	0.347035	7.68817e-07	1.8858e-05	5.20562e-06
FBgn0001225	FBtr0076496	3.8759	TRUE	4.5	0.345771	7.68817e-07	1.8858e-05	5.20562e-06
FBgn0285962	FBtr0472693	2.50841	TRUE	4.5	0.344846	7.68817e-07	1.8858e-05	5.20562e-06
FBgn0026376	FBtr0075793	2.92866	TRUE	4.5	0.343299	7.68817e-07	1.8858e-05	5.20562e-06
FBgn0032194	FBtr0079947	3.14712	TRUE	4.5	0.342337	7.68817e-07	1.8858e-05	5.20562e-06
FBgn0030959	FBtr0074660	3.5022	TRUE	4.5	0.341463	7.68817e-07	1.8858e-05	5.20562e-06
FBgn0039066	FBtr0084374	3.21749	TRUE	4.5	0.340958	7.68817e-07	1.8858e-05	5.20562e-06
FBgn0029882	FBtr0070993	3.40172	TRUE	4.5	0.340745	7.68817e-07	1.8858e-05	5.20562e-06
FBgn0266420	FBtr0086768	3.27196	TRUE	4.5	0.339475	7.68817e-07	1.8858e-05	5.20562e-06
FBgn0000579	FBtr0077909	4.12355	TRUE	4.5	0.338742	7.68817e-07	1.8858e-05	5.20562e-06
FBgn0001092	FBtr0332618	4.23789	TRUE	4.5	0.33861	7.68817e-07	1.8858e-05	5.20562e-06
FBgn0032346	FBtr0080226	2.6718	TRUE	4.5	0.338105	7.68817e-07	1.8858e-05	5.20562e-06
FBgn0039627	FBtr0085360	2.86712	TRUE	4.5	0.33727	7.68817e-07	1.8858e-05	5.20562e-06
FBgn0016687	FBtr0273253	3.34959	TRUE	4.5	0.335382	7.68817e-07	1.8858e-05	5.20562e-06
FBgn0264302	FBtr0331507	3.11236	TRUE	4.5	0.335271	7.68817e-07	1.8858e-05	5.20562e-06
FBgn0039705	FBtr0085528	2.92915	TRUE	4.5	0.334778	7.68817e-07	1.8858e-05	5.20562e-06
FBgn0016698	FBtr0077589	2.75569	TRUE	4.5	0.333039	7.68817e-07	1.8858e-05	5.20562e-06
FBgn0030740	FBtr0074237	3.74232	TRUE	4.5	0.332305	7.68817e-07	1.8858e-05	5.20562e-06
FBgn0003169	FBtr0082977	3.15889	TRUE	4.5	0.332142	7.68817e-07	1.8858e-05	5.20562e-06
FBgn0039136	FBtr0084501	2.82533	TRUE	4.5	0.331404	7.68817e-07	1.8858e-05	5.20562e-06
FBgn0038686	FBtr0083746	2.88075	TRUE	4.5	0.330249	7.68817e-07	1.8858e-05	5.20562e-06
FBgn0029092	FBtr0088548	3.88675	TRUE	4.5	0.325902	7.68817e-07	1.8858e-05	5.20562e-06
FBgn0260986	FBtr0452078	3.27631	TRUE	4.5	0.325434	7.68817e-07	1.8858e-05	5.20562e-06
FBgn0002622	FBtr0084410	4.05954	TRUE	4.5	0.323298	7.68817e-07	1.8858e-05	5.20562e-06
FBgn0263863	FBtr0084272	3.09957	TRUE	4.5	0.322179	7.68817e-07	1.8858e-05	5.20562e-06
FBgn0052412	FBtr0077080	3.34216	TRUE	4.5	0.320078	7.68817e-07	1.8858e-05	5.20562e-06
FBgn0020255	FBtr0073471	4.05908	TRUE	4.5	0.319503	7.68817e-07	1.8858e-05	5.20562e-06
FBgn0030341	FBtr0334455	3.01457	TRUE	4.5	0.318859	7.68817e-07	1.8858e-05	5.20562e-06
FBgn0028325	FBtr0070708	3.50983	TRUE	4.5	0.3183	7.68817e-07	1.8858e-05	5.20562e-06
FBgn0030670	FBtr0074058	2.82777	TRUE	4.5	0.31813	7.68817e-07	1.8858e-05	5.20562e-06
FBgn0036493	FBtr0334105	3.00425	TRUE	4.5	0.317467	7.68817e-07	1.8858e-05	5.20562e-06
FBgn0028953	FBtr0086921	3.40422	TRUE	4.5	0.31547	7.68817e-07	1.8858e-05	5.20562e-06
FBgn0037884	FBtr0082364	3.18586	TRUE	4.5	0.313382	7.68817e-07	1.8858e-05	5.20562e-06
FBgn0283535	FBtr0078700	3.78855	TRUE	4.5	0.313308	7.68817e-07	1.8858e-05	5.20562e-06
FBgn0033526	FBtr0088310	3.46034	TRUE	4.5	0.312832	7.68817e-07	1.8858e-05	5.20562e-06
FBgn0037592	FBtr0081869	3.1485	TRUE	4.5	0.31124	7.68817e-07	1.8858e-05	5.20562e-06
FBgn0036341	FBtr0075886	3.1415	TRUE	4.5	0.310555	7.68817e-07	1.8858e-05	5.20562e-06
FBgn0004510	FBtr0085088	2.91944	TRUE	4.5	0.30853	7.68817e-07	1.8858e-05	5.20562e-06
FBgn0035425	FBtr0073093	3.09028	TRUE	4.5	0.306909	7.68817e-07	1.8858e-05	5.20562e-06
FBgn0010417	FBtr0074941	3.11932	TRUE	4.5	0.298512	7.68817e-07	1.8858e-05	5.20562e-06
FBgn0032204	FBtr0079984	2.86076	TRUE	4.5	0.297873	7.68817e-07	1.8858e-05	5.20562e-06
FBgn0027779	FBtr0080940	3.43102	TRUE	4.5	0.295925	7.68817e-07	1.8858e-05	5.20562e-06
FBgn0062449	FBtr0088078	2.63733	TRUE	4.5	0.295247	7.68817e-07	1.8858e-05	5.20562e-06
FBgn0030932	FBtr0340368	4.1942	TRUE	4.5	0.293535	7.68817e-07	1.8858e-05	5.20562e-06
FBgn0031655	FBtr0078992	2.95528	TRUE	4.5	0.286549	7.68817e-07	1.8858e-05	5.20562e-06
FBgn0035726	FBtr0076898	3.0289	TRUE	4.5	0.28504	7.68817e-07	1.8858e-05	5.20562e-06
FBgn0024734	FBtr0080856	3.39551	TRUE	4.5	0.275962	7.68817e-07	1.8858e-05	5.20562e-06
FBgn0029176	FBtr0085392	4.33398	TRUE	4.5	0.275902	7.68817e-07	1.8858e-05	5.20562e-06
FBgn0262559	FBtr0083563	3.48161	TRUE	4.5	0.269017	7.68817e-07	1.8858e-05	5.20562e-06
FBgn0010382	FBtr0080774	3.75608	TRUE	4.5	0.267455	7.68817e-07	1.8858e-05	5.20562e-06
FBgn0263106	FBtr0077123	3.58728	TRUE	4.5	0.265268	7.68817e-07	1.8858e-05	5.20562e-06
FBgn0010316	FBtr0088469	3.59747	TRUE	4.5	0.264916	7.68817e-07	1.8858e-05	5.20562e-06
FBgn0039565	FBtr0344620	2.96279	TRUE	4.5	0.256925	7.68817e-07	1.8858e-05	5.20562e-06
FBgn0002638	FBtr0077075	3.84202	TRUE	4.5	0.254878	7.68817e-07	1.8858e-05	5.20562e-06
FBgn0026144	FBtr0071052	3.26522	TRUE	4.5	0.246821	7.68817e-07	1.8858e-05	5.20562e-06
FBgn0003124	FBtr0100318	3.83434	TRUE	4.5	0.235308	7.68817e-07	1.8858e-05	5.20562e-06
FBgn0038723	FBtr0083803	2.83094	TRUE	4.5	0.233576	7.68817e-07	1.8858e-05	5.20562e-06
FBgn0023129	FBtr0076457	3.21566	TRUE	4.5	0.216298	7.68817e-07	1.8858e-05	5.20562e-06
FBgn0031875	FBtr0079350	3.1439	TRUE	4.5	0.214308	7.68817e-07	1.8858e-05	5.20562e-06
FBgn0284436	FBtr0088683	3.823	TRUE	4.5	0.213438	7.68817e-07	1.8858e-05	5.20562e-06
FBgn0046114	FBtr0084336	3.40268	TRUE	4.5	0.204832	7.68817e-07	1.8858e-05	5.20562e-06
FBgn0011763	FBtr0087740	3.50275	TRUE	4.5	0.16514	7.68817e-07	1.8858e-05	5.20562e-06
FBgn0024509	FBtr0084409	3.394	TRUE	4.5	0.154345	7.68817e-07	1.8858e-05	5.20562e-06
FBgn0031086	FBtr0070032	1.1248	TRUE	-0.4	-0.00927433	0.854289	1	0.929464
FBgn0053217	FBtr0070045	2.64997	TRUE	-2.33333	-0.272408	0.254739	1	0.475788
FBgn0052350	FBtr0070046	2.84998	TRUE	-1.53333	-0.0867115	0.456931	1	0.666513
FBgn0024733	FBtr0299869	4.26978	TRUE	0.733333	0.145592	0.730096	1	0.860178
FBgn0024733	FBtr0299870	3.81143	TRUE	0.4	0.0210902	0.854289	1	0.929464
FBgn0024733	FBtr0333910	2.69403	TRUE	3.6	0.624493	0.0734997	0.507222	0.220584
FBgn0040372	FBtr0332992	1.68144	TRUE	-2.4	-0.540677	0.239806	1	0.457087
FBgn0000316	FBtr0070064	2.87703	TRUE	-3.33333	-0.666185	0.098773	0.646018	0.263159
FBgn0000316	FBtr0070065	2.61575	TRUE	-1.76667	-0.597247	0.389019	1	0.611625
FBgn0000022	FBtr0070072	1.33834	TRUE	1.63333	0.569242	0.426457	1	0.642079
FBgn0004170	FBtr0070073	1.95735	TRUE	2.7	0.660587	0.180307	1	0.382835
FBgn0029522	FBtr0112947	3.18573	TRUE	-3.7	-0.331207	0.0663243	0.468147	0.209592
FBgn0029524	FBtr0070078	1.07424	TRUE	3.83333	1.24192	0.058058	0.424619	0.195081
FBgn0023537	FBtr0070092	3.18385	TRUE	2.73333	0.185403	0.175015	0.994865	0.376268
FBgn0023537	FBtr0070093	1.74135	TRUE	-0.766667	-0.278762	0.718598	1	0.852888
FBgn0052816	FBtr0273442	1.49417	TRUE	1.26667	0.257874	0.554864	1	0.747887
FBgn0040370	FBtr0070103	0.78103	TRUE	-1.13333	-0.586372	0.598264	1	0.778551
FBgn0040373	FBtr0070107	1.74583	TRUE	-1.03333	-0.203424	0.630943	1	0.798004
FBgn0040373	FBtr0070108	2.72679	TRUE	-3.4	-0.311702	0.0920766	0.609652	0.252294
FBgn0040373	FBtr0340207	1.77381	TRUE	-0.166667	0.00694923	0.937277	1	0.967399
FBgn0000108	FBtr0070109	1.02409	TRUE	1.86667	0.750283	0.362495	1	0.585274
FBgn0025640	FBtr0070115	2.66234	TRUE	2.46667	0.153293	0.225343	1	0.4397
FBgn0025635	FBtr0070116	2.89767	TRUE	-2.16667	-0.147564	0.29067	1	0.516353
FBgn0025635	FBtr0070118	2.19448	TRUE	-0.966667	-0.276491	0.652719	1	0.812666
FBgn0001341	FBtr0070119	2.58862	TRUE	-0.866667	-0.0597855	0.685846	1	0.832863
FBgn0003575	FBtr0070120	2.61377	TRUE	-3.66667	-0.387907	0.0687445	0.481233	0.21376
FBgn0003575	FBtr0340082	1.21089	TRUE	-2.4	-0.934595	0.239806	1	0.457087
FBgn0025634	FBtr0070121	2.66722	TRUE	3.9	0.35774	0.0543577	0.405965	0.188944
FBgn0025638	FBtr0308651	1.56044	TRUE	-4.36667	-1.5423	0.0295395	0.315123	0.145538
FBgn0025638	FBtr0343564	2.0432	TRUE	2.63333	0.700559	0.191429	1	0.3968
FBgn0040383	FBtr0070134	2.10595	TRUE	3.23333	0.307355	0.109258	0.701586	0.280079
FBgn0040382	FBtr0070135	2.35285	TRUE	1.3	0.275708	0.543993	1	0.738593
FBgn0040382	FBtr0070136	2.24749	TRUE	1.33333	0.392329	0.533176	1	0.731002
FBgn0040382	FBtr0070137	2.00516	TRUE	0.833333	0.133943	0.696832	1	0.839464
FBgn0027343	FBtr0345511	1.02839	TRUE	2.9	0.721134	0.150364	0.896714	0.34252
FBgn0025621	FBtr0343325	1.8672	TRUE	-2.9	-0.514681	0.150364	0.896714	0.34252
FBgn0015799	FBtr0070146	3.56319	TRUE	-2.86667	-0.0724465	0.15514	0.916815	0.349361
FBgn0025639	FBtr0308652	1.4103	TRUE	1.1	0.453417	0.609117	1	0.785835
FBgn0002579	FBtr0070155	3.48378	TRUE	1.26667	0.199007	0.554864	1	0.747887
FBgn0002579	FBtr0070156	3.40505	TRUE	-3.8	-0.531504	0.0601753	0.435556	0.199262
FBgn0002579	FBtr0070157	2.45338	TRUE	-2.03333	-0.480707	0.321701	1	0.545053
FBgn0002579	FBtr0070158	1.7552	TRUE	-0.633333	-0.215961	0.764694	1	0.878965
FBgn0002579	FBtr0345321	2.85355	TRUE	-1.36667	-0.485133	0.521694	1	0.721419
FBgn0029529	FBtr0070160	2.27445	TRUE	-1.93333	-0.219137	0.345973	1	0.570134
FBgn0025633	FBtr0110791	1.0991	TRUE	2.6	1.88909	0.197392	1	0.403819
FBgn0025633	FBtr0339430	1.69816	TRUE	0.366667	0.221774	0.866845	1	0.936544
FBgn0025633	FBtr0339431	2.07877	TRUE	3.66667	1.569	0.0687445	0.481233	0.21376
FBgn0025633	FBtr0339432	3.618	TRUE	-4.36667	-0.341605	0.0295395	0.315123	0.145538
FBgn0025633	FBtr0339433	1.55104	TRUE	-4.16667	-3.91856	0.0401399	0.34286	0.165641
FBgn0025633	FBtr0339434	2.03048	TRUE	-1.33333	-0.666243	0.533176	1	0.731002
FBgn0040340	FBtr0070167	2.0822	TRUE	1.96667	0.196046	0.337845	1	0.562225
FBgn0040340	FBtr0070168	2.37702	TRUE	3.46667	0.917884	0.0854786	0.57337	0.240862
FBgn0040340	FBtr0070169	2.22742	TRUE	-0.8	-0.101568	0.70771	1	0.846922
FBgn0040340	FBtr0307182	1.47296	TRUE	-1.16667	-2.99131	0.587287	1	0.770355
FBgn0040340	FBtr0332589	1.97206	TRUE	2.5	1.19758	0.216054	1	0.426048
FBgn0040337	FBtr0070173	2.63521	TRUE	-0.7	-0.00926134	0.741597	1	0.86713
FBgn0040397	FBtr0113327	1.49782	TRUE	0.566667	0.0383599	0.787577	1	0.889779
FBgn0040397	FBtr0331340	2.76916	TRUE	-1.8	-0.131882	0.380296	1	0.602278
FBgn0026143	FBtr0070182	3.53417	TRUE	2.5	0.281488	0.216054	1	0.426048
FBgn0040346	FBtr0070188	3.13964	TRUE	-3.7	-0.196979	0.0663243	0.468147	0.209592
FBgn0052814	FBtr0336688	1.23193	TRUE	2.66667	0.570237	0.185766	1	0.39016
FBgn0040367	FBtr0342728	1.13111	TRUE	-0.1	-0.0731682	0.95995	1	0.975779
FBgn0024362	FBtr0070209	3.43768	TRUE	3.66667	0.17064	0.0687445	0.481233	0.21376
FBgn0024362	FBtr0310619	1.6824	TRUE	3.23333	1.16564	0.109258	0.701586	0.280079
FBgn0024987	FBtr0070215	2.86144	TRUE	-3.33333	-0.219152	0.098773	0.646018	0.263159
FBgn0024987	FBtr0339774	1.73814	TRUE	-1	-0.327645	0.642077	1	0.805973
FBgn0023169	FBtr0070216	3.04423	TRUE	-2.8	-0.113472	0.164674	0.955364	0.362239
FBgn0023169	FBtr0070217	1.93411	TRUE	0.766667	0.182094	0.718598	1	0.852888
FBgn0052813	FBtr0070219	1.01347	TRUE	-1.96667	-0.875446	0.337845	1	0.562225
FBgn0024985	FBtr0070225	3.01319	TRUE	1.9	0.0952394	0.354275	1	0.578465
FBgn0024985	FBtr0332292	1.63842	TRUE	-1.33333	-0.342875	0.533176	1	0.731002
FBgn0027795	FBtr0070231	1.10385	TRUE	-2.7	-0.545841	0.180307	1	0.382835
FBgn0024986	FBtr0070233	2.51509	TRUE	4.16667	0.474162	0.0401399	0.34286	0.165641
FBgn0000826	FBtr0070234	3.18809	TRUE	4.23333	0.332204	0.036661	0.330687	0.158791
FBgn0024365	FBtr0070235	3.05446	TRUE	-3.66667	-0.394551	0.0687445	0.481233	0.21376
FBgn0024365	FBtr0342738	2.42693	TRUE	-3.3	-0.723276	0.102526	0.66612	0.269895
FBgn0024360	FBtr0070237	2.24561	TRUE	-2.6	-0.753856	0.197392	1	0.403819
FBgn0024366	FBtr0342730	1.1494	TRUE	-0.833333	-0.248046	0.696832	1	0.839464
FBgn0025641	FBtr0342731	1.76524	TRUE	-2.8	-0.892987	0.164674	0.955364	0.362239
FBgn0028550	FBtr0070244	1.6334	TRUE	-0.4	0.0088457	0.854289	1	0.929464
FBgn0026876	FBtr0070245	3.34191	TRUE	1.93333	0.150184	0.345973	1	0.570134
FBgn0040366	FBtr0345522	1.89141	TRUE	3.2	0.357742	0.112923	0.720528	0.285479
FBgn0026872	FBtr0339577	1.29658	TRUE	4.4	1.27156	0.0274983	0.315123	0.142102
FBgn0025381	FBtr0339589	1.75916	TRUE	0.133333	0.0919704	0.948347	1	0.97196
FBgn0025394	FBtr0339591	1.49624	TRUE	0.5	0.14619	0.811588	1	0.903562
FBgn0025394	FBtr0339590	2.67684	TRUE	-1.76667	-0.156196	0.389019	1	0.611625
FBgn0000482	FBtr0070269	2.54272	TRUE	-1.5	-0.0768727	0.468146	1	0.672985
FBgn0001189	FBtr0070270	2.12315	TRUE	3.56667	0.425907	0.0760129	0.521059	0.224858
FBgn0001189	FBtr0333115	1.5252	TRUE	-2.36667	-0.624308	0.247291	1	0.465757
FBgn0023130	FBtr0070279	2.79868	TRUE	2.2	0.240232	0.283798	1	0.509645
FBgn0023130	FBtr0330407	1.70195	TRUE	0.9	1.28801	0.67476	1	0.8265
FBgn0023130	FBtr0333116	1.17721	TRUE	1.2	0.77324	0.576327	1	0.762127
FBgn0025390	FBtr0303587	1.17429	TRUE	-3.43333	-0.662575	0.0887891	0.591615	0.246243
FBgn0003517	FBtr0070289	1.68733	TRUE	-0.666667	-0.126847	0.753013	1	0.8724
FBgn0003517	FBtr0070290	3.75228	TRUE	-0.833333	0.509227	0.696832	1	0.839464
FBgn0003517	FBtr0339593	3.6964	TRUE	-2.16667	-0.559615	0.29067	1	0.516353
FBgn0003517	FBtr0339594	2.10675	TRUE	1.46667	0.784259	0.486751	1	0.692916
FBgn0025382	FBtr0070294	2.76089	TRUE	0.766667	0.172559	0.718598	1	0.852888
FBgn0027791	FBtr0070296	2.78932	TRUE	-0.733333	-0.0477911	0.730096	1	0.860178
FBgn0027793	FBtr0070298	1.23289	TRUE	1.3	0.130115	0.543993	1	0.738593
FBgn0026873	FBtr0070308	2.64979	TRUE	0.1	-0.0419681	0.95995	1	0.975779
FBgn0023513	FBtr0339600	1.34775	TRUE	-0.2	0.130328	0.925555	1	0.962172
FBgn0014411	FBtr0070311	3.01073	TRUE	-1.8	-0.0757752	0.380296	1	0.602278
FBgn0029594	FBtr0070313	1.26014	TRUE	2.96667	1.16546	0.14188	0.859681	0.330013
FBgn0023519	FBtr0070314	2.53741	TRUE	4.33333	0.981856	0.031493	0.31661	0.149336
FBgn0023519	FBtr0332579	1.49143	TRUE	-0.0666667	-0.0269191	0.971612	1	0.980736
FBgn0023510	FBtr0070316	3.12736	TRUE	-4.2	-0.603406	0.038417	0.336605	0.161869
FBgn0023510	FBtr0344155	2.07961	TRUE	-2.13333	-0.552842	0.298185	1	0.524191
FBgn0023508	FBtr0070317	3.03258	TRUE	-4.43333	-0.257968	0.0249773	0.315123	0.13639
FBgn0023522	FBtr0070318	2.92153	TRUE	-0.2	-0.00915219	0.925555	1	0.962172
FBgn0023522	FBtr0070319	2.47708	TRUE	-1.7	-0.233896	0.407212	1	0.626966
FBgn0023522	FBtr0332588	1.52331	TRUE	1.33333	0.252414	0.533176	1	0.731002
FBgn0023521	FBtr0070321	2.81123	TRUE	1.13333	0.0168063	0.598264	1	0.778551
FBgn0025630	FBtr0344156	2.34119	TRUE	0.433333	0.0924726	0.842253	1	0.923553
FBgn0025629	FBtr0070331	2.52138	TRUE	-4.43333	-0.422962	0.0249773	0.315123	0.13639
FBgn0025628	FBtr0070334	2.21871	TRUE	-0.233333	-0.229983	0.913762	1	0.957411
FBgn0025628	FBtr0070335	1.23971	TRUE	-2.03333	-0.958796	0.321701	1	0.545053
FBgn0025628	FBtr0300254	1.66801	TRUE	-1.66667	-0.690337	0.416345	1	0.634122
FBgn0025628	FBtr0300255	1.17644	TRUE	1.96667	0.608201	0.337845	1	0.562225
FBgn0025626	FBtr0070339	3.11895	TRUE	2.53333	0.262734	0.209623	1	0.419084
FBgn0000667	FBtr0070345	1.94973	TRUE	-3.93333	-0.873159	0.0524172	0.396459	0.18537
FBgn0000667	FBtr0070344	3.34005	TRUE	-4.36667	-0.257597	0.0295395	0.315123	0.145538
FBgn0003964	FBtr0070346	3.50477	TRUE	-0.166667	-0.0224186	0.937277	1	0.967399
FBgn0003964	FBtr0333803	1.9653	TRUE	0.2	0.184937	0.925555	1	0.962172
FBgn0023545	FBtr0070347	2.91655	TRUE	0.633333	0.013172	0.764694	1	0.878965
FBgn0023520	FBtr0070349	2.49021	TRUE	3.03333	0.236583	0.133245	0.820231	0.316147
FBgn0023512	FBtr0070350	2.23484	TRUE	-4.36667	-4.39555	0.0295395	0.315123	0.145538
FBgn0023512	FBtr0070351	2.92513	TRUE	-2.53333	-0.333463	0.209623	1	0.419084
FBgn0023511	FBtr0070353	2.59907	TRUE	-4.43333	-0.875864	0.0249773	0.315123	0.13639
FBgn0023511	FBtr0070354	2.16465	TRUE	0.1	0.133287	0.95995	1	0.975779
FBgn0023511	FBtr0332580	1.24628	TRUE	-1.66667	-0.810851	0.416345	1	0.634122
FBgn0023511	FBtr0305583	2.01755	TRUE	1.1	0.599227	0.609117	1	0.785835
FBgn0026088	FBtr0070364	2.08581	TRUE	2.03333	0.263599	0.321701	1	0.545053
FBgn0026089	FBtr0070365	2.39249	TRUE	-4.1	-0.356059	0.0432667	0.355167	0.170847
FBgn0026089	FBtr0345510	1.47111	TRUE	3.56667	1.16426	0.0760129	0.521059	0.224858
FBgn0023517	FBtr0070366	3.25976	TRUE	4.46667	0.358305	0.0213808	0.315123	0.126065
FBgn0023517	FBtr0339601	2.65206	TRUE	3.43333	0.496201	0.0887891	0.591615	0.246243
FBgn0023516	FBtr0070368	2.81425	TRUE	4.3	0.345176	0.0332606	0.320779	0.152707
FBgn0023515	FBtr0070369	3.10016	TRUE	-1.5	-0.107516	0.468146	1	0.672985
FBgn0023515	FBtr0070370	2.70492	TRUE	-0.966667	-0.492241	0.652719	1	0.812666
FBgn0023515	FBtr0339494	2.76657	TRUE	-3.16667	-1.16437	0.116728	0.739897	0.291361
FBgn0028969	FBtr0070371	2.66201	TRUE	0.933333	0.157361	0.663567	1	0.819738
FBgn0028969	FBtr0301926	3.01216	TRUE	3.9	0.366009	0.0543577	0.405965	0.188944
FBgn0026090	FBtr0070372	2.26121	TRUE	3.66667	0.473466	0.0687445	0.481233	0.21376
FBgn0026090	FBtr0333511	2.0503	TRUE	3.26667	1.31071	0.105889	0.683942	0.27502
FBgn0025624	FBtr0070375	2.06049	TRUE	2.73333	0.330503	0.175015	0.994865	0.376268
FBgn0040395	FBtr0070376	3.21475	TRUE	0.633333	-0.00069403	0.764694	1	0.878965
FBgn0040395	FBtr0070377	2.0656	TRUE	1.76667	1.19209	0.389019	1	0.611625
FBgn0040395	FBtr0333754	1.41703	TRUE	-4.13333	-1.95802	0.0416099	0.348504	0.168237
FBgn0000382	FBtr0070378	3.47442	TRUE	3.96667	0.176541	0.0502675	0.38619	0.181317
FBgn0000382	FBtr0070379	1.52105	TRUE	0.133333	0.12712	0.948347	1	0.97196
FBgn0023507	FBtr0070381	1.55576	TRUE	-2.9	-0.711924	0.150364	0.896714	0.34252
FBgn0023507	FBtr0070383	1.21529	TRUE	-0.466667	-0.0714446	0.82892	1	0.915104
FBgn0004654	FBtr0331410	3.48642	TRUE	-1.13333	-0.0389872	0.598264	1	0.778551
FBgn0023540	FBtr0310501	2.7035	TRUE	4.03333	0.228069	0.0466018	0.369423	0.176514
FBgn0025839	FBtr0070386	2.70752	TRUE	-4.3	-0.315835	0.0332606	0.320779	0.152707
FBgn0025839	FBtr0343049	1.73615	TRUE	0.8	0.0583097	0.70771	1	0.846922
FBgn0015036	FBtr0070388	1.61561	TRUE	0.733333	0.0618382	0.730096	1	0.860178
FBgn0003116	FBtr0070389	2.68863	TRUE	-1.3	-0.0961511	0.543993	1	0.738593
FBgn0040899	FBtr0070390	2.57004	TRUE	3.9	0.546848	0.0543577	0.405965	0.188944
FBgn0024984	FBtr0070392	2.6346	TRUE	-1.63333	-0.316773	0.426457	1	0.642079
FBgn0023549	FBtr0070393	2.07353	TRUE	1.16667	0.0577453	0.587287	1	0.770355
FBgn0003048	FBtr0332381	0.732037	TRUE	-0.5	0	0.811588	1	0.903562
FBgn0000810	FBtr0070396	2.48135	TRUE	-1.23333	-0.0290404	0.565289	1	0.753969
FBgn0003079	FBtr0070401	3.26042	TRUE	2.16667	0.180999	0.29067	1	0.516353
FBgn0003079	FBtr0344007	1.31658	TRUE	-0.733333	-0.143691	0.730096	1	0.860178
FBgn0003159	FBtr0070402	3.34932	TRUE	-2.5	-0.223193	0.216054	1	0.426048
FBgn0003159	FBtr0070403	1.8009	TRUE	-0.2	-0.114735	0.925555	1	0.962172
FBgn0003159	FBtr0307284	2.46048	TRUE	-4	-0.685709	0.0485185	0.378063	0.179692
FBgn0003159	FBtr0307285	1.20185	TRUE	-1.23333	-0.628162	0.565289	1	0.753969
FBgn0003159	FBtr0343597	1.43633	TRUE	-1.4	-0.796094	0.510577	1	0.712714
FBgn0040389	FBtr0070405	2.48395	TRUE	0.866667	0.13471	0.685846	1	0.832863
FBgn0040389	FBtr0333730	1.61681	TRUE	1.93333	0.912491	0.345973	1	0.570134
FBgn0044047	FBtr0070406	1.23677	TRUE	4.16667	0.757222	0.0401399	0.34286	0.165641
FBgn0040392	FBtr0070407	0.964887	TRUE	-1.16667	-0.389829	0.587287	1	0.770355
FBgn0023526	FBtr0070408	2.9664	TRUE	-0.133333	0.0160347	0.948347	1	0.97196
FBgn0023526	FBtr0332962	2.69114	TRUE	-1.16667	-0.0908054	0.587287	1	0.770355
FBgn0023529	FBtr0070411	3.22967	TRUE	-4.46667	-0.669794	0.0213808	0.315123	0.126065
FBgn0023529	FBtr0300792	3.12323	TRUE	-2.56667	-0.572803	0.203361	1	0.411308
FBgn0023528	FBtr0346648	3.06239	TRUE	0.433333	0.0316226	0.842253	1	0.923553
FBgn0023528	FBtr0300793	2.17405	TRUE	-0.533333	-0.0431292	0.799563	1	0.896621
FBgn0023528	FBtr0345315	3.18667	TRUE	1.93333	0.171323	0.345973	1	0.570134
FBgn0027296	FBtr0070414	2.69075	TRUE	0.0333333	-0.0110585	0.9832	1	0.985701
FBgn0001330	FBtr0070419	2.16114	TRUE	1.43333	1.26455	0.498822	1	0.703402
FBgn0001330	FBtr0342769	2.87637	TRUE	-4.26667	-0.708338	0.0350504	0.325716	0.156184
FBgn0004397	FBtr0070420	3.2504	TRUE	-4.46667	-0.20182	0.0213808	0.315123	0.126065
FBgn0004397	FBtr0342771	1.24675	TRUE	1.9	-0.373367	0.354275	1	0.578465
FBgn0023542	FBtr0070425	2.94092	TRUE	1.83333	0.0704015	0.371615	1	0.594466
FBgn0004655	FBtr0070429	3.08901	TRUE	-1.53333	-0.414507	0.456931	1	0.666513
FBgn0004655	FBtr0070430	3.32483	TRUE	-4.33333	-0.332093	0.031493	0.31661	0.149336
FBgn0004655	FBtr0344159	3.30343	TRUE	-0.833333	-0.144479	0.696832	1	0.839464
FBgn0013432	FBtr0070431	2.29555	TRUE	4.36667	0.824221	0.0295395	0.315123	0.145538
FBgn0004861	FBtr0070432	1.76182	TRUE	-2.5	-0.390661	0.216054	1	0.426048
FBgn0004861	FBtr0301515	1.7087	TRUE	0.133333	0.047397	0.948347	1	0.97196
FBgn0004860	FBtr0070433	2.65671	TRUE	-4.4	-0.688097	0.0274983	0.315123	0.142102
FBgn0004860	FBtr0112843	2.11805	TRUE	0.2	0.0620788	0.925555	1	0.962172
FBgn0040066	FBtr0308566	2.69894	TRUE	4.46667	1.27337	0.0213808	0.315123	0.126065
FBgn0001404	FBtr0070439	3.26623	TRUE	4.36667	0.318839	0.0295395	0.315123	0.145538
FBgn0001404	FBtr0070440	2.29407	TRUE	-1.63333	-0.251595	0.426457	1	0.642079
FBgn0040336	FBtr0070442	2.84216	TRUE	0.133333	0.0198663	0.948347	1	0.97196
FBgn0040334	FBtr0307159	1.96026	TRUE	2.86667	0.27063	0.15514	0.916815	0.349361
FBgn0029629	FBtr0070446	3.31731	TRUE	-4.33333	-0.396035	0.031493	0.31661	0.149336
FBgn0011566	FBtr0070447	2.61169	TRUE	2.46667	0.207154	0.225343	1	0.4397
FBgn0011606	FBtr0070448	2.6758	TRUE	-1.36667	-0.13239	0.521694	1	0.721419
FBgn0040375	FBtr0300707	1.87686	TRUE	-0.0333333	-0.0294427	0.9832	1	0.985701
FBgn0040375	FBtr0308567	2.87516	TRUE	2.5	0.15578	0.216054	1	0.426048
FBgn0040388	FBtr0070457	3.35763	TRUE	-3.36667	-0.247473	0.095198	0.626675	0.256896
FBgn0040388	FBtr0303886	2.14476	TRUE	0.5	0.211605	0.811588	1	0.903562
FBgn0040388	FBtr0303887	2.07259	TRUE	-1.66667	-0.399593	0.416345	1	0.634122
FBgn0040388	FBtr0334883	2.01683	TRUE	0.166667	-0.0460611	0.937277	1	0.967399
FBgn0003714	FBtr0070459	2.53679	TRUE	3.46667	0.442937	0.0854786	0.57337	0.240862
FBgn0001150	FBtr0070460	1.93072	TRUE	1.3	0.613128	0.543993	1	0.738593
FBgn0040385	FBtr0070462	1.2801	TRUE	3.63333	1.43008	0.0710556	0.493826	0.2168
FBgn0003371	FBtr0070471	1.26025	TRUE	-3.06667	-0.78333	0.128922	0.799815	0.309732
FBgn0003371	FBtr0070474	1.77939	TRUE	-2.86667	-0.63133	0.15514	0.916815	0.349361
FBgn0003371	FBtr0070475	2.65551	TRUE	3.06667	0.336227	0.128922	0.799815	0.309732
FBgn0003371	FBtr0070467	2.61218	TRUE	1.86667	0.170216	0.362495	1	0.585274
FBgn0003371	FBtr0070468	2.82382	TRUE	3.8	0.788005	0.0601753	0.435556	0.199262
FBgn0003371	FBtr0070469	1.34542	TRUE	2.1	0.712028	0.305881	1	0.531116
FBgn0003371	FBtr0301966	1.33098	TRUE	1.3	0.836358	0.543993	1	0.738593
FBgn0003371	FBtr0331753	1.66931	TRUE	1.26667	0.119676	0.554864	1	0.747887
FBgn0024993	FBtr0070478	2.68862	TRUE	-1.96667	-0.351312	0.337845	1	0.562225
FBgn0024993	FBtr0345709	2.5581	TRUE	1.6	0.313651	0.436264	1	0.650595
FBgn0024996	FBtr0070479	2.91395	TRUE	-3.83333	-0.146357	0.058058	0.424619	0.195081
FBgn0024991	FBtr0070481	2.51689	TRUE	0.766667	0.183023	0.718598	1	0.852888
FBgn0024991	FBtr0070482	2.76173	TRUE	0.966667	0.060339	0.652719	1	0.812666
FBgn0024991	FBtr0310649	3.01785	TRUE	-2.13333	-0.163506	0.298185	1	0.524191
FBgn0000928	FBtr0070484	1.41446	TRUE	-2.1	-0.48325	0.305881	1	0.531116
FBgn0000927	FBtr0070485	3.6668	TRUE	-3.93333	-0.296947	0.0524172	0.396459	0.18537
FBgn0000520	FBtr0070487	2.93261	TRUE	-1.36667	-0.107197	0.521694	1	0.721419
FBgn0024975	FBtr0070488	2.6872	TRUE	4.1	0.372736	0.0432667	0.355167	0.170847
FBgn0003996	FBtr0070490	1.98498	TRUE	-1.56667	-0.13159	0.446054	1	0.65743
FBgn0040384	FBtr0070491	3.22313	TRUE	1.2	0.0413337	0.576327	1	0.762127
FBgn0040384	FBtr0070492	1.91322	TRUE	-0.566667	-0.213791	0.787577	1	0.889779
FBgn0040384	FBtr0070493	2.55652	TRUE	1.8	0.394377	0.380296	1	0.602278
FBgn0040384	FBtr0345318	0.929156	TRUE	-0.166667	0	0.937277	1	0.967399
FBgn0000376	FBtr0070496	2.36367	TRUE	-1.03333	-0.112762	0.630943	1	0.798004
FBgn0024994	FBtr0273276	1.05891	TRUE	0.566667	0.192068	0.787577	1	0.889779
FBgn0024992	FBtr0345716	1.06746	TRUE	-2.7	-0.965583	0.180307	1	0.382835
FBgn0004647	FBtr0070507	2.69066	TRUE	-1.36667	-0.299061	0.521694	1	0.721419
FBgn0000479	FBtr0070518	1.86698	TRUE	0.3	0.358804	0.890532	1	0.946877
FBgn0000479	FBtr0070519	1.62881	TRUE	-4	-0.831423	0.0485185	0.378063	0.179692
FBgn0000479	FBtr0070520	2.40181	TRUE	-0.433333	-0.0959475	0.842253	1	0.923553
FBgn0000479	FBtr0333313	2.56104	TRUE	-2.7	-0.22874	0.180307	1	0.382835
FBgn0000479	FBtr0333314	1.56397	TRUE	-1.43333	-0.33339	0.498822	1	0.703402
FBgn0028746	FBtr0070543	2.12841	TRUE	4.36667	0.666653	0.0295395	0.315123	0.145538
FBgn0028746	FBtr0345708	1.61973	TRUE	4.1	1.34545	0.0432667	0.355167	0.170847
FBgn0029648	FBtr0070558	2.05293	TRUE	-0.966667	-0.418554	0.652719	1	0.812666
FBgn0029648	FBtr0332493	2.36049	TRUE	3.93333	0.57507	0.0524172	0.396459	0.18537
FBgn0028369	FBtr0070560	1.93708	TRUE	-1.43333	-0.524599	0.498822	1	0.703402
FBgn0028369	FBtr0309498	1.37937	TRUE	1.63333	1.51191	0.426457	1	0.642079
FBgn0028369	FBtr0309501	1.47219	TRUE	-2.8	-0.728579	0.164674	0.955364	0.362239
FBgn0029664	FBtr0070568	2.9729	TRUE	-3.26667	-0.265763	0.105889	0.683942	0.27502
FBgn0029664	FBtr0331609	1.52601	TRUE	-0.5	-0.454623	0.811588	1	0.903562
FBgn0029666	FBtr0070569	3.15466	TRUE	-4.06667	-0.222265	0.0448951	0.361995	0.174106
FBgn0029666	FBtr0331610	1.5553	TRUE	0.666667	0.410799	0.753013	1	0.8724
FBgn0029666	FBtr0331611	1.85924	TRUE	-2.3	-0.571784	0.261778	1	0.483314
FBgn0029666	FBtr0332285	2.43539	TRUE	-1.03333	-0.077834	0.630943	1	0.798004
FBgn0023215	FBtr0307277	2.22532	TRUE	-0.133333	0.00627016	0.948347	1	0.97196
FBgn0023215	FBtr0307278	1.73272	TRUE	-0.766667	-0.284965	0.718598	1	0.852888
FBgn0023215	FBtr0301821	2.34735	TRUE	1.93333	0.65815	0.345973	1	0.570134
FBgn0023215	FBtr0301823	3.0072	TRUE	-1.56667	-0.105579	0.446054	1	0.65743
FBgn0023215	FBtr0301824	2.88074	TRUE	-4.13333	-0.756447	0.0416099	0.348504	0.168237
FBgn0015286	FBtr0070582	2.38208	TRUE	3.7	0.573674	0.0663243	0.468147	0.209592
FBgn0015286	FBtr0070583	2.22438	TRUE	1.06667	0.198394	0.620082	1	0.791891
FBgn0015286	FBtr0070584	3.39653	TRUE	3.56667	0.25468	0.0760129	0.521059	0.224858
FBgn0023216	FBtr0307279	2.59923	TRUE	-3.5	-1.12686	0.0814123	0.550895	0.233605
FBgn0023216	FBtr0307280	2.60185	TRUE	-0.7	-0.0645152	0.741597	1	0.86713
FBgn0029672	FBtr0070586	2.87941	TRUE	4.1	0.249554	0.0432667	0.355167	0.170847
FBgn0029672	FBtr0333793	1.93688	TRUE	-0.0666667	-0.0513213	0.971612	1	0.980736
FBgn0052791	FBtr0333794	1.47017	TRUE	-3.96667	-0.699639	0.0502675	0.38619	0.181317
FBgn0052791	FBtr0333795	1.33548	TRUE	-3.26667	-0.56038	0.105889	0.683942	0.27502
FBgn0029665	FBtr0070590	2.8443	TRUE	-3.6	-0.319959	0.0734997	0.507222	0.220584
FBgn0028491	FBtr0070610	1.34437	TRUE	0.566667	0.23064	0.787577	1	0.889779
FBgn0029686	FBtr0070613	2.92366	TRUE	-4.46667	-0.336505	0.0213808	0.315123	0.126065
FBgn0029686	FBtr0345711	1.58877	TRUE	0.266667	0.0289902	0.902344	1	0.952894
FBgn0052786	FBtr0344825	2.16173	TRUE	-1.66667	-0.25882	0.416345	1	0.634122
FBgn0052783	FBtr0344826	1.70788	TRUE	0.6	0.125852	0.776184	1	0.885055
FBgn0029687	FBtr0070616	3.47022	TRUE	-3.03333	-0.10851	0.133245	0.820231	0.316147
FBgn0029687	FBtr0342739	1.73116	TRUE	-0.233333	-0.0698398	0.913762	1	0.957411
FBgn0029689	FBtr0070625	2.82874	TRUE	-2.5	-0.208762	0.216054	1	0.426048
FBgn0029688	FBtr0070626	3.02376	TRUE	-4.43333	-0.995635	0.0249773	0.315123	0.13639
FBgn0029688	FBtr0342740	2.83039	TRUE	-3.33333	-0.62449	0.098773	0.646018	0.263159
FBgn0029685	FBtr0070627	3.19525	TRUE	-4.33333	-0.247034	0.031493	0.31661	0.149336
FBgn0029685	FBtr0332387	1.84376	TRUE	-1.23333	-0.172162	0.565289	1	0.753969
FBgn0000221	FBtr0070638	2.43733	TRUE	4.3	0.396349	0.0332606	0.320779	0.152707
FBgn0026084	FBtr0070641	2.5483	TRUE	1.56667	0.11219	0.446054	1	0.65743
FBgn0026085	FBtr0333183	1.7926	TRUE	3	0.616422	0.137623	0.840454	0.323524
FBgn0026083	FBtr0070643	2.55921	TRUE	-0.433333	-0.0191923	0.842253	1	0.923553
FBgn0026083	FBtr0300931	2.37538	TRUE	-4.13333	-0.941295	0.0416099	0.348504	0.168237
FBgn0026083	FBtr0301124	2.16316	TRUE	2.2	0.851714	0.283798	1	0.509645
FBgn0026083	FBtr0305179	2.58566	TRUE	-2.73333	-0.728125	0.175015	0.994865	0.376268
FBgn0026083	FBtr0305180	2.23185	TRUE	-0.1	-0.181014	0.95995	1	0.975779
FBgn0026083	FBtr0305181	2.60461	TRUE	-0.966667	-0.144594	0.652719	1	0.812666
FBgn0026083	FBtr0305182	2.4527	TRUE	3.1	0.527642	0.124869	0.780276	0.303186
FBgn0026083	FBtr0305183	2.31573	TRUE	-2.76667	-0.413679	0.169586	0.974418	0.368863
FBgn0026083	FBtr0305184	2.7082	TRUE	0.433333	0.286113	0.842253	1	0.923553
FBgn0040907	FBtr0070655	2.2295	TRUE	-2.83333	-0.307795	0.159623	0.935197	0.355029
FBgn0002707	FBtr0343574	2.80045	TRUE	-4.36667	-0.343115	0.0295395	0.315123	0.145538
FBgn0026080	FBtr0070668	1.74699	TRUE	-0.833333	-0.11363	0.696832	1	0.839464
FBgn0026080	FBtr0333186	2.74649	TRUE	3.66667	0.171822	0.0687445	0.481233	0.21376
FBgn0026079	FBtr0070669	2.73376	TRUE	-4.26667	-0.338361	0.0350504	0.325716	0.156184
FBgn0004832	FBtr0070670	2.47866	TRUE	1.36667	0.121592	0.521694	1	0.721419
FBgn0029693	FBtr0070671	2.86228	TRUE	-3.06667	-0.238121	0.128922	0.799815	0.309732
FBgn0029710	FBtr0070676	1.51142	TRUE	2.1	0.315379	0.305881	1	0.531116
FBgn0029712	FBtr0070677	2.10565	TRUE	2.4	0.149618	0.239806	1	0.457087
FBgn0029714	FBtr0070678	2.81427	TRUE	4.23333	0.309829	0.036661	0.330687	0.158791
FBgn0022768	FBtr0343531	2.96059	TRUE	-1.4	-0.251281	0.510577	1	0.712714
FBgn0029715	FBtr0070698	3.38981	TRUE	-2.1	-0.265629	0.305881	1	0.531116
FBgn0029713	FBtr0070699	2.91406	TRUE	2.8	0.187602	0.164674	0.955364	0.362239
FBgn0029711	FBtr0070701	2.83409	TRUE	3.66667	0.229603	0.0687445	0.481233	0.21376
FBgn0029711	FBtr0308917	2.10168	TRUE	-2.4	-0.363893	0.239806	1	0.457087
FBgn0003210	FBtr0070702	2.40838	TRUE	0.566667	0.123791	0.787577	1	0.889779
FBgn0003210	FBtr0332290	1.21161	TRUE	1.43333	0.665286	0.498822	1	0.703402
FBgn0011760	FBtr0070707	1.4634	TRUE	-1.7	-0.282128	0.407212	1	0.626966
FBgn0028325	FBtr0070711	1.994	TRUE	0.633333	0.172377	0.764694	1	0.878965
FBgn0052772	FBtr0300997	2.88646	TRUE	4.1	0.359629	0.0432667	0.355167	0.170847
FBgn0052772	FBtr0342951	1.83601	TRUE	1.56667	3.044	0.446054	1	0.65743
FBgn0052772	FBtr0342952	2.16891	TRUE	1.16667	0.308092	0.587287	1	0.770355
FBgn0052772	FBtr0343533	2.74459	TRUE	-3.7	-0.467112	0.0663243	0.468147	0.209592
FBgn0029737	FBtr0070723	2.72164	TRUE	0.4	0.0037601	0.854289	1	0.929464
FBgn0029737	FBtr0343535	2.66119	TRUE	-2.03333	-0.293068	0.321701	1	0.545053
FBgn0004368	FBtr0070724	2.80507	TRUE	-3.7	-0.566619	0.0663243	0.468147	0.209592
FBgn0004368	FBtr0301793	2.29049	TRUE	-1.03333	-0.13447	0.630943	1	0.798004
FBgn0004368	FBtr0301794	1.73943	TRUE	-2.9	-1.5184	0.150364	0.896714	0.34252
FBgn0004368	FBtr0343529	1.3496	TRUE	-1.46667	-0.380222	0.486751	1	0.692916
FBgn0011761	FBtr0345745	1.30146	TRUE	2.96667	1.03609	0.14188	0.859681	0.330013
FBgn0029753	FBtr0070750	1.26619	TRUE	-1.06667	-0.535231	0.620082	1	0.791891
FBgn0029753	FBtr0340475	1.18254	TRUE	2.23333	1.44457	0.276604	1	0.501434
FBgn0014024	FBtr0070752	2.24739	TRUE	-1.33333	-0.262055	0.533176	1	0.731002
FBgn0014024	FBtr0340477	2.99063	TRUE	-4.43333	-0.859896	0.0249773	0.315123	0.13639
FBgn0029750	FBtr0070758	1.40627	TRUE	-2.06667	-0.353368	0.313543	1	0.538029
FBgn0052767	FBtr0300994	2.30133	TRUE	-4.33333	-1.78692	0.031493	0.31661	0.149336
FBgn0052767	FBtr0300995	2.86996	TRUE	0.0666667	0.0341349	0.971612	1	0.980736
FBgn0052767	FBtr0302119	2.39428	TRUE	-1.96667	-0.606624	0.337845	1	0.562225
FBgn0052767	FBtr0331757	2.18962	TRUE	-3.56667	-1.44891	0.0760129	0.521059	0.224858
FBgn0052767	FBtr0331758	1.33127	TRUE	0.866667	0.340139	0.685846	1	0.832863
FBgn0029763	FBtr0070772	2.49209	TRUE	-4.43333	-2.08004	0.0249773	0.315123	0.13639
FBgn0029763	FBtr0070775	2.92415	TRUE	-1.76667	-0.307081	0.389019	1	0.611625
FBgn0029763	FBtr0340461	1.87774	TRUE	3.06667	1.80273	0.128922	0.799815	0.309732
FBgn0029763	FBtr0340462	3.23419	TRUE	-3.6	-0.379078	0.0734997	0.507222	0.220584
FBgn0029766	FBtr0070777	1.20758	TRUE	1.36667	0.273443	0.521694	1	0.721419
FBgn0029771	FBtr0070780	1.29982	TRUE	2.46667	0.32328	0.225343	1	0.4397
FBgn0004687	FBtr0070783	2.93968	TRUE	-3.1	-0.24711	0.124869	0.780276	0.303186
FBgn0029778	FBtr0070784	1.61851	TRUE	0.4	-1.34893	0.854289	1	0.929464
FBgn0029778	FBtr0070785	2.77199	TRUE	-1.3	-0.0979446	0.543993	1	0.738593
FBgn0029756	FBtr0070798	2.91478	TRUE	4.46667	0.65435	0.0213808	0.315123	0.126065
FBgn0029756	FBtr0344827	1.84337	TRUE	2.03333	1.0103	0.321701	1	0.545053
FBgn0028474	FBtr0070799	2.81259	TRUE	-1.63333	-0.180464	0.426457	1	0.642079
FBgn0028474	FBtr0340463	3.0572	TRUE	-4	-0.393403	0.0485185	0.378063	0.179692
FBgn0029785	FBtr0070800	3.04616	TRUE	1.53333	0.510969	0.456931	1	0.666513
FBgn0029785	FBtr0070801	4.12316	TRUE	-0.5	-0.0579203	0.811588	1	0.903562
FBgn0029785	FBtr0345788	1.71268	TRUE	3.33333	1.14884	0.098773	0.646018	0.263159
FBgn0000394	FBtr0070804	1.62545	TRUE	3.86667	0.948059	0.0562328	0.415339	0.192125
FBgn0000394	FBtr0340464	2.09074	TRUE	3.16667	0.528066	0.116728	0.739897	0.291361
FBgn0000394	FBtr0340465	2.23334	TRUE	-1.7	-0.273213	0.407212	1	0.626966
FBgn0029798	FBtr0070807	2.90245	TRUE	-2.83333	-0.152589	0.159623	0.935197	0.355029
FBgn0029798	FBtr0332398	1.70491	TRUE	-0.933333	-0.543445	0.663567	1	0.819738
FBgn0029801	FBtr0070809	3.26679	TRUE	-1.2	-0.0228392	0.576327	1	0.762127
FBgn0029801	FBtr0345789	2.04219	TRUE	3.36667	1.15505	0.095198	0.626675	0.256896
FBgn0029820	FBtr0070821	2.3628	TRUE	-2.03333	-0.300629	0.321701	1	0.545053
FBgn0029821	FBtr0070824	0.678492	TRUE	1.93333	1.0304	0.345973	1	0.570134
FBgn0029821	FBtr0333800	1.35949	TRUE	-0.2	-0.23708	0.925555	1	0.962172
FBgn0029822	FBtr0070825	2.41025	TRUE	3.86667	0.492945	0.0562328	0.415339	0.192125
FBgn0029823	FBtr0070827	2.38474	TRUE	-1.76667	-0.152635	0.389019	1	0.611625
FBgn0029823	FBtr0345317	3.06794	TRUE	2.93333	0.136683	0.145937	0.877602	0.336441
FBgn0029819	FBtr0070828	1.10366	TRUE	3.4	1.42109	0.0920766	0.609652	0.252294
FBgn0029819	FBtr0343537	3.24156	TRUE	-3.96667	-0.194892	0.0502675	0.38619	0.181317
FBgn0014340	FBtr0070829	2.75208	TRUE	-4.4	-0.680663	0.0274983	0.315123	0.142102
FBgn0029818	FBtr0070830	3.24802	TRUE	-3.63333	-0.353365	0.0710556	0.493826	0.2168
FBgn0029813	FBtr0070832	1.25592	TRUE	-2.4	-0.325063	0.239806	1	0.457087
FBgn0029804	FBtr0070836	1.06108	TRUE	0.233333	0.017027	0.913762	1	0.957411
FBgn0013987	FBtr0070837	2.47975	TRUE	-1.56667	-0.315863	0.446054	1	0.65743
FBgn0013987	FBtr0070839	2.07424	TRUE	-2.6	-1.01139	0.197392	1	0.403819
FBgn0013987	FBtr0308577	2.60738	TRUE	-1.33333	-0.522138	0.533176	1	0.731002
FBgn0029800	FBtr0339744	1.79033	TRUE	0.9	0.0661925	0.67476	1	0.8265
FBgn0261383	FBtr0070841	1.7534	TRUE	1.8	1.10033	0.380296	1	0.602278
FBgn0261383	FBtr0070842	2.36886	TRUE	2.93333	1.37753	0.145937	0.877602	0.336441
FBgn0261383	FBtr0332399	2.84264	TRUE	-2.8	-0.312453	0.164674	0.955364	0.362239
FBgn0261383	FBtr0332400	2.99402	TRUE	3.03333	0.479414	0.133245	0.820231	0.316147
FBgn0261383	FBtr0332401	1.61592	TRUE	-2.1	-0.759418	0.305881	1	0.531116
FBgn0052758	FBtr0070843	3.1847	TRUE	-1.86667	-0.166338	0.362495	1	0.585274
FBgn0052758	FBtr0339525	1.87689	TRUE	1.36667	0.510948	0.521694	1	0.721419
FBgn0027564	FBtr0070846	2.40032	TRUE	1.83333	0.306809	0.371615	1	0.594466
FBgn0029789	FBtr0070847	3.05622	TRUE	-3.6	-0.330956	0.0734997	0.507222	0.220584
FBgn0046687	FBtr0070848	2.9098	TRUE	-0.5	-0.034709	0.811588	1	0.903562
FBgn0015794	FBtr0070849	2.63593	TRUE	-2.66667	-0.132598	0.185766	1	0.39016
FBgn0029783	FBtr0070852	2.27031	TRUE	0.833333	0.0391127	0.696832	1	0.839464
FBgn0029824	FBtr0070858	2.42741	TRUE	-2.26667	-0.763066	0.26933	1	0.49271
FBgn0029824	FBtr0343051	2.59147	TRUE	1.93333	0.385491	0.345973	1	0.570134
FBgn0029825	FBtr0070859	2.74124	TRUE	-0.766667	-0.0405379	0.718598	1	0.852888
FBgn0029825	FBtr0343052	2.43658	TRUE	-1.46667	-0.150953	0.486751	1	0.692916
FBgn0052756	FBtr0070860	2.85233	TRUE	-3.56667	-0.232772	0.0760129	0.521059	0.224858
FBgn0029830	FBtr0070865	1.81617	TRUE	-1.63333	-0.434827	0.426457	1	0.642079
FBgn0029830	FBtr0343414	1.84161	TRUE	-3.26667	-0.939152	0.105889	0.683942	0.27502
FBgn0029831	FBtr0070866	3.17209	TRUE	2.5	0.363787	0.216054	1	0.426048
FBgn0029833	FBtr0070867	2.21662	TRUE	1.6	0.180129	0.436264	1	0.650595
FBgn0029833	FBtr0305344	2.60261	TRUE	2.93333	0.508067	0.145937	0.877602	0.336441
FBgn0003514	FBtr0070877	2.82365	TRUE	-3.1	-0.233059	0.124869	0.780276	0.303186
FBgn0029840	FBtr0332964	3.63979	TRUE	-1.83333	-0.24787	0.371615	1	0.594466
FBgn0029840	FBtr0345895	2.84151	TRUE	1.26667	1.1054	0.554864	1	0.747887
FBgn0003302	FBtr0070889	2.08132	TRUE	3.73333	1.6664	0.0641639	0.456575	0.20663
FBgn0003302	FBtr0307288	2.66445	TRUE	4.36667	0.730467	0.0295395	0.315123	0.145538
FBgn0015818	FBtr0070894	2.81409	TRUE	-4.4	-0.393819	0.0274983	0.315123	0.142102
FBgn0029853	FBtr0070895	2.05394	TRUE	-1.7	-0.115134	0.407212	1	0.626966
FBgn0028982	FBtr0070896	2.63896	TRUE	2.16667	0.719829	0.29067	1	0.516353
FBgn0029858	FBtr0070898	2.65459	TRUE	-1.13333	-0.0472716	0.598264	1	0.778551
FBgn0029861	FBtr0070899	3.25988	TRUE	0.833333	0.0391999	0.696832	1	0.839464
FBgn0029866	FBtr0070904	2.88007	TRUE	2.8	0.187942	0.164674	0.955364	0.362239
FBgn0029866	FBtr0331394	2.24276	TRUE	-0.233333	0.00579097	0.913762	1	0.957411
FBgn0029873	FBtr0070912	2.76466	TRUE	0.966667	0.0745223	0.652719	1	0.812666
FBgn0000524	FBtr0070914	3.57717	TRUE	-2.5	-0.143229	0.216054	1	0.426048
FBgn0014026	FBtr0070915	3.52344	TRUE	4.36667	1.32888	0.0295395	0.315123	0.145538
FBgn0014026	FBtr0070916	2.40074	TRUE	2.66667	0.557937	0.185766	1	0.39016
FBgn0014026	FBtr0343329	3.17477	TRUE	-3.86667	-0.387444	0.0562328	0.415339	0.192125
FBgn0029874	FBtr0070918	2.5387	TRUE	-4.33333	-0.367724	0.031493	0.31661	0.149336
FBgn0003139	FBtr0070921	3.25658	TRUE	-1.56667	-0.182981	0.446054	1	0.65743
FBgn0003139	FBtr0331430	1.53723	TRUE	-0.666667	0.191534	0.753013	1	0.8724
FBgn0003139	FBtr0331432	2.72173	TRUE	-2.83333	-0.92485	0.159623	0.935197	0.355029
FBgn0003655	FBtr0070922	3.79972	TRUE	1.5	0.118756	0.468146	1	0.672985
FBgn0029868	FBtr0070924	1.65451	TRUE	3.86667	2.31013	0.0562328	0.415339	0.192125
FBgn0029868	FBtr0340026	2.84318	TRUE	4.33333	0.473211	0.031493	0.31661	0.149336
FBgn0029868	FBtr0347282	1.30194	TRUE	-3.66667	-1.45651	0.0687445	0.481233	0.21376
FBgn0043796	FBtr0070925	2.9771	TRUE	0.0333333	0.024102	0.9832	1	0.985701
FBgn0028685	FBtr0305495	3.20461	TRUE	1.4	0.0961916	0.510577	1	0.712714
FBgn0026015	FBtr0070930	3.2816	TRUE	-1.2	-0.0564432	0.576327	1	0.762127
FBgn0026015	FBtr0340028	2.79571	TRUE	-1.26667	-0.470134	0.554864	1	0.747887
FBgn0010583	FBtr0078013	2.50564	TRUE	3.3	0.878749	0.102526	0.66612	0.269895
FBgn0010583	FBtr0078015	2.61272	TRUE	-2.76667	-0.523558	0.169586	0.974418	0.368863
FBgn0010583	FBtr0332973	3.0638	TRUE	-0.4	-0.0323824	0.854289	1	0.929464
FBgn0020545	FBtr0078016	2.08029	TRUE	1	0.444714	0.642077	1	0.805973
FBgn0020545	FBtr0334794	3.07827	TRUE	4.46667	0.70175	0.0213808	0.315123	0.126065
FBgn0020305	FBtr0078030	2.84755	TRUE	-3.13333	-0.163147	0.120604	0.759309	0.296093
FBgn0029095	FBtr0078031	2.13772	TRUE	-2.46667	-0.309136	0.225343	1	0.4397
FBgn0029095	FBtr0078032	1.60277	TRUE	-2.46667	-0.851637	0.225343	1	0.4397
FBgn0031287	FBtr0078034	2.44739	TRUE	-2.2	-0.313951	0.283798	1	0.509645
FBgn0031287	FBtr0334797	1.97561	TRUE	2.13333	0.854677	0.298185	1	0.524191
FBgn0020304	FBtr0302612	3.07637	TRUE	3.96667	0.571467	0.0502675	0.38619	0.181317
FBgn0020304	FBtr0334763	3.01257	TRUE	-4.33333	-0.437341	0.031493	0.31661	0.149336
FBgn0031286	FBtr0078038	2.34997	TRUE	-0.366667	0.0230945	0.866845	1	0.936544
FBgn0031281	FBtr0078041	2.68004	TRUE	-4.46667	-0.580678	0.0213808	0.315123	0.126065
FBgn0031281	FBtr0332974	1.75693	TRUE	-1.5	-0.391687	0.468146	1	0.672985
FBgn0004611	FBtr0078047	2.52233	TRUE	-4	-0.745019	0.0485185	0.378063	0.179692
FBgn0002593	FBtr0078056	3.67114	TRUE	-1.8	-0.155927	0.380296	1	0.602278
FBgn0002593	FBtr0331932	2.14685	TRUE	-0.433333	-0.0775587	0.842253	1	0.923553
FBgn0004583	FBtr0078059	1.88001	TRUE	-4.43333	-0.831559	0.0249773	0.315123	0.13639
FBgn0027592	FBtr0078062	2.78118	TRUE	-4.46667	-0.521878	0.0213808	0.315123	0.126065
FBgn0003963	FBtr0078063	1.5348	TRUE	-3.3	-1.09198	0.102526	0.66612	0.269895
FBgn0003963	FBtr0310027	1.50343	TRUE	0.233333	-0.0316323	0.913762	1	0.957411
FBgn0003963	FBtr0333012	1.27439	TRUE	0.7	1.38943	0.741597	1	0.86713
FBgn0003963	FBtr0333013	1.43685	TRUE	-2.13333	-0.587573	0.298185	1	0.524191
FBgn0031266	FBtr0332340	1.76916	TRUE	0.0666667	0.833556	0.971612	1	0.980736
FBgn0031268	FBtr0078069	2.60775	TRUE	1.8	0.115074	0.380296	1	0.602278
FBgn0031260	FBtr0078080	3.10881	TRUE	3.73333	0.230951	0.0641639	0.456575	0.20663
FBgn0010602	FBtr0078081	3.3273	TRUE	1.6	0.191386	0.436264	1	0.650595
FBgn0010602	FBtr0310028	1.11956	TRUE	-0.466667	-0.0873106	0.82892	1	0.915104
FBgn0010602	FBtr0310029	1.66158	TRUE	0.966667	0.267791	0.652719	1	0.812666
FBgn0031258	FBtr0310034	1.79935	TRUE	-2.46667	-0.332691	0.225343	1	0.4397
FBgn0015924	FBtr0078087	3.28015	TRUE	-3.83333	-0.21326	0.058058	0.424619	0.195081
FBgn0015924	FBtr0331232	3.26195	TRUE	1.16667	-0.00209045	0.587287	1	0.770355
FBgn0031253	FBtr0078089	1.99285	TRUE	0.4	0.106738	0.854289	1	0.929464
FBgn0031250	FBtr0078094	2.88599	TRUE	2.03333	0.202851	0.321701	1	0.545053
FBgn0031250	FBtr0078095	1.80042	TRUE	0.833333	0.261821	0.696832	1	0.839464
FBgn0031250	FBtr0330651	2.22489	TRUE	1.03333	0.187012	0.630943	1	0.798004
FBgn0067779	FBtr0078100	2.74659	TRUE	4.13333	0.633592	0.0416099	0.348504	0.168237
FBgn0067779	FBtr0306536	1.62066	TRUE	-1.36667	-3.99376	0.521694	1	0.721419
FBgn0067779	FBtr0306537	2.16383	TRUE	-0.533333	-0.132595	0.799563	1	0.896621
FBgn0067779	FBtr0306538	1.40927	TRUE	1.03333	0.880669	0.630943	1	0.798004
FBgn0031213	FBtr0078101	2.33391	TRUE	2.1	0.215103	0.305881	1	0.531116
FBgn0031213	FBtr0301733	2.72133	TRUE	1.26667	0.075189	0.554864	1	0.747887
FBgn0031213	FBtr0302164	2.56331	TRUE	1.23333	0.106712	0.565289	1	0.753969
FBgn0031213	FBtr0306540	1.21822	TRUE	4.46667	2.52514	0.0213808	0.315123	0.126065
FBgn0031213	FBtr0331680	1.38308	TRUE	-0.766667	-0.26518	0.718598	1	0.852888
FBgn0031217	FBtr0078104	3.22968	TRUE	0.2	-4.06997e-05	0.925555	1	0.962172
FBgn0031217	FBtr0330636	1.5517	TRUE	1.3	0.303563	0.543993	1	0.738593
FBgn0001142	FBtr0078115	2.00974	TRUE	2.46667	0.533666	0.225343	1	0.4397
FBgn0001142	FBtr0078114	3.60937	TRUE	0.133333	-0.00517257	0.948347	1	0.97196
FBgn0031224	FBtr0078116	2.46435	TRUE	-3.96667	-0.33874	0.0502675	0.38619	0.181317
FBgn0031228	FBtr0078117	2.16676	TRUE	-1.56667	-0.430575	0.446054	1	0.65743
FBgn0031228	FBtr0078118	2.11485	TRUE	-3.1	-0.338249	0.124869	0.780276	0.303186
FBgn0031228	FBtr0301887	1.36841	TRUE	-2.13333	-0.756007	0.298185	1	0.524191
FBgn0031228	FBtr0306542	1.83187	TRUE	-2.96667	-0.466463	0.14188	0.859681	0.330013
FBgn0031228	FBtr0330639	1.50507	TRUE	0.366667	0.0542377	0.866845	1	0.936544
FBgn0031229	FBtr0078119	3.27614	TRUE	0.4	-0.0140323	0.854289	1	0.929464
FBgn0031229	FBtr0340650	1.2894	TRUE	0.933333	1.17221	0.663567	1	0.819738
FBgn0031233	FBtr0078125	2.94118	TRUE	1.4	0.0558032	0.510577	1	0.712714
FBgn0031233	FBtr0332338	1.26016	TRUE	3.83333	2.04618	0.058058	0.424619	0.195081
FBgn0003444	FBtr0078129	3.27179	TRUE	-4.33333	-0.225761	0.031493	0.31661	0.149336
FBgn0017457	FBtr0078133	2.90691	TRUE	0.9	0.0727988	0.67476	1	0.8265
FBgn0017457	FBtr0333408	1.87222	TRUE	1.23333	0.522665	0.565289	1	0.753969
FBgn0031245	FBtr0078136	1.78332	TRUE	0.133333	0.040039	0.948347	1	0.97196
FBgn0031244	FBtr0078137	1.51236	TRUE	-1.5	-0.189609	0.468146	1	0.672985
FBgn0031244	FBtr0343779	2.36638	TRUE	2.33333	0.265691	0.254739	1	0.475788
FBgn0031244	FBtr0343780	2.08367	TRUE	-1.6	-0.298806	0.436264	1	0.650595
FBgn0031238	FBtr0078140	2.488	TRUE	-1.96667	-0.160584	0.337845	1	0.562225
FBgn0031238	FBtr0078141	1.58093	TRUE	2.66667	1.4944	0.185766	1	0.39016
FBgn0031239	FBtr0308252	1.1494	TRUE	-2.06667	-0.420038	0.313543	1	0.538029
FBgn0031227	FBtr0078147	2.75104	TRUE	1.53333	0.102083	0.456931	1	0.666513
FBgn0026787	FBtr0301452	2.88302	TRUE	-3.13333	-0.196545	0.120604	0.759309	0.296093
FBgn0002931	FBtr0290323	1.64441	TRUE	-4.36667	-0.966074	0.0295395	0.315123	0.145538
FBgn0051973	FBtr0309227	0.94741	TRUE	-1.56667	-0.480419	0.446054	1	0.65743
FBgn0002121	FBtr0078166	2.71016	TRUE	-2.53333	-0.527462	0.209623	1	0.419084
FBgn0002121	FBtr0078167	2.17351	TRUE	-0.666667	0.0204844	0.753013	1	0.8724
FBgn0002121	FBtr0078168	2.09849	TRUE	-0.0333333	-0.166748	0.9832	1	0.985701
FBgn0002121	FBtr0078170	3.47534	TRUE	-4.03333	-0.365479	0.0466018	0.369423	0.176514
FBgn0002121	FBtr0078171	1.6728	TRUE	0.2	0.323038	0.925555	1	0.962172
FBgn0002121	FBtr0306590	2.27454	TRUE	-2.03333	-0.440727	0.321701	1	0.545053
FBgn0002121	FBtr0306591	2.8429	TRUE	-2.86667	-0.397934	0.15514	0.916815	0.349361
FBgn0002121	FBtr0306592	1.11695	TRUE	1	0.33432	0.642077	1	0.805973
FBgn0002121	FBtr0330655	1.5651	TRUE	-0.3	1.64449	0.890532	1	0.946877
FBgn0036974	FBtr0078173	2.81735	TRUE	-1.23333	0.893697	0.565289	1	0.753969
FBgn0036974	FBtr0078174	2.30891	TRUE	0.866667	0.477033	0.685846	1	0.832863
FBgn0036974	FBtr0078175	1.95426	TRUE	-0.233333	0.0574313	0.913762	1	0.957411
FBgn0036974	FBtr0078176	2.00856	TRUE	0.5	0.306099	0.811588	1	0.903562
FBgn0036974	FBtr0078177	1.01341	TRUE	-4.3	-1.71355	0.0332606	0.320779	0.152707
FBgn0036974	FBtr0078178	3.56364	TRUE	-3.83333	-0.581049	0.058058	0.424619	0.195081
FBgn0024887	FBtr0078181	2.44742	TRUE	-4.36667	-0.796969	0.0295395	0.315123	0.145538
FBgn0036980	FBtr0330158	1.8098	TRUE	-2.33333	-0.59723	0.254739	1	0.475788
FBgn0036991	FBtr0078194	2.8832	TRUE	2.43333	0.138249	0.232685	1	0.449308
FBgn0036991	FBtr0344821	2.17846	TRUE	0.9	0.207215	0.67476	1	0.8265
FBgn0036999	FBtr0078199	1.46323	TRUE	0.9	0.36913	0.67476	1	0.8265
FBgn0052425	FBtr0078203	2.29496	TRUE	-1.73333	-0.279344	0.398047	1	0.619158
FBgn0052425	FBtr0078204	1.85526	TRUE	-1.7	-0.322882	0.407212	1	0.626966
FBgn0052425	FBtr0113436	2.4603	TRUE	-3.63333	-0.360133	0.0710556	0.493826	0.2168
FBgn0037011	FBtr0078210	2.28921	TRUE	3.76667	0.242127	0.0620358	0.445299	0.202688
FBgn0001323	FBtr0078212	1.3344	TRUE	-3.96667	-0.653932	0.0502675	0.38619	0.181317
FBgn0037010	FBtr0078214	3.14228	TRUE	4.03333	0.418297	0.0466018	0.369423	0.176514
FBgn0037010	FBtr0331566	2.50244	TRUE	-1.13333	-0.171253	0.598264	1	0.778551
FBgn0037007	FBtr0078216	2.18311	TRUE	-2.5	-0.175759	0.216054	1	0.426048
FBgn0037007	FBtr0078217	2.17974	TRUE	-4.36667	-0.804619	0.0295395	0.315123	0.145538
FBgn0037007	FBtr0078218	1.88277	TRUE	2.56667	0.62634	0.203361	1	0.411308
FBgn0037007	FBtr0078219	1.4967	TRUE	-2.03333	-0.500222	0.321701	1	0.545053
FBgn0037007	FBtr0331567	2.22876	TRUE	-3.4	-0.551107	0.0920766	0.609652	0.252294
FBgn0037000	FBtr0078221	1.82394	TRUE	2.93333	0.314998	0.145937	0.877602	0.336441
FBgn0036994	FBtr0078224	2.78913	TRUE	3.4	0.224413	0.0920766	0.609652	0.252294
FBgn0036994	FBtr0331571	1.86235	TRUE	-3.13333	-0.724462	0.120604	0.759309	0.296093
FBgn0029158	FBtr0290266	2.58126	TRUE	2.4	0.182885	0.239806	1	0.457087
FBgn0036987	FBtr0078231	1.8143	TRUE	0.966667	0.480223	0.652719	1	0.812666
FBgn0036987	FBtr0078232	2.24725	TRUE	2.26667	0.919197	0.26933	1	0.49271
FBgn0036986	FBtr0078233	1.01175	TRUE	-2.06667	-0.368331	0.313543	1	0.538029
FBgn0027565	FBtr0078238	3.01909	TRUE	1.33333	-0.017995	0.533176	1	0.731002
FBgn0001247	FBtr0273273	2.8681	TRUE	-4.2	-0.275937	0.038417	0.336605	0.161869
FBgn0036973	FBtr0078242	2.3606	TRUE	-3.66667	-0.287958	0.0687445	0.481233	0.21376
FBgn0037016	FBtr0078245	1.15444	TRUE	1.56667	0.269769	0.446054	1	0.65743
FBgn0040634	FBtr0345810	1.59802	TRUE	4.26667	0.880548	0.0350504	0.325716	0.156184
FBgn0016696	FBtr0078247	3.44581	TRUE	-4.06667	-0.166769	0.0448951	0.361995	0.174106
FBgn0016696	FBtr0078250	2.17321	TRUE	-0.233333	-0.0466585	0.913762	1	0.957411
FBgn0016696	FBtr0304935	1.50044	TRUE	0.166667	-0.0163462	0.937277	1	0.967399
FBgn0016696	FBtr0304936	1.25575	TRUE	0.433333	0.567404	0.842253	1	0.923553
FBgn0037024	FBtr0078252	2.28632	TRUE	-1.86667	-0.418213	0.362495	1	0.585274
FBgn0037024	FBtr0078253	3.17426	TRUE	-3.7	-0.201511	0.0663243	0.468147	0.209592
FBgn0037024	FBtr0078254	2.3651	TRUE	-1.4	-0.137046	0.510577	1	0.712714
FBgn0037025	FBtr0078255	2.49913	TRUE	-3.8	-1.28341	0.0601753	0.435556	0.199262
FBgn0037027	FBtr0078256	3.8469	TRUE	-4.03333	-0.158157	0.0466018	0.369423	0.176514
FBgn0037027	FBtr0331524	2.33723	TRUE	0.2	0.0301005	0.925555	1	0.962172
FBgn0037027	FBtr0331525	2.08484	TRUE	0.566667	0.127627	0.787577	1	0.889779
FBgn0037027	FBtr0331526	0.493119	TRUE	0.0666667	0	0.971612	1	0.980736
FBgn0037031	FBtr0078264	1.5793	TRUE	-1.93333	-0.567635	0.345973	1	0.570134
FBgn0037031	FBtr0333371	2.5262	TRUE	4.43333	0.528322	0.0249773	0.315123	0.13639
FBgn0037026	FBtr0078272	2.18349	TRUE	3.63333	1.18091	0.0710556	0.493826	0.2168
FBgn0037026	FBtr0331528	2.89197	TRUE	1.26667	0.038299	0.554864	1	0.747887
FBgn0037026	FBtr0331529	2.40252	TRUE	-0.533333	0.304318	0.799563	1	0.896621
FBgn0037022	FBtr0078276	2.92931	TRUE	2.83333	0.274936	0.159623	0.935197	0.355029
FBgn0037021	FBtr0078277	3.68473	TRUE	-1.46667	0.00991098	0.486751	1	0.692916
FBgn0037019	FBtr0078278	2.69018	TRUE	4.46667	0.316737	0.0213808	0.315123	0.126065
FBgn0037018	FBtr0078279	2.91222	TRUE	-0.166667	-0.0751498	0.937277	1	0.967399
FBgn0037017	FBtr0078280	2.07296	TRUE	-2.46667	-0.757244	0.225343	1	0.4397
FBgn0037017	FBtr0345811	1.95157	TRUE	3.53333	1.72051	0.0786384	0.535556	0.229236
FBgn0001320	FBtr0078283	1.78197	TRUE	1.7	0.621329	0.407212	1	0.626966
FBgn0001320	FBtr0344836	1.99458	TRUE	1.3	1.21712	0.543993	1	0.738593
FBgn0037044	FBtr0078287	2.83308	TRUE	1.36667	0.242142	0.521694	1	0.721419
FBgn0037044	FBtr0345136	2.33964	TRUE	-0.7	-0.370499	0.741597	1	0.86713
FBgn0028402	FBtr0078288	2.60607	TRUE	3.43333	0.220399	0.0887891	0.591615	0.246243
FBgn0028402	FBtr0304820	1.36461	TRUE	-1.9	-0.732768	0.354275	1	0.578465
FBgn0026179	FBtr0111038	2.29517	TRUE	2.73333	0.401699	0.175015	0.994865	0.376268
FBgn0026179	FBtr0078289	3.12672	TRUE	2.66667	0.521757	0.185766	1	0.39016
FBgn0026179	FBtr0078290	1.59151	TRUE	1.4	0.554193	0.510577	1	0.712714
FBgn0026179	FBtr0301602	1.11586	TRUE	0.6	-0.211813	0.776184	1	0.885055
FBgn0037050	FBtr0305500	1.077	TRUE	-2.56667	-1.22607	0.203361	1	0.411308
FBgn0037057	FBtr0078297	1.08154	TRUE	0.333333	0.00676548	0.878655	1	0.942414
FBgn0028427	FBtr0078305	3.07701	TRUE	-0.9	-0.0507748	0.67476	1	0.8265
FBgn0028427	FBtr0307160	1.58434	TRUE	3.23333	0.439496	0.109258	0.701586	0.280079
FBgn0037061	FBtr0078309	2.44107	TRUE	0.166667	0.00833312	0.937277	1	0.967399
FBgn0053056	FBtr0078312	2.18268	TRUE	4.46667	0.574275	0.0213808	0.315123	0.126065
FBgn0053054	FBtr0078317	1.89058	TRUE	-0.533333	-0.0136958	0.799563	1	0.896621
FBgn0041100	FBtr0078319	2.52846	TRUE	-3.73333	-0.362141	0.0641639	0.456575	0.20663
FBgn0024150	FBtr0305501	2.30485	TRUE	-4.03333	-0.656927	0.0466018	0.369423	0.176514
FBgn0037045	FBtr0078327	2.70232	TRUE	4.46667	0.498524	0.0213808	0.315123	0.126065
FBgn0003415	FBtr0078329	2.57389	TRUE	-0.766667	-0.10002	0.718598	1	0.852888
FBgn0003415	FBtr0078328	2.75443	TRUE	1.46667	0.973408	0.486751	1	0.692916
FBgn0003415	FBtr0112830	2.52	TRUE	-1.5	-0.38782	0.468146	1	0.672985
FBgn0037071	FBtr0078339	2.22952	TRUE	-4.33333	-0.434374	0.031493	0.31661	0.149336
FBgn0037071	FBtr0321281	1.06163	TRUE	-2	-0.345622	0.330165	1	0.554553
FBgn0037073	FBtr0078342	3.53852	TRUE	-3.36667	-0.178316	0.095198	0.626675	0.256896
FBgn0005694	FBtr0078348	2.80306	TRUE	4.46667	0.445424	0.0213808	0.315123	0.126065
FBgn0005694	FBtr0078349	2.15201	TRUE	2.9	0.682147	0.150364	0.896714	0.34252
FBgn0005694	FBtr0078350	2.61328	TRUE	-1.46667	-0.174808	0.486751	1	0.692916
FBgn0005694	FBtr0330156	3.42236	TRUE	4.23333	0.316629	0.036661	0.330687	0.158791
FBgn0037087	FBtr0078353	2.75621	TRUE	4.03333	0.207292	0.0466018	0.369423	0.176514
FBgn0037092	FBtr0078356	1.87426	TRUE	-0.633333	-0.0579953	0.764694	1	0.878965
FBgn0037093	FBtr0078357	2.92709	TRUE	0.966667	0.1915	0.652719	1	0.812666
FBgn0037093	FBtr0078358	2.58602	TRUE	4	0.994849	0.0485185	0.378063	0.179692
FBgn0037093	FBtr0332716	3.02492	TRUE	4.3	0.509645	0.0332606	0.320779	0.152707
FBgn0037094	FBtr0078359	2.03501	TRUE	1.8	1.07596	0.380296	1	0.602278
FBgn0037094	FBtr0078361	2.3441	TRUE	-3.93333	-1.01049	0.0524172	0.396459	0.18537
FBgn0037094	FBtr0078362	2.55462	TRUE	-1.5	-0.193511	0.468146	1	0.672985
FBgn0037094	FBtr0078363	1.60073	TRUE	-0.133333	-0.254216	0.948347	1	0.97196
FBgn0037094	FBtr0078365	1.38264	TRUE	-0.6	1.07033	0.776184	1	0.885055
FBgn0037094	FBtr0078366	2.01141	TRUE	-2.86667	-0.766329	0.15514	0.916815	0.349361
FBgn0037094	FBtr0301197	1.93259	TRUE	-3.66667	-0.835623	0.0687445	0.481233	0.21376
FBgn0015283	FBtr0333453	3.23755	TRUE	-3.03333	-0.104358	0.133245	0.820231	0.316147
FBgn0052438	FBtr0301600	3.24524	TRUE	-4.33333	-0.33072	0.031493	0.31661	0.149336
FBgn0052438	FBtr0333455	2.06878	TRUE	-0.3	-0.0874294	0.890532	1	0.946877
FBgn0037102	FBtr0078377	2.52657	TRUE	-4	-0.417973	0.0485185	0.378063	0.179692
FBgn0037098	FBtr0346817	2.85758	TRUE	-3.56667	-0.608165	0.0760129	0.521059	0.224858
FBgn0037098	FBtr0346818	1.9102	TRUE	-1.36667	-1.11063	0.521694	1	0.721419
FBgn0037098	FBtr0346819	2.60642	TRUE	0.6	0.0586451	0.776184	1	0.885055
FBgn0029152	FBtr0078383	3.18576	TRUE	-3.96667	-0.349847	0.0502675	0.38619	0.181317
FBgn0029152	FBtr0078384	2.15713	TRUE	3.7	1.01413	0.0663243	0.468147	0.209592
FBgn0029152	FBtr0305331	2.1138	TRUE	-1.26667	-0.142059	0.554864	1	0.747887
FBgn0026371	FBtr0078387	2.576	TRUE	1.06667	0.0438643	0.620082	1	0.791891
FBgn0015239	FBtr0078390	2.62814	TRUE	-2.03333	-0.181528	0.321701	1	0.545053
FBgn0015239	FBtr0078391	2.66083	TRUE	-1.1	-0.0619787	0.609117	1	0.785835
FBgn0015239	FBtr0078392	2.915	TRUE	-2.06667	-0.317514	0.313543	1	0.538029
FBgn0015239	FBtr0078389	2.52645	TRUE	-0.366667	-0.0146284	0.866845	1	0.936544
FBgn0037085	FBtr0078394	2.03794	TRUE	-0.333333	-0.0984267	0.878655	1	0.942414
FBgn0037085	FBtr0332718	1.66453	TRUE	-3.7	-2.99071	0.0663243	0.468147	0.209592
FBgn0014143	FBtr0078395	1.57793	TRUE	-0.466667	0.0547624	0.82892	1	0.915104
FBgn0037082	FBtr0078397	3.03592	TRUE	-3.2	-0.093239	0.112923	0.720528	0.285479
FBgn0037082	FBtr0331822	1.76057	TRUE	0.266667	0.0891119	0.902344	1	0.952894
FBgn0037081	FBtr0078399	3.09184	TRUE	-4.1	-0.476763	0.0432667	0.355167	0.170847
FBgn0037081	FBtr0078400	2.46388	TRUE	-4.23333	-0.937308	0.036661	0.330687	0.158791
FBgn0037076	FBtr0078403	2.59458	TRUE	4.23333	0.280003	0.036661	0.330687	0.158791
FBgn0037074	FBtr0078404	2.73672	TRUE	-3.66667	-0.297985	0.0687445	0.481233	0.21376
FBgn0037074	FBtr0331797	1.81026	TRUE	-3.2	-1.09028	0.112923	0.720528	0.285479
FBgn0037070	FBtr0078406	1.77363	TRUE	0.633333	2.26049	0.764694	1	0.878965
FBgn0037070	FBtr0078407	2.09951	TRUE	3.63333	0.73372	0.0710556	0.493826	0.2168
FBgn0037070	FBtr0321282	2.1903	TRUE	-0.1	-0.181238	0.95995	1	0.975779
FBgn0037070	FBtr0321283	2.27743	TRUE	2.56667	0.532128	0.203361	1	0.411308
FBgn0037070	FBtr0345883	1.82322	TRUE	2.43333	0.637767	0.232685	1	0.449308
FBgn0027945	FBtr0078412	2.85356	TRUE	1.3	-0.0374519	0.543993	1	0.738593
FBgn0037063	FBtr0078417	3.00012	TRUE	-0.666667	-0.0191204	0.753013	1	0.8724
FBgn0037106	FBtr0301160	2.04633	TRUE	0.433333	0.0159841	0.842253	1	0.923553
FBgn0037106	FBtr0333391	1.89043	TRUE	-2.43333	-0.571215	0.232685	1	0.449308
FBgn0037108	FBtr0078422	2.76705	TRUE	2.33333	0.159531	0.254739	1	0.475788
FBgn0037108	FBtr0333392	1.84377	TRUE	2.56667	0.636597	0.203361	1	0.411308
FBgn0037117	FBtr0078430	2.51083	TRUE	-1.63333	-0.22593	0.426457	1	0.642079
FBgn0037117	FBtr0078431	2.38635	TRUE	-3.4	-0.630807	0.0920766	0.609652	0.252294
FBgn0037117	FBtr0333967	2.28199	TRUE	-2.4	-0.477653	0.239806	1	0.457087
FBgn0022936	FBtr0078439	2.77685	TRUE	4.2	0.318213	0.038417	0.336605	0.161869
FBgn0037135	FBtr0303247	2.8309	TRUE	1.33333	0.172082	0.533176	1	0.731002
FBgn0037138	FBtr0078445	2.40727	TRUE	0.866667	0.246989	0.685846	1	0.832863
FBgn0037138	FBtr0078446	2.6661	TRUE	-1.33333	-0.221083	0.533176	1	0.731002
FBgn0037138	FBtr0332813	1.15371	TRUE	1.46667	0.778143	0.486751	1	0.692916
FBgn0037138	FBtr0303031	2.42738	TRUE	0.3	0.0760584	0.890532	1	0.946877
FBgn0052448	FBtr0290247	1.36829	TRUE	1.13333	0.107344	0.598264	1	0.778551
FBgn0037130	FBtr0310451	1.08496	TRUE	-1.6	-0.538609	0.436264	1	0.650595
FBgn0037120	FBtr0078458	2.96687	TRUE	1.26667	0.0617043	0.554864	1	0.747887
FBgn0037120	FBtr0078459	2.05049	TRUE	2.73333	0.79598	0.175015	0.994865	0.376268
FBgn0037120	FBtr0332769	1.96321	TRUE	-1.06667	-0.254981	0.620082	1	0.791891
FBgn0037109	FBtr0078464	3.0326	TRUE	-3.7	-0.329488	0.0663243	0.468147	0.209592
FBgn0037109	FBtr0302592	3.22154	TRUE	2.3	0.298634	0.261778	1	0.483314
FBgn0037109	FBtr0333972	1.84773	TRUE	-1.76667	-0.578727	0.389019	1	0.611625
FBgn0037105	FBtr0078466	2.68241	TRUE	-4.06667	-0.240448	0.0448951	0.361995	0.174106
FBgn0037142	FBtr0078472	2.60366	TRUE	-4.4	-3.62397	0.0274983	0.315123	0.142102
FBgn0037144	FBtr0078475	3.25788	TRUE	-1.13333	-0.136343	0.598264	1	0.778551
FBgn0037149	FBtr0078480	3.13011	TRUE	-3.7	-0.315079	0.0663243	0.468147	0.209592
FBgn0037149	FBtr0334111	2.68527	TRUE	-4.46667	-0.740488	0.0213808	0.315123	0.126065
FBgn0000100	FBtr0078481	4.09033	TRUE	-3.66667	-0.369502	0.0687445	0.481233	0.21376
FBgn0000100	FBtr0334113	1.98889	TRUE	1.2	1.05244	0.576327	1	0.762127
FBgn0037151	FBtr0078484	2.43921	TRUE	2.43333	0.205402	0.232685	1	0.449308
FBgn0037150	FBtr0078485	2.19467	TRUE	0.333333	0.157629	0.878655	1	0.942414
FBgn0027532	FBtr0078486	2.95415	TRUE	-2.9	-0.206703	0.150364	0.896714	0.34252
FBgn0015075	FBtr0078492	3.16609	TRUE	-3.5	-0.309253	0.0814123	0.550895	0.233605
FBgn0004179	FBtr0344983	1.62858	TRUE	1.33333	0.481728	0.533176	1	0.731002
FBgn0004179	FBtr0334747	1.97188	TRUE	0	-0.00647857	0.994186	1	0.994186
FBgn0025702	FBtr0306595	0.911379	TRUE	0.733333	0.341932	0.730096	1	0.860178
FBgn0027086	FBtr0078499	2.24206	TRUE	-2.13333	-2.11822	0.298185	1	0.524191
FBgn0027086	FBtr0078500	3.20302	TRUE	-4.36667	-0.928074	0.0295395	0.315123	0.145538
FBgn0004449	FBtr0078509	2.244	TRUE	-4.46667	-0.892939	0.0213808	0.315123	0.126065
FBgn0004449	FBtr0330159	1.26473	TRUE	-2.36667	-0.833704	0.247291	1	0.465757
FBgn0011771	FBtr0078510	2.70249	TRUE	-3.6	-0.284432	0.0734997	0.507222	0.220584
FBgn0037156	FBtr0078511	3.01474	TRUE	4.4	0.445355	0.0274983	0.315123	0.142102
FBgn0028500	FBtr0078512	3.09734	TRUE	-4.3	-0.367592	0.0332606	0.320779	0.152707
FBgn0028500	FBtr0334751	2.17065	TRUE	-3.43333	-0.878645	0.0887891	0.591615	0.246243
FBgn0052452	FBtr0078523	2.34547	TRUE	-0.6	-0.0747117	0.776184	1	0.885055
FBgn0052452	FBtr0078524	2.31887	TRUE	-3.63333	-1.52095	0.0710556	0.493826	0.2168
FBgn0052452	FBtr0345591	2.71846	TRUE	4.1	0.726694	0.0432667	0.355167	0.170847
FBgn0037188	FBtr0078530	3.15485	TRUE	-2.2	-0.0891894	0.283798	1	0.509645
FBgn0052451	FBtr0078531	2.8882	TRUE	-4.46667	-0.387309	0.0213808	0.315123	0.126065
FBgn0052451	FBtr0078532	1.38164	TRUE	1.66667	0.861611	0.416345	1	0.634122
FBgn0052451	FBtr0078533	2.30337	TRUE	0.1	0.0534901	0.95995	1	0.975779
FBgn0052451	FBtr0302134	1.1158	TRUE	2.5	1.32543	0.216054	1	0.426048
FBgn0052451	FBtr0306600	1.71448	TRUE	-2.36667	-0.678381	0.247291	1	0.465757
FBgn0010830	FBtr0078535	3.01025	TRUE	3.16667	0.234894	0.116728	0.739897	0.291361
FBgn0037186	FBtr0078536	2.00726	TRUE	-1.23333	-0.0697617	0.565289	1	0.753969
FBgn0037184	FBtr0078537	2.41804	TRUE	4.46667	0.516896	0.0213808	0.315123	0.126065
FBgn0037182	FBtr0078539	2.4364	TRUE	2.33333	0.683054	0.254739	1	0.475788
FBgn0037182	FBtr0078540	2.29554	TRUE	-1.66667	-0.672445	0.416345	1	0.634122
FBgn0037182	FBtr0113186	1.47204	TRUE	-1.6	-1.40454	0.436264	1	0.650595
FBgn0037182	FBtr0331775	1.90746	TRUE	-0.6	0.00777812	0.776184	1	0.885055
FBgn0037182	FBtr0330173	2.13481	TRUE	-0.366667	-0.317465	0.866845	1	0.936544
FBgn0037182	FBtr0330174	2.12859	TRUE	-0.533333	-0.103427	0.799563	1	0.896621
FBgn0053169	FBtr0299876	2.24709	TRUE	3.5	0.326568	0.0814123	0.550895	0.233605
FBgn0037200	FBtr0078553	1.61137	TRUE	1.06667	0.405921	0.620082	1	0.791891
FBgn0037202	FBtr0332051	2.90198	TRUE	-0.833333	0.110393	0.696832	1	0.839464
FBgn0037203	FBtr0078555	2.65091	TRUE	4.23333	0.547294	0.036661	0.330687	0.158791
FBgn0037203	FBtr0078556	3.4208	TRUE	-1.4	-0.130676	0.510577	1	0.712714
FBgn0037205	FBtr0078559	2.33725	TRUE	-4.03333	-0.221881	0.0466018	0.369423	0.176514
FBgn0037207	FBtr0078561	3.24009	TRUE	2.13333	0.0907288	0.298185	1	0.524191
FBgn0037207	FBtr0078563	1.48772	TRUE	-1.33333	-1.48958	0.533176	1	0.731002
FBgn0044324	FBtr0078568	3.47148	TRUE	-2.5	-0.189292	0.216054	1	0.426048
FBgn0044324	FBtr0078570	1.64792	TRUE	1.5	1.10495	0.468146	1	0.672985
FBgn0044324	FBtr0332053	1.4967	TRUE	-1.63333	0.306753	0.426457	1	0.642079
FBgn0044324	FBtr0346095	1.33412	TRUE	1.43333	1.20339	0.498822	1	0.703402
FBgn0010348	FBtr0078571	2.8502	TRUE	2.36667	0.359212	0.247291	1	0.465757
FBgn0010348	FBtr0078574	2.53984	TRUE	-2.3	-0.338714	0.261778	1	0.483314
FBgn0010348	FBtr0078575	1.32269	TRUE	-0.766667	-0.201266	0.718598	1	0.852888
FBgn0010348	FBtr0299906	1.72628	TRUE	0.433333	0.312282	0.842253	1	0.923553
FBgn0010348	FBtr0332054	1.58964	TRUE	-1.03333	-0.291965	0.630943	1	0.798004
FBgn0037199	FBtr0078577	2.84893	TRUE	3.86667	0.406283	0.0562328	0.415339	0.192125
FBgn0037199	FBtr0347060	1.74332	TRUE	2.56667	0.474118	0.203361	1	0.411308
FBgn0037374	FBtr0078624	2.52363	TRUE	4.2	0.615244	0.038417	0.336605	0.161869
FBgn0037374	FBtr0078625	2.73958	TRUE	4.46667	0.627133	0.0213808	0.315123	0.126065
FBgn0028690	FBtr0078629	3.6685	TRUE	-0.866667	-0.0455758	0.685846	1	0.832863
FBgn0037377	FBtr0078630	2.85199	TRUE	-3.53333	-0.257007	0.0786384	0.535556	0.229236
FBgn0037379	FBtr0078631	3.18171	TRUE	-4.4	-0.24249	0.0274983	0.315123	0.142102
FBgn0037379	FBtr0335518	2.87475	TRUE	-4.46667	-0.636214	0.0213808	0.315123	0.126065
FBgn0037384	FBtr0344116	2.26013	TRUE	2.06667	0.528429	0.313543	1	0.538029
FBgn0037384	FBtr0078638	2.28863	TRUE	2.16667	0.477459	0.29067	1	0.516353
FBgn0037384	FBtr0078639	2.17847	TRUE	3.06667	0.612019	0.128922	0.799815	0.309732
FBgn0028436	FBtr0078647	2.50259	TRUE	-0.333333	-0.0499966	0.878655	1	0.942414
FBgn0003261	FBtr0078649	2.00418	TRUE	-3.4	-1.07765	0.0920766	0.609652	0.252294
FBgn0003261	FBtr0078650	3.67441	TRUE	-4.33333	-0.26953	0.031493	0.31661	0.149336
FBgn0003261	FBtr0078651	0.698414	TRUE	0.166667	0	0.937277	1	0.967399
FBgn0003261	FBtr0078652	2.60236	TRUE	-1.56667	-0.256118	0.446054	1	0.65743
FBgn0003261	FBtr0078654	0.991499	TRUE	1.56667	0.916289	0.446054	1	0.65743
FBgn0003261	FBtr0309319	2.17633	TRUE	-1	-0.214221	0.642077	1	0.805973
FBgn0003261	FBtr0309320	1.6567	TRUE	0.433333	0.0604777	0.842253	1	0.923553
FBgn0003261	FBtr0309321	2.28745	TRUE	-0.6	-0.114101	0.776184	1	0.885055
FBgn0003261	FBtr0309322	1.10421	TRUE	-3.7	-1.65767	0.0663243	0.468147	0.209592
FBgn0003261	FBtr0302597	1.48967	TRUE	-3.66667	-1.06646	0.0687445	0.481233	0.21376
FBgn0003261	FBtr0301947	2.40208	TRUE	1.36667	0.250157	0.521694	1	0.721419
FBgn0037391	FBtr0078661	2.21752	TRUE	0.166667	0.0922531	0.937277	1	0.967399
FBgn0037391	FBtr0078663	1.45137	TRUE	-0.0666667	0.104497	0.971612	1	0.980736
FBgn0029088	FBtr0078665	2.51857	TRUE	-4.43333	-0.442439	0.0249773	0.315123	0.13639
FBgn0037383	FBtr0344117	2.46721	TRUE	4.03333	0.241463	0.0466018	0.369423	0.176514
FBgn0037383	FBtr0078666	1.5394	TRUE	4.23333	1.00548	0.036661	0.330687	0.158791
FBgn0037378	FBtr0078668	2.80973	TRUE	4.13333	0.387004	0.0416099	0.348504	0.168237
FBgn0037376	FBtr0078669	2.48222	TRUE	-2.63333	-1.72793	0.191429	1	0.3968
FBgn0037376	FBtr0078670	3.10021	TRUE	2.26667	0.330364	0.26933	1	0.49271
FBgn0037329	FBtr0078680	2.41871	TRUE	-3.76667	-0.385022	0.0620358	0.445299	0.202688
FBgn0037329	FBtr0078681	1.43758	TRUE	1.3	0.417128	0.543993	1	0.738593
FBgn0011715	FBtr0078682	3.10893	TRUE	-4.46667	-0.49744	0.0213808	0.315123	0.126065
FBgn0037332	FBtr0078683	2.63666	TRUE	-3.1	-0.610703	0.124869	0.780276	0.303186
FBgn0037332	FBtr0336769	2.53335	TRUE	-0.266667	0.0223424	0.902344	1	0.952894
FBgn0037332	FBtr0345253	1.60757	TRUE	0.0333333	2.897	0.9832	1	0.985701
FBgn0037332	FBtr0345254	2.10968	TRUE	-1.83333	-0.977791	0.371615	1	0.594466
FBgn0051550	FBtr0078684	1.79728	TRUE	-0.766667	0.680836	0.718598	1	0.852888
FBgn0051550	FBtr0113409	0.914262	TRUE	1.86667	1.10229	0.362495	1	0.585274
FBgn0051550	FBtr0392903	0.986826	TRUE	-1.5	-0.19075	0.468146	1	0.672985
FBgn0051550	FBtr0336770	2.40787	TRUE	-4.36667	-1.12262	0.0295395	0.315123	0.145538
FBgn0010051	FBtr0078686	2.74658	TRUE	-4.46667	-1.16528	0.0213808	0.315123	0.126065
FBgn0010051	FBtr0344265	2.2129	TRUE	1.1	0.209896	0.609117	1	0.785835
FBgn0037338	FBtr0078688	3.2235	TRUE	4.36667	0.186636	0.0295395	0.315123	0.145538
FBgn0037341	FBtr0078689	1.659	TRUE	0.566667	0.346646	0.787577	1	0.889779
FBgn0037341	FBtr0078692	2.01159	TRUE	2.16667	0.41904	0.29067	1	0.516353
FBgn0037341	FBtr0290215	1.9518	TRUE	3.03333	0.765108	0.133245	0.820231	0.316147
FBgn0037345	FBtr0078699	2.11348	TRUE	1.36667	0.158024	0.521694	1	0.721419
FBgn0037347	FBtr0333278	1.29272	TRUE	0.566667	0.508292	0.787577	1	0.889779
FBgn0037347	FBtr0273377	2.56458	TRUE	3.53333	0.188711	0.0786384	0.535556	0.229236
FBgn0037351	FBtr0078705	3.78191	TRUE	-0.0666667	0.133421	0.971612	1	0.980736
FBgn0051549	FBtr0335215	2.70683	TRUE	1	0.0878096	0.642077	1	0.805973
FBgn0037354	FBtr0078708	2.95641	TRUE	-2.23333	-0.140739	0.276604	1	0.501434
FBgn0037356	FBtr0078709	2.97421	TRUE	-1.83333	-0.0804794	0.371615	1	0.594466
FBgn0046222	FBtr0078713	3.32927	TRUE	2.5	0.153602	0.216054	1	0.426048
FBgn0046222	FBtr0078714	1.72527	TRUE	2.63333	0.796945	0.191429	1	0.3968
FBgn0037363	FBtr0078716	3.42792	TRUE	-4.33333	-0.29733	0.031493	0.31661	0.149336
FBgn0037368	FBtr0078720	2.39558	TRUE	1.66667	0.309098	0.416345	1	0.634122
FBgn0037368	FBtr0343988	1.68777	TRUE	-0.233333	-0.0253079	0.913762	1	0.957411
FBgn0037368	FBtr0343989	2.03249	TRUE	2.9	1.21146	0.150364	0.896714	0.34252
FBgn0037370	FBtr0078721	3.10726	TRUE	-3.53333	-0.105726	0.0786384	0.535556	0.229236
FBgn0027497	FBtr0347493	1.29802	TRUE	0.133333	0.266339	0.948347	1	0.97196
FBgn0037369	FBtr0078724	2.51818	TRUE	0.0333333	-0.0280155	0.9832	1	0.985701
FBgn0037369	FBtr0301574	2.60663	TRUE	0.166667	-0.0320451	0.937277	1	0.967399
FBgn0004878	FBtr0078725	1.37341	TRUE	3.9	1.31696	0.0543577	0.405965	0.188944
FBgn0010772	FBtr0078728	2.9964	TRUE	-3.46667	-0.111687	0.0854786	0.57337	0.240862
FBgn0010772	FBtr0334951	1.19781	TRUE	0.2	-0.290892	0.925555	1	0.962172
FBgn0037360	FBtr0078730	3.42849	TRUE	-3.43333	-0.319145	0.0887891	0.591615	0.246243
FBgn0037358	FBtr0078732	2.98308	TRUE	-2.3	-0.312823	0.261778	1	0.483314
FBgn0037358	FBtr0334953	3.03093	TRUE	-2.56667	-0.288851	0.203361	1	0.411308
FBgn0027951	FBtr0078733	2.74659	TRUE	1.03333	0.0559882	0.630943	1	0.798004
FBgn0027951	FBtr0078734	2.85655	TRUE	-3.63333	-0.268441	0.0710556	0.493826	0.2168
FBgn0027951	FBtr0290206	1.08022	TRUE	1	0.380975	0.642077	1	0.805973
FBgn0051548	FBtr0078736	2.85426	TRUE	2.36667	0.13101	0.247291	1	0.465757
FBgn0044823	FBtr0078739	3.05179	TRUE	-1.93333	-0.151071	0.345973	1	0.570134
FBgn0037350	FBtr0078740	1.77551	TRUE	3.83333	0.524781	0.058058	0.424619	0.195081
FBgn0017550	FBtr0078741	3.01381	TRUE	-4.33333	-0.444404	0.031493	0.31661	0.149336
FBgn0017550	FBtr0345140	2.85798	TRUE	-3.73333	-0.553838	0.0641639	0.456575	0.20663
FBgn0014366	FBtr0078751	2.75247	TRUE	-4.46667	-0.668137	0.0213808	0.315123	0.126065
FBgn0037344	FBtr0078752	3.01656	TRUE	-4.33333	-0.692469	0.031493	0.31661	0.149336
FBgn0037342	FBtr0078753	2.79864	TRUE	1.56667	0.136425	0.446054	1	0.65743
FBgn0037340	FBtr0078754	2.31743	TRUE	-1.53333	-0.11869	0.456931	1	0.666513
FBgn0037340	FBtr0336763	1.14124	TRUE	-3.6	-1.41686	0.0734997	0.507222	0.220584
FBgn0037339	FBtr0078756	2.50644	TRUE	0.1	0.166341	0.95995	1	0.975779
FBgn0037339	FBtr0078757	3.21499	TRUE	-3.36667	-0.487229	0.095198	0.626675	0.256896
FBgn0037336	FBtr0078762	3.28817	TRUE	-3.13333	-0.31562	0.120604	0.759309	0.296093
FBgn0037336	FBtr0078761	2.82835	TRUE	-4	-0.868683	0.0485185	0.378063	0.179692
FBgn0037336	FBtr0336771	1.47585	TRUE	-3.5	-1.57027	0.0814123	0.550895	0.233605
FBgn0015402	FBtr0078766	2.88487	TRUE	3.43333	0.847289	0.0887891	0.591615	0.246243
FBgn0015402	FBtr0344272	1.28636	TRUE	-0.2	-0.0820047	0.925555	1	0.962172
FBgn0015402	FBtr0344273	1.71376	TRUE	-3.73333	-0.968007	0.0641639	0.456575	0.20663
FBgn0015402	FBtr0344274	2.63462	TRUE	-0.566667	-0.138087	0.787577	1	0.889779
FBgn0025825	FBtr0078767	2.59885	TRUE	-2.9	-0.252134	0.150364	0.896714	0.34252
FBgn0037327	FBtr0078770	3.00433	TRUE	-1.56667	-0.104893	0.446054	1	0.65743
FBgn0037327	FBtr0330026	2.3416	TRUE	-2	-0.492927	0.330165	1	0.554553
FBgn0037327	FBtr0330027	2.09193	TRUE	-2.3	-1.91237	0.261778	1	0.483314
FBgn0037297	FBtr0078774	1.22161	TRUE	-0.166667	0.367025	0.937277	1	0.967399
FBgn0037297	FBtr0078775	2.42207	TRUE	4.43333	0.81187	0.0249773	0.315123	0.13639
FBgn0037297	FBtr0334907	2.53702	TRUE	4.36667	0.746891	0.0295395	0.315123	0.145538
FBgn0037299	FBtr0078777	2.63764	TRUE	-2.6	-0.278503	0.197392	1	0.403819
FBgn0037299	FBtr0305001	1.76439	TRUE	-3.2	-1.02464	0.112923	0.720528	0.285479
FBgn0037299	FBtr0305002	1.88638	TRUE	0	0.0017294	0.994186	1	0.994186
FBgn0037301	FBtr0078778	2.99372	TRUE	-1.13333	-0.0424648	0.598264	1	0.778551
FBgn0037304	FBtr0078779	1.0114	TRUE	-0.666667	-0.103787	0.753013	1	0.8724
FBgn0003275	FBtr0078787	2.4392	TRUE	-0.333333	-0.0363397	0.878655	1	0.942414
FBgn0037315	FBtr0078803	3.35906	TRUE	-3.36667	-0.280311	0.095198	0.626675	0.256896
FBgn0037305	FBtr0078821	2.86209	TRUE	0.166667	-0.132996	0.937277	1	0.967399
FBgn0260462	FBtr0078822	2.78948	TRUE	1.6	0.124152	0.436264	1	0.650595
FBgn0040208	FBtr0078827	3.1748	TRUE	2.53333	0.101411	0.209623	1	0.419084
FBgn0040208	FBtr0334909	2.16041	TRUE	3.16667	0.937894	0.116728	0.739897	0.291361
FBgn0037298	FBtr0078828	2.84912	TRUE	-0.3	-0.0240414	0.890532	1	0.946877
FBgn0037298	FBtr0078829	2.91425	TRUE	1.86667	0.120255	0.362495	1	0.585274
FBgn0037298	FBtr0078830	2.29072	TRUE	3.83333	0.951691	0.058058	0.424619	0.195081
FBgn0004913	FBtr0100159	1.47624	TRUE	-2.16667	-0.570708	0.29067	1	0.516353
FBgn0037293	FBtr0078842	2.85644	TRUE	-3.23333	-0.250323	0.109258	0.701586	0.280079
FBgn0010313	FBtr0308118	1.26635	TRUE	3.26667	2.78368	0.105889	0.683942	0.27502
FBgn0010313	FBtr0308119	1.42115	TRUE	-4.3	-1.04502	0.0332606	0.320779	0.152707
FBgn0004436	FBtr0078849	1.50907	TRUE	-0.633333	-0.0379276	0.764694	1	0.878965
FBgn0037262	FBtr0078856	1.87835	TRUE	2.33333	0.922864	0.254739	1	0.475788
FBgn0037262	FBtr0336456	1.26886	TRUE	2.46667	0.633429	0.225343	1	0.4397
FBgn0037263	FBtr0301296	2.41128	TRUE	2.33333	0.244614	0.254739	1	0.475788
FBgn0022981	FBtr0305313	1.44376	TRUE	-0.266667	-0.0694716	0.902344	1	0.952894
FBgn0037265	FBtr0078861	2.50319	TRUE	-1.5	-0.184279	0.468146	1	0.672985
FBgn0037265	FBtr0308820	1.57928	TRUE	-0.3	-0.0179232	0.890532	1	0.946877
FBgn0010750	FBtr0078868	3.11844	TRUE	-3.43333	-0.176831	0.0887891	0.591615	0.246243
FBgn0037279	FBtr0078870	2.37046	TRUE	-2.73333	-0.436307	0.175015	0.994865	0.376268
FBgn0037279	FBtr0078871	1.82344	TRUE	1.9	4.19898	0.354275	1	0.578465
FBgn0037279	FBtr0345174	2.4843	TRUE	-0.166667	-0.152956	0.937277	1	0.967399
FBgn0037282	FBtr0078875	2.59165	TRUE	-3.2	-0.356583	0.112923	0.720528	0.285479
FBgn0037282	FBtr0334900	2.45226	TRUE	-1.63333	-0.383544	0.426457	1	0.642079
FBgn0037282	FBtr0334901	2.1868	TRUE	0.966667	0.327035	0.652719	1	0.812666
FBgn0026417	FBtr0078876	1.82344	TRUE	-4.03333	-0.486243	0.0466018	0.369423	0.176514
FBgn0037270	FBtr0078892	3.24995	TRUE	4.06667	0.440769	0.0448951	0.361995	0.174106
FBgn0040466	FBtr0078893	2.52224	TRUE	-2.06667	-0.169387	0.313543	1	0.538029
FBgn0037261	FBtr0301297	2.53361	TRUE	-3.4	-0.277927	0.0920766	0.609652	0.252294
FBgn0037261	FBtr0336457	1.59643	TRUE	1.96667	1.9781	0.337845	1	0.562225
FBgn0027930	FBtr0078903	1.17176	TRUE	1.23333	0.308316	0.565289	1	0.753969
FBgn0037232	FBtr0273009	2.25578	TRUE	0.0333333	-0.00564093	0.9832	1	0.985701
FBgn0037232	FBtr0347365	1.14946	TRUE	-2.16667	-0.794253	0.29067	1	0.516353
FBgn0037239	FBtr0078915	2.77677	TRUE	4.06667	0.290961	0.0448951	0.361995	0.174106
FBgn0037241	FBtr0078919	2.08828	TRUE	0.3	0.173129	0.890532	1	0.946877
FBgn0037241	FBtr0302339	2.09977	TRUE	3.3	2.18061	0.102526	0.66612	0.269895
FBgn0037252	FBtr0078926	2.53951	TRUE	1	0.130769	0.642077	1	0.805973
FBgn0051523	FBtr0078935	2.13034	TRUE	2.66667	0.927048	0.185766	1	0.39016
FBgn0051523	FBtr0078938	1.86018	TRUE	0.5	0.532952	0.811588	1	0.903562
FBgn0051523	FBtr0335429	2.42962	TRUE	-3	-0.458207	0.137623	0.840454	0.323524
FBgn0051522	FBtr0306343	2.38474	TRUE	2.63333	0.465675	0.191429	1	0.3968
FBgn0051522	FBtr0306344	1.70302	TRUE	2.4	0.365983	0.239806	1	0.457087
FBgn0051522	FBtr0335432	1.37776	TRUE	-2.2	-0.791311	0.283798	1	0.509645
FBgn0037251	FBtr0078943	1.88434	TRUE	1.86667	0.392415	0.362495	1	0.585274
FBgn0037251	FBtr0346735	2.38644	TRUE	4.1	0.598238	0.0432667	0.355167	0.170847
FBgn0037249	FBtr0346646	2.26065	TRUE	-4	-2.28392	0.0485185	0.378063	0.179692
FBgn0037248	FBtr0078946	3.46469	TRUE	-2.83333	-0.1353	0.159623	0.935197	0.355029
FBgn0037248	FBtr0301244	2.93846	TRUE	-2.56667	-0.394322	0.203361	1	0.411308
FBgn0037248	FBtr0336458	2.88387	TRUE	0.2	0.0482208	0.925555	1	0.962172
FBgn0037242	FBtr0078950	2.67729	TRUE	-1.4	-0.378082	0.510577	1	0.712714
FBgn0037242	FBtr0339552	3.20485	TRUE	4.03333	0.399042	0.0466018	0.369423	0.176514
FBgn0037236	FBtr0078953	2.1288	TRUE	1.8	0.239745	0.380296	1	0.602278
FBgn0037236	FBtr0344740	3.17999	TRUE	-3.83333	-0.171881	0.058058	0.424619	0.195081
FBgn0037231	FBtr0078958	2.74845	TRUE	1.36667	0.0554288	0.521694	1	0.721419
FBgn0037213	FBtr0078961	1.86995	TRUE	-3.9	-0.56186	0.0543577	0.405965	0.188944
FBgn0037215	FBtr0078964	2.71946	TRUE	-0.5	-0.0473722	0.811588	1	0.903562
FBgn0037215	FBtr0336704	1.9088	TRUE	-2.96667	-1.15397	0.14188	0.859681	0.330013
FBgn0037215	FBtr0306022	2.08972	TRUE	-2.56667	-1.00839	0.203361	1	0.411308
FBgn0037218	FBtr0078966	2.88905	TRUE	-0.233333	0.0164488	0.913762	1	0.957411
FBgn0015331	FBtr0078967	2.29498	TRUE	-4.3	-0.613999	0.0332606	0.320779	0.152707
FBgn0010225	FBtr0078973	1.20564	TRUE	-0.166667	-0.229285	0.937277	1	0.967399
FBgn0010225	FBtr0336707	1.04273	TRUE	-0.5	-0.0829395	0.811588	1	0.903562
FBgn0037220	FBtr0078985	2.83433	TRUE	-1.5	-0.0815744	0.468146	1	0.672985
FBgn0031670	FBtr0079000	2.34255	TRUE	0.933333	0.0635665	0.663567	1	0.819738
FBgn0031682	FBtr0329981	1.52188	TRUE	2.1	0.937956	0.305881	1	0.531116
FBgn0031683	FBtr0079019	0.650953	TRUE	-0.8	0	0.70771	1	0.846922
FBgn0031683	FBtr0329983	2.45577	TRUE	-2.23333	-0.272162	0.276604	1	0.501434
FBgn0031684	FBtr0079025	2.58069	TRUE	-3.53333	-0.307552	0.0786384	0.535556	0.229236
FBgn0031684	FBtr0345333	1.60765	TRUE	1.8	0.400917	0.380296	1	0.602278
FBgn0031681	FBtr0111024	2.90146	TRUE	-4.43333	-0.506781	0.0249773	0.315123	0.13639
FBgn0028694	FBtr0079027	3.42606	TRUE	0.4	0.0180922	0.854289	1	0.929464
FBgn0031678	FBtr0079028	2.41247	TRUE	3.43333	0.172347	0.0887891	0.591615	0.246243
FBgn0022023	FBtr0079031	3.34125	TRUE	3.96667	0.165425	0.0502675	0.38619	0.181317
FBgn0031675	FBtr0301206	1.01259	TRUE	1.2	0.55277	0.576327	1	0.762127
FBgn0031673	FBtr0079034	1.8934	TRUE	0.333333	0.0238215	0.878655	1	0.942414
FBgn0031673	FBtr0079035	1.09353	TRUE	-0.6	-0.107743	0.776184	1	0.885055
FBgn0031673	FBtr0301905	1.37927	TRUE	-0.0666667	0.269395	0.971612	1	0.980736
FBgn0031668	FBtr0079037	3.03287	TRUE	-2.7	-0.220397	0.180307	1	0.382835
FBgn0053113	FBtr0079040	1.90201	TRUE	0.433333	0.37424	0.842253	1	0.923553
FBgn0053113	FBtr0079041	1.8486	TRUE	4.46667	1.2963	0.0213808	0.315123	0.126065
FBgn0053113	FBtr0079042	1.52642	TRUE	3.46667	1.17148	0.0854786	0.57337	0.240862
FBgn0053113	FBtr0079044	1.16722	TRUE	-0.966667	-0.163654	0.652719	1	0.812666
FBgn0053113	FBtr0079038	1.42793	TRUE	-1.2	-0.311193	0.576327	1	0.762127
FBgn0053113	FBtr0301539	1.49646	TRUE	3.13333	1.15242	0.120604	0.759309	0.296093
FBgn0053113	FBtr0301540	1.10285	TRUE	0.766667	0.221583	0.718598	1	0.852888
FBgn0031696	FBtr0079069	2.02241	TRUE	-4.36667	-5.0077	0.0295395	0.315123	0.145538
FBgn0031696	FBtr0342934	2.48363	TRUE	4.26667	1.07201	0.0350504	0.325716	0.156184
FBgn0015031	FBtr0079072	1.88964	TRUE	-0.733333	0.758103	0.730096	1	0.860178
FBgn0015031	FBtr0307034	2.02984	TRUE	1.23333	0.158998	0.565289	1	0.753969
FBgn0015031	FBtr0307035	2.27239	TRUE	1.66667	0.994387	0.416345	1	0.634122
FBgn0031703	FBtr0079077	2.4599	TRUE	-1.8	-0.176902	0.380296	1	0.602278
FBgn0031698	FBtr0307040	2.9337	TRUE	-2.9	-0.330139	0.150364	0.896714	0.34252
FBgn0031698	FBtr0329969	3.25082	TRUE	-4.43333	-0.635012	0.0249773	0.315123	0.13639
FBgn0000228	FBtr0079084	2.92556	TRUE	-1.56667	-0.195805	0.446054	1	0.65743
FBgn0000228	FBtr0079085	1.81961	TRUE	-0.266667	-0.58462	0.902344	1	0.952894
FBgn0000228	FBtr0302568	2.80355	TRUE	-3.36667	-0.636555	0.095198	0.626675	0.256896
FBgn0000228	FBtr0342939	2.06209	TRUE	0.366667	0.242744	0.866845	1	0.936544
FBgn0000228	FBtr0310624	1.50508	TRUE	-1.46667	-3.80959	0.486751	1	0.692916
FBgn0000228	FBtr0310625	1.41357	TRUE	0.233333	0.935159	0.913762	1	0.957411
FBgn0003716	FBtr0079089	1.68882	TRUE	-1.4	-0.246944	0.510577	1	0.712714
FBgn0000318	FBtr0079095	2.99342	TRUE	-1.9	-0.101451	0.354275	1	0.578465
FBgn0051989	FBtr0079097	2.67776	TRUE	-3.76667	-0.278885	0.0620358	0.445299	0.202688
FBgn0051989	FBtr0301318	0.790198	TRUE	0.666667	0	0.753013	1	0.8724
FBgn0051915	FBtr0079099	2.45691	TRUE	-3.33333	-0.223407	0.098773	0.646018	0.263159
FBgn0002525	FBtr0307059	1.68401	TRUE	-0.1	0.0236484	0.95995	1	0.975779
FBgn0031717	FBtr0307062	1.25494	TRUE	-1.23333	-0.438801	0.565289	1	0.753969
FBgn0031718	FBtr0114511	2.63861	TRUE	-0.966667	0.0285986	0.652719	1	0.812666
FBgn0014189	FBtr0079123	0.904353	TRUE	-1.33333	-0.286057	0.533176	1	0.731002
FBgn0014189	FBtr0079125	3.09309	TRUE	2.13333	0.250181	0.298185	1	0.524191
FBgn0014189	FBtr0331676	1.91959	TRUE	1.06667	0.583345	0.620082	1	0.791891
FBgn0031713	FBtr0079128	2.96374	TRUE	-0.466667	-0.0443575	0.82892	1	0.915104
FBgn0031710	FBtr0079129	2.59105	TRUE	-4.36667	-0.331549	0.0295395	0.315123	0.145538
FBgn0031708	FBtr0079130	2.40883	TRUE	1.03333	0.0720771	0.630943	1	0.798004
FBgn0024191	FBtr0079134	0.795819	TRUE	-0.5	0	0.811588	1	0.903562
FBgn0024191	FBtr0345545	2.601	TRUE	-1.03333	-0.0629427	0.630943	1	0.798004
FBgn0031740	FBtr0079139	2.85809	TRUE	2.16667	0.128627	0.29067	1	0.516353
FBgn0031741	FBtr0344769	2.56982	TRUE	3.73333	0.439979	0.0641639	0.456575	0.20663
FBgn0031741	FBtr0342609	1.94378	TRUE	3.23333	1.02273	0.109258	0.701586	0.280079
FBgn0043362	FBtr0079144	1.95557	TRUE	-4.43333	-0.722027	0.0249773	0.315123	0.13639
FBgn0001128	FBtr0333228	2.03705	TRUE	4.33333	0.53903	0.031493	0.31661	0.149336
FBgn0031752	FBtr0273412	2.07589	TRUE	-2.93333	-0.513053	0.145937	0.877602	0.336441
FBgn0031752	FBtr0333231	2.58932	TRUE	3.7	0.355273	0.0663243	0.468147	0.209592
FBgn0031745	FBtr0079158	1.4904	TRUE	1.33333	0.189783	0.533176	1	0.731002
FBgn0031738	FBtr0301234	2.70044	TRUE	4.3	0.762309	0.0332606	0.320779	0.152707
FBgn0031738	FBtr0301235	2.64632	TRUE	3.9	0.622539	0.0543577	0.405965	0.188944
FBgn0031738	FBtr0301236	2.20686	TRUE	0.7	0.177484	0.741597	1	0.86713
FBgn0031738	FBtr0332038	1.462	TRUE	1.46667	0.660202	0.486751	1	0.692916
FBgn0001942	FBtr0079175	2.72742	TRUE	-0.333333	-0.151325	0.878655	1	0.942414
FBgn0001942	FBtr0079176	4.05585	TRUE	1.2	0.0785395	0.576327	1	0.762127
FBgn0001942	FBtr0079177	2.34454	TRUE	-2.4	-1.78699	0.239806	1	0.457087
FBgn0001942	FBtr0079178	1.30783	TRUE	-0.766667	0.188492	0.718598	1	0.852888
FBgn0001942	FBtr0307068	3.19776	TRUE	2.1	0.500899	0.305881	1	0.531116
FBgn0001942	FBtr0331201	2.76329	TRUE	2.43333	0.559049	0.232685	1	0.449308
FBgn0001941	FBtr0332599	1.67256	TRUE	0.833333	0.94185	0.696832	1	0.839464
FBgn0031760	FBtr0307300	1.38918	TRUE	0.266667	0.0183111	0.902344	1	0.952894
FBgn0051643	FBtr0079182	2.6322	TRUE	2.53333	0.201089	0.209623	1	0.419084
FBgn0031768	FBtr0079183	1.5633	TRUE	-2.8	-0.583144	0.164674	0.955364	0.362239
FBgn0031768	FBtr0079184	2.06983	TRUE	-0.166667	0.0363791	0.937277	1	0.967399
FBgn0031769	FBtr0079185	3.50974	TRUE	3.76667	0.319329	0.0620358	0.445299	0.202688
FBgn0031769	FBtr0079186	2.20669	TRUE	1.4	0.191713	0.510577	1	0.712714
FBgn0031769	FBtr0346135	2.09821	TRUE	1.96667	1.31681	0.337845	1	0.562225
FBgn0031772	FBtr0343122	2.01772	TRUE	1.83333	0.783093	0.371615	1	0.594466
FBgn0031774	FBtr0079190	2.32962	TRUE	4.4	0.890879	0.0274983	0.315123	0.142102
FBgn0031774	FBtr0343123	1.72208	TRUE	-0.6	-0.0407916	0.776184	1	0.885055
FBgn0031774	FBtr0343124	1.23303	TRUE	-2.23333	-1.82067	0.276604	1	0.501434
FBgn0031776	FBtr0343125	2.58061	TRUE	3.33333	0.429301	0.098773	0.646018	0.263159
FBgn0031782	FBtr0333407	2.76237	TRUE	-4.33333	-0.287502	0.031493	0.31661	0.149336
FBgn0031779	FBtr0079211	2.99141	TRUE	3.23333	0.400753	0.109258	0.701586	0.280079
FBgn0031777	FBtr0079213	1.58163	TRUE	-1.1	-0.165119	0.609117	1	0.785835
FBgn0031773	FBtr0079215	2.75123	TRUE	0.4	0.00798939	0.854289	1	0.929464
FBgn0029161	FBtr0079218	2.96321	TRUE	4.26667	1.27929	0.0350504	0.325716	0.156184
FBgn0029161	FBtr0112945	1.61319	TRUE	-2.73333	-0.793052	0.175015	0.994865	0.376268
FBgn0029161	FBtr0299810	2.8687	TRUE	2.2	0.0857645	0.283798	1	0.509645
FBgn0029161	FBtr0343130	2.28441	TRUE	3.16667	1.07169	0.116728	0.739897	0.291361
FBgn0000052	FBtr0079220	2.82439	TRUE	-2.5	-0.523422	0.216054	1	0.426048
FBgn0031766	FBtr0079222	1.95435	TRUE	3.53333	0.374269	0.0786384	0.535556	0.229236
FBgn0025742	FBtr0079223	2.49735	TRUE	-1.46667	-0.172853	0.486751	1	0.692916
FBgn0025742	FBtr0345290	1.89374	TRUE	0.6	0.256844	0.776184	1	0.885055
FBgn0031764	FBtr0079225	2.01007	TRUE	2.26667	0.24793	0.26933	1	0.49271
FBgn0031764	FBtr0079226	1.9228	TRUE	-2.33333	-0.346611	0.254739	1	0.475788
FBgn0031759	FBtr0307069	2.22342	TRUE	-4.46667	-2.0411	0.0213808	0.315123	0.126065
FBgn0031759	FBtr0307071	3.18843	TRUE	-4	-0.459183	0.0485185	0.378063	0.179692
FBgn0000308	FBtr0079233	3.21263	TRUE	2.5	0.433699	0.216054	1	0.426048
FBgn0000308	FBtr0079236	2.20908	TRUE	-3.7	-0.364675	0.0663243	0.468147	0.209592
FBgn0000308	FBtr0309212	2.16873	TRUE	3.73333	0.903006	0.0641639	0.456575	0.20663
FBgn0000308	FBtr0309213	1.07189	TRUE	1.4	0.401165	0.510577	1	0.712714
FBgn0015623	FBtr0079250	3.34901	TRUE	0.466667	0.00493509	0.82892	1	0.915104
FBgn0015623	FBtr0079251	2.85479	TRUE	-4.03333	-1.30834	0.0466018	0.369423	0.176514
FBgn0043854	FBtr0290281	2.82711	TRUE	0.266667	0.0224274	0.902344	1	0.952894
FBgn0043854	FBtr0344864	3.29176	TRUE	-2.2	-0.165111	0.283798	1	0.509645
FBgn0031811	FBtr0079256	1.77043	TRUE	3.16667	0.589466	0.116728	0.739897	0.291361
FBgn0031811	FBtr0343151	1.16163	TRUE	-0.766667	-0.726009	0.718598	1	0.852888
FBgn0027496	FBtr0079261	2.62393	TRUE	0.133333	0.00297238	0.948347	1	0.97196
FBgn0051638	FBtr0113411	2.81444	TRUE	-2.73333	-0.317115	0.175015	0.994865	0.376268
FBgn0031824	FBtr0079263	2.63839	TRUE	4.03333	0.271474	0.0466018	0.369423	0.176514
FBgn0031822	FBtr0079264	2.6941	TRUE	-0.833333	-0.0378071	0.696832	1	0.839464
FBgn0031817	FBtr0079270	1.92222	TRUE	0.233333	0.145102	0.913762	1	0.957411
FBgn0031817	FBtr0331185	2.27614	TRUE	-1.06667	-0.16155	0.620082	1	0.791891
FBgn0031814	FBtr0079272	3.12952	TRUE	-2.5	-0.212128	0.216054	1	0.426048
FBgn0031799	FBtr0079284	2.47878	TRUE	-4.26667	-0.450736	0.0350504	0.325716	0.156184
FBgn0051637	FBtr0079287	2.65452	TRUE	0.866667	0.652634	0.685846	1	0.832863
FBgn0051637	FBtr0343155	2.65863	TRUE	0.466667	-0.0435629	0.82892	1	0.915104
FBgn0031830	FBtr0079288	2.05051	TRUE	0	0.0279848	0.994186	1	0.994186
FBgn0031830	FBtr0343157	2.76654	TRUE	-0.533333	0.152443	0.799563	1	0.896621
FBgn0031842	FBtr0079295	2.76535	TRUE	-1.33333	-0.294282	0.533176	1	0.731002
FBgn0031842	FBtr0343864	1.22335	TRUE	-1.7	-1.458	0.407212	1	0.626966
FBgn0031842	FBtr0303224	3.01462	TRUE	-3.93333	-0.750433	0.0524172	0.396459	0.18537
FBgn0028467	FBtr0079297	3.02628	TRUE	-4.46667	-0.329151	0.0213808	0.315123	0.126065
FBgn0000392	FBtr0346452	2.31201	TRUE	-1.4	-0.221178	0.510577	1	0.712714
FBgn0031851	FBtr0079299	2.54019	TRUE	-4.46667	-0.699576	0.0213808	0.315123	0.126065
FBgn0046704	FBtr0079301	2.28826	TRUE	-1.96667	-0.542121	0.337845	1	0.562225
FBgn0046704	FBtr0079300	3.08269	TRUE	-3.5	-0.234343	0.0814123	0.550895	0.233605
[truncated: 11,008 more rows]

## Sheet: Pum RIP-Seq
FBgn_ID	gene_ID	FBtr_ID	Trx_name	Length	log2FC	qvalue
FBgn0001142	Gs1	FBtr0300568	Gs1-RD	1699	8.27559	5.20562e-06
FBgn0037686	RpL34b	FBtr0339177	RpL34b-RD	622	7.47417	0.712714
FBgn0283521	lola	FBtr0089347	lola-RG	4267	6.42515	5.20562e-06
FBgn0015778	rin	FBtr0082797	rin-RB	3268	6.10601	0.126065
FBgn0010313	corto	FBtr0345141	corto-RE	2992	5.88893	5.20562e-06
FBgn0051108	TTLL5	FBtr0339247	TTLL5-RB	3273	5.73061	0.672985
FBgn0004648	svr	FBtr0344737	svr-RL	2851	5.72468	5.20562e-06
FBgn0265605	Ric	FBtr0300576	Ric-RB	2046	5.70155	5.20562e-06
FBgn0003870	ttk	FBtr0085829	ttk-RA	3590	5.6492	0.233605
FBgn0266101	CG44838	FBtr0343560	CG44838-RF	3089	5.49579	0.309732
FBgn0030648	CG6340	FBtr0074039	CG6340-RB	1814	5.43666	0.152707
FBgn0051163	SKIP	FBtr0305036	SKIP-RF	6584	5.34009	5.20562e-06
FBgn0003165	pum	FBtr0081991	pum-RD	6659	5.2869	5.20562e-06
FBgn0283657	Tlk	FBtr0299582	Tlk-RH	5890	5.27095	0.21376
FBgn0000541	E(bx)	FBtr0072523	E(bx)-RC	7834	5.24529	0.86713
FBgn0052479	Usp10	FBtr0072589	Usp10-RA	6346	5.19436	5.20562e-06
FBgn0000289	cg	FBtr0087527	cg-RB	3361	5.17785	0.785835
FBgn0262737	mub	FBtr0301364	mub-RE	3441	5.15357	0.303186
FBgn0285948	RpL27A	FBtr0345285	RpL27A-RD	613	5.14955	0.545053
FBgn0283442	vas	FBtr0445185	vas-RA	2241	5.1181	0.516353
FBgn0085470	lmgB	FBtr0336886	lmgB-RD	1462	5.07274	0.721419
FBgn0041781	SCAR	FBtr0080148	SCAR-RA	2292	5.03959	0.545053
FBgn0022029	l(2)k01209	FBtr0086915	l(2)k01209-RD	2284	5.01425	0.382835
FBgn0031054	Ssu72	FBtr0344152	Ssu72-RC	1368	4.94042	0.426048
FBgn0003165	pum	FBtr0081990	pum-RA	6661	4.79369	5.20562e-06
FBgn0037720	CG8312	FBtr0334617	CG8312-RD	3414	4.77022	5.20562e-06
FBgn0020279	lig	FBtr0088774	lig-RA	5081	4.75375	0.538029
FBgn0026375	RhoGAPp190	FBtr0074482	RhoGAPp190-RC	7639	4.74025	0.355029
FBgn0039487	gb	FBtr0347412	gb-RC	2449	4.73129	0.531116
FBgn0052479	Usp10	FBtr0333267	Usp10-RC	7873	4.71432	5.20562e-06
FBgn0038872	Nelf-A	FBtr0339192	Nelf-A-RC	4645	4.70403	5.20562e-06
FBgn0039830	ATPsynC	FBtr0306237	ATPsynC-RG	722	4.69955	5.20562e-06
FBgn0003165	pum	FBtr0081993	pum-RB	7473	4.69035	5.20562e-06
FBgn0003165	pum	FBtr0081994	pum-RE	4685	4.68015	5.20562e-06
FBgn0030481	CG1662	FBtr0073776	CG1662-RA	1282	4.64095	0.65743
FBgn0052640	CG32640	FBtr0073728	CG32640-RA	466	4.61758	5.20562e-06
FBgn0013733	shot	FBtr0273224	shot-RK	17731	4.52935	0.362239
FBgn0042693	wrd	FBtr0290320	wrd-RJ	2831	4.46675	0.368863
FBgn0010280	Taf4	FBtr0333290	Taf4-RG	4756	4.41812	0.672985
FBgn0033929	Tfb1	FBtr0087548	Tfb1-RB	2025	4.40382	0.878965
FBgn0003862	trx	FBtr0082948	trx-RB	12815	4.2145	0.240862
FBgn0262125	Sec23	FBtr0078711	Sec23-RA	2706	4.21413	0.403819
FBgn0037279	CG1129	FBtr0078871	CG1129-RA	1715	4.19898	0.578465
FBgn0052250	PMP34	FBtr0306092	PMP34-RB	1295	4.19734	0.712714
FBgn0015278	Pi3K68D	FBtr0076086	Pi3K68D-RB	1880	4.06679	0.936544
FBgn0263773	fok	FBtr0310558	fok-RA	1205	4.05847	0.195081
FBgn0035976	PGRP-LC	FBtr0089490	PGRP-LC-RA	1876	4.05109	0.296093
FBgn0003165	pum	FBtr0081992	pum-RC	6809	4.04396	5.20562e-06
FBgn0261873	sdt	FBtr0333721	sdt-RN	5650	4.02267	0.672985
FBgn0011225	jar	FBtr0301370	jar-RJ	4279	4.01311	5.20562e-06
FBgn0039635	Pdhb	FBtr0085369	Pdhb-RD	1386	3.9367	0.13639
FBgn0030863	CG8188	FBtr0340633	CG8188-RC	2442	3.93384	0.309732
FBgn0030753	rngo	FBtr0074278	rngo-RA	2186	3.89853	5.20562e-06
FBgn0028646	aralar1	FBtr0085695	aralar1-RD	2340	3.87555	0.791891
FBgn0036853	mRpL21	FBtr0075022	mRpL21-RA	742	3.82034	0.419084
FBgn0041775	tral	FBtr0332640	tral-RG	2869	3.76759	0.285479
FBgn0011481	Ssdp	FBtr0083613	Ssdp-RC	3143	3.75935	0.778551
FBgn0016126	CaMKI	FBtr0089063	CaMKI-RH	1950	3.75778	0.126065
FBgn0039157	Myo95E	FBtr0084578	Myo95E-RB	5226	3.75424	0.39016
FBgn0005278	Sam-S	FBtr0089435	Sam-S-RJ	2309	3.74499	5.20562e-06
FBgn0039565	CG4884	FBtr0085264	CG4884-RA	649	3.69046	0.355029
FBgn0267376	SelR	FBtr0306641	SelR-RJ	2392	3.60355	5.20562e-06
FBgn0011705	rost	FBtr0331454	rost-RC	1483	3.56449	0.13639
FBgn0003360	sesB	FBtr0346384	sesB-RE	1685	3.51342	0.174106
FBgn0034570	CG10543	FBtr0332593	CG10543-RE	5550	3.48396	0.34252
FBgn0261873	sdt	FBtr0089978	sdt-RB	6828	3.48038	0.501434
FBgn0010280	Taf4	FBtr0333291	Taf4-RH	5011	3.40858	0.611625
FBgn0036365	cmb	FBtr0331534	cmb-RD	5200	3.38665	0.578465
FBgn0041180	Tep4	FBtr0081254	Tep4-RA	4694	3.38025	0.362239
FBgn0039141	spas	FBtr0445310	spas-RE	2810	3.37907	0.747887
FBgn0036336	ste14	FBtr0332075	ste14-RB	1121	3.36875	0.798004
FBgn0017561	Ork1	FBtr0073404	Ork1-RB	3979	3.35824	0.168237
FBgn0087007	bbg	FBtr0273423	bbg-RE	3949	3.3426	0.672985
FBgn0263391	hts	FBtr0309112	hts-RO	4161	3.34221	0.34252
FBgn0036053	iPLA2-VIA	FBtr0076365	iPLA2-VIA-RD	3592	3.30331	0.501434
FBgn0032910	CG9265	FBtr0081507	CG9265-RA	2074	3.29092	0.562225
FBgn0032401	Plzf	FBtr0080305	Plzf-RA	2006	3.28769	0.778551
FBgn0036922	CG14182	FBtr0074913	CG14182-RA	932	3.2822	0.291361
FBgn0010198	RpS15Aa	FBtr0073793	RpS15Aa-RA	678	3.27018	0.562225
FBgn0031077	THADA	FBtr0308650	THADA-RC	5361	3.25942	5.20562e-06
FBgn0031183	CG14621	FBtr0077344	CG14621-RA	1546	3.23394	0.126065
FBgn0010909	msn	FBtr0072959	msn-RC	4268	3.16542	0.703402
FBgn0040305	MTF-1	FBtr0113323	MTF-1-RD	3872	3.12635	0.179692
FBgn0027338	Kap-alpha3	FBtr0082108	Kap-alpha3-RC	2663	3.11287	0.942414
FBgn0038965	mats	FBtr0345205	mats-RC	1096	3.11183	0.149336
FBgn0011766	E2f1	FBtr0084117	E2f1-RB	3150	3.10484	0.156184
FBgn0260941	app	FBtr0334103	app-RS	2679	3.10033	0.449308
FBgn0027615	CG6404	FBtr0076271	CG6404-RB	1815	3.08738	0.449308
FBgn0036356	CG10222	FBtr0075861	CG10222-RA	1074	3.07662	0.152707
FBgn0266347	nAChRalpha4	FBtr0308331	nAChRalpha4-RE	1509	3.0505	0.280079
FBgn0052772	CG32772	FBtr0342951	CG32772-RD	2145	3.044	0.65743
FBgn0264975	Nrg	FBtr0301764	Nrg-RF	5064	3.00446	0.672985
FBgn0030114	CG17754	FBtr0071316	CG17754-RA	2397	2.99228	0.832863
FBgn0024909	Taf7	FBtr0114520	Taf7-RB	1489	2.98796	0.483314
FBgn0035400	CG11537	FBtr0113133	CG11537-RE	3214	2.98672	0.531116
FBgn0261269	conv	FBtr0339967	conv-RB	3645	2.98641	5.20562e-06
FBgn0030685	Graf	FBtr0074198	Graf-RE	4304	2.98303	0.330013
FBgn0038197	foxo	FBtr0082887	foxo-RC	3548	2.97911	5.20562e-06
FBgn0036581	MED10	FBtr0333560	MED10-RC	638	2.96344	5.20562e-06
FBgn0027343	fz3	FBtr0070138	fz3-RA	2249	2.95365	5.20562e-06
FBgn0042138	CG18815	FBtr0076105	CG18815-RC	1181	2.9118	0.721419
FBgn0037332	Hcs	FBtr0345253	Hcs-RC	3991	2.897	0.985701
FBgn0031275	GABA-B-R3	FBtr0078001	GABA-B-R3-RA	5466	2.88637	5.20562e-06
FBgn0028979	tio	FBtr0089377	tio-RA	5594	2.88529	5.20562e-06
FBgn0005649	Rox8	FBtr0333201	Rox8-RG	3328	2.87672	0.158791
FBgn0030174	CG15312	FBtr0071422	CG15312-RB	1482	2.85498	0.778551
FBgn0030089	AP-1gamma	FBtr0071295	AP-1gamma-RA	4743	2.85139	0.291361
FBgn0053095	CG33095	FBtr0084774	CG33095-RA	3465	2.81156	0.280079
FBgn0010313	corto	FBtr0308118	corto-RB	3537	2.78368	0.27502
FBgn0038828	CG17270	FBtr0334723	CG17270-RB	1034	2.7756	5.20562e-06
FBgn0030447	CG2200	FBtr0340301	CG2200-RB	1224	2.7624	0.27502
FBgn0036850	Gem2	FBtr0330093	Gem2-RB	1123	2.74186	0.349361
FBgn0003430	slp1	FBtr0077499	slp1-RA	1425	2.73227	5.20562e-06
FBgn0037110	ORMDL	FBtr0078423	ORMDL-RA	674	2.72177	5.20562e-06
FBgn0028421	Kap3	FBtr0343146	Kap3-RN	3768	2.72171	5.20562e-06
FBgn0030701	CG16952	FBtr0074115	CG16952-RB	3667	2.70857	0.149336
FBgn0030420	CG12717	FBtr0073704	CG12717-RA	2734	2.66796	5.20562e-06
FBgn0031041	CG12788	FBtr0332487	CG12788-RC	1704	2.65364	0.152707
FBgn0001215	Hrb98DE	FBtr0085303	Hrb98DE-RF	1530	2.62145	5.20562e-06
FBgn0262736	Vha16-1	FBtr0086152	Vha16-1-RC	2981	2.61748	5.20562e-06
FBgn0013718	nuf	FBtr0100039	nuf-RC	3446	2.61006	0.8265
FBgn0020278	loco	FBtr0304669	loco-RF	3133	2.59364	0.13639
FBgn0033886	Rpn13	FBtr0114495	Rpn13-RF	1390	2.57728	0.8265
FBgn0035639	kri	FBtr0310534	kri-RC	1191	2.56236	5.20562e-06
FBgn0003495	spz	FBtr0085138	spz-RB	2050	2.56004	0.280079
FBgn0262736	Vha16-1	FBtr0086150	Vha16-1-RA	2833	2.55995	5.20562e-06
FBgn0031213	galectin	FBtr0306540	galectin-RD	1430	2.52514	0.126065
FBgn0030868	CG12986	FBtr0074474	CG12986-RA	531	2.52075	5.20562e-06
FBgn0085322	CG34293	FBtr0112489	CG34293-RA	446	2.50721	5.20562e-06
FBgn0039532	Mtl	FBtr0085191	Mtl-RC	1197	2.50063	0.21376
FBgn0038683	CG11779	FBtr0083750	CG11779-RB	2679	2.49859	0.126065
FBgn0014417	CG13397	FBtr0079711	CG13397-RA	2741	2.45284	0.256896
FBgn0036502	CG7841	FBtr0075604	CG7841-RA	1377	2.43921	5.20562e-06
FBgn0053869	His4:CG33869	FBtr0091873	His4:CG33869-RA	526	2.43888	0.403819
FBgn0265137	Spn42Da	FBtr0086205	Spn42Da-RK	1789	2.42206	0.330013
FBgn0023097	bon	FBtr0334639	bon-RF	5778	2.41324	0.449308
FBgn0031992	Acbp1	FBtr0346463	Acbp1-RB	525	2.4053	0.280079
FBgn0037655	Kcmf1	FBtr0300743	Kcmf1-RD	2394	2.39966	0.152707
FBgn0024326	Mkk4	FBtr0081892	Mkk4-RA	2698	2.38738	0.642079
FBgn0033261	udd	FBtr0347555	udd-RB	1024	2.38199	0.158791
FBgn0040809	CG13465	FBtr0075674	CG13465-RA	602	2.37604	5.20562e-06
FBgn0032940	Mondo	FBtr0301464	Mondo-RM	4068	2.36648	0.465757
FBgn0040487	BobA	FBtr0075673	BobA-RA	627	2.35882	5.20562e-06
FBgn0034366	Atg7	FBtr0086711	Atg7-RB	1873	2.35445	0.170847
FBgn0066114	GlcAT-I	FBtr0070644	GlcAT-I-RA	1560	2.35353	5.20562e-06
FBgn0034158	CG5522	FBtr0087028	CG5522-RC	3516	2.34868	0.382835
FBgn0031052	CG14215	FBtr0345016	CG14215-RB	6514	2.34589	0.785835
FBgn0042175	CG18858	FBtr0332971	CG18858-RB	2029	2.33943	0.403819
FBgn0000411	D	FBtr0333035	D-RC	1928	2.32489	5.20562e-06
FBgn0028341	Ptpmeg2	FBtr0333427	Ptpmeg2-RI	2203	2.32182	0.785835
FBgn0031195	CG17600	FBtr0333713	CG17600-RC	973	2.31228	5.20562e-06
FBgn0029868	ND-B16.6	FBtr0070924	ND-B16.6-RA	957	2.31013	0.192125
FBgn0039663	CG2321	FBtr0085436	CG2321-RA	2148	2.30394	0.545053
FBgn0040212	Dhap-at	FBtr0330374	Dhap-at-RB	3441	2.29817	0.229236
FBgn0030672	CG9281	FBtr0074056	CG9281-RB	3205	2.2937	0.170847
FBgn0264305	CG43783	FBtr0331520	CG43783-RE	3434	2.29035	0.846922
FBgn0033224	Nop17l	FBtr0088902	Nop17l-RB	3510	2.28057	0.224858
FBgn0015268	Nap1	FBtr0305990	Nap1-RC	1376	2.27529	0.195081
FBgn0051716	Cnot4	FBtr0304112	Cnot4-RH	3963	2.26539	0.220584
FBgn0037070	CG11309	FBtr0078406	CG11309-RB	1430	2.26049	0.878965
FBgn0263051	CG43346	FBtr0306976	CG43346-RB	579	2.25831	5.20562e-06
FBgn0262582	cic	FBtr0305026	cic-RA	5167	2.25314	0.142102
FBgn0086361	alph	FBtr0085445	alph-RD	2417	2.25204	0.411308
FBgn0053502	CG33502	FBtr0070055	CG33502-RA	1060	2.24841	0.403819
FBgn0030931	Xrcc2	FBtr0074592	Xrcc2-RA	1132	2.2466	5.20562e-06
FBgn0033871	CG13339	FBtr0087632	CG13339-RA	662	2.22117	5.20562e-06
FBgn0040985	CG6115	FBtr0080959	CG6115-RA	727	2.21857	0.509645
FBgn0052428	CG32428	FBtr0078222	CG32428-RA	1213	2.20577	5.20562e-06
FBgn0000259	CkIIbeta	FBtr0100540	CkIIbeta-RF	1043	2.19465	0.161869
FBgn0043069	MESK4	FBtr0337059	MESK4-RB	1488	2.19408	0.465757
FBgn0040890	ksh	FBtr0300214	ksh-RB	435	2.18979	5.20562e-06
FBgn0037241	CG14646	FBtr0302339	CG14646-RB	1582	2.18061	0.269895
FBgn0035679	CG10467	FBtr0077063	CG10467-RA	1544	2.17482	5.20562e-06
FBgn0030872	Ucp4A	FBtr0339750	Ucp4A-RC	1693	2.16849	0.296093
FBgn0028789	Doc1	FBtr0076522	Doc1-RA	1526	2.16405	5.20562e-06
FBgn0053558	mim	FBtr0306614	mim-RH	4472	2.16268	0.8724
FBgn0039280	Mocs2B	FBtr0084782	Mocs2B-RA	1420	2.15807	5.20562e-06
FBgn0263120	Acsl	FBtr0100426	Acsl-RD	3452	2.15134	0.457087
FBgn0035534	mRpS6	FBtr0073288	mRpS6-RA	535	2.1495	0.34252
FBgn0039465	Tsp97E	FBtr0336726	Tsp97E-RE	1757	2.1493	0.483314
FBgn0028397	Tob	FBtr0310317	Tob-RE	3304	2.14857	0.158791
FBgn0035998	CG3437	FBtr0301032	CG3437-RB	1126	2.14844	5.20562e-06
FBgn0003742	tra2	FBtr0089616	tra2-RE	1460	2.13597	0.168237
FBgn0032014	CG7840	FBtr0079598	CG7840-RA	1156	2.12437	5.20562e-06
FBgn0036155	CG6163	FBtr0333387	CG6163-RB	1607	2.12436	0.174106
FBgn0030481	CG1662	FBtr0342624	CG1662-RB	1603	2.11777	5.20562e-06
FBgn0033902	eIF3m	FBtr0087579	eIF3m-RA	1590	2.11172	0.165641
FBgn0037655	Kcmf1	FBtr0300745	Kcmf1-RF	2417	2.10878	0.256896
FBgn0019662	qm	FBtr0076846	qm-RA	1934	2.10664	0.929464
FBgn0029502	COQ7	FBtr0070963	COQ7-RA	899	2.09877	5.20562e-06
FBgn0002873	mud	FBtr0308329	mud-RJ	7097	2.09287	0.252294
FBgn0027601	pdgy	FBtr0343521	pdgy-RD	2780	2.08972	0.738593
FBgn0016917	Stat92E	FBtr0089485	Stat92E-RC	4008	2.08939	0.376268
FBgn0022160	Gpo1	FBtr0087307	Gpo1-RC	2426	2.08459	0.142102
FBgn0000721	for	FBtr0089312	for-RI	4581	2.08351	0.280079
FBgn0032889	CG9331	FBtr0081417	CG9331-RB	1172	2.08069	0.355029
FBgn0051274	CG31274	FBtr0083369	CG31274-RB	1399	2.07276	0.545053
FBgn0052675	Tango5	FBtr0300569	Tango5-RD	2207	2.06982	0.18537
FBgn0029891	Pink1	FBtr0100413	Pink1-RC	2865	2.06295	0.209592
FBgn0031818	CG9536	FBtr0079267	CG9536-RA	1944	2.05995	5.20562e-06
FBgn0013278	Hsp70Bb	FBtr0082637	Hsp70Bb-RA	2347	2.05951	0.349361
FBgn0034803	CG9849	FBtr0302895	CG9849-RB	920	2.04807	5.20562e-06
FBgn0031233	Tbc1d15-17	FBtr0332338	Tbc1d15-17-RB	3129	2.04618	0.195081
FBgn0045063	fdl	FBtr0087946	fdl-RC	3062	2.04566	0.952894
FBgn0051158	Efa6	FBtr0113396	Efa6-RD	6262	2.04547	0.619158
FBgn0264560	garz	FBtr0305075	garz-RC	5634	2.04298	0.619158
FBgn0026630	nes	FBtr0075020	nes-RB	1668	2.04272	0.240862
FBgn0042199	CG13713	FBtr0073346	CG13713-RA	458	2.03944	0.152707
FBgn0015558	tty	FBtr0329900	tty-RC	3078	2.03818	0.179692
FBgn0025776	ind	FBtr0333875	ind-RB	1126	2.03432	5.20562e-06
FBgn0010226	GstS1	FBtr0087006	GstS1-RA	1764	2.02103	0.738593
FBgn0039908	Asator	FBtr0332904	Asator-RG	3750	2.01753	0.142102
FBgn0032150	CG13123	FBtr0079917	CG13123-RA	1094	2.00672	0.224858
FBgn0035248	CG13919	FBtr0072759	CG13919-RA	517	2.00569	0.126065
FBgn0016687	Nurf-38	FBtr0305985	Nurf-38-RC	1281	1.99707	0.165641
FBgn0004404	RpS14b	FBtr0071096	RpS14b-RA	594	1.99693	0.747887
FBgn0263993	CG43736	FBtr0330264	CG43736-RB	4330	1.99476	5.20562e-06
FBgn0262736	Vha16-1	FBtr0086153	Vha16-1-RD	2816	1.99408	5.20562e-06
FBgn0028523	CG5888	FBtr0080880	CG5888-RA	1881	1.9867	0.642079
FBgn0030187	Ipod	FBtr0346336	Ipod-RB	1593	1.98451	0.195081
FBgn0037261	CG9775	FBtr0336457	CG9775-RE	1966	1.9781	0.562225
FBgn0029854	CG3566	FBtr0089870	CG3566-RB	550	1.97755	5.20562e-06
FBgn0031818	CG9536	FBtr0303229	CG9536-RB	1888	1.97429	5.20562e-06
FBgn0016038	Vsp37A	FBtr0089724	Vsp37A-RD	1331	1.9709	0.860178
FBgn0031091	Phf7	FBtr0333546	Phf7-RB	2211	1.96942	0.263159
FBgn0266410	CG45050	FBtr0344363	CG45050-RG	6468	1.96695	0.483314
FBgn0003742	tra2	FBtr0089617	tra2-RA	1376	1.966	5.20562e-06
FBgn0036502	CG7841	FBtr0334085	CG7841-RB	1628	1.95995	5.20562e-06
FBgn0039135	CG13603	FBtr0084510	CG13603-RA	1046	1.94409	5.20562e-06
FBgn0026375	RhoGAPp190	FBtr0333659	RhoGAPp190-RD	7301	1.94042	0.165641
FBgn0038533	CG7523	FBtr0083490	CG7523-RA	1134	1.93847	5.20562e-06
FBgn0014010	Rab5	FBtr0077794	Rab5-RF	1719	1.93817	0.269895
FBgn0066304	Rpp20	FBtr0091935	Rpp20-RA	1244	1.93542	0.145538
FBgn0031719	CG18269	FBtr0079103	CG18269-RA	919	1.9338	5.20562e-06
FBgn0003654	sw	FBtr0089409	sw-RM	2873	1.92361	0.915104
FBgn0010382	CycE	FBtr0080773	CycE-RE	3703	1.92223	0.240862
FBgn0046247	CG5938	FBtr0085161	CG5938-RA	1255	1.92204	0.8724
FBgn0260439	Pp2A-29B	FBtr0100533	Pp2A-29B-RB	2342	1.92194	0.181317
FBgn0038739	CG4686	FBtr0083816	CG4686-RA	1195	1.91623	0.355029
FBgn0037731	CG18542	FBtr0082084	CG18542-RA	1263	1.91208	0.3968
FBgn0260392	CG42518	FBtr0300663	CG42518-RB	825	1.90768	0.220584
FBgn0041164	armi	FBtr0309841	armi-RD	4151	1.90302	0.309732
FBgn0266409	CG45049	FBtr0344362	CG45049-RF	1516	1.90016	0.176514
FBgn0031988	CG8668	FBtr0079576	CG8668-RA	2889	1.89715	5.20562e-06
FBgn0015222	Fer1HCH	FBtr0085632	Fer1HCH-RB	1135	1.89601	0.263159
FBgn0003742	tra2	FBtr0089619	tra2-RC	1568	1.89532	5.20562e-06
FBgn0033476	oys	FBtr0339416	oys-RB	3850	1.89304	0.878965
FBgn0025633	CG13366	FBtr0110791	CG13366-RB	4398	1.88909	0.403819
FBgn0085444	mute	FBtr0112692	mute-RD	3340	1.88038	5.20562e-06
FBgn0002638	Rcc1	FBtr0077074	Rcc1-RA	2365	1.87579	0.126065
FBgn0004167	kst	FBtr0073072	kst-RC	13783	1.87562	0.269895
FBgn0003256	rl	FBtr0345337	rl-RI	2072	1.87236	0.509645
FBgn0031434	insv	FBtr0344854	insv-RB	1335	1.8673	0.465757
FBgn0027779	VhaSFD	FBtr0335143	VhaSFD-RE	2503	1.8622	0.21376
FBgn0039790	CG2246	FBtr0302610	CG2246-RM	1630	1.86039	0.152707
FBgn0029929	CG4593	FBtr0071009	CG4593-RA	1123	1.85916	5.20562e-06
FBgn0034641	mahj	FBtr0304728	mahj-RB	5346	1.85151	0.368863
FBgn0025700	CG5885	FBtr0445309	CG5885-RB	1044	1.84801	0.20663
FBgn0034808	CG9896	FBtr0071988	CG9896-RA	2043	1.84569	5.20562e-06
FBgn0031359	Rim2	FBtr0306167	Rim2-RD	2352	1.84494	0.240862
FBgn0044028	Notum	FBtr0075435	Notum-RA	3792	1.84445	5.20562e-06
FBgn0259238	CG42336	FBtr0299853	CG42336-RB	509	1.84396	5.20562e-06
FBgn0030794	CG13005	FBtr0074334	CG13005-RA	2027	1.84259	5.20562e-06
FBgn0052343	Atac3	FBtr0299831	Atac3-RB	2263	1.84211	0.349361
FBgn0035675	CG6610	FBtr0332060	CG6610-RC	520	1.84014	0.152707
FBgn0032147	IP3K1	FBtr0307204	IP3K1-RB	1417	1.83869	0.149336
FBgn0266409	CG45049	FBtr0344360	CG45049-RC	3708	1.83814	0.323524
FBgn0042125	CG18787	FBtr0321267	CG18787-RB	1386	1.83804	5.20562e-06
FBgn0011476	l(3)neo43	FBtr0334696	l(3)neo43-RC	627	1.83699	5.20562e-06
FBgn0032877	CG2617	FBtr0081391	CG2617-RA	1262	1.83662	0.13639
FBgn0261802	CG42748	FBtr0333742	CG42748-RJ	6550	1.83343	0.149336
FBgn0082598	akirin	FBtr0302545	akirin-RE	1127	1.83179	0.263159
FBgn0031378	CG15362	FBtr0077814	CG15362-RA	813	1.82988	5.20562e-06
FBgn0038197	foxo	FBtr0305052	foxo-RF	3708	1.82898	5.20562e-06
FBgn0035432	ZnT63C	FBtr0073054	ZnT63C-RA	1969	1.82281	0.202688
FBgn0039543	CG12428	FBtr0085236	CG12428-RB	2409	1.81983	0.330013
FBgn0031493	Sf3b2	FBtr0335484	Sf3b2-RB	2684	1.81537	0.224858
FBgn0032197	CG5694	FBtr0079953	CG5694-RA	2132	1.81466	5.20562e-06
FBgn0266724	Trs20	FBtr0075491	Trs20-RA	575	1.81385	5.20562e-06
FBgn0259203	CG42307	FBtr0299693	CG42307-RC	492	1.81332	0.158791
FBgn0004054	zen2	FBtr0081671	zen2-RA	935	1.81072	0.181317
FBgn0263236	SP1029	FBtr0334868	SP1029-RD	3198	1.81052	0.199262
FBgn0033212	LRR	FBtr0300779	LRR-RC	5968	1.80566	0.20663
FBgn0031053	CG14223	FBtr0332890	CG14223-RB	2801	1.80534	0.126065
FBgn0029763	Usp16-45	FBtr0340461	Usp16-45-RE	4093	1.80273	0.309732
FBgn0001624	dlg1	FBtr0073483	dlg1-RC	2554	1.79972	0.611625
FBgn0037715	CG9399	FBtr0082109	CG9399-RB	1008	1.79228	0.209592
FBgn0038418	pad	FBtr0301514	pad-RB	3276	1.79225	5.20562e-06
FBgn0030478	CG1640	FBtr0073771	CG1640-RD	2511	1.79193	0.382835
FBgn0037470	Tailor	FBtr0081641	Tailor-RA	1792	1.78701	0.49271
FBgn0024698	Cpsf160	FBtr0089257	Cpsf160-RB	4504	1.78638	0.703402
FBgn0037720	CG8312	FBtr0334616	CG8312-RC	3476	1.78101	5.20562e-06
FBgn0000492	Dr	FBtr0085441	Dr-RA	2552	1.77799	0.126065
FBgn0003495	spz	FBtr0085139	spz-RC	1909	1.77403	0.303186
FBgn0010415	Sdc	FBtr0342893	Sdc-RI	3982	1.77361	0.509645
FBgn0033547	CG12935	FBtr0332886	CG12935-RB	918	1.76991	5.20562e-06
FBgn0030245	CG1637	FBtr0339836	CG1637-RD	2199	1.76763	0.202688
FBgn0285949	RpL31	FBtr0088527	RpL31-RB	577	1.767	0.170847
FBgn0030673	CG15601	FBtr0339683	CG15601-RB	1485	1.76606	5.20562e-06
FBgn0003748	Treh	FBtr0071536	Treh-RD	2992	1.76125	0.819738
FBgn0028397	Tob	FBtr0301652	Tob-RC	7852	1.76096	5.20562e-06
FBgn0032202	REPTOR-BP	FBtr0089735	REPTOR-BP-RD	634	1.759	0.18537
FBgn0032715	CG17597	FBtr0081121	CG17597-RA	1354	1.75802	5.20562e-06
FBgn0000606	eve	FBtr0088390	eve-RA	1406	1.75107	0.188944
FBgn0037134	CG7407	FBtr0078440	CG7407-RA	1049	1.74935	5.20562e-06
FBgn0033226	CG1882	FBtr0088835	CG1882-RC	1653	1.747	0.2168
FBgn0033252	CG12769	FBtr0339281	CG12769-RC	4740	1.74417	0.585274
FBgn0035639	kri	FBtr0310533	kri-RB	1045	1.74367	5.20562e-06
FBgn0011725	twin	FBtr0084569	twin-RC	2586	1.74287	0.753969
FBgn0011704	RnrS	FBtr0088046	RnrS-RA	1593	1.74091	5.20562e-06
FBgn0061492	loj	FBtr0301447	loj-RE	1084	1.73531	0.509645
FBgn0037551	Arl8	FBtr0081794	Arl8-RA	916	1.73276	0.296093
FBgn0033683	CG18343	FBtr0333061	CG18343-RB	630	1.73265	5.20562e-06
FBgn0037879	scpr-C	FBtr0082351	scpr-C-RA	910	1.7293	0.156184
FBgn0031091	Phf7	FBtr0070027	Phf7-RA	2221	1.72865	5.20562e-06
FBgn0261554	CG42672	FBtr0302702	CG42672-RL	5454	1.72367	0.878965
FBgn0001220	Hsc70-5	FBtr0087568	Hsc70-5-RA	2922	1.72238	0.594466
FBgn0036958	CG17233	FBtr0306326	CG17233-RE	3458	1.72186	0.545053
FBgn0037017	CG4074	FBtr0345811	CG4074-RB	1157	1.72051	0.229236
FBgn0036958	CG17233	FBtr0306329	CG17233-RH	3499	1.72016	0.634122
FBgn0010825	Gug	FBtr0076616	Gug-RA	8151	1.71958	0.240862
FBgn0264491	how	FBtr0301401	how-RD	3884	1.71705	0.229236
FBgn0027335	Rip11	FBtr0301545	Rip11-RB	2329	1.71367	0.634122
FBgn0035106	rno	FBtr0072532	rno-RB	11796	1.71273	0.13639
FBgn0037603	CG11753	FBtr0081879	CG11753-RA	699	1.71176	5.20562e-06
FBgn0015664	Dref	FBtr0079889	Dref-RA	2872	1.7116	5.20562e-06
FBgn0066101	LpR1	FBtr0301467	LpR1-RH	3975	1.70035	0.209592
FBgn0002283	l(3)73Ah	FBtr0307336	l(3)73Ah-RB	1322	1.70028	5.20562e-06
FBgn0052512	CG32512	FBtr0332848	CG32512-RC	1412	1.69997	0.411308
FBgn0030703	MSBP	FBtr0301598	MSBP-RB	1420	1.69897	5.20562e-06
FBgn0003165	pum	FBtr0305197	pum-RF	4655	1.69666	0.2168
FBgn0015790	Rab11	FBtr0084010	Rab11-RA	1815	1.69193	0.156184
FBgn0020235	ATPsyngamma	FBtr0085539	ATPsyngamma-RA	1080	1.69169	0.531116
FBgn0032029	CG17292	FBtr0079648	CG17292-RB	1397	1.68715	0.188944
FBgn0028394	CG17834	FBtr0079689	CG17834-RD	1164	1.68482	0.747887
FBgn0035159	CG13896	FBtr0072602	CG13896-RA	1000	1.68457	0.330013
FBgn0035793	CG7546	FBtr0290026	CG7546-RD	5282	1.68404	0.619158
FBgn0005427	ewg	FBtr0332976	ewg-RL	4025	1.68394	0.957411
FBgn0030608	Lsd-2	FBtr0110968	Lsd-2-RB	2097	1.68354	5.20562e-06
FBgn0028686	Rpt3	FBtr0346274	Rpt3-RB	1553	1.68342	0.376268
FBgn0028664	VhaM9.7-c	FBtr0073256	VhaM9.7-c-RA	848	1.68112	5.20562e-06
FBgn0029854	CG3566	FBtr0089869	CG3566-RC	1607	1.68061	5.20562e-06
FBgn0086768	Pcmt	FBtr0339519	Pcmt-RC	998	1.67994	0.195081
FBgn0003612	Su(var)2-10	FBtr0302507	Su(var)2-10-RL	2150	1.67918	0.791891
FBgn0052000	anne	FBtr0089448	anne-RB	4435	1.6784	0.336441
FBgn0036173	CG7394	FBtr0076098	CG7394-RA	534	1.67425	5.20562e-06
FBgn0000463	Dl	FBtr0304658	Dl-RC	4581	1.66838	0.13639
FBgn0000719	fog	FBtr0333181	fog-RE	3825	1.6676	0.296093
FBgn0003302	rux	FBtr0070889	rux-RA	1420	1.6664	0.20663
FBgn0052016	4E-T	FBtr0089229	4E-T-RB	3501	1.66234	0.915104
FBgn0264816	koko	FBtr0334147	koko-RC	1247	1.66101	0.240862
FBgn0038976	Pfdn5	FBtr0301486	Pfdn5-RB	894	1.65625	0.179692
FBgn0285947	RpS10b	FBtr0344339	RpS10b-RE	651	1.65462	0.545053
FBgn0035558	CG11357	FBtr0073310	CG11357-RA	2686	1.65163	0.2168
FBgn0061515	endos	FBtr0075783	endos-RB	852	1.65091	5.20562e-06
FBgn0020910	RpL3	FBtr0336783	RpL3-RH	1610	1.64943	5.20562e-06
FBgn0032404	RpL7-like	FBtr0346426	RpL7-like-RC	958	1.6486	0.594466
FBgn0000251	cad	FBtr0081413	cad-RB	2353	1.64823	5.20562e-06
FBgn0002121	l(2)gl	FBtr0330655	l(2)gl-RK	5281	1.64449	0.946877
FBgn0030242	sofe	FBtr0346273	sofe-RB	2414	1.63778	0.672985
FBgn0027108	Inx2	FBtr0071006	Inx2-RB	2758	1.63685	0.791891
FBgn0015558	tty	FBtr0077224	tty-RA	3927	1.63639	0.142102
FBgn0030740	CG9917	FBtr0331756	CG9917-RB	1726	1.63411	0.538029
FBgn0039757	RpS7	FBtr0339183	RpS7-RE	813	1.63264	5.20562e-06
FBgn0032445	CG6153	FBtr0340541	CG6153-RC	821	1.63095	5.20562e-06
FBgn0035965	Use1	FBtr0076537	Use1-RA	980	1.6291	5.20562e-06
FBgn0026576	Pisd	FBtr0084538	Pisd-RB	1830	1.6278	0.554553
FBgn0034231	APC10	FBtr0086951	APC10-RA	867	1.61891	5.20562e-06
FBgn0011476	l(3)neo43	FBtr0301089	l(3)neo43-RB	460	1.61843	5.20562e-06
FBgn0031971	Sirup	FBtr0343382	Sirup-RC	727	1.61372	0.762127
FBgn0035639	kri	FBtr0077112	kri-RA	1106	1.61242	5.20562e-06
FBgn0044323	Cka	FBtr0079537	Cka-RB	5135	1.61048	0.181317
FBgn0030447	CG2200	FBtr0073721	CG2200-RA	1055	1.60728	5.20562e-06
FBgn0036144	GlcAT-P	FBtr0306255	GlcAT-P-RE	3161	1.60572	5.20562e-06
FBgn0034138	RpS15	FBtr0087124	RpS15-RB	726	1.60532	0.176514
FBgn0033373	CG8080	FBtr0310145	CG8080-RD	1749	1.60342	0.509645
FBgn0031491	alpha4GT1	FBtr0077670	alpha4GT1-RA	1714	1.60297	5.20562e-06
FBgn0005648	Pabp2	FBtr0088785	Pabp2-RA	1869	1.60025	5.20562e-06
FBgn0032076	CG9510	FBtr0340263	CG9510-RD	1640	1.59503	0.240862
FBgn0028397	Tob	FBtr0074255	Tob-RA	3639	1.59497	5.20562e-06
FBgn0004828	His3.3B	FBtr0071346	His3.3B-RB	1537	1.59324	0.39016
FBgn0037535	PIG-H	FBtr0335224	PIG-H-RB	1091	1.59209	0.149336
FBgn0000533	ea	FBtr0334588	ea-RB	1527	1.59205	0.165641
FBgn0030502	tth	FBtr0346118	tth-RC	3138	1.59052	0.229236
FBgn0015393	hoip	FBtr0335494	hoip-RB	607	1.58724	0.8265
FBgn0031677	CG14036	FBtr0079029	CG14036-RA	438	1.5862	5.20562e-06
FBgn0001139	gro	FBtr0337057	gro-RI	3918	1.58586	0.316147
FBgn0027079	ValRS	FBtr0087734	ValRS-RB	3360	1.5815	0.885055
FBgn0003742	tra2	FBtr0089620	tra2-RF	1381	1.57804	5.20562e-06
FBgn0261844	pre-mod(mdg4)-V	FBtr0445402	pre-mod(mdg4)-V-RC	2121	1.57138	0.256896
FBgn0015218	eIF4E1	FBtr0076491	eIF4E1-RG	1358	1.57048	5.20562e-06
FBgn0040056	CG17698	FBtr0333914	CG17698-RF	2560	1.56937	0.457087
FBgn0025633	CG13366	FBtr0339431	CG13366-RD	4307	1.569	0.21376
FBgn0050010	CG30010	FBtr0332914	CG30010-RB	960	1.56851	0.2168
FBgn0016120	ATPsynD	FBtr0083727	ATPsynD-RB	694	1.5685	0.812666
FBgn0025335	Cpes	FBtr0343277	Cpes-RD	1421	1.5677	0.168237
FBgn0036144	GlcAT-P	FBtr0100422	GlcAT-P-RC	3266	1.56428	5.20562e-06
FBgn0033712	mIF3	FBtr0339628	mIF3-RB	1499	1.56422	0.20663
FBgn0031359	Rim2	FBtr0077910	Rim2-RA	1762	1.56125	5.20562e-06
FBgn0263108	BtbVII	FBtr0332096	BtbVII-RI	4042	1.55261	0.382835
FBgn0039141	spas	FBtr0321260	spas-RC	3147	1.55	0.323524
FBgn0033550	CG12341	FBtr0088251	CG12341-RA	1100	1.54827	5.20562e-06
FBgn0263120	Acsl	FBtr0100430	Acsl-RH	3887	1.5457	0.602278
FBgn0030679	CG8206	FBtr0074085	CG8206-RA	1013	1.53462	0.142102
FBgn0036958	CG17233	FBtr0302113	CG17233-RD	2753	1.53448	0.285479
FBgn0265998	Doa	FBtr0299749	Doa-RT	2971	1.53289	0.957411
FBgn0261793	Trf2	FBtr0300577	Trf2-RF	9866	1.53197	0.209592
FBgn0082598	akirin	FBtr0076849	akirin-RB	2080	1.53169	0.291361
FBgn0010052	Jhe	FBtr0340021	Jhe-RC	1967	1.52832	0.168237
FBgn0000662	fl(2)d	FBtr0087648	fl(2)d-RB	2248	1.52761	0.309732
FBgn0030642	CG15642	FBtr0074076	CG15642-RA	1261	1.52593	0.303186
FBgn0040467	Dlip1	FBtr0333472	Dlip1-RB	694	1.52154	0.149336
FBgn0038877	CG3308	FBtr0084102	CG3308-RA	2124	1.51947	5.20562e-06
FBgn0085432	pan	FBtr0089161	pan-RA	4129	1.5157	0.538029
FBgn0032390	dgt2	FBtr0080285	dgt2-RA	842	1.51467	5.20562e-06
FBgn0030294	Pa1	FBtr0073456	Pa1-RA	1628	1.51401	5.20562e-06
FBgn0029860	CG15891	FBtr0346642	CG15891-RD	829	1.51318	0.209592
FBgn0021764	sdk	FBtr0070133	sdk-RA	8843	1.51243	0.634122
FBgn0033459	CG12744	FBtr0088377	CG12744-RA	906	1.51192	5.20562e-06
FBgn0028369	kirre	FBtr0309498	kirre-RC	4031	1.51191	0.642079
FBgn0035678	CG10469	FBtr0077064	CG10469-RA	1067	1.51169	5.20562e-06
FBgn0023441	fus	FBtr0087343	fus-RF	5243	1.51165	0.619158
FBgn0000568	Eip75B	FBtr0347013	Eip75B-RG	3876	1.51146	0.483314
FBgn0039757	RpS7	FBtr0089425	RpS7-RD	797	1.50994	0.946877
FBgn0052016	4E-T	FBtr0310651	4E-T-RG	3526	1.50992	0.168237
FBgn0061515	endos	FBtr0333052	endos-RE	1356	1.50801	0.168237
FBgn0010473	tutl	FBtr0301864	tutl-RG	5127	1.50781	0.672985
FBgn0002561	l(1)sc	FBtr0070074	l(1)sc-RA	1097	1.50652	5.20562e-06
FBgn0035346	CG1146	FBtr0344219	CG1146-RD	1882	1.50507	0.21376
FBgn0035824	CG8281	FBtr0076748	CG8281-RA	1301	1.50494	5.20562e-06
FBgn0037234	CG9795	FBtr0078907	CG9795-RA	2693	1.5048	0.174106
FBgn0052428	CG32428	FBtr0300452	CG32428-RB	1804	1.50386	5.20562e-06
FBgn0034946	CG3065	FBtr0072154	CG3065-RB	1657	1.50159	5.20562e-06
FBgn0027552	CG10863	FBtr0073171	CG10863-RA	1089	1.5003	5.20562e-06
FBgn0034946	CG3065	FBtr0072153	CG3065-RC	1859	1.49898	0.152707
FBgn0035335	mRpL23	FBtr0072900	mRpL23-RA	597	1.49647	0.936544
FBgn0283510	Pal1	FBtr0088385	Pal1-RA	2621	1.49553	0.524191
FBgn0035944	CG5021	FBtr0301139	CG5021-RC	1088	1.49519	0.174106
FBgn0050499	Rpe	FBtr0088954	Rpe-RA	1060	1.49469	0.224858
FBgn0031238	CG3645	FBtr0078141	CG3645-RB	1753	1.4944	0.39016
FBgn0020255	Ran	FBtr0073472	Ran-RA	1667	1.49355	0.602278
FBgn0011818	oaf	FBtr0077779	oaf-RC	1734	1.49288	0.256896
FBgn0265767	zyd	FBtr0113769	zyd-RD	2460	1.49244	0.3968
FBgn0035444	CG12012	FBtr0073076	CG12012-RA	880	1.49213	5.20562e-06
FBgn0045862	btz	FBtr0085221	btz-RB	3021	1.49052	0.161869
FBgn0035888	CG7120	FBtr0307376	CG7120-RD	2641	1.48853	0.126065
FBgn0011230	poe	FBtr0079545	poe-RA	16216	1.48842	0.602278
FBgn0041092	tai	FBtr0303871	tai-RD	8290	1.48795	0.852888
FBgn0000077	amx	FBtr0307281	amx-RB	1211	1.48489	5.20562e-06
FBgn0020309	crol	FBtr0080263	crol-RC	5642	1.47991	0.20663
FBgn0042693	wrd	FBtr0305033	wrd-RM	2280	1.47884	0.229236
FBgn0262103	Sik3	FBtr0340388	Sik3-RD	6278	1.47812	0.156184
FBgn0014877	Roe1	FBtr0087675	Roe1-RA	1065	1.47664	5.20562e-06
FBgn0000578	ena	FBtr0100174	ena-RD	2878	1.47463	0.27502
FBgn0003435	sm	FBtr0308792	sm-RV	3190	1.47189	0.21376
FBgn0039261	Ythdf	FBtr0084794	Ythdf-RA	2965	1.46872	0.785835
FBgn0000017	Abl	FBtr0330136	Abl-RI	6060	1.46744	0.619158
FBgn0031664	CG8892	FBtr0079045	CG8892-RC	2007	1.466	0.199262
FBgn0038608	WRNexo	FBtr0339976	WRNexo-RC	1495	1.46349	0.545053
FBgn0259238	CG42336	FBtr0303157	CG42336-RF	901	1.46066	0.174106
FBgn0037715	CG9399	FBtr0334657	CG9399-RE	1108	1.46003	0.531116
FBgn0031161	CG15445	FBtr0310643	CG15445-RG	2216	1.45723	0.27502
FBgn0021875	Zfrp8	FBtr0343432	Zfrp8-RB	1090	1.45387	0.188944
FBgn0034091	mrj	FBtr0087194	mrj-RB	2126	1.45092	5.20562e-06
FBgn0032231	CG5056	FBtr0080003	CG5056-RA	1255	1.45091	5.20562e-06
FBgn0037922	CG14711	FBtr0082416	CG14711-RA	1319	1.45058	5.20562e-06
FBgn0035964	Dhpr	FBtr0100532	Dhpr-RC	1087	1.4495	5.20562e-06
FBgn0053180	Ranbp16	FBtr0340311	Ranbp16-RH	3707	1.44832	0.545053
FBgn0031458	aph-1	FBtr0077716	aph-1-RA	863	1.448	0.634122
FBgn0029753	CG4198	FBtr0340475	CG4198-RB	1864	1.44457	0.501434
FBgn0021764	sdk	FBtr0070130	sdk-RD	8960	1.44416	0.602278
FBgn0030482	CG1673	FBtr0073777	CG1673-RA	2510	1.44251	5.20562e-06
FBgn0033810	CG4646	FBtr0345470	CG4646-RB	797	1.43924	0.233605
FBgn0036058	CG6707	FBtr0076356	CG6707-RA	1954	1.43774	5.20562e-06
FBgn0030028	Corp	FBtr0307283	Corp-RB	1216	1.43749	0.240862
FBgn0010105	comm	FBtr0075579	comm-RA	1678	1.43358	5.20562e-06
FBgn0035252	CG7970	FBtr0072762	CG7970-RA	889	1.43331	0.179692
FBgn0037720	CG8312	FBtr0082075	CG8312-RA	4099	1.43328	5.20562e-06
FBgn0036918	Pfdn6	FBtr0330181	Pfdn6-RB	847	1.43286	0.142102
FBgn0035850	Atg18a	FBtr0076691	Atg18a-RA	2097	1.4321	0.368863
FBgn0042180	CG18870	FBtr0071688	CG18870-RA	2019	1.43039	5.20562e-06
FBgn0040385	CG12496	FBtr0070462	CG12496-RA	1537	1.43008	0.2168
FBgn0067622	LSm-4	FBtr0091657	LSm-4-RB	1578	1.42949	5.20562e-06
FBgn0032293	Dpy-30L1	FBtr0080112	Dpy-30L1-RA	655	1.42864	5.20562e-06
FBgn0259682	Jabba	FBtr0299943	Jabba-RC	2029	1.42507	0.20663
FBgn0038976	Pfdn5	FBtr0084257	Pfdn5-RA	657	1.42457	5.20562e-06
FBgn0036847	CNPYb	FBtr0075034	CNPYb-RA	1328	1.42134	5.20562e-06
FBgn0029819	Usp30	FBtr0070828	Usp30-RA	2436	1.42109	0.252294
FBgn0039209	REPTOR	FBtr0084673	REPTOR-RD	3684	1.4194	0.240862
FBgn0035252	CG7970	FBtr0346821	CG7970-RC	1270	1.41856	0.634122
FBgn0000166	bcd	FBtr0081666	bcd-RE	2536	1.41784	0.501434
FBgn0261068	LSm7	FBtr0343770	LSm7-RC	544	1.41761	0.149336
FBgn0034368	zda	FBtr0345424	zda-RD	1780	1.41628	0.27502
FBgn0083952	CG34116	FBtr0110816	CG34116-RA	796	1.41604	5.20562e-06
FBgn0085271	CG34242	FBtr0300028	CG34242-RB	343	1.41594	0.152707
FBgn0039764	CG15535	FBtr0346511	CG15535-RB	828	1.41574	0.13639
FBgn0026379	Pten	FBtr0089905	Pten-RA	2568	1.41447	0.18537
FBgn0030791	CG9132	FBtr0306801	CG9132-RC	1792	1.41432	0.483314
FBgn0034051	Mlf	FBtr0302149	Mlf-RE	2112	1.4139	0.309732
FBgn0263395	hppy	FBtr0086504	hppy-RA	5080	1.4133	0.181317
FBgn0032172	CG5850	FBtr0303901	CG5850-RC	2935	1.41184	0.382835
FBgn0038545	pasi1	FBtr0083513	pasi1-RA	816	1.4093	5.20562e-06
FBgn0263256	CG43394	FBtr0308299	CG43394-RB	3496	1.4031	0.2168
FBgn0036152	CG6175	FBtr0333389	CG6175-RD	3956	1.40305	0.179692
FBgn0040239	bc10	FBtr0077084	bc10-RA	1380	1.40231	5.20562e-06
FBgn0036932	CG14184	FBtr0074872	CG14184-RA	759	1.40195	5.20562e-06
FBgn0032642	CG5110	FBtr0306162	CG5110-RB	729	1.40125	0.18537
FBgn0029929	CG4593	FBtr0343331	CG4593-RB	889	1.40088	5.20562e-06
FBgn0036777	CG7341	FBtr0075123	CG7341-RA	1436	1.39587	5.20562e-06
FBgn0013750	Arf51F	FBtr0087376	Arf51F-RB	1323	1.39419	5.20562e-06
FBgn0085192	CG34163	FBtr0112354	CG34163-RA	478	1.39287	0.158791
FBgn0033906	ReepB	FBtr0302453	ReepB-RD	846	1.39223	0.165641
FBgn0038197	foxo	FBtr0082886	foxo-RB	3939	1.39094	0.403819
FBgn0037440	CRAT	FBtr0110774	CRAT-RB	2283	1.38946	0.936544
FBgn0003963	ush	FBtr0333012	ush-RD	4242	1.38943	0.86713
FBgn0033092	CG9422	FBtr0086121	CG9422-RC	1388	1.38873	5.20562e-06
FBgn0032751	CG17343	FBtr0081151	CG17343-RA	571	1.38861	5.20562e-06
FBgn0033665	Zip48C	FBtr0088038	Zip48C-RA	1878	1.38771	5.20562e-06
FBgn0037610	CG8043	FBtr0081902	CG8043-RA	1254	1.38665	5.20562e-06
FBgn0031534	Snx1	FBtr0077517	Snx1-RA	2028	1.38575	5.20562e-06
FBgn0042127	CG18789	FBtr0080315	CG18789-RA	1389	1.38487	0.126065
FBgn0261793	Trf2	FBtr0333750	Trf2-RI	7034	1.38433	0.578465
FBgn0030693	CG8974	FBtr0074187	CG8974-RB	1389	1.38241	0.330013
FBgn0283658	muc	FBtr0332528	muc-RE	2147	1.37949	0.672985
FBgn0000533	ea	FBtr0083083	ea-RA	1430	1.37921	5.20562e-06
FBgn0063492	GstE8	FBtr0086676	GstE8-RA	758	1.37834	0.585274
FBgn0261383	IntS6	FBtr0070842	IntS6-RB	5767	1.37753	0.336441
FBgn0031359	Rim2	FBtr0305618	Rim2-RC	2396	1.37752	5.20562e-06
FBgn0015338	CG5861	FBtr0080850	CG5861-RA	1126	1.37713	5.20562e-06
FBgn0261674	CG42709	FBtr0302981	CG42709-RB	2212	1.37598	0.291361
FBgn0262975	cnc	FBtr0306745	cnc-RE	3550	1.3758	0.170847
FBgn0000251	cad	FBtr0081412	cad-RA	2516	1.37512	0.252294
FBgn0030174	CG15312	FBtr0071421	CG15312-RA	1824	1.37486	0.256896
FBgn0036342	CG11279	FBtr0075887	CG11279-RA	452	1.37478	5.20562e-06
FBgn0035601	Uev1A	FBtr0077155	Uev1A-RA	1196	1.37426	0.199262
FBgn0283509	Phm	FBtr0072202	Phm-RB	1439	1.37202	0.2168
FBgn0037350	CG2911	FBtr0113194	CG2911-RB	921	1.37196	5.20562e-06
FBgn0043884	mask	FBtr0345261	mask-RF	13190	1.37187	0.994186
FBgn0010926	l(3)07882	FBtr0347218	l(3)07882-RB	4315	1.37169	0.220584
FBgn0027579	mino	FBtr0085251	mino-RB	2687	1.3709	0.355029
FBgn0036255	Atg12	FBtr0300011	Atg12-RB	469	1.37029	5.20562e-06
FBgn0004838	Hrb27C	FBtr0079347	Hrb27C-RC	2256	1.36954	0.233605
FBgn0031874	CG13775	FBtr0343776	CG13775-RC	1648	1.36935	0.336441
FBgn0267650	pre-mod(mdg4)-AA	FBtr0347108	pre-mod(mdg4)-AA-RA	2367	1.3678	0.220584
FBgn0029117	Surf1	FBtr0076897	Surf1-RA	1055	1.36661	5.20562e-06
FBgn0052428	CG32428	FBtr0303381	CG32428-RC	1238	1.36487	5.20562e-06
FBgn0003310	S	FBtr0077994	S-RA	2267	1.36189	0.18537
FBgn0032489	CG15480	FBtr0080482	CG15480-RA	656	1.36046	0.296093
FBgn0003042	Pc	FBtr0078405	Pc-RA	2462	1.35984	5.20562e-06
FBgn0034897	Sesn	FBtr0072087	Sesn-RA	3097	1.35975	0.156184
FBgn0005631	robo1	FBtr0071922	robo1-RA	6392	1.35906	0.465757
FBgn0033259	CG11210	FBtr0088781	CG11210-RA	2863	1.35836	5.20562e-06
FBgn0042138	CG18815	FBtr0331545	CG18815-RE	1136	1.35813	0.126065
FBgn0264495	gpp	FBtr0303789	gpp-RD	8391	1.35716	0.181317
FBgn0015521	RpS21	FBtr0273293	RpS21-RE	494	1.35573	5.20562e-06
FBgn0039254	Nmnat	FBtr0473366	Nmnat-RD	1200	1.35544	0.13639
FBgn0004509	Fur1	FBtr0089984	Fur1-RC	3912	1.35491	0.161869
FBgn0028663	VhaM9.7-b	FBtr0078369	VhaM9.7-b-RA	699	1.35457	5.20562e-06
FBgn0032816	Nf-YB	FBtr0081289	Nf-YB-RA	928	1.35337	0.2168
FBgn0010314	Cks30A	FBtr0079799	Cks30A-RA	1147	1.35224	5.20562e-06
FBgn0000216	Brd	FBtr0075621	Brd-RA	532	1.35188	5.20562e-06
FBgn0040623	Spase12	FBtr0085435	Spase12-RA	493	1.35121	5.20562e-06
FBgn0000259	CkIIbeta	FBtr0308085	CkIIbeta-RJ	934	1.3497	0.192125
FBgn0259143	CG42258	FBtr0299559	CG42258-RD	1806	1.34885	0.280079
FBgn0015790	Rab11	FBtr0084011	Rab11-RB	1627	1.34881	5.20562e-06
FBgn0262736	Vha16-1	FBtr0086151	Vha16-1-RB	2798	1.34861	0.161869
FBgn0031458	aph-1	FBtr0335127	aph-1-RB	990	1.34856	5.20562e-06
FBgn0031312	Tango14	FBtr0331287	Tango14-RB	1198	1.34709	0.176514
FBgn0030673	CG15601	FBtr0074055	CG15601-RA	1078	1.346	5.20562e-06
FBgn0028746	CG18508	FBtr0345708	CG18508-RB	816	1.34545	0.170847
FBgn0051109	CG31109	FBtr0084791	CG31109-RA	870	1.34324	0.165641
FBgn0030749	AnxB11	FBtr0334038	AnxB11-RC	1429	1.34308	0.611625
FBgn0005590	scw	FBtr0081261	scw-RA	1342	1.34224	0.578465
FBgn0030109	CG12121	FBtr0071334	CG12121-RA	2954	1.34219	5.20562e-06
FBgn0037831	Cap-H2	FBtr0301310	Cap-H2-RE	4015	1.34169	0.224858
FBgn0003423	slgA	FBtr0307528	slgA-RM	2551	1.34031	0.426048
FBgn0031652	jet	FBtr0079057	jet-RA	1453	1.33771	0.18537
FBgn0039881	CG1971	FBtr0085848	CG1971-RB	1106	1.33726	0.246243
FBgn0034729	CG10344	FBtr0071840	CG10344-RA	1132	1.33482	0.174106
FBgn0037440	CRAT	FBtr0344293	CRAT-RD	2267	1.33299	0.355029
FBgn0004956	upd1	FBtr0112847	upd1-RB	2443	1.33258	0.382835
FBgn0016685	Nlp	FBtr0085552	Nlp-RA	1080	1.33231	0.233605
FBgn0037716	CG8273	FBtr0082072	CG8273-RA	3125	1.33155	0.179692
FBgn0027574	CG5815	FBtr0339262	CG5815-RC	2296	1.3315	0.626966
FBgn0033808	CG4627	FBtr0087738	CG4627-RA	988	1.33122	5.20562e-06
FBgn0038224	ATPsynE	FBtr0082931	ATPsynE-RA	543	1.33022	5.20562e-06
FBgn0035107	mri	FBtr0346614	mri-RE	1736	1.32927	0.309732
FBgn0014026	RpL7A	FBtr0070915	RpL7A-RA	1124	1.32888	0.145538
FBgn0250814	UQCR-C2	FBtr0075309	UQCR-C2-RA	1686	1.32607	0.65743
FBgn0031117	GstT3	FBtr0077310	GstT3-RA	875	1.32574	5.20562e-06
FBgn0052451	SPoCk	FBtr0302134	SPoCk-RE	4245	1.32543	0.426048
FBgn0262782	Mdh1	FBtr0080050	Mdh1-RA	1159	1.32385	5.20562e-06
FBgn0035956	Doc2	FBtr0076547	Doc2-RA	1945	1.32362	5.20562e-06
FBgn0034093	CG15706	FBtr0087191	CG15706-RA	2460	1.32333	0.585274
FBgn0040366	CG11398	FBtr0070250	CG11398-RA	1487	1.32324	5.20562e-06
FBgn0030685	Graf	FBtr0340306	Graf-RH	4104	1.32261	0.263159
FBgn0003612	Su(var)2-10	FBtr0088578	Su(var)2-10-RA	2063	1.32104	0.256896
FBgn0014002	Pdi	FBtr0346644	Pdi-RE	2328	1.32001	0.762127
FBgn0034368	zda	FBtr0340394	zda-RB	1642	1.31994	0.602278
FBgn0035065	CG3589	FBtr0072375	CG3589-RA	1772	1.31888	5.20562e-06
FBgn0033781	CG13319	FBtr0087788	CG13319-RA	691	1.31729	0.246243
FBgn0004878	cas	FBtr0078725	cas-RA	3151	1.31696	0.188944
FBgn0031769	CG9135	FBtr0346135	CG9135-RD	1871	1.31681	0.562225
FBgn0038389	CG5516	FBtr0302549	CG5516-RB	733	1.31494	0.263159
FBgn0000339	cni	FBtr0080849	cni-RB	878	1.3132	0.142102
FBgn0033232	CG12159	FBtr0088888	CG12159-RA	889	1.3118	5.20562e-06
FBgn0033615	CG7741	FBtr0339481	CG7741-RC	1703	1.31173	0.34252
FBgn0031377	CG15356	FBtr0077869	CG15356-RA	4294	1.31075	5.20562e-06
FBgn0026090	CG14812	FBtr0333511	CG14812-RB	802	1.31071	0.27502
FBgn0032078	C1GalTA	FBtr0079789	C1GalTA-RC	2019	1.30844	5.20562e-06
FBgn0028671	Vha100-1	FBtr0085376	Vha100-1-RF	2898	1.30796	0.619158
FBgn0027084	LysRS	FBtr0071367	LysRS-RB	2223	1.30635	0.538029
FBgn0034184	CG9646	FBtr0086974	CG9646-RA	3435	1.30603	5.20562e-06
FBgn0261836	Msp300	FBtr0332406	Msp300-RM	20943	1.30502	0.650595
FBgn0029935	CG4615	FBtr0071020	CG4615-RA	1973	1.30492	5.20562e-06
FBgn0031317	Charon	FBtr0077979	Charon-RA	1801	1.30489	5.20562e-06
FBgn0000808	gd	FBtr0332310	gd-RE	1932	1.30466	0.419084
FBgn0030743	CG9921	FBtr0333302	CG9921-RB	685	1.30301	5.20562e-06
FBgn0030968	CG7322	FBtr0346018	CG7322-RC	1183	1.30197	0.21376
FBgn0034876	wmd	FBtr0072114	wmd-RA	1606	1.30188	5.20562e-06
FBgn0032906	RPA2	FBtr0081438	RPA2-RA	963	1.30132	5.20562e-06
FBgn0028662	VhaPPA1-1	FBtr0083005	VhaPPA1-1-RA	1352	1.30105	5.20562e-06
FBgn0032731	Swip-1	FBtr0340322	Swip-1-RB	1860	1.30097	0.195081
FBgn0034743	RpS16	FBtr0343002	RpS16-RB	754	1.29859	0.296093
FBgn0053113	Rtnl1	FBtr0079041	Rtnl1-RD	1000	1.2963	0.126065
FBgn0037755	CG12945	FBtr0334685	CG12945-RC	2032	1.29575	0.181317
FBgn0039358	CG5028	FBtr0113290	CG5028-RC	1608	1.2929	0.291361
FBgn0264962	Pcf11	FBtr0345528	Pcf11-RH	6199	1.2906	0.411308
FBgn0039730	CG7903	FBtr0334707	CG7903-RB	1509	1.2891	0.323524
FBgn0031183	CG14621	FBtr0339557	CG14621-RB	2200	1.28878	5.20562e-06
FBgn0051279	CG31279	FBtr0337013	CG31279-RF	649	1.2886	0.145538
FBgn0023130	a6	FBtr0330407	a6-RB	2218	1.28801	0.8265
FBgn0267390	dop	FBtr0332091	dop-RB	7868	1.28701	0.602278
FBgn0015221	Fer2LCH	FBtr0332168	Fer2LCH-RD	1091	1.28652	5.20562e-06
FBgn0039942	CG17163	FBtr0113727	CG17163-RA	1716	1.28487	5.20562e-06
FBgn0052195	CG32195	FBtr0333696	CG32195-RB	1701	1.2829	0.145538
FBgn0030996	CG14194	FBtr0074671	CG14194-RA	1940	1.27992	5.20562e-06
FBgn0016754	sba	FBtr0308564	sba-RG	5523	1.27987	0.39016
FBgn0029161	slmo	FBtr0079218	slmo-RB	1162	1.27929	0.156184
FBgn0034946	CG3065	FBtr0072155	CG3065-RA	1929	1.27899	0.156184
FBgn0011290	Taf12	FBtr0082440	Taf12-RB	1066	1.27701	0.126065
FBgn0028411	Nxt1	FBtr0343270	Nxt1-RB	540	1.27668	0.176514
FBgn0030101	CG12118	FBtr0071339	CG12118-RA	1277	1.27557	0.27502
FBgn0033631	Sod3	FBtr0339489	Sod3-RE	1228	1.27527	5.20562e-06
FBgn0034187	CG6967	FBtr0300277	CG6967-RD	3474	1.27465	0.256896
FBgn0029176	eEF1gamma	FBtr0085393	eEF1gamma-RA	1662	1.27361	5.20562e-06
FBgn0040066	wds	FBtr0308566	wds-RB	1973	1.27337	0.126065
FBgn0020018	Ppox	FBtr0084664	Ppox-RA	1655	1.27336	5.20562e-06
FBgn0267376	SelR	FBtr0082291	SelR-RB	1041	1.27319	0.179692
FBgn0000581	E(Pc)	FBtr0088139	E(Pc)-RA	9408	1.27278	0.985701
FBgn0025558	CG4101	FBtr0075314	CG4101-RA	465	1.27264	5.20562e-06
FBgn0042094	Adk3	FBtr0082330	Adk3-RB	987	1.2724	0.316147
FBgn0036096	CG8003	FBtr0331572	CG8003-RB	1555	1.2723	0.142102
FBgn0086690	Plp	FBtr0333947	Plp-RP	9473	1.27217	0.585274
FBgn0038672	CG6005	FBtr0343992	CG6005-RB	1456	1.27185	0.355029
FBgn0026872	CG14777	FBtr0339577	CG14777-RE	855	1.27156	0.142102
FBgn0026737	CG6171	FBtr0083113	CG6171-RA	1001	1.2686	5.20562e-06
FBgn0000251	cad	FBtr0335152	cad-RC	2570	1.26731	0.240862
FBgn0033372	CG13742	FBtr0339285	CG13742-RE	2339	1.26725	0.2168
FBgn0286511	Pld	FBtr0336520	Pld-RG	4276	1.26628	0.27502
FBgn0026085	dgt4	FBtr0070642	dgt4-RA	729	1.26578	5.20562e-06
FBgn0063670	CG40228	FBtr0113841	CG40228-RC	1686	1.26508	5.20562e-06
FBgn0001330	kz	FBtr0070419	kz-RA	3927	1.26455	0.703402
FBgn0030099	CG12056	FBtr0071305	CG12056-RA	952	1.26418	5.20562e-06
FBgn0030090	fend	FBtr0071349	fend-RB	3566	1.26355	5.20562e-06
FBgn0011837	Tis11	FBtr0333756	Tis11-RC	5009	1.26315	5.20562e-06
FBgn0030291	CG1738	FBtr0073451	CG1738-RA	799	1.26303	5.20562e-06
FBgn0031418	CG3609	FBtr0303027	CG3609-RB	1099	1.26295	0.49271
FBgn0030208	PPP4R2r	FBtr0336899	PPP4R2r-RD	2473	1.2617	0.349361
FBgn0037552	CG7800	FBtr0081795	CG7800-RA	1778	1.26125	5.20562e-06
FBgn0261618	larp	FBtr0306390	larp-RH	7919	1.25997	0.562225
FBgn0027579	mino	FBtr0335011	mino-RE	3176	1.25993	0.285479
FBgn0261068	LSm7	FBtr0080934	LSm7-RA	705	1.2596	5.20562e-06
FBgn0037655	Kcmf1	FBtr0300747	Kcmf1-RH	2445	1.2557	0.296093
FBgn0036959	CG6951	FBtr0074828	CG6951-RB	1062	1.25568	0.170847
FBgn0038545	pasi1	FBtr0305007	pasi1-RB	874	1.25495	0.3968
FBgn0086655	jing	FBtr0332950	jing-RJ	7491	1.25449	5.20562e-06
FBgn0035850	Atg18a	FBtr0346547	Atg18a-RG	2235	1.25447	0.8265
FBgn0052095	CG32095	FBtr0076077	CG32095-RA	1526	1.25445	5.20562e-06
FBgn0034970	yki	FBtr0290256	yki-RD	1369	1.25443	0.158791
FBgn0013325	RpL11	FBtr0340533	RpL11-RB	1017	1.2533	0.170847
FBgn0015218	eIF4E1	FBtr0333884	eIF4E1-RH	1492	1.25212	0.419084
FBgn0004107	Cdk2	FBtr0083922	Cdk2-RB	1215	1.25127	0.179692
FBgn0039928	Cals	FBtr0089207	Cals-RA	3693	1.25011	0.188944
FBgn0285950	RpL19	FBtr0072405	RpL19-RA	1361	1.24989	0.126065
FBgn0036449	bmm	FBtr0075699	bmm-RA	2437	1.24965	5.20562e-06
FBgn0261674	CG42709	FBtr0302982	CG42709-RC	2053	1.24951	0.545053
FBgn0032465	CG12404	FBtr0080430	CG12404-RA	1207	1.24813	5.20562e-06
FBgn0000339	cni	FBtr0337082	cni-RC	1132	1.24605	0.2168
FBgn0051122	CG31122	FBtr0301432	CG31122-RB	2993	1.2452	5.20562e-06
FBgn0011653	mas	FBtr0073260	mas-RB	3657	1.24396	0.256896
FBgn0035890	CG13667	FBtr0076611	CG13667-RB	1846	1.24235	0.672985
FBgn0029524	CG3176	FBtr0070078	CG3176-RA	517	1.24192	0.195081
FBgn0263993	CG43736	FBtr0330263	CG43736-RA	4382	1.24183	0.156184
FBgn0034797	nahoda	FBtr0071943	nahoda-RB	5067	1.24149	0.20663
FBgn0034578	CG15653	FBtr0071545	CG15653-RA	711	1.23798	5.20562e-06
FBgn0053229	CG33229	FBtr0345592	CG33229-RB	1754	1.23746	0.13639
FBgn0042092	CG13773	FBtr0079372	CG13773-RA	1081	1.23373	5.20562e-06
FBgn0003721	Tm1	FBtr0089962	Tm1-RC	2651	1.23338	0.165641
FBgn0015625	CycB3	FBtr0334578	CycB3-RB	2883	1.23231	0.165641
FBgn0030400	Pits	FBtr0331718	Pits-RE	5718	1.23129	0.349361
FBgn0024187	syd	FBtr0332790	syd-RH	5074	1.22896	0.382835
FBgn0035321	CG1275	FBtr0072907	CG1275-RA	1574	1.22838	0.285479
FBgn0039633	CG11873	FBtr0085365	CG11873-RA	9937	1.22497	0.962172
FBgn0283536	Vha13	FBtr0346100	Vha13-RB	943	1.22198	0.176514
FBgn0036290	CG10638	FBtr0089322	CG10638-RB	1180	1.22153	0.156184
FBgn0014869	Pglym78	FBtr0085384	Pglym78-RA	1136	1.22121	0.18537
FBgn0037686	RpL34b	FBtr0082049	RpL34b-RB	754	1.22025	5.20562e-06
FBgn0030608	Lsd-2	FBtr0073967	Lsd-2-RA	2148	1.22012	5.20562e-06
FBgn0016053	pgc	FBtr0342987	pgc-RD	643	1.2186	5.20562e-06
FBgn0035205	Ctr9	FBtr0072668	Ctr9-RB	3770	1.21847	0.634122
FBgn0010531	Ccs	FBtr0333068	Ccs-RC	959	1.21815	0.27502
FBgn0001320	kni	FBtr0344836	kni-RB	1911	1.21712	0.738593
FBgn0025741	PlexA	FBtr0089224	PlexA-RC	5200	1.21684	0.516353
FBgn0262617	CG43143	FBtr0305351	CG43143-RD	5997	1.2168	0.303186
FBgn0015222	Fer1HCH	FBtr0085634	Fer1HCH-RD	1187	1.216	0.126065
FBgn0265998	Doa	FBtr0299742	Doa-RJ	3028	1.21546	0.296093
FBgn0032236	mRpS7	FBtr0332194	mRpS7-RB	917	1.21314	0.195081
FBgn0037368	CG1239	FBtr0343989	CG1239-RC	1052	1.21146	0.34252
FBgn0003654	sw	FBtr0089398	sw-RB	2841	1.20901	0.65743
FBgn0040020	MED21	FBtr0113739	MED21-RB	863	1.20843	5.20562e-06
FBgn0039790	CG2246	FBtr0085675	CG2246-RB	1616	1.20589	0.269895
FBgn0044324	Chro	FBtr0346095	Chro-RE	4056	1.20339	0.703402
FBgn0013799	Deaf1	FBtr0332153	Deaf1-RD	3588	1.20073	0.174106
FBgn0050109	CG30109	FBtr0340271	CG30109-RB	609	1.20062	5.20562e-06
FBgn0263050	CG43345	FBtr0306974	CG43345-RB	2250	1.20059	5.20562e-06
FBgn0029093	cathD	FBtr0088898	cathD-RA	1396	1.20014	5.20562e-06
FBgn0001224	Hsp23	FBtr0076453	Hsp23-RA	849	1.19901	0.819738
FBgn0040340	TRAM	FBtr0332589	TRAM-RE	1656	1.19758	0.426048
FBgn0004646	ogre	FBtr0309873	ogre-RC	2158	1.19565	0.2168
FBgn0067864	Patj	FBtr0072781	Patj-RB	3236	1.19463	0.3968
FBgn0038145	Droj2	FBtr0082755	Droj2-RE	1824	1.19258	0.3968
FBgn0040395	Unc-76	FBtr0070377	Unc-76-RA	2860	1.19209	0.611625
FBgn0033777	CG17574	FBtr0087816	CG17574-RA	1162	1.19158	5.20562e-06
FBgn0038833	CG15696	FBtr0083968	CG15696-RA	681	1.19082	0.156184
FBgn0032078	C1GalTA	FBtr0079788	C1GalTA-RB	2227	1.19067	0.126065
FBgn0030693	CG8974	FBtr0074188	CG8974-RD	1280	1.19061	5.20562e-06
FBgn0000581	E(Pc)	FBtr0330622	E(Pc)-RD	9554	1.19007	0.49271
FBgn0052230	ND-MLRQ	FBtr0070040	ND-MLRQ-RA	439	1.18963	0.650595
FBgn0027615	CG6404	FBtr0076272	CG6404-RA	1605	1.18947	5.20562e-06
FBgn0033669	PI31	FBtr0088052	PI31-RC	1136	1.18844	0.712714
FBgn0000808	gd	FBtr0332309	gd-RD	1923	1.18841	0.483314
FBgn0032871	CG2611	FBtr0081387	CG2611-RA	634	1.1861	5.20562e-06
FBgn0024194	rasp	FBtr0073029	rasp-RA	1673	1.18555	5.20562e-06
FBgn0052675	Tango5	FBtr0071499	Tango5-RB	1890	1.18531	0.980736
FBgn0035951	CG5068	FBtr0076519	CG5068-RA	1592	1.18245	0.545053
FBgn0010341	Cdc42	FBtr0074751	Cdc42-RA	1392	1.18222	0.149336
FBgn0034918	Pym	FBtr0072233	Pym-RA	983	1.18179	5.20562e-06
FBgn0037026	CG3634	FBtr0078272	CG3634-RA	2315	1.18091	0.2168
FBgn0028397	Tob	FBtr0310446	Tob-RF	4596	1.18045	0.145538
FBgn0036039	Naa60	FBtr0089410	Naa60-RB	2231	1.17958	0.18537
FBgn0263108	BtbVII	FBtr0307305	BtbVII-RE	4016	1.17932	0.611625
FBgn0039044	p53	FBtr0084359	p53-RA	1577	1.17908	5.20562e-06
FBgn0030878	CG6769	FBtr0334034	CG6769-RB	1543	1.17563	0.885055
FBgn0038524	sll	FBtr0305308	sll-RB	1994	1.17473	0.49271
FBgn0024807	DIP1	FBtr0077371	DIP1-RB	3553	1.17465	0.291361
FBgn0261238	Alh	FBtr0081612	Alh-RA	5006	1.17463	0.179692
FBgn0263993	CG43736	FBtr0345898	CG43736-RL	7668	1.17436	0.483314
FBgn0036318	Wbp2	FBtr0273241	Wbp2-RC	1751	1.1739	0.852888
FBgn0031977	baf	FBtr0079535	baf-RA	607	1.17358	5.20562e-06
FBgn0002962	nos	FBtr0083732	nos-RA	2349	1.17343	5.20562e-06
FBgn0053200	VepD	FBtr0071826	VepD-RA	491	1.173	0.812666
FBgn0262782	Mdh1	FBtr0345435	Mdh1-RB	1289	1.17242	5.20562e-06
FBgn0031229	CG3436	FBtr0340650	CG3436-RC	1381	1.17221	0.819738
FBgn0036451	CG9425	FBtr0075693	CG9425-RB	8497	1.17204	0.126065
FBgn0053113	Rtnl1	FBtr0079042	Rtnl1-RA	1428	1.17148	0.240862
FBgn0034059	CG8320	FBtr0087202	CG8320-RA	981	1.17143	5.20562e-06
FBgn0013750	Arf51F	FBtr0087377	Arf51F-RC	1370	1.17078	0.126065
FBgn0033258	CG8712	FBtr0088822	CG8712-RA	1489	1.16987	0.170847
FBgn0030724	Nipsnap	FBtr0074258	Nipsnap-RA	1402	1.16973	0.170847
FBgn0024362	Naa30A	FBtr0310619	Naa30A-RD	1989	1.16564	0.280079
FBgn0029594	CG14806	FBtr0070313	CG14806-RA	1019	1.16546	0.330013
FBgn0026089	CG14817	FBtr0345510	CG14817-RB	920	1.16426	0.224858
FBgn0050089	CG30089	FBtr0087285	CG30089-RA	4696	1.16351	0.355029
FBgn0032801	CG10165	FBtr0081277	CG10165-RA	1116	1.16301	0.263159
FBgn0039132	AP-1sigma	FBtr0305039	AP-1sigma-RB	1181	1.16281	0.303186
FBgn0039065	Rad60	FBtr0334499	Rad60-RC	1494	1.1616	0.545053
FBgn0027561	CG18659	FBtr0088626	CG18659-RA	3519	1.15731	0.303186
FBgn0000017	Abl	FBtr0345369	Abl-RJ	12510	1.15709	0.562225
FBgn0000097	aop	FBtr0077851	aop-RA	4266	1.15708	0.411308
FBgn0039300	RpS27	FBtr0084868	RpS27-RA	729	1.15669	0.952894
FBgn0029801	CG15771	FBtr0345789	CG15771-RD	2464	1.15505	0.256896
FBgn0038429	CG14882	FBtr0083289	CG14882-RA	1511	1.15467	0.594466
FBgn0263005	CG43313	FBtr0346130	CG43313-RB	4326	1.15439	5.20562e-06
FBgn0035232	CG12099	FBtr0072829	CG12099-RA	2827	1.15427	0.923553
FBgn0038903	RpI12	FBtr0084166	RpI12-RA	530	1.1542	5.20562e-06
FBgn0031059	CG14229	FBtr0335023	CG14229-RB	1018	1.15376	0.349361
FBgn0035238	CG12104	FBtr0072825	CG12104-RA	1182	1.15347	0.316147
FBgn0051898	CG31898	FBtr0079662	CG31898-RA	1172	1.15288	0.13639
FBgn0053113	Rtnl1	FBtr0301539	Rtnl1-RI	1495	1.15242	0.296093
FBgn0026250	eIF1A	FBtr0083573	eIF1A-RB	1199	1.1504	0.368863
FBgn0029785	RpL35	FBtr0345788	RpL35-RC	590	1.14884	0.263159
FBgn0003862	trx	FBtr0082950	trx-RD	13603	1.14747	0.355029
FBgn0039461	CG5500	FBtr0085064	CG5500-RA	859	1.14712	5.20562e-06
FBgn0030480	Tim9a	FBtr0073775	Tim9a-RA	516	1.14706	0.594466
FBgn0039406	RpL34a	FBtr0084973	RpL34a-RB	621	1.14605	0.263159
FBgn0030673	CG15601	FBtr0339685	CG15601-RD	1060	1.14572	0.316147
FBgn0003741	tra	FBtr0075364	tra-RA	687	1.14528	0.8265
FBgn0038043	CG17202	FBtr0082587	CG17202-RA	777	1.14458	5.20562e-06
FBgn0036896	wnd	FBtr0074964	wnd-RB	4307	1.1443	0.3968
FBgn0024983	CG4293	FBtr0070089	CG4293-RA	1689	1.14363	0.411308
FBgn0031039	Shawn	FBtr0074739	Shawn-RD	1618	1.14359	5.20562e-06
FBgn0033631	Sod3	FBtr0433531	Sod3-RF	1772	1.14286	0.149336
FBgn0285950	RpL19	FBtr0072406	RpL19-RB	755	1.14269	5.20562e-06
FBgn0035268	CG8001	FBtr0334073	CG8001-RC	2540	1.14244	0.602278
FBgn0000071	Ama	FBtr0081620	Ama-RC	1526	1.14198	0.188944
FBgn0052850	CG32850	FBtr0089123	CG32850-RA	2311	1.14141	5.20562e-06
FBgn0262714	Sap130	FBtr0114506	Sap130-RE	4060	1.14039	0.980736
FBgn0038243	CG8066	FBtr0334959	CG8066-RB	703	1.14028	0.142102
FBgn0000166	bcd	FBtr0081668	bcd-RG	2514	1.13907	0.585274
FBgn0033086	CG9410	FBtr0330253	CG9410-RE	833	1.13876	0.355029
FBgn0030608	Lsd-2	FBtr0340427	Lsd-2-RD	2279	1.13857	0.192125
FBgn0000071	Ama	FBtr0081618	Ama-RB	1833	1.13719	0.316147
FBgn0040237	bor	FBtr0305998	bor-RB	2404	1.13647	0.778551
FBgn0263697	Uba3	FBtr0087585	Uba3-RA	1481	1.13614	5.20562e-06
FBgn0051908	CG31908	FBtr0079430	CG31908-RB	1821	1.13612	0.753969
FBgn0283467	Pol32	FBtr0303164	Pol32-RB	1486	1.1354	0.152707
FBgn0030522	CG11103	FBtr0100218	CG11103-RB	923	1.13307	5.20562e-06
FBgn0031195	CG17600	FBtr0077359	CG17600-RB	1069	1.13281	0.285479
FBgn0030653	CG7860	FBtr0074045	CG7860-RA	1377	1.12957	0.263159
FBgn0283509	Phm	FBtr0072203	Phm-RA	1603	1.12895	0.145538
FBgn0039528	dsd	FBtr0335247	dsd-RC	5800	1.12654	0.368863
FBgn0036927	Gabat	FBtr0302049	Gabat-RC	2251	1.12637	0.524191
FBgn0263772	CG43689	FBtr0310492	CG43689-RD	4680	1.12633	0.382835
FBgn0000166	bcd	FBtr0081665	bcd-RD	2499	1.12619	5.20562e-06
FBgn0036897	CG8786	FBtr0290116	CG8786-RC	1667	1.12567	0.27502
FBgn0017418	ari-1	FBtr0089508	ari-1-RC	2811	1.12292	0.672985
FBgn0036684	CG3764	FBtr0332122	CG3764-RC	5092	1.12257	0.731002
FBgn0031047	Rcd-1	FBtr0074744	Rcd-1-RA	1612	1.12195	0.209592
FBgn0033994	CG7544	FBtr0300324	CG7544-RB	1592	1.12133	0.152707
FBgn0010548	Aldh-III	FBtr0300478	Aldh-III-RL	2144	1.12021	0.602278
FBgn0020620	RN-tre	FBtr0087603	RN-tre-RC	2715	1.11916	5.20562e-06
FBgn0000259	CkIIbeta	FBtr0073561	CkIIbeta-RD	966	1.11912	0.126065
FBgn0034181	CG8963	FBtr0087017	CG8963-RB	2753	1.11825	0.626966
FBgn0030151	CG1354	FBtr0089385	CG1354-RD	1684	1.11801	0.240862
FBgn0036728	UQCR-Q	FBtr0302509	UQCR-Q-RB	746	1.11684	0.411308
FBgn0087012	5-HT2A	FBtr0339395	5-HT2A-RF	3541	1.11624	0.269895
FBgn0036887	CG9231	FBtr0344994	CG9231-RB	847	1.11616	0.626966
FBgn0011290	Taf12	FBtr0335213	Taf12-RE	897	1.11573	5.20562e-06
FBgn0262975	cnc	FBtr0306750	cnc-RG	3921	1.11508	5.20562e-06
FBgn0033015	d4	FBtr0111115	d4-RB	1850	1.11505	0.330013
FBgn0030703	MSBP	FBtr0074166	MSBP-RA	1487	1.11426	5.20562e-06
FBgn0264953	Piezo	FBtr0335178	Piezo-RH	9297	1.1141	0.2168
FBgn0031995	CG8475	FBtr0335186	CG8475-RC	3731	1.11405	0.3968
FBgn0050381	PIG-X	FBtr0113374	PIG-X-RB	1177	1.11393	5.20562e-06
FBgn0015776	nrv1	FBtr0079384	nrv1-RA	2195	1.11341	0.195081
FBgn0031195	CG17600	FBtr0333714	CG17600-RD	2398	1.11291	0.411308
FBgn0016053	pgc	FBtr0112520	pgc-RA	1211	1.11218	0.13639
FBgn0040324	Ephrin	FBtr0089076	Ephrin-RB	3025	1.11138	0.156184
FBgn0016701	Rab4	FBtr0086830	Rab4-RA	1316	1.1101	5.20562e-06
FBgn0030710	CG8924	FBtr0074130	CG8924-RB	2575	1.11006	5.20562e-06
FBgn0036107	galla-2	FBtr0076270	galla-2-RA	629	1.10952	5.20562e-06
FBgn0011290	Taf12	FBtr0082442	Taf12-RA	1234	1.10928	0.179692
FBgn0032750	CG10495	FBtr0081150	CG10495-RA	1371	1.10693	5.20562e-06
FBgn0037261	CG9775	FBtr0078894	CG9775-RA	1930	1.1066	5.20562e-06
FBgn0031871	Fgop2	FBtr0332325	Fgop2-RB	2048	1.10639	0.285479
FBgn0029914	CG4558	FBtr0300177	CG4558-RB	1868	1.10638	5.20562e-06
FBgn0029840	raptor	FBtr0345895	raptor-RC	7097	1.1054	0.747887
FBgn0044324	Chro	FBtr0078570	Chro-RA	3871	1.10495	0.672985
FBgn0036762	CG7430	FBtr0075140	CG7430-RA	2252	1.10461	0.2168
FBgn0035235	CG7879	FBtr0072827	CG7879-RB	3691	1.10435	5.20562e-06
FBgn0052069	CG32069	FBtr0076241	CG32069-RA	356	1.10362	0.126065
FBgn0037328	RpL35A	FBtr0078769	RpL35A-RA	621	1.10294	5.20562e-06
FBgn0016694	Pdp1	FBtr0076775	Pdp1-RF	2828	1.10262	5.20562e-06
FBgn0051550	CG31550	FBtr0113409	CG31550-RC	2573	1.10229	0.585274
FBgn0032105	borr	FBtr0079817	borr-RA	1286	1.10223	0.39016
FBgn0261383	IntS6	FBtr0070841	IntS6-RA	5733	1.10033	0.602278
FBgn0283510	Pal1	FBtr0339422	Pal1-RC	1950	1.09879	5.20562e-06
FBgn0086757	cbs	FBtr0309887	cbs-RC	2227	1.09821	0.602278
FBgn0001180	hb	FBtr0081951	hb-RA	3338	1.09777	0.13639
FBgn0014455	Ahcy	FBtr0346181	Ahcy-RC	2119	1.09687	5.20562e-06
FBgn0062413	Ctr1A	FBtr0070951	Ctr1A-RA	2103	1.09423	0.240862
FBgn0038421	CG17931	FBtr0083323	CG17931-RA	762	1.09383	5.20562e-06
FBgn0003969	vap	FBtr0074140	vap-RB	3426	1.09352	0.785835
FBgn0030640	CG6294	FBtr0308830	CG6294-RB	2306	1.09339	0.3968
FBgn0005654	Orc3	FBtr0087768	Orc3-RA	3315	1.09286	0.336441
FBgn0263602	Tasp1	FBtr0333600	Tasp1-RB	2159	1.09131	5.20562e-06
FBgn0005649	Rox8	FBtr0084592	Rox8-RB	3218	1.09104	0.376268
FBgn0030679	CG8206	FBtr0346187	CG8206-RB	1188	1.09026	0.349361
FBgn0086370	sra	FBtr0083255	sra-RA	1855	1.0894	5.20562e-06
FBgn0284222	CG46306	FBtr0452121	CG46306-RA	2234	1.0893	5.20562e-06
FBgn0264751	Vti1b	FBtr0334144	Vti1b-RA	571	1.08913	5.20562e-06
FBgn0285925	Fas1	FBtr0083332	Fas1-RA	3002	1.08833	5.20562e-06
FBgn0243516	Vrp1	FBtr0071792	Vrp1-RF	3407	1.08741	0.142102
FBgn0086605	CG9853	FBtr0113192	CG9853-RB	1818	1.08741	0.336441
FBgn0032223	GATAd	FBtr0333098	GATAd-RC	3467	1.08682	0.18537
FBgn0033062	Ars2	FBtr0086018	Ars2-RA	3419	1.08679	0.355029
FBgn0035346	CG1146	FBtr0072921	CG1146-RB	1840	1.08625	0.362239
FBgn0003326	sca	FBtr0087856	sca-RB	3796	1.08613	0.2168
FBgn0031157	CG1503	FBtr0344414	CG1503-RB	1405	1.08582	0.805973
FBgn0031066	COX6B	FBtr0074817	COX6B-RB	554	1.08503	0.220584
FBgn0032698	CG10336	FBtr0273194	CG10336-RC	1313	1.08421	0.721419
FBgn0032251	Nse4	FBtr0273339	Nse4-RB	1383	1.08229	0.149336
FBgn0032420	CG6583	FBtr0080358	CG6583-RA	1071	1.08224	5.20562e-06
FBgn0263121	Prosalpha1	FBtr0088895	Prosalpha1-RB	969	1.08213	0.296093
FBgn0026192	par-6	FBtr0074455	par-6-RA	3032	1.08139	0.449308
FBgn0002962	nos	FBtr0335019	nos-RB	2292	1.08081	5.20562e-06
FBgn0037646	CAHbeta	FBtr0081958	CAHbeta-RA	1078	1.08079	5.20562e-06
FBgn0003023	otu	FBtr0333146	otu-RD	3006	1.08042	0.233605
FBgn0014010	Rab5	FBtr0077796	Rab5-RC	2491	1.07991	0.889779
FBgn0039969	Fis1	FBtr0273211	Fis1-RF	704	1.07979	5.20562e-06
FBgn0032935	Atg18b	FBtr0331678	Atg18b-RB	2435	1.07948	0.509645
FBgn0259923	04-Sep	FBtr0074368	Sep4-RD	2919	1.0794	0.34252
FBgn0030645	Alg14	FBtr0074036	Alg14-RA	696	1.07902	0.126065
FBgn0030178	Naxe	FBtr0290234	Naxe-RB	1200	1.07846	5.20562e-06
FBgn0264357	SNF4Agamma	FBtr0110939	SNF4Agamma-RK	3128	1.07834	0.889779
FBgn0265042	Irk1	FBtr0336475	Irk1-RD	2202	1.07825	0.819738
FBgn0037613	Cks85A	FBtr0081949	Cks85A-RA	610	1.07822	0.152707
FBgn0036144	GlcAT-P	FBtr0306254	GlcAT-P-RD	3654	1.07809	0.181317
FBgn0015773	NetA	FBtr0073942	NetA-RA	3245	1.0777	0.554553
FBgn0262738	norpA	FBtr0070650	norpA-RB	7112	1.07635	0.585274
FBgn0037094	CG7611	FBtr0078359	CG7611-RE	2972	1.07596	0.602278
FBgn0030703	MSBP	FBtr0333719	MSBP-RC	1503	1.07512	0.13639
FBgn0041182	Tep2	FBtr0079510	Tep2-RA	4539	1.07487	0.703402
FBgn0020235	ATPsyngamma	FBtr0085540	ATPsyngamma-RB	1395	1.07257	0.330013
FBgn0031600	CG3652	FBtr0077460	CG3652-RA	867	1.07238	5.20562e-06
FBgn0031696	Bub1	FBtr0342934	Bub1-RB	4091	1.07201	0.156184
FBgn0032429	CG5446	FBtr0080388	CG5446-RA	729	1.0719	0.126065
FBgn0029161	slmo	FBtr0343130	slmo-RE	1419	1.07169	0.291361
FBgn0035028	Start1	FBtr0089868	Start1-RA	2170	1.07137	0.368863
FBgn0028380	fal	FBtr0347258	fal-RD	2128	1.07117	0.49271
FBgn0037094	CG7611	FBtr0078365	CG7611-RD	3143	1.07033	0.885055
FBgn0033683	CG18343	FBtr0087982	CG18343-RA	449	1.06902	0.2168
FBgn0032943	Tsp39D	FBtr0273404	Tsp39D-RB	2359	1.06755	5.20562e-06
FBgn0010280	Taf4	FBtr0075448	Taf4-RA	4916	1.06621	0.240862
FBgn0032863	Cdc23	FBtr0081362	Cdc23-RA	2270	1.06509	0.252294
FBgn0035702	CG10147	FBtr0076987	CG10147-RA	1768	1.06497	0.619158
FBgn0026573	ADD1	FBtr0088041	ADD1-RB	3804	1.06485	0.449308
FBgn0027359	Tim8	FBtr0073482	Tim8-RA	661	1.06447	5.20562e-06
FBgn0264270	Sxl	FBtr0336727	Sxl-RZ	3317	1.06432	0.889779
FBgn0000566	Eip55E	FBtr0086710	Eip55E-RA	1362	1.06431	0.465757
FBgn0260941	app	FBtr0301057	app-RM	4537	1.06396	0.475788
FBgn0261573	CoRest	FBtr0307903	CoRest-RJ	2203	1.06314	0.403819
FBgn0038739	CG4686	FBtr0334307	CG4686-RB	933	1.06293	5.20562e-06
FBgn0260798	Gprk1	FBtr0302242	Gprk1-RB	2292	1.06075	0.650595
FBgn0260392	CG42518	FBtr0300662	CG42518-RA	871	1.06064	5.20562e-06
FBgn0033257	sand	FBtr0088780	sand-RA	1978	1.05964	5.20562e-06
FBgn0050010	CG30010	FBtr0088374	CG30010-RA	758	1.05928	0.650595
FBgn0036622	Agpat4	FBtr0331172	Agpat4-RC	1575	1.05913	0.666513
FBgn0031381	Npc2a	FBtr0077816	Npc2a-RA	651	1.05858	5.20562e-06
FBgn0032261	CG6094	FBtr0080091	CG6094-RA	735	1.05594	0.97196
FBgn0001987	Gli	FBtr0080765	Gli-RA	4095	1.05578	0.355029
FBgn0029092	ced-6	FBtr0088550	ced-6-RA	2382	1.05522	0.209592
FBgn0030734	CG9911	FBtr0074243	CG9911-RA	1503	1.05443	5.20562e-06
FBgn0039098	GILT3	FBtr0084434	GILT3-RA	773	1.05418	5.20562e-06
FBgn0085405	CG34376	FBtr0112608	CG34376-RA	2550	1.05352	0.181317
FBgn0000286	Cf2	FBtr0089648	Cf2-RB	3679	1.05289	0.4397
FBgn0015393	hoip	FBtr0079846	hoip-RA	569	1.05263	5.20562e-06
FBgn0000100	RpLP0	FBtr0334113	RpLP0-RB	1328	1.05244	0.762127
FBgn0053129	CG33129	FBtr0080169	CG33129-RE	2652	1.05068	0.179692
FBgn0000259	CkIIbeta	FBtr0073558	CkIIbeta-RB	3121	1.05022	5.20562e-06
FBgn0013750	Arf51F	FBtr0087379	Arf51F-RE	1357	1.04977	5.20562e-06
FBgn0036144	GlcAT-P	FBtr0076190	GlcAT-P-RB	3427	1.0497	5.20562e-06
FBgn0039741	CG7943	FBtr0085560	CG7943-RA	1644	1.04947	5.20562e-06
FBgn0034965	ppk29	FBtr0289967	ppk29-RD	1695	1.04881	0.509645
FBgn0041706	CG3253	FBtr0072251	CG3253-RA	1533	1.04842	0.233605
FBgn0014930	CG2846	FBtr0081763	CG2846-RA	1210	1.04807	0.2168
FBgn0010638	Sec61beta	FBtr0087498	Sec61beta-RA	792	1.04769	5.20562e-06
FBgn0034066	CG8397	FBtr0087261	CG8397-RA	921	1.04734	5.20562e-06
FBgn0024230	Hs2st	FBtr0081288	Hs2st-RA	1652	1.04726	5.20562e-06
FBgn0052062	Rbfox1	FBtr0332985	Rbfox1-RM	5584	1.04565	0.642079
FBgn0031060	CG14231	FBtr0074814	CG14231-RA	1628	1.04526	0.240862
FBgn0030066	CG1885	FBtr0071268	CG1885-RA	1229	1.04459	0.18537
FBgn0036134	FoxK	FBtr0300785	FoxK-RI	3159	1.0444	0.785835
FBgn0263396	sqd	FBtr0309094	sqd-RE	2844	1.04321	0.145538
FBgn0024320	Npc1a	FBtr0343610	Npc1a-RG	5025	1.04306	0.49271
FBgn0030968	CG7322	FBtr0074654	CG7322-RA	934	1.04251	0.39016
FBgn0035980	mRRF1	FBtr0076444	mRRF1-RA	891	1.04204	5.20562e-06
FBgn0035266	Gk2	FBtr0345817	Gk2-RF	2483	1.04202	0.4397
FBgn0030478	CG1640	FBtr0073770	CG1640-RC	2558	1.04155	0.229236
FBgn0033086	CG9410	FBtr0086115	CG9410-RA	891	1.0396	0.174106
FBgn0031473	CG3104	FBtr0077686	CG3104-RA	2213	1.03886	0.483314
FBgn0002590	RpS5a	FBtr0074406	RpS5a-RA	864	1.03737	0.65743
FBgn0040089	meso18E	FBtr0339435	meso18E-RC	2588	1.03728	0.602278
FBgn0010438	mtSSB	FBtr0083277	mtSSB-RA	575	1.03635	5.20562e-06
FBgn0061515	endos	FBtr0333053	endos-RF	1165	1.03635	0.21376
FBgn0011761	dhd	FBtr0345745	dhd-RB	952	1.03609	0.330013
FBgn0083985	CG34149	FBtr0113489	CG34149-RB	1032	1.03604	0.145538
FBgn0033177	CG11141	FBtr0345799	CG11141-RC	3243	1.03532	0.280079
FBgn0035793	CG7546	FBtr0076792	CG7546-RB	4742	1.03463	0.483314
FBgn0001276	ix	FBtr0088154	ix-RA	727	1.03447	5.20562e-06
FBgn0261556	CG42674	FBtr0332698	CG42674-RF	6949	1.03419	0.4397
FBgn0035047	Pof	FBtr0072328	Pof-RA	1736	1.03407	0.158791
FBgn0031435	Elba2	FBtr0077693	Elba2-RA	1493	1.03336	5.20562e-06
FBgn0041585	olf186-F	FBtr0086797	olf186-F-RA	2080	1.03146	5.20562e-06
FBgn0262169	magu	FBtr0088402	magu-RB	2838	1.03105	5.20562e-06
FBgn0000114	bru1	FBtr0331998	bru1-RK	3510	1.03057	0.86713
FBgn0029821	CG4020	FBtr0070824	CG4020-RA	1750	1.0304	0.570134
FBgn0053156	CG33156	FBtr0087682	CG33156-RA	1874	1.03037	0.4397
FBgn0004436	Ubc6	FBtr0306106	Ubc6-RC	1142	1.03037	5.20562e-06
FBgn0036337	AdenoK	FBtr0075896	AdenoK-RB	1387	1.03031	0.330013
FBgn0035046	ND-19	FBtr0072325	ND-19-RB	668	1.0301	0.403819
FBgn0050051	Tmem18	FBtr0114521	Tmem18-RC	676	1.02982	0.126065
FBgn0037777	CG11722	FBtr0082205	CG11722-RA	770	1.02962	5.20562e-06
FBgn0054015	CG34015	FBtr0100070	CG34015-RA	594	1.02798	5.20562e-06
FBgn0033846	mip120	FBtr0087669	mip120-RA	3475	1.02747	5.20562e-06
FBgn0034971	Gpat4	FBtr0302165	Gpat4-RC	1751	1.02744	0.174106
FBgn0033781	CG13319	FBtr0300890	CG13319-RB	687	1.02664	0.152707
FBgn0051864	Qtzl	FBtr0339524	Qtzl-RC	926	1.02657	0.18537
FBgn0030641	CG6299	FBtr0343983	CG6299-RC	987	1.02563	0.355029
FBgn0025700	CG5885	FBtr0079900	CG5885-RA	890	1.02509	5.20562e-06
FBgn0040660	CG13551	FBtr0072034	CG13551-RB	637	1.02487	0.165641
FBgn0030744	CG9992	FBtr0074306	CG9992-RB	1406	1.02325	0.585274
FBgn0031741	CG11034	FBtr0342609	CG11034-RC	2545	1.02273	0.280079
FBgn0036998	CG5969	FBtr0078198	CG5969-RA	947	1.02261	5.20562e-06
FBgn0039355	CG4730	FBtr0331364	CG4730-RC	1502	1.02177	0.785835
FBgn0036331	CG14117	FBtr0306091	CG14117-RD	1049	1.02155	5.20562e-06
FBgn0001180	hb	FBtr0081950	hb-RB	3181	1.02144	5.20562e-06
FBgn0029870	Marf	FBtr0070909	Marf-RB	3444	1.02121	0.832863
FBgn0262733	Src64B	FBtr0100505	Src64B-RD	2815	1.02085	0.731002
FBgn0261373	CG33228	FBtr0343490	CG33228-RC	737	1.02062	5.20562e-06
FBgn0038662	Mpc1	FBtr0334525	Mpc1-RC	1155	1.02038	0.188944
FBgn0010607	l(2)05714	FBtr0079051	l(2)05714-RB	1082	1.02032	0.224858
FBgn0284249	Adf1	FBtr0086113	Adf1-RC	1675	1.02013	5.20562e-06
FBgn0010551	Phb2	FBtr0086614	Phb2-RC	1495	1.01946	0.483314
FBgn0051126	CG31126	FBtr0084663	CG31126-RA	589	1.01873	5.20562e-06
FBgn0263278	Fic	FBtr0079257	Fic-RA	1918	1.01872	5.20562e-06
FBgn0031001	CG7884	FBtr0074674	CG7884-RA	3960	1.01836	0.554553
FBgn0023530	CG3740	FBtr0070283	CG3740-RA	829	1.01777	5.20562e-06
FBgn0261837	pre-mod(mdg4)-T	FBtr0346907	pre-mod(mdg4)-T-RB	1824	1.01776	0.252294
FBgn0030055	CG12772	FBtr0071221	CG12772-RA	3068	1.01738	0.721419
FBgn0259978	vlc	FBtr0086041	vlc-RC	2454	1.01597	0.376268
FBgn0083167	Neb-cGP	FBtr0071449	Neb-cGP-RA	410	1.01547	5.20562e-06
FBgn0265003	koi	FBtr0335512	koi-RA	4276	1.01441	5.20562e-06
FBgn0029152	Mkrn1	FBtr0078384	Mkrn1-RB	2163	1.01413	0.209592
FBgn0267376	SelR	FBtr0082292	SelR-RA	1008	1.01405	5.20562e-06
FBgn0038763	PIG-L	FBtr0344139	PIG-L-RD	2271	1.01396	0.126065
FBgn0032849	mRpS18B	FBtr0081339	mRpS18B-RB	761	1.0136	5.20562e-06
FBgn0025469	slv	FBtr0088824	slv-RA	1091	1.01335	5.20562e-06
FBgn0039003	wfs1	FBtr0302856	wfs1-RC	2668	1.01127	0.192125
FBgn0015221	Fer2LCH	FBtr0085622	Fer2LCH-RA	1284	1.01097	0.49271
FBgn0032783	CG10237	FBtr0081208	CG10237-RB	1457	1.01085	5.20562e-06
FBgn0029756	CG3309	FBtr0344827	CG3309-RB	2611	1.0103	0.545053
FBgn0035944	CG5021	FBtr0076514	CG5021-RB	1007	1.01029	0.280079
FBgn0031059	CG14229	FBtr0074753	CG14229-RA	797	1.00784	5.20562e-06
FBgn0028360	Cdc7	FBtr0070950	Cdc7-RA	3103	1.00741	5.20562e-06
FBgn0058191	CG40191	FBtr0113825	CG40191-RA	2923	1.00621	0.336441
FBgn0026060	Mipp2	FBtr0070884	Mipp2-RA	2458	1.00608	5.20562e-06
FBgn0264785	Hph	FBtr0334275	Hph-RA	2337	1.00589	0.126065
FBgn0036695	Papst2	FBtr0075279	Papst2-RA	1551	1.00562	5.20562e-06
FBgn0029588	CG14798	FBtr0089694	CG14798-RA	898	1.00556	0.240862
FBgn0037383	CG2023	FBtr0078666	CG2023-RA	2426	1.00548	0.158791
FBgn0020622	Pi3K21B	FBtr0331208	Pi3K21B-RE	4618	1.00515	5.20562e-06
FBgn0032949	Lamp1	FBtr0085896	Lamp1-RA	1583	1.00501	5.20562e-06
FBgn0053199	CG33199	FBtr0088688	CG33199-RA	1091	1.00404	5.20562e-06
FBgn0010741	Pfdn2	FBtr0332708	Pfdn2-RB	993	1.0036	0.49271
FBgn0261722	fwe	FBtr0075542	fwe-RA	1342	1.00332	5.20562e-06
FBgn0035888	CG7120	FBtr0332983	CG7120-RG	2686	1.00297	0.285479
FBgn0053111	CG33111	FBtr0334892	CG33111-RD	2191	1.00292	0.368863
FBgn0020279	lig	FBtr0301915	lig-RE	5048	1.00065	0.220584
FBgn0038738	CG4572	FBtr0083860	CG4572-RA	1793	0.999843	0.692916
FBgn0027259	Kmn1	FBtr0433505	Kmn1-RB	668	0.999814	0.152707
FBgn0052112	CG32112	FBtr0301047	CG32112-RD	1867	0.999716	0.252294
FBgn0250838	roh	FBtr0072030	roh-RA	604	0.999575	0.209592
FBgn0031895	CG4497	FBtr0302948	CG4497-RB	2741	0.99937	0.531116
FBgn0011787	mRpL12	FBtr0076511	mRpL12-RA	738	0.999286	5.20562e-06
FBgn0031284	PGAP2	FBtr0078039	PGAP2-RA	1370	0.999157	5.20562e-06
FBgn0266717	Bruce	FBtr0331684	Bruce-RE	15369	0.998215	0.980736
FBgn0032921	Mpp6	FBtr0081469	Mpp6-RA	1335	0.997429	5.20562e-06
FBgn0025335	Cpes	FBtr0072227	Cpes-RA	1734	0.99719	0.246243
FBgn0034117	CG7997	FBtr0087171	CG7997-RB	1680	0.996195	0.475788
FBgn0032120	CG33298	FBtr0089853	CG33298-RB	6463	0.99595	0.21376
FBgn0040918	schlank	FBtr0070937	schlank-RA	2201	0.995636	0.240862
FBgn0052594	be	FBtr0073957	be-RC	3240	0.995427	0.832863
FBgn0034025	Pgant1	FBtr0087332	Pgant1-RB	2677	0.995022	5.20562e-06
FBgn0031769	CG9135	FBtr0343121	CG9135-RC	2227	0.995	5.20562e-06
FBgn0037093	Cdk12	FBtr0078358	Cdk12-RA	4772	0.994849	0.179692
FBgn0264562	Hr4	FBtr0333343	Hr4-RI	8338	0.994762	0.362239
FBgn0028648	mRpL50	FBtr0076891	mRpL50-RA	739	0.994678	5.20562e-06
FBgn0000319	Chc	FBtr0074181	Chc-RC	5734	0.994413	0.349361
FBgn0015031	cype	FBtr0307035	cype-RC	460	0.994387	0.634122
FBgn0010531	Ccs	FBtr0300944	Ccs-RB	890	0.993428	0.181317
FBgn0034925	CG5339	FBtr0072220	CG5339-RA	1239	0.992071	5.20562e-06
FBgn0030671	CG8134	FBtr0074054	CG8134-RA	1421	0.991302	0.13639
FBgn0051866	Ada1-2	FBtr0080287	Ada1-2-RA	1089	0.99108	5.20562e-06
FBgn0030503	Tango2	FBtr0340395	Tango2-RD	1622	0.990699	0.538029
FBgn0266696	Svil	FBtr0345087	Svil-RL	7321	0.990435	0.39016
FBgn0000077	amx	FBtr0071331	amx-RA	1422	0.990283	0.419084
FBgn0030196	Psf3	FBtr0071465	Psf3-RA	1150	0.990194	5.20562e-06
FBgn0260463	Unc-115b	FBtr0082094	Unc-115b-RC	2514	0.989819	0.692916
FBgn0004394	pdm2	FBtr0080393	pdm2-RA	2171	0.988812	5.20562e-06
FBgn0011586	e(r)	FBtr0333605	e(r)-RE	1332	0.98818	0.465757
FBgn0010452	trn	FBtr0075890	trn-RA	3365	0.988104	5.20562e-06
FBgn0039665	CG2310	FBtr0085433	CG2310-RA	1083	0.987492	0.426048
FBgn0051450	mRpS18A	FBtr0081897	mRpS18A-RA	581	0.987344	5.20562e-06
FBgn0260463	Unc-115b	FBtr0082095	Unc-115b-RA	2976	0.986904	0.672985
FBgn0027088	GlyRS	FBtr0075633	GlyRS-RB	2545	0.986795	0.457087
FBgn0020622	Pi3K21B	FBtr0331205	Pi3K21B-RB	3319	0.986513	5.20562e-06
FBgn0043364	cbt	FBtr0078083	cbt-RA	2041	0.986314	5.20562e-06
FBgn0030973	CG7332	FBtr0342877	CG7332-RB	3401	0.984774	0.145538
FBgn0050147	Hil	FBtr0086256	Hil-RA	3320	0.9841	0.382835
FBgn0034703	CG3045	FBtr0071787	CG3045-RA	1663	0.983888	5.20562e-06
FBgn0011300	babo	FBtr0088658	babo-RB	4839	0.982615	0.49271
FBgn0016701	Rab4	FBtr0086829	Rab4-RB	973	0.982418	0.224858
FBgn0023519	mRpL16	FBtr0070314	mRpL16-RA	869	0.981856	0.149336
FBgn0011289	TfIIA-L	FBtr0085156	TfIIA-L-RB	1586	0.981518	0.545053
FBgn0038769	CG10889	FBtr0083839	CG10889-RA	2176	0.981005	5.20562e-06
FBgn0050491	CG30491	FBtr0088919	CG30491-RA	1414	0.980844	0.562225
FBgn0030973	CG7332	FBtr0074647	CG7332-RA	2146	0.980389	5.20562e-06
FBgn0051961	TBCC	FBtr0077484	TBCC-RA	1333	0.980031	5.20562e-06
FBgn0052579	CG32579	FBtr0074225	CG32579-RA	1296	0.980031	5.20562e-06
FBgn0020389	Papss	FBtr0074886	Papss-RC	2500	0.980027	0.516353
FBgn0032723	ssp3	FBtr0342929	ssp3-RB	6318	0.980024	0.712714
FBgn0033474	CG1407	FBtr0088435	CG1407-RB	1857	0.979991	0.252294
FBgn0003638	su(w[a])	FBtr0070177	su(w[a])-RB	4056	0.979469	0.642079
FBgn0265784	CrebB	FBtr0310340	CrebB-RN	2138	0.978852	0.778551
FBgn0259916	CG42445	FBtr0332760	CG42445-RB	1062	0.978764	0.263159
FBgn0035266	Gk2	FBtr0072767	Gk2-RC	2336	0.978387	5.20562e-06
FBgn0024509	Sec13	FBtr0346160	Sec13-RB	1809	0.977793	0.545053
FBgn0027498	CG2061	FBtr0073429	CG2061-RA	1990	0.97657	0.419084
FBgn0260860	Bet5	FBtr0085570	Bet5-RA	1051	0.975848	5.20562e-06
FBgn0051118	RabX4	FBtr0084736	RabX4-RA	1416	0.975714	0.13639
FBgn0031484	CG3165	FBtr0077642	CG3165-RA	1323	0.975132	0.330013
FBgn0261067	LSm1	FBtr0071628	LSm1-RA	588	0.974608	5.20562e-06
FBgn0003415	skd	FBtr0078328	skd-RD	10465	0.973408	0.692916
FBgn0035839	CG7550	FBtr0076736	CG7550-RA	920	0.973041	0.168237
FBgn0045866	bai	FBtr0084758	bai-RA	807	0.972914	5.20562e-06
FBgn0051441	CG31441	FBtr0339400	CG31441-RB	1223	0.972248	0.419084
FBgn0051122	CG31122	FBtr0333831	CG31122-RC	3439	0.972175	0.126065
FBgn0053198	pen-2	FBtr0340331	pen-2-RB	1181	0.971975	0.145538
FBgn0284421	Psn	FBtr0078192	Psn-RA	2048	0.971262	0.703402
FBgn0032391	escl	FBtr0080286	escl-RA	1809	0.970414	0.457087
FBgn0038268	CG3631	FBtr0082997	CG3631-RC	2776	0.970224	0.585274
FBgn0034224	insb	FBtr0345651	insb-RB	1059	0.970137	0.252294
FBgn0026250	eIF1A	FBtr0343927	eIF1A-RC	1646	0.969479	5.20562e-06
FBgn0040793	CG7630	FBtr0075217	CG7630-RA	417	0.969423	0.280079
FBgn0033897	Rcd1	FBtr0310670	Rcd1-RF	3437	0.968776	0.753969
FBgn0037885	CG17721	FBtr0082354	CG17721-RA	844	0.96795	0.126065
FBgn0265193	Atf-2	FBtr0339096	Atf-2-RA	1349	0.967762	5.20562e-06
FBgn0038755	Hs6st	FBtr0083846	Hs6st-RA	2657	0.9676	5.20562e-06
FBgn0030268	Klp10A	FBtr0073475	Klp10A-RA	3503	0.966559	0.240862
FBgn0013750	Arf51F	FBtr0087378	Arf51F-RA	1352	0.965257	5.20562e-06
FBgn0029976	snz	FBtr0071092	snz-RA	4246	0.964563	0.181317
FBgn0038256	CG7530	FBtr0083021	CG7530-RC	1704	0.964144	0.168237
FBgn0034535	CG11110	FBtr0086231	CG11110-RA	752	0.962898	5.20562e-06
FBgn0015776	nrv1	FBtr0332370	nrv1-RB	1926	0.962713	5.20562e-06
FBgn0034398	CG15098	FBtr0086629	CG15098-RA	953	0.962618	5.20562e-06
FBgn0035397	CG11486	FBtr0072994	CG11486-RC	4553	0.962474	0.832863
FBgn0025381	rush	FBtr0070259	rush-RA	2082	0.962157	5.20562e-06
FBgn0029094	asf1	FBtr0074947	asf1-RA	1505	0.961475	5.20562e-06
FBgn0027513	ana2	FBtr0088685	ana2-RA	1432	0.960663	0.179692
FBgn0029709	CHOp24	FBtr0070675	CHOp24-RA	1104	0.960479	5.20562e-06
FBgn0038829	CG17271	FBtr0083993	CG17271-RA	1550	0.960157	0.126065
FBgn0011300	babo	FBtr0088659	babo-RA	4776	0.95963	5.20562e-06
FBgn0010612	ATPsynG	FBtr0080167	ATPsynG-RA	497	0.959455	0.280079
FBgn0266717	Bruce	FBtr0331681	Bruce-RB	15702	0.959193	0.878965
FBgn0266098	rg	FBtr0344648	rg-RM	14745	0.958886	0.946877
FBgn0002973	numb	FBtr0079822	numb-RA	3309	0.958735	0.382835
FBgn0001624	dlg1	FBtr0308088	dlg1-RP	4841	0.958598	0.594466
FBgn0266284	Ns3	FBtr0339578	Ns3-RB	2176	0.95787	0.18537
FBgn0038747	RhoGAP92B	FBtr0344351	RhoGAP92B-RB	3013	0.95777	0.785835
FBgn0020621	Pkn	FBtr0306585	Pkn-RL	4562	0.956896	0.426048
FBgn0039172	Spase22-23	FBtr0305044	Spase22-23-RB	1694	0.956284	0.376268
FBgn0022349	CG1910	FBtr0085840	CG1910-RD	2698	0.955933	0.8724
FBgn0034093	CG15706	FBtr0344081	CG15706-RF	2419	0.955603	0.419084
FBgn0028697	RpL15	FBtr0308333	RpL15-RF	788	0.955385	5.20562e-06
FBgn0036769	Tsp74F	FBtr0075155	Tsp74F-RB	1519	0.95475	0.126065
FBgn0014342	mia	FBtr0300009	mia-RB	1812	0.954343	0.309732
FBgn0052850	CG32850	FBtr0333680	CG32850-RB	3965	0.953991	0.192125
FBgn0038437	Sdhaf3	FBtr0083308	Sdhaf3-RA	470	0.953772	0.13639
FBgn0262733	Src64B	FBtr0304989	Src64B-RI	4338	0.952755	0.126065
FBgn0003041	pbl	FBtr0076774	pbl-RD	4685	0.95262	0.896621
FBgn0029161	slmo	FBtr0079217	slmo-RA	1281	0.952297	5.20562e-06
FBgn0086711	mol	FBtr0332521	mol-RG	2017	0.951856	0.839464
FBgn0037298	Sccpdh1	FBtr0078830	Sccpdh1-RB	1636	0.951691	0.195081
FBgn0265194	Trpm	FBtr0339081	Trpm-RI	7638	0.951519	0.524191
FBgn0015569	alpha-Est10	FBtr0289953	alpha-Est10-RB	2161	0.950384	5.20562e-06
FBgn0040020	MED21	FBtr0113740	MED21-RA	859	0.948937	0.650595
FBgn0036342	CG11279	FBtr0332077	CG11279-RB	927	0.948249	0.554553
FBgn0000394	cv	FBtr0070804	cv-RA	1893	0.948059	0.192125
FBgn0030174	CG15312	FBtr0309219	CG15312-RD	3082	0.947105	0.65743
FBgn0267728	otk2	FBtr0088027	otk2-RA	1968	0.946967	5.20562e-06
FBgn0030451	CG15717	FBtr0344608	CG15717-RE	1150	0.946779	0.376268
FBgn0013531	MED20	FBtr0079544	MED20-RA	1037	0.945951	5.20562e-06
FBgn0038576	Arp5	FBtr0083557	Arp5-RA	2320	0.944897	0.626966
FBgn0001077	ftz	FBtr0081625	ftz-RA	1774	0.944514	0.27502
FBgn0265784	CrebB	FBtr0074557	CrebB-RF	2072	0.943986	5.20562e-06
FBgn0035405	CG15812	FBtr0073028	CG15812-RB	1913	0.943609	0.878965
FBgn0061515	endos	FBtr0304673	endos-RC	1338	0.942833	0.126065
FBgn0036853	mRpL21	FBtr0346548	mRpL21-RC	1696	0.942281	5.20562e-06
FBgn0001941	ifc	FBtr0332599	ifc-RB	1656	0.94185	0.839464
FBgn0037634	hng2	FBtr0081919	hng2-RA	1207	0.941703	5.20562e-06
FBgn0033639	CG9003	FBtr0113069	CG9003-RD	2902	0.94158	5.20562e-06
FBgn0030030	CG1636	FBtr0339833	CG1636-RB	2325	0.941414	0.426048
FBgn0025674	CycK	FBtr0085942	CycK-RB	1679	0.94011	0.403819
FBgn0264492	CkIIalpha	FBtr0070042	CkIIalpha-RA	1536	0.938099	0.209592
FBgn0031682	CG5828	FBtr0329981	CG5828-RB	1935	0.937956	0.531116
FBgn0040208	Kat60	FBtr0334909	Kat60-RB	2662	0.937894	0.291361
FBgn0083992	Mkp	FBtr0344094	Mkp-RD	1603	0.937572	0.785835
FBgn0033624	CG12384	FBtr0088155	CG12384-RA	612	0.937276	5.20562e-06
FBgn0030465	CG15743	FBtr0346123	CG15743-RC	1959	0.936854	0.672985
FBgn0034543	galla-1	FBtr0086236	galla-1-RA	954	0.936771	0.142102
FBgn0266719	stac	FBtr0334505	stac-RE	3671	0.936448	0.4397
FBgn0000228	Bsg25D	FBtr0310625	Bsg25D-RG	4666	0.935159	0.957411
FBgn0034919	CG5569	FBtr0072128	CG5569-RA	774	0.934998	0.126065
FBgn0036545	GXIVsPLA2	FBtr0075509	GXIVsPLA2-RA	1016	0.934138	0.152707
FBgn0030400	Pits	FBtr0073662	Pits-RC	5226	0.93392	0.753969
FBgn0022027	Vps25	FBtr0088694	Vps25-RA	678	0.932974	0.126065
FBgn0031309	Tfb4	FBtr0077985	Tfb4-RA	999	0.93259	5.20562e-06
FBgn0032790	CG10194	FBtr0081285	CG10194-RA	1215	0.931915	5.20562e-06
FBgn0051855	CG31855	FBtr0080467	CG31855-RA	1064	0.931548	0.149336
FBgn0031971	Sirup	FBtr0079532	Sirup-RA	650	0.930888	0.126065
FBgn0001977	CIAPIN1	FBtr0080725	CIAPIN1-RA	2358	0.930153	5.20562e-06
FBgn0017551	Rca1	FBtr0079342	Rca1-RA	1552	0.930054	5.20562e-06
FBgn0034126	jtb	FBtr0087157	jtb-RA	822	0.929829	5.20562e-06
FBgn0037235	CG1103	FBtr0078909	CG1103-RA	1343	0.929553	5.20562e-06
FBgn0039881	CG1971	FBtr0344004	CG1971-RD	1028	0.929241	0.738593
FBgn0032858	CG10949	FBtr0081367	CG10949-RA	1539	0.929062	5.20562e-06
FBgn0039993	CG17691	FBtr0302410	CG17691-RF	479	0.928848	0.330013
FBgn0033185	CG1603	FBtr0336925	CG1603-RB	2368	0.927973	0.176514
FBgn0051523	CG31523	FBtr0078935	CG31523-RC	2627	0.927048	0.39016
FBgn0013720	pck	FBtr0070256	pck-RC	1289	0.926565	0.181317
FBgn0031459	CG2862	FBtr0077718	CG2862-RA	644	0.926496	0.323524
FBgn0003114	plu	FBtr0086306	plu-RA	616	0.926385	5.20562e-06
FBgn0039329	CG10669	FBtr0300687	CG10669-RB	3310	0.92638	0.562225
FBgn0000083	AnxB9	FBtr0089519	AnxB9-RC	1432	0.925741	0.224858
FBgn0004390	RasGAP1	FBtr0076368	RasGAP1-RB	5434	0.925638	0.296093
FBgn0011327	Uch-L5	FBtr0076472	Uch-L5-RA	1394	0.9252	5.20562e-06
FBgn0001325	Kr	FBtr0072449	Kr-RA	2536	0.924718	0.34252
FBgn0036366	JMJD7	FBtr0075825	JMJD7-RA	1097	0.923582	5.20562e-06
FBgn0033166	Eaf	FBtr0089008	Eaf-RA	3095	0.923475	0.753969
FBgn0037262	MED31	FBtr0078856	MED31-RA	1098	0.922864	0.475788
FBgn0030745	CG4239	FBtr0340314	CG4239-RD	1756	0.92266	0.634122
FBgn0031597	CG17612	FBtr0077464	CG17612-RA	1940	0.921171	0.721419
FBgn0029913	Cht11	FBtr0071041	Cht11-RA	1576	0.920962	5.20562e-06
FBgn0001987	Gli	FBtr0343721	Gli-RF	4468	0.9209	0.336441
FBgn0036397	Nprl3	FBtr0333025	Nprl3-RC	2226	0.920754	0.4397
FBgn0032033	CG13392	FBtr0079720	CG13392-RA	754	0.920426	0.611625
FBgn0039417	CG6073	FBtr0307342	CG6073-RB	1275	0.920412	5.20562e-06
FBgn0030964	Pvf1	FBtr0074640	Pvf1-RA	1896	0.919384	5.20562e-06
FBgn0036987	CG5274	FBtr0078232	CG5274-RA	1374	0.919197	0.49271
FBgn0035435	PIG-C	FBtr0300753	PIG-C-RB	1103	0.918637	5.20562e-06
FBgn0066101	LpR1	FBtr0335235	LpR1-RP	3792	0.918492	0.692916
FBgn0029903	pod1	FBtr0112956	pod1-RF	6031	0.918327	0.860178
FBgn0040340	TRAM	FBtr0070168	TRAM-RA	1777	0.917884	0.240862
FBgn0265182	CG44247	FBtr0339097	CG44247-RA	2696	0.917717	0.747887
FBgn0000352	cos	FBtr0089015	cos-RA	4763	0.917671	0.403819
FBgn0005672	spi	FBtr0081269	spi-RB	1634	0.917554	0.181317
FBgn0024841	Pcd	FBtr0085458	Pcd-RA	725	0.917434	5.20562e-06
FBgn0000459	disco	FBtr0074250	disco-RA	3247	0.917262	0.411308
FBgn0039465	Tsp97E	FBtr0344665	Tsp97E-RH	2094	0.916926	0.594466
FBgn0037960	mthl5	FBtr0344288	mthl5-RB	1952	0.916609	0.509645
FBgn0003206	Ras64B	FBtr0073212	Ras64B-RA	1620	0.91633	5.20562e-06
FBgn0003261	Rm62	FBtr0078654	Rm62-RF	2833	0.916289	0.65743
FBgn0033341	MrgBP	FBtr0088684	MrgBP-RA	758	0.915011	5.20562e-06
FBgn0001105	Gbeta13F	FBtr0074107	Gbeta13F-RA	1921	0.913119	0.626966
FBgn0250843	Prosalpha6	FBtr0343606	Prosalpha6-RB	1070	0.913017	0.403819
FBgn0040389	mRpL14	FBtr0333730	mRpL14-RB	597	0.912491	0.570134
FBgn0262116	RNASEK	FBtr0334986	RNASEK-RB	1160	0.912082	0.256896
FBgn0032162	CG4592	FBtr0331632	CG4592-RB	1105	0.911325	5.20562e-06
FBgn0030610	CG9065	FBtr0073966	CG9065-RA	521	0.911064	5.20562e-06
FBgn0039959	CG17514	FBtr0334934	CG17514-RG	541	0.911002	0.179692
FBgn0033226	CG1882	FBtr0088834	CG1882-RA	1954	0.910105	0.570134
FBgn0039251	Trf4-2	FBtr0084718	Trf4-2-RA	1870	0.910063	0.18537
FBgn0061198	HSPC300	FBtr0072194	HSPC300-RA	349	0.909027	5.20562e-06
FBgn0030028	Corp	FBtr0071179	Corp-RA	1084	0.907777	5.20562e-06
FBgn0052423	shep	FBtr0077174	shep-RB	7989	0.90714	0.240862
FBgn0020224	Cbl	FBtr0076614	Cbl-RA	2948	0.907073	5.20562e-06
FBgn0261609	eIF2alpha	FBtr0074300	eIF2alpha-RA	1200	0.90686	0.195081
FBgn0003209	raw	FBtr0340232	raw-RE	4275	0.906819	0.634122
FBgn0039790	CG2246	FBtr0085677	CG2246-RF	1840	0.906819	0.362239
FBgn0046301	CG7148	FBtr0078448	CG7148-RA	1594	0.90584	5.20562e-06
FBgn0050382	CG30382	FBtr0302223	CG30382-RB	885	0.905036	0.570134
FBgn0039875	sip3	FBtr0330113	sip3-RB	2660	0.904182	0.176514
FBgn0038306	Art3	FBtr0083135	Art3-RB	1804	0.90405	0.330013
FBgn0000308	chic	FBtr0309212	chic-RE	988	0.903006	0.20663
FBgn0032236	mRpS7	FBtr0080007	mRpS7-RA	789	0.902586	5.20562e-06
FBgn0032513	CG6565	FBtr0080468	CG6565-RA	1930	0.902187	0.145538
FBgn0015000	betaggt-I	FBtr0078991	betaggt-I-RA	1784	0.901975	5.20562e-06
FBgn0260794	ctrip	FBtr0303911	ctrip-RB	10587	0.901842	0.770355
FBgn0085295	CG34266	FBtr0112461	CG34266-RA	402	0.90169	0.509645
FBgn0016131	Cdk4	FBtr0087102	Cdk4-RC	1502	0.901655	0.896621
FBgn0013732	sced	FBtr0086110	sced-RA	3299	0.901621	0.285479
FBgn0033235	CG8728	FBtr0088882	CG8728-RA	1935	0.901294	5.20562e-06
FBgn0086372	lap	FBtr0302184	lap-RD	5216	0.901042	0.554553
FBgn0001137	grk	FBtr0079708	grk-RA	1718	0.900798	0.13639
FBgn0032586	Tpr2	FBtr0333487	Tpr2-RD	2503	0.900739	0.246243
FBgn0040308	Jafrac2	FBtr0072982	Jafrac2-RA	1047	0.900067	5.20562e-06
FBgn0086898	dgo	FBtr0088249	dgo-RA	3142	0.899926	5.20562e-06
FBgn0010317	CycJ	FBtr0073127	CycJ-RA	1478	0.89971	5.20562e-06
FBgn0000565	Eip71CD	FBtr0075552	Eip71CD-RC	1090	0.899261	0.252294
FBgn0030174	CG15312	FBtr0071423	CG15312-RC	3511	0.899146	0.368863
FBgn0039929	CG11076	FBtr0089221	CG11076-RA	1265	0.899001	0.403819
FBgn0039153	GatB	FBtr0084584	GatB-RA	1786	0.898924	5.20562e-06
FBgn0038387	blp	FBtr0083203	blp-RA	955	0.898608	5.20562e-06
FBgn0034626	CG10795	FBtr0071609	CG10795-RA	1100	0.898472	5.20562e-06
FBgn0010607	l(2)05714	FBtr0079050	l(2)05714-RA	1049	0.897447	5.20562e-06
FBgn0041174	Vhl	FBtr0088115	Vhl-RA	1309	0.897222	0.18537
FBgn0015602	BEAF-32	FBtr0305588	BEAF-32-RC	1558	0.896254	0.181317
FBgn0063670	CG40228	FBtr0333872	CG40228-RF	426	0.895589	5.20562e-06
FBgn0030704	CG15916	FBtr0074117	CG15916-RA	959	0.895361	5.20562e-06
FBgn0011361	ND-ACP	FBtr0072677	ND-ACP-RB	625	0.89523	5.20562e-06
FBgn0034753	CG2852	FBtr0345504	CG2852-RD	1177	0.894688	0.142102
FBgn0034743	RpS16	FBtr0071855	RpS16-RA	573	0.894286	5.20562e-06
FBgn0036974	eRF1	FBtr0078173	eRF1-RC	1765	0.893697	0.753969
FBgn0026257	cav	FBtr0084559	cav-RB	1226	0.892909	5.20562e-06
FBgn0261538	CG42662	FBtr0302554	CG42662-RA	1100	0.892775	0.330013
FBgn0030328	Amun	FBtr0303339	Amun-RI	2986	0.892668	0.611625
FBgn0052495	Gss2	FBtr0300978	Gss2-RG	1938	0.892131	0.403819
FBgn0001941	ifc	FBtr0079179	ifc-RA	1784	0.891933	5.20562e-06
FBgn0038890	CG7956	FBtr0301212	CG7956-RE	3770	0.890912	0.554553
FBgn0031774	CG9147	FBtr0079190	CG9147-RA	1440	0.890879	0.142102
FBgn0036908	TORIP	FBtr0333878	TORIP-RB	1221	0.890807	0.336441
FBgn0063492	GstE8	FBtr0345798	GstE8-RB	1122	0.890366	0.4397
FBgn0025936	Eph	FBtr0089082	Eph-RA	4142	0.890211	0.403819
FBgn0034657	LBR	FBtr0071711	LBR-RB	2719	0.890168	0.501434
FBgn0067102	GlcT	FBtr0071755	GlcT-RA	3394	0.88996	5.20562e-06
FBgn0032390	dgt2	FBtr0342580	dgt2-RB	987	0.889374	0.176514
FBgn0040777	CG14767	FBtr0088718	CG14767-RA	2120	0.889251	0.13639
FBgn0035461	ntc	FBtr0073185	ntc-RA	1572	0.889076	5.20562e-06
FBgn0031878	sip2	FBtr0079358	sip2-RB	2223	0.888364	0.240862
FBgn0031312	Tango14	FBtr0077961	Tango14-RA	1272	0.888331	5.20562e-06
FBgn0033998	row	FBtr0087402	row-RA	4414	0.886987	5.20562e-06
FBgn0039132	AP-1sigma	FBtr0084496	AP-1sigma-RA	1079	0.886454	5.20562e-06
FBgn0020309	crol	FBtr0305262	crol-RE	6150	0.88621	0.562225
FBgn0035159	CG13896	FBtr0331770	CG13896-RC	974	0.885852	0.145538
FBgn0267975	vib	FBtr0083745	vib-RA	1178	0.885573	5.20562e-06
FBgn0261547	Exn	FBtr0302647	Exn-RB	3506	0.885294	0.753969
FBgn0259785	pzg	FBtr0078336	pzg-RA	4093	0.883939	0.280079
FBgn0038524	sll	FBtr0083462	sll-RA	1987	0.883277	5.20562e-06
FBgn0037655	Kcmf1	FBtr0300744	Kcmf1-RE	2481	0.882354	0.778551
FBgn0031247	CG11562	FBtr0078130	CG11562-RA	748	0.881867	5.20562e-06
FBgn0001226	Hsp27	FBtr0346541	Hsp27-RB	1632	0.881692	0.13639
FBgn0000114	bru1	FBtr0080345	bru1-RA	2651	0.88152	0.296093
FBgn0034958	CG3907	FBtr0072196	CG3907-RA	1701	0.880852	5.20562e-06
FBgn0030838	CG5445	FBtr0339777	CG5445-RF	1740	0.880671	0.483314
FBgn0067779	dbr	FBtr0306538	dbr-RE	3454	0.880669	0.798004
FBgn0040634	CG4186	FBtr0345810	CG4186-RB	444	0.880548	0.156184
FBgn0028993	scro	FBtr0339923	scro-RF	1492	0.880224	0.303186
FBgn0039637	Ctl2	FBtr0085372	Ctl2-RB	3463	0.880212	0.791891
FBgn0042185	MCU	FBtr0344294	MCU-RI	1775	0.880023	0.449308
FBgn0027518	Wdr24	FBtr0085543	Wdr24-RB	2699	0.87951	0.524191
FBgn0040773	COX7C	FBtr0088397	COX7C-RB	418	0.879476	0.246243
FBgn0015509	Cul1	FBtr0088847	Cul1-RA	3207	0.879438	0.703402
FBgn0031060	CG14231	FBtr0309217	CG14231-RB	1881	0.878909	0.192125
FBgn0010583	dock	FBtr0078013	dock-RA	3735	0.878749	0.269895
FBgn0030571	CG14414	FBtr0073932	CG14414-RC	841	0.878374	0.188944
FBgn0052581	CG32581	FBtr0113439	CG32581-RB	1345	0.876313	0.501434
FBgn0034051	Mlf	FBtr0306650	Mlf-RG	1501	0.875445	0.562225
FBgn0260972	alc	FBtr0088624	alc-RA	1544	0.874608	0.126065
FBgn0036990	mRpL15	FBtr0078227	mRpL15-RA	1029	0.873639	5.20562e-06
FBgn0264357	SNF4Agamma	FBtr0301588	SNF4Agamma-RR	6292	0.872532	0.509645
FBgn0031047	Rcd-1	FBtr0334277	Rcd-1-RC	1725	0.872529	0.376268
FBgn0039994	conu	FBtr0111285	conu-RD	2091	0.872419	0.168237
FBgn0015756	RpL9	FBtr0340226	RpL9-RC	807	0.87188	0.457087
FBgn0027594	drpr	FBtr0072799	drpr-RB	4517	0.871746	0.86713
FBgn0031632	CG15628	FBtr0336962	CG15628-RB	3932	0.871234	0.650595
FBgn0033692	wash	FBtr0339595	wash-RB	1796	0.87091	0.839464
FBgn0038429	CG14882	FBtr0337015	CG14882-RB	1754	0.870053	0.142102
FBgn0085442	NKAIN	FBtr0301851	NKAIN-RJ	2311	0.869812	5.20562e-06
FBgn0037084	Syx6	FBtr0088104	Syx6-RD	1982	0.869197	0.195081
FBgn0039869	CG1890	FBtr0085836	CG1890-RA	704	0.869078	5.20562e-06
FBgn0036761	MED19	FBtr0345815	MED19-RB	1853	0.868541	0.165641
FBgn0027375	RecQ5	FBtr0075714	RecQ5-RA	3739	0.8677	0.738593
FBgn0260997	CG42598	FBtr0343637	CG42598-RB	1158	0.867694	0.323524
FBgn0263602	Tasp1	FBtr0075498	Tasp1-RA	1503	0.86767	5.20562e-06
FBgn0026402	NiPp1	FBtr0087058	NiPp1-RA	1349	0.866595	5.20562e-06
FBgn0058191	CG40191	FBtr0113824	CG40191-RB	1579	0.866489	0.578465
FBgn0030357	Sclp	FBtr0302182	Sclp-RB	770	0.866216	0.145538
FBgn0034877	levy	FBtr0072061	levy-RA	593	0.865853	0.269895
FBgn0016034	mael	FBtr0089633	mael-RA	1759	0.864969	0.672985
FBgn0030504	CG2691	FBtr0073848	CG2691-RA	4477	0.86348	0.296093
FBgn0263598	Vha68-2	FBtr0080420	Vha68-2-RC	2531	0.863228	0.509645
FBgn0026737	CG6171	FBtr0112926	CG6171-RB	947	0.862876	5.20562e-06
FBgn0035848	Uxs	FBtr0076690	Uxs-RA	2093	0.862004	5.20562e-06
FBgn0061515	endos	FBtr0075782	endos-RA	1110	0.861958	5.20562e-06
FBgn0052451	SPoCk	FBtr0078532	SPoCk-RC	3716	0.861611	0.634122
FBgn0261573	CoRest	FBtr0307902	CoRest-RI	3255	0.861329	0.220584
FBgn0037664	CG8420	FBtr0081973	CG8420-RA	1959	0.861166	5.20562e-06
FBgn0261722	fwe	FBtr0075543	fwe-RC	2364	0.86078	0.174106
FBgn0267330	KdelR	FBtr0080021	KdelR-RA	1201	0.860506	5.20562e-06
FBgn0029894	CG14440	FBtr0070987	CG14440-RA	2638	0.85893	0.161869
FBgn0040022	Set1	FBtr0302246	Set1-RG	5279	0.858628	0.770355
FBgn0031987	CG12375	FBtr0079642	CG12375-RA	1165	0.858394	5.20562e-06
FBgn0054001	CG34001	FBtr0300947	CG34001-RB	587	0.858294	5.20562e-06
FBgn0025615	Torsin	FBtr0345715	Torsin-RB	1383	0.857991	0.330013
FBgn0263772	CG43689	FBtr0339681	CG43689-RH	6858	0.857789	0.411308
FBgn0037609	CG9773	FBtr0081953	CG9773-RA	1021	0.857558	5.20562e-06
FBgn0051005	qless	FBtr0085769	qless-RA	3218	0.857334	5.20562e-06
FBgn0016970	l(2)k10201	FBtr0088505	l(2)k10201-RA	820	0.856927	5.20562e-06
FBgn0039602	CG1647	FBtr0085326	CG1647-RA	4103	0.856646	5.20562e-06
FBgn0261938	mtRNApol	FBtr0332273	mtRNApol-RB	4718	0.856366	0.832863
FBgn0011217	eff	FBtr0336876	eff-RC	1913	0.855812	5.20562e-06
FBgn0038947	Sar1	FBtr0084206	Sar1-RA	1503	0.855111	0.156184
FBgn0034081	CG10731	FBtr0344527	CG10731-RB	828	0.854956	5.20562e-06
FBgn0031287	CG4291	FBtr0334797	CG4291-RB	1310	0.854677	0.524191
FBgn0259985	Mppe	FBtr0088024	Mppe-RA	1757	0.854616	0.145538
FBgn0035169	Dci	FBtr0072587	Dci-RA	1210	0.854487	5.20562e-06
FBgn0038446	CG14903	FBtr0083303	CG14903-RA	442	0.85414	5.20562e-06
FBgn0262976	lawc	FBtr0307286	lawc-RC	2632	0.853876	0.181317
FBgn0263593	Lpin	FBtr0303585	Lpin-RM	4369	0.85318	0.692916
FBgn0010651	MFS14	FBtr0345426	MFS14-RC	2337	0.852805	0.240862
FBgn0265998	Doa	FBtr0299748	Doa-RS	2904	0.852626	0.296093
FBgn0002626	RpL32	FBtr0085594	RpL32-RA	578	0.852516	0.168237
FBgn0020621	Pkn	FBtr0302603	Pkn-RJ	4970	0.852277	0.731002
FBgn0026083	tyf	FBtr0301124	tyf-RF	8145	0.851714	0.509645
FBgn0039251	Trf4-2	FBtr0337011	Trf4-2-RB	1429	0.851692	5.20562e-06
FBgn0012051	CalpA	FBtr0086529	CalpA-RB	2797	0.851668	0.349361
FBgn0261933	SmD1	FBtr0075952	SmD1-RA	729	0.850785	5.20562e-06
FBgn0030478	CG1640	FBtr0073772	CG1640-RE	2357	0.850778	0.524191
FBgn0037084	Syx6	FBtr0088103	Syx6-RB	1361	0.850573	5.20562e-06
FBgn0032400	CG6770	FBtr0080306	CG6770-RA	776	0.848371	5.20562e-06
FBgn0053207	pxb	FBtr0083162	pxb-RB	3024	0.84811	0.411308
FBgn0032259	CG6144	FBtr0304137	CG6144-RC	1553	0.848081	5.20562e-06
FBgn0261597	RpS26	FBtr0081091	RpS26-RC	1112	0.847492	0.158791
FBgn0034455	CG11007	FBtr0345929	CG11007-RB	1527	0.847462	0.209592
FBgn0015402	ksr	FBtr0078766	ksr-RA	3600	0.847289	0.246243
FBgn0003317	sax	FBtr0088833	sax-RB	2716	0.847198	0.426048
FBgn0031413	CG9967	FBtr0077799	CG9967-RA	1647	0.847023	0.233605
FBgn0016119	ATPsynCF6	FBtr0333777	ATPsynCF6-RC	586	0.846654	0.168237
FBgn0004087	Dhfr	FBtr0110910	Dhfr-RB	662	0.845005	0.165641
FBgn0034091	mrj	FBtr0113084	mrj-RE	2331	0.844805	0.142102
FBgn0030699	CG8578	FBtr0346189	CG8578-RC	1847	0.844426	0.65743
FBgn0262975	cnc	FBtr0306744	cnc-RF	3575	0.843951	0.896621
FBgn0032901	sky	FBtr0081445	sky-RF	3041	0.843925	0.256896
FBgn0039406	RpL34a	FBtr0084972	RpL34a-RA	606	0.843777	0.170847
FBgn0051279	CG31279	FBtr0337014	CG31279-RG	643	0.842788	0.355029
FBgn0086447	l(2)37Cg	FBtr0081161	l(2)37Cg-RA	404	0.842711	0.188944
FBgn0267330	KdelR	FBtr0080023	KdelR-RC	1679	0.842681	0.126065
FBgn0038057	CG12267	FBtr0082635	CG12267-RA	1592	0.842657	0.65743
FBgn0001128	Gpdh1	FBtr0079146	Gpdh1-RB	1651	0.841886	5.20562e-06
FBgn0032921	Mpp6	FBtr0343869	Mpp6-RB	680	0.841565	5.20562e-06
FBgn0030391	Rab40	FBtr0073669	Rab40-RB	1618	0.841327	5.20562e-06
FBgn0051249	CG31249	FBtr0083483	CG31249-RA	1176	0.841261	5.20562e-06
FBgn0010288	Uch	FBtr0077844	Uch-RA	1196	0.840271	0.770355
FBgn0036816	Indy	FBtr0075082	Indy-RC	2600	0.840209	0.483314
FBgn0261573	CoRest	FBtr0307901	CoRest-RH	3155	0.839777	0.483314
FBgn0036853	mRpL21	FBtr0333224	mRpL21-RB	866	0.838963	5.20562e-06
FBgn0032034	Rcd4	FBtr0079652	Rcd4-RA	733	0.838077	0.291361
FBgn0261560	Thor	FBtr0077524	Thor-RA	755	0.837416	0.403819
FBgn0043001	Chrac-16	FBtr0339625	Chrac-16-RB	737	0.83711	0.13639
FBgn0016726	RpL29	FBtr0071592	RpL29-RA	329	0.837016	0.168237
FBgn0001092	Gapdh2	FBtr0074112	Gapdh2-RA	1443	0.836874	0.240862
FBgn0031379	CG7289	FBtr0077815	CG7289-RA	2130	0.836671	5.20562e-06
FBgn0037797	CG12420	FBtr0082222	CG12420-RA	855	0.836598	0.161869
FBgn0003371	sgg	FBtr0301966	sgg-RN	3182	0.836358	0.738593
FBgn0283658	muc	FBtr0332526	muc-RC	2078	0.8359	0.355029
FBgn0035148	CG3402	FBtr0072559	CG3402-RA	1035	0.835754	5.20562e-06
FBgn0004143	nullo	FBtr0299565	nullo-RB	846	0.835731	0.233605
FBgn0023095	caps	FBtr0075832	caps-RA	4841	0.835568	0.483314
FBgn0069242	eca	FBtr0082098	eca-RA	946	0.835527	5.20562e-06
FBgn0031036	CG14220	FBtr0074768	CG14220-RA	1312	0.835039	5.20562e-06
FBgn0083167	Neb-cGP	FBtr0332952	Neb-cGP-RB	987	0.834998	0.330013
FBgn0031457	CG3077	FBtr0077736	CG3077-RA	1372	0.834712	0.126065
FBgn0033483	egr	FBtr0088406	egr-RB	2148	0.834563	0.538029
FBgn0032752	CG10702	FBtr0081176	CG10702-RC	3893	0.834548	0.703402
FBgn0267376	SelR	FBtr0082294	SelR-RC	1123	0.834158	0.602278
FBgn0038363	Acyp2	FBtr0334591	Acyp2-RB	619	0.83413	0.626966
FBgn0016726	RpL29	FBtr0071593	RpL29-RB	389	0.833971	0.27502
FBgn0039159	mRpS24	FBtr0084577	mRpS24-RA	600	0.833611	0.152707
FBgn0031266	Sf3b1	FBtr0332340	Sf3b1-RB	4346	0.833556	0.980736
FBgn0039465	Tsp97E	FBtr0085082	Tsp97E-RA	1433	0.833329	5.20562e-06
FBgn0030838	CG5445	FBtr0074427	CG5445-RA	1943	0.832874	0.168237
FBgn0035424	Larp4B	FBtr0073045	Larp4B-RA	5172	0.83242	0.269895
FBgn0005777	PpD3	FBtr0082128	PpD3-RA	2509	0.83198	0.531116
FBgn0031834	CG13766	FBtr0343161	CG13766-RB	2070	0.831939	0.634122
FBgn0086655	jing	FBtr0301636	jing-RD	4817	0.831584	0.209592
FBgn0005278	Sam-S	FBtr0089434	Sam-S-RI	2429	0.831553	0.475788
FBgn0003345	sd	FBtr0301544	sd-RI	3280	0.831332	0.619158
FBgn0011509	SrpRbeta	FBtr0333891	SrpRbeta-RB	1135	0.830635	5.20562e-06
FBgn0034858	eIF2Bdelta	FBtr0302315	eIF2Bdelta-RD	2098	0.829969	0.65743
FBgn0039188	Golgin84	FBtr0084629	Golgin84-RA	1814	0.829364	5.20562e-06
FBgn0035087	CG2765	FBtr0308687	CG2765-RF	2310	0.829232	5.20562e-06
FBgn0053062	CG33062	FBtr0302887	CG33062-RB	933	0.829141	0.209592
FBgn0030744	CG9992	FBtr0074308	CG9992-RD	1608	0.82826	0.240862
FBgn0030745	CG4239	FBtr0074270	CG4239-RB	1824	0.828028	0.812666
FBgn0023213	eIF4G1	FBtr0289951	eIF4G1-RC	5806	0.826498	0.762127
FBgn0030030	CG1636	FBtr0071171	CG1636-RA	2124	0.824729	0.181317
FBgn0013432	bcn92	FBtr0070431	bcn92-RA	748	0.824221	0.145538
FBgn0020386	Pdk1	FBtr0072467	Pdk1-RF	4162	0.823951	0.952894
FBgn0087040	alphaTub67C	FBtr0076393	alphaTub67C-RA	1617	0.823714	5.20562e-06
FBgn0011659	Mlh1	FBtr0331379	Mlh1-RB	2068	0.82347	0.642079
FBgn0000330	cm	FBtr0071033	cm-RA	1469	0.822934	5.20562e-06
FBgn0259243	Pka-R1	FBtr0299891	Pka-R1-RK	2245	0.822888	5.20562e-06
FBgn0033166	Eaf	FBtr0089007	Eaf-RD	3869	0.822156	0.382835
FBgn0261445	sgl	FBtr0076938	sgl-RA	2275	0.821595	5.20562e-06
FBgn0000339	cni	FBtr0080848	cni-RA	811	0.821531	0.149336
FBgn0039099	GILT2	FBtr0084435	GILT2-RA	712	0.821469	5.20562e-06
FBgn0034729	CG10344	FBtr0071841	CG10344-RB	1190	0.821364	5.20562e-06
FBgn0035936	Tsp66E	FBtr0076506	Tsp66E-RB	2155	0.82124	0.738593
FBgn0003525	stg	FBtr0085397	stg-RA	2589	0.820828	0.176514
FBgn0035285	CG12025	FBtr0332668	CG12025-RB	1992	0.820184	0.152707
FBgn0035714	CG8549	FBtr0076943	CG8549-RA	1037	0.820114	0.246243
FBgn0010504	kermit	FBtr0088812	kermit-RB	1719	0.819937	0.483314
FBgn0035228	CG12091	FBtr0072831	CG12091-RA	1824	0.819759	0.962172
FBgn0003396	shn	FBtr0088100	shn-RC	9026	0.81922	0.8724
FBgn0004867	RpS2	FBtr0345436	RpS2-RC	947	0.819079	0.269895
FBgn0004595	pros	FBtr0304606	pros-RK	7890	0.818976	0.316147
FBgn0038268	CG3631	FBtr0344378	CG3631-RE	2710	0.818574	0.798004
FBgn0043070	MESK2	FBtr0089709	MESK2-RA	2646	0.818518	0.602278
FBgn0035333	CG1317	FBtr0345587	CG1317-RD	3836	0.818405	0.34252
FBgn0030114	CG17754	FBtr0340123	CG17754-RG	2539	0.818322	0.747887
FBgn0001120	gnu	FBtr0075697	gnu-RA	923	0.817705	5.20562e-06
FBgn0058045	CG40045	FBtr0331586	CG40045-RD	737	0.817045	0.330013
FBgn0263598	Vha68-2	FBtr0336614	Vha68-2-RF	2528	0.81611	0.602278
FBgn0033785	Sans	FBtr0087791	Sans-RB	1898	0.816	0.626966
FBgn0030323	Vlet	FBtr0073534	Vlet-RC	1246	0.815636	0.256896
FBgn0038453	Arl6IP1	FBtr0333728	Arl6IP1-RB	1178	0.814766	5.20562e-06
FBgn0052554	CG32554	FBtr0074467	CG32554-RA	817	0.814187	0.181317
FBgn0037526	ArgRS-m	FBtr0333826	ArgRS-m-RB	2748	0.813563	0.199262
FBgn0029959	Rab39	FBtr0307272	Rab39-RB	1406	0.813516	0.18537
FBgn0260859	Bet3	FBtr0089879	Bet3-RA	1125	0.813404	5.20562e-06
FBgn0260659	CG42542	FBtr0301101	CG42542-RB	1650	0.813336	5.20562e-06
FBgn0027358	Tim9b	FBtr0344072	Tim9b-RD	1586	0.812979	0.152707
FBgn0003676	CCT1	FBtr0084290	CCT1-RB	1916	0.812599	0.672985
FBgn0283535	Vha26	FBtr0078701	Vha26-RA	2269	0.812422	0.21376
FBgn0032246	Wdfy2	FBtr0080020	Wdfy2-RA	1623	0.812276	0.34252
FBgn0037297	CG1116	FBtr0078775	CG1116-RA	1570	0.81187	0.13639
FBgn0001123	Galphas	FBtr0301411	Galphas-RD	1646	0.811143	0.465757
FBgn0261387	CG17528	FBtr0111277	CG17528-RD	4686	0.810522	5.20562e-06
FBgn0035266	Gk2	FBtr0072768	Gk2-RE	2332	0.810468	0.738593
FBgn0015521	RpS21	FBtr0077621	RpS21-RA	391	0.809422	0.285479
FBgn0025820	JTBR	FBtr0072788	JTBR-RA	849	0.80911	0.465757
FBgn0037802	Sirt6	FBtr0305358	Sirt6-RB	1114	0.808691	5.20562e-06
FBgn0029134	Prosbeta5	FBtr0088224	Prosbeta5-RB	1076	0.808521	0.8724
FBgn0047199	CG31517	FBtr0082864	CG31517-RA	827	0.807849	5.20562e-06
FBgn0285971	prg	FBtr0079674	prg-RA	1984	0.807741	0.411308
FBgn0028292	ric8a	FBtr0346166	ric8a-RB	2970	0.807664	0.475788
FBgn0015521	RpS21	FBtr0335131	RpS21-RF	715	0.80758	5.20562e-06
FBgn0264491	how	FBtr0301402	how-RE	3103	0.807577	0.296093
FBgn0036893	PIG-F	FBtr0074946	PIG-F-RA	1035	0.806893	5.20562e-06
FBgn0250786	Chd1	FBtr0305980	Chd1-RB	6216	0.806608	0.570134
FBgn0082598	akirin	FBtr0076848	akirin-RA	1268	0.806561	5.20562e-06
FBgn0030638	CG11655	FBtr0074031	CG11655-RA	1720	0.806182	0.149336
FBgn0037443	Dmtn	FBtr0289939	Dmtn-RD	3827	0.804906	0.545053
FBgn0261963	mid	FBtr0079093	mid-RA	2920	0.803964	0.256896
FBgn0015268	Nap1	FBtr0305989	Nap1-RB	1393	0.803525	0.21376
FBgn0038745	CG4538	FBtr0344262	CG4538-RD	3865	0.803524	0.457087
FBgn0031047	Rcd-1	FBtr0074743	Rcd-1-RB	1544	0.803421	0.18537
FBgn0035640	mad2	FBtr0077113	mad2-RA	818	0.803408	0.27502
FBgn0017418	ari-1	FBtr0332850	ari-1-RE	3234	0.80334	0.3968
FBgn0261599	RpS29	FBtr0334681	RpS29-RB	1007	0.802819	0.13639
FBgn0033886	Rpn13	FBtr0114494	Rpn13-RE	1495	0.802659	0.585274
FBgn0031495	GABPI	FBtr0344735	GABPI-RD	1450	0.801306	0.692916
FBgn0037715	CG9399	FBtr0334656	CG9399-RD	1017	0.801106	0.280079
FBgn0052581	CG32581	FBtr0074184	CG32581-RA	1428	0.800884	0.285479
FBgn0263102	psq	FBtr0088280	psq-RG	4513	0.800371	0.280079
FBgn0036999	isoQC	FBtr0078200	isoQC-RA	1975	0.800026	5.20562e-06
FBgn0029914	CG4558	FBtr0070995	CG4558-RA	2115	0.799792	0.376268
FBgn0264089	sli	FBtr0330733	sli-RE	8154	0.799676	0.692916
FBgn0016041	Tom40	FBtr0333748	Tom40-RC	2395	0.799178	5.20562e-06
FBgn0046222	Wdr33	FBtr0078714	Wdr33-RB	2785	0.796945	0.3968
FBgn0039757	RpS7	FBtr0089422	RpS7-RA	725	0.796761	5.20562e-06
FBgn0086690	Plp	FBtr0333944	Plp-RM	9225	0.796407	0.738593
FBgn0040071	tara	FBtr0083258	tara-RB	4066	0.796314	0.209592
FBgn0037120	CG11247	FBtr0078459	CG11247-RA	2803	0.79598	0.376268
FBgn0030803	CG4880	FBtr0310519	CG4880-RB	1505	0.79592	0.753969
FBgn0031834	CG13766	FBtr0079330	CG13766-RA	1819	0.795718	5.20562e-06
FBgn0028980	tant	FBtr0333390	tant-RB	1657	0.795704	0.34252
FBgn0026061	Mipp1	FBtr0075399	Mipp1-RA	1828	0.795628	0.562225
FBgn0035204	CG2277	FBtr0331867	CG2277-RB	2569	0.795159	0.538029
FBgn0052202	CG32202	FBtr0075051	CG32202-RA	616	0.79476	0.126065
FBgn0040070	Trx-2	FBtr0079840	Trx-2-RA	790	0.794599	5.20562e-06
FBgn0052039	CG32039	FBtr0345605	CG32039-RB	881	0.794125	0.832863
FBgn0013995	Calx	FBtr0344316	Calx-RH	5947	0.794057	0.889779
FBgn0027359	Tim8	FBtr0343640	Tim8-RB	761	0.793839	0.3968
FBgn0010398	Lrr47	FBtr0331671	Lrr47-RB	1874	0.793762	0.49271
FBgn0000384	cta	FBtr0111126	cta-RA	2156	0.793433	5.20562e-06
FBgn0040477	cid	FBtr0087667	cid-RA	1015	0.792934	5.20562e-06
FBgn0036196	CG11658	FBtr0076124	CG11658-RA	1984	0.792362	0.778551
FBgn0015298	Srp19	FBtr0076879	Srp19-RA	653	0.792072	5.20562e-06
FBgn0062413	Ctr1A	FBtr0308594	Ctr1A-RD	1503	0.791792	0.126065
FBgn0004921	Ggamma1	FBtr0088645	Ggamma1-RA	2554	0.791344	0.149336
FBgn0032052	PIG-U	FBtr0079682	PIG-U-RA	1478	0.791189	5.20562e-06
FBgn0030321	CG1703	FBtr0343647	CG1703-RB	3059	0.790006	0.923553
FBgn0038369	Arpc3A	FBtr0334594	Arpc3A-RE	1123	0.788981	0.229236
FBgn0039734	Tace	FBtr0085551	Tace-RA	2408	0.788852	0.538029
FBgn0011761	dhd	FBtr0070749	dhd-RA	772	0.788526	5.20562e-06
FBgn0032901	sky	FBtr0330257	sky-RL	4921	0.788444	0.611625
FBgn0025830	IntS8	FBtr0087036	IntS8-RA	3293	0.788063	5.20562e-06
FBgn0003371	sgg	FBtr0070468	sgg-RE	3055	0.788005	0.199262
FBgn0036331	CG14117	FBtr0332074	CG14117-RE	1053	0.787838	0.161869
FBgn0000546	EcR	FBtr0086010	EcR-RE	5233	0.787655	0.545053
FBgn0033990	CG10265	FBtr0087421	CG10265-RA	1230	0.787642	5.20562e-06
FBgn0052423	shep	FBtr0333288	shep-RH	7617	0.787491	0.65743
FBgn0004837	Su(H)	FBtr0080700	Su(H)-RA	2950	0.787405	5.20562e-06
FBgn0030724	Nipsnap	FBtr0074259	Nipsnap-RB	1361	0.786598	0.220584
FBgn0030744	CG9992	FBtr0074307	CG9992-RA	1594	0.786038	0.2168
FBgn0050022	CG30022	FBtr0289990	CG30022-RB	1356	0.786012	5.20562e-06
FBgn0283521	lola	FBtr0089359	lola-RT	2245	0.785784	0.721419
FBgn0032421	crok	FBtr0080342	crok-RA	1033	0.785633	5.20562e-06
FBgn0031195	CG17600	FBtr0077358	CG17600-RA	2470	0.78436	0.149336
FBgn0003559	su(f)	FBtr0306544	su(f)-RF	2909	0.784302	0.368863
FBgn0003517	sta	FBtr0339594	sta-RF	1088	0.784259	0.692916
FBgn0038099	CG7091	FBtr0300278	CG7091-RB	1880	0.783595	5.20562e-06
FBgn0028342	ATPsyndelta	FBtr0332896	ATPsyndelta-RB	978	0.783233	0.34252
FBgn0031772	CG13994	FBtr0343122	CG13994-RB	589	0.783093	0.594466
FBgn0086687	Desat1	FBtr0082630	Desat1-RD	1934	0.781848	5.20562e-06
FBgn0040339	MED22	FBtr0070165	MED22-RA	602	0.781819	5.20562e-06
FBgn0030529	Clic	FBtr0073835	Clic-RA	1839	0.781742	0.13639
FBgn0039358	CG5028	FBtr0113289	CG5028-RB	1934	0.78146	0.168237
FBgn0263987	spoon	FBtr0070795	spoon-RC	4509	0.78126	5.20562e-06
FBgn0003482	spn-D	FBtr0085116	spn-D-RA	1026	0.781255	0.13639
FBgn0025820	JTBR	FBtr0332876	JTBR-RB	789	0.780954	5.20562e-06
FBgn0027657	glob1	FBtr0083247	glob1-RA	1274	0.780524	5.20562e-06
FBgn0262511	Vha44	FBtr0087175	Vha44-RC	2693	0.779302	5.20562e-06
FBgn0036423	CG3919	FBtr0273239	CG3919-RB	1358	0.779204	0.188944
FBgn0263027	CG43322	FBtr0306926	CG43322-RA	1272	0.778996	5.20562e-06
FBgn0023527	CG3071	FBtr0070398	CG3071-RA	1921	0.778987	5.20562e-06
FBgn0031950	Herp	FBtr0343403	Herp-RC	2560	0.778654	0.316147
FBgn0001624	dlg1	FBtr0073492	dlg1-RJ	2102	0.778436	0.562225
FBgn0265177	CG44242	FBtr0339085	CG44242-RB	456	0.778362	5.20562e-06
FBgn0037138	P5CDh1	FBtr0332813	P5CDh1-RF	2823	0.778143	0.692916
FBgn0262527	nsl1	FBtr0301728	nsl1-RF	5877	0.777867	0.195081
FBgn0264979	CG4267	FBtr0077751	CG4267-RA	1322	0.777638	5.20562e-06
FBgn0036290	CG10638	FBtr0345350	CG10638-RD	1413	0.776479	0.457087
FBgn0264975	Nrg	FBtr0301763	Nrg-RE	7386	0.776085	0.509645
FBgn0039561	mfrn	FBtr0085266	mfrn-RA	3037	0.775925	5.20562e-06
FBgn0026879	CG13364	FBtr0070159	CG13364-RA	387	0.775906	5.20562e-06
FBgn0033979	Cyp6a19	FBtr0339984	Cyp6a19-RB	1903	0.774977	5.20562e-06
FBgn0261862	whd	FBtr0301281	whd-RC	2888	0.774607	0.376268
FBgn0031403	CG15387	FBtr0113015	CG15387-RB	693	0.77447	5.20562e-06
FBgn0038197	foxo	FBtr0346723	foxo-RH	3566	0.774	0.672985
FBgn0266449	Kr-h2	FBtr0343126	Kr-h2-RC	1491	0.773855	0.179692
FBgn0026084	cib	FBtr0070639	cib-RA	896	0.773389	5.20562e-06
FBgn0040080	pins	FBtr0085189	pins-RA	3279	0.773366	5.20562e-06
FBgn0023130	a6	FBtr0333116	a6-RC	2047	0.77324	0.762127
FBgn0267861	Maf1	FBtr0113829	Maf1-RA	1155	0.773089	5.20562e-06
FBgn0260747	Chchd2	FBtr0074387	Chchd2-RA	997	0.772702	5.20562e-06
FBgn0016041	Tom40	FBtr0071073	Tom40-RA	1676	0.772106	5.20562e-06
FBgn0053558	mim	FBtr0302034	mim-RC	7462	0.771907	0.672985
FBgn0015218	eIF4E1	FBtr0076487	eIF4E1-RB	1484	0.77166	0.2168
FBgn0015602	BEAF-32	FBtr0087441	BEAF-32-RA	1192	0.771495	0.13639
FBgn0014010	Rab5	FBtr0077793	Rab5-RB	1871	0.77108	0.524191
FBgn0031676	senju	FBtr0079009	senju-RA	1605	0.770582	5.20562e-06
FBgn0041087	wun2	FBtr0339380	wun2-RB	2211	0.770208	0.483314
FBgn0002781	mod(mdg4)	FBtr0084075	mod(mdg4)-RP	1855	0.770038	0.229236
FBgn0261934	dikar	FBtr0303750	dikar-RD	11586	0.769947	0.316147
FBgn0267378	sau	FBtr0077840	sau-RA	2395	0.769742	0.403819
FBgn0033813	fsd	FBtr0087742	fsd-RA	1020	0.768952	0.142102
FBgn0032374	CG14931	FBtr0300370	CG14931-RB	912	0.768771	0.126065
FBgn0031651	mRpL24	FBtr0079058	mRpL24-RA	875	0.768069	5.20562e-06
FBgn0029959	Rab39	FBtr0071072	Rab39-RA	1129	0.768039	0.426048
FBgn0000109	Aprt	FBtr0089420	Aprt-RA	797	0.767946	0.13639
FBgn0040005	CG17883	FBtr0334995	CG17883-RC	1619	0.767852	0.330013
FBgn0038659	EndoA	FBtr0334522	EndoA-RC	3913	0.767753	0.545053
FBgn0027548	nito	FBtr0088858	nito-RB	3115	0.767385	0.852888
FBgn0043010	Fsn	FBtr0087762	Fsn-RA	1287	0.766852	0.349361
FBgn0010431	mtrm	FBtr0076613	mtrm-RA	1092	0.766839	5.20562e-06
FBgn0004648	svr	FBtr0070085	svr-RE	3144	0.766437	0.170847
FBgn0030479	Rbp1-like	FBtr0339838	Rbp1-like-RC	1456	0.766163	0.126065
FBgn0260008	UQCR-11	FBtr0301784	UQCR-11-RC	434	0.766058	0.269895
FBgn0005655	PCNA	FBtr0086308	PCNA-RB	997	0.765837	0.176514
FBgn0259212	cno	FBtr0347363	cno-RJ	10585	0.765674	0.812666
FBgn0037883	CG14701	FBtr0082353	CG14701-RA	487	0.765498	0.142102
FBgn0037341	CG12746	FBtr0290215	CG12746-RE	1509	0.765108	0.316147
FBgn0263256	CG43394	FBtr0308298	CG43394-RA	2675	0.764967	0.483314
FBgn0032117	FucTB	FBtr0079811	FucTB-RA	1516	0.764526	0.747887
FBgn0037262	MED31	FBtr0078857	MED31-RB	823	0.763779	5.20562e-06
FBgn0243516	Vrp1	FBtr0302297	Vrp1-RJ	3888	0.763153	0.852888
FBgn0031992	Acbp1	FBtr0079640	Acbp1-RA	491	0.763149	0.149336
FBgn0035964	Dhpr	FBtr0076531	Dhpr-RA	1261	0.763038	0.538029
FBgn0036815	HipHop	FBtr0075056	HipHop-RA	1124	0.76262	5.20562e-06
FBgn0031738	CG9171	FBtr0301234	CG9171-RC	3090	0.762309	0.152707
FBgn0035321	CG1275	FBtr0072906	CG1275-RC	1300	0.76203	0.65743
FBgn0050147	Hil	FBtr0086255	Hil-RB	3383	0.762008	5.20562e-06
FBgn0036538	CG15715	FBtr0306854	CG15715-RB	969	0.762005	0.161869
FBgn0038490	CG5285	FBtr0083409	CG5285-RA	983	0.761881	0.152707
FBgn0004795	retn	FBtr0340029	retn-RC	4142	0.761755	0.457087
FBgn0261698	SLO2	FBtr0303080	SLO2-RD	6920	0.761507	0.457087
FBgn0051957	CG31957	FBtr0077514	CG31957-RA	676	0.760806	0.145538
FBgn0052576	CG32576	FBtr0100556	CG32576-RB	686	0.760571	5.20562e-06
FBgn0031657	CG3756	FBtr0078994	CG3756-RA	1153	0.760552	5.20562e-06
FBgn0259243	Pka-R1	FBtr0302643	Pka-R1-RAC	3243	0.760431	0.142102
FBgn0264747	CG44005	FBtr0334131	CG44005-RB	1406	0.760231	0.176514
FBgn0033529	CG17765	FBtr0088274	CG17765-RA	989	0.759729	0.126065
FBgn0015371	chn	FBtr0305216	chn-RH	5459	0.759585	0.562225
FBgn0261983	l(2)gd1	FBtr0306138	l(2)gd1-RB	3043	0.758408	0.296093
FBgn0015031	cype	FBtr0079072	cype-RA	396	0.758103	0.860178
FBgn0030060	CG2004	FBtr0071281	CG2004-RA	1659	0.757402	5.20562e-06
FBgn0036906	CG14102	FBtr0074928	CG14102-RA	2055	0.757391	5.20562e-06
FBgn0044047	Ilp6	FBtr0070406	Ilp6-RA	1908	0.757222	0.165641
FBgn0261243	Psa	FBtr0333395	Psa-RI	3665	0.756989	0.20663
FBgn0264357	SNF4Agamma	FBtr0301587	SNF4Agamma-RQ	3243	0.75693	0.785835
FBgn0023388	Dap160	FBtr0301276	Dap160-RC	3970	0.7569	0.666513
FBgn0038871	CG3337	FBtr0347217	CG3337-RB	2819	0.756646	0.330013
FBgn0031450	Hrs	FBtr0089751	Hrs-RC	2665	0.756356	0.672985
FBgn0020386	Pdk1	FBtr0072466	Pdk1-RH	4347	0.756288	0.545053
FBgn0033699	RpS11	FBtr0088007	RpS11-RC	738	0.75624	5.20562e-06
FBgn0034432	CG7461	FBtr0345425	CG7461-RC	2274	0.755985	0.27502
FBgn0032779	Alp12	FBtr0334164	Alp12-RD	2417	0.755814	0.457087
FBgn0010416	TH1	FBtr0074305	TH1-RA	2297	0.755093	0.13639
FBgn0039013	CG4813	FBtr0084326	CG4813-RA	1531	0.755004	0.179692
FBgn0032979	Clamp	FBtr0085964	Clamp-RA	2636	0.754996	5.20562e-06
FBgn0035675	CG6610	FBtr0077048	CG6610-RA	586	0.754711	0.27502
FBgn0042693	wrd	FBtr0290319	wrd-RK	3572	0.75468	0.896621
FBgn0038989	CG6937	FBtr0084266	CG6937-RA	1307	0.754393	5.20562e-06
FBgn0032197	CG5694	FBtr0079954	CG5694-RB	2388	0.754113	5.20562e-06
FBgn0010808	Chchd3	FBtr0085745	Chchd3-RA	940	0.753494	5.20562e-06
FBgn0030813	CG4949	FBtr0343333	CG4949-RC	2339	0.753193	0.770355
FBgn0038388	CG4287	FBtr0301716	CG4287-RB	1644	0.752683	0.303186
FBgn0266178	pre-mod(mdg4)-B	FBtr0343756	pre-mod(mdg4)-B-RA	3612	0.75216	0.957411
FBgn0029174	Fkbp59	FBtr0342837	Fkbp59-RB	1587	0.751994	0.8265
FBgn0259178	5PtaseI	FBtr0299661	5PtaseI-RC	2864	0.751985	0.165641
FBgn0058439	CG40439	FBtr0111233	CG40439-RB	688	0.751765	0.161869
FBgn0032732	CG15168	FBtr0081135	CG15168-RA	492	0.750562	0.13639
FBgn0037008	mTerf3	FBtr0078215	mTerf3-RA	1124	0.750556	5.20562e-06
FBgn0000108	Appl	FBtr0070109	Appl-RA	5422	0.750283	0.585274
FBgn0038039	CG5196	FBtr0082584	CG5196-RA	1679	0.749506	5.20562e-06
FBgn0034763	RYBP	FBtr0071868	RYBP-RA	2064	0.749472	5.20562e-06
FBgn0002778	mnd	FBtr0075627	mnd-RA	2491	0.748855	0.524191
FBgn0031183	CG14621	FBtr0339558	CG14621-RC	1461	0.7486	0.878965
FBgn0051360	CG31360	FBtr0083480	CG31360-RA	649	0.748191	5.20562e-06
FBgn0000286	Cf2	FBtr0089647	Cf2-RC	3703	0.74744	0.220584
FBgn0020618	Rack1	FBtr0331238	Rack1-RC	1388	0.747234	0.501434
FBgn0039678	Obp99a	FBtr0339147	Obp99a-RB	561	0.747186	0.296093
FBgn0285947	RpS10b	FBtr0074732	RpS10b-RC	1469	0.747115	0.149336
FBgn0285917	sbb	FBtr0301550	sbb-RG	9824	0.747007	0.578465
FBgn0037297	CG1116	FBtr0334907	CG1116-RD	1639	0.746891	0.145538
FBgn0036336	ste14	FBtr0075876	ste14-RA	1227	0.746408	0.20663
FBgn0020386	Pdk1	FBtr0072470	Pdk1-RB	3300	0.746308	0.220584
FBgn0024330	MED6	FBtr0339719	MED6-RE	1617	0.746284	5.20562e-06
FBgn0264291	Det	FBtr0083408	Det-RA	651	0.745999	5.20562e-06
FBgn0030052	CG12065	FBtr0071216	CG12065-RC	2655	0.745969	0.538029
FBgn0039407	CG14544	FBtr0084969	CG14544-RA	1069	0.745945	0.126065
FBgn0037838	TTLL15	FBtr0082281	TTLL15-RA	2022	0.745741	0.126065
FBgn0010520	Bka	FBtr0079874	Bka-RA	758	0.745242	5.20562e-06
FBgn0001099	gdl	FBtr0346516	gdl-RC	1022	0.744509	0.156184
FBgn0034921	DCP1	FBtr0072223	DCP1-RA	1513	0.744239	5.20562e-06
FBgn0035772	Sh3beta	FBtr0302546	Sh3beta-RC	1272	0.743952	0.538029
FBgn0038683	CG11779	FBtr0335020	CG11779-RE	2474	0.743915	5.20562e-06
FBgn0052549	CG32549	FBtr0074575	CG32549-RF	2652	0.743851	0.174106
FBgn0038047	CG5245	FBtr0082589	CG5245-RA	1623	0.743538	0.126065
FBgn0053303	CG33303	FBtr0332197	CG33303-RB	2333	0.743533	0.280079
FBgn0085339	CG34310	FBtr0112506	CG34310-RA	706	0.743508	0.168237
FBgn0039459	IntS12	FBtr0085061	IntS12-RA	1184	0.743312	5.20562e-06
FBgn0028425	JhI-21	FBtr0089656	JhI-21-RB	2089	0.742448	0.642079
FBgn0016053	pgc	FBtr0112519	pgc-RC	686	0.742236	0.152707
FBgn0003654	sw	FBtr0089402	sw-RF	2910	0.74194	0.516353
FBgn0030039	CG12123	FBtr0071245	CG12123-RA	1044	0.741902	5.20562e-06
FBgn0038638	CG7702	FBtr0083664	CG7702-RA	2404	0.741829	0.731002
FBgn0000384	cta	FBtr0334157	cta-RB	2764	0.741555	0.188944
FBgn0264672	Eogt	FBtr0077767	Eogt-RA	1869	0.741526	0.39016
FBgn0031529	CG9662	FBtr0332407	CG9662-RB	846	0.741143	5.20562e-06
FBgn0086445	l(2)37Cd	FBtr0081156	l(2)37Cd-RA	1821	0.741122	5.20562e-06
FBgn0052103	CG32103	FBtr0075982	CG32103-RB	2622	0.74082	0.316147
FBgn0031357	mRpL48	FBtr0333542	mRpL48-RB	690	0.740566	0.126065
FBgn0036967	SCCRO4	FBtr0332775	SCCRO4-RD	1427	0.740065	0.303186
FBgn0027594	drpr	FBtr0072798	drpr-RA	3206	0.739847	0.538029
FBgn0003312	sad	FBtr0082475	sad-RA	1773	0.739282	0.158791
FBgn0000239	bur	FBtr0343875	bur-RC	3116	0.739262	0.269895
FBgn0037885	CG17721	FBtr0304707	CG17721-RB	601	0.739024	0.158791
FBgn0259214	PMCA	FBtr0300556	PMCA-RK	4066	0.738972	0.903562
FBgn0005278	Sam-S	FBtr0089433	Sam-S-RF	2353	0.738772	5.20562e-06
FBgn0026428	HDAC6	FBtr0307384	HDAC6-RF	3272	0.737837	0.570134
FBgn0026441	ear	FBtr0334695	ear-RC	3988	0.737457	0.419084
FBgn0039714	Zip99C	FBtr0303033	Zip99C-RI	1709	0.737184	0.524191
FBgn0035520	CG11586	FBtr0073243	CG11586-RA	1115	0.736829	0.3968
FBgn0036173	CG7394	FBtr0290024	CG7394-RB	890	0.73572	0.18537
FBgn0053303	CG33303	FBtr0080052	CG33303-RA	1516	0.73514	5.20562e-06
FBgn0002626	RpL32	FBtr0085593	RpL32-RC	747	0.734866	0.846922
FBgn0037614	TMEM216	FBtr0300544	TMEM216-RC	1826	0.734819	0.142102
FBgn0003028	ovo	FBtr0070738	ovo-RB	6606	0.734759	0.762127
FBgn0042132	CG18809	FBtr0074810	CG18809-RA	2019	0.73436	0.819738
FBgn0033902	eIF3m	FBtr0339964	eIF3m-RB	1386	0.734222	5.20562e-06
FBgn0042693	wrd	FBtr0083552	wrd-RD	2321	0.734085	0.426048
FBgn0037070	CG11309	FBtr0078407	CG11309-RA	1664	0.73372	0.2168
FBgn0016119	ATPsynCF6	FBtr0305982	ATPsynCF6-RB	616	0.733462	0.885055
FBgn0033995	GPHR	FBtr0087404	GPHR-RA	1780	0.733128	5.20562e-06
FBgn0031319	CG4896	FBtr0344790	CG4896-RK	3193	0.733094	0.524191
FBgn0260959	MCPH1	FBtr0301431	MCPH1-RD	3360	0.73293	5.20562e-06
FBgn0053977	CG33977	FBtr0100020	CG33977-RA	425	0.732919	0.126065
FBgn0086674	Tango13	FBtr0310433	Tango13-RE	6036	0.732466	0.634122
FBgn0036820	Grx1	FBtr0075063	Grx1-RA	595	0.732431	0.188944
FBgn0052425	CG32425	FBtr0078202	CG32425-RC	2077	0.732304	5.20562e-06
FBgn0263391	hts	FBtr0309104	hts-RA	4163	0.732078	0.158791
FBgn0046214	vig2	FBtr0084776	vig2-RC	1701	0.7318	5.20562e-06
FBgn0003302	rux	FBtr0307288	rux-RB	1319	0.730467	0.145538
FBgn0052062	Rbfox1	FBtr0113418	Rbfox1-RE	3508	0.73033	0.545053
FBgn0267972	Der-1	FBtr0077813	Der-1-RA	1088	0.730214	5.20562e-06
FBgn0001087	g	FBtr0331710	g-RF	3993	0.730164	0.712714
FBgn0037705	mura	FBtr0082118	mura-RC	4671	0.730011	0.3968
FBgn0001078	ftz-f1	FBtr0347045	ftz-f1-RD	6060	0.72958	0.545053
FBgn0030724	Nipsnap	FBtr0343595	Nipsnap-RF	1377	0.727919	0.465757
FBgn0039938	Sox102F	FBtr0100600	Sox102F-RB	3804	0.727821	0.330013
FBgn0052856	CG32856	FBtr0083239	CG32856-RA	563	0.727563	0.578465
FBgn0035473	mge	FBtr0073176	mge-RA	1088	0.727548	5.20562e-06
FBgn0052452	CG32452	FBtr0345591	CG32452-RC	2130	0.726694	0.170847
FBgn0030700	CG15914	FBtr0074105	CG15914-RA	1422	0.726603	5.20562e-06
FBgn0032480	Edem2	FBtr0333235	Edem2-RB	4058	0.726572	0.554553
FBgn0030038	CG1440	FBtr0339438	CG1440-RD	2394	0.726224	0.170847
FBgn0030328	Amun	FBtr0303336	Amun-RF	2704	0.726134	0.942414
FBgn0029860	CG15891	FBtr0100319	CG15891-RA	599	0.726021	5.20562e-06
FBgn0029133	REG	FBtr0310646	REG-RB	1830	0.725727	0.426048
FBgn0034304	CG5742	FBtr0329999	CG5742-RB	3060	0.725304	0.179692
FBgn0040324	Ephrin	FBtr0089077	Ephrin-RC	5312	0.72466	0.202688
FBgn0039116	CG10375	FBtr0300681	CG10375-RB	938	0.724502	0.349361
FBgn0041342	Pcyt1	FBtr0345365	Pcyt1-RF	2754	0.724407	0.753969
FBgn0040780	Atg10	FBtr0113331	Atg10-RB	1200	0.72398	0.126065
FBgn0039942	CG17163	FBtr0309316	CG17163-RB	1451	0.7238	5.20562e-06
FBgn0034982	Naa35	FBtr0072280	Naa35-RA	2539	0.723732	0.126065
FBgn0263199	Galk	FBtr0076554	Galk-RB	2053	0.723692	0.291361
FBgn0045823	vsg	FBtr0076400	vsg-RD	2273	0.72356	0.8724
FBgn0053229	CG33229	FBtr0072499	CG33229-RA	1500	0.723358	5.20562e-06
FBgn0025549	unc-119	FBtr0346619	unc-119-RC	2340	0.721711	0.309732
FBgn0050382	CG30382	FBtr0088894	CG30382-RA	952	0.721603	5.20562e-06
FBgn0040984	CG4440	FBtr0080835	CG4440-RA	384	0.721278	0.165641
FBgn0027343	fz3	FBtr0345511	fz3-RC	3250	0.721134	0.34252
FBgn0038312	Zip88E	FBtr0290018	Zip88E-RB	1539	0.720567	0.149336
FBgn0259978	vlc	FBtr0307532	vlc-RI	2425	0.719858	0.316147
FBgn0028982	Spt6	FBtr0070896	Spt6-RA	6166	0.719829	0.516353
FBgn0033897	Rcd1	FBtr0310669	Rcd1-RE	3864	0.719478	0.812666
FBgn0259482	Mob3	FBtr0079983	Mob3-RA	912	0.719121	0.152707
FBgn0033085	CG15908	FBtr0086114	CG15908-RA	537	0.718337	0.168237
FBgn0033948	CG12863	FBtr0087500	CG12863-RA	1417	0.71756	5.20562e-06
FBgn0020386	Pdk1	FBtr0072465	Pdk1-RA	3986	0.717546	0.145538
FBgn0039249	CG11168	FBtr0337010	CG11168-RE	2903	0.717249	0.65743
FBgn0005671	Vha55	FBtr0082670	Vha55-RB	2722	0.716652	5.20562e-06
FBgn0037244	CG14647	FBtr0290222	CG14647-RB	1178	0.71621	5.20562e-06
FBgn0035166	JMJD5	FBtr0331402	JMJD5-RC	1309	0.716017	0.531116
FBgn0035995	CG3529	FBtr0331582	CG3529-RC	2069	0.715791	0.703402
FBgn0037890	CG17734	FBtr0082360	CG17734-RA	764	0.715455	5.20562e-06
FBgn0283659	THG	FBtr0080727	THG-RA	1149	0.715248	0.403819
FBgn0285970	CG32500	FBtr0077374	CG32500-RA	1084	0.715243	0.957411
FBgn0038307	mRpS10	FBtr0083053	mRpS10-RA	723	0.714877	5.20562e-06
FBgn0030196	Psf3	FBtr0333306	Psf3-RB	1668	0.714639	0.13639
FBgn0085453	Mthfs	FBtr0112725	Mthfs-RA	915	0.714419	0.233605
FBgn0035397	CG11486	FBtr0073002	CG11486-RF	3228	0.714114	0.457087
FBgn0000055	Adh	FBtr0100589	Adh-RC	1057	0.713886	5.20562e-06
FBgn0259985	Mppe	FBtr0339583	Mppe-RE	1790	0.713593	0.967399
FBgn0039969	Fis1	FBtr0086073	Fis1-RA	630	0.713585	0.672985
FBgn0037779	CG12811	FBtr0082204	CG12811-RA	1002	0.713072	5.20562e-06
FBgn0029594	CG14806	FBtr0331384	CG14806-RB	770	0.712869	5.20562e-06
FBgn0030239	CG17333	FBtr0073379	CG17333-RA	847	0.712839	5.20562e-06
FBgn0002781	mod(mdg4)	FBtr0114361	mod(mdg4)-RAC	1799	0.712084	0.224858
FBgn0003371	sgg	FBtr0070469	sgg-RF	4244	0.712028	0.531116
FBgn0031069	Pmp70	FBtr0074795	Pmp70-RA	2975	0.711583	5.20562e-06
FBgn0004054	zen2	FBtr0290296	zen2-RB	940	0.71145	0.349361
FBgn0035753	RpL18	FBtr0076892	RpL18-RA	724	0.711308	0.18537
FBgn0030092	fh	FBtr0071348	fh-RA	923	0.70998	5.20562e-06
FBgn0038570	Prx5	FBtr0100619	Prx5-RA	1449	0.70957	0.411308
FBgn0015903	apt	FBtr0072069	apt-RC	2783	0.709271	0.382835
FBgn0013750	Arf51F	FBtr0087375	Arf51F-RD	1939	0.708974	0.192125
FBgn0029905	Nf-YC	FBtr0070974	Nf-YC-RA	2522	0.708892	5.20562e-06
FBgn0263398	Uck	FBtr0309095	Uck-RC	1837	0.70875	0.703402
FBgn0063485	Lasp	FBtr0075350	Lasp-RA	2793	0.708633	0.126065
FBgn0261823	Asx	FBtr0100154	Asx-RB	5062	0.708026	0.896621
FBgn0000063	Mps1	FBtr0083478	Mps1-RA	2113	0.707153	5.20562e-06
FBgn0024889	Kap-alpha1	FBtr0074881	Kap-alpha1-RA	2322	0.707133	5.20562e-06
FBgn0033177	CG11141	FBtr0088999	CG11141-RA	2497	0.706967	5.20562e-06
FBgn0267347	squ	FBtr0080887	squ-RA	1372	0.70695	0.176514
FBgn0002735	E(spl)mgamma-HLH	FBtr0084955	E(spl)mgamma-HLH-RA	911	0.706768	0.20663
FBgn0035356	CG16986	FBtr0302434	CG16986-RB	694	0.706641	0.168237
FBgn0086855	CG17078	FBtr0330650	CG17078-RE	3132	0.706494	0.291361
FBgn0000370	crc	FBtr0332001	crc-RE	2244	0.706477	0.34252
FBgn0001124	Got1	FBtr0087232	Got1-RA	1683	0.706471	5.20562e-06
FBgn0039358	CG5028	FBtr0113291	CG5028-RD	1742	0.706349	0.650595
FBgn0040513	kappaB-Ras	FBtr0089002	kappaB-Ras-RA	1905	0.706321	0.465757
FBgn0037525	CG17816	FBtr0113203	CG17816-RG	3190	0.706108	0.692916
FBgn0031115	CG11710	FBtr0089643	CG11710-RA	1766	0.706061	0.296093
FBgn0264895	RapGAP1	FBtr0334850	RapGAP1-RI	4462	0.705794	0.770355
FBgn0261545	CG42663	FBtr0302645	CG42663-RB	4068	0.705017	0.554553
FBgn0265174	PIG-V	FBtr0339072	PIG-V-RB	1851	0.70483	0.291361
FBgn0087002	apolpp	FBtr0345297	apolpp-RD	10412	0.704592	0.846922
FBgn0039944	CG17162	FBtr0300041	CG17162-RF	3431	0.703939	0.650595
FBgn0038251	Hexim	FBtr0082967	Hexim-RA	1515	0.703513	5.20562e-06
FBgn0039642	CG11882	FBtr0085411	CG11882-RA	1087	0.703499	5.20562e-06
FBgn0033551	CG7222	FBtr0088223	CG7222-RA	1523	0.703324	0.202688
FBgn0035209	msd1	FBtr0072678	msd1-RA	528	0.703204	5.20562e-06
FBgn0034849	CG3500	FBtr0329860	CG3500-RB	774	0.702687	0.13639
FBgn0030605	ND-B18	FBtr0340424	ND-B18-RB	943	0.702366	0.263159
FBgn0033799	GLaz	FBtr0310153	GLaz-RD	1023	0.702092	0.483314
FBgn0035713	velo	FBtr0345025	velo-RD	2490	0.70201	5.20562e-06
FBgn0002973	numb	FBtr0079821	numb-RB	2956	0.701886	5.20562e-06
FBgn0020545	kraken	FBtr0334794	kraken-RB	1240	0.70175	0.126065
FBgn0035283	CG12024	FBtr0303152	CG12024-RC	1777	0.70159	0.142102
FBgn0051363	Jupiter	FBtr0082452	Jupiter-RD	1517	0.701503	5.20562e-06
FBgn0003495	spz	FBtr0114372	spz-RL	2058	0.701415	0.516353
FBgn0034345	CG5174	FBtr0086687	CG5174-RH	1472	0.701375	0.263159
FBgn0250823	gish	FBtr0083263	gish-RA	2677	0.700588	0.233605
FBgn0025638	Roc1a	FBtr0343564	Roc1a-RD	1145	0.700559	0.3968
FBgn0037312	CG11999	FBtr0078807	CG11999-RA	904	0.700528	5.20562e-06
FBgn0051357	CG31357	FBtr0084735	CG31357-RA	1681	0.70041	5.20562e-06
FBgn0014857	His3.3A	FBtr0333537	His3.3A-RD	772	0.699614	0.220584
FBgn0034963	Not11	FBtr0343345	Not11-RC	1022	0.699263	0.501434
FBgn0004656	fs(1)h	FBtr0071118	fs(1)h-RA	9146	0.699046	0.509645
FBgn0004855	RpII15	FBtr0346348	RpII15-RC	1035	0.698837	0.20663
FBgn0032077	CG9515	FBtr0340262	CG9515-RB	1029	0.697913	0.291361
FBgn0036152	CG6175	FBtr0076183	CG6175-RB	2792	0.697618	0.34252
FBgn0033737	Nup54	FBtr0087952	Nup54-RA	2048	0.697443	5.20562e-06
FBgn0031711	CG6907	FBtr0343257	CG6907-RB	1512	0.696691	5.20562e-06
FBgn0283536	Vha13	FBtr0083804	Vha13-RA	703	0.696538	5.20562e-06
FBgn0030791	CG9132	FBtr0074353	CG9132-RA	2545	0.696439	0.426048
FBgn0035475	CG10866	FBtr0073173	CG10866-RA	1337	0.696222	5.20562e-06
FBgn0016078	wun	FBtr0088553	wun-RA	1626	0.696161	0.2168
FBgn0034172	CG6665	FBtr0087054	CG6665-RC	1395	0.695147	0.13639
FBgn0262518	Rab8	FBtr0074921	Rab8-RA	2263	0.695048	0.570134
FBgn0033809	CG4630	FBtr0087765	CG4630-RA	2121	0.695004	0.501434
FBgn0033457	Ntmt	FBtr0472834	Ntmt-RB	1420	0.69474	0.531116
FBgn0061198	HSPC300	FBtr0343346	HSPC300-RB	584	0.694648	0.174106
FBgn0033504	CAP	FBtr0088346	CAP-RE	1788	0.694485	0.666513
FBgn0000274	Pka-C2	FBtr0085727	Pka-C2-RB	1349	0.69435	0.449308
FBgn0036405	CG6833	FBtr0075774	CG6833-RA	1264	0.693854	5.20562e-06
FBgn0024432	Dlc90F	FBtr0083575	Dlc90F-RA	816	0.693683	5.20562e-06
FBgn0035772	Sh3beta	FBtr0076873	Sh3beta-RB	1515	0.693334	0.501434
FBgn0033208	mRpL52	FBtr0088942	mRpL52-RA	558	0.693017	0.126065
FBgn0031068	Alr	FBtr0074794	Alr-RA	1107	0.692647	5.20562e-06
FBgn0032222	CG5037	FBtr0079992	CG5037-RA	1473	0.692547	5.20562e-06
FBgn0031117	GstT3	FBtr0340044	GstT3-RC	1369	0.692382	0.634122
FBgn0029878	Pat1	FBtr0070945	Pat1-RA	3716	0.691795	0.152707
FBgn0036927	Gabat	FBtr0344085	Gabat-RD	1667	0.691217	0.192125
FBgn0039272	CG11836	FBtr0113284	CG11836-RC	1127	0.690884	0.936544
FBgn0015791	Rab14	FBtr0080627	Rab14-RB	1468	0.690704	5.20562e-06
FBgn0030096	Zpr1	FBtr0071342	Zpr1-RA	1853	0.690465	5.20562e-06
FBgn0051855	CG31855	FBtr0290000	CG31855-RB	1126	0.689873	0.626966
FBgn0034951	CG3860	FBtr0343288	CG3860-RB	2113	0.689785	0.8724
FBgn0035529	Fdx2	FBtr0300775	Fdx2-RB	863	0.689749	5.20562e-06
FBgn0058002	ND-AGGG	FBtr0113773	ND-AGGG-RA	745	0.688264	5.20562e-06
FBgn0031980	RpL36A	FBtr0345332	RpL36A-RB	514	0.687809	0.578465
FBgn0031768	CG12393	FBtr0343120	CG12393-RD	1213	0.686562	5.20562e-06
FBgn0000286	Cf2	FBtr0304887	Cf2-RE	4231	0.686313	0.2168
FBgn0264075	tgo	FBtr0082005	tgo-RA	3108	0.685325	0.27502
FBgn0261456	hpo	FBtr0331920	hpo-RB	2804	0.685127	0.142102
FBgn0010551	Phb2	FBtr0112862	Phb2-RE	1237	0.684242	0.126065
FBgn0030657	cerv	FBtr0346182	cerv-RD	1141	0.684099	0.578465
FBgn0030628	CG9114	FBtr0074020	CG9114-RA	2315	0.684095	5.20562e-06
FBgn0285947	RpS10b	FBtr0074731	RpS10b-RB	743	0.683667	5.20562e-06
FBgn0037182	ArfGAP3	FBtr0078539	ArfGAP3-RA	2689	0.683054	0.475788
FBgn0031231	mRpL10	FBtr0078124	mRpL10-RA	903	0.683039	5.20562e-06
FBgn0033391	CG8026	FBtr0302512	CG8026-RD	1941	0.682639	5.20562e-06
FBgn0022984	qkr58E-3	FBtr0290254	qkr58E-3-RB	1433	0.682427	0.336441
FBgn0016131	Cdk4	FBtr0087103	Cdk4-RA	1801	0.682422	0.465757
FBgn0037200	CG11109	FBtr0078552	CG11109-RB	1415	0.682237	5.20562e-06
FBgn0243513	cnir	FBtr0077666	cnir-RA	871	0.682148	0.142102
FBgn0005694	Aef1	FBtr0078349	Aef1-RC	2622	0.682147	0.34252
FBgn0037719	bocks	FBtr0100537	bocks-RB	1535	0.682139	5.20562e-06
FBgn0043001	Chrac-16	FBtr0073642	Chrac-16-RA	685	0.681908	0.246243
FBgn0264491	how	FBtr0100514	how-RC	2181	0.681864	0.382835
FBgn0003683	term	FBtr0075112	term-RA	1469	0.681753	0.770355
FBgn0267976	Tim23	FBtr0113781	Tim23-RA	893	0.681614	5.20562e-06
FBgn0036824	CG3902	FBtr0075076	CG3902-RA	1585	0.681391	5.20562e-06
FBgn0015756	RpL9	FBtr0080164	RpL9-RB	798	0.681363	0.240862
FBgn0011705	rost	FBtr0079782	rost-RA	1378	0.681135	5.20562e-06
FBgn0031126	Cyp6v1	FBtr0345967	Cyp6v1-RC	2528	0.680977	0.156184
FBgn0000370	crc	FBtr0332002	crc-RF	1878	0.680941	0.411308
FBgn0051550	CG31550	FBtr0078684	CG31550-RB	2691	0.680836	0.852888
FBgn0039668	Trc8	FBtr0085432	Trc8-RD	3471	0.680814	0.256896
FBgn0032030	Wdr82	FBtr0079650	Wdr82-RA	1089	0.680759	5.20562e-06
FBgn0032147	IP3K1	FBtr0079869	IP3K1-RA	2055	0.68042	0.181317
FBgn0035854	CG8005	FBtr0332137	CG8005-RB	1216	0.680021	0.642079
FBgn0036728	UQCR-Q	FBtr0333691	UQCR-Q-RD	425	0.679973	0.747887
FBgn0036240	CG6928	FBtr0332710	CG6928-RD	2432	0.678787	0.149336
FBgn0037614	TMEM216	FBtr0081905	TMEM216-RA	1831	0.678155	5.20562e-06
FBgn0034210	Camp	FBtr0086964	Camp-RA	1813	0.677571	0.220584
FBgn0051460	CG31460	FBtr0339327	CG31460-RB	717	0.677347	0.721419
FBgn0015320	Ubc2	FBtr0080115	Ubc2-RA	1558	0.677317	0.13639
FBgn0037020	Pex14	FBtr0078251	Pex14-RA	1249	0.676569	5.20562e-06
FBgn0026257	cav	FBtr0084557	cav-RD	1649	0.676522	0.419084
FBgn0283438	CG46280	FBtr0445183	CG46280-RB	2806	0.676518	0.65743
FBgn0027083	MetRS-m	FBtr0082895	MetRS-m-RA	1862	0.676272	0.554553
FBgn0264357	SNF4Agamma	FBtr0084022	SNF4Agamma-RE	3308	0.676084	0.672985
FBgn0031633	Fnta	FBtr0336961	Fnta-RB	1352	0.675711	0.819738
FBgn0260858	Ykt6	FBtr0071093	Ykt6-RA	1469	0.6756	0.176514
FBgn0260439	Pp2A-29B	FBtr0339789	Pp2A-29B-RE	2757	0.675178	0.475788
FBgn0040467	Dlip1	FBtr0071302	Dlip1-RA	691	0.675114	0.176514
FBgn0025615	Torsin	FBtr0070690	Torsin-RA	1184	0.674341	5.20562e-06
FBgn0086355	Tpi	FBtr0085583	Tpi-RB	1112	0.673757	5.20562e-06
FBgn0266674	Sec15	FBtr0084034	Sec15-RA	2799	0.673691	5.20562e-06
FBgn0010039	GstD3	FBtr0082570	GstD3-RA	746	0.673551	0.156184
FBgn0030790	CG4768	FBtr0305899	CG4768-RB	2683	0.673538	0.2168
FBgn0260861	Trs23	FBtr0079730	Trs23-RA	765	0.673323	0.126065
FBgn0286213	RpS12	FBtr0075878	RpS12-RB	613	0.672581	5.20562e-06
FBgn0038387	blp	FBtr0345214	blp-RB	964	0.672562	0.626966
FBgn0032032	CG17294	FBtr0079651	CG17294-RA	1012	0.672062	5.20562e-06
FBgn0030960	Atg101	FBtr0074635	Atg101-RA	1850	0.67178	5.20562e-06
FBgn0038984	AdipoR	FBtr0084282	AdipoR-RA	2299	0.671468	0.285479
FBgn0039889	Arl4	FBtr0333677	Arl4-RC	958	0.671143	0.2168
FBgn0038401	CG5916	FBtr0083251	CG5916-RA	2146	0.670566	0.376268
FBgn0042083	Mccc2	FBtr0086126	Mccc2-RA	2141	0.670352	5.20562e-06
FBgn0032477	CG5287	FBtr0080436	CG5287-RA	1557	0.670277	5.20562e-06
FBgn0053523	CG33523	FBtr0091478	CG33523-RA	1508	0.670181	0.170847
FBgn0259481	Mob2	FBtr0089333	Mob2-RB	3466	0.670079	0.524191
FBgn0037121	Rpb8	FBtr0078432	Rpb8-RA	692	0.670049	5.20562e-06
FBgn0053129	CG33129	FBtr0080171	CG33129-RB	1533	0.669983	0.8265
FBgn0010762	simj	FBtr0331574	simj-RE	5110	0.669929	0.152707
FBgn0267821	da	FBtr0332195	da-RB	3603	0.669894	0.152707
FBgn0004903	Rb97D	FBtr0100336	Rb97D-RE	2510	0.669609	0.419084
FBgn0036921	RhoGDI	FBtr0331800	RhoGDI-RB	1442	0.669378	0.192125
FBgn0010433	ato	FBtr0081828	ato-RA	1223	0.669028	0.538029
FBgn0038608	WRNexo	FBtr0083586	WRNexo-RA	1495	0.668967	5.20562e-06
FBgn0032377	CG14937	FBtr0080264	CG14937-RA	1596	0.668861	0.195081
FBgn0032596	Prosbeta4	FBtr0335142	Prosbeta4-RB	815	0.668797	0.20663
FBgn0037770	Art4	FBtr0333687	Art4-RB	3071	0.668759	0.449308
FBgn0030817	CG4991	FBtr0074384	CG4991-RB	2087	0.668675	0.382835
FBgn0261573	CoRest	FBtr0302864	CoRest-RF	3296	0.668401	0.126065
FBgn0026076	UBL3	FBtr0300787	UBL3-RC	2160	0.668356	0.156184
FBgn0040763	CG18336	FBtr0088175	CG18336-RA	750	0.668262	0.179692
FBgn0000455	Dip-C	FBtr0344982	Dip-C-RB	1951	0.668137	0.86713
FBgn0030060	CG2004	FBtr0346167	CG2004-RG	1920	0.667224	0.692916
FBgn0038828	CG17270	FBtr0083994	CG17270-RA	1362	0.666861	0.362239
FBgn0028746	CG18508	FBtr0070543	CG18508-RA	630	0.666653	0.145538
FBgn0037617	nom	FBtr0337073	nom-RB	1553	0.666625	0.832863
FBgn0034141	CG8311	FBtr0087121	CG8311-RA	1897	0.666596	5.20562e-06
FBgn0034804	CG3831	FBtr0071993	CG3831-RA	1562	0.666261	5.20562e-06
FBgn0263398	Uck	FBtr0309097	Uck-RE	2187	0.666246	0.465757
FBgn0002638	Rcc1	FBtr0077076	Rcc1-RC	2085	0.666045	0.619158
FBgn0001174	halo	FBtr0114554	halo-RB	616	0.666007	0.538029
FBgn0034008	CG8152	FBtr0087392	CG8152-RA	1204	0.665939	5.20562e-06
FBgn0262624	Tmhs	FBtr0072836	Tmhs-RB	1413	0.665847	0.531116
[truncated: 11,008 more rows]

## Sheet: Significantly Enriched 1.5 fold
FBgn_ID	gene_ID	FBtr_ID	Trx_name	Length	log2FC	qvalue
FBgn0001142	Gs1	FBtr0300568	Gs1-RD	1699	8.27559	5.20562e-06
FBgn0283521	lola	FBtr0089347	lola-RG	4267	6.42515	5.20562e-06
FBgn0010313	corto	FBtr0345141	corto-RE	2992	5.88893	5.20562e-06
FBgn0004648	svr	FBtr0344737	svr-RL	2851	5.72468	5.20562e-06
FBgn0265605	Ric	FBtr0300576	Ric-RB	2046	5.70155	5.20562e-06
FBgn0051163	SKIP	FBtr0305036	SKIP-RF	6584	5.34009	5.20562e-06
FBgn0003165	pum	FBtr0081991	pum-RD	6659	5.2869	5.20562e-06
FBgn0052479	Usp10	FBtr0072589	Usp10-RA	6346	5.19436	5.20562e-06
FBgn0003165	pum	FBtr0081990	pum-RA	6661	4.79369	5.20562e-06
FBgn0037720	CG8312	FBtr0334617	CG8312-RD	3414	4.77022	5.20562e-06
FBgn0052479	Usp10	FBtr0333267	Usp10-RC	7873	4.71432	5.20562e-06
FBgn0038872	Nelf-A	FBtr0339192	Nelf-A-RC	4645	4.70403	5.20562e-06
FBgn0039830	ATPsynC	FBtr0306237	ATPsynC-RG	722	4.69955	5.20562e-06
FBgn0003165	pum	FBtr0081993	pum-RB	7473	4.69035	5.20562e-06
FBgn0003165	pum	FBtr0081994	pum-RE	4685	4.68015	5.20562e-06
FBgn0052640	CG32640	FBtr0073728	CG32640-RA	466	4.61758	5.20562e-06
FBgn0003165	pum	FBtr0081992	pum-RC	6809	4.04396	5.20562e-06
FBgn0011225	jar	FBtr0301370	jar-RJ	4279	4.01311	5.20562e-06
FBgn0030753	rngo	FBtr0074278	rngo-RA	2186	3.89853	5.20562e-06
FBgn0005278	Sam-S	FBtr0089435	Sam-S-RJ	2309	3.74499	5.20562e-06
FBgn0267376	SelR	FBtr0306641	SelR-RJ	2392	3.60355	5.20562e-06
FBgn0031077	THADA	FBtr0308650	THADA-RC	5361	3.25942	5.20562e-06
FBgn0261269	conv	FBtr0339967	conv-RB	3645	2.98641	5.20562e-06
FBgn0038197	foxo	FBtr0082887	foxo-RC	3548	2.97911	5.20562e-06
FBgn0036581	MED10	FBtr0333560	MED10-RC	638	2.96344	5.20562e-06
FBgn0027343	fz3	FBtr0070138	fz3-RA	2249	2.95365	5.20562e-06
FBgn0031275	GABA-B-R3	FBtr0078001	GABA-B-R3-RA	5466	2.88637	5.20562e-06
FBgn0028979	tio	FBtr0089377	tio-RA	5594	2.88529	5.20562e-06
FBgn0038828	CG17270	FBtr0334723	CG17270-RB	1034	2.7756	5.20562e-06
FBgn0003430	slp1	FBtr0077499	slp1-RA	1425	2.73227	5.20562e-06
FBgn0037110	ORMDL	FBtr0078423	ORMDL-RA	674	2.72177	5.20562e-06
FBgn0028421	Kap3	FBtr0343146	Kap3-RN	3768	2.72171	5.20562e-06
FBgn0030420	CG12717	FBtr0073704	CG12717-RA	2734	2.66796	5.20562e-06
FBgn0001215	Hrb98DE	FBtr0085303	Hrb98DE-RF	1530	2.62145	5.20562e-06
FBgn0262736	Vha16-1	FBtr0086152	Vha16-1-RC	2981	2.61748	5.20562e-06
FBgn0035639	kri	FBtr0310534	kri-RC	1191	2.56236	5.20562e-06
FBgn0262736	Vha16-1	FBtr0086150	Vha16-1-RA	2833	2.55995	5.20562e-06
FBgn0030868	CG12986	FBtr0074474	CG12986-RA	531	2.52075	5.20562e-06
FBgn0085322	CG34293	FBtr0112489	CG34293-RA	446	2.50721	5.20562e-06
FBgn0036502	CG7841	FBtr0075604	CG7841-RA	1377	2.43921	5.20562e-06
FBgn0040809	CG13465	FBtr0075674	CG13465-RA	602	2.37604	5.20562e-06
FBgn0040487	BobA	FBtr0075673	BobA-RA	627	2.35882	5.20562e-06
FBgn0066114	GlcAT-I	FBtr0070644	GlcAT-I-RA	1560	2.35353	5.20562e-06
FBgn0000411	D	FBtr0333035	D-RC	1928	2.32489	5.20562e-06
FBgn0031195	CG17600	FBtr0333713	CG17600-RC	973	2.31228	5.20562e-06
FBgn0263051	CG43346	FBtr0306976	CG43346-RB	579	2.25831	5.20562e-06
FBgn0030931	Xrcc2	FBtr0074592	Xrcc2-RA	1132	2.2466	5.20562e-06
FBgn0033871	CG13339	FBtr0087632	CG13339-RA	662	2.22117	5.20562e-06
FBgn0052428	CG32428	FBtr0078222	CG32428-RA	1213	2.20577	5.20562e-06
FBgn0040890	ksh	FBtr0300214	ksh-RB	435	2.18979	5.20562e-06
FBgn0035679	CG10467	FBtr0077063	CG10467-RA	1544	2.17482	5.20562e-06
FBgn0028789	Doc1	FBtr0076522	Doc1-RA	1526	2.16405	5.20562e-06
FBgn0039280	Mocs2B	FBtr0084782	Mocs2B-RA	1420	2.15807	5.20562e-06
FBgn0035998	CG3437	FBtr0301032	CG3437-RB	1126	2.14844	5.20562e-06
FBgn0032014	CG7840	FBtr0079598	CG7840-RA	1156	2.12437	5.20562e-06
FBgn0030481	CG1662	FBtr0342624	CG1662-RB	1603	2.11777	5.20562e-06
FBgn0029502	COQ7	FBtr0070963	COQ7-RA	899	2.09877	5.20562e-06
FBgn0031818	CG9536	FBtr0079267	CG9536-RA	1944	2.05995	5.20562e-06
FBgn0034803	CG9849	FBtr0302895	CG9849-RB	920	2.04807	5.20562e-06
FBgn0025776	ind	FBtr0333875	ind-RB	1126	2.03432	5.20562e-06
FBgn0263993	CG43736	FBtr0330264	CG43736-RB	4330	1.99476	5.20562e-06
FBgn0262736	Vha16-1	FBtr0086153	Vha16-1-RD	2816	1.99408	5.20562e-06
FBgn0029854	CG3566	FBtr0089870	CG3566-RB	550	1.97755	5.20562e-06
FBgn0031818	CG9536	FBtr0303229	CG9536-RB	1888	1.97429	5.20562e-06
FBgn0003742	tra2	FBtr0089617	tra2-RA	1376	1.966	5.20562e-06
FBgn0036502	CG7841	FBtr0334085	CG7841-RB	1628	1.95995	5.20562e-06
FBgn0039135	CG13603	FBtr0084510	CG13603-RA	1046	1.94409	5.20562e-06
FBgn0038533	CG7523	FBtr0083490	CG7523-RA	1134	1.93847	5.20562e-06
FBgn0031719	CG18269	FBtr0079103	CG18269-RA	919	1.9338	5.20562e-06
FBgn0031988	CG8668	FBtr0079576	CG8668-RA	2889	1.89715	5.20562e-06
FBgn0003742	tra2	FBtr0089619	tra2-RC	1568	1.89532	5.20562e-06
FBgn0085444	mute	FBtr0112692	mute-RD	3340	1.88038	5.20562e-06
FBgn0029929	CG4593	FBtr0071009	CG4593-RA	1123	1.85916	5.20562e-06
FBgn0034808	CG9896	FBtr0071988	CG9896-RA	2043	1.84569	5.20562e-06
FBgn0044028	Notum	FBtr0075435	Notum-RA	3792	1.84445	5.20562e-06
FBgn0259238	CG42336	FBtr0299853	CG42336-RB	509	1.84396	5.20562e-06
FBgn0030794	CG13005	FBtr0074334	CG13005-RA	2027	1.84259	5.20562e-06
FBgn0042125	CG18787	FBtr0321267	CG18787-RB	1386	1.83804	5.20562e-06
FBgn0011476	l(3)neo43	FBtr0334696	l(3)neo43-RC	627	1.83699	5.20562e-06
FBgn0031378	CG15362	FBtr0077814	CG15362-RA	813	1.82988	5.20562e-06
FBgn0038197	foxo	FBtr0305052	foxo-RF	3708	1.82898	5.20562e-06
FBgn0032197	CG5694	FBtr0079953	CG5694-RA	2132	1.81466	5.20562e-06
FBgn0266724	Trs20	FBtr0075491	Trs20-RA	575	1.81385	5.20562e-06
FBgn0038418	pad	FBtr0301514	pad-RB	3276	1.79225	5.20562e-06
FBgn0037720	CG8312	FBtr0334616	CG8312-RC	3476	1.78101	5.20562e-06
FBgn0033547	CG12935	FBtr0332886	CG12935-RB	918	1.76991	5.20562e-06
FBgn0030673	CG15601	FBtr0339683	CG15601-RB	1485	1.76606	5.20562e-06
FBgn0028397	Tob	FBtr0301652	Tob-RC	7852	1.76096	5.20562e-06
FBgn0032715	CG17597	FBtr0081121	CG17597-RA	1354	1.75802	5.20562e-06
FBgn0037134	CG7407	FBtr0078440	CG7407-RA	1049	1.74935	5.20562e-06
FBgn0035639	kri	FBtr0310533	kri-RB	1045	1.74367	5.20562e-06
FBgn0011704	RnrS	FBtr0088046	RnrS-RA	1593	1.74091	5.20562e-06
FBgn0033683	CG18343	FBtr0333061	CG18343-RB	630	1.73265	5.20562e-06
FBgn0031091	Phf7	FBtr0070027	Phf7-RA	2221	1.72865	5.20562e-06
FBgn0037603	CG11753	FBtr0081879	CG11753-RA	699	1.71176	5.20562e-06
FBgn0015664	Dref	FBtr0079889	Dref-RA	2872	1.7116	5.20562e-06
FBgn0002283	l(3)73Ah	FBtr0307336	l(3)73Ah-RB	1322	1.70028	5.20562e-06
FBgn0030703	MSBP	FBtr0301598	MSBP-RB	1420	1.69897	5.20562e-06
FBgn0030608	Lsd-2	FBtr0110968	Lsd-2-RB	2097	1.68354	5.20562e-06
FBgn0028664	VhaM9.7-c	FBtr0073256	VhaM9.7-c-RA	848	1.68112	5.20562e-06
FBgn0029854	CG3566	FBtr0089869	CG3566-RC	1607	1.68061	5.20562e-06
FBgn0036173	CG7394	FBtr0076098	CG7394-RA	534	1.67425	5.20562e-06
FBgn0061515	endos	FBtr0075783	endos-RB	852	1.65091	5.20562e-06
FBgn0020910	RpL3	FBtr0336783	RpL3-RH	1610	1.64943	5.20562e-06
FBgn0000251	cad	FBtr0081413	cad-RB	2353	1.64823	5.20562e-06
FBgn0039757	RpS7	FBtr0339183	RpS7-RE	813	1.63264	5.20562e-06
FBgn0032445	CG6153	FBtr0340541	CG6153-RC	821	1.63095	5.20562e-06
FBgn0035965	Use1	FBtr0076537	Use1-RA	980	1.6291	5.20562e-06
FBgn0034231	APC10	FBtr0086951	APC10-RA	867	1.61891	5.20562e-06
FBgn0011476	l(3)neo43	FBtr0301089	l(3)neo43-RB	460	1.61843	5.20562e-06
FBgn0035639	kri	FBtr0077112	kri-RA	1106	1.61242	5.20562e-06
FBgn0030447	CG2200	FBtr0073721	CG2200-RA	1055	1.60728	5.20562e-06
FBgn0036144	GlcAT-P	FBtr0306255	GlcAT-P-RE	3161	1.60572	5.20562e-06
FBgn0031491	alpha4GT1	FBtr0077670	alpha4GT1-RA	1714	1.60297	5.20562e-06
FBgn0005648	Pabp2	FBtr0088785	Pabp2-RA	1869	1.60025	5.20562e-06
FBgn0028397	Tob	FBtr0074255	Tob-RA	3639	1.59497	5.20562e-06
FBgn0031677	CG14036	FBtr0079029	CG14036-RA	438	1.5862	5.20562e-06
FBgn0003742	tra2	FBtr0089620	tra2-RF	1381	1.57804	5.20562e-06
FBgn0015218	eIF4E1	FBtr0076491	eIF4E1-RG	1358	1.57048	5.20562e-06
FBgn0036144	GlcAT-P	FBtr0100422	GlcAT-P-RC	3266	1.56428	5.20562e-06
FBgn0031359	Rim2	FBtr0077910	Rim2-RA	1762	1.56125	5.20562e-06
FBgn0033550	CG12341	FBtr0088251	CG12341-RA	1100	1.54827	5.20562e-06
FBgn0038877	CG3308	FBtr0084102	CG3308-RA	2124	1.51947	5.20562e-06
FBgn0032390	dgt2	FBtr0080285	dgt2-RA	842	1.51467	5.20562e-06
FBgn0030294	Pa1	FBtr0073456	Pa1-RA	1628	1.51401	5.20562e-06
FBgn0033459	CG12744	FBtr0088377	CG12744-RA	906	1.51192	5.20562e-06
FBgn0035678	CG10469	FBtr0077064	CG10469-RA	1067	1.51169	5.20562e-06
FBgn0002561	l(1)sc	FBtr0070074	l(1)sc-RA	1097	1.50652	5.20562e-06
FBgn0035824	CG8281	FBtr0076748	CG8281-RA	1301	1.50494	5.20562e-06
FBgn0052428	CG32428	FBtr0300452	CG32428-RB	1804	1.50386	5.20562e-06
FBgn0034946	CG3065	FBtr0072154	CG3065-RB	1657	1.50159	5.20562e-06
FBgn0027552	CG10863	FBtr0073171	CG10863-RA	1089	1.5003	5.20562e-06
FBgn0035444	CG12012	FBtr0073076	CG12012-RA	880	1.49213	5.20562e-06
FBgn0000077	amx	FBtr0307281	amx-RB	1211	1.48489	5.20562e-06
FBgn0014877	Roe1	FBtr0087675	Roe1-RA	1065	1.47664	5.20562e-06
FBgn0034091	mrj	FBtr0087194	mrj-RB	2126	1.45092	5.20562e-06
FBgn0032231	CG5056	FBtr0080003	CG5056-RA	1255	1.45091	5.20562e-06
FBgn0037922	CG14711	FBtr0082416	CG14711-RA	1319	1.45058	5.20562e-06
FBgn0035964	Dhpr	FBtr0100532	Dhpr-RC	1087	1.4495	5.20562e-06
FBgn0030482	CG1673	FBtr0073777	CG1673-RA	2510	1.44251	5.20562e-06
FBgn0036058	CG6707	FBtr0076356	CG6707-RA	1954	1.43774	5.20562e-06
FBgn0010105	comm	FBtr0075579	comm-RA	1678	1.43358	5.20562e-06
FBgn0037720	CG8312	FBtr0082075	CG8312-RA	4099	1.43328	5.20562e-06
FBgn0042180	CG18870	FBtr0071688	CG18870-RA	2019	1.43039	5.20562e-06
FBgn0067622	LSm-4	FBtr0091657	LSm-4-RB	1578	1.42949	5.20562e-06
FBgn0032293	Dpy-30L1	FBtr0080112	Dpy-30L1-RA	655	1.42864	5.20562e-06
FBgn0038976	Pfdn5	FBtr0084257	Pfdn5-RA	657	1.42457	5.20562e-06
FBgn0036847	CNPYb	FBtr0075034	CNPYb-RA	1328	1.42134	5.20562e-06
FBgn0083952	CG34116	FBtr0110816	CG34116-RA	796	1.41604	5.20562e-06
FBgn0038545	pasi1	FBtr0083513	pasi1-RA	816	1.4093	5.20562e-06
FBgn0040239	bc10	FBtr0077084	bc10-RA	1380	1.40231	5.20562e-06
FBgn0036932	CG14184	FBtr0074872	CG14184-RA	759	1.40195	5.20562e-06
FBgn0029929	CG4593	FBtr0343331	CG4593-RB	889	1.40088	5.20562e-06
FBgn0036777	CG7341	FBtr0075123	CG7341-RA	1436	1.39587	5.20562e-06
FBgn0013750	Arf51F	FBtr0087376	Arf51F-RB	1323	1.39419	5.20562e-06
FBgn0033092	CG9422	FBtr0086121	CG9422-RC	1388	1.38873	5.20562e-06
FBgn0032751	CG17343	FBtr0081151	CG17343-RA	571	1.38861	5.20562e-06
FBgn0033665	Zip48C	FBtr0088038	Zip48C-RA	1878	1.38771	5.20562e-06
FBgn0037610	CG8043	FBtr0081902	CG8043-RA	1254	1.38665	5.20562e-06
FBgn0031534	Snx1	FBtr0077517	Snx1-RA	2028	1.38575	5.20562e-06
FBgn0000533	ea	FBtr0083083	ea-RA	1430	1.37921	5.20562e-06
FBgn0031359	Rim2	FBtr0305618	Rim2-RC	2396	1.37752	5.20562e-06
FBgn0015338	CG5861	FBtr0080850	CG5861-RA	1126	1.37713	5.20562e-06
FBgn0036342	CG11279	FBtr0075887	CG11279-RA	452	1.37478	5.20562e-06
FBgn0037350	CG2911	FBtr0113194	CG2911-RB	921	1.37196	5.20562e-06
FBgn0036255	Atg12	FBtr0300011	Atg12-RB	469	1.37029	5.20562e-06
FBgn0029117	Surf1	FBtr0076897	Surf1-RA	1055	1.36661	5.20562e-06
FBgn0052428	CG32428	FBtr0303381	CG32428-RC	1238	1.36487	5.20562e-06
FBgn0003042	Pc	FBtr0078405	Pc-RA	2462	1.35984	5.20562e-06
FBgn0033259	CG11210	FBtr0088781	CG11210-RA	2863	1.35836	5.20562e-06
FBgn0015521	RpS21	FBtr0273293	RpS21-RE	494	1.35573	5.20562e-06
FBgn0028663	VhaM9.7-b	FBtr0078369	VhaM9.7-b-RA	699	1.35457	5.20562e-06
FBgn0010314	Cks30A	FBtr0079799	Cks30A-RA	1147	1.35224	5.20562e-06
FBgn0000216	Brd	FBtr0075621	Brd-RA	532	1.35188	5.20562e-06
FBgn0040623	Spase12	FBtr0085435	Spase12-RA	493	1.35121	5.20562e-06
FBgn0015790	Rab11	FBtr0084011	Rab11-RB	1627	1.34881	5.20562e-06
FBgn0031458	aph-1	FBtr0335127	aph-1-RB	990	1.34856	5.20562e-06
FBgn0030673	CG15601	FBtr0074055	CG15601-RA	1078	1.346	5.20562e-06
FBgn0030109	CG12121	FBtr0071334	CG12121-RA	2954	1.34219	5.20562e-06
FBgn0033808	CG4627	FBtr0087738	CG4627-RA	988	1.33122	5.20562e-06
FBgn0038224	ATPsynE	FBtr0082931	ATPsynE-RA	543	1.33022	5.20562e-06
FBgn0031117	GstT3	FBtr0077310	GstT3-RA	875	1.32574	5.20562e-06
FBgn0262782	Mdh1	FBtr0080050	Mdh1-RA	1159	1.32385	5.20562e-06
FBgn0035956	Doc2	FBtr0076547	Doc2-RA	1945	1.32362	5.20562e-06
FBgn0040366	CG11398	FBtr0070250	CG11398-RA	1487	1.32324	5.20562e-06
FBgn0035065	CG3589	FBtr0072375	CG3589-RA	1772	1.31888	5.20562e-06
FBgn0033232	CG12159	FBtr0088888	CG12159-RA	889	1.3118	5.20562e-06
FBgn0031377	CG15356	FBtr0077869	CG15356-RA	4294	1.31075	5.20562e-06
FBgn0032078	C1GalTA	FBtr0079789	C1GalTA-RC	2019	1.30844	5.20562e-06
FBgn0034184	CG9646	FBtr0086974	CG9646-RA	3435	1.30603	5.20562e-06
FBgn0029935	CG4615	FBtr0071020	CG4615-RA	1973	1.30492	5.20562e-06
FBgn0031317	Charon	FBtr0077979	Charon-RA	1801	1.30489	5.20562e-06
FBgn0030743	CG9921	FBtr0333302	CG9921-RB	685	1.30301	5.20562e-06
FBgn0034876	wmd	FBtr0072114	wmd-RA	1606	1.30188	5.20562e-06
FBgn0032906	RPA2	FBtr0081438	RPA2-RA	963	1.30132	5.20562e-06
FBgn0028662	VhaPPA1-1	FBtr0083005	VhaPPA1-1-RA	1352	1.30105	5.20562e-06
FBgn0031183	CG14621	FBtr0339557	CG14621-RB	2200	1.28878	5.20562e-06
FBgn0015221	Fer2LCH	FBtr0332168	Fer2LCH-RD	1091	1.28652	5.20562e-06
FBgn0039942	CG17163	FBtr0113727	CG17163-RA	1716	1.28487	5.20562e-06
FBgn0030996	CG14194	FBtr0074671	CG14194-RA	1940	1.27992	5.20562e-06
FBgn0033631	Sod3	FBtr0339489	Sod3-RE	1228	1.27527	5.20562e-06
FBgn0029176	eEF1gamma	FBtr0085393	eEF1gamma-RA	1662	1.27361	5.20562e-06
FBgn0020018	Ppox	FBtr0084664	Ppox-RA	1655	1.27336	5.20562e-06
FBgn0025558	CG4101	FBtr0075314	CG4101-RA	465	1.27264	5.20562e-06
FBgn0026737	CG6171	FBtr0083113	CG6171-RA	1001	1.2686	5.20562e-06
FBgn0026085	dgt4	FBtr0070642	dgt4-RA	729	1.26578	5.20562e-06
FBgn0063670	CG40228	FBtr0113841	CG40228-RC	1686	1.26508	5.20562e-06
FBgn0030099	CG12056	FBtr0071305	CG12056-RA	952	1.26418	5.20562e-06
FBgn0030090	fend	FBtr0071349	fend-RB	3566	1.26355	5.20562e-06
FBgn0011837	Tis11	FBtr0333756	Tis11-RC	5009	1.26315	5.20562e-06
FBgn0030291	CG1738	FBtr0073451	CG1738-RA	799	1.26303	5.20562e-06
FBgn0037552	CG7800	FBtr0081795	CG7800-RA	1778	1.26125	5.20562e-06
FBgn0261068	LSm7	FBtr0080934	LSm7-RA	705	1.2596	5.20562e-06
FBgn0086655	jing	FBtr0332950	jing-RJ	7491	1.25449	5.20562e-06
FBgn0052095	CG32095	FBtr0076077	CG32095-RA	1526	1.25445	5.20562e-06
FBgn0036449	bmm	FBtr0075699	bmm-RA	2437	1.24965	5.20562e-06
FBgn0032465	CG12404	FBtr0080430	CG12404-RA	1207	1.24813	5.20562e-06
FBgn0051122	CG31122	FBtr0301432	CG31122-RB	2993	1.2452	5.20562e-06
FBgn0034578	CG15653	FBtr0071545	CG15653-RA	711	1.23798	5.20562e-06
FBgn0042092	CG13773	FBtr0079372	CG13773-RA	1081	1.23373	5.20562e-06
FBgn0037686	RpL34b	FBtr0082049	RpL34b-RB	754	1.22025	5.20562e-06
FBgn0030608	Lsd-2	FBtr0073967	Lsd-2-RA	2148	1.22012	5.20562e-06
FBgn0016053	pgc	FBtr0342987	pgc-RD	643	1.2186	5.20562e-06
FBgn0040020	MED21	FBtr0113739	MED21-RB	863	1.20843	5.20562e-06
FBgn0050109	CG30109	FBtr0340271	CG30109-RB	609	1.20062	5.20562e-06
FBgn0263050	CG43345	FBtr0306974	CG43345-RB	2250	1.20059	5.20562e-06
FBgn0029093	cathD	FBtr0088898	cathD-RA	1396	1.20014	5.20562e-06
FBgn0033777	CG17574	FBtr0087816	CG17574-RA	1162	1.19158	5.20562e-06
FBgn0030693	CG8974	FBtr0074188	CG8974-RD	1280	1.19061	5.20562e-06
FBgn0027615	CG6404	FBtr0076272	CG6404-RA	1605	1.18947	5.20562e-06
FBgn0032871	CG2611	FBtr0081387	CG2611-RA	634	1.1861	5.20562e-06
FBgn0024194	rasp	FBtr0073029	rasp-RA	1673	1.18555	5.20562e-06
FBgn0034918	Pym	FBtr0072233	Pym-RA	983	1.18179	5.20562e-06
FBgn0039044	p53	FBtr0084359	p53-RA	1577	1.17908	5.20562e-06
FBgn0031977	baf	FBtr0079535	baf-RA	607	1.17358	5.20562e-06
FBgn0002962	nos	FBtr0083732	nos-RA	2349	1.17343	5.20562e-06
FBgn0262782	Mdh1	FBtr0345435	Mdh1-RB	1289	1.17242	5.20562e-06
FBgn0034059	CG8320	FBtr0087202	CG8320-RA	981	1.17143	5.20562e-06
FBgn0263005	CG43313	FBtr0346130	CG43313-RB	4326	1.15439	5.20562e-06
FBgn0038903	RpI12	FBtr0084166	RpI12-RA	530	1.1542	5.20562e-06
FBgn0039461	CG5500	FBtr0085064	CG5500-RA	859	1.14712	5.20562e-06
FBgn0038043	CG17202	FBtr0082587	CG17202-RA	777	1.14458	5.20562e-06
FBgn0031039	Shawn	FBtr0074739	Shawn-RD	1618	1.14359	5.20562e-06
FBgn0285950	RpL19	FBtr0072406	RpL19-RB	755	1.14269	5.20562e-06
FBgn0052850	CG32850	FBtr0089123	CG32850-RA	2311	1.14141	5.20562e-06
FBgn0263697	Uba3	FBtr0087585	Uba3-RA	1481	1.13614	5.20562e-06
FBgn0030522	CG11103	FBtr0100218	CG11103-RB	923	1.13307	5.20562e-06
FBgn0000166	bcd	FBtr0081665	bcd-RD	2499	1.12619	5.20562e-06
FBgn0020620	RN-tre	FBtr0087603	RN-tre-RC	2715	1.11916	5.20562e-06
FBgn0011290	Taf12	FBtr0335213	Taf12-RE	897	1.11573	5.20562e-06
FBgn0262975	cnc	FBtr0306750	cnc-RG	3921	1.11508	5.20562e-06
FBgn0030703	MSBP	FBtr0074166	MSBP-RA	1487	1.11426	5.20562e-06
FBgn0050381	PIG-X	FBtr0113374	PIG-X-RB	1177	1.11393	5.20562e-06
FBgn0016701	Rab4	FBtr0086830	Rab4-RA	1316	1.1101	5.20562e-06
FBgn0030710	CG8924	FBtr0074130	CG8924-RB	2575	1.11006	5.20562e-06
FBgn0036107	galla-2	FBtr0076270	galla-2-RA	629	1.10952	5.20562e-06
FBgn0032750	CG10495	FBtr0081150	CG10495-RA	1371	1.10693	5.20562e-06
FBgn0037261	CG9775	FBtr0078894	CG9775-RA	1930	1.1066	5.20562e-06
FBgn0029914	CG4558	FBtr0300177	CG4558-RB	1868	1.10638	5.20562e-06
FBgn0035235	CG7879	FBtr0072827	CG7879-RB	3691	1.10435	5.20562e-06
FBgn0037328	RpL35A	FBtr0078769	RpL35A-RA	621	1.10294	5.20562e-06
FBgn0016694	Pdp1	FBtr0076775	Pdp1-RF	2828	1.10262	5.20562e-06
FBgn0283510	Pal1	FBtr0339422	Pal1-RC	1950	1.09879	5.20562e-06
FBgn0014455	Ahcy	FBtr0346181	Ahcy-RC	2119	1.09687	5.20562e-06
FBgn0038421	CG17931	FBtr0083323	CG17931-RA	762	1.09383	5.20562e-06
FBgn0263602	Tasp1	FBtr0333600	Tasp1-RB	2159	1.09131	5.20562e-06
FBgn0086370	sra	FBtr0083255	sra-RA	1855	1.0894	5.20562e-06
FBgn0284222	CG46306	FBtr0452121	CG46306-RA	2234	1.0893	5.20562e-06
FBgn0264751	Vti1b	FBtr0334144	Vti1b-RA	571	1.08913	5.20562e-06
FBgn0285925	Fas1	FBtr0083332	Fas1-RA	3002	1.08833	5.20562e-06
FBgn0032420	CG6583	FBtr0080358	CG6583-RA	1071	1.08224	5.20562e-06
FBgn0002962	nos	FBtr0335019	nos-RB	2292	1.08081	5.20562e-06
FBgn0037646	CAHbeta	FBtr0081958	CAHbeta-RA	1078	1.08079	5.20562e-06
FBgn0039969	Fis1	FBtr0273211	Fis1-RF	704	1.07979	5.20562e-06
FBgn0030178	Naxe	FBtr0290234	Naxe-RB	1200	1.07846	5.20562e-06
FBgn0031600	CG3652	FBtr0077460	CG3652-RA	867	1.07238	5.20562e-06
FBgn0032943	Tsp39D	FBtr0273404	Tsp39D-RB	2359	1.06755	5.20562e-06
FBgn0027359	Tim8	FBtr0073482	Tim8-RA	661	1.06447	5.20562e-06
FBgn0038739	CG4686	FBtr0334307	CG4686-RB	933	1.06293	5.20562e-06
FBgn0260392	CG42518	FBtr0300662	CG42518-RA	871	1.06064	5.20562e-06
FBgn0033257	sand	FBtr0088780	sand-RA	1978	1.05964	5.20562e-06
FBgn0031381	Npc2a	FBtr0077816	Npc2a-RA	651	1.05858	5.20562e-06
FBgn0030734	CG9911	FBtr0074243	CG9911-RA	1503	1.05443	5.20562e-06
FBgn0039098	GILT3	FBtr0084434	GILT3-RA	773	1.05418	5.20562e-06
FBgn0015393	hoip	FBtr0079846	hoip-RA	569	1.05263	5.20562e-06
FBgn0000259	CkIIbeta	FBtr0073558	CkIIbeta-RB	3121	1.05022	5.20562e-06
FBgn0013750	Arf51F	FBtr0087379	Arf51F-RE	1357	1.04977	5.20562e-06
FBgn0036144	GlcAT-P	FBtr0076190	GlcAT-P-RB	3427	1.0497	5.20562e-06
FBgn0039741	CG7943	FBtr0085560	CG7943-RA	1644	1.04947	5.20562e-06
FBgn0010638	Sec61beta	FBtr0087498	Sec61beta-RA	792	1.04769	5.20562e-06
FBgn0034066	CG8397	FBtr0087261	CG8397-RA	921	1.04734	5.20562e-06
FBgn0024230	Hs2st	FBtr0081288	Hs2st-RA	1652	1.04726	5.20562e-06
FBgn0035980	mRRF1	FBtr0076444	mRRF1-RA	891	1.04204	5.20562e-06
FBgn0010438	mtSSB	FBtr0083277	mtSSB-RA	575	1.03635	5.20562e-06
FBgn0001276	ix	FBtr0088154	ix-RA	727	1.03447	5.20562e-06
FBgn0031435	Elba2	FBtr0077693	Elba2-RA	1493	1.03336	5.20562e-06
FBgn0041585	olf186-F	FBtr0086797	olf186-F-RA	2080	1.03146	5.20562e-06
FBgn0262169	magu	FBtr0088402	magu-RB	2838	1.03105	5.20562e-06
FBgn0004436	Ubc6	FBtr0306106	Ubc6-RC	1142	1.03037	5.20562e-06
FBgn0037777	CG11722	FBtr0082205	CG11722-RA	770	1.02962	5.20562e-06
FBgn0054015	CG34015	FBtr0100070	CG34015-RA	594	1.02798	5.20562e-06
FBgn0033846	mip120	FBtr0087669	mip120-RA	3475	1.02747	5.20562e-06
FBgn0025700	CG5885	FBtr0079900	CG5885-RA	890	1.02509	5.20562e-06
FBgn0036998	CG5969	FBtr0078198	CG5969-RA	947	1.02261	5.20562e-06
FBgn0036331	CG14117	FBtr0306091	CG14117-RD	1049	1.02155	5.20562e-06
FBgn0001180	hb	FBtr0081950	hb-RB	3181	1.02144	5.20562e-06
FBgn0261373	CG33228	FBtr0343490	CG33228-RC	737	1.02062	5.20562e-06
FBgn0284249	Adf1	FBtr0086113	Adf1-RC	1675	1.02013	5.20562e-06
FBgn0051126	CG31126	FBtr0084663	CG31126-RA	589	1.01873	5.20562e-06
FBgn0263278	Fic	FBtr0079257	Fic-RA	1918	1.01872	5.20562e-06
FBgn0023530	CG3740	FBtr0070283	CG3740-RA	829	1.01777	5.20562e-06
FBgn0083167	Neb-cGP	FBtr0071449	Neb-cGP-RA	410	1.01547	5.20562e-06
FBgn0265003	koi	FBtr0335512	koi-RA	4276	1.01441	5.20562e-06
FBgn0267376	SelR	FBtr0082292	SelR-RA	1008	1.01405	5.20562e-06
FBgn0032849	mRpS18B	FBtr0081339	mRpS18B-RB	761	1.0136	5.20562e-06
FBgn0025469	slv	FBtr0088824	slv-RA	1091	1.01335	5.20562e-06
FBgn0032783	CG10237	FBtr0081208	CG10237-RB	1457	1.01085	5.20562e-06
FBgn0031059	CG14229	FBtr0074753	CG14229-RA	797	1.00784	5.20562e-06
FBgn0028360	Cdc7	FBtr0070950	Cdc7-RA	3103	1.00741	5.20562e-06
FBgn0026060	Mipp2	FBtr0070884	Mipp2-RA	2458	1.00608	5.20562e-06
FBgn0036695	Papst2	FBtr0075279	Papst2-RA	1551	1.00562	5.20562e-06
FBgn0020622	Pi3K21B	FBtr0331208	Pi3K21B-RE	4618	1.00515	5.20562e-06
FBgn0032949	Lamp1	FBtr0085896	Lamp1-RA	1583	1.00501	5.20562e-06
FBgn0053199	CG33199	FBtr0088688	CG33199-RA	1091	1.00404	5.20562e-06
FBgn0261722	fwe	FBtr0075542	fwe-RA	1342	1.00332	5.20562e-06
FBgn0011787	mRpL12	FBtr0076511	mRpL12-RA	738	0.999286	5.20562e-06
FBgn0031284	PGAP2	FBtr0078039	PGAP2-RA	1370	0.999157	5.20562e-06
FBgn0032921	Mpp6	FBtr0081469	Mpp6-RA	1335	0.997429	5.20562e-06
FBgn0034025	Pgant1	FBtr0087332	Pgant1-RB	2677	0.995022	5.20562e-06
FBgn0031769	CG9135	FBtr0343121	CG9135-RC	2227	0.995	5.20562e-06
FBgn0028648	mRpL50	FBtr0076891	mRpL50-RA	739	0.994678	5.20562e-06
FBgn0034925	CG5339	FBtr0072220	CG5339-RA	1239	0.992071	5.20562e-06
FBgn0051866	Ada1-2	FBtr0080287	Ada1-2-RA	1089	0.99108	5.20562e-06
FBgn0030196	Psf3	FBtr0071465	Psf3-RA	1150	0.990194	5.20562e-06
FBgn0004394	pdm2	FBtr0080393	pdm2-RA	2171	0.988812	5.20562e-06
FBgn0010452	trn	FBtr0075890	trn-RA	3365	0.988104	5.20562e-06
FBgn0051450	mRpS18A	FBtr0081897	mRpS18A-RA	581	0.987344	5.20562e-06
FBgn0020622	Pi3K21B	FBtr0331205	Pi3K21B-RB	3319	0.986513	5.20562e-06
FBgn0043364	cbt	FBtr0078083	cbt-RA	2041	0.986314	5.20562e-06
FBgn0034703	CG3045	FBtr0071787	CG3045-RA	1663	0.983888	5.20562e-06
FBgn0038769	CG10889	FBtr0083839	CG10889-RA	2176	0.981005	5.20562e-06
FBgn0030973	CG7332	FBtr0074647	CG7332-RA	2146	0.980389	5.20562e-06
FBgn0051961	TBCC	FBtr0077484	TBCC-RA	1333	0.980031	5.20562e-06
FBgn0052579	CG32579	FBtr0074225	CG32579-RA	1296	0.980031	5.20562e-06
FBgn0035266	Gk2	FBtr0072767	Gk2-RC	2336	0.978387	5.20562e-06
FBgn0260860	Bet5	FBtr0085570	Bet5-RA	1051	0.975848	5.20562e-06
FBgn0261067	LSm1	FBtr0071628	LSm1-RA	588	0.974608	5.20562e-06
FBgn0045866	bai	FBtr0084758	bai-RA	807	0.972914	5.20562e-06
FBgn0026250	eIF1A	FBtr0343927	eIF1A-RC	1646	0.969479	5.20562e-06
FBgn0265193	Atf-2	FBtr0339096	Atf-2-RA	1349	0.967762	5.20562e-06
FBgn0038755	Hs6st	FBtr0083846	Hs6st-RA	2657	0.9676	5.20562e-06
FBgn0013750	Arf51F	FBtr0087378	Arf51F-RA	1352	0.965257	5.20562e-06
FBgn0034535	CG11110	FBtr0086231	CG11110-RA	752	0.962898	5.20562e-06
FBgn0015776	nrv1	FBtr0332370	nrv1-RB	1926	0.962713	5.20562e-06
FBgn0034398	CG15098	FBtr0086629	CG15098-RA	953	0.962618	5.20562e-06
FBgn0025381	rush	FBtr0070259	rush-RA	2082	0.962157	5.20562e-06
FBgn0029094	asf1	FBtr0074947	asf1-RA	1505	0.961475	5.20562e-06
FBgn0029709	CHOp24	FBtr0070675	CHOp24-RA	1104	0.960479	5.20562e-06
FBgn0011300	babo	FBtr0088659	babo-RA	4776	0.95963	5.20562e-06
FBgn0028697	RpL15	FBtr0308333	RpL15-RF	788	0.955385	5.20562e-06
FBgn0029161	slmo	FBtr0079217	slmo-RA	1281	0.952297	5.20562e-06
FBgn0015569	alpha-Est10	FBtr0289953	alpha-Est10-RB	2161	0.950384	5.20562e-06
FBgn0267728	otk2	FBtr0088027	otk2-RA	1968	0.946967	5.20562e-06
FBgn0013531	MED20	FBtr0079544	MED20-RA	1037	0.945951	5.20562e-06
FBgn0265784	CrebB	FBtr0074557	CrebB-RF	2072	0.943986	5.20562e-06
FBgn0036853	mRpL21	FBtr0346548	mRpL21-RC	1696	0.942281	5.20562e-06
FBgn0037634	hng2	FBtr0081919	hng2-RA	1207	0.941703	5.20562e-06
FBgn0033639	CG9003	FBtr0113069	CG9003-RD	2902	0.94158	5.20562e-06
FBgn0033624	CG12384	FBtr0088155	CG12384-RA	612	0.937276	5.20562e-06
FBgn0031309	Tfb4	FBtr0077985	Tfb4-RA	999	0.93259	5.20562e-06
FBgn0032790	CG10194	FBtr0081285	CG10194-RA	1215	0.931915	5.20562e-06
FBgn0001977	CIAPIN1	FBtr0080725	CIAPIN1-RA	2358	0.930153	5.20562e-06
FBgn0017551	Rca1	FBtr0079342	Rca1-RA	1552	0.930054	5.20562e-06
FBgn0034126	jtb	FBtr0087157	jtb-RA	822	0.929829	5.20562e-06
FBgn0037235	CG1103	FBtr0078909	CG1103-RA	1343	0.929553	5.20562e-06
FBgn0032858	CG10949	FBtr0081367	CG10949-RA	1539	0.929062	5.20562e-06
FBgn0003114	plu	FBtr0086306	plu-RA	616	0.926385	5.20562e-06
FBgn0011327	Uch-L5	FBtr0076472	Uch-L5-RA	1394	0.9252	5.20562e-06
FBgn0036366	JMJD7	FBtr0075825	JMJD7-RA	1097	0.923582	5.20562e-06
FBgn0029913	Cht11	FBtr0071041	Cht11-RA	1576	0.920962	5.20562e-06
FBgn0039417	CG6073	FBtr0307342	CG6073-RB	1275	0.920412	5.20562e-06
FBgn0030964	Pvf1	FBtr0074640	Pvf1-RA	1896	0.919384	5.20562e-06
FBgn0035435	PIG-C	FBtr0300753	PIG-C-RB	1103	0.918637	5.20562e-06
FBgn0024841	Pcd	FBtr0085458	Pcd-RA	725	0.917434	5.20562e-06
FBgn0003206	Ras64B	FBtr0073212	Ras64B-RA	1620	0.91633	5.20562e-06
FBgn0033341	MrgBP	FBtr0088684	MrgBP-RA	758	0.915011	5.20562e-06
FBgn0032162	CG4592	FBtr0331632	CG4592-RB	1105	0.911325	5.20562e-06
FBgn0030610	CG9065	FBtr0073966	CG9065-RA	521	0.911064	5.20562e-06
FBgn0061198	HSPC300	FBtr0072194	HSPC300-RA	349	0.909027	5.20562e-06
FBgn0030028	Corp	FBtr0071179	Corp-RA	1084	0.907777	5.20562e-06
FBgn0020224	Cbl	FBtr0076614	Cbl-RA	2948	0.907073	5.20562e-06
FBgn0046301	CG7148	FBtr0078448	CG7148-RA	1594	0.90584	5.20562e-06
FBgn0032236	mRpS7	FBtr0080007	mRpS7-RA	789	0.902586	5.20562e-06
FBgn0015000	betaggt-I	FBtr0078991	betaggt-I-RA	1784	0.901975	5.20562e-06
FBgn0033235	CG8728	FBtr0088882	CG8728-RA	1935	0.901294	5.20562e-06
FBgn0040308	Jafrac2	FBtr0072982	Jafrac2-RA	1047	0.900067	5.20562e-06
FBgn0086898	dgo	FBtr0088249	dgo-RA	3142	0.899926	5.20562e-06
FBgn0010317	CycJ	FBtr0073127	CycJ-RA	1478	0.89971	5.20562e-06
FBgn0039153	GatB	FBtr0084584	GatB-RA	1786	0.898924	5.20562e-06
FBgn0038387	blp	FBtr0083203	blp-RA	955	0.898608	5.20562e-06
FBgn0034626	CG10795	FBtr0071609	CG10795-RA	1100	0.898472	5.20562e-06
FBgn0010607	l(2)05714	FBtr0079050	l(2)05714-RA	1049	0.897447	5.20562e-06
FBgn0063670	CG40228	FBtr0333872	CG40228-RF	426	0.895589	5.20562e-06
FBgn0030704	CG15916	FBtr0074117	CG15916-RA	959	0.895361	5.20562e-06
FBgn0011361	ND-ACP	FBtr0072677	ND-ACP-RB	625	0.89523	5.20562e-06
FBgn0034743	RpS16	FBtr0071855	RpS16-RA	573	0.894286	5.20562e-06
FBgn0026257	cav	FBtr0084559	cav-RB	1226	0.892909	5.20562e-06
FBgn0001941	ifc	FBtr0079179	ifc-RA	1784	0.891933	5.20562e-06
FBgn0067102	GlcT	FBtr0071755	GlcT-RA	3394	0.88996	5.20562e-06
FBgn0035461	ntc	FBtr0073185	ntc-RA	1572	0.889076	5.20562e-06
FBgn0031312	Tango14	FBtr0077961	Tango14-RA	1272	0.888331	5.20562e-06
FBgn0033998	row	FBtr0087402	row-RA	4414	0.886987	5.20562e-06
FBgn0039132	AP-1sigma	FBtr0084496	AP-1sigma-RA	1079	0.886454	5.20562e-06
FBgn0267975	vib	FBtr0083745	vib-RA	1178	0.885573	5.20562e-06
FBgn0038524	sll	FBtr0083462	sll-RA	1987	0.883277	5.20562e-06
FBgn0031247	CG11562	FBtr0078130	CG11562-RA	748	0.881867	5.20562e-06
FBgn0034958	CG3907	FBtr0072196	CG3907-RA	1701	0.880852	5.20562e-06
FBgn0036990	mRpL15	FBtr0078227	mRpL15-RA	1029	0.873639	5.20562e-06
FBgn0085442	NKAIN	FBtr0301851	NKAIN-RJ	2311	0.869812	5.20562e-06
FBgn0039869	CG1890	FBtr0085836	CG1890-RA	704	0.869078	5.20562e-06
FBgn0263602	Tasp1	FBtr0075498	Tasp1-RA	1503	0.86767	5.20562e-06
FBgn0026402	NiPp1	FBtr0087058	NiPp1-RA	1349	0.866595	5.20562e-06
FBgn0026737	CG6171	FBtr0112926	CG6171-RB	947	0.862876	5.20562e-06
FBgn0035848	Uxs	FBtr0076690	Uxs-RA	2093	0.862004	5.20562e-06
FBgn0061515	endos	FBtr0075782	endos-RA	1110	0.861958	5.20562e-06
FBgn0037664	CG8420	FBtr0081973	CG8420-RA	1959	0.861166	5.20562e-06
FBgn0267330	KdelR	FBtr0080021	KdelR-RA	1201	0.860506	5.20562e-06
FBgn0031987	CG12375	FBtr0079642	CG12375-RA	1165	0.858394	5.20562e-06
FBgn0054001	CG34001	FBtr0300947	CG34001-RB	587	0.858294	5.20562e-06
FBgn0037609	CG9773	FBtr0081953	CG9773-RA	1021	0.857558	5.20562e-06
FBgn0051005	qless	FBtr0085769	qless-RA	3218	0.857334	5.20562e-06
FBgn0016970	l(2)k10201	FBtr0088505	l(2)k10201-RA	820	0.856927	5.20562e-06
FBgn0039602	CG1647	FBtr0085326	CG1647-RA	4103	0.856646	5.20562e-06
FBgn0011217	eff	FBtr0336876	eff-RC	1913	0.855812	5.20562e-06
FBgn0034081	CG10731	FBtr0344527	CG10731-RB	828	0.854956	5.20562e-06
FBgn0035169	Dci	FBtr0072587	Dci-RA	1210	0.854487	5.20562e-06
FBgn0038446	CG14903	FBtr0083303	CG14903-RA	442	0.85414	5.20562e-06
FBgn0039251	Trf4-2	FBtr0337011	Trf4-2-RB	1429	0.851692	5.20562e-06
FBgn0261933	SmD1	FBtr0075952	SmD1-RA	729	0.850785	5.20562e-06
FBgn0037084	Syx6	FBtr0088103	Syx6-RB	1361	0.850573	5.20562e-06
FBgn0032400	CG6770	FBtr0080306	CG6770-RA	776	0.848371	5.20562e-06
FBgn0032259	CG6144	FBtr0304137	CG6144-RC	1553	0.848081	5.20562e-06
FBgn0001128	Gpdh1	FBtr0079146	Gpdh1-RB	1651	0.841886	5.20562e-06
FBgn0032921	Mpp6	FBtr0343869	Mpp6-RB	680	0.841565	5.20562e-06
FBgn0030391	Rab40	FBtr0073669	Rab40-RB	1618	0.841327	5.20562e-06
FBgn0051249	CG31249	FBtr0083483	CG31249-RA	1176	0.841261	5.20562e-06
FBgn0036853	mRpL21	FBtr0333224	mRpL21-RB	866	0.838963	5.20562e-06
FBgn0031379	CG7289	FBtr0077815	CG7289-RA	2130	0.836671	5.20562e-06
FBgn0035148	CG3402	FBtr0072559	CG3402-RA	1035	0.835754	5.20562e-06
FBgn0069242	eca	FBtr0082098	eca-RA	946	0.835527	5.20562e-06
FBgn0031036	CG14220	FBtr0074768	CG14220-RA	1312	0.835039	5.20562e-06
FBgn0039465	Tsp97E	FBtr0085082	Tsp97E-RA	1433	0.833329	5.20562e-06
FBgn0011509	SrpRbeta	FBtr0333891	SrpRbeta-RB	1135	0.830635	5.20562e-06
FBgn0039188	Golgin84	FBtr0084629	Golgin84-RA	1814	0.829364	5.20562e-06
FBgn0035087	CG2765	FBtr0308687	CG2765-RF	2310	0.829232	5.20562e-06
FBgn0087040	alphaTub67C	FBtr0076393	alphaTub67C-RA	1617	0.823714	5.20562e-06
FBgn0000330	cm	FBtr0071033	cm-RA	1469	0.822934	5.20562e-06
FBgn0259243	Pka-R1	FBtr0299891	Pka-R1-RK	2245	0.822888	5.20562e-06
FBgn0261445	sgl	FBtr0076938	sgl-RA	2275	0.821595	5.20562e-06
FBgn0039099	GILT2	FBtr0084435	GILT2-RA	712	0.821469	5.20562e-06
FBgn0034729	CG10344	FBtr0071841	CG10344-RB	1190	0.821364	5.20562e-06
FBgn0001120	gnu	FBtr0075697	gnu-RA	923	0.817705	5.20562e-06
FBgn0038453	Arl6IP1	FBtr0333728	Arl6IP1-RB	1178	0.814766	5.20562e-06
FBgn0260859	Bet3	FBtr0089879	Bet3-RA	1125	0.813404	5.20562e-06
FBgn0260659	CG42542	FBtr0301101	CG42542-RB	1650	0.813336	5.20562e-06
FBgn0261387	CG17528	FBtr0111277	CG17528-RD	4686	0.810522	5.20562e-06
FBgn0037802	Sirt6	FBtr0305358	Sirt6-RB	1114	0.808691	5.20562e-06
FBgn0047199	CG31517	FBtr0082864	CG31517-RA	827	0.807849	5.20562e-06
FBgn0015521	RpS21	FBtr0335131	RpS21-RF	715	0.80758	5.20562e-06
FBgn0036893	PIG-F	FBtr0074946	PIG-F-RA	1035	0.806893	5.20562e-06
FBgn0082598	akirin	FBtr0076848	akirin-RA	1268	0.806561	5.20562e-06
FBgn0036999	isoQC	FBtr0078200	isoQC-RA	1975	0.800026	5.20562e-06
FBgn0016041	Tom40	FBtr0333748	Tom40-RC	2395	0.799178	5.20562e-06
FBgn0039757	RpS7	FBtr0089422	RpS7-RA	725	0.796761	5.20562e-06
FBgn0031834	CG13766	FBtr0079330	CG13766-RA	1819	0.795718	5.20562e-06
FBgn0040070	Trx-2	FBtr0079840	Trx-2-RA	790	0.794599	5.20562e-06
FBgn0000384	cta	FBtr0111126	cta-RA	2156	0.793433	5.20562e-06
FBgn0040477	cid	FBtr0087667	cid-RA	1015	0.792934	5.20562e-06
FBgn0015298	Srp19	FBtr0076879	Srp19-RA	653	0.792072	5.20562e-06
FBgn0032052	PIG-U	FBtr0079682	PIG-U-RA	1478	0.791189	5.20562e-06
FBgn0011761	dhd	FBtr0070749	dhd-RA	772	0.788526	5.20562e-06
FBgn0025830	IntS8	FBtr0087036	IntS8-RA	3293	0.788063	5.20562e-06
FBgn0033990	CG10265	FBtr0087421	CG10265-RA	1230	0.787642	5.20562e-06
FBgn0004837	Su(H)	FBtr0080700	Su(H)-RA	2950	0.787405	5.20562e-06
FBgn0050022	CG30022	FBtr0289990	CG30022-RB	1356	0.786012	5.20562e-06
FBgn0032421	crok	FBtr0080342	crok-RA	1033	0.785633	5.20562e-06
FBgn0038099	CG7091	FBtr0300278	CG7091-RB	1880	0.783595	5.20562e-06
FBgn0086687	Desat1	FBtr0082630	Desat1-RD	1934	0.781848	5.20562e-06
FBgn0040339	MED22	FBtr0070165	MED22-RA	602	0.781819	5.20562e-06
FBgn0263987	spoon	FBtr0070795	spoon-RC	4509	0.78126	5.20562e-06
FBgn0025820	JTBR	FBtr0332876	JTBR-RB	789	0.780954	5.20562e-06
FBgn0027657	glob1	FBtr0083247	glob1-RA	1274	0.780524	5.20562e-06
FBgn0262511	Vha44	FBtr0087175	Vha44-RC	2693	0.779302	5.20562e-06
FBgn0263027	CG43322	FBtr0306926	CG43322-RA	1272	0.778996	5.20562e-06
FBgn0023527	CG3071	FBtr0070398	CG3071-RA	1921	0.778987	5.20562e-06
FBgn0265177	CG44242	FBtr0339085	CG44242-RB	456	0.778362	5.20562e-06
FBgn0264979	CG4267	FBtr0077751	CG4267-RA	1322	0.777638	5.20562e-06
FBgn0039561	mfrn	FBtr0085266	mfrn-RA	3037	0.775925	5.20562e-06
FBgn0026879	CG13364	FBtr0070159	CG13364-RA	387	0.775906	5.20562e-06
FBgn0033979	Cyp6a19	FBtr0339984	Cyp6a19-RB	1903	0.774977	5.20562e-06
FBgn0031403	CG15387	FBtr0113015	CG15387-RB	693	0.77447	5.20562e-06
FBgn0026084	cib	FBtr0070639	cib-RA	896	0.773389	5.20562e-06
FBgn0040080	pins	FBtr0085189	pins-RA	3279	0.773366	5.20562e-06
FBgn0267861	Maf1	FBtr0113829	Maf1-RA	1155	0.773089	5.20562e-06
FBgn0260747	Chchd2	FBtr0074387	Chchd2-RA	997	0.772702	5.20562e-06
FBgn0016041	Tom40	FBtr0071073	Tom40-RA	1676	0.772106	5.20562e-06
FBgn0031676	senju	FBtr0079009	senju-RA	1605	0.770582	5.20562e-06
FBgn0031651	mRpL24	FBtr0079058	mRpL24-RA	875	0.768069	5.20562e-06
FBgn0010431	mtrm	FBtr0076613	mtrm-RA	1092	0.766839	5.20562e-06
FBgn0037262	MED31	FBtr0078857	MED31-RB	823	0.763779	5.20562e-06
FBgn0036815	HipHop	FBtr0075056	HipHop-RA	1124	0.76262	5.20562e-06
FBgn0050147	Hil	FBtr0086255	Hil-RB	3383	0.762008	5.20562e-06
FBgn0052576	CG32576	FBtr0100556	CG32576-RB	686	0.760571	5.20562e-06
FBgn0031657	CG3756	FBtr0078994	CG3756-RA	1153	0.760552	5.20562e-06
FBgn0030060	CG2004	FBtr0071281	CG2004-RA	1659	0.757402	5.20562e-06
FBgn0036906	CG14102	FBtr0074928	CG14102-RA	2055	0.757391	5.20562e-06
FBgn0033699	RpS11	FBtr0088007	RpS11-RC	738	0.75624	5.20562e-06
FBgn0032979	Clamp	FBtr0085964	Clamp-RA	2636	0.754996	5.20562e-06
FBgn0038989	CG6937	FBtr0084266	CG6937-RA	1307	0.754393	5.20562e-06
FBgn0032197	CG5694	FBtr0079954	CG5694-RB	2388	0.754113	5.20562e-06
FBgn0010808	Chchd3	FBtr0085745	Chchd3-RA	940	0.753494	5.20562e-06
FBgn0037008	mTerf3	FBtr0078215	mTerf3-RA	1124	0.750556	5.20562e-06
FBgn0038039	CG5196	FBtr0082584	CG5196-RA	1679	0.749506	5.20562e-06
FBgn0034763	RYBP	FBtr0071868	RYBP-RA	2064	0.749472	5.20562e-06
FBgn0051360	CG31360	FBtr0083480	CG31360-RA	649	0.748191	5.20562e-06
FBgn0024330	MED6	FBtr0339719	MED6-RE	1617	0.746284	5.20562e-06
FBgn0264291	Det	FBtr0083408	Det-RA	651	0.745999	5.20562e-06
FBgn0010520	Bka	FBtr0079874	Bka-RA	758	0.745242	5.20562e-06
FBgn0034921	DCP1	FBtr0072223	DCP1-RA	1513	0.744239	5.20562e-06
FBgn0038683	CG11779	FBtr0335020	CG11779-RE	2474	0.743915	5.20562e-06
FBgn0039459	IntS12	FBtr0085061	IntS12-RA	1184	0.743312	5.20562e-06
FBgn0030039	CG12123	FBtr0071245	CG12123-RA	1044	0.741902	5.20562e-06
FBgn0031529	CG9662	FBtr0332407	CG9662-RB	846	0.741143	5.20562e-06
FBgn0086445	l(2)37Cd	FBtr0081156	l(2)37Cd-RA	1821	0.741122	5.20562e-06
FBgn0005278	Sam-S	FBtr0089433	Sam-S-RF	2353	0.738772	5.20562e-06
FBgn0053303	CG33303	FBtr0080052	CG33303-RA	1516	0.73514	5.20562e-06
FBgn0033902	eIF3m	FBtr0339964	eIF3m-RB	1386	0.734222	5.20562e-06
FBgn0033995	GPHR	FBtr0087404	GPHR-RA	1780	0.733128	5.20562e-06
FBgn0260959	MCPH1	FBtr0301431	MCPH1-RD	3360	0.73293	5.20562e-06
FBgn0052425	CG32425	FBtr0078202	CG32425-RC	2077	0.732304	5.20562e-06
FBgn0046214	vig2	FBtr0084776	vig2-RC	1701	0.7318	5.20562e-06
FBgn0267972	Der-1	FBtr0077813	Der-1-RA	1088	0.730214	5.20562e-06
FBgn0035473	mge	FBtr0073176	mge-RA	1088	0.727548	5.20562e-06
FBgn0030700	CG15914	FBtr0074105	CG15914-RA	1422	0.726603	5.20562e-06
FBgn0029860	CG15891	FBtr0100319	CG15891-RA	599	0.726021	5.20562e-06
FBgn0039942	CG17163	FBtr0309316	CG17163-RB	1451	0.7238	5.20562e-06
FBgn0053229	CG33229	FBtr0072499	CG33229-RA	1500	0.723358	5.20562e-06
FBgn0050382	CG30382	FBtr0088894	CG30382-RA	952	0.721603	5.20562e-06
FBgn0033948	CG12863	FBtr0087500	CG12863-RA	1417	0.71756	5.20562e-06
FBgn0005671	Vha55	FBtr0082670	Vha55-RB	2722	0.716652	5.20562e-06
FBgn0037244	CG14647	FBtr0290222	CG14647-RB	1178	0.71621	5.20562e-06
FBgn0037890	CG17734	FBtr0082360	CG17734-RA	764	0.715455	5.20562e-06
FBgn0038307	mRpS10	FBtr0083053	mRpS10-RA	723	0.714877	5.20562e-06
FBgn0000055	Adh	FBtr0100589	Adh-RC	1057	0.713886	5.20562e-06
FBgn0037779	CG12811	FBtr0082204	CG12811-RA	1002	0.713072	5.20562e-06
FBgn0029594	CG14806	FBtr0331384	CG14806-RB	770	0.712869	5.20562e-06
FBgn0030239	CG17333	FBtr0073379	CG17333-RA	847	0.712839	5.20562e-06
FBgn0031069	Pmp70	FBtr0074795	Pmp70-RA	2975	0.711583	5.20562e-06
FBgn0030092	fh	FBtr0071348	fh-RA	923	0.70998	5.20562e-06
FBgn0029905	Nf-YC	FBtr0070974	Nf-YC-RA	2522	0.708892	5.20562e-06
FBgn0000063	Mps1	FBtr0083478	Mps1-RA	2113	0.707153	5.20562e-06
FBgn0024889	Kap-alpha1	FBtr0074881	Kap-alpha1-RA	2322	0.707133	5.20562e-06
FBgn0033177	CG11141	FBtr0088999	CG11141-RA	2497	0.706967	5.20562e-06
FBgn0001124	Got1	FBtr0087232	Got1-RA	1683	0.706471	5.20562e-06
FBgn0038251	Hexim	FBtr0082967	Hexim-RA	1515	0.703513	5.20562e-06
FBgn0039642	CG11882	FBtr0085411	CG11882-RA	1087	0.703499	5.20562e-06
FBgn0035209	msd1	FBtr0072678	msd1-RA	528	0.703204	5.20562e-06
FBgn0035713	velo	FBtr0345025	velo-RD	2490	0.70201	5.20562e-06
FBgn0002973	numb	FBtr0079821	numb-RB	2956	0.701886	5.20562e-06
FBgn0051363	Jupiter	FBtr0082452	Jupiter-RD	1517	0.701503	5.20562e-06
FBgn0037312	CG11999	FBtr0078807	CG11999-RA	904	0.700528	5.20562e-06
FBgn0051357	CG31357	FBtr0084735	CG31357-RA	1681	0.70041	5.20562e-06
FBgn0033737	Nup54	FBtr0087952	Nup54-RA	2048	0.697443	5.20562e-06
FBgn0031711	CG6907	FBtr0343257	CG6907-RB	1512	0.696691	5.20562e-06
FBgn0283536	Vha13	FBtr0083804	Vha13-RA	703	0.696538	5.20562e-06
FBgn0035475	CG10866	FBtr0073173	CG10866-RA	1337	0.696222	5.20562e-06
FBgn0036405	CG6833	FBtr0075774	CG6833-RA	1264	0.693854	5.20562e-06
FBgn0024432	Dlc90F	FBtr0083575	Dlc90F-RA	816	0.693683	5.20562e-06
FBgn0031068	Alr	FBtr0074794	Alr-RA	1107	0.692647	5.20562e-06
FBgn0032222	CG5037	FBtr0079992	CG5037-RA	1473	0.692547	5.20562e-06
FBgn0015791	Rab14	FBtr0080627	Rab14-RB	1468	0.690704	5.20562e-06
FBgn0030096	Zpr1	FBtr0071342	Zpr1-RA	1853	0.690465	5.20562e-06
FBgn0035529	Fdx2	FBtr0300775	Fdx2-RB	863	0.689749	5.20562e-06
FBgn0058002	ND-AGGG	FBtr0113773	ND-AGGG-RA	745	0.688264	5.20562e-06
FBgn0031768	CG12393	FBtr0343120	CG12393-RD	1213	0.686562	5.20562e-06
FBgn0030628	CG9114	FBtr0074020	CG9114-RA	2315	0.684095	5.20562e-06
FBgn0285947	RpS10b	FBtr0074731	RpS10b-RB	743	0.683667	5.20562e-06
FBgn0031231	mRpL10	FBtr0078124	mRpL10-RA	903	0.683039	5.20562e-06
FBgn0033391	CG8026	FBtr0302512	CG8026-RD	1941	0.682639	5.20562e-06
FBgn0037200	CG11109	FBtr0078552	CG11109-RB	1415	0.682237	5.20562e-06
FBgn0037719	bocks	FBtr0100537	bocks-RB	1535	0.682139	5.20562e-06
FBgn0267976	Tim23	FBtr0113781	Tim23-RA	893	0.681614	5.20562e-06
FBgn0036824	CG3902	FBtr0075076	CG3902-RA	1585	0.681391	5.20562e-06
FBgn0011705	rost	FBtr0079782	rost-RA	1378	0.681135	5.20562e-06
FBgn0032030	Wdr82	FBtr0079650	Wdr82-RA	1089	0.680759	5.20562e-06
FBgn0037614	TMEM216	FBtr0081905	TMEM216-RA	1831	0.678155	5.20562e-06
FBgn0037020	Pex14	FBtr0078251	Pex14-RA	1249	0.676569	5.20562e-06
FBgn0025615	Torsin	FBtr0070690	Torsin-RA	1184	0.674341	5.20562e-06
FBgn0086355	Tpi	FBtr0085583	Tpi-RB	1112	0.673757	5.20562e-06
FBgn0266674	Sec15	FBtr0084034	Sec15-RA	2799	0.673691	5.20562e-06
FBgn0286213	RpS12	FBtr0075878	RpS12-RB	613	0.672581	5.20562e-06
FBgn0032032	CG17294	FBtr0079651	CG17294-RA	1012	0.672062	5.20562e-06
FBgn0030960	Atg101	FBtr0074635	Atg101-RA	1850	0.67178	5.20562e-06
FBgn0042083	Mccc2	FBtr0086126	Mccc2-RA	2141	0.670352	5.20562e-06
FBgn0032477	CG5287	FBtr0080436	CG5287-RA	1557	0.670277	5.20562e-06
FBgn0037121	Rpb8	FBtr0078432	Rpb8-RA	692	0.670049	5.20562e-06
FBgn0038608	WRNexo	FBtr0083586	WRNexo-RA	1495	0.668967	5.20562e-06
FBgn0034141	CG8311	FBtr0087121	CG8311-RA	1897	0.666596	5.20562e-06
FBgn0034804	CG3831	FBtr0071993	CG3831-RA	1562	0.666261	5.20562e-06
FBgn0034008	CG8152	FBtr0087392	CG8152-RA	1204	0.665939	5.20562e-06
FBgn0013799	Deaf1	FBtr0074882	Deaf1-RA	2425	0.665561	5.20562e-06
FBgn0038771	CG4390	FBtr0083837	CG4390-RA	1006	0.664011	5.20562e-06
FBgn0030137	CG15317	FBtr0071371	CG15317-RA	825	0.66323	5.20562e-06
FBgn0035059	CG3894	FBtr0300130	CG3894-RC	1542	0.661028	5.20562e-06
FBgn0034455	CG11007	FBtr0086464	CG11007-RA	1201	0.660791	5.20562e-06
FBgn0030136	RpS28b	FBtr0071360	RpS28b-RA	520	0.660126	5.20562e-06
FBgn0002626	RpL32	FBtr0085592	RpL32-RB	524	0.660038	5.20562e-06
FBgn0039589	CG9986	FBtr0085304	CG9986-RA	2179	0.659511	5.20562e-06
FBgn0023513	CG14803	FBtr0070310	CG14803-RA	3419	0.659052	5.20562e-06
FBgn0030465	CG15743	FBtr0073755	CG15743-RA	1650	0.658349	5.20562e-06
FBgn0052736	CG32736	FBtr0071008	CG32736-RB	635	0.657152	5.20562e-06
FBgn0266441	CG45071	FBtr0344433	CG45071-RA	1867	0.657065	5.20562e-06
FBgn0086446	DCTN6-p27	FBtr0081157	DCTN6-p27-RA	708	0.654886	5.20562e-06
FBgn0033241	CG2915	FBtr0088879	CG2915-RA	1611	0.654754	5.20562e-06
FBgn0053100	eIF4EHP	FBtr0300475	eIF4EHP-RB	2401	0.652071	5.20562e-06
FBgn0034436	CG11961	FBtr0086519	CG11961-RB	2960	0.650276	5.20562e-06
FBgn0052446	Atox1	FBtr0078426	Atox1-RA	903	0.6491	5.20562e-06
FBgn0010551	Phb2	FBtr0086615	Phb2-RB	1518	0.648322	5.20562e-06
FBgn0039150	CG13605	FBtr0300705	CG13605-RB	2174	0.64787	5.20562e-06
FBgn0033127	Tsp42Ef	FBtr0089023	Tsp42Ef-RA	1347	0.64727	5.20562e-06
FBgn0002566	lt	FBtr0111125	lt-RA	2804	0.64692	5.20562e-06
FBgn0004889	tws	FBtr0082188	tws-RB	2896	0.646483	5.20562e-06
FBgn0036005	pall	FBtr0076471	pall-RA	1206	0.646212	5.20562e-06
FBgn0040751	CG13018	FBtr0087581	CG13018-RA	379	0.645375	5.20562e-06
FBgn0033391	CG8026	FBtr0302511	CG8026-RC	1489	0.643562	5.20562e-06
FBgn0026634	ldlCp	FBtr0083114	ldlCp-RA	3015	0.642794	5.20562e-06
FBgn0033784	SCCRO3	FBtr0087803	SCCRO3-RC	2105	0.642725	5.20562e-06
FBgn0033544	CG7220	FBtr0088217	CG7220-RC	1672	0.641772	5.20562e-06
FBgn0260855	Sec22	FBtr0070141	Sec22-RA	1743	0.641154	5.20562e-06
FBgn0032244	RfC3	FBtr0080019	RfC3-RA	1134	0.640888	5.20562e-06
FBgn0017430	Nelf-E	FBtr0076650	Nelf-E-RA	1227	0.640005	5.20562e-06
FBgn0037009	CG5104	FBtr0078209	CG5104-RB	787	0.639639	5.20562e-06
FBgn0053155	CG33155	FBtr0100452	CG33155-RC	829	0.638	5.20562e-06
FBgn0022981	rpk	FBtr0078859	rpk-RA	2518	0.637532	5.20562e-06
FBgn0013305	Nmda1	FBtr0089876	Nmda1-RA	1632	0.636828	5.20562e-06
FBgn0036691	beg	FBtr0075278	beg-RA	1198	0.636768	5.20562e-06
FBgn0037655	Kcmf1	FBtr0300746	Kcmf1-RG	2488	0.636619	5.20562e-06
FBgn0036239	Pop2	FBtr0076058	Pop2-RA	1688	0.632527	5.20562e-06
FBgn0030010	CG10959	FBtr0071157	CG10959-RA	1836	0.632172	5.20562e-06
FBgn0034313	CG5726	FBtr0086772	CG5726-RA	3491	0.632095	5.20562e-06
FBgn0032987	RpL21	FBtr0085961	RpL21-RA	614	0.629545	5.20562e-06
FBgn0038149	GILT1	FBtr0082760	GILT1-RA	1122	0.62911	5.20562e-06
FBgn0036335	mRpL20	FBtr0075897	mRpL20-RA	602	0.627728	5.20562e-06
FBgn0043012	AP-2sigma	FBtr0084103	AP-2sigma-RA	751	0.627615	5.20562e-06
FBgn0039450	CG5484	FBtr0085039	CG5484-RC	1522	0.626748	5.20562e-06
FBgn0000376	crm	FBtr0070495	crm-RB	3837	0.625076	5.20562e-06
FBgn0262732	mbf1	FBtr0330137	mbf1-RE	1085	0.624399	5.20562e-06
FBgn0010315	CycD	FBtr0300391	CycD-RD	2145	0.624236	5.20562e-06
FBgn0015359	CG2034	FBtr0072877	CG2034-RA	1149	0.624198	5.20562e-06
FBgn0033631	Sod3	FBtr0110897	Sod3-RD	1095	0.622133	5.20562e-06
FBgn0262515	VhaAC45	FBtr0088587	VhaAC45-RB	1925	0.620953	5.20562e-06
FBgn0001125	Got2	FBtr0077867	Got2-RA	1575	0.620918	5.20562e-06
FBgn0035993	Nf-YA	FBtr0076504	Nf-YA-RA	2055	0.615775	5.20562e-06
FBgn0262512	Vha14-1	FBtr0087341	Vha14-1-RA	659	0.615743	5.20562e-06
FBgn0035283	CG12024	FBtr0072833	CG12024-RB	1774	0.614659	5.20562e-06
FBgn0051460	CG31460	FBtr0081873	CG31460-RA	554	0.614109	5.20562e-06
FBgn0034585	Rbpn-5	FBtr0071640	Rbpn-5-RA	2319	0.613969	5.20562e-06
FBgn0015602	BEAF-32	FBtr0087442	BEAF-32-RB	1173	0.612975	5.20562e-06
FBgn0040396	CG3939	FBtr0343600	CG3939-RB	747	0.611021	5.20562e-06
FBgn0038206	twf	FBtr0082891	twf-RA	1377	0.610219	5.20562e-06
FBgn0014010	Rab5	FBtr0077795	Rab5-RD	1739	0.608092	5.20562e-06
FBgn0031267	Ipk2	FBtr0078074	Ipk2-RA	1232	0.607568	5.20562e-06
FBgn0086254	CG6084	FBtr0331547	CG6084-RD	1316	0.607255	5.20562e-06
FBgn0037481	MAGE	FBtr0081606	MAGE-RA	943	0.607112	5.20562e-06
FBgn0027095	Manf	FBtr0083283	Manf-RA	847	0.605892	5.20562e-06
FBgn0266411	sima	FBtr0344373	sima-RC	4704	0.605457	5.20562e-06
FBgn0027495	Smyd4-4	FBtr0087983	Smyd4-4-RA	2474	0.605433	5.20562e-06
FBgn0024360	MTPAP	FBtr0070236	MTPAP-RA	2319	0.605405	5.20562e-06
FBgn0030658	CG7872	FBtr0074046	CG7872-RA	1653	0.602916	5.20562e-06
FBgn0033468	CG1418	FBtr0088440	CG1418-RA	1128	0.601047	5.20562e-06
FBgn0035592	CG10674	FBtr0077181	CG10674-RA	478	0.600471	5.20562e-06
FBgn0037313	CG1161	FBtr0078785	CG1161-RA	945	0.600029	5.20562e-06
FBgn0032005	Snx6	FBtr0079631	Snx6-RA	1803	0.599322	5.20562e-06
FBgn0020407	asun	FBtr0083259	asun-RA	2497	0.598112	5.20562e-06
FBgn0013325	RpL11	FBtr0086533	RpL11-RA	710	0.596532	5.20562e-06
FBgn0019925	Surf4	FBtr0083117	Surf4-RA	1641	0.596429	5.20562e-06
FBgn0029733	CG6927	FBtr0070721	CG6927-RA	1868	0.594308	5.20562e-06
FBgn0259933	CG42456	FBtr0300240	CG42456-RA	2326	0.592586	5.20562e-06
FBgn0260407	mRpS23	FBtr0080566	mRpS23-RA	707	0.592377	5.20562e-06
FBgn0052803	CG32803	FBtr0070356	CG32803-RA	818	0.589065	5.20562e-06
FBgn0030686	mRpL3	FBtr0074090	mRpL3-RA	1243	0.588824	5.20562e-06
FBgn0037671	ATP6AP2	FBtr0081978	ATP6AP2-RA	1468	0.585723	5.20562e-06
FBgn0024994	Ugalt	FBtr0070501	Ugalt-RA	2013	0.585537	5.20562e-06
FBgn0035807	CG7492	FBtr0076821	CG7492-RA	2674	0.58546	5.20562e-06

## Sheet: Unique Pum bound genes
Unique Pum bound genes
FBgn0000055
FBgn0000063
FBgn0000077
FBgn0000166
FBgn0000216
FBgn0000251
FBgn0000259
FBgn0000330
FBgn0000376
FBgn0000384
FBgn0000411
FBgn0000533
FBgn0001120
FBgn0001124
FBgn0001125
FBgn0001128
FBgn0001142
FBgn0001180
FBgn0001215
FBgn0001276
FBgn0001941
FBgn0001977
FBgn0002283
FBgn0002561
FBgn0002566
FBgn0002626
FBgn0002962
FBgn0002973
FBgn0003042
FBgn0003114
FBgn0003165
FBgn0003206
FBgn0003430
FBgn0003742
FBgn0004394
FBgn0004436
FBgn0004648
FBgn0004837
FBgn0004889
FBgn0005278
FBgn0005648
FBgn0005671
FBgn0010105
FBgn0010313
FBgn0010314
FBgn0010315
FBgn0010317
FBgn0010431
FBgn0010438
FBgn0010452
FBgn0010520
FBgn0010551
FBgn0010607
FBgn0010638
FBgn0010808
FBgn0011217
FBgn0011225
FBgn0011290
FBgn0011300
FBgn0011327
FBgn0011361
FBgn0011476
FBgn0011509
FBgn0011704
FBgn0011705
FBgn0011761
FBgn0011787
FBgn0011837
FBgn0013305
FBgn0013325
FBgn0013531
FBgn0013750
FBgn0013799
FBgn0014010
FBgn0014455
FBgn0014877
FBgn0015000
FBgn0015218
FBgn0015221
FBgn0015298
FBgn0015338
FBgn0015359
FBgn0015393
FBgn0015521
FBgn0015569
FBgn0015602
FBgn0015664
FBgn0015776
FBgn0015790
FBgn0015791
FBgn0016041
FBgn0016053
FBgn0016694
FBgn0016701
FBgn0016970
FBgn0017430
FBgn0017551
FBgn0019925
FBgn0020018
FBgn0020224
FBgn0020407
FBgn0020620
FBgn0020622
FBgn0020910
FBgn0022981
FBgn0023513
FBgn0023527
FBgn0023530
FBgn0024194
FBgn0024230
FBgn0024330
FBgn0024360
FBgn0024432
FBgn0024841
FBgn0024889
FBgn0024994
FBgn0025381
FBgn0025469
FBgn0025558
FBgn0025615
FBgn0025700
FBgn0025776
FBgn0025820
FBgn0025830
FBgn0026060
FBgn0026084
FBgn0026085
FBgn0026250
FBgn0026257
FBgn0026402
FBgn0026634
FBgn0026737
FBgn0026879
FBgn0027095
FBgn0027343
FBgn0027359
FBgn0027495
FBgn0027552
FBgn0027615
FBgn0027657
FBgn0028360
FBgn0028397
FBgn0028421
FBgn0028648
FBgn0028662
FBgn0028663
FBgn0028664
FBgn0028697
FBgn0028789
FBgn0028979
FBgn0029093
FBgn0029094
FBgn0029117
FBgn0029161
FBgn0029176
FBgn0029502
FBgn0029594
FBgn0029709
FBgn0029733
FBgn0029854
FBgn0029860
FBgn0029905
FBgn0029913
FBgn0029914
FBgn0029929
FBgn0029935
FBgn0030010
FBgn0030028
FBgn0030039
FBgn0030060
FBgn0030090
FBgn0030092
FBgn0030096
FBgn0030099
FBgn0030109
FBgn0030136
FBgn0030137
FBgn0030178
FBgn0030196
FBgn0030239
FBgn0030291
FBgn0030294
FBgn0030391
FBgn0030420
FBgn0030447
FBgn0030465
FBgn0030481
FBgn0030482
FBgn0030522
FBgn0030608
FBgn0030610
FBgn0030628
FBgn0030658
FBgn0030673
FBgn0030686
FBgn0030693
FBgn0030700
FBgn0030703
FBgn0030704
FBgn0030710
FBgn0030734
FBgn0030743
FBgn0030753
FBgn0030794
FBgn0030868
FBgn0030931
FBgn0030960
FBgn0030964
FBgn0030973
FBgn0030996
FBgn0031036
FBgn0031039
FBgn0031059
FBgn0031068
FBgn0031069
FBgn0031077
FBgn0031091
FBgn0031117
FBgn0031183
FBgn0031195
FBgn0031231
FBgn0031247
FBgn0031267
FBgn0031275
FBgn0031284
FBgn0031309
FBgn0031312
FBgn0031317
FBgn0031359
FBgn0031377
FBgn0031378
FBgn0031379
FBgn0031381
FBgn0031403
FBgn0031435
FBgn0031458
FBgn0031491
FBgn0031529
FBgn0031534
FBgn0031600
FBgn0031651
FBgn0031657
FBgn0031676
FBgn0031677
FBgn0031711
FBgn0031719
FBgn0031768
FBgn0031769
FBgn0031818
FBgn0031834
FBgn0031977
FBgn0031987
FBgn0031988
FBgn0032005
FBgn0032014
FBgn0032030
FBgn0032032
FBgn0032052
FBgn0032078
FBgn0032162
FBgn0032197
FBgn0032222
FBgn0032231
FBgn0032236
FBgn0032244
FBgn0032259
FBgn0032293
FBgn0032390
FBgn0032400
FBgn0032420
FBgn0032421
FBgn0032445
FBgn0032465
FBgn0032477
FBgn0032715
FBgn0032750
FBgn0032751
FBgn0032783
FBgn0032790
FBgn0032849
FBgn0032858
FBgn0032871
FBgn0032906
FBgn0032921
FBgn0032943
FBgn0032949
FBgn0032979
FBgn0032987
FBgn0033092
FBgn0033127
FBgn0033177
FBgn0033232
FBgn0033235
FBgn0033241
FBgn0033257
FBgn0033259
FBgn0033341
FBgn0033391
FBgn0033459
FBgn0033468
FBgn0033544
FBgn0033547
FBgn0033550
FBgn0033624
FBgn0033631
FBgn0033639
FBgn0033665
FBgn0033683
FBgn0033699
FBgn0033737
FBgn0033777
FBgn0033784
FBgn0033808
FBgn0033846
FBgn0033871
FBgn0033902
FBgn0033948
FBgn0033979
FBgn0033990
FBgn0033995
FBgn0033998
FBgn0034008
FBgn0034025
FBgn0034059
FBgn0034066
FBgn0034081
FBgn0034091
FBgn0034126
FBgn0034141
FBgn0034184
FBgn0034231
FBgn0034313
FBgn0034398
FBgn0034436
FBgn0034455
FBgn0034535
FBgn0034578
FBgn0034585
FBgn0034626
FBgn0034703
FBgn0034729
FBgn0034743
FBgn0034763
FBgn0034803
FBgn0034804
FBgn0034808
FBgn0034876
FBgn0034918
FBgn0034921
FBgn0034925
FBgn0034946
FBgn0034958
FBgn0035059
FBgn0035065
FBgn0035087
FBgn0035148
FBgn0035169
FBgn0035209
FBgn0035235
FBgn0035266
FBgn0035283
FBgn0035435
FBgn0035444
FBgn0035461
FBgn0035473
FBgn0035475
FBgn0035529
FBgn0035592
FBgn0035639
FBgn0035678
FBgn0035679
FBgn0035713
FBgn0035807
FBgn0035824
FBgn0035848
FBgn0035956
FBgn0035964
FBgn0035965
FBgn0035980
FBgn0035993
FBgn0035998
FBgn0036005
FBgn0036058
FBgn0036107
FBgn0036144
FBgn0036173
FBgn0036239
FBgn0036255
FBgn0036331
FBgn0036335
FBgn0036342
FBgn0036366
FBgn0036405
FBgn0036449
FBgn0036502
FBgn0036581
FBgn0036691
FBgn0036695
FBgn0036777
FBgn0036815
FBgn0036824
FBgn0036847
FBgn0036853
FBgn0036893
FBgn0036906
FBgn0036932
FBgn0036990
FBgn0036998
FBgn0036999
FBgn0037008
FBgn0037009
FBgn0037020
FBgn0037084
FBgn0037110
FBgn0037121
FBgn0037134
FBgn0037200
FBgn0037235
FBgn0037244
FBgn0037261
FBgn0037262
FBgn0037312
FBgn0037313
FBgn0037328
FBgn0037350
FBgn0037481
FBgn0037552
FBgn0037603
FBgn0037609
FBgn0037610
FBgn0037614
FBgn0037634
FBgn0037646
FBgn0037655
FBgn0037664
FBgn0037671
FBgn0037686
FBgn0037719
FBgn0037720
FBgn0037777
FBgn0037779
FBgn0037802
FBgn0037890
FBgn0037922
FBgn0038039
FBgn0038043
FBgn0038099
FBgn0038149
FBgn0038197
FBgn0038206
FBgn0038224
FBgn0038251
FBgn0038307
FBgn0038387
FBgn0038418
FBgn0038421
FBgn0038446
FBgn0038453
FBgn0038524
FBgn0038533
FBgn0038545
FBgn0038608
FBgn0038683
FBgn0038739
FBgn0038755
FBgn0038769
FBgn0038771
FBgn0038828
FBgn0038872
FBgn0038877
FBgn0038903
FBgn0038976
FBgn0038989
FBgn0039044
FBgn0039098
FBgn0039099
FBgn0039132
FBgn0039135
FBgn0039150
FBgn0039153
FBgn0039188
FBgn0039251
FBgn0039280
FBgn0039417
FBgn0039450
FBgn0039459
FBgn0039461
FBgn0039465
FBgn0039561
FBgn0039589
FBgn0039602
FBgn0039642
FBgn0039741
FBgn0039757
FBgn0039830
FBgn0039869
FBgn0039942
FBgn0039969
FBgn0040020
FBgn0040070
FBgn0040080
FBgn0040239
FBgn0040308
FBgn0040339
FBgn0040366
FBgn0040396
FBgn0040477
FBgn0040487
FBgn0040623
FBgn0040751
FBgn0040809
FBgn0040890
FBgn0041585
FBgn0042083
FBgn0042092
FBgn0042125
FBgn0042180
FBgn0043012
FBgn0043364
FBgn0044028
FBgn0045866
FBgn0046214
FBgn0046301
FBgn0047199
FBgn0050022
FBgn0050109
FBgn0050147
FBgn0050381
FBgn0050382
FBgn0051005
FBgn0051122
FBgn0051126
FBgn0051163
FBgn0051249
FBgn0051357
FBgn0051360
FBgn0051363
FBgn0051450
FBgn0051460
FBgn0051866
FBgn0051961
FBgn0052095
FBgn0052425
FBgn0052428
FBgn0052446
FBgn0052479
FBgn0052576
FBgn0052579
FBgn0052640
FBgn0052736
FBgn0052803
FBgn0052850
FBgn0053100
FBgn0053155
FBgn0053199
FBgn0053229
FBgn0053303
FBgn0054001
FBgn0054015
FBgn0058002
FBgn0061198
FBgn0061515
FBgn0063670
FBgn0066114
FBgn0067102
FBgn0067622
FBgn0069242
FBgn0082598
FBgn0083167
FBgn0083952
FBgn0085322
FBgn0085442
FBgn0085444
FBgn0086254
FBgn0086355
FBgn0086370
FBgn0086445
FBgn0086446
FBgn0086655
FBgn0086687
FBgn0086898
FBgn0087040
FBgn0259238
FBgn0259243
FBgn0259933
FBgn0260392
FBgn0260407
FBgn0260659
FBgn0260747
FBgn0260855
FBgn0260859
FBgn0260860
FBgn0260959
FBgn0261067
FBgn0261068
FBgn0261269
FBgn0261373
FBgn0261387
FBgn0261445
FBgn0261722
FBgn0261933
FBgn0262169
FBgn0262511
FBgn0262512
FBgn0262515
FBgn0262732
FBgn0262736
FBgn0262782
FBgn0262975
FBgn0263005
FBgn0263027
FBgn0263050
FBgn0263051
FBgn0263278
FBgn0263602
FBgn0263697
FBgn0263987
FBgn0263993
FBgn0264291
FBgn0264751
FBgn0264979
FBgn0265003
FBgn0265177
FBgn0265193
FBgn0265605
FBgn0265784
FBgn0266411
FBgn0266441
FBgn0266674
FBgn0266724
FBgn0267330
FBgn0267376
FBgn0267728
FBgn0267861
FBgn0267972
FBgn0267975
FBgn0267976
FBgn0283510
FBgn0283521
FBgn0283536
FBgn0284222
FBgn0284249
FBgn0285925
FBgn0285947
FBgn0285950
FBgn0286213

## Sheet: Unique Pum bound genes with PRE
PRE containing Pum Bound Genes
FBgn0000063
FBgn0000077
FBgn0000166
FBgn0000251
FBgn0000384
FBgn0000411
FBgn0000533
FBgn0001124
FBgn0001125
FBgn0001128
FBgn0001142
FBgn0001180
FBgn0001941
FBgn0001977
FBgn0002283
FBgn0002561
FBgn0002566
FBgn0002973
FBgn0003042
FBgn0003165
FBgn0003430
FBgn0003742
FBgn0004394
FBgn0004648
FBgn0004837
FBgn0004889
FBgn0005278
FBgn0005648
FBgn0005671
FBgn0010105
FBgn0010313
FBgn0010315
FBgn0010452
FBgn0010607
FBgn0011300
FBgn0011476
FBgn0011704
FBgn0011705
FBgn0011837
FBgn0013305
FBgn0013325
FBgn0013750
FBgn0013799
FBgn0014010
FBgn0014877
FBgn0015569
FBgn0015602
FBgn0015664
FBgn0015776
FBgn0015791
FBgn0016694
FBgn0016701
FBgn0016970
FBgn0019925
FBgn0020018
FBgn0020224
FBgn0020620
FBgn0020622
FBgn0020910
FBgn0022981
FBgn0023513
FBgn0023527
FBgn0024230
FBgn0024360
FBgn0024889
FBgn0024994
FBgn0026060
FBgn0026634
FBgn0027343
FBgn0027552
FBgn0027615
FBgn0027657
FBgn0028360
FBgn0028397
FBgn0028664
FBgn0028979
FBgn0029093
FBgn0029117
FBgn0029502
FBgn0029854
FBgn0029913
FBgn0029914
FBgn0029929
FBgn0030010
FBgn0030028
FBgn0030039
FBgn0030090
FBgn0030099
FBgn0030109
FBgn0030178
FBgn0030239
FBgn0030420
FBgn0030447
FBgn0030481
FBgn0030482
FBgn0030608
FBgn0030673
FBgn0030693
FBgn0030703
FBgn0030704
FBgn0030710
FBgn0030743
FBgn0030794
FBgn0030868
FBgn0030931
FBgn0030960
FBgn0030964
FBgn0030973
FBgn0030996
FBgn0031036
FBgn0031039
FBgn0031069
FBgn0031091
FBgn0031117
FBgn0031183
FBgn0031195
FBgn0031284
FBgn0031317
FBgn0031359
FBgn0031377
FBgn0031378
FBgn0031379
FBgn0031435
FBgn0031491
FBgn0031534
FBgn0031657
FBgn0031676
FBgn0031677
FBgn0031719
FBgn0031769
FBgn0031818
FBgn0031834
FBgn0031988
FBgn0032078
FBgn0032222
FBgn0032231
FBgn0032259
FBgn0032445
FBgn0032465
FBgn0032715
FBgn0032750
FBgn0032858
FBgn0033092
FBgn0033177
FBgn0033235
FBgn0033257
FBgn0033259
FBgn0033391
FBgn0033459
FBgn0033547
FBgn0033639
FBgn0033665
FBgn0033737
FBgn0033777
FBgn0033784
FBgn0033808
FBgn0033846
FBgn0033871
FBgn0033995
FBgn0034025
FBgn0034059
FBgn0034091
FBgn0034231
FBgn0034313
FBgn0034436
FBgn0034455
FBgn0034535
FBgn0034578
FBgn0034585
FBgn0034763
FBgn0034803
FBgn0034808
FBgn0034876
FBgn0034925
FBgn0034946
FBgn0034958
FBgn0035059
FBgn0035169
FBgn0035235
FBgn0035266
FBgn0035444
FBgn0035461
FBgn0035473
FBgn0035529
FBgn0035639
FBgn0035713
FBgn0035824
FBgn0035848
FBgn0035964
FBgn0035965
FBgn0035998
FBgn0036058
FBgn0036107
FBgn0036144
FBgn0036449
FBgn0036502
FBgn0036581
FBgn0036695
FBgn0036777
FBgn0036906
FBgn0036998
FBgn0037008
FBgn0037009
FBgn0037084
FBgn0037110
FBgn0037134
FBgn0037200
FBgn0037244
FBgn0037261
FBgn0037313
FBgn0037350
FBgn0037552
FBgn0037610
FBgn0037634
FBgn0037646
FBgn0037655
FBgn0037664
FBgn0037720
FBgn0037777
FBgn0037802
FBgn0037922
FBgn0038039
FBgn0038043
FBgn0038099
FBgn0038197
FBgn0038251
FBgn0038307
FBgn0038387
FBgn0038418
FBgn0038421
FBgn0038533
FBgn0038683
FBgn0038739
FBgn0038755
FBgn0038769
FBgn0038771
FBgn0038877
FBgn0038903
FBgn0039044
FBgn0039135
FBgn0039150
FBgn0039153
FBgn0039188
FBgn0039280
FBgn0039417
FBgn0039589
FBgn0039602
FBgn0039741
FBgn0039969
FBgn0040020
FBgn0040239
FBgn0040339
FBgn0040366
FBgn0040487
FBgn0040809
FBgn0040890
FBgn0042092
FBgn0042125
FBgn0042180
FBgn0043012
FBgn0043364
FBgn0044028
FBgn0046301
FBgn0047199
FBgn0050022
FBgn0050147
FBgn0050381
FBgn0051005
FBgn0051122
FBgn0051163
FBgn0051450
FBgn0051460
FBgn0052425
FBgn0052428
FBgn0052479
FBgn0052850
FBgn0053100
FBgn0053229
FBgn0053303
FBgn0058002
FBgn0066114
FBgn0067102
FBgn0083952
FBgn0085322
FBgn0085442
FBgn0085444
FBgn0086370
FBgn0086445
FBgn0086655
FBgn0086898
FBgn0087040
FBgn0259243
FBgn0259933
FBgn0260392
FBgn0260659
FBgn0260855
FBgn0260860
FBgn0260959
FBgn0261269
FBgn0261387
FBgn0261445
FBgn0262169
FBgn0262736
FBgn0262782
FBgn0262975
FBgn0263005
FBgn0263050
FBgn0263051
FBgn0263278
FBgn0263602
FBgn0263697
FBgn0263987
FBgn0263993
FBgn0264751
FBgn0265003
FBgn0265193
FBgn0265605
FBgn0265784
FBgn0266411
FBgn0266441
FBgn0266674
FBgn0267376
FBgn0267728
FBgn0267861
FBgn0267972
FBgn0267975
FBgn0283521
FBgn0284222
FBgn0285947

## Sheet: Bound + Up
Significantly Upregulated Pum Bound mRNAs		Flybase	functions	PRE: 5'UTR	PRE: CDS	PRE: 3'UTR
FBgn0000077	amx	https://flybase.org/reports/FBgn0000077	neurodevelopment, Notch pathway	0	0	2
FBgn0001128	gpdh1	https://flybase.org/reports/FBgn0001128	Glycerol-3-phosphate dehydrogenase 1, metabolism	0	0	2
FBgn0002973	numb	https://flybase.org/reports/FBgn0002973	neurodevelopment, Notch pathway	0	0	1
FBgn0011704	RnrS	https://flybase.org/reports/FBgn0011704	deoxynucleotide biosynthesis, Ribonucleoside diphosphate reductase, small subunit	0	0	1
FBgn0024889	Kap-alpha1	https://flybase.org/reports/FBgn0024889	spermatogenesis, nuclear import, karyopherin	0	0	1
FBgn0024994	Ugalt	https://flybase.org/reports/FBgn0024994	UDP-Galactose transporter	0	0	3
FBgn0028360	cdc7	https://flybase.org/reports/FBgn0028360	promotes DNA replication, protein kinase	0	0	2
FBgn0031491	alpha4GT1	https://flybase.org/reports/FBgn0031491	α1,4-galactosyltransferase 1, glycosphingolipid biosynthesis, phenotype unknown	0	0	1
FBgn0036502	CG7841	https://flybase.org/reports/FBgn0036502	function and phenotype unknown	0	0	2
FBgn0036999	isoQC	http://flybase.org/reports/FBtr0078200.html	iso Glutaminyl cyclase			3NP
FBgn0037110	ORMDL	https://flybase.org/reports/FBgn0037110	Negative regulator of sphingolipid synthesis	0	0	2
FBgn0039135	CG13603	https://flybase.org/reports/FBgn0039135	function and phenotype unknown	0	0	1

## Sheet: Up + Bound + PRE
Upregulated Pum Bound PRE containing mRNAs		Flybase	functions	PRE: 5'UTR	PRE: CDS	PRE: 3'UTR
FBgn0000077	amx	https://flybase.org/reports/FBgn0000077	neurodevelopment, Notch pathway	0	0	2
FBgn0001128	gpdh1	https://flybase.org/reports/FBgn0001128	Glycerol-3-phosphate dehydrogenase 1, metabolism	0	0	2
FBgn0002973	numb	https://flybase.org/reports/FBgn0002973	neurodevelopment, Notch pathway	0	0	1
FBgn0011704	RnrS	https://flybase.org/reports/FBgn0011704	deoxynucleotide biosynthesis, Ribonucleoside diphosphate reductase, small subunit	0	0	1
FBgn0024889	Kap-alpha1	https://flybase.org/reports/FBgn0024889	spermatogenesis, nuclear import, karyopherin	0	0	1
FBgn0024994	Ugalt	https://flybase.org/reports/FBgn0024994	UDP-Galactose transporter	0	0	3
FBgn0028360	cdc7	https://flybase.org/reports/FBgn0028360	promotes DNA replication, protein kinase	0	0	2
FBgn0031491	alpha4GT1	https://flybase.org/reports/FBgn0031491	α1,4-galactosyltransferase 1, glycosphingolipid biosynthesis, phenotype unknown	0	0	1
FBgn0036502	CG7841	https://flybase.org/reports/FBgn0036502	function and phenotype unknown	0	0	2
FBgn0037110	ORMDL	https://flybase.org/reports/FBgn0037110	Negative regulator of sphingolipid synthesis	0	0	2
FBgn0039135	CG13603	https://flybase.org/reports/FBgn0039135	function and phenotype unknown	0	0	1

## Sheet: Gene lists for Figure 3C VENN
Gene Lists for Figure 3C VENN diagram
PRE-containing + Pum bound	Pum RNAi: Up + PRE-containing	Pum RNAi: Up + Pum bound	Pum RNAi: Up + Pum-containing + Pum bound
FBgn0000063	FBgn0011704	FBgn0011704	FBgn0011704
FBgn0000077	FBgn0000180	FBgn0037110	FBgn0037110
FBgn0000251	FBgn0035696	FBgn0000077	FBgn0000077
FBgn0000384	FBgn0034611	FBgn0031491	FBgn0031491
FBgn0001124	FBgn0037110	FBgn0036999	FBgn0028360
FBgn0001125	FBgn0000077	FBgn0028360	FBgn0002973
FBgn0001128	FBgn0283509	FBgn0002973	FBgn0036502
FBgn0001142	FBgn0041629	FBgn0036502	FBgn0024994
FBgn0001180	FBgn0264090	FBgn0024994	FBgn0024889
FBgn0001941	FBgn0031491	FBgn0024889	FBgn0039135
FBgn0001977	FBgn0011288	FBgn0039135	FBgn0001128
FBgn0002283	FBgn0024245	FBgn0001128
FBgn0002566	FBgn0028360
FBgn0002973	FBgn0040334
FBgn0003042	FBgn0010473
FBgn0003165	FBgn0002973
FBgn0003742	FBgn0025626
FBgn0004648	FBgn0036502
FBgn0004837	FBgn0024994
FBgn0004889	FBgn0003079
FBgn0005278	FBgn0024889
FBgn0005648	FBgn0038460
FBgn0005671	FBgn0003716
FBgn0010313	FBgn0040348
FBgn0010315	FBgn0031401
FBgn0010452	FBgn0039135
FBgn0010607	FBgn0034405
FBgn0011300	FBgn0015766
FBgn0011476	FBgn0001128
FBgn0011704	FBgn0039045
FBgn0011705	FBgn0026144
FBgn0011837
FBgn0013305
FBgn0013325
FBgn0013750
FBgn0013799
FBgn0014010
FBgn0014877
FBgn0015569
FBgn0015602
FBgn0015664
FBgn0015776
FBgn0015791
FBgn0016694
FBgn0016701
FBgn0016970
FBgn0019925
FBgn0020018
FBgn0020224
FBgn0020620
FBgn0020622
FBgn0020910
FBgn0023513
FBgn0023527
FBgn0024230
FBgn0024360
FBgn0024889
FBgn0024994
FBgn0026060
FBgn0026634
FBgn0027343
FBgn0027552
FBgn0027615
FBgn0027657
FBgn0028360
FBgn0028397
FBgn0028664
FBgn0029093
FBgn0029117
FBgn0029502
FBgn0029854
FBgn0029913
FBgn0029914
FBgn0029929
FBgn0030010
FBgn0030028
FBgn0030039
FBgn0030090
FBgn0030099
FBgn0030109
FBgn0030178
FBgn0030239
FBgn0030420
FBgn0030447
FBgn0030481
FBgn0030482
FBgn0030608
FBgn0030673
FBgn0030693
FBgn0030703
FBgn0030704
FBgn0030710
FBgn0030743
FBgn0030794
FBgn0030931
FBgn0030960
FBgn0030964
FBgn0030973
FBgn0030996
FBgn0031036
FBgn0031069
FBgn0031091
FBgn0031117
FBgn0031183
FBgn0031195
FBgn0031284
FBgn0031317
FBgn0031359
FBgn0031377
FBgn0031378
FBgn0031379
FBgn0031435
FBgn0031491
FBgn0031534
FBgn0031657
FBgn0031676
FBgn0031677
FBgn0031769
FBgn0031818
FBgn0031834
FBgn0031988
FBgn0032078
FBgn0032222
FBgn0032231
FBgn0032259
FBgn0032445
FBgn0032465
FBgn0032715
FBgn0032750
FBgn0032858
FBgn0033092
FBgn0033177
FBgn0033235
FBgn0033257
FBgn0033259
FBgn0033459
FBgn0033547
FBgn0033639
FBgn0033665
FBgn0033737
FBgn0033777
FBgn0033784
FBgn0033808
FBgn0033846
FBgn0033871
FBgn0033995
FBgn0034025
FBgn0034059
FBgn0034091
FBgn0034231
FBgn0034313
FBgn0034436
FBgn0034455
FBgn0034535
FBgn0034578
FBgn0034585
FBgn0034763
FBgn0034803
FBgn0034876
FBgn0034925
FBgn0034946
FBgn0034958
FBgn0035059
FBgn0035169
FBgn0035235
FBgn0035266
FBgn0035444
FBgn0035461
FBgn0035473
FBgn0035529
FBgn0035639
FBgn0035713
FBgn0035824
FBgn0035848
FBgn0035964
FBgn0035965
FBgn0035998
FBgn0036058
FBgn0036107
FBgn0036144
FBgn0036449
FBgn0036502
FBgn0036581
FBgn0036695
FBgn0036777
FBgn0036906
FBgn0036998
FBgn0037008
FBgn0037009
FBgn0037084
FBgn0037110
FBgn0037134
FBgn0037200
FBgn0037244
FBgn0037261
FBgn0037313
FBgn0037350
FBgn0037552
FBgn0037610
FBgn0037634
FBgn0037646
FBgn0037655
FBgn0037720
FBgn0037777
FBgn0037802
FBgn0037922
FBgn0038039
FBgn0038043
FBgn0038197
FBgn0038251
FBgn0038307
FBgn0038387
FBgn0038418
FBgn0038421
FBgn0038533
FBgn0038683
FBgn0038739
FBgn0038755
FBgn0038769
FBgn0038771
FBgn0038877
FBgn0038903
FBgn0039044
FBgn0039135
FBgn0039150
FBgn0039153
FBgn0039188
FBgn0039417
FBgn0039589
FBgn0039602
FBgn0039741
FBgn0039969
FBgn0040020
FBgn0040239
FBgn0040339
FBgn0040366
FBgn0040487
FBgn0040890
FBgn0042092
FBgn0042125
FBgn0042180
FBgn0043012
FBgn0043364
FBgn0044028
FBgn0046301
FBgn0050022
FBgn0050147
FBgn0050381
FBgn0051005
FBgn0051122
FBgn0051163
FBgn0051450
FBgn0051460
FBgn0052425
FBgn0052428
FBgn0052479
FBgn0052850
FBgn0053100
FBgn0053229
FBgn0053303
FBgn0058002
FBgn0066114
FBgn0067102
FBgn0083952
FBgn0085322
FBgn0085442
FBgn0085444
FBgn0086370
FBgn0086445
FBgn0086655
FBgn0086898
FBgn0259243
FBgn0260659
FBgn0260855
FBgn0260860
FBgn0260959
FBgn0261269
FBgn0261387
FBgn0261445
FBgn0262169
FBgn0262736
FBgn0262782
FBgn0262975
FBgn0263005
FBgn0263278
FBgn0263602
FBgn0263697
FBgn0263987
FBgn0263993
FBgn0264751
FBgn0265003
FBgn0265193
FBgn0265605
FBgn0265784
FBgn0266411
FBgn0266441
FBgn0266674
FBgn0267376
FBgn0267728
FBgn0267861
FBgn0267972
FBgn0267975
FBgn0283521
FBgn0285947

## Sheet: Expressed genes DL1 and Embryo
Embryo expressed genes	DL1 expressed genes	Overlapp of expressed genes in Embryos and DL1 cells
FBgn0000008	FBgn0000008	FBgn0000008
FBgn0000014	FBgn0000017	FBgn0000017
FBgn0000017	FBgn0000018	FBgn0000018
FBgn0000018	FBgn0000028	FBgn0000032
FBgn0000022	FBgn0000032	FBgn0000042
FBgn0000032	FBgn0000042	FBgn0000043
FBgn0000042	FBgn0000043	FBgn0000044
FBgn0000043	FBgn0000044	FBgn0000046
FBgn0000044	FBgn0000045	FBgn0000052
FBgn0000046	FBgn0000046	FBgn0000053
FBgn0000052	FBgn0000047	FBgn0000057
FBgn0000053	FBgn0000052	FBgn0000063
FBgn0000055	FBgn0000053	FBgn0000064
FBgn0000056	FBgn0000057	FBgn0000077
FBgn0000057	FBgn0000063	FBgn0000083
FBgn0000063	FBgn0000064	FBgn0000084
FBgn0000064	FBgn0000077	FBgn0000097
FBgn0000071	FBgn0000078	FBgn0000108
FBgn0000075	FBgn0000079	FBgn0000109
FBgn0000077	FBgn0000083	FBgn0000114
FBgn0000083	FBgn0000084	FBgn0000115
FBgn0000084	FBgn0000092	FBgn0000116
FBgn0000097	FBgn0000097	FBgn0000117
FBgn0000100	FBgn0000108	FBgn0000119
FBgn0000108	FBgn0000109	FBgn0000139
FBgn0000109	FBgn0000114	FBgn0000140
FBgn0000114	FBgn0000115	FBgn0000146
FBgn0000115	FBgn0000116	FBgn0000147
FBgn0000116	FBgn0000117	FBgn0000150
FBgn0000117	FBgn0000119	FBgn0000152
FBgn0000119	FBgn0000139	FBgn0000157
FBgn0000139	FBgn0000140	FBgn0000163
FBgn0000140	FBgn0000146	FBgn0000173
FBgn0000146	FBgn0000147	FBgn0000180
FBgn0000147	FBgn0000150	FBgn0000181
FBgn0000150	FBgn0000152	FBgn0000183
FBgn0000152	FBgn0000157	FBgn0000212
FBgn0000157	FBgn0000163	FBgn0000221
FBgn0000158	FBgn0000173	FBgn0000228
FBgn0000163	FBgn0000180	FBgn0000229
FBgn0000166	FBgn0000181	FBgn0000239
FBgn0000173	FBgn0000183	FBgn0000244
FBgn0000180	FBgn0000212	FBgn0000246
FBgn0000181	FBgn0000221	FBgn0000247
FBgn0000182	FBgn0000228	FBgn0000250
FBgn0000183	FBgn0000229	FBgn0000251
FBgn0000212	FBgn0000239	FBgn0000256
FBgn0000216	FBgn0000244	FBgn0000257
FBgn0000221	FBgn0000246	FBgn0000259
FBgn0000227	FBgn0000247	FBgn0000261
FBgn0000228	FBgn0000250	FBgn0000273
FBgn0000229	FBgn0000251	FBgn0000283
FBgn0000233	FBgn0000256	FBgn0000286
FBgn0000239	FBgn0000257	FBgn0000289
FBgn0000244	FBgn0000259	FBgn0000307
FBgn0000246	FBgn0000261	FBgn0000308
FBgn0000247	FBgn0000273	FBgn0000316
FBgn0000250	FBgn0000279	FBgn0000317
FBgn0000251	FBgn0000283	FBgn0000318
FBgn0000253	FBgn0000286	FBgn0000319
FBgn0000256	FBgn0000289	FBgn0000326
FBgn0000257	FBgn0000299	FBgn0000330
FBgn0000259	FBgn0000307	FBgn0000339
FBgn0000261	FBgn0000308	FBgn0000346
FBgn0000273	FBgn0000316	FBgn0000351
FBgn0000274	FBgn0000317	FBgn0000352
FBgn0000283	FBgn0000318	FBgn0000370
FBgn0000286	FBgn0000319	FBgn0000376
FBgn0000289	FBgn0000320	FBgn0000377
FBgn0000307	FBgn0000326	FBgn0000382
FBgn0000308	FBgn0000330	FBgn0000384
FBgn0000316	FBgn0000339	FBgn0000394
FBgn0000317	FBgn0000346	FBgn0000395
FBgn0000318	FBgn0000351	FBgn0000404
FBgn0000319	FBgn0000352	FBgn0000405
FBgn0000326	FBgn0000370	FBgn0000412
FBgn0000330	FBgn0000376	FBgn0000414
FBgn0000339	FBgn0000377	FBgn0000416
FBgn0000346	FBgn0000382	FBgn0000426
FBgn0000351	FBgn0000384	FBgn0000447
FBgn0000352	FBgn0000394	FBgn0000454
FBgn0000370	FBgn0000395	FBgn0000455
FBgn0000376	FBgn0000404	FBgn0000459
FBgn0000377	FBgn0000405	FBgn0000463
FBgn0000382	FBgn0000412	FBgn0000464
FBgn0000384	FBgn0000414	FBgn0000482
FBgn0000392	FBgn0000416	FBgn0000489
FBgn0000394	FBgn0000422	FBgn0000490
FBgn0000395	FBgn0000426	FBgn0000492
FBgn0000404	FBgn0000427	FBgn0000499
FBgn0000405	FBgn0000447	FBgn0000520
FBgn0000411	FBgn0000454	FBgn0000524
FBgn0000412	FBgn0000455	FBgn0000536
FBgn0000414	FBgn0000459	FBgn0000541
FBgn0000416	FBgn0000463	FBgn0000542
FBgn0000426	FBgn0000464	FBgn0000543
FBgn0000439	FBgn0000482	FBgn0000546
FBgn0000447	FBgn0000489	FBgn0000547
FBgn0000448	FBgn0000490	FBgn0000559
FBgn0000449	FBgn0000492	FBgn0000562
FBgn0000454	FBgn0000499	FBgn0000565
FBgn0000455	FBgn0000504	FBgn0000566
FBgn0000459	FBgn0000520	FBgn0000568
FBgn0000463	FBgn0000524	FBgn0000575
FBgn0000464	FBgn0000535	FBgn0000577
FBgn0000479	FBgn0000536	FBgn0000578
FBgn0000482	FBgn0000541	FBgn0000579
FBgn0000489	FBgn0000542	FBgn0000581
FBgn0000490	FBgn0000543	FBgn0000588
FBgn0000492	FBgn0000546	FBgn0000611
FBgn0000499	FBgn0000547	FBgn0000615
FBgn0000520	FBgn0000557	FBgn0000617
FBgn0000524	FBgn0000559	FBgn0000618
FBgn0000533	FBgn0000560	FBgn0000629
FBgn0000536	FBgn0000562	FBgn0000658
FBgn0000541	FBgn0000565	FBgn0000662
FBgn0000542	FBgn0000566	FBgn0000667
FBgn0000543	FBgn0000567	FBgn0000709
FBgn0000546	FBgn0000568	FBgn0000711
FBgn0000547	FBgn0000575	FBgn0000719
FBgn0000559	FBgn0000577	FBgn0000721
FBgn0000562	FBgn0000578	FBgn0000723
FBgn0000565	FBgn0000579	FBgn0000808
FBgn0000566	FBgn0000581	FBgn0000810
FBgn0000568	FBgn0000588	FBgn0000826
FBgn0000575	FBgn0000611	FBgn0000927
FBgn0000576	FBgn0000615	FBgn0000928
FBgn0000577	FBgn0000617	FBgn0000996
FBgn0000578	FBgn0000618	FBgn0001075
FBgn0000579	FBgn0000629	FBgn0001078
FBgn0000581	FBgn0000633	FBgn0001079
FBgn0000588	FBgn0000635	FBgn0001084
FBgn0000591	FBgn0000636	FBgn0001085
FBgn0000606	FBgn0000658	FBgn0001086
FBgn0000611	FBgn0000662	FBgn0001087
FBgn0000615	FBgn0000667	FBgn0001090
FBgn0000617	FBgn0000709	FBgn0001091
FBgn0000618	FBgn0000711	FBgn0001092
FBgn0000629	FBgn0000719	FBgn0001098
FBgn0000658	FBgn0000721	FBgn0001104
FBgn0000659	FBgn0000723	FBgn0001105
FBgn0000662	FBgn0000808	FBgn0001108
FBgn0000667	FBgn0000810	FBgn0001120
FBgn0000709	FBgn0000826	FBgn0001122
FBgn0000711	FBgn0000927	FBgn0001123
FBgn0000719	FBgn0000928	FBgn0001124
FBgn0000721	FBgn0000964	FBgn0001125
FBgn0000723	FBgn0000996	FBgn0001128
FBgn0000808	FBgn0001075	FBgn0001133
FBgn0000810	FBgn0001078	FBgn0001137
FBgn0000826	FBgn0001079	FBgn0001139
FBgn0000927	FBgn0001084	FBgn0001142
FBgn0000928	FBgn0001085	FBgn0001149
FBgn0000996	FBgn0001086	FBgn0001150
FBgn0001075	FBgn0001087	FBgn0001168
FBgn0001077	FBgn0001090	FBgn0001169
FBgn0001078	FBgn0001091	FBgn0001179
FBgn0001079	FBgn0001092	FBgn0001180
FBgn0001084	FBgn0001098	FBgn0001185
FBgn0001085	FBgn0001104	FBgn0001186
FBgn0001086	FBgn0001105	FBgn0001189
FBgn0001087	FBgn0001108	FBgn0001197
FBgn0001090	FBgn0001114	FBgn0001202
FBgn0001091	FBgn0001120	FBgn0001206
FBgn0001092	FBgn0001122	FBgn0001215
FBgn0001098	FBgn0001123	FBgn0001218
FBgn0001099	FBgn0001124	FBgn0001220
FBgn0001104	FBgn0001125	FBgn0001222
FBgn0001105	FBgn0001128	FBgn0001224
FBgn0001108	FBgn0001133	FBgn0001225
FBgn0001120	FBgn0001137	FBgn0001226
FBgn0001122	FBgn0001139	FBgn0001230
FBgn0001123	FBgn0001142	FBgn0001233
FBgn0001124	FBgn0001145	FBgn0001235
FBgn0001125	FBgn0001149	FBgn0001247
FBgn0001128	FBgn0001150	FBgn0001248
FBgn0001133	FBgn0001168	FBgn0001255
FBgn0001137	FBgn0001169	FBgn0001257
FBgn0001138	FBgn0001179	FBgn0001258
FBgn0001139	FBgn0001180	FBgn0001276
FBgn0001142	FBgn0001185	FBgn0001280
FBgn0001148	FBgn0001186	FBgn0001291
FBgn0001149	FBgn0001189	FBgn0001297
FBgn0001150	FBgn0001197	FBgn0001301
FBgn0001168	FBgn0001202	FBgn0001308
FBgn0001169	FBgn0001206	FBgn0001316
FBgn0001174	FBgn0001215	FBgn0001324
FBgn0001179	FBgn0001217	FBgn0001330
FBgn0001180	FBgn0001218	FBgn0001341
FBgn0001185	FBgn0001220	FBgn0001404
FBgn0001186	FBgn0001222	FBgn0001491
FBgn0001189	FBgn0001224	FBgn0001565
FBgn0001197	FBgn0001225	FBgn0001612
FBgn0001202	FBgn0001226	FBgn0001624
FBgn0001206	FBgn0001227	FBgn0001941
FBgn0001215	FBgn0001230	FBgn0001942
FBgn0001218	FBgn0001233	FBgn0001961
FBgn0001220	FBgn0001234	FBgn0001965
FBgn0001222	FBgn0001235	FBgn0001970
FBgn0001223	FBgn0001247	FBgn0001977
FBgn0001224	FBgn0001248	FBgn0001978
FBgn0001225	FBgn0001253	FBgn0001981
FBgn0001226	FBgn0001255	FBgn0001983
FBgn0001230	FBgn0001257	FBgn0001986
FBgn0001233	FBgn0001258	FBgn0001987
FBgn0001235	FBgn0001276	FBgn0001989
FBgn0001247	FBgn0001280	FBgn0001990
FBgn0001248	FBgn0001291	FBgn0001994
FBgn0001250	FBgn0001296	FBgn0001995
FBgn0001255	FBgn0001297	FBgn0002021
FBgn0001257	FBgn0001301	FBgn0002022
FBgn0001258	FBgn0001308	FBgn0002031
FBgn0001276	FBgn0001311	FBgn0002036
FBgn0001280	FBgn0001316	FBgn0002044
FBgn0001291	FBgn0001321	FBgn0002069
FBgn0001297	FBgn0001324	FBgn0002121
FBgn0001301	FBgn0001330	FBgn0002174
FBgn0001308	FBgn0001341	FBgn0002183
FBgn0001316	FBgn0001404	FBgn0002283
FBgn0001320	FBgn0001491	FBgn0002284
FBgn0001323	FBgn0001565	FBgn0002354
FBgn0001324	FBgn0001612	FBgn0002413
FBgn0001325	FBgn0001624	FBgn0002431
FBgn0001330	FBgn0001941	FBgn0002441
FBgn0001341	FBgn0001942	FBgn0002466
FBgn0001404	FBgn0001961	FBgn0002521
FBgn0001491	FBgn0001965	FBgn0002524
FBgn0001565	FBgn0001967	FBgn0002525
FBgn0001612	FBgn0001970	FBgn0002526
FBgn0001624	FBgn0001977	FBgn0002542
FBgn0001941	FBgn0001978	FBgn0002543
FBgn0001942	FBgn0001981	FBgn0002552
FBgn0001961	FBgn0001983	FBgn0002566
FBgn0001965	FBgn0001986	FBgn0002567
FBgn0001970	FBgn0001987	FBgn0002579
FBgn0001977	FBgn0001989	FBgn0002590
FBgn0001978	FBgn0001990	FBgn0002593
FBgn0001981	FBgn0001991	FBgn0002622
FBgn0001983	FBgn0001994	FBgn0002626
FBgn0001986	FBgn0001995	FBgn0002633
FBgn0001987	FBgn0002021	FBgn0002638
FBgn0001989	FBgn0002022	FBgn0002641
FBgn0001990	FBgn0002031	FBgn0002643
FBgn0001994	FBgn0002036	FBgn0002645
FBgn0001995	FBgn0002044	FBgn0002673
FBgn0002021	FBgn0002069	FBgn0002707
FBgn0002022	FBgn0002121	FBgn0002709
FBgn0002031	FBgn0002174	FBgn0002715
FBgn0002036	FBgn0002183	FBgn0002716
FBgn0002044	FBgn0002283	FBgn0002719
FBgn0002069	FBgn0002284	FBgn0002723
FBgn0002121	FBgn0002354	FBgn0002735
FBgn0002174	FBgn0002413	FBgn0002736
FBgn0002183	FBgn0002431	FBgn0002773
FBgn0002283	FBgn0002441	FBgn0002774
FBgn0002284	FBgn0002466	FBgn0002775
FBgn0002354	FBgn0002521	FBgn0002778
FBgn0002413	FBgn0002524	FBgn0002780
FBgn0002431	FBgn0002525	FBgn0002781
FBgn0002441	FBgn0002526	FBgn0002783
FBgn0002466	FBgn0002542	FBgn0002787
FBgn0002521	FBgn0002543	FBgn0002791
FBgn0002524	FBgn0002552	FBgn0002872
FBgn0002525	FBgn0002564	FBgn0002873
FBgn0002526	FBgn0002566	FBgn0002878
FBgn0002542	FBgn0002567	FBgn0002887
FBgn0002543	FBgn0002576	FBgn0002891
FBgn0002552	FBgn0002579	FBgn0002899
FBgn0002561	FBgn0002590	FBgn0002901
FBgn0002566	FBgn0002592	FBgn0002905
FBgn0002567	FBgn0002593	FBgn0002906
FBgn0002577	FBgn0002609	FBgn0002921
FBgn0002579	FBgn0002622	FBgn0002924
FBgn0002590	FBgn0002626	FBgn0002931
FBgn0002593	FBgn0002633	FBgn0002932
FBgn0002622	FBgn0002638	FBgn0002945
FBgn0002626	FBgn0002641	FBgn0002948
FBgn0002629	FBgn0002643	FBgn0002973
FBgn0002631	FBgn0002645	FBgn0002985
FBgn0002633	FBgn0002673	FBgn0002989
FBgn0002638	FBgn0002707	FBgn0003008
FBgn0002641	FBgn0002709	FBgn0003016
FBgn0002643	FBgn0002715	FBgn0003023
FBgn0002645	FBgn0002716	FBgn0003041
FBgn0002673	FBgn0002719	FBgn0003042
FBgn0002707	FBgn0002723	FBgn0003044
FBgn0002709	FBgn0002733	FBgn0003048
FBgn0002715	FBgn0002734	FBgn0003053
FBgn0002716	FBgn0002735	FBgn0003062
FBgn0002719	FBgn0002736	FBgn0003071
FBgn0002723	FBgn0002773	FBgn0003074
FBgn0002732	FBgn0002774	FBgn0003076
FBgn0002735	FBgn0002775	FBgn0003079
FBgn0002736	FBgn0002778	FBgn0003082
FBgn0002772	FBgn0002780	FBgn0003087
FBgn0002773	FBgn0002781	FBgn0003093
FBgn0002774	FBgn0002783	FBgn0003116
FBgn0002775	FBgn0002787	FBgn0003117
FBgn0002778	FBgn0002789	FBgn0003118
FBgn0002780	FBgn0002791	FBgn0003124
FBgn0002781	FBgn0002868	FBgn0003134
FBgn0002783	FBgn0002872	FBgn0003139
FBgn0002787	FBgn0002873	FBgn0003141
FBgn0002791	FBgn0002878	FBgn0003159
FBgn0002872	FBgn0002887	FBgn0003165
FBgn0002873	FBgn0002891	FBgn0003169
FBgn0002878	FBgn0002899	FBgn0003175
FBgn0002887	FBgn0002901	FBgn0003189
FBgn0002891	FBgn0002905	FBgn0003204
FBgn0002899	FBgn0002906	FBgn0003205
FBgn0002901	FBgn0002921	FBgn0003206
FBgn0002905	FBgn0002924	FBgn0003209
FBgn0002906	FBgn0002930	FBgn0003210
FBgn0002914	FBgn0002931	FBgn0003218
FBgn0002921	FBgn0002932	FBgn0003227
FBgn0002924	FBgn0002945	FBgn0003231
FBgn0002931	FBgn0002948	FBgn0003254
FBgn0002932	FBgn0002973	FBgn0003256
FBgn0002945	FBgn0002985	FBgn0003257
FBgn0002948	FBgn0002989	FBgn0003261
FBgn0002962	FBgn0003008	FBgn0003268
FBgn0002973	FBgn0003016	FBgn0003274
FBgn0002985	FBgn0003023	FBgn0003275
FBgn0002989	FBgn0003041	FBgn0003277
FBgn0003002	FBgn0003042	FBgn0003278
FBgn0003008	FBgn0003044	FBgn0003279
FBgn0003015	FBgn0003048	FBgn0003285
FBgn0003016	FBgn0003053	FBgn0003301
FBgn0003023	FBgn0003062	FBgn0003302
FBgn0003028	FBgn0003065	FBgn0003308
FBgn0003041	FBgn0003068	FBgn0003310
FBgn0003042	FBgn0003071	FBgn0003317
FBgn0003044	FBgn0003074	FBgn0003321
FBgn0003048	FBgn0003076	FBgn0003326
FBgn0003053	FBgn0003079	FBgn0003330
FBgn0003062	FBgn0003082	FBgn0003334
FBgn0003067	FBgn0003087	FBgn0003345
FBgn0003071	FBgn0003090	FBgn0003346
FBgn0003074	FBgn0003093	FBgn0003353
FBgn0003076	FBgn0003116	FBgn0003360
FBgn0003079	FBgn0003117	FBgn0003371
FBgn0003082	FBgn0003118	FBgn0003391
FBgn0003087	FBgn0003124	FBgn0003392
FBgn0003093	FBgn0003134	FBgn0003396
FBgn0003114	FBgn0003137	FBgn0003401
FBgn0003116	FBgn0003139	FBgn0003410
FBgn0003117	FBgn0003141	FBgn0003415
FBgn0003118	FBgn0003159	FBgn0003416
FBgn0003124	FBgn0003162	FBgn0003423
FBgn0003134	FBgn0003165	FBgn0003435
FBgn0003139	FBgn0003169	FBgn0003444
FBgn0003141	FBgn0003174	FBgn0003447
FBgn0003145	FBgn0003175	FBgn0003449
FBgn0003159	FBgn0003189	FBgn0003459
FBgn0003165	FBgn0003204	FBgn0003462
FBgn0003169	FBgn0003205	FBgn0003463
FBgn0003175	FBgn0003206	FBgn0003464
FBgn0003187	FBgn0003209	FBgn0003475
FBgn0003189	FBgn0003210	FBgn0003479
FBgn0003204	FBgn0003218	FBgn0003480
FBgn0003205	FBgn0003227	FBgn0003482
FBgn0003206	FBgn0003231	FBgn0003483
FBgn0003209	FBgn0003254	FBgn0003486
FBgn0003210	FBgn0003255	FBgn0003495
FBgn0003218	FBgn0003256	FBgn0003502
FBgn0003227	FBgn0003257	FBgn0003507
FBgn0003231	FBgn0003261	FBgn0003512
FBgn0003254	FBgn0003268	FBgn0003514
FBgn0003256	FBgn0003274	FBgn0003517
FBgn0003257	FBgn0003275	FBgn0003520
FBgn0003261	FBgn0003277	FBgn0003525
FBgn0003268	FBgn0003278	FBgn0003545
FBgn0003270	FBgn0003279	FBgn0003557
FBgn0003274	FBgn0003285	FBgn0003559
FBgn0003275	FBgn0003301	FBgn0003567
FBgn0003277	FBgn0003302	FBgn0003575
FBgn0003278	FBgn0003308	FBgn0003598
FBgn0003279	FBgn0003310	FBgn0003607
FBgn0003285	FBgn0003317	FBgn0003612
FBgn0003292	FBgn0003321	FBgn0003638
FBgn0003300	FBgn0003326	FBgn0003654
FBgn0003301	FBgn0003330	FBgn0003655
FBgn0003302	FBgn0003334	FBgn0003656
FBgn0003308	FBgn0003345	FBgn0003660
FBgn0003310	FBgn0003346	FBgn0003676
FBgn0003312	FBgn0003353	FBgn0003687
FBgn0003313	FBgn0003360	FBgn0003701
FBgn0003317	FBgn0003371	FBgn0003714
FBgn0003321	FBgn0003372	FBgn0003716
FBgn0003326	FBgn0003380	FBgn0003721
FBgn0003328	FBgn0003386	FBgn0003731
FBgn0003330	FBgn0003390	FBgn0003741
FBgn0003334	FBgn0003391	FBgn0003742
FBgn0003345	FBgn0003392	FBgn0003744
FBgn0003346	FBgn0003396	FBgn0003748
FBgn0003353	FBgn0003401	FBgn0003751
FBgn0003360	FBgn0003410	FBgn0003862
FBgn0003371	FBgn0003415	FBgn0003866
FBgn0003391	FBgn0003416	FBgn0003870
FBgn0003392	FBgn0003423	FBgn0003882
FBgn0003396	FBgn0003435	FBgn0003884
FBgn0003401	FBgn0003444	FBgn0003885
FBgn0003410	FBgn0003447	FBgn0003888
FBgn0003411	FBgn0003449	FBgn0003891
FBgn0003415	FBgn0003459	FBgn0003892
FBgn0003416	FBgn0003460	FBgn0003896
FBgn0003423	FBgn0003462	FBgn0003941
FBgn0003430	FBgn0003463	FBgn0003942
FBgn0003435	FBgn0003464	FBgn0003943
FBgn0003444	FBgn0003475	FBgn0003950
FBgn0003447	FBgn0003479	FBgn0003963
FBgn0003448	FBgn0003480	FBgn0003964
FBgn0003449	FBgn0003482	FBgn0003969
FBgn0003450	FBgn0003483	FBgn0003977
FBgn0003459	FBgn0003486	FBgn0003978
FBgn0003462	FBgn0003495	FBgn0003984
FBgn0003463	FBgn0003499	FBgn0003997
FBgn0003464	FBgn0003502	FBgn0004049
FBgn0003475	FBgn0003507	FBgn0004050
FBgn0003479	FBgn0003512	FBgn0004055
FBgn0003480	FBgn0003513	FBgn0004057
FBgn0003482	FBgn0003514	FBgn0004066
FBgn0003483	FBgn0003517	FBgn0004087
FBgn0003486	FBgn0003520	FBgn0004101
FBgn0003495	FBgn0003525	FBgn0004103
FBgn0003502	FBgn0003545	FBgn0004106
FBgn0003507	FBgn0003557	FBgn0004107
FBgn0003510	FBgn0003559	FBgn0004108
FBgn0003511	FBgn0003567	FBgn0004132
FBgn0003512	FBgn0003575	FBgn0004167
FBgn0003514	FBgn0003598	FBgn0004177
FBgn0003517	FBgn0003607	FBgn0004179
FBgn0003520	FBgn0003612	FBgn0004227
FBgn0003525	FBgn0003638	FBgn0004237
FBgn0003527	FBgn0003654	FBgn0004359
FBgn0003545	FBgn0003655	FBgn0004362
FBgn0003557	FBgn0003656	FBgn0004363
FBgn0003559	FBgn0003660	FBgn0004364
FBgn0003567	FBgn0003676	FBgn0004367
FBgn0003575	FBgn0003687	FBgn0004368
FBgn0003598	FBgn0003701	FBgn0004369
FBgn0003607	FBgn0003714	FBgn0004370
FBgn0003612	FBgn0003716	FBgn0004373
FBgn0003638	FBgn0003721	FBgn0004374
FBgn0003654	FBgn0003731	FBgn0004378
FBgn0003655	FBgn0003741	FBgn0004379
FBgn0003656	FBgn0003742	FBgn0004380
FBgn0003660	FBgn0003744	FBgn0004381
FBgn0003676	FBgn0003748	FBgn0004387
FBgn0003683	FBgn0003751	FBgn0004390
FBgn0003687	FBgn0003862	FBgn0004391
FBgn0003701	FBgn0003866	FBgn0004395
FBgn0003714	FBgn0003870	FBgn0004396
FBgn0003716	FBgn0003882	FBgn0004397
FBgn0003719	FBgn0003884	FBgn0004401
FBgn0003720	FBgn0003885	FBgn0004403
FBgn0003721	FBgn0003886	FBgn0004404
FBgn0003731	FBgn0003888	FBgn0004406
FBgn0003733	FBgn0003890	FBgn0004419
FBgn0003741	FBgn0003891	FBgn0004432
FBgn0003742	FBgn0003892	FBgn0004435
FBgn0003744	FBgn0003896	FBgn0004436
FBgn0003748	FBgn0003941	FBgn0004449
FBgn0003751	FBgn0003942	FBgn0004456
FBgn0003862	FBgn0003943	FBgn0004463
FBgn0003865	FBgn0003950	FBgn0004465
FBgn0003866	FBgn0003963	FBgn0004507
FBgn0003870	FBgn0003964	FBgn0004509
FBgn0003882	FBgn0003969	FBgn0004510
FBgn0003884	FBgn0003977	FBgn0004512
FBgn0003885	FBgn0003978	FBgn0004556
FBgn0003888	FBgn0003984	FBgn0004569
FBgn0003891	FBgn0003997	FBgn0004574
FBgn0003892	FBgn0004034	FBgn0004583
FBgn0003896	FBgn0004049	FBgn0004584
FBgn0003900	FBgn0004050	FBgn0004587
FBgn0003941	FBgn0004055	FBgn0004595
FBgn0003942	FBgn0004057	FBgn0004597
FBgn0003943	FBgn0004066	FBgn0004598
FBgn0003950	FBgn0004087	FBgn0004606
FBgn0003963	FBgn0004101	FBgn0004607
FBgn0003964	FBgn0004103	FBgn0004611
FBgn0003969	FBgn0004106	FBgn0004629
FBgn0003977	FBgn0004107	FBgn0004635
FBgn0003978	FBgn0004108	FBgn0004636
FBgn0003984	FBgn0004118	FBgn0004638
FBgn0003996	FBgn0004132	FBgn0004643
FBgn0003997	FBgn0004133	FBgn0004644
FBgn0004049	FBgn0004167	FBgn0004646
FBgn0004050	FBgn0004177	FBgn0004647
FBgn0004052	FBgn0004179	FBgn0004648
FBgn0004053	FBgn0004197	FBgn0004650
FBgn0004054	FBgn0004198	FBgn0004654
FBgn0004055	FBgn0004227	FBgn0004655
FBgn0004057	FBgn0004237	FBgn0004656
FBgn0004066	FBgn0004359	FBgn0004657
FBgn0004087	FBgn0004360	FBgn0004687
FBgn0004101	FBgn0004362	FBgn0004698
FBgn0004102	FBgn0004363	FBgn0004795
FBgn0004103	FBgn0004364	FBgn0004797
FBgn0004106	FBgn0004367	FBgn0004811
FBgn0004107	FBgn0004368	FBgn0004828
FBgn0004108	FBgn0004369	FBgn0004832
FBgn0004110	FBgn0004370	FBgn0004837
FBgn0004132	FBgn0004373	FBgn0004838
FBgn0004143	FBgn0004374	FBgn0004839
FBgn0004167	FBgn0004378	FBgn0004855
FBgn0004170	FBgn0004379	FBgn0004856
FBgn0004177	FBgn0004380	FBgn0004859
FBgn0004179	FBgn0004381	FBgn0004860
FBgn0004227	FBgn0004387	FBgn0004861
FBgn0004237	FBgn0004390	FBgn0004864
FBgn0004359	FBgn0004391	FBgn0004867
FBgn0004362	FBgn0004395	FBgn0004868
FBgn0004363	FBgn0004396	FBgn0004872
FBgn0004364	FBgn0004397	FBgn0004875
FBgn0004367	FBgn0004401	FBgn0004876
FBgn0004368	FBgn0004403	FBgn0004878
FBgn0004369	FBgn0004404	FBgn0004882
FBgn0004370	FBgn0004406	FBgn0004888
FBgn0004373	FBgn0004419	FBgn0004889
FBgn0004374	FBgn0004432	FBgn0004893
FBgn0004378	FBgn0004435	FBgn0004901
FBgn0004379	FBgn0004436	FBgn0004903
FBgn0004380	FBgn0004449	FBgn0004907
FBgn0004381	FBgn0004456	FBgn0004908
FBgn0004387	FBgn0004463	FBgn0004913
FBgn0004389	FBgn0004465	FBgn0004914
FBgn0004390	FBgn0004507	FBgn0004915
FBgn0004391	FBgn0004509	FBgn0004921
FBgn0004394	FBgn0004510	FBgn0004924
FBgn0004395	FBgn0004511	FBgn0004926
FBgn0004396	FBgn0004512	FBgn0004956
FBgn0004397	FBgn0004513	FBgn0004957
FBgn0004400	FBgn0004516	FBgn0005198
FBgn0004401	FBgn0004556	FBgn0005278
FBgn0004403	FBgn0004569	FBgn0005322
FBgn0004404	FBgn0004573	FBgn0005355
FBgn0004406	FBgn0004574	FBgn0005386
FBgn0004419	FBgn0004575	FBgn0005411
FBgn0004432	FBgn0004581	FBgn0005427
FBgn0004435	FBgn0004583	FBgn0005533
FBgn0004436	FBgn0004584	FBgn0005536
FBgn0004449	FBgn0004587	FBgn0005564
FBgn0004456	FBgn0004595	FBgn0005585
FBgn0004463	FBgn0004597	FBgn0005593
FBgn0004465	FBgn0004598	FBgn0005596
FBgn0004507	FBgn0004606	FBgn0005616
FBgn0004509	FBgn0004607	FBgn0005617
FBgn0004510	FBgn0004611	FBgn0005624
FBgn0004512	FBgn0004620	FBgn0005631
FBgn0004556	FBgn0004629	FBgn0005632
FBgn0004567	FBgn0004635	FBgn0005636
FBgn0004569	FBgn0004636	FBgn0005640
FBgn0004574	FBgn0004638	FBgn0005642
FBgn0004583	FBgn0004643	FBgn0005648
FBgn0004584	FBgn0004644	FBgn0005649
FBgn0004587	FBgn0004646	FBgn0005655
FBgn0004595	FBgn0004647	FBgn0005671
FBgn0004597	FBgn0004648	FBgn0005672
FBgn0004598	FBgn0004650	FBgn0005674
FBgn0004606	FBgn0004652	FBgn0005683
FBgn0004607	FBgn0004654	FBgn0005694
FBgn0004611	FBgn0004655	FBgn0005695
FBgn0004629	FBgn0004656	FBgn0005696
FBgn0004635	FBgn0004657	FBgn0005771
FBgn0004636	FBgn0004687	FBgn0005777
FBgn0004638	FBgn0004698	FBgn0008635
FBgn0004643	FBgn0004795	FBgn0010038
FBgn0004644	FBgn0004797	FBgn0010039
FBgn0004646	FBgn0004811	FBgn0010051
FBgn0004647	FBgn0004828	FBgn0010053
FBgn0004648	FBgn0004832	FBgn0010078
FBgn0004649	FBgn0004837	FBgn0010097
FBgn0004650	FBgn0004838	FBgn0010100
FBgn0004654	FBgn0004839	FBgn0010109
FBgn0004655	FBgn0004852	FBgn0010113
FBgn0004656	FBgn0004855	FBgn0010173
FBgn0004657	FBgn0004856	FBgn0010194
FBgn0004666	FBgn0004858	FBgn0010198
FBgn0004687	FBgn0004859	FBgn0010213
FBgn0004698	FBgn0004860	FBgn0010215
FBgn0004795	FBgn0004861	FBgn0010217
FBgn0004797	FBgn0004864	FBgn0010220
FBgn0004811	FBgn0004865	FBgn0010222
FBgn0004828	FBgn0004867	FBgn0010223
FBgn0004832	FBgn0004868	FBgn0010225
FBgn0004837	FBgn0004870	FBgn0010226
FBgn0004838	FBgn0004872	FBgn0010228
FBgn0004839	FBgn0004875	FBgn0010235
FBgn0004855	FBgn0004876	FBgn0010238
FBgn0004856	FBgn0004878	FBgn0010246
FBgn0004859	FBgn0004880	FBgn0010247
FBgn0004860	FBgn0004882	FBgn0010263
FBgn0004861	FBgn0004888	FBgn0010265
FBgn0004864	FBgn0004889	FBgn0010269
FBgn0004867	FBgn0004893	FBgn0010278
FBgn0004868	FBgn0004896	FBgn0010280
FBgn0004872	FBgn0004901	FBgn0010282
FBgn0004875	FBgn0004903	FBgn0010287
FBgn0004876	FBgn0004907	FBgn0010288
FBgn0004878	FBgn0004908	FBgn0010292
FBgn0004882	FBgn0004910	FBgn0010300
FBgn0004885	FBgn0004913	FBgn0010303
FBgn0004888	FBgn0004914	FBgn0010309
FBgn0004889	FBgn0004915	FBgn0010313
FBgn0004892	FBgn0004919	FBgn0010314
FBgn0004893	FBgn0004921	FBgn0010315
FBgn0004901	FBgn0004924	FBgn0010316
FBgn0004903	FBgn0004926	FBgn0010328
FBgn0004907	FBgn0004956	FBgn0010333
FBgn0004908	FBgn0004957	FBgn0010339
FBgn0004913	FBgn0005198	FBgn0010340
FBgn0004914	FBgn0005278	FBgn0010341
FBgn0004915	FBgn0005322	FBgn0010342
FBgn0004921	FBgn0005355	FBgn0010348
FBgn0004924	FBgn0005386	FBgn0010350
FBgn0004926	FBgn0005411	FBgn0010352
FBgn0004956	FBgn0005427	FBgn0010355
FBgn0004957	FBgn0005533	FBgn0010356
FBgn0004959	FBgn0005536	FBgn0010379
FBgn0005198	FBgn0005564	FBgn0010380
FBgn0005278	FBgn0005585	FBgn0010382
FBgn0005322	FBgn0005586	FBgn0010389
FBgn0005355	FBgn0005593	FBgn0010391
FBgn0005386	FBgn0005596	FBgn0010395
FBgn0005390	FBgn0005612	FBgn0010397
FBgn0005411	FBgn0005616	FBgn0010398
FBgn0005427	FBgn0005617	FBgn0010406
FBgn0005533	FBgn0005624	FBgn0010408
FBgn0005536	FBgn0005626	FBgn0010409
FBgn0005558	FBgn0005631	FBgn0010411
FBgn0005564	FBgn0005632	FBgn0010412
FBgn0005585	FBgn0005636	FBgn0010415
FBgn0005590	FBgn0005638	FBgn0010416
FBgn0005593	FBgn0005640	FBgn0010417
FBgn0005596	FBgn0005642	FBgn0010421
FBgn0005616	FBgn0005648	FBgn0010422
FBgn0005617	FBgn0005649	FBgn0010438
FBgn0005624	FBgn0005655	FBgn0010441
FBgn0005631	FBgn0005659	FBgn0010452
FBgn0005632	FBgn0005660	FBgn0010470
FBgn0005636	FBgn0005671	FBgn0010473
FBgn0005640	FBgn0005672	FBgn0010488
FBgn0005642	FBgn0005674	FBgn0010497
FBgn0005648	FBgn0005677	FBgn0010501
FBgn0005649	FBgn0005683	FBgn0010504
FBgn0005654	FBgn0005694	FBgn0010516
FBgn0005655	FBgn0005695	FBgn0010520
FBgn0005671	FBgn0005696	FBgn0010531
FBgn0005672	FBgn0005771	FBgn0010548
FBgn0005674	FBgn0005775	FBgn0010551
FBgn0005683	FBgn0005777	FBgn0010583
FBgn0005694	FBgn0008635	FBgn0010590
FBgn0005695	FBgn0010014	FBgn0010591
FBgn0005696	FBgn0010015	FBgn0010602
FBgn0005771	FBgn0010019	FBgn0010607
FBgn0005777	FBgn0010038	FBgn0010611
FBgn0008635	FBgn0010039	FBgn0010612
FBgn0008636	FBgn0010040	FBgn0010620
FBgn0010038	FBgn0010041	FBgn0010621
FBgn0010039	FBgn0010042	FBgn0010622
FBgn0010051	FBgn0010043	FBgn0010638
FBgn0010052	FBgn0010051	FBgn0010651
FBgn0010053	FBgn0010053	FBgn0010660
FBgn0010078	FBgn0010078	FBgn0010741
FBgn0010097	FBgn0010097	FBgn0010747
FBgn0010100	FBgn0010100	FBgn0010750
FBgn0010105	FBgn0010109	FBgn0010762
FBgn0010109	FBgn0010113	FBgn0010768
FBgn0010113	FBgn0010173	FBgn0010770
FBgn0010173	FBgn0010194	FBgn0010772
FBgn0010194	FBgn0010198	FBgn0010774
FBgn0010198	FBgn0010213	FBgn0010786
FBgn0010213	FBgn0010215	FBgn0010803
FBgn0010215	FBgn0010217	FBgn0010808
FBgn0010217	FBgn0010220	FBgn0010812
FBgn0010220	FBgn0010222	FBgn0010825
FBgn0010222	FBgn0010223	FBgn0010830
FBgn0010223	FBgn0010225	FBgn0010877
FBgn0010225	FBgn0010226	FBgn0010894
FBgn0010226	FBgn0010228	FBgn0010905
FBgn0010228	FBgn0010235	FBgn0010909
FBgn0010235	FBgn0010238	FBgn0010926
FBgn0010238	FBgn0010246	FBgn0011016
FBgn0010246	FBgn0010247	FBgn0011020
FBgn0010247	FBgn0010258	FBgn0011202
FBgn0010263	FBgn0010263	FBgn0011204
FBgn0010265	FBgn0010265	FBgn0011205
FBgn0010269	FBgn0010269	FBgn0011206
FBgn0010278	FBgn0010278	FBgn0011207
FBgn0010280	FBgn0010280	FBgn0011211
FBgn0010282	FBgn0010282	FBgn0011217
FBgn0010287	FBgn0010287	FBgn0011224
FBgn0010288	FBgn0010288	FBgn0011225
FBgn0010292	FBgn0010292	FBgn0011230
FBgn0010300	FBgn0010300	FBgn0011232
FBgn0010303	FBgn0010303	FBgn0011236
FBgn0010309	FBgn0010309	FBgn0011259
FBgn0010313	FBgn0010313	FBgn0011260
FBgn0010314	FBgn0010314	FBgn0011272
FBgn0010315	FBgn0010315	FBgn0011284
FBgn0010316	FBgn0010316	FBgn0011289
FBgn0010317	FBgn0010328	FBgn0011290
FBgn0010328	FBgn0010329	FBgn0011291
FBgn0010333	FBgn0010333	FBgn0011297
FBgn0010339	FBgn0010339	FBgn0011300
FBgn0010340	FBgn0010340	FBgn0011305
FBgn0010341	FBgn0010341	FBgn0011327
FBgn0010342	FBgn0010342	FBgn0011335
FBgn0010348	FBgn0010348	FBgn0011336
FBgn0010350	FBgn0010350	FBgn0011361
FBgn0010352	FBgn0010352	FBgn0011455
FBgn0010355	FBgn0010355	FBgn0011474
FBgn0010356	FBgn0010356	FBgn0011476
FBgn0010379	FBgn0010379	FBgn0011481
FBgn0010380	FBgn0010380	FBgn0011509
FBgn0010382	FBgn0010382	FBgn0011566
FBgn0010389	FBgn0010383	FBgn0011570
FBgn0010391	FBgn0010387	FBgn0011573
FBgn0010395	FBgn0010388	FBgn0011584
FBgn0010397	FBgn0010389	FBgn0011586
FBgn0010398	FBgn0010391	FBgn0011592
FBgn0010406	FBgn0010395	FBgn0011604
FBgn0010408	FBgn0010397	FBgn0011606
FBgn0010409	FBgn0010398	FBgn0011638
FBgn0010411	FBgn0010401	FBgn0011640
FBgn0010412	FBgn0010406	FBgn0011642
FBgn0010415	FBgn0010407	FBgn0011648
FBgn0010416	FBgn0010408	FBgn0011655
FBgn0010417	FBgn0010409	FBgn0011656
FBgn0010421	FBgn0010411	FBgn0011659
FBgn0010422	FBgn0010412	FBgn0011660
FBgn0010431	FBgn0010415	FBgn0011661
FBgn0010433	FBgn0010416	FBgn0011666
FBgn0010438	FBgn0010417	FBgn0011672
FBgn0010441	FBgn0010421	FBgn0011674
FBgn0010452	FBgn0010422	FBgn0011692
FBgn0010470	FBgn0010423	FBgn0011703
FBgn0010473	FBgn0010424	FBgn0011704
FBgn0010488	FBgn0010434	FBgn0011705
FBgn0010497	FBgn0010435	FBgn0011706
FBgn0010501	FBgn0010438	FBgn0011708
FBgn0010504	FBgn0010441	FBgn0011710
FBgn0010516	FBgn0010452	FBgn0011715
FBgn0010520	FBgn0010470	FBgn0011725
FBgn0010531	FBgn0010473	FBgn0011726
FBgn0010548	FBgn0010482	FBgn0011737
FBgn0010549	FBgn0010488	FBgn0011739
FBgn0010551	FBgn0010497	FBgn0011740
FBgn0010583	FBgn0010501	FBgn0011741
FBgn0010590	FBgn0010504	FBgn0011742
FBgn0010591	FBgn0010516	FBgn0011745
FBgn0010602	FBgn0010520	FBgn0011747
FBgn0010607	FBgn0010531	FBgn0011754
FBgn0010611	FBgn0010548	FBgn0011760
FBgn0010612	FBgn0010551	FBgn0011762
FBgn0010620	FBgn0010583	FBgn0011763
FBgn0010621	FBgn0010590	FBgn0011766
FBgn0010622	FBgn0010591	FBgn0011768
FBgn0010638	FBgn0010602	FBgn0011769
FBgn0010651	FBgn0010607	FBgn0011770
FBgn0010660	FBgn0010611	FBgn0011771
FBgn0010741	FBgn0010612	FBgn0011774
FBgn0010747	FBgn0010620	FBgn0011785
FBgn0010750	FBgn0010621	FBgn0011787
FBgn0010762	FBgn0010622	FBgn0011802
FBgn0010768	FBgn0010638	FBgn0011817
FBgn0010770	FBgn0010651	FBgn0011818
FBgn0010772	FBgn0010660	FBgn0011824
FBgn0010774	FBgn0010741	FBgn0011826
FBgn0010786	FBgn0010747	FBgn0011836
FBgn0010803	FBgn0010750	FBgn0011837
FBgn0010808	FBgn0010762	FBgn0012034
FBgn0010812	FBgn0010768	FBgn0012036
FBgn0010825	FBgn0010770	FBgn0012051
FBgn0010830	FBgn0010772	FBgn0012058
FBgn0010877	FBgn0010774	FBgn0013263
FBgn0010894	FBgn0010786	FBgn0013269
FBgn0010905	FBgn0010803	FBgn0013272
FBgn0010909	FBgn0010808	FBgn0013276
FBgn0010926	FBgn0010812	FBgn0013278
FBgn0011016	FBgn0010825	FBgn0013303
FBgn0011020	FBgn0010830	FBgn0013305
FBgn0011202	FBgn0010877	FBgn0013325
FBgn0011204	FBgn0010894	FBgn0013334
FBgn0011205	FBgn0010905	FBgn0013343
FBgn0011206	FBgn0010909	FBgn0013347
FBgn0011207	FBgn0010926	FBgn0013432
FBgn0011211	FBgn0011016	FBgn0013435
FBgn0011217	FBgn0011020	FBgn0013531
FBgn0011224	FBgn0011202	FBgn0013548
FBgn0011225	FBgn0011204	FBgn0013563
FBgn0011227	FBgn0011205	FBgn0013576
FBgn0011230	FBgn0011206	FBgn0013717
FBgn0011232	FBgn0011207	FBgn0013718
FBgn0011236	FBgn0011211	FBgn0013720
FBgn0011259	FBgn0011217	FBgn0013726
FBgn0011260	FBgn0011224	FBgn0013732
FBgn0011272	FBgn0011225	FBgn0013733
FBgn0011284	FBgn0011230	FBgn0013746
FBgn0011289	FBgn0011232	FBgn0013749
FBgn0011290	FBgn0011236	FBgn0013750
FBgn0011291	FBgn0011259	FBgn0013753
FBgn0011297	FBgn0011260	FBgn0013756
FBgn0011300	FBgn0011272	FBgn0013759
FBgn0011305	FBgn0011274	FBgn0013762
FBgn0011327	FBgn0011284	FBgn0013763
FBgn0011335	FBgn0011286	FBgn0013764
FBgn0011336	FBgn0011288	FBgn0013765
FBgn0011361	FBgn0011289	FBgn0013770
FBgn0011455	FBgn0011290	FBgn0013771
FBgn0011474	FBgn0011291	FBgn0013773
FBgn0011476	FBgn0011297	FBgn0013799
FBgn0011481	FBgn0011300	FBgn0013810
FBgn0011509	FBgn0011305	FBgn0013954
FBgn0011566	FBgn0011327	FBgn0013981
FBgn0011570	FBgn0011335	FBgn0013983
FBgn0011573	FBgn0011336	FBgn0013987
FBgn0011584	FBgn0011361	FBgn0013997
FBgn0011586	FBgn0011455	FBgn0014006
FBgn0011592	FBgn0011474	FBgn0014007
FBgn0011604	FBgn0011476	FBgn0014009
FBgn0011606	FBgn0011481	FBgn0014010
FBgn0011638	FBgn0011509	FBgn0014011
FBgn0011640	FBgn0011559	FBgn0014018
FBgn0011642	FBgn0011566	FBgn0014020
FBgn0011648	FBgn0011570	FBgn0014022
FBgn0011653	FBgn0011573	FBgn0014023
FBgn0011655	FBgn0011576	FBgn0014024
FBgn0011656	FBgn0011584	FBgn0014026
FBgn0011659	FBgn0011586	FBgn0014028
FBgn0011660	FBgn0011591	FBgn0014029
FBgn0011661	FBgn0011592	FBgn0014032
FBgn0011666	FBgn0011596	FBgn0014037
FBgn0011672	FBgn0011603	FBgn0014075
FBgn0011674	FBgn0011604	FBgn0014092
FBgn0011692	FBgn0011606	FBgn0014127
FBgn0011703	FBgn0011638	FBgn0014133
FBgn0011704	FBgn0011640	FBgn0014141
FBgn0011705	FBgn0011642	FBgn0014163
FBgn0011706	FBgn0011648	FBgn0014184
FBgn0011708	FBgn0011655	FBgn0014189
FBgn0011710	FBgn0011656	FBgn0014269
FBgn0011715	FBgn0011659	FBgn0014340
FBgn0011723	FBgn0011660	FBgn0014342
FBgn0011725	FBgn0011661	FBgn0014343
FBgn0011726	FBgn0011666	FBgn0014366
FBgn0011737	FBgn0011672	FBgn0014380
FBgn0011739	FBgn0011674	FBgn0014388
FBgn0011740	FBgn0011676	FBgn0014391
FBgn0011741	FBgn0011692	FBgn0014395
FBgn0011742	FBgn0011701	FBgn0014411
FBgn0011745	FBgn0011703	FBgn0014417
FBgn0011747	FBgn0011704	FBgn0014427
FBgn0011754	FBgn0011705	FBgn0014455
FBgn0011760	FBgn0011706	FBgn0014469
FBgn0011761	FBgn0011708	FBgn0014857
FBgn0011762	FBgn0011710	FBgn0014861
FBgn0011763	FBgn0011715	FBgn0014863
FBgn0011766	FBgn0011722	FBgn0014868
FBgn0011768	FBgn0011725	FBgn0014869
FBgn0011769	FBgn0011726	FBgn0014870
FBgn0011770	FBgn0011737	FBgn0014877
FBgn0011771	FBgn0011739	FBgn0014879
FBgn0011774	FBgn0011740	FBgn0014906
FBgn0011785	FBgn0011741	FBgn0014930
FBgn0011787	FBgn0011742	FBgn0014931
FBgn0011802	FBgn0011745	FBgn0015000
FBgn0011817	FBgn0011746	FBgn0015019
FBgn0011818	FBgn0011747	FBgn0015024
FBgn0011824	FBgn0011754	FBgn0015025
FBgn0011826	FBgn0011760	FBgn0015031
FBgn0011836	FBgn0011762	FBgn0015075
FBgn0011837	FBgn0011763	FBgn0015218
FBgn0012034	FBgn0011766	FBgn0015221
FBgn0012036	FBgn0011768	FBgn0015222
FBgn0012037	FBgn0011769	FBgn0015229
FBgn0012051	FBgn0011770	FBgn0015239
FBgn0012058	FBgn0011771	FBgn0015240
FBgn0013263	FBgn0011774	FBgn0015245
FBgn0013269	FBgn0011785	FBgn0015247
FBgn0013272	FBgn0011787	FBgn0015268
FBgn0013275	FBgn0011802	FBgn0015269
FBgn0013276	FBgn0011817	FBgn0015270
FBgn0013278	FBgn0011818	FBgn0015271
FBgn0013303	FBgn0011822	FBgn0015277
FBgn0013305	FBgn0011824	FBgn0015278
FBgn0013325	FBgn0011826	FBgn0015279
FBgn0013334	FBgn0011828	FBgn0015282
FBgn0013343	FBgn0011829	FBgn0015283
FBgn0013347	FBgn0011836	FBgn0015286
FBgn0013432	FBgn0011837	FBgn0015288
FBgn0013435	FBgn0012034	FBgn0015295
FBgn0013531	FBgn0012036	FBgn0015296
FBgn0013548	FBgn0012051	FBgn0015298
FBgn0013563	FBgn0012058	FBgn0015299
FBgn0013576	FBgn0013263	FBgn0015320
FBgn0013717	FBgn0013269	FBgn0015321
FBgn0013718	FBgn0013272	FBgn0015331
FBgn0013720	FBgn0013276	FBgn0015338
FBgn0013725	FBgn0013278	FBgn0015351
FBgn0013726	FBgn0013303	FBgn0015359
FBgn0013732	FBgn0013305	FBgn0015360
FBgn0013733	FBgn0013323	FBgn0015371
FBgn0013746	FBgn0013325	FBgn0015372
FBgn0013749	FBgn0013334	FBgn0015376
FBgn0013750	FBgn0013342	FBgn0015379
FBgn0013753	FBgn0013343	FBgn0015380
FBgn0013755	FBgn0013347	FBgn0015391
FBgn0013756	FBgn0013432	FBgn0015396
FBgn0013759	FBgn0013435	FBgn0015399
FBgn0013762	FBgn0013469	FBgn0015402
FBgn0013763	FBgn0013531	FBgn0015477
FBgn0013764	FBgn0013548	FBgn0015509
FBgn0013765	FBgn0013563	FBgn0015513
FBgn0013770	FBgn0013576	FBgn0015520
FBgn0013771	FBgn0013717	FBgn0015521
FBgn0013773	FBgn0013718	FBgn0015522
FBgn0013799	FBgn0013720	FBgn0015527
FBgn0013810	FBgn0013726	FBgn0015544
FBgn0013954	FBgn0013732	FBgn0015546
FBgn0013981	FBgn0013733	FBgn0015553
FBgn0013983	FBgn0013746	FBgn0015558
FBgn0013987	FBgn0013749	FBgn0015568
FBgn0013995	FBgn0013750	FBgn0015569
FBgn0013997	FBgn0013753	FBgn0015571
FBgn0014002	FBgn0013756	FBgn0015582
FBgn0014006	FBgn0013759	FBgn0015589
FBgn0014007	FBgn0013762	FBgn0015600
FBgn0014009	FBgn0013763	FBgn0015602
FBgn0014010	FBgn0013764	FBgn0015614
FBgn0014011	FBgn0013765	FBgn0015615
FBgn0014018	FBgn0013770	FBgn0015618
FBgn0014020	FBgn0013771	FBgn0015621
FBgn0014022	FBgn0013773	FBgn0015622
FBgn0014023	FBgn0013799	FBgn0015623
FBgn0014024	FBgn0013810	FBgn0015625
FBgn0014026	FBgn0013811	FBgn0015663
FBgn0014028	FBgn0013953	FBgn0015664
FBgn0014029	FBgn0013954	FBgn0015737
FBgn0014032	FBgn0013981	FBgn0015754
FBgn0014037	FBgn0013983	FBgn0015756
FBgn0014075	FBgn0013987	FBgn0015765
FBgn0014092	FBgn0013997	FBgn0015772
FBgn0014127	FBgn0014006	FBgn0015776
FBgn0014133	FBgn0014007	FBgn0015777
FBgn0014141	FBgn0014009	FBgn0015778
FBgn0014143	FBgn0014010	FBgn0015781
FBgn0014163	FBgn0014011	FBgn0015789
FBgn0014184	FBgn0014018	FBgn0015790
FBgn0014189	FBgn0014020	FBgn0015791
FBgn0014269	FBgn0014022	FBgn0015793
FBgn0014340	FBgn0014023	FBgn0015794
FBgn0014342	FBgn0014024	FBgn0015795
FBgn0014343	FBgn0014026	FBgn0015797
FBgn0014366	FBgn0014028	FBgn0015799
FBgn0014380	FBgn0014029	FBgn0015801
FBgn0014388	FBgn0014031	FBgn0015803
FBgn0014391	FBgn0014032	FBgn0015805
FBgn0014395	FBgn0014033	FBgn0015808
FBgn0014411	FBgn0014037	FBgn0015818
FBgn0014417	FBgn0014073	FBgn0015828
FBgn0014427	FBgn0014075	FBgn0015829
FBgn0014455	FBgn0014092	FBgn0015834
FBgn0014469	FBgn0014127	FBgn0015838
FBgn0014857	FBgn0014133	FBgn0015903
FBgn0014861	FBgn0014135	FBgn0015905
FBgn0014863	FBgn0014141	FBgn0015924
FBgn0014868	FBgn0014163	FBgn0015925
FBgn0014869	FBgn0014179	FBgn0015926
FBgn0014870	FBgn0014184	FBgn0015929
FBgn0014877	FBgn0014189	FBgn0015949
FBgn0014879	FBgn0014269	FBgn0016031
FBgn0014906	FBgn0014340	FBgn0016034
FBgn0014930	FBgn0014342	FBgn0016036
FBgn0014931	FBgn0014343	FBgn0016038
FBgn0015000	FBgn0014366	FBgn0016041
FBgn0015019	FBgn0014380	FBgn0016053
FBgn0015024	FBgn0014388	FBgn0016054
FBgn0015025	FBgn0014391	FBgn0016059
FBgn0015031	FBgn0014395	FBgn0016070
FBgn0015036	FBgn0014411	FBgn0016078
FBgn0015075	FBgn0014417	FBgn0016081
FBgn0015218	FBgn0014427	FBgn0016119
FBgn0015221	FBgn0014455	FBgn0016120
FBgn0015222	FBgn0014466	FBgn0016122
FBgn0015229	FBgn0014469	FBgn0016126
FBgn0015239	FBgn0014857	FBgn0016131
FBgn0015240	FBgn0014859	FBgn0016641
FBgn0015245	FBgn0014861	FBgn0016672
FBgn0015247	FBgn0014863	FBgn0016684
FBgn0015268	FBgn0014868	FBgn0016685
FBgn0015269	FBgn0014869	FBgn0016687
FBgn0015270	FBgn0014870	FBgn0016691
FBgn0015271	FBgn0014877	FBgn0016693
FBgn0015277	FBgn0014879	FBgn0016694
FBgn0015278	FBgn0014906	FBgn0016696
FBgn0015279	FBgn0014930	FBgn0016697
FBgn0015282	FBgn0014931	FBgn0016698
FBgn0015283	FBgn0015000	FBgn0016701
FBgn0015286	FBgn0015011	FBgn0016726
FBgn0015288	FBgn0015019	FBgn0016754
FBgn0015295	FBgn0015024	FBgn0016756
FBgn0015296	FBgn0015025	FBgn0016762
FBgn0015298	FBgn0015031	FBgn0016794
FBgn0015299	FBgn0015034	FBgn0016797
FBgn0015320	FBgn0015037	FBgn0016917
FBgn0015321	FBgn0015040	FBgn0016926
FBgn0015331	FBgn0015075	FBgn0016930
FBgn0015338	FBgn0015218	FBgn0016970
FBgn0015351	FBgn0015221	FBgn0016977
FBgn0015359	FBgn0015222	FBgn0016978
FBgn0015360	FBgn0015229	FBgn0016983
FBgn0015371	FBgn0015239	FBgn0016984
FBgn0015372	FBgn0015240	FBgn0017414
FBgn0015376	FBgn0015245	FBgn0017418
FBgn0015379	FBgn0015247	FBgn0017429
FBgn0015380	FBgn0015268	FBgn0017430
FBgn0015391	FBgn0015269	FBgn0017457
FBgn0015393	FBgn0015270	FBgn0017482
FBgn0015396	FBgn0015271	FBgn0017545
FBgn0015399	FBgn0015277	FBgn0017550
FBgn0015402	FBgn0015278	FBgn0017551
FBgn0015477	FBgn0015279	FBgn0017558
FBgn0015509	FBgn0015282	FBgn0017566
FBgn0015513	FBgn0015283	FBgn0017567
FBgn0015520	FBgn0015286	FBgn0017572
FBgn0015521	FBgn0015288	FBgn0017577
FBgn0015522	FBgn0015295	FBgn0017578
FBgn0015527	FBgn0015296	FBgn0017579
FBgn0015544	FBgn0015298	FBgn0017581
FBgn0015546	FBgn0015299	FBgn0019624
FBgn0015553	FBgn0015316	FBgn0019637
FBgn0015558	FBgn0015320	FBgn0019644
FBgn0015568	FBgn0015321	FBgn0019662
FBgn0015569	FBgn0015331	FBgn0019686
FBgn0015571	FBgn0015338	FBgn0019830
FBgn0015582	FBgn0015351	FBgn0019890
FBgn0015589	FBgn0015359	FBgn0019925
FBgn0015600	FBgn0015360	FBgn0019932
FBgn0015602	FBgn0015371	FBgn0019936
FBgn0015614	FBgn0015372	FBgn0019938
FBgn0015615	FBgn0015376	FBgn0019949
FBgn0015618	FBgn0015379	FBgn0019957
FBgn0015621	FBgn0015380	FBgn0019960
FBgn0015622	FBgn0015391	FBgn0019968
FBgn0015623	FBgn0015396	FBgn0019972
FBgn0015625	FBgn0015399	FBgn0019982
FBgn0015663	FBgn0015402	FBgn0019990
FBgn0015664	FBgn0015477	FBgn0020018
FBgn0015721	FBgn0015509	FBgn0020224
FBgn0015737	FBgn0015513	FBgn0020235
FBgn0015754	FBgn0015519	FBgn0020236
FBgn0015756	FBgn0015520	FBgn0020238
FBgn0015765	FBgn0015521	FBgn0020249
FBgn0015772	FBgn0015522	FBgn0020251
FBgn0015773	FBgn0015524	FBgn0020255
FBgn0015776	FBgn0015527	FBgn0020257
FBgn0015777	FBgn0015543	FBgn0020261
FBgn0015778	FBgn0015544	FBgn0020270
FBgn0015781	FBgn0015546	FBgn0020272
FBgn0015789	FBgn0015553	FBgn0020278
FBgn0015790	FBgn0015558	FBgn0020279
FBgn0015791	FBgn0015568	FBgn0020299
FBgn0015793	FBgn0015569	FBgn0020304
FBgn0015794	FBgn0015571	FBgn0020305
FBgn0015795	FBgn0015572	FBgn0020306
FBgn0015797	FBgn0015575	FBgn0020309
FBgn0015799	FBgn0015576	FBgn0020312
FBgn0015801	FBgn0015577	FBgn0020369
FBgn0015803	FBgn0015582	FBgn0020370
FBgn0015805	FBgn0015589	FBgn0020379
FBgn0015808	FBgn0015600	FBgn0020381
FBgn0015818	FBgn0015602	FBgn0020385
FBgn0015828	FBgn0015609	FBgn0020386
FBgn0015829	FBgn0015614	FBgn0020388
FBgn0015834	FBgn0015615	FBgn0020389
FBgn0015838	FBgn0015618	FBgn0020391
FBgn0015903	FBgn0015621	FBgn0020392
FBgn0015905	FBgn0015622	FBgn0020407
FBgn0015924	FBgn0015623	FBgn0020412
FBgn0015925	FBgn0015625	FBgn0020414
FBgn0015926	FBgn0015663	FBgn0020415
FBgn0015929	FBgn0015664	FBgn0020440
FBgn0015949	FBgn0015714	FBgn0020443
FBgn0016031	FBgn0015737	FBgn0020445
FBgn0016034	FBgn0015754	FBgn0020493
FBgn0016036	FBgn0015756	FBgn0020496
FBgn0016038	FBgn0015765	FBgn0020497
FBgn0016041	FBgn0015766	FBgn0020503
FBgn0016053	FBgn0015770	FBgn0020510
FBgn0016054	FBgn0015772	FBgn0020513
FBgn0016059	FBgn0015774	FBgn0020545
FBgn0016070	FBgn0015776	FBgn0020616
FBgn0016078	FBgn0015777	FBgn0020618
FBgn0016080	FBgn0015778	FBgn0020620
FBgn0016081	FBgn0015781	FBgn0020621
FBgn0016119	FBgn0015789	FBgn0020622
FBgn0016120	FBgn0015790	FBgn0020626
FBgn0016122	FBgn0015791	FBgn0020633
FBgn0016126	FBgn0015793	FBgn0020647
FBgn0016131	FBgn0015794	FBgn0020653
FBgn0016641	FBgn0015795	FBgn0020655
FBgn0016672	FBgn0015797	FBgn0020660
FBgn0016684	FBgn0015799	FBgn0020764
FBgn0016685	FBgn0015801	FBgn0020767
FBgn0016687	FBgn0015803	FBgn0020887
FBgn0016691	FBgn0015805	FBgn0020908
FBgn0016693	FBgn0015808	FBgn0020909
FBgn0016694	FBgn0015818	FBgn0020910
FBgn0016696	FBgn0015828	FBgn0020930
FBgn0016697	FBgn0015829	FBgn0021750
FBgn0016698	FBgn0015834	FBgn0021760
FBgn0016701	FBgn0015838	FBgn0021761
FBgn0016726	FBgn0015872	FBgn0021764
FBgn0016754	FBgn0015903	FBgn0021765
FBgn0016756	FBgn0015904	FBgn0021768
FBgn0016762	FBgn0015905	FBgn0021776
FBgn0016794	FBgn0015924	FBgn0021795
FBgn0016797	FBgn0015925	FBgn0021796
FBgn0016917	FBgn0015926	FBgn0021800
FBgn0016926	FBgn0015929	FBgn0021814
FBgn0016930	FBgn0015949	FBgn0021825
FBgn0016970	FBgn0016013	FBgn0021847
FBgn0016976	FBgn0016031	FBgn0021856
FBgn0016977	FBgn0016032	FBgn0021872
FBgn0016978	FBgn0016034	FBgn0021874
FBgn0016983	FBgn0016036	FBgn0021875
FBgn0016984	FBgn0016038	FBgn0021895
FBgn0017414	FBgn0016041	FBgn0021906
FBgn0017418	FBgn0016053	FBgn0021944
FBgn0017429	FBgn0016054	FBgn0021967
FBgn0017430	FBgn0016059	FBgn0021979
FBgn0017448	FBgn0016061	FBgn0021995
FBgn0017457	FBgn0016070	FBgn0022023
FBgn0017482	FBgn0016075	FBgn0022027
FBgn0017545	FBgn0016076	FBgn0022029
FBgn0017550	FBgn0016078	FBgn0022069
FBgn0017551	FBgn0016081	FBgn0022097
FBgn0017558	FBgn0016119	FBgn0022153
FBgn0017561	FBgn0016120	FBgn0022160
FBgn0017566	FBgn0016122	FBgn0022213
FBgn0017567	FBgn0016123	FBgn0022224
FBgn0017572	FBgn0016126	FBgn0022238
FBgn0017577	FBgn0016131	FBgn0022288
FBgn0017578	FBgn0016641	FBgn0022338
FBgn0017579	FBgn0016672	FBgn0022343
FBgn0017581	FBgn0016675	FBgn0022344
FBgn0019624	FBgn0016684	FBgn0022349
FBgn0019637	FBgn0016685	FBgn0022359
FBgn0019644	FBgn0016687	FBgn0022361
FBgn0019662	FBgn0016691	FBgn0022382
FBgn0019686	FBgn0016693	FBgn0022699
FBgn0019830	FBgn0016694	FBgn0022702
FBgn0019890	FBgn0016696	FBgn0022709
FBgn0019925	FBgn0016697	FBgn0022710
FBgn0019932	FBgn0016698	FBgn0022724
FBgn0019936	FBgn0016701	FBgn0022764
FBgn0019938	FBgn0016715	FBgn0022768
FBgn0019949	FBgn0016726	FBgn0022786
FBgn0019957	FBgn0016754	FBgn0022787
FBgn0019960	FBgn0016756	FBgn0022893
FBgn0019968	FBgn0016762	FBgn0022935
FBgn0019972	FBgn0016794	FBgn0022936
FBgn0019982	FBgn0016797	FBgn0022942
FBgn0019985	FBgn0016917	FBgn0022943
FBgn0019990	FBgn0016926	FBgn0022959
FBgn0020018	FBgn0016930	FBgn0022960
FBgn0020224	FBgn0016970	FBgn0022984
FBgn0020235	FBgn0016974	FBgn0022985
FBgn0020236	FBgn0016977	FBgn0022986
FBgn0020238	FBgn0016978	FBgn0022987
FBgn0020248	FBgn0016983	FBgn0023000
FBgn0020249	FBgn0016984	FBgn0023023
FBgn0020251	FBgn0017414	FBgn0023081
FBgn0020255	FBgn0017418	FBgn0023083
FBgn0020257	FBgn0017429	FBgn0023094
FBgn0020261	FBgn0017430	FBgn0023095
FBgn0020270	FBgn0017456	FBgn0023097
FBgn0020272	FBgn0017457	FBgn0023129
FBgn0020278	FBgn0017482	FBgn0023130
FBgn0020279	FBgn0017545	FBgn0023143
FBgn0020299	FBgn0017550	FBgn0023167
FBgn0020300	FBgn0017551	FBgn0023169
FBgn0020304	FBgn0017558	FBgn0023170
FBgn0020305	FBgn0017566	FBgn0023171
FBgn0020306	FBgn0017567	FBgn0023172
FBgn0020309	FBgn0017572	FBgn0023174
FBgn0020312	FBgn0017577	FBgn0023175
FBgn0020369	FBgn0017578	FBgn0023177
FBgn0020370	FBgn0017579	FBgn0023180
FBgn0020377	FBgn0017581	FBgn0023181
FBgn0020379	FBgn0017590	FBgn0023212
FBgn0020381	FBgn0019624	FBgn0023213
FBgn0020385	FBgn0019637	FBgn0023214
FBgn0020386	FBgn0019643	FBgn0023216
FBgn0020388	FBgn0019644	FBgn0023388
FBgn0020389	FBgn0019660	FBgn0023395
FBgn0020391	FBgn0019661	FBgn0023407
FBgn0020392	FBgn0019662	FBgn0023441
FBgn0020407	FBgn0019686	FBgn0023458
FBgn0020412	FBgn0019830	FBgn0023477
FBgn0020414	FBgn0019890	FBgn0023479
FBgn0020415	FBgn0019925	FBgn0023506
FBgn0020440	FBgn0019932	FBgn0023507
FBgn0020443	FBgn0019936	FBgn0023508
FBgn0020445	FBgn0019938	FBgn0023509
FBgn0020493	FBgn0019940	FBgn0023510
FBgn0020496	FBgn0019949	FBgn0023511
FBgn0020497	FBgn0019952	FBgn0023512
FBgn0020503	FBgn0019957	FBgn0023513
FBgn0020510	FBgn0019960	FBgn0023514
FBgn0020513	FBgn0019968	FBgn0023515
FBgn0020545	FBgn0019972	FBgn0023516
FBgn0020616	FBgn0019982	FBgn0023517
FBgn0020618	FBgn0019990	FBgn0023518
FBgn0020620	FBgn0020018	FBgn0023519
FBgn0020621	FBgn0020224	FBgn0023520
FBgn0020622	FBgn0020235	FBgn0023521
FBgn0020626	FBgn0020236	FBgn0023522
FBgn0020633	FBgn0020238	FBgn0023526
FBgn0020647	FBgn0020249	FBgn0023527
FBgn0020653	FBgn0020251	FBgn0023528
FBgn0020655	FBgn0020255	FBgn0023529
FBgn0020660	FBgn0020257	FBgn0023530
FBgn0020764	FBgn0020261	FBgn0023531
FBgn0020767	FBgn0020269	FBgn0023536
FBgn0020887	FBgn0020270	FBgn0023537
FBgn0020908	FBgn0020272	FBgn0023540
FBgn0020909	FBgn0020278	FBgn0023542
FBgn0020910	FBgn0020279	FBgn0023545
FBgn0020930	FBgn0020294	FBgn0023549
FBgn0021750	FBgn0020299	FBgn0024150
FBgn0021760	FBgn0020304	FBgn0024179
FBgn0021761	FBgn0020305	FBgn0024183
FBgn0021764	FBgn0020306	FBgn0024187
FBgn0021765	FBgn0020307	FBgn0024188
FBgn0021768	FBgn0020309	FBgn0024191
FBgn0021776	FBgn0020312	FBgn0024194
FBgn0021795	FBgn0020369	FBgn0024196
FBgn0021796	FBgn0020370	FBgn0024222
FBgn0021800	FBgn0020372	FBgn0024227
FBgn0021814	FBgn0020379	FBgn0024230
FBgn0021825	FBgn0020381	FBgn0024234
FBgn0021847	FBgn0020385	FBgn0024236
FBgn0021856	FBgn0020386	FBgn0024238
FBgn0021872	FBgn0020388	FBgn0024244
FBgn0021874	FBgn0020389	FBgn0024245
FBgn0021875	FBgn0020391	FBgn0024248
FBgn0021895	FBgn0020392	FBgn0024250
FBgn0021906	FBgn0020407	FBgn0024251
FBgn0021944	FBgn0020412	FBgn0024273
FBgn0021967	FBgn0020414	FBgn0024277
FBgn0021979	FBgn0020415	FBgn0024285
FBgn0021995	FBgn0020416	FBgn0024291
FBgn0022023	FBgn0020429	FBgn0024314
FBgn0022027	FBgn0020440	FBgn0024315
FBgn0022029	FBgn0020443	FBgn0024320
FBgn0022069	FBgn0020445	FBgn0024326
FBgn0022097	FBgn0020493	FBgn0024329
FBgn0022153	FBgn0020496	FBgn0024330
FBgn0022160	FBgn0020497	FBgn0024352
FBgn0022213	FBgn0020503	FBgn0024360
FBgn0022224	FBgn0020506	FBgn0024362
FBgn0022238	FBgn0020510	FBgn0024364
FBgn0022288	FBgn0020513	FBgn0024365
FBgn0022338	FBgn0020545	FBgn0024366
[truncated: 7,328 more rows]

[truncated: 1 more sheets: Transcript data for Figure 6A-C]
