# Supplementary material
Source: HighWire-hosted journal article supplement (doi:10.1101/rna.079813.123)
Supplement: Supplemental_TableS5.xlsx [file Supplemental_TableS5.xlsx]

## Sheet: Up Not1+Pop2
FBgeneID	name.x	1522 genes are upregulated by Not1 and Pop2 Knockdown
FBgn0011704	RnrS
FBgn0000180	bib
FBgn0035696	Best2
FBgn0000077	amx
FBgn0265726	Nna1
FBgn0053556	form3
FBgn0000427	dec
FBgn0013272	Gp150
FBgn0028360	Cdc7
FBgn0040334	Tsp3A
FBgn0031971	Sirup
FBgn0001085	fz
FBgn0033812	Pex13
FBgn0002973	numb
FBgn0003079	Raf
FBgn0003716	tkv
FBgn0035936	Tsp66E
FBgn0039135	CG13603
FBgn0026144	CBP
FBgn0041789	Pax
FBgn0261710	nocte
FBgn0266674	Sec15
FBgn0010421	TfIIFbeta
FBgn0034628	Acox57D-p
FBgn0030744	CG9992
FBgn0032480	Edem2
FBgn0028980	tant
FBgn0035888	CG7120
FBgn0036288	CG10660
FBgn0030343	ATP7
FBgn0039065	Rad60
FBgn0261563	wb
FBgn0045842	yuri
FBgn0036202	CG6024
FBgn0004511	dy
FBgn0265276	l(3)neo38
FBgn0003065	CG2150
FBgn0261561	CG42675
FBgn0032631	CG15140
FBgn0028484	Ack
FBgn0028982	Spt6
FBgn0050460	CG30460
FBgn0010812	unc-45
FBgn0033236	CG14764
FBgn0027572	ACOX1
FBgn0024236	foi
FBgn0032078	C1GalTA
FBgn0002576	lz
FBgn0032105	borr
FBgn0034861	CG9815
FBgn0035452	CG10359
FBgn0037076	ebd2
FBgn0039109	CG10365
FBgn0035896	CG6983
FBgn0027844	CAH1
FBgn0265991	Zasp52
FBgn0004878	cas
FBgn0050203	CG30203
FBgn0034870	CG13559
FBgn0035237	CG13917
FBgn0040367	CG11382
FBgn0032192	CG5731
FBgn0031534	Snx1
FBgn0001324	kto
FBgn0031759	Kdm5
FBgn0024273	WASp
FBgn0267318	lncRNA_CR45754
FBgn0263998	Ack-like
FBgn0035734	CG14823
FBgn0038760	MED25
FBgn0026255	clumsy
FBgn0038546	CG7379
FBgn0025525	bab2
FBgn0033483	egr
FBgn0035173	CG13907
FBgn0051961	TBCC
FBgn0003731	Egfr
FBgn0035236	CG12004
FBgn0262737	mub
FBgn0085420	DIP-delta
FBgn0004359	T48
FBgn0041150	hoe1
FBgn0043458	CG12084
FBgn0262955	Polr2B
FBgn0026397	Or22b
FBgn0085409	smal
FBgn0261565	Lmpt
FBgn0030944	Hou
FBgn0029791	AdamTS-B
FBgn0261938	PolrMT
FBgn0026379	Pten
FBgn0033987	ckn
FBgn0259173	corn
FBgn0032409	Ced-12
FBgn0033463	CG1513
FBgn0029771	CG12730
FBgn0035026	Fcp1
FBgn0264325	Atg6
FBgn0086711	mol
FBgn0026441	ear
FBgn0027660	blot
FBgn0021760	chb
FBgn0030858	IntS2
FBgn0264978	Slh
FBgn0021796	Tor
FBgn0037478	CG2656
FBgn0051865	Ada1-1
FBgn0030082	HP1b
FBgn0263601	mib1
FBgn0036544	sff
FBgn0000455	Dip-C
FBgn0032876	Cen
FBgn0028695	Rpn1
FBgn0262614	pyd
FBgn0035849	ERR
FBgn0022774	Oat
FBgn0039321	CG10550
FBgn0032446	IFT43
FBgn0283666	Rap2l
FBgn0033448	hebe
FBgn0032516	Ing5
FBgn0000384	cta
FBgn0039642	CG11882
FBgn0002645	Map205
FBgn0000964	tj
FBgn0039381	SppL
FBgn0052666	Drak
FBgn0038088	CG10126
FBgn0260935	Vps15
FBgn0042125	CG18787
FBgn0264339	CG43795
FBgn0000489	Pka-C3
FBgn0003520	stau
FBgn0031478	CG8814
FBgn0261983	l(2)gd1
FBgn0031449	CG31689
FBgn0038515	CG5823
FBgn0086362	spn-F
FBgn0013749	Arf102F
FBgn0038202	CG12402
FBgn0004646	ogre
FBgn0267202	lncRNA_CR45642
FBgn0013765	cnn
FBgn0036316	nebu
FBgn0037022	CG11396
FBgn0000139	ash2
FBgn0011202	dia
FBgn0026238	gus
FBgn0031895	CG4497
FBgn0261925	CG42792
FBgn0033259	Tmem63
FBgn0053107	CG33107
FBgn0085426	Rgk3
FBgn0266441	CG45071
FBgn0013983	imd
FBgn0039705	Atg16
FBgn0027556	CG4928
FBgn0035480	CG14984
FBgn0020620	RN-tre
FBgn0036104	CG6418
FBgn0037758	CG9467
FBgn0002643	mam
FBgn0265464	Traf6
FBgn0030964	Pvf1
FBgn0053653	Cadps
FBgn0026634	Cog2
FBgn0040056	CG17698
FBgn0026179	siz
FBgn0020762	Atet
FBgn0039665	CG2310
FBgn0023177	Pp4-19C
FBgn0033330	CG8746
FBgn0033177	CG11141
FBgn0087007	bbg
FBgn0033459	CG12744
FBgn0051643	CG31643
FBgn0034403	CG18190
FBgn0038414	CG6901
FBgn0038299	Spn88Eb
FBgn0033609	Fbl6
FBgn0037130	Syn1
FBgn0038686	CG5555
FBgn0036279	Ncc69
FBgn0000395	cv-2
FBgn0004381	Klp68D
FBgn0031119	CG1812
FBgn0032816	Nf-YB
FBgn0020616	SA
FBgn0000490	dpp
FBgn0032935	Atg18b
FBgn0051637	CG31637
FBgn0037207	Mes2
FBgn0261545	CG42663
FBgn0265101	Sgt1
FBgn0035581	Dnah3
FBgn0004456	mew
FBgn0034013	unc-5
FBgn0039089	beat-IV
FBgn0039531	CG5611
FBgn0034948	PPP1R15
FBgn0001491	l(1)10Bb
FBgn0265449	lncRNA_CR44349
FBgn0036688	Fit2
FBgn0027594	drpr
FBgn0003159	CG2841
FBgn0038767	trem
FBgn0030960	Atg101
FBgn0035437	Strip
FBgn0031893	MICU1
FBgn0040273	Spt5
FBgn0002715	mei-S332
FBgn0033757	muskelin
FBgn0027363	Stam
FBgn0017551	Rca1
FBgn0035725	Mis12
FBgn0037126	CG14567
FBgn0261873	sdt
FBgn0015402	ksr
FBgn0050463	Pgant9
FBgn0030955	CG6891
FBgn0028491	CG2930
FBgn0015519	nAChRalpha3
FBgn0000567	Eip74EF
FBgn0033450	Lsm11
FBgn0026582	Hmg-2
FBgn0032167	CG5853
FBgn0036994	CG5199
FBgn0003090	pk
FBgn0035539	slow
FBgn0038619	CG7685
FBgn0036741	anchor
FBgn0015277	Pi3K59F
FBgn0000578	ena
FBgn0035432	ZnT63C
FBgn0029913	Cht11
FBgn0040080	pins
FBgn0036292	CG10646
FBgn0032004	CG8292
FBgn0036155	CG6163
FBgn0035608	blanks
FBgn0259175	ome
FBgn0259245	DIP-beta
FBgn0036893	PIG-F
FBgn0052506	tbc
FBgn0025373	Fpps
FBgn0004648	svr
FBgn0035028	Start1
FBgn0038603	PKD
FBgn0030228	BTBD9
FBgn0264942	lncRNA_CR44111
FBgn0031598	Vps53
FBgn0031897	CG13784
FBgn0033224	Nop17l
FBgn0014127	barr
FBgn0260049	flr
FBgn0036846	MESR6
FBgn0034158	CG5522
FBgn0261239	Hr39
FBgn0031224	CG11454
FBgn0265413	CG44325
FBgn0035233	Pex10
FBgn0010015	CanA1
FBgn0025776	ind
FBgn0284247	ds
FBgn0025558	CG4101
FBgn0027539	lili
FBgn0031281	Saf6
FBgn0037443	Dmtn
FBgn0040207	kat80
FBgn0261722	fwe
FBgn0283741	prage
FBgn0030268	Klp10A
FBgn0020633	Mcm7
FBgn0035091	CG3829
FBgn0035444	CG12012
FBgn0027561	CG18659
FBgn0020655	ArfGAP1
FBgn0050345	CG30345
FBgn0037442	gzl
FBgn0040092	lectin-46Cb
FBgn0029838	CG4666
FBgn0032003	CG8349
FBgn0033792	CG13325
FBgn0001965	Sos
FBgn0035158	CG13895
FBgn0035148	CG3402
FBgn0015808	ScpX
FBgn0039204	CG6607
FBgn0036058	CG6707
FBgn0038325	Atg4b
FBgn0019949	Cdk9
FBgn0029837	Tsp5D
FBgn0032130	brwl
FBgn0037780	ohgt
FBgn0031652	jet
FBgn0046296	DEF8
FBgn0004049	yrt
FBgn0029999	CG1575
FBgn0032231	CG5056
FBgn0030300	Sk1
FBgn0039360	CLS
FBgn0026787	Nhe1
FBgn0036516	CG7656
FBgn0032470	Ttc30
FBgn0040087	p115
FBgn0262473	Tl
FBgn0283451	br
FBgn0033951	CG10139
FBgn0015924	crq
FBgn0015331	abs
FBgn0011648	Mad
FBgn0015903	apt
FBgn0032910	CG9265
FBgn0285962	CG46338
FBgn0036063	CG6674
FBgn0037539	CG10435
FBgn0001987	Gli
FBgn0016917	Stat92E
FBgn0036988	CG5262
FBgn0020299	stumps
FBgn0032140	CG13117
FBgn0001224	Hsp23
FBgn0032772	CG17350
FBgn0026411	Lim1
FBgn0037282	CG14657
FBgn0261564	ReepA
FBgn0031888	Pvf2
FBgn0261477	slim
FBgn0039323	CG10559
FBgn0263289	scrib
FBgn0034933	CG3735
FBgn0037491	CG1227
FBgn0032358	Ppt2
FBgn0031456	Tnpo-SR
FBgn0035246	CG13928
FBgn0042127	CG18789
FBgn0029092	ced-6
FBgn0031377	CG15356
FBgn0050021	metro
FBgn0051989	Cap-D3
FBgn0000228	Bsg25D
FBgn0003499	sr
FBgn0034741	CG4269
FBgn0004575	Syn
FBgn0263042	CG43337
FBgn0005626	ple
FBgn0034110	Atg9
FBgn0263392	Tet
FBgn0028481	CG4341
FBgn0036932	CG14184
FBgn0043903	dome
FBgn0259994	OtopLa
FBgn0000289	cg
FBgn0032682	grnd
FBgn0032895	twit
FBgn0000546	EcR
FBgn0032670	CG5783
FBgn0051118	RabX4
FBgn0030090	fend
FBgn0051064	CG31064
FBgn0264341	CG43797
FBgn0032445	CG6153
FBgn0033859	fand
FBgn0051633	CG31633
FBgn0029608	CG3091
FBgn0000577	en
FBgn0054051	CG34051
FBgn0038504	Sur-8
FBgn0030735	CG3632
FBgn0262733	Src64B
FBgn0010109	dpn
FBgn0003475	spir
FBgn0037734	trbd
FBgn0086346	ALiX
FBgn0034179	CG6805
FBgn0051361	dpr17
FBgn0015239	Hr78
FBgn0262714	Sap130
FBgn0085446	CG34417
FBgn0038593	Vps39
FBgn0085359	CG34330
FBgn0036302	sowah
FBgn0034315	CG5721
FBgn0030012	CG18262
FBgn0000116	Argk
FBgn0052150	meru
FBgn0030055	Rubicon
FBgn0017482	T3dh
FBgn0000377	crn
FBgn0040236	c11_
FBgn0283469	Vps4
FBgn0033550	CG12341
FBgn0036732	Oatp74D
FBgn0011591	fng
FBgn0035868	CG7194
FBgn0036510	SCCRO
FBgn0020621	Pkn
FBgn0004108	Nrt
FBgn0035160	hng3
FBgn0085370	Pde11
FBgn0011291	Taf11
FBgn0037998	Cog1
FBgn0267726	CG46059
FBgn0053080	CG33080
FBgn0038110	CG8031
FBgn0039155	Kal1
FBgn0052095	CG32095
FBgn0016794	dos
FBgn0266956	lncRNA_CR45407
FBgn0015790	Rab11
FBgn0283437	PPO1
FBgn0035900	ZC3H3
FBgn0032751	CG17343
FBgn0010441	pll
FBgn0011225	jar
FBgn0035540	Syx17
FBgn0261514	NimA
FBgn0035850	Atg18a
FBgn0014006	Ask1
FBgn0031090	Rab35
FBgn0039505	CG5934
FBgn0036484	Pex3
FBgn0036101	NijA
FBgn0263343	lncRNA_CR43424
FBgn0016930	Dyrk2
FBgn0036581	MED10
FBgn0000721	for
FBgn0003023	otu
FBgn0261444	CG3638
FBgn0036566	ClC-c
FBgn0030575	CG5321
FBgn0052476	mthl14
FBgn0036773	CG13698
FBgn0016926	Pino
FBgn0025683	CG3164
FBgn0004436	Ubc6
FBgn0267849	Syx7
FBgn0265597	rad
FBgn0030052	CG12065
FBgn0031535	CG12795
FBgn0003302	rux
FBgn0262962	CG43273
FBgn0011710	Septin1
FBgn0036255	Atg12
FBgn0026324	Taf10b
FBgn0034639	CG15673
FBgn0017430	Nelf-E
FBgn0029662	CG12206
FBgn0034420	CG10737
FBgn0038787	CG4360
FBgn0264500	lncRNA_CR43899
FBgn0029763	Usp16-45
FBgn0003330	Sce
FBgn0034181	CG8963
FBgn0035756	unc-13-4A
FBgn0043012	AP-2sigma
FBgn0001108	DCTN1-p150
FBgn0264751	Vti1b
FBgn0262937	Rabex-5
FBgn0037980	DCAF12
FBgn0031169	CG1494
FBgn0033458	Lime
FBgn0026080	Tip60
FBgn0264442	ab
FBgn0039710	dgt1
FBgn0037612	CG8112
FBgn0003391	shg
FBgn0014340	mof
FBgn0259145	CG42260
FBgn0031939	CG13796
FBgn0035488	CG11593
FBgn0004910	Eip63F-1
FBgn0067629	CG33332
FBgn0039213	atl
FBgn0086895	pea
FBgn0031896	CG4502
FBgn0034172	CG6665
FBgn0032796	cyst
FBgn0003118	pnt
FBgn0003654	sw
FBgn0263782	Hmgcr
FBgn0038463	CG3534
FBgn0039709	Cad99C
FBgn0020269	mspo
FBgn0013718	nuf
FBgn0035097	CG13405
FBgn0013753	Bgb
FBgn0036062	CG6685
FBgn0043900	pygo
FBgn0032001	CG8360
FBgn0011771	Hem
FBgn0039623	CG1951
FBgn0035703	Bulli
FBgn0003416	sl
FBgn0023549	Mct1
FBgn0032129	jp
FBgn0035877	CG7083
FBgn0024227	aurB
FBgn0028396	TotA
FBgn0265950	lncRNA_CR44737
FBgn0033199	CG17985
FBgn0001145	Gs2
FBgn0003748	Treh
FBgn0038672	CG6005
FBgn0034494	CG10444
FBgn0010501	Dcp-1
FBgn0003447	sn
FBgn0086657	IKKepsilon
FBgn0020626	Osbp
FBgn0030659	CG9215
FBgn0035461	ntc
FBgn0052447	CG32447
FBgn0034791	EMC8-9
FBgn0032763	CG17568
FBgn0032731	Swip-1
FBgn0038337	CG6125
FBgn0052773	lncRNA_CR32773
FBgn0024963	GluClalpha
FBgn0015600	toc
FBgn0037560	CR18228
FBgn0032642	CG5110
FBgn0035157	CG13894
FBgn0030625	CG5877
FBgn0039150	CG13605
FBgn0038965	mats
FBgn0031050	Arp10
FBgn0042213	CG18731
FBgn0028926	NC2beta
FBgn0005642	wdn
FBgn0025742	mtm
FBgn0032897	CG9336
FBgn0050026	CG30026
FBgn0030838	CG5445
FBgn0020416	Idgf1
FBgn0037000	ZnT77C
FBgn0033494	KCNQ
FBgn0036372	Abp1
FBgn0260940	lsn
FBgn0032170	CG4658
FBgn0263108	BtbVII
FBgn0037304	CG1113
FBgn0039169	Spps
FBgn0036897	Rnf146
FBgn0037884	Arfip
FBgn0045485	Gr36c
FBgn0034380	Vps51
FBgn0261648	salm
FBgn0043841	vir-1
FBgn0283468	slmb
FBgn0038595	CG7142
FBgn0031950	Herp
FBgn0039958	CG12567
FBgn0261985	Ptpmeg
FBgn0002930	nec
FBgn0243486	rdo
FBgn0035388	CG2162
FBgn0040319	Gclc
FBgn0002552	lin
FBgn0010434	cora
FBgn0250785	vari
FBgn0037279	CG1129
FBgn0039743	Jasper
FBgn0039696	Rnb
FBgn0038371	Pbp45
FBgn0000711	flw
FBgn0031723	CG7251
FBgn0045852	ham
FBgn0035708	axed
FBgn0027934	alpha-Est4aPsi
FBgn0265951	lncRNA_CR44738
FBgn0038498	beat-IIa
FBgn0001078	ftz-f1
FBgn0053181	CG33181
FBgn0039970	CG17508
FBgn0011566	Smyd3
FBgn0267351	Topors
FBgn0035754	MED4
FBgn0037917	wkd
FBgn0003435	sm
FBgn0031194	CG17598
FBgn0027598	cindr
FBgn0031866	Nlg2
FBgn0032717	CG10600
FBgn0050371	CG30371
FBgn0033538	CG11883
FBgn0052549	CG32549
FBgn0038300	Mau2
FBgn0037446	Zif
FBgn0004837	Su(H)
FBgn0035414	CG14965
FBgn0033673	CG8298
FBgn0261674	CG42709
FBgn0027585	CG8740
FBgn0263593	Lpin
FBgn0036272	Sms
FBgn0000376	crm
FBgn0067102	GlcT
FBgn0053207	pxb
FBgn0030701	CG16952
FBgn0031270	CG13689
FBgn0051040	Cog7
FBgn0284254	Impbeta11
FBgn0035294	Mfap1
FBgn0033762	ZnT49B
FBgn0032210	CYLD
FBgn0264574	Glut1
FBgn0033784	SCCRO3
FBgn0052758	Snx27
FBgn0086442	mib2
FBgn0039071	bb8
FBgn0038652	CG7720
FBgn0034184	CG9646
FBgn0032485	CG9426
FBgn0260632	dl
FBgn0053531	Ddr
FBgn0034477	CG13872
FBgn0025802	Sbf
FBgn0285913	red
FBgn0265186	CG44251
FBgn0001169	H
FBgn0011706	rpr
FBgn0086784	stmA
FBgn0266186	Vamp7
FBgn0086698	frtz
FBgn0038981	CG5346
FBgn0061198	HSPC300
FBgn0039266	CG11791
FBgn0031458	aph-1
FBgn0003964	usp
FBgn0017550	Rga
FBgn0003463	sog
FBgn0265180	CG44245
FBgn0261461	RhoGAP18B
FBgn0263220	Hk
FBgn0261437	CSN8
FBgn0034442	CG11257
FBgn0051638	CG31638
FBgn0001217	Hsc70-2
FBgn0037116	Als2
FBgn0030894	Mvb12
FBgn0004397	Vinc
FBgn0052672	Atg8a
FBgn0037234	CG9795
FBgn0033653	CG13192
FBgn0262352	CG43050
FBgn0263773	fok
FBgn0052365	CG32365
FBgn0036395	CG17361
FBgn0032586	Tpr2
FBgn0001120	gnu
FBgn0028953	CG14478
FBgn0052649	Coq8
FBgn0030891	Ada3
FBgn0035132	mthl10
FBgn0037720	CG8312
FBgn0034763	RYBP
FBgn0039694	fig
FBgn0262867	Ptr
FBgn0038569	CG7218
FBgn0038582	CG7988
FBgn0085220	Ufm1
FBgn0035704	Vps8
FBgn0040208	Kat60
FBgn0266895	lncRNA_CR45355
FBgn0025865	Cortactin
FBgn0039066	EloA
FBgn0259824	Hip14
FBgn0005355	Su(fu)
FBgn0032030	Wdr82
FBgn0034650	NC2alpha
FBgn0266670	Sec5
FBgn0004876	cdi
FBgn0031701	TotM
FBgn0036118	Blos2
FBgn0083956	CG34120
FBgn0035571	CG12493
FBgn0027518	Wdr24
FBgn0038114	CG11670
FBgn0015279	Pi3K92E
FBgn0031606	CG15439
FBgn0037760	FBXO11
FBgn0029820	CG16721
FBgn0023095	caps
FBgn0039738	Mgat2
FBgn0035073	CG16896
FBgn0038301	CG6654
FBgn0261547	Exn
FBgn0261986	RASSF8
FBgn0027621	Pfrx
FBgn0250869	CG42240
FBgn0033055	Tbce
FBgn0040271	Sulf1
FBgn0034366	Atg7
FBgn0015000	betaggt-I
FBgn0011676	Nos
FBgn0033787	CG13321
FBgn0038316	CG6276
FBgn0032467	Ube4B
FBgn0051957	CG31957
FBgn0031947	Brd7-9
FBgn0014133	bif
FBgn0015795	Rab7
FBgn0028875	nAChRalpha5
FBgn0050377	CG30377
FBgn0265928	lncRNA_CR44717
FBgn0027508	Tnks
FBgn0028421	Kap3
FBgn0024277	trio
FBgn0024698	Cpsf160
FBgn0033051	Strica
FBgn0030432	CG4404
FBgn0035149	MED30
FBgn0046687	Tre1
FBgn0037778	mtTFB2
FBgn0030342	CG10347
FBgn0083969	CG34133
FBgn0031760	Tsp26A
FBgn0086708	stv
FBgn0265185	CG44250
FBgn0033725	Cpr49Ac
FBgn0262509	nrm
FBgn0039026	CG7029
FBgn0285963	CG46339
FBgn0030555	Fbxl4
FBgn0031395	CG10874
FBgn0032214	CG4968
FBgn0003206	Ras64B
FBgn0034985	CG3328
FBgn0037949	prd1
FBgn0041605	cpx
FBgn0014033	Sr-CI
FBgn0015609	CadN
FBgn0035879	GAPcenA
FBgn0029959	Rab39
FBgn0039141	spas
FBgn0261802	CG42748
FBgn0051357	Kaz
FBgn0052380	SMSr
FBgn0035140	BORCS6
FBgn0037299	Vps37B
FBgn0034310	Nup75
FBgn0039883	RhoGAP100F
FBgn0028550	Atf3
FBgn0030630	CG12608
FBgn0264006	dysc
FBgn0261238	Alh
FBgn0265001	ppk18
FBgn0259938	cwo
FBgn0041184	Socs36E
FBgn0086350	tef
FBgn0032517	CG7099
FBgn0037538	CG3223
FBgn0027515	CG7115
FBgn0035589	CHMP2B
FBgn0015380	drl
FBgn0031420	Atxn7
FBgn0024542	Neos
FBgn0036964	FRG1
FBgn0024980	Syx4
FBgn0038206	twf
FBgn0010356	Taf5
FBgn0000008	a
FBgn0250871	pot
FBgn0002948	nod
FBgn0035282	CNMa
FBgn0259212	cno
FBgn0024887	kin17
FBgn0035986	CG4022
FBgn0050115	GEFmeso
FBgn0031374	Wdr62
FBgn0044452	Atg2
FBgn0266722	Trs33
FBgn0033266	Socs44A
FBgn0039528	dsd
FBgn0000257	car
FBgn0039532	Mtl
FBgn0034223	Tes
FBgn0038304	CG12241
FBgn0035260	CG7991
FBgn0263607	l(3)72Dp
FBgn0031693	Cyp4ac1
FBgn0045063	fdl
FBgn0038475	Keap1
FBgn0039666	Diedel
FBgn0267698	Pak
FBgn0005695	gcl
FBgn0027951	MTA1-like
FBgn0030013	GIIIspla2
FBgn0033639	CG9003
FBgn0000543	ecd
FBgn0028546	ics
FBgn0030034	CG10555
FBgn0032298	CG6724
FBgn0035916	GAPsec
FBgn0003175	px
FBgn0003042	Pc
FBgn0022943	Cbp20
FBgn0031573	CG3407
FBgn0001222	Hsf
FBgn0038424	Fntb
FBgn0034707	MED16
FBgn0259789	zld
FBgn0031011	CG8034
FBgn0021814	Vps28
FBgn0029157	ssh
FBgn0260660	Mp
FBgn0034408	sano
FBgn0033913	CG8468
FBgn0024689	fws
FBgn0085423	GramD1B
FBgn0039767	CG2218
FBgn0261988	Gprk2
FBgn0036614	Golgin104
FBgn0266408	lncRNA_CR45048
FBgn0050015	CG30015
FBgn0035207	Herc4
FBgn0036318	Wbp2
FBgn0030680	CG8944
FBgn0040765	luna
FBgn0046888	CG31750
FBgn0038815	CG5466
FBgn0010097	gammaTub37C
FBgn0039601	CG1523
FBgn0266671	Sec6
FBgn0026323	Tak1
FBgn0038564	CG7785
FBgn0000562	egl
FBgn0050476	ave
FBgn0036291	CG10681
FBgn0037788	CAH7
FBgn0031250	Ent1
FBgn0030694	CG15602
FBgn0037660	beag
FBgn0035626	lin-28
FBgn0025864	Crag
FBgn0264785	Hph
FBgn0023081	gek
FBgn0015372	RabX1
FBgn0035159	CG13896
FBgn0028645	beat-Ib
FBgn0028693	Rpn12
FBgn0002283	l(3)73Ah
FBgn0039602	CG1647
FBgn0263980	Stacl
FBgn0285937	Rab1
FBgn0266465	GckIII
FBgn0037544	CG11035
FBgn0260972	alc
FBgn0050344	CG30344
FBgn0038755	Hs6st
FBgn0039402	Vps2
FBgn0267104	CG45544
FBgn0038682	CG5835
FBgn0050287	CG30287
FBgn0032845	CG10747
FBgn0037153	olf413
FBgn0011828	Pxn
FBgn0051457	CG31457
FBgn0028858	CG10839
FBgn0052350	Vps11
FBgn0265630	sno
FBgn0051122	CG31122
FBgn0050418	nord
FBgn0037540	Pbp95
FBgn0032157	Etl1
FBgn0286785	scb
FBgn0028476	Usp1
FBgn0040942	CG12643
FBgn0010379	Akt
FBgn0001316	klar
FBgn0028343	Ankle2
FBgn0028394	CG17834
FBgn0008635	betaCOP
FBgn0035538	DopEcR
FBgn0035917	Zasp66
FBgn0085205	CG34176
FBgn0015829	TfIIEbeta
FBgn0261570	raskol
FBgn0035229	pns
FBgn0261555	CG42673
FBgn0038809	CG16953
FBgn0027504	CG8878
FBgn0015793	Rab19
FBgn0015477	Rme-8
FBgn0027932	Akap200
FBgn0038769	Regnase-1
FBgn0035867	CG13671
FBgn0031868	Rat1
FBgn0029912	CG4557
FBgn0030330	Tango10
FBgn0032499	Uvrag
FBgn0266719	stac
FBgn0265778	PDZ-GEF
FBgn0020304	drongo
FBgn0045064	bwa
FBgn0033578	BBS4
FBgn0086408	stl
FBgn0030274	Lint-1
FBgn0034049	bdg
FBgn0025830	IntS8
FBgn0029936	CG4617
FBgn0031645	CG3036
FBgn0038651	Epg5
FBgn0026679	IntS4
FBgn0001291	Jra
FBgn0003656	sws
FBgn0259923	Septin4
FBgn0261089	Sytalpha
FBgn0030466	CG15744
FBgn0036752	Adgf-A
FBgn0028688	Rpn7
FBgn0028552	gammaSnap1
FBgn0037852	Tpc1
FBgn0264895	RapGAP1
FBgn0046258	CG12880
FBgn0031310	Vps29
FBgn0042205	CG18764
FBgn0040752	Prosap
FBgn0053970	osy
FBgn0264703	CR43972
FBgn0261550	CG42668
FBgn0032025	CG7778
FBgn0039712	CG15514
FBgn0031745	rau
FBgn0039818	CG11318
FBgn0013764	Chi
FBgn0032451	spict
FBgn0035155	RabX6
FBgn0031314	IntS14
FBgn0032017	CG7810
FBgn0004597	CycC
FBgn0053200	VepD
FBgn0000482	dor
FBgn0034491	Hsl
FBgn0003317	sax
FBgn0265988	mv
FBgn0031702	fusl
FBgn0031488	Ccdc85
FBgn0029905	Nf-YC
FBgn0266960	lncRNA_CR45411
FBgn0015283	Rpn10
FBgn0027343	fz3
FBgn0286567	gry
FBgn0038128	Ravus
FBgn0037647	RagA-B
FBgn0000163	baz
FBgn0262169	magu
FBgn0010877	l(3)05822
FBgn0030200	RabX2
FBgn0038420	CG10311
FBgn0029531	CG13362
FBgn0085442	NKAIN
FBgn0039051	CG17109
FBgn0004832	Xpac
FBgn0004657	mys
FBgn0028427	Ilk
FBgn0001297	kay
FBgn0261268	Cul3
FBgn0042106	CG18754
FBgn0023130	a6
FBgn0035142	Hipk
FBgn0000352	cos
FBgn0029994	Ldsdh1
FBgn0036454	CG17839
FBgn0033589	CG13227
FBgn0016061	side
FBgn0039530	Tusp
FBgn0266918	CG32486
FBgn0030038	CG1440
FBgn0032692	IFT46
FBgn0034946	CG3065
FBgn0031327	CG5397
FBgn0031498	CG17260
FBgn0261529	ms(2)34Fe
FBgn0030808	RhoGAP15B
FBgn0037989	ATP8B
FBgn0037448	CG15186
FBgn0062928	hpRNA_CR33940
FBgn0025681	CG3558
FBgn0264491	how
FBgn0004373	fwd
FBgn0035691	CG7386
FBgn0033720	CG13160
FBgn0052843	Dh31-R
FBgn0020369	Rpt6
FBgn0014011	Rac2
FBgn0039067	wda
FBgn0261610	CG42699
FBgn0015618	Cdk8
FBgn0039759	CG9733
FBgn0000542	ec
FBgn0024320	Npc1a
FBgn0031768	IPIP
FBgn0020278	loco
FBgn0030346	BORCS5
FBgn0036369	CG10089
FBgn0029881	pigs
FBgn0035393	CG16753
FBgn0010395	Itgbn
FBgn0036512	CG16979
FBgn0032699	CG10383
FBgn0262114	RanBPM
FBgn0035612	frm
FBgn0085451	htk
FBgn0031740	CG7239
FBgn0039396	CCAP-R
FBgn0003275	Polr2F
FBgn0028686	Rpt3
FBgn0050467	CG30467
FBgn0031457	Snx21
FBgn0039966	Rab21
FBgn0026404	Dronc
FBgn0000330	cm
FBgn0039025	Usp12-46
FBgn0027929	NimB1
FBgn0052226	Pex23
FBgn0037094	CG7611
FBgn0038053	CG18549
FBgn0030598	CG9503
FBgn0035477	CG14982
FBgn0036341	Syx13
FBgn0036987	CG5274
FBgn0004655	wapl
FBgn0010622	DCTN3-p24
FBgn0039240	CG3744
FBgn0261811	pico
FBgn0026620	tacc
FBgn0033988	pcs
FBgn0262617	Nuak
FBgn0016754	sba
FBgn0037848	Tsp86D
FBgn0004369	Ptp99A
FBgn0037378	PSMG1
FBgn0040235	c12_
FBgn0032016	Mettl14
FBgn0085400	side-V
FBgn0261274	Ero1L
FBgn0027526	Ublcp1
FBgn0261456	hpo
FBgn0037472	CG10098
FBgn0011236	ken
FBgn0025724	beta_COP
FBgn0259227	CG42327
FBgn0004133	blow
FBgn0033352	PAN2
FBgn0036801	MYPT-75D
FBgn0262103	Sik3
FBgn0036549	CG10516
FBgn0034210	Camp
FBgn0085437	CG34408
FBgn0039809	CG15547
FBgn0020224	Cbl
FBgn0028292	ric8a
FBgn0050372	Asap
FBgn0003888	betaTub60D
FBgn0085194	CG34165
FBgn0025186	ari-2
FBgn0000063	Mps1
FBgn0033400	CG2063
FBgn0039165	CG6204
FBgn0034913	Snap29
FBgn0034051	Mlf
FBgn0037265	spartin
FBgn0034186	CG8950
FBgn0011666	msi
FBgn0037722	CG8319
FBgn0020647	KrT95D
FBgn0086655	jing
FBgn0024238	Fim
FBgn0051390	MED7
FBgn0030499	CG11178
FBgn0004638	drk
FBgn0261108	Atg13
FBgn0260450	CalpC
FBgn0038853	RhoGAP93B
FBgn0033401	Cog6
FBgn0035283	CG12024
FBgn0037634	hng2
FBgn0284221	Sema5c
FBgn0036059	nudE
FBgn0032723	ssp3
FBgn0033713	CG8841
FBgn0028341	Ptpmeg2
FBgn0261385	scra
FBgn0037291	CG14662
FBgn0035249	CG17249
FBgn0022942	Cbp80
FBgn0264357	SNF4Agamma
FBgn0014024	Rnp4F
FBgn0266668	Exo84
FBgn0030286	Gapvd1
FBgn0032034	Rcd4
FBgn0034573	Sou
FBgn0027596	Kank
FBgn0038975	Nrx-1
FBgn0014029	Septin2
FBgn0041585	Orai
FBgn0037648	CG11975
FBgn0032348	CG4751
FBgn0031872	ihog
FBgn0004569	aos
FBgn0032295	CG12299
FBgn0038640	CG7706
FBgn0029693	Cmtr1
FBgn0028664	VhaM9_-c
FBgn0036365	cmb
FBgn0061469	Ube3a
FBgn0031298	Atg4a
FBgn0000719	fog
FBgn0053547	Rim
FBgn0031882	Rab30
FBgn0283503	Neurl4
FBgn0022987	qkr54B
FBgn0033677	CG8321
FBgn0033875	CG6357
FBgn0259677	CG42346
FBgn0259174	Nedd4
FBgn0000032	Acph-1
FBgn0036257	RhoGAP68F
FBgn0263776	CG43693
FBgn0262081	Csk
FBgn0031968	CG7231
FBgn0000017	Abl
FBgn0266417	ringer
FBgn0035251	Vta1
FBgn0028644	beat-Ic
FBgn0032202	REPTOR-BP
FBgn0039130	CG5854
FBgn0015794	Rab18
FBgn0037315	Cerk
FBgn0036249	CG11560
FBgn0001084	fy
FBgn0264308	CG43778
FBgn0005612	Sox14
FBgn0014163	fax
FBgn0030645	Alg14
FBgn0033890	Ctf4
FBgn0044871	Gos28
FBgn0031876	Atac1
FBgn0046247	CG5938
FBgn0015513	mbc
FBgn0000382	csw
FBgn0051158	Efa6
FBgn0260857	Bet1
FBgn0004390	RasGAP1
FBgn0051855	CG31855
FBgn0260442	rhea
FBgn0032775	CG17544
FBgn0027597	CG17712
FBgn0029970	Nek2
FBgn0034961	CG3163
FBgn0266801	CG45263
FBgn0034720	Liprin-gamma
FBgn0031611	FIG4
FBgn0050404	Tango11
FBgn0264291	Det
FBgn0024909	Taf7
FBgn0032022	CG14275
FBgn0031632	CG15628
FBgn0034644	CG10082
FBgn0267795	Frl
FBgn0261823	Asx
FBgn0030148	CG3106
FBgn0001079	fu
FBgn0010435	emp
FBgn0015296	Shc
FBgn0037933	Ho
FBgn0001104	Galphai
FBgn0264602	lncRNA_CR43951
FBgn0001276	ix
FBgn0259146	fid
FBgn0026316	Ubc10
FBgn0053512	dpr4
FBgn0052091	CG32091
FBgn0260397	Su(var)3-3
FBgn0011737	Wee1
FBgn0025185	az2
FBgn0003008	or
FBgn0046301	CG7148
FBgn0029965	Ir7b
FBgn0033539	Git
FBgn0067864	Patj
FBgn0260955	CG42587
FBgn0259741	CG42395
FBgn0037071	CG7632
FBgn0035772	Sh3beta
FBgn0023528	CG2924
FBgn0036805	Chmp1
FBgn0029928	CG3032
FBgn0039764	CG15535
FBgn0011290	Taf12
FBgn0038744	CG4733
FBgn0035689	CG7376
FBgn0267001	Ten-a
FBgn0266418	wake
FBgn0028429	I-2
FBgn0265192	Snp
FBgn0027342	fz4
FBgn0002543	robo2
FBgn0026369	Sara
FBgn0020294	ko
FBgn0038472	CG3995
FBgn0033460	Sec24AB
FBgn0032899	CG9338
FBgn0035953	CG5087
FBgn0034091	mrj
FBgn0026378	Rep
FBgn0015803	RtGEF
FBgn0264815	Pde1c
FBgn0033791	Drl-2
FBgn0035624	Eaf6
FBgn0028398	Taf10
FBgn0000635	Fas2
FBgn0033486	dmpd
FBgn0025815	Mcm6
FBgn0014859	Hr38
FBgn0024986	CG3719
FBgn0285879	disco-r
FBgn0260006	drd
FBgn0264075	tgo
FBgn0022960	vimar
FBgn0003997	hid
FBgn0038590	CG12320
FBgn0031710	Vps52
FBgn0029860	CG15891
FBgn0015295	Shark
FBgn0003231	ref(2)P
FBgn0039492	CG6051
FBgn0263346	smash
FBgn0003557	Su(dx)
FBgn0035023	ITP
FBgn0027506	EDTP
FBgn0035033	CG3548
FBgn0027335	Rip11
FBgn0263118	tx
FBgn0034599	hng1
FBgn0037621	M1BP
FBgn0038286	CG6966
FBgn0266452	CTPsyn
FBgn0037655	Kcmf1
FBgn0033316	Gle1
FBgn0030788	Sap30
FBgn0034878	pita
FBgn0035425	CG17746
FBgn0033574	Spn47C
FBgn0033556	CG12343
FBgn0026263	bip1
FBgn0035443	CG12010
FBgn0266667	Exo70
FBgn0051109	CG31109
FBgn0044826	Pak3
FBgn0000636	Fas3
FBgn0040395	Unc-76
FBgn0037705	mura
FBgn0052677	X11Lbeta
FBgn0003969	vap
FBgn0034180	Ehbp1
FBgn0052121	CG32121
FBgn0037602	SLIRP2
FBgn0038638	CG7702
FBgn0003255	rk
FBgn0027499	wde
FBgn0030809	Ubr1
FBgn0025743	mbt
FBgn0261560	Thor
FBgn0021875	Zfrp8
FBgn0023181	Orc4
FBgn0032700	CG10338
FBgn0024806	DIP2
FBgn0267821	da
FBgn0019972	Drice
FBgn0036770	Prestin
FBgn0031655	Marcal1
FBgn0259685	crb
FBgn0038578	MED17
FBgn0036359	CG14105
FBgn0031536	Cog3
FBgn0035405	CG15812
FBgn0035833	CG7565
FBgn0031914	CG5973
FBgn0042712	HBS1
FBgn0034027	CG8187
FBgn0015772	Nak
FBgn0000083	AnxB9
FBgn0005640	Eip63E
FBgn0033756	CG17760
FBgn0003169	put
FBgn0000097	aop
FBgn0265625	CG44433
FBgn0036053	iPLA2-VIA
FBgn0041604	dlp
FBgn0032297	CG17124
FBgn0028543	NimB2
FBgn0262794	CG43175
FBgn0044823	Spec2
FBgn0010382	CycE
FBgn0037702	CG8176
FBgn0033830	CG10814
FBgn0038223	Afti
FBgn0031287	CG4291
FBgn0052056	scramb1
FBgn0015799	Rbf
FBgn0085427	CG34398
FBgn0035558	CG11357
FBgn0038890	sp3
FBgn0034704	Fbxo42
FBgn0004101	bs
FBgn0051869	CG31869
FBgn0014073	Tie
FBgn0051694	Ifrd1
FBgn0037878	CG6693
FBgn0031985	mon2
FBgn0015509	Cul1
FBgn0267336	Glut4EF
FBgn0261854	aPKC
FBgn0036685	CG6664
FBgn0004387	Klp98A
FBgn0262140	CG42866
FBgn0010348	Arf79F
FBgn0033925	CG8617
FBgn0030970	CG7326
FBgn0001206	Hmr
FBgn0013953	Esp
FBgn0035036	CG4707
FBgn0035049	Mmp1
FBgn0250755	CG42233
FBgn0263197	Patronin
FBgn0034265	Snx16
FBgn0043457	CG5180
FBgn0262716	Arp3
FBgn0032979	Clamp
FBgn0032429	CG5446
FBgn0287204	Cog8
FBgn0025725	alphaCOP
FBgn0031773	Fbw5
FBgn0029944	Dok
FBgn0031752	CG9044
FBgn0037074	Tbc1d8-9
FBgn0029006	Smurf
FBgn0038303	SIDL
FBgn0036194	Dph1
FBgn0039465	Tsp97E
FBgn0010247	Parp
FBgn0026181	Rok
FBgn0032193	CG5727
FBgn0038324	CG5038
FBgn0024189	sns
FBgn0029155	Men-b
FBgn0040230	dbo
FBgn0029824	CG3726
FBgn0037556	CG9636
FBgn0039013	CG4813
FBgn0031637	mxt
FBgn0038098	CG7381
FBgn0283712	LIMK1
FBgn0086358	Tab2
FBgn0028894	GMF
FBgn0031037	CG14207
FBgn0051935	CG31935
FBgn0033438	Mmp2
FBgn0036819	Dysb
FBgn0052676	stx
FBgn0003687	Tbp
FBgn0002716	mei-W68
FBgn0031571	bark
FBgn0026376	Rgl
FBgn0030893	RhoGAP16F
FBgn0027609	morgue
FBgn0029728	CG2861
FBgn0263345	asRNA_CR43426
FBgn0030710	CG8924
FBgn0034697	GM130
FBgn0050390	Sgf29
FBgn0039108	CG10232
FBgn0052590	CG32590
FBgn0283724	Girdin
FBgn0030766	mthl1
FBgn0032197	ova
FBgn0285971	prg
FBgn0037384	dgrn
FBgn0001137	grk
FBgn0032293	Dpy-30L1
FBgn0039459	IntS12
FBgn0264560	garz
FBgn0003334	Scm
FBgn0052264	CG32264
FBgn0034503	MED8
FBgn0028708	Mst85C
FBgn0031696	Bub1
FBgn0036919	Grasp65
FBgn0033402	Myd88
FBgn0267033	mamo
FBgn0034989	CG3356
FBgn0034396	CG15097
FBgn0035866	Arl5
FBgn0037541	CG2747
FBgn0031116	CG1695
FBgn0003048	pcx
FBgn0030833	CG8915
FBgn0031649	hoe2
FBgn0010520	Bka
FBgn0035110	thoc7
FBgn0030010	CG10959
FBgn0033935	Sin1
FBgn0033033	scaf
FBgn0032264	Lip4
FBgn0039466	CG5521
FBgn0036180	Duba
FBgn0259163	CG42268
FBgn0035533	Cip4
FBgn0004811	fs(2)ltoPP43
FBgn0035715	Ist1
FBgn0039431	plum
FBgn0001202	hook
FBgn0033104	CG15237
FBgn0020389	Papss
FBgn0039788	Rpt6R
FBgn0010620	CG10939
FBgn0037468	CG1943
FBgn0039101	CG16710
FBgn0037363	Atg17
FBgn0039668	Trc8
FBgn0264940	lncRNA_CR44109
FBgn0043455	CG5986
FBgn0038862	Usp8
FBgn0036354	Poc1
FBgn0035981	CG4452
FBgn0025633	CG13366
FBgn0243516	Vrp1
FBgn0039527	CG5639
FBgn0036196	CG11658
FBgn0260942	bond
FBgn0053144	CG33144
FBgn0033996	CG11807
FBgn0020249	stck
FBgn0028704	Nckx30C
FBgn0026749	Yippee
FBgn0036985	zye
FBgn0040283	SMC1
FBgn0263072	CG43347
FBgn0024285	Srp54
FBgn0039821	CG15556
FBgn0011655	Med
FBgn0037185	CG11367
FBgn0033738	DUBAI
FBgn0032021	CG7781
FBgn0029094	asf1
FBgn0038296	CG6752
FBgn0259228	C3G
FBgn0036641	Smn
FBgn0013531	MED20
FBgn0263929	jvl
FBgn0000320	eya
FBgn0262160	CG9932
FBgn0051729	CG31729
FBgn0051111	CG31111
FBgn0001235	hth
FBgn0039863	CG1815
FBgn0000524	dx
FBgn0024555	flfl
FBgn0003310	S
FBgn0041205	key
FBgn0024836	stan
FBgn0036621	roq
FBgn0085236	CG34207
FBgn0034271	Vps50
FBgn0051151	wge
FBgn0031403	CG15387
FBgn0030791	CG9132
FBgn0016059	Sema1b
FBgn0035557	CG11353
FBgn0034068	casp
FBgn0025635	CG17829
FBgn0031304	TBC1D23
FBgn0050392	CG30392
FBgn0032681	CG10283
FBgn0032647	CG15143
FBgn0085505	lncRNA_CR40629
FBgn0004882	orb
FBgn0034577	cpa
FBgn0267644	lncRNA_CR45982
FBgn0035154	hiro
FBgn0040842	CG15212
FBgn0052703	Erk7
FBgn0016032	lbm
FBgn0036913	Usp32
FBgn0035931	CG13312
FBgn0035318	CG9018
FBgn0039257	tnc
FBgn0031006	rictor
FBgn0027950	MBD-like
FBgn0265706	lncRNA_CR44513
FBgn0003372	Sgs1
FBgn0029903	pod1
FBgn0039451	CG6420
FBgn0001311	kkv
FBgn0031762	CG9098
FBgn0035625	Blimp-1
FBgn0033212	LRR
FBgn0259244	CG42342
FBgn0031607	Secp43
FBgn0010905	Spn
FBgn0000492	Dr
FBgn0263353	CG11000
FBgn0039816	CG11317
FBgn0036577	CG13073
FBgn0029170	TwdlT
FBgn0027521	CG3679
FBgn0031700	CG14022
FBgn0024913	Actbeta
FBgn0035065	CG3589
FBgn0032005	Snx6
FBgn0265669	CG44476
FBgn0038452	CG14905
FBgn0038629	CG14304
FBgn0033593	Listericin
FBgn0032773	fon
FBgn0011674	insc
FBgn0034313	CG5726
FBgn0264324	spg
FBgn0011224	heph
FBgn0010909	msn

## Sheet: Up Pum+Not1+Pop2
FbgeneID	name.x	19 genes are upregulated by Pum and Not1 and Pop2 Knockdown
FBgn0011704	RnrS
FBgn0000180	bib
FBgn0035696	Best2
FBgn0000077	amx
FBgn0265726	Nna1
FBgn0053556	form3
FBgn0000427	dec
FBgn0013272	Gp150
FBgn0028360	Cdc7
FBgn0040334	Tsp3A
FBgn0031971	Sirup
FBgn0001085	fz
FBgn0033812	Pex13
FBgn0002973	numb
FBgn0003079	Raf
FBgn0003716	tkv
FBgn0035936	Tsp66E
FBgn0039135	CG13603
FBgn0026144	CBP
