# Supplementary material
Source: HighWire-hosted journal article supplement (doi:10.1101/rna.079813.123)
Supplement: Supplemental_TableS6.xlsx [file Supplemental_TableS6.xlsx]

## Sheet: Plate Specs
Table S6. Oligonucleotides for rRNA and 7SL ncRNA depletion
Plate Name	Well Position	Sequence Name	Sequence	Manufacturing ID	Measured Molecular Weight	Calculated Molecular Weight	OD260	nmoles	µg	Measured Concentration µM	Final Volume µL	Tm
Sheet1	A01	rRNA28S_rev_01	CCC CTA ATT AAT ATG CTT AAA TTC AGG GGG TAG TCC CAT ATG AGT TGA GGT TGT ATA TAA	290222495	18541.8	18542	15.19	25.33	470	201.03	126	65
Sheet1	A02	rRNA28S_rev_02	GCT GAA CTG TTT TCT TTT CGC TCG CCG CTA CTA AGA AAA TCC TTG TTA GTT TCT TTT CCT	290222496	18279.2	18280	14.29	26.67	488	200.53	133	68
Sheet1	A03	rRNA28S_rev_03	AGA ATA TTG ACG CTC CAT ACA CTG CAT CTC ACA TTT GCC ATA TAG ACA AAG TGA CTT AGT	290222497	18384.2	18385	12.38	21.03	387	200.29	105	67
Sheet1	A04	rRNA28S_rev_04	CAC CCT CTA TGG GTA AAT GGC CTC ATT TAA GAA GGA CTT AAA TCG TTA ATT TCT CAT ACT	290222498	18381.5	18382	13.4	23.16	426	201.39	115	66
Sheet1	A05	rRNA28S_rev_05	TCA AGC AAC ACG ACT CTT TGG AAA CAT CAT CTA GTA ATC ATT AAC GTT ATA CGG GCC TGG	290222499	18425.3	18426	13.87	23.68	436	200.68	118	68
Sheet1	A06	rRNA28S_rev_06	TCG GTC TCA TGG TTA TAT TTA GTT TTA GAT GGA GTT TAC CAC CCA CTT AGT GCT GCA CTA	290222500	18426.8	18427	15.92	27.92	514	200.86	139	67
Sheet1	A07	rRNA28S_rev_07	TAC TGT TTA ACT CTC TAT TCA GAG TTC TTT TCA ACT TTC CCT CAC GGT ACT TGT TTA CTA	290222501	18222.2	18223	15.6	28.51	520	200.77	142	65
Sheet1	A08	rRNA28S_rev_08	GAT GAA TTT TCC ATA ACG GAT ATT CAG GTT CAT CGG GCT TAA CCT CTA AGC AGT TTC ACG	290222502	18438.2	18439	12.98	22.44	414	200.36	112	67
Sheet1	A09	rRNA28S_rev_09	CCT TAT ATG GAA AAA ATG CAC ACT ATT CTC ATA ATA TTA TTT AAA TAT TAC AAT TTT AAT	290222503	18369.6	18370	13.76	22.76	418	201.42	113	60
Sheet1	A10	rRNA28S_rev_10	GGA ATA AAC TAT AAG TTA TAT TTT ATG ATA AAT TTG GTA TAT GCT AAT AGA TTA CAA TGT	290222504	18585	18586	14.13	22.66	421	200.53	113	59
Sheet1	A11	rRNA28S_rev_11	TAT CAG CAC TTT ATC AAA TTA ATA ACA TTT ATT CTG TGT TAA AAT GCA AGC AAT TTA ATT	290222505	18401.8	18402	13.07	21.9	403	200.92	109	62
Sheet1	A12	rRNA28S_rev_12	CAA TGA TAA TTA TGC CAT TAT ATA ATT CCG AAA AAT TAA CGC ACT GTA ATC ATA TAA ATC	290222506	18398.8	18399	12.59	20.57	378	201.67	102	62
Sheet1	B01	rRNA28S_rev_13	AAG GTA TCC TGA ATC TTT CGC ATT GTT AAT CAT ACA AGT GCA TAT AAT AAA CAC AAA AAT	290222507	18439.9	18440	13.01	21.33	393	201.23	106	64
Sheet1	B02	rRNA28S_rev_14	ATA TCC CAA TAA CTT GCA CAT ATG TTA GAC TCC TTG GTC CGT GTT TCA AGA CGG GTC CCG	290222508	18375.5	18376	15.91	27.98	514	201.29	139	69
Sheet1	B03	rRNA28S_rev_15	GCT ATA AAT AGC TAA AAA ACT AAT CCC ATT ATT AGT CAA GTT AAT TAC GCT ATT AGG TTT	290222509	18436.9	18437	13.96	23.1	426	200.87	115	62
Sheet1	B04	rRNA28S_rev_16	AAA TAA TAT AAA TAT ACA TTA TAC ATA ACT ATA TAG AAC GCC CCG GGA TTG TGT TAA TTA	290222510	18478.6	18479	17.18	27.45	507	200.36	137	62
Sheet1	B05	rRNA28S_rev_17	TAG TTC ACC ATC TTT CGG GTC ACA GCA TAT ATG CTC AAG GTA CGT TCC AGT TAG AGG CAT	290222511	18440.4	18440	13.68	23.64	436	200.34	118	69
Sheet1	B06	rRNA28S_rev_18	CAC GTC AGA ACT GTT TCG GTC TTC CAT CAG GGT TTC CCC TGA CTT CAA CCT GAT CAA GTA	290222512	18311.7	18312	16.8	30.15	552	201	150	70
Sheet1	B07	rRNA28S_rev_19	CAG CTA CTA GAT GGT TCG ATT GGT CTT TCG CCC CTA TAC TCA ATT CTG ACA ATC GAT TTG	290222513	18356.5	18357	14.36	25.64	471	200.31	128	67
Sheet1	B08	rRNA28S_rev_20	AGA TTA TTT TAT ATA ATA TTA AAA TGC ACC AGC TAT CCT GAG GGA AAC TTC GGA AGG AAC	290222514	18536.7	18537	16.81	27.54	510	201.02	137	65
Sheet1	B09	rRNA28S_rev_21	TTG AGA ATA GGT TAA GAT CGT TTC GAC CCT AAG GCC TCT AAT CAT TCG CTT TAC CAG ATA	290222515	18422.8	18423	16.25	27.86	513	200.43	139	67
Sheet1	B10	rRNA28S_rev_22	CAT TAT ATC ATA ACC TTG AAC TTC ATA TCA AGA AAG TTA AGG TTC TTA CCC ATT TAA AGT	290222516	18372.8	18373	14.85	24.92	458	200.97	124	63
Sheet1	B11	rRNA28S_rev_23	CAT TAC GTT TGG TTC ATC CCA CAG CGC CAG TTC TGC TTA CCA AAA GTG GCC CAC TGG GCA	290222517	18346.6	18347	16.16	29.11	534	200.76	145	73
Sheet1	B12	rRNA28S_rev_24	GTT TTA AGC AAC CAA CGC CTT TCA TGG TAT CTG CAT GAG TTG TTA ATT TGG GCA CCG TAA	290222518	18469.6	18470	17.57	30.59	565	201.25	152	69
Sheet1	C01	rRNA28S_rev_25	GGC AGG TGA GTT GTT ACA CAC TCC TTA GCG GAT TTC GAC TTC CAT GAT CAC CGT CCT GCT	290222519	18383.2	18384	14.31	25.83	475	200.23	129	71
Sheet1	C02	rRNA28S_rev_26	TTA GCG GTA ATG TAT AGG TAT ACA ACT TAA GCG CCA TCC ATT TTA AGG GCT AGT TGC TTC	290222520	18493.6	18494	17.4	29.83	552	200.2	149	67
Sheet1	C03	rRNA28S_rev_27	GTA CCT TCC TAC TCA CTA AAG TTT CAA AAT TTA TAT CAC AAG TAA TAT AAA TCA TCT ACT	290222521	18276.9	18277	15.99	26.96	493	201.19	134	62
Sheet1	C04	rRNA28S_rev_28	AGA TCT GTA CCA ATG GCA GCT CCA TGC AGG CTT ACG CCA AAC ACT TCT ACG CAT ACC ATT	290222522	18307.4	18308	16.37	28.87	529	200.49	144	71
Sheet1	C05	rRNA28S_rev_29	CGA AAC CCT TCT CCA CTT CAG TCC TCC AAG GTC TCA TTC GAT TAT TTG CTA CTA CCA CCA	290222523	18135	18136	14.19	25.96	471	201.24	129	69
Sheet1	C06	rRNA28S_rev_30	AAT TTT CGG CTT TCG CCT TGA ACT TAG GAC CGA CTA ACT CGT GAT CAA CCA CTG TTC ACA	290222524	18319.2	18320	15.25	27.17	498	201.26	135	70
Sheet1	C07	rRNA28S_rev_31	TAT TCA AGT GTA TTA TAA TTC GCT TTG TTT ATA TAG TTA GGC ATT TTT GTT TTA CTT GAA	290222525	18474.6	18475	16.84	28.97	535	201.18	144	62
Sheet1	C08	rRNA28S_rev_32	ATA ACA AAC GGA TAC TCA ACA GGT TAC GGA ATT GGA ACC GTA TTC CCT TTC GTT CAA AAT	290222526	18433.8	18434	13.43	22.6	417	200	113	67
Sheet1	C09	rRNA28S_rev_33	CTC TCG ACG GCT TCT TTA TGG TCG TTC CTG TTG CCA GGA TGA GCA CGA GGC CCA TAT TTA	290222527	18414.8	18415	18.09	32.69	602	200.55	163	71
Sheet1	C10	rRNA28S_rev_34	TCT GCG AAA GAC TTC CAT GGT AGT ACG GCT ATA AAA CAG AAA AGA AAA CTC TTC CGA TAT	290222528	18492.2	18492	13.91	23.07	427	200.61	115	67
Sheet1	C11	rRNA28S_rev_35	AGG AGA AAA TAT CGA CAC AAC AGT ATA TGT CAT GCT CTT CTA GCC CAT CTA CCA TAT CTC	290222529	18329.7	18330	15.34	26.09	478	200.69	130	66
Sheet1	C12	rRNA28S_rev_36	GGA TAT TGG TAC GGC CTG TTG AGA AGT TTG CGT GTC CCC ACC ATA AAT TTT CAA GGT CCG	290222530	18511.3	18512	15.84	27.63	512	200.22	138	70
Sheet1	D01	rRNA28S_rev_37	GAC TTC CCT TAC CTA CAT TAT TCT ATC GAC TAG AGA CTC TTC ACC TTG GAG ACC AGC TGC	290222531	18255.6	18256	14.64	26.35	481	201.15	131	68
Sheet1	D02	rRNA28S_rev_38	GCC CGA CTA TCT CAA TCT TCA GAG CCA ATC CTT ATC CCG AAG TTA CGG ATC TAA TTT GCC	290222532	18265	18265	15.31	27.31	499	200.81	136	69
Sheet1	D03	rRNA28S_rev_39	TGC TAG AAA CTC TAT TTA CCC AGA ACG AGC ACA TAA ACC ATG TTA TTG TTT CCC AAT CAA	290222533	18328.4	18329	17.67	30.15	553	201	150	67
Sheet1	D04	rRNA28S_rev_40	AGA AAG TTC CAC AAT TGG CTA CGT AAC TAA ACT ATC CGG GGA ACA AGT AAC TAA CAT AAA	290222534	18493.5	18494	16.62	26.95	498	201.12	134	66
Sheet1	D05	rRNA28S_rev_41	CGT TAT AAT TAA TAA GAA CTA ATT GGT TTA ACC CAA ATA GTA TTC TTA AAA ATT TTA GCA	290222535	18459.6	18460	14.66	23.92	442	201.01	119	61
Sheet1	D06	rRNA28S_rev_42	AAT TAG ACA GTC GGA TTC CCC AAG TCC GTG CCA GTT CTG AAT TGA TTG TTA ATT GAT AAT	290222536	18477.9	18478	16.6	28.27	522	200.5	141	67
Sheet1	D07	rRNA28S_rev_43	GCA CTG GGC AGA AAT CAC ATT GTG TCA ACA CCC GCT AGG GCC ATC ACA ATG CTT TGT TTT	290222537	18409.4	18410	15.05	26.67	491	200.53	133	71
Sheet1	D08	rRNA28S_rev_44	TCA TAG TTA CTC CCG CCG TTG ACC CGC GCT TAC TTG AAT TTC TTC ACT TTG ACA TTC AGA	290222538	18252.9	18253	17.26	31.53	576	200.83	157	69
Sheet1	D09	rRNA28S_rev_45	GTT AAT CCA TTC ATG CGC GTC ACT AAT TAG ATG ACG AGG CAT TTG GCT ACC TTA AGA GAG	290222539	18512.7	18513	13.09	22.26	412	200.54	111	68
Sheet1	D10	rRNA28S_rev_46	CAA GCC CGT TCC CTT GGC TGT GGT TTC GCT AGA TAG TAG ATA GGG ACA AGT AGG AAT CTC	290222540	18545.7	18546	15	25.85	479	200.39	129	69
Sheet1	D11	rRNA28S_rev_47	TCC TTA CAC TGC CAG ATT AGA GTC AAG CTC AAA AGG GTC TTC TTT CCC CGC TAA TTA TTC	290222541	18294.6	18295	16.7	29.8	545	200	149	68
Sheet1	D12	rRNA28S_rev_48	TTC ATT GAC GAT ACC AAA CCG AGG TCT AAT ATC TCC CAC TTA TTC TAC ACC TCT TAT GTC	290222542	18213.3	18214	15.22	27.06	493	200.44	135	66
Sheet1	E01	rRNA28S_rev_49	AGG AAA TGA TAC ACG TTC CAT TTA ATC AAG TAA GTA AGG AAA CAA TAA GAG TAG TGG TAT	290222543	18658.8	18659	16.23	25.51	476	200.87	127	64
Sheet1	E02	rRNA28S_rev_50	AAG AAG CTT GCA TCA AAA CCC AAT ACC ATA AGA TAT AAT AAA TAT ATC CGT ATA ATG GCT	290222544	18442.8	18443	15.74	25.41	469	200.08	127	64
Sheet1	E03	rRNA28S_rev_51	TGC ATC GTT TTA TTA AAG AAT TTG TTT GCG ATT ATA TAA CAA ACT CGT GAT ACT TTG ATC	290222545	18456.7	18457	16.06	27.42	506	200.15	137	64
Sheet1	E04	rRNA28S_rev_52	AAT TGG ATC ATA CCT GAG TAA TTG GAG TTA TAC CAA ATT TTC AAA TCA AAA ATA CAT AAA	290222546	18487.5	18488	16.17	25.98	480	201.4	129	63
Sheet1	E05	rRNA28S_rev_53	TCC GTT ATT ATT TGA GAG ATG TAC CGC CCC AGT CAA ACT CCC TAC CTG GCA ATG TCC TTG	290222547	18311.2	18312	13.28	23.82	436	200.17	119	70
Sheet1	E06	rRNA28S_rev_54	GCA TTT GCC CTT TTG CTC TAT GTG TGG TTT CTG TCC GCA CTG AGC TGG CCT TGG GAC ACC	290222548	18388.2	18389	16.86	31.86	586	200.38	159	73
Sheet1	E07	rRNA28S_rev_55	AAG GAT CGA TAG GCC GAG CTT TTG CTG TCC CTG TGT GTA CTG AAC ACC GAG ATC AAG TCA	290222549	18514.5	18515	17.02	29.29	542	200.62	146	71
Sheet1	E08	rRNA28S_rev_56	AAG CCA GTT ATC CCT ATG GTA ACT TTT CTG ACA CCT CTT GTT AAA AAC TCT TTA AAC CAA	290222550	18285.3	18286	16.53	28.84	527	200.28	144	66
Sheet1	E09	rRNA28S_rev_57	TAG GAA GAG CCG ACA TCG AAG GAT CAA AAA GCG ACG TCG CTA TGA ACG CTT GGC CGC CAC	290222551	18546.4	18546	16.33	27.64	513	200.29	138	73
Sheet1	E10	rRNA28S_rev_58	GCT CAC GTT CCC TTG CAT GGG TGA ACA ATC CAA CGC TTG GTG AAT TTT GCT TCA CAA TGA	290222552	18415.6	18416	18.01	32.09	591	200.56	160	71
Sheet1	E11	rRNA28S_rev_59	GCA ACA ACG TTT TGT CAT TAG TAG GGT AAA ACT AAC CTG TCT CAC GAC GGT CTA AAC CCA	290222553	18410.6	18411	16.88	28.81	530	200.07	144	68
Sheet1	E12	rRNA28S_rev_60	CAA GTA TTG TGC CAT TGG TCC GTA CCT GCG GTT CCT CTC GTA CTA CGC AGG AAT GCT GTC	290222554	18400.2	18400	18.8	34.04	626	200.24	170	71
Sheet1	F01	rRNA28S_rev_61	ACC TTA GAG GCG TTC AGG CAT AAT CCA ACG GAC GTA GCG TCA TAC CAC TGT TCG CTC GAA	290222555	18428.3	18429	15.02	25.93	478	201.01	129	71
Sheet1	F02	rRNA28S_rev_62	TTT AGA AGC CAT ACA ATG CAA ATT GCC CCT TAT TTA TCA TTG CAG TCC AGC ACG GAT ACG	290222556	18376.3	18377	15.51	26.81	493	200.07	134	68
Sheet1	F03	rRNA28S_rev_63	CAA ATT ACA TTG GCA TCA CAT CCA TTG TCG TTT ATA AAG TAA ATT ATA AAC TTT AAA TGG	290222557	18436.4	18437	10.74	17.84	329	200.45	89	63
Sheet1	F04	rRNA28S_rev_64	CTT TTA TAT GTA ACT AGC GCG GCA TCA GGT GAT CGA AGA TCC TCC CAA TTT ACT ATG TTA	290222558	18414.1	18414	16.4	28.32	522	200.85	141	67
Sheet1	F05	rRNA28S_rev_65	TTG CCT GTT ACA AAA GTC GTT TAC AAT TGA TTC TAG GCT TTG TCA TTG TAT TAA ATA ATG	290222559	18472.4	18473	13.57	23.3	430	200.86	116	64
Sheet1	F06	rRNA28S_rev_66	AAG CAA AGG ATA AGC TTC AGT GGA TCG CAG TAT GGC AGC TGC TCA ACC ACT TAC AAC ACC	290222560	18454.8	18455	15.62	26.57	490	201.29	132	71
Sheet2	A01	rRNA5S_rev_01	GCT GCT TAA TTT CGG TGA TCG GAC GAG AAC CGA TGT ATT CAG CGT GGT ATG GTC GTT GGC	290222447	18626.1	18624	13.06	22.75	424	201.33	113	71
Sheet2	A02	rRNA5S_rev_02	AGG CCA ACA ACA CGC GGT GTT CCC AAG CGG TCC CCC ATC TAA GTA CTA ACC GCG CCC GAC	290222448	18292.3	18290	12.65	22.59	413	201.7	112	75
Sheet2	A03	rRNA5S_rev_03	AGG CCA ACA ACA CGC GGT GTT CCC AAG CGG TCC CTC ATC TAA GTA CTA ACC GCG CCC GAC	290222449	18307.2	18305	12.81	22.83	418	200.26	114	74
Sheet2	A04	rRNA5.8S_rev_01	ACA CGA TGA CGC ACA GTT TGC TGC GTT CTT CAT CGA CCC ATG AGC CGA GTG ATC CAC CGC	290222450	18358.7	18357	13.98	25.03	459	200.24	125	73
Sheet2	A05	rRNA5.8S_rev_02	CAG CAT GGA CTG CGA TAT GCG TTC AAA ATG TCG ATG TTC ATG TGT CCT GCA GTT C	290222451	16948.4	16947	13.19	25.27	428	200.56	126	69
Sheet2	A06	RNA7SL_rev_01	CCA TCC CAC AAT CAG ACC TCA CAG AAG CGT GAT TAC AGA AGC TGC CAA CCT TCC AGT CGA	290222452	18298	18296	12.56	21.81	399	200.09	109	71
Sheet2	A07	RNA7SL_rev_02	TTA GTG CGG ACG TTC CGT CAA CAT GAG CTG GTC CGC TAC GCA GTA GAT CCC AGC CTC AGG	290222453	18454.8	18453	11.87	21	388	200	105	73
Sheet2	A08	RNA7SL_rev_03	CCC TCC TTA GCC AAC CTG AAT GCC ACG GAC TCC TCC ATG GCA CCC ATA TTG ATG GCA AGC	290222454	18247.6	18246	11.56	21.07	384	200.67	105	73
Sheet2	A09	RNA7SL_rev_04	CCC ACT ACT GCC TAC CAC GGG AAC TCT TGG CTG CTG GTT TTC ACC CCT GGC CCG GTT CAT	290222455	18244.3	18242	11.82	22.53	411	201.16	112	75
Sheet2	A10	RNA7SL_rev_05	AGA TTG TGG TCC AAC CAT ATC GGT TGG GCT GAT AAC GGC AGT CCA CTC CGG TAC GCT AT	290222456	18179.1	18178	12.89	22.88	416	200.7	114	72
Sheet2	A11	rRNA18S_rev_01	AGA CAT GCA TGG CTT AAT CTT TGA GAC AAG CAT ATA ACT ACT GGC AGG ATC AAC CAG AAT	290222457	18509.4	18508	13.32	22.13	410	201.18	110	68
Sheet2	A12	rRNA18S_rev_02	AAG GAA CCA TAA CTG ATA TAA TGA GCC TTT TGC GGT TTC ACT TTT AAT TCG TGT GTA CTT	290222458	18461.2	18459	15.16	26.24	484	200.31	131	66
Sheet2	B01	rRNA18S_rev_03	TTT AAT TGC ATG TAT TAG CTC TAG AAT TAC CAC AGT TAT CCA AGT AAC TGT TAA CGA TCT	290222459	18398	18396	16.41	27.94	514	201.01	139	64
Sheet2	B02	rRNA18S_rev_04	ACG ATC TTG CGA TCG CTT GGT TTT AGC CTA ATA AAA GCA CAT GTC CCA TAA GGT TCA TGT	290222460	18441.7	18439	13.53	23.46	433	200.51	117	69
Sheet2	B03	rRNA18S_rev_05	AGA TCT GTC GTC GGT ACA AGA CCA TAC GAT CTG CAT GTT ATC TAG AGT TCA ACC AAT ATA	290222461	18442.4	18441	14.47	24.23	447	200.25	121	67
Sheet2	B04	rRNA18S_rev_06	CGT TGC AAC CAT GGT AGT CCT AGA TAC TAC CAT CAA AAG TTG ATA GGG CAG ACA TTT GAA	290222462	18516.6	18515	14.58	24.31	450	200.91	121	68
Sheet2	B05	rRNA18S_rev_07	AGA TGT GGT AGC CGT TTC TCA GGC TCC CTC TCC GGA ATC GAA CCC TGA TTC CCC GTT ACC	290222463	18291.6	18290	14.4	26.38	483	201.37	131	73
Sheet2	B06	rRNA18S_rev_08	TTT TTC GTC ACT ACC TCC CCG AGC TGG GAG TGG GTA ATT TAC GCG CCT GCT GCC TTC CTT	290222464	18320.6	18318	11.31	21.36	391	201.51	106	73
Sheet2	B07	rRNA18S_rev_09	AAG GAT TTA AAG TGT ACT CAT TCC AAT TAC AGG GCC TCG GAT ATG AGT CCT GTA TTG TTA	290222465	18520	18518	17.3	29.18	540	201.24	145	67
Sheet2	B08	rRNA18S_rev_10	TTG GAG CTG GAA TTA CCG CGG CTG CTG GCA CCA GAC TTG CCC TCC AAT TGG TCC TTG TTA	290222466	18427.1	18425	15.86	28.99	534	201.32	144	74
Sheet2	B09	rRNA18S_rev_11	CCG TAT GAA GCA CAA GTT CAA CTA CGA ACG TTT TAA CCG CAA CAA CTT TAA TAT ACG CTA	290222467	18364.4	18363	15.77	26.65	489	200.38	133	67
Sheet2	B10	rRNA18S_rev_12	CCG GTA ATA CGC TTA CAT ACA TAA AGG TAT AGT ACT AAC CAC AAT TGT AAG TTG TAC TAC	290222468	18435.4	18433	16.8	27.8	512	200	139	64
Sheet2	B11	rRNA18S_rev_13	TTT TTA AAT AGG AGG AAC ATA TGA AAA GAT ACA AGT ATT TAA TCA CAT ATA AGA ACT CCA	290222469	18538.9	18537	14.54	23.01	426	200.09	115	62
Sheet2	B12	rRNA18S_rev_14	ATT TGT TCA AAG TAA TAG TAC CGG CCC ACA ATA ACA CTC GTT TAA GAG CAC TAA TGC AGG	290222470	18460.8	18459	11.63	19.46	359	200.62	97	67
Sheet2	C01	rRNA18S_rev_15	TTA TTT CAT TAT CCC ATG CAC AGA ATA TTC AGG CAT TTG AAG CCT GCT TTA AGC ACT CTA	290222472	18334.6	18333	13.43	23.52	431	201.03	117	67
Sheet2	C02	rRNA18S_rev_16	AAC TGC TTC TAT TAA TCA TTA CCT CTT GAT CTG AAA ACC AAT GAA AGC AGA ACA GAG GTC	290222473	18419.7	18418	15.64	26.38	486	201.37	131	66
Sheet2	C03	rRNA18S_rev_17	AAG TTA GTC TTA CGA CGG TCC AAG AAT TTC ACC TCT CGC GTC GTA ATA CTA ATG CCC CCA	290222474	18315.8	18314	13.39	23.42	429	200.17	117	70
Sheet2	C04	rRNA18S_rev_18	TTC GAA CCT CTA ACT TTC GTT CTT GAT TAA TGA AAA CAT CTT TGG CAA ATG CTT TCG CTT	290620258	18332.6	18330	14.26	25.67	470	200.55	128	67
Sheet2	C05	rRNA18S_rev_19	CTA CAC CCA ATT GCT AGC TGG CAT CGT TTA TGG TTA GAA CTA GGG CGG TAT CTG ATC GCC	290620259	18459.1	18457	15.13	26.7	493	200.75	133	70
Sheet2	C06	rRNA18S_rev_21	CTC CAC TCC TGG TGG TGC CCT TCC GTC AAT TCC TTT AAG TTT CAG CTT TGC AAC CAT ACT	290222477	18207.3	18205	12.78	24	437	200	120	71
Sheet2	C07	rRNA18S_rev_22	TTA CAC ACT TAT GTT CGG ACC TGG TAA GTT TTC CCG TGT TGA GTC AAA TTA AGC CGC AGG	290222478	18472.7	18471	13.56	23.68	437	200.68	118	69
Sheet2	C08	rRNA18S_rev_23	CGA ACT AAG AAC GGC CAT GCA CCA CCA CCC ATA GAT TCG AGA AAG AGC TAT CAA TCT GTC	290222479	18385.4	18384	13.63	23.14	425	201.22	115	69
Sheet2	C09	rRNA18S_rev_24	TAT CTA TTT AAT ATA TTT GAG TCT CGT TCG TTA TCG GAA TTA ACC AGA CAA ATC ACT CCA	290222480	18357.8	18356	14.78	25.12	461	200.96	125	64
Sheet2	C10	rRNA18S_rev_25	AGC ATT TTA CTG CCA ACA TGA ATG AAG GCT ACA TAA GCT TCA GCA CCA TAA TCC TGA AGA	290222481	18430	18428	11.35	19.06	351	200.63	95	68
Sheet2	C11	rRNA18S_rev_26	TTA TAA TGG GAC AAA CCA ACA GGT ACG GCT CCA CTT ACA TAA ACA CAT TCA AAC ACA ATA	290222482	18376	18374	15.07	24.84	457	200.32	124	67
Sheet2	C12	rRNA18S_rev_27	TGT TAT TGC TCA ATC TCA TTA TTG CTA GAC GCA ATT TGT CCA TTT AAG AAG CTA GTG TCC	290222483	18395.7	18395	15.41	27.05	498	200.37	135	66
Sheet2	D01	rRNA18S_rev_28	ACG TTG ATA CTT TCA TTG TAG CGC GCG TGC AGC CCA GGA CAT CTA AGG GCA TCA CAG ACC	290222484	18446.5	18445	16.53	28.81	531	200.07	144	72
Sheet2	D02	rRNA18S_rev_29	ACA ATC CCA AGC ATG AAA GTG GTT CAG CGG TTT ACC CGG ACC TCT CGG TCT AGG AAA TAC	290222485	18455.3	18453	15.5	26.64	492	200.3	133	71
Sheet2	D03	rRNA18S_rev_30	ATG CGA GTT AAT GAC TCA CAC TTA CTG GGA ATT CCA AGT TCA TGT GAA CAG TTT CAG TTC	290222486	18464.5	18463	18.06	30.98	572	201.17	154	67
Sheet2	D04	rRNA18S_rev_31	CTA AAT AAT TCA ATC GGT AGT AGC GAC GGG CGG TGT GTA CAA AGG GCA GGG ACG TAA TCA	290222487	18688.3	18686	15.9	26.08	487	200.62	130	70
Sheet2	D05	rRNA18S_rev_32	AAC TTT TGC GAA ACA ACC GTA ACA CGC AAG GCG TCA CAG TGA TCA CGT CCG GAG ACC TCA	290222488	18417.3	18416	16.33	27.94	515	201.01	139	72
Sheet2	D06	rRNA18S_rev_33	AGG TTC ACC TAC GGA AAC CTT GTT ACG ACT TTT ACT TCC TCT AAA TAA TCA AGT TCG GTC	290222489	18336.1	18334	15.45	27.13	497	200.96	135	67
Sheet2	D07	rRNA18S_rev_34	TTT TTA AAT AGG AGG AAC ATA TGA AAA AAT ACA AGT ATT TAA TCA CAT ATA AGA ACT CCA	290222490	18523.4	18521	15.46	24.44	453	200.33	122	62
Sheet2	D08	rRNA18S_rev_35	TTT TTC GTC ACT ACC TCC CCC AGC TGG GAG TGG GTA ATT TAC GCG CCT GCT GCC TTC CTT	290222491	18280.1	18278	14.91	28.31	518	200.78	141	73
