# Supplementary material
Source: HighWire-hosted journal article supplement (doi:10.1101/rna.079813.123)
Supplement: Supplemental_TableS7.xlsx [file Supplemental_TableS7.xlsx]

## Sheet: Codon Opt Gene Count
Gene numbers for codon optimality analysis in Figures 7 and 8.
Percent codon optimality:	20-30	30-40	40-50	50-60	60-70	70-80
Bin Count:	55	1202	3862	1043	195	44

## Sheet: Codon Opt 20-30
FBgn0053217			FBgn0053217	CG33217
FBgn0052350			FBgn0052350	Vps11
FBgn0262976			FBgn0262976	lawc
FBgn0035412			FBgn0035412	CG14957
FBgn0001624			FBgn0001624	dlg1
FBgn0036926			FBgn0036926	CG7646
FBgn0036419			FBgn0036419	CG13482
FBgn0052133			FBgn0052133	Ptip
FBgn0051897			FBgn0051897	CG31897
FBgn0032197			FBgn0032197	CG5694
FBgn0267365			FBgn0267365	l(2)SH0834
FBgn0051815			FBgn0051815	CG31815
FBgn0032590			FBgn0032590	CG4631
FBgn0032658			FBgn0032658	CG5681
FBgn0050343			FBgn0050343	CG30343
FBgn0040778			FBgn0040778	CG17977
FBgn0026199			FBgn0026199	myo
FBgn0039916			FBgn0039916	Ekar
FBgn0039914			FBgn0039914	mav
FBgn0039897			FBgn0039897	CG1674
FBgn0052850			FBgn0052850	CG32850
FBgn0039900			FBgn0039900	Syt7
FBgn0004859			FBgn0004859	ci
FBgn0039927			FBgn0039927	CG11155
FBgn0039925			FBgn0039925	Kif3C
FBgn0002521			FBgn0002521	pho
FBgn0039928			FBgn0039928	Cals
FBgn0011642			FBgn0011642	Zyx
FBgn0052016			FBgn0052016	4E-T
FBgn0039923			FBgn0039923	MED26
FBgn0250819			FBgn0250819	CG33521
FBgn0003741			FBgn0003741	tra
FBgn0020372			FBgn0020372	TM4SF
FBgn0046692			FBgn0046692	Stlk
FBgn0026401			FBgn0026401	Nipped-B
FBgn0260798			FBgn0260798	Gprk1
FBgn0039994			FBgn0039994	conu
FBgn0259832			FBgn0259832	CG34229
FBgn0085432			FBgn0085432	pan
FBgn0030181			FBgn0030181	CG12645
FBgn0052000			FBgn0052000	CG32000
FBgn0020660			FBgn0020660	eIF4B
FBgn0003256			FBgn0003256	rl
FBgn0020908			FBgn0020908	Scp1
FBgn0040020			FBgn0040020	MED21
FBgn0287182			FBgn0287182
FBgn0046706			FBgn0046706	Haspin
FBgn0287183			FBgn0287183
FBgn0063670			FBgn0063670	CG40228
FBgn0262123			FBgn0262123	l(2)41Ab
FBgn0087011			FBgn0087011	CG41520

## Sheet: Codon Opt 30-40
FBgn0010215		FBgn0010215	alpha-Cat
FBgn0052230		FBgn0052230	ND-MLRQ
FBgn0264492		FBgn0264492	CkIIalpha
FBgn0040372		FBgn0040372	G9a
FBgn0052817		FBgn0052817	CG32817
FBgn0029525		FBgn0029525	CG18273
FBgn0266572		FBgn0266572	ebo
FBgn0011822		FBgn0011822	pcl
FBgn0052816		FBgn0052816	CG32816
FBgn0040373		FBgn0040373	CG3038
FBgn0021764		FBgn0021764	sdk
FBgn0029531		FBgn0029531	CG13362
FBgn0040366		FBgn0040366	CG11398
FBgn0023513		FBgn0023513	CG14803
FBgn0025627		FBgn0025627	CG4194
FBgn0025626		FBgn0025626	CG4281
FBgn0027296		FBgn0027296	temp
FBgn0004861		FBgn0004861	ph-p
FBgn0024975		FBgn0024975	CG2712
FBgn0004647		FBgn0004647
FBgn0029660		FBgn0029660	CG10801
FBgn0029662		FBgn0029662	CG12206
FBgn0029656		FBgn0029656	CG10793
FBgn0029666		FBgn0029666	CG10803
FBgn0029672		FBgn0029672	CG2875
FBgn0000542		FBgn0000542	ec
FBgn0029686		FBgn0029686	CG2941
FBgn0029688		FBgn0029688	lva
FBgn0026085		FBgn0026085	dgt4
FBgn0002707		FBgn0002707	mei-9
FBgn0025387		FBgn0025387	CG12184
FBgn0029713		FBgn0029713	CG11436
FBgn0029756		FBgn0029756	CG3309
FBgn0029799		FBgn0029799	CG15772
FBgn0029801		FBgn0029801	CG15771
FBgn0029810		FBgn0029810	CG12239
FBgn0029800		FBgn0029800	lin-52
FBgn0029825		FBgn0029825	CG12728
FBgn0052756		FBgn0052756	CG32756
FBgn0026060		FBgn0026060	Mipp2
FBgn0029853		FBgn0029853	CG3781
FBgn0000524		FBgn0000524	dx
FBgn0029874		FBgn0029874	CG3342
FBgn0029878		FBgn0029878	Pat1
FBgn0028360		FBgn0028360	Cdc7
FBgn0263968		FBgn0263968	nonC
FBgn0029905		FBgn0029905	Nf-YC
FBgn0029893		FBgn0029893	CG14442
FBgn0029892		FBgn0029892	CG3184
FBgn0029914		FBgn0029914	CG4558
FBgn0261284		FBgn0261284	bou
FBgn0027342		FBgn0027342	fz4
FBgn0029942		FBgn0029942	CG2059
FBgn0024250		FBgn0024250	brk
FBgn0029945		FBgn0029945	CG18155
FBgn0022786		FBgn0022786	Hira
FBgn0029989		FBgn0029989	CG15333
FBgn0030025		FBgn0030025	CG2147
FBgn0030034		FBgn0030034	CG10555
FBgn0265464		FBgn0265464	Traf6
FBgn0030006		FBgn0030006	CG17982
FBgn0030055		FBgn0030055	CG12772
FBgn0030048		FBgn0030048	CG12112
FBgn0021767		FBgn0021767	org-1
FBgn0030039		FBgn0030039	CG12123
FBgn0026411		FBgn0026411	Lim1
FBgn0028292		FBgn0028292	ric8a
FBgn0030121		FBgn0030121	Cfp1
FBgn0000077		FBgn0000077	amx
FBgn0030090		FBgn0030090	fend
FBgn0030077		FBgn0030077	CG15365
FBgn0030137		FBgn0030137	CG15317
FBgn0030170		FBgn0030170	CG2990
FBgn0030217		FBgn0030217	CG2124
FBgn0052677		FBgn0052677	X11Lbeta
FBgn0001206		FBgn0001206	Hmr
FBgn0034570		FBgn0034570	CG10543
FBgn0034602		FBgn0034602	Lapsyn
FBgn0034627		FBgn0034627	eEFSec
FBgn0050394		FBgn0050394	CG30394
FBgn0034617		FBgn0034617	Panx
FBgn0020312		FBgn0020312	CG4050
FBgn0034643		FBgn0034643	CG10321
FBgn0050287		FBgn0050287	CG30287
FBgn0034674		FBgn0034674	CG9304
FBgn0034694		FBgn0034694	CG6613
FBgn0002715		FBgn0002715	mei-S332
FBgn0034705		FBgn0034705	CG11170
FBgn0034703		FBgn0034703	CG3045
FBgn0034697		FBgn0034697	GM130
FBgn0034687		FBgn0034687	CG11475
FBgn0053200		FBgn0053200	VepD
FBgn0034726		FBgn0034726	Mes4
FBgn0034734		FBgn0034734	CG4554
FBgn0034795		FBgn0034795	MED23
FBgn0034786		FBgn0034786	CG13531
FBgn0034804		FBgn0034804	CG3831
FBgn0034853		FBgn0034853	Ice1
FBgn0034854		FBgn0034854	Golgin245
FBgn0011236		FBgn0011236	ken
FBgn0002791		FBgn0002791	mr
FBgn0034948		FBgn0034948	PPP1R15
FBgn0050169		FBgn0050169	Brca2
FBgn0035073		FBgn0035073	CG16896
FBgn0041205		FBgn0041205	key
FBgn0004919		FBgn0004919	gol
FBgn0035109		FBgn0035109	CG13876
FBgn0035111		FBgn0035111	Dis3l2
FBgn0052476		FBgn0052476	mthl14
FBgn0027111		FBgn0027111	miple1
FBgn0029002		FBgn0029002	miple2
FBgn0004373		FBgn0004373	fwd
FBgn0024806		FBgn0024806	DIP2
FBgn0000541		FBgn0000541	E(bx)
FBgn0035110		FBgn0035110	thoc7
FBgn0027587		FBgn0027587	CG7028
FBgn0035106		FBgn0035106	rno
FBgn0035102		FBgn0035102	CG7049
FBgn0035137		FBgn0035137	CG1233
FBgn0023000		FBgn0023000	mth
FBgn0035160		FBgn0035160	hng3
FBgn0035159		FBgn0035159	CG13896
FBgn0035158		FBgn0035158	CG13895
FBgn0035152		FBgn0035152	CG3386
FBgn0035151		FBgn0035151	CG17129
FBgn0035204		FBgn0035204	CG2277
FBgn0053230		FBgn0053230	CG33230
FBgn0024510		FBgn0024510	dlt
FBgn0035247		FBgn0035247	metl
FBgn0035238		FBgn0035238	CG12104
FBgn0035295		FBgn0035295	Cnb
FBgn0002872		FBgn0002872	mu2
FBgn0035337		FBgn0035337	CG15877
FBgn0028504		FBgn0028504	CG12182
FBgn0035388		FBgn0035388	CG2162
FBgn0035445		FBgn0035445	CG12014
FBgn0035414		FBgn0035414	CG14965
FBgn0035407		FBgn0035407	Asciz
FBgn0014388		FBgn0014388	sty
FBgn0035462		FBgn0035462	IntS10
FBgn0035470		FBgn0035470	Ccz1
FBgn0035461		FBgn0035461	ntc
FBgn0042179		FBgn0042179	CG18869
FBgn0035518		FBgn0035518	CG15011
FBgn0035497		FBgn0035497	CG14995
FBgn0024179		FBgn0024179	wit
FBgn0052251		FBgn0052251	Claspin
FBgn0035540		FBgn0035540	Syx17
FBgn0035557		FBgn0035557	CG11353
FBgn0052243		FBgn0052243	CG32243
FBgn0014073		FBgn0014073	Tie
FBgn0035537		FBgn0035537	CG11342
FBgn0005775		FBgn0005775	Con
FBgn0030286		FBgn0030286	CG1657
FBgn0027259		FBgn0027259	Kmn1
FBgn0000259		FBgn0000259	CkIIbeta
FBgn0260780		FBgn0260780	wisp
FBgn0030357		FBgn0030357	Sclp
FBgn0030407		FBgn0030407	CG2543
FBgn0030418		FBgn0030418	CG4004
FBgn0052647		FBgn0052647	CG32647
FBgn0030420		FBgn0030420	CG12717
FBgn0052640		FBgn0052640	CG32640
FBgn0030466		FBgn0030466	CG15744
FBgn0030528		FBgn0030528	CG11095
FBgn0030500		FBgn0030500	Ndc80
FBgn0030555		FBgn0030555	Fbxl4
FBgn0030582		FBgn0030582	CG14411
FBgn0030625		FBgn0030625	CG5877
FBgn0000028		FBgn0000028	acj6
FBgn0030628		FBgn0030628	CG9114
FBgn0030648		FBgn0030648	CG6340
FBgn0027287		FBgn0027287	Gmap
FBgn0030675		FBgn0030675	CG8191
FBgn0030694		FBgn0030694	CG15602
FBgn0030700		FBgn0030700	CG15914
FBgn0030701		FBgn0030701	CG16952
FBgn0030704		FBgn0030704	CG15916
FBgn0030711		FBgn0030711	Rrp47
FBgn0003969		FBgn0003969	vap
FBgn0053180		FBgn0053180	Ranbp16
FBgn0260938		FBgn0260938	tay
FBgn0065035		FBgn0065035	AlkB
FBgn0026076		FBgn0026076	UBL3
FBgn0030685		FBgn0030685	Graf
FBgn0000459		FBgn0000459	disco
FBgn0285879		FBgn0285879	disco-r
FBgn0030757		FBgn0030757	CG9902
FBgn0030801		FBgn0030801	Rcp
FBgn0030803		FBgn0030803	CG4880
FBgn0027528		FBgn0027528	goe
FBgn0030838		FBgn0030838	CG5445
FBgn0052554		FBgn0052554	CG32554
FBgn0004957		FBgn0004957	por
FBgn0031001		FBgn0031001	CG7884
FBgn0031006		FBgn0031006	rictor
FBgn0027603		FBgn0027603	Ulp1
FBgn0036959		FBgn0036959	CG6951
FBgn0036967		FBgn0036967	SCCRO4
FBgn0036932		FBgn0036932	CG14184
FBgn0036909		FBgn0036909	CG15881
FBgn0013303		FBgn0013303	Nca
FBgn0036929		FBgn0036929	CG7668
FBgn0036908		FBgn0036908	TORIP
FBgn0260655		FBgn0260655	l(3)76BDm
FBgn0262517		FBgn0262517	Ltn1
FBgn0017578		FBgn0017578	Max
FBgn0036850		FBgn0036850	Gem2
FBgn0036842		FBgn0036842	CG3797
FBgn0002945		FBgn0002945	nkd
FBgn0052202		FBgn0052202	CG32202
FBgn0036811		FBgn0036811	MED11
FBgn0036815		FBgn0036815	HipHop
FBgn0036827		FBgn0036827	CG6843
FBgn0036814		FBgn0036814	CG14073
FBgn0036812		FBgn0036812	Nufip
FBgn0259791		FBgn0259791	bora
FBgn0002901		FBgn0002901	mus304
FBgn0036777		FBgn0036777	CG7341
FBgn0000568		FBgn0000568	Eip75B
FBgn0036772		FBgn0036772	CG5290
FBgn0036745		FBgn0036745	CG7484
FBgn0043025		FBgn0043025	Adgf-A2
FBgn0036746		FBgn0036746	Crtc
FBgn0036735		FBgn0036735	Edc3
FBgn0052177		FBgn0052177	Ndfip
FBgn0036714		FBgn0036714	CG7692
FBgn0052176		FBgn0052176	CG32176
FBgn0053052		FBgn0053052	CG33052
FBgn0036684		FBgn0036684	CG3764
FBgn0052163		FBgn0052163	CG32163
FBgn0036668		FBgn0036668	Zcchc7
FBgn0036624		FBgn0036624	RAF2
FBgn0036629		FBgn0036629	GluRS-m
FBgn0036621		FBgn0036621	roq
FBgn0036614		FBgn0036614	Golgin104
FBgn0036571		FBgn0036571	Strumpellin
FBgn0036580		FBgn0036580	PDCD-5
FBgn0263605		FBgn0263605	l(3)72Dn
FBgn0036565		FBgn0036565	CG5235
FBgn0015025		FBgn0015025	CkIIalpha-i1
FBgn0036536		FBgn0036536	CG12713
FBgn0036556		FBgn0036556	CG5830
FBgn0052150		FBgn0052150	CG32150
FBgn0036534		FBgn0036534	DCP2
FBgn0004396		FBgn0004396	CrebA
FBgn0041160		FBgn0041160	comm2
FBgn0036505		FBgn0036505	CG7945
FBgn0036480		FBgn0036480	Cep135
FBgn0047178		FBgn0047178	CG32147
FBgn0036483		FBgn0036483	CG12316
FBgn0036476		FBgn0036476	sstn
FBgn0036469		FBgn0036469	CG18649
FBgn0036446		FBgn0036446	CG9384
FBgn0036448		FBgn0036448	mop
FBgn0013263		FBgn0013263	Trl
FBgn0027375		FBgn0027375	RecQ5
FBgn0036395		FBgn0036395	CG17361
FBgn0036398		FBgn0036398	upSET
FBgn0036397		FBgn0036397	Nprl3
FBgn0036396		FBgn0036396	CG17359
FBgn0025874		FBgn0025874	Meics
FBgn0036374		FBgn0036374	Spt20
FBgn0036376		FBgn0036376	Liprin-beta
FBgn0036360		FBgn0036360	CG10713
FBgn0036359		FBgn0036359	CG14105
FBgn0036333		FBgn0036333	MICAL-like
FBgn0036332		FBgn0036332	CG11261
FBgn0014007		FBgn0014007	Ptp69D
FBgn0052109		FBgn0052109	CG32109
FBgn0052110		FBgn0052110	CG32110
FBgn0036317		FBgn0036317	CG10948
FBgn0260945		FBgn0260945	Atg1
FBgn0036309		FBgn0036309	Hip1
FBgn0036294		FBgn0036294	CG10654
FBgn0052104		FBgn0052104	CG32104
FBgn0011335		FBgn0011335	vers
FBgn0036248		FBgn0036248	ssp
FBgn0052099		FBgn0052099	CG32099
FBgn0036266		FBgn0036266	CG5626
FBgn0026432		FBgn0026432	Grip163
FBgn0052095		FBgn0052095	CG32095
FBgn0015278		FBgn0015278	Pi3K68D
FBgn0036186		FBgn0036186	CG6071
FBgn0064766		FBgn0064766	CG7600
FBgn0036152		FBgn0036152	CG6175
FBgn0061469		FBgn0061469	Ube3a
FBgn0036126		FBgn0036126	Irbp18
FBgn0052075		FBgn0052075	CG32075
FBgn0052069		FBgn0052069	CG32069
FBgn0010762		FBgn0010762	simj
FBgn0011802		FBgn0011802	Gem3
FBgn0036062		FBgn0036062	CG6685
FBgn0015618		FBgn0015618	Cdk8
FBgn0036036		FBgn0036036	CG14174
FBgn0035977		FBgn0035977	PGRP-LF
FBgn0052040		FBgn0052040	CG32040
FBgn0035988		FBgn0035988	CG3982
FBgn0023479		FBgn0023479	teq
FBgn0035959		FBgn0035959	CG4911
FBgn0035923		FBgn0035923	CG6511
FBgn0035890		FBgn0035890	CG13667
FBgn0010825		FBgn0010825	Gug
FBgn0024236		FBgn0024236	foi
FBgn0035916		FBgn0035916	GAPsec
FBgn0035902		FBgn0035902	CG6683
FBgn0002899		FBgn0002899	mus301
FBgn0035851		FBgn0035851	MED24
FBgn0035867		FBgn0035867	CG13671
FBgn0087039		FBgn0087039	Sbp2
FBgn0035868		FBgn0035868	CG7194
FBgn0052365		FBgn0052365	CG32365
FBgn0052368		FBgn0052368	CG32368
FBgn0010406		FBgn0010406	RNaseX25
FBgn0003041		FBgn0003041	pbl
FBgn0016694		FBgn0016694	Pdp1
FBgn0052369		FBgn0052369	CG32369
FBgn0268063		FBgn0268063	ltl
FBgn0035812		FBgn0035812	CG7457
FBgn0035805		FBgn0035805	CG7506
FBgn0035762		FBgn0035762	Rint1
FBgn0042185		FBgn0042185	MCU
FBgn0035704		FBgn0035704	Vps8
FBgn0035702		FBgn0035702	CG10147
FBgn0035689		FBgn0035689	CG7376
FBgn0035693		FBgn0035693	CG8219
FBgn0035699		FBgn0035699	CG13300
FBgn0035688		FBgn0035688	CG10289
FBgn0035674		FBgn0035674	CG13295
FBgn0040239		FBgn0040239	bc10
FBgn0035617		FBgn0035617	l(3)psg2
FBgn0283472		FBgn0283472	S6k
FBgn0035627		FBgn0035627	Sse
FBgn0003486		FBgn0003486	spo
FBgn0260856		FBgn0260856	Membrin
FBgn0035601		FBgn0035601	Uev1A
FBgn0015558		FBgn0015558	tty
FBgn0029067		FBgn0029067	Dd
FBgn0000719		FBgn0000719	fog
FBgn0031195		FBgn0031195	CG17600
FBgn0262866		FBgn0262866	S6kII
FBgn0266848		FBgn0266848	wap
FBgn0031184		FBgn0031184	CG14615
FBgn0051660		FBgn0051660	smog
FBgn0022153		FBgn0022153	l(2)k05819
FBgn0031610		FBgn0031610	CG15436
FBgn0027609		FBgn0027609	morgue
FBgn0031597		FBgn0031597	CG17612
FBgn0014033		FBgn0014033	Sr-CI
FBgn0031575		FBgn0031575	Cep97
FBgn0051957		FBgn0051957	CG31957
FBgn0051955		FBgn0051955	CG31955
FBgn0051777		FBgn0051777	CG31777
FBgn0031488		FBgn0031488	CG17265
FBgn0031494		FBgn0031494	CG17219
FBgn0243513		FBgn0243513	cnir
FBgn0031419		FBgn0031419	CG15390
FBgn0028952		FBgn0028952	Kebab
FBgn0031393		FBgn0031393	CG15382
FBgn0000097		FBgn0000097	aop
FBgn0031391		FBgn0031391	CG11723
FBgn0051922		FBgn0051922	CG31922
FBgn0031281		FBgn0031281	Saf6
FBgn0003278		FBgn0003278	RpI135
FBgn0004583		FBgn0004583	ex
FBgn0027592		FBgn0027592	MED15
FBgn0031270		FBgn0031270	CG13689
FBgn0067779		FBgn0067779	dbr
FBgn0031213		FBgn0031213	galectin
FBgn0031216		FBgn0031216	Zir
FBgn0031224		FBgn0031224	CG11454
FBgn0031229		FBgn0031229	CG3436
FBgn0016977		FBgn0016977	spen
FBgn0031231		FBgn0031231	mRpL10
FBgn0086856		FBgn0086856	CG11555
FBgn0003444		FBgn0003444	smo
FBgn0031247		FBgn0031247	CG11562
FBgn0266557		FBgn0266557	kis
FBgn0031220		FBgn0031220	CG4822
FBgn0051973		FBgn0051973	Cda5
FBgn0002121		FBgn0002121	l(2)gl
FBgn0036970		FBgn0036970	Spn77Bc
FBgn0036980		FBgn0036980	RhoBTB
FBgn0036985		FBgn0036985	zye
FBgn0036991		FBgn0036991	CG5872
FBgn0037012		FBgn0037012	Rcd2
FBgn0037008		FBgn0037008	mTerf3
FBgn0036988		FBgn0036988	CG5262
FBgn0036987		FBgn0036987	CG5274
FBgn0027565		FBgn0027565	CG5498
FBgn0037016		FBgn0037016	CG13252
FBgn0040634		FBgn0040634	CG4186
FBgn0037031		FBgn0037031	CG11456
FBgn0026371		FBgn0026371	SAK
FBgn0015239		FBgn0015239	Hr78
FBgn0037082		FBgn0037082	CG5664
FBgn0037117		FBgn0037117	CG11248
FBgn0046301		FBgn0046301	CG7148
FBgn0037120		FBgn0037120	CG11247
FBgn0037116		FBgn0037116	Als2
FBgn0037105		FBgn0037105	S1P
FBgn0037150		FBgn0037150	CG7133
FBgn0028500		FBgn0028500	Rich
FBgn0052452		FBgn0052452	CG32452
FBgn0037188		FBgn0037188	CG7369
FBgn0010830		FBgn0010830	l(3)04053
FBgn0037184		FBgn0037184	CG14450
FBgn0037205		FBgn0037205	BoYb
FBgn0037338		FBgn0037338	Snm1
FBgn0037368		FBgn0037368	CG1239
FBgn0037350		FBgn0037350	CG2911
FBgn0037340		FBgn0037340	CG14671
FBgn0010313		FBgn0010313	corto
FBgn0037291		FBgn0037291	CG14662
FBgn0004436		FBgn0004436	Ubc6
FBgn0026417		FBgn0026417	Hus1-like
FBgn0040466		FBgn0040466	Dlip2
FBgn0037234		FBgn0037234	CG9795
FBgn0037241		FBgn0037241	CG14646
FBgn0037250		FBgn0037250	CG1074
FBgn0037252		FBgn0037252	CG14650
FBgn0031655		FBgn0031655	Marcal1
FBgn0051915		FBgn0051915	CG31915
FBgn0043362		FBgn0043362	bchs
FBgn0051643		FBgn0051643	CG31643
FBgn0265778		FBgn0265778	PDZ-GEF
FBgn0031820		FBgn0031820	Daxx
FBgn0031816		FBgn0031816	CG16947
FBgn0051633		FBgn0051633	CG31633
FBgn0051635		FBgn0051635	CG31635
FBgn0031834		FBgn0031834	CG13766
FBgn0086451		FBgn0086451	l(2)k09022
FBgn0031875		FBgn0031875	CG3430
FBgn0031876		FBgn0031876	Atac1
FBgn0031874		FBgn0031874	CG13775
FBgn0031888		FBgn0031888	Pvf2
FBgn0051908		FBgn0051908	CG31908
FBgn0031914		FBgn0031914	CG5973
FBgn0031939		FBgn0031939	CG13796
FBgn0011230		FBgn0011230	poe
FBgn0031997		FBgn0031997	PGAP5
FBgn0032018		FBgn0032018	CG7806
FBgn0032017		FBgn0032017	CG7810
FBgn0285971		FBgn0285971
FBgn0032047		FBgn0032047	CG13088
FBgn0032052		FBgn0032052	PIG-U
FBgn0027490		FBgn0027490	D12
FBgn0001137		FBgn0001137	grk
FBgn0032042		FBgn0032042	CG13398
FBgn0014417		FBgn0014417	CG13397
FBgn0001084		FBgn0001084	fy
FBgn0029123		FBgn0029123	SoxN
FBgn0032100		FBgn0032100	CG13108
FBgn0011232		FBgn0011232	scat
FBgn0032135		FBgn0032135	GlcAT-S
FBgn0051710		FBgn0051710	CG31710
FBgn0014179		FBgn0014179	gcm
FBgn0032162		FBgn0032162	CG4592
FBgn0032166		FBgn0032166	CG4619
FBgn0032151		FBgn0032151	nAChRalpha6
FBgn0032150		FBgn0032150	CG13123
FBgn0032196		FBgn0032196	CG5708
FBgn0024320		FBgn0024320	Npc1a
FBgn0032192		FBgn0032192	CG5731
FBgn0051875		FBgn0051875	CG31875
FBgn0004419		FBgn0004419	me31B
FBgn0010407		FBgn0010407	Ror
FBgn0032205		FBgn0032205	CG4957
FBgn0032217		FBgn0032217	CG4972
FBgn0032223		FBgn0032223	GATAd
FBgn0019932		FBgn0019932	SamDC
FBgn0051715		FBgn0051715	CG31715
FBgn0003087		FBgn0003087	pim
FBgn0032233		FBgn0032233	dpr19
FBgn0032234		FBgn0032234	gny
FBgn0032235		FBgn0032235	CG5096
FBgn0032236		FBgn0032236	mRpS7
FBgn0051716		FBgn0051716	Cnot4
FBgn0032243		FBgn0032243	Klp31E
FBgn0032244		FBgn0032244	RfC3
FBgn0032247		FBgn0032247	CG5188
FBgn0027052		FBgn0027052	STUB1
FBgn0032252		FBgn0032252	loh
FBgn0032256		FBgn0032256	RluA-2
FBgn0026431		FBgn0026431	Grip75
FBgn0032258		FBgn0032258	CG7456
FBgn0051719		FBgn0051719	RluA-1
FBgn0032249		FBgn0032249	TBC1D16
FBgn0005683		FBgn0005683	pie
FBgn0004106		FBgn0004106	Cdk1
FBgn0032228		FBgn0032228	CG5367
FBgn0032218		FBgn0032218	CG5381
FBgn0005322		FBgn0005322	nmd
FBgn0032208		FBgn0032208	Ufd4
FBgn0260749		FBgn0260749	Utx
FBgn0032200		FBgn0032200	CG5676
FBgn0000229		FBgn0000229	bsk
FBgn0024248		FBgn0024248	chico
FBgn0032268		FBgn0032268	CG6138
FBgn0032295		FBgn0032295	CG12299
FBgn0026148		FBgn0026148	CG12253
FBgn0032329		FBgn0032329	Art8
FBgn0000018		FBgn0000018	abo
FBgn0032305		FBgn0032305	CG6700
FBgn0262647		FBgn0262647	Nup160
FBgn0020309		FBgn0020309	crol
FBgn0032377		FBgn0032377	CG14937
FBgn0027505		FBgn0027505	Rab3-GAP
FBgn0032401		FBgn0032401	Plzf
FBgn0032395		FBgn0032395	CG6734
FBgn0042127		FBgn0042127	CG18789
FBgn0051858		FBgn0051858	t-cup
FBgn0032429		FBgn0032429	CG5446
FBgn0032499		FBgn0032499	Uvrag
FBgn0032481		FBgn0032481	CG16972
FBgn0032479		FBgn0032479	CG16974
FBgn0051849		FBgn0051849	CG31849
FBgn0032521		FBgn0032521	CG7110
FBgn0032530		FBgn0032530	CG9263
FBgn0028931		FBgn0028931	CG16863
FBgn0028658		FBgn0028658	Adat1
FBgn0028875		FBgn0028875	nAChRalpha5
FBgn0259896		FBgn0259896	NimC1
FBgn0261529		FBgn0261529	ms(2)34Fe
FBgn0028530		FBgn0028530	mTTF
FBgn0028879		FBgn0028879	CG15270
FBgn0001978		FBgn0001978	stc
FBgn0045842		FBgn0045842	yuri
FBgn0283659		FBgn0283659	THG
FBgn0001990		FBgn0001990	wek
FBgn0028895		FBgn0028895	CG17328
FBgn0000307		FBgn0000307	chif
FBgn0028894		FBgn0028894	GMF
FBgn0002673		FBgn0002673	twe
FBgn0051816		FBgn0051816	CG31816
FBgn0028523		FBgn0028523	CG5888
FBgn0001185		FBgn0001185	her
FBgn0261278		FBgn0261278	grp
FBgn0267347		FBgn0267347	squ
FBgn0032598		FBgn0032598	ChLD3
FBgn0032600		FBgn0032600	BuGZ
FBgn0032603		FBgn0032603	CG17928
FBgn0004797		FBgn0004797	mdy
FBgn0022213		FBgn0022213	Cse1
FBgn0032633		FBgn0032633	Lrch
FBgn0020503		FBgn0020503	CLIP-190
FBgn0032637		FBgn0032637	CG5050
FBgn0260632		FBgn0260632	dl
FBgn0011274		FBgn0011274	Dif
FBgn0243486		FBgn0243486	rdo
FBgn0032671		FBgn0032671	CG7200
FBgn0032693		FBgn0032693	Cyp310a1
FBgn0032691		FBgn0032691	Atac2
FBgn0032681		FBgn0032681	CG10283
FBgn0032701		FBgn0032701	CG10341
FBgn0032719		FBgn0032719	CG17321
FBgn0032717		FBgn0032717	CG10600
FBgn0005617		FBgn0005617	msl-1
FBgn0015553		FBgn0015553	tos
FBgn0032728		FBgn0032728	Tango6
FBgn0032730		FBgn0032730	CG10431
FBgn0002022		FBgn0002022	Catsup
FBgn0032748		FBgn0032748	CG10492
FBgn0032750		FBgn0032750	CG10495
FBgn0051800		FBgn0051800	CG31800
FBgn0032780		FBgn0032780	CG13085
FBgn0032763		FBgn0032763	CG17568
FBgn0032791		FBgn0032791	CG18094
FBgn0032790		FBgn0032790	CG10194
FBgn0004811		FBgn0004811	fs(2)ltoPP43
FBgn0032817		FBgn0032817	CG10631
FBgn0032848		FBgn0032848	nesd
FBgn0032845		FBgn0032845	CG10747
FBgn0032877		FBgn0032877	CG2617
FBgn0032876		FBgn0032876	Cen
FBgn0010395		FBgn0010395	Itgbn
FBgn0032919		FBgn0032919	CG9253
FBgn0032934		FBgn0032934	CG8679
FBgn0024371		FBgn0024371	E2f2
FBgn0086251		FBgn0086251	del
FBgn0023090		FBgn0023090	dtr
FBgn0032946		FBgn0032946	nrv3
FBgn0032940		FBgn0032940	Mondo
FBgn0037478		FBgn0037478	CG2656
FBgn0037492		FBgn0037492	CG10050
FBgn0037491		FBgn0037491	CG1227
FBgn0037482		FBgn0037482	CG10055
FBgn0037473		FBgn0037473	CG10068
FBgn0037466		FBgn0037466	CG1965
FBgn0037435		FBgn0037435	CG18048
FBgn0037439		FBgn0037439	CG10286
FBgn0037526		FBgn0037526	ArgRS-m
FBgn0037535		FBgn0037535	PIG-H
FBgn0037540		FBgn0037540	Pbp95
FBgn0243512		FBgn0243512	puc
FBgn0037552		FBgn0037552	CG7800
FBgn0037544		FBgn0037544	CG11035
FBgn0037539		FBgn0037539	CG10435
FBgn0037583		FBgn0037583	CG9684
FBgn0037574		FBgn0037574	Coq2
FBgn0037617		FBgn0037617	nom
FBgn0037622		FBgn0037622	CG8202
FBgn0037634		FBgn0037634	hng2
FBgn0037633		FBgn0037633	CG9839
FBgn0037620		FBgn0037620	ranshi
FBgn0027503		FBgn0027503	CG11970
FBgn0037654		FBgn0037654	CG11983
FBgn0037661		FBgn0037661	Ada
FBgn0037670		FBgn0037670	Ibf1
FBgn0285911		FBgn0285911
FBgn0040534		FBgn0040534	Sf3b5
FBgn0037696		FBgn0037696	GstZ1
FBgn0037679		FBgn0037679	CG8866
FBgn0014022		FBgn0014022	Rlb1
FBgn0037703		FBgn0037703	JHDM2
FBgn0037722		FBgn0037722	CG8319
FBgn0278604		FBgn0278604	dmt
FBgn0037737		FBgn0037737	Pnn
FBgn0037757		FBgn0037757	CG8516
FBgn0037741		FBgn0037741	CG16908
FBgn0037780		FBgn0037780	ohgt
FBgn0037794		FBgn0037794	CG6254
FBgn0037792		FBgn0037792	TAF1B
FBgn0037777		FBgn0037777	CG11722
FBgn0037810		FBgn0037810	sle
FBgn0266717		FBgn0266717	Bruce
FBgn0001235		FBgn0001235	hth
FBgn0037814		FBgn0037814	CG6325
FBgn0037831		FBgn0037831	Cap-H2
FBgn0051441		FBgn0051441	CG31441
FBgn0051388		FBgn0051388	CG31388
FBgn0026315		FBgn0026315	Ugt35a
FBgn0037897		FBgn0037897	CG5270
FBgn0037901		FBgn0037901	CG6744
FBgn0042205		FBgn0042205	CG18764
FBgn0037924		FBgn0037924	CG14712
FBgn0037926		FBgn0037926	Elp1
FBgn0037944		FBgn0037944	CG6923
FBgn0002906		FBgn0002906	Blm
FBgn0037934		FBgn0037934	CG6830
FBgn0037921		FBgn0037921	CG6808
FBgn0037918		FBgn0037918	CG6791
FBgn0051211		FBgn0051211	CG31211
FBgn0260741		FBgn0260741	CG3281
FBgn0037958		FBgn0037958	CG6962
FBgn0025802		FBgn0025802	Sbf
FBgn0037949		FBgn0037949	CG17360
FBgn0051361		FBgn0051361	dpr17
FBgn0038047		FBgn0038047	CG5245
FBgn0286075		FBgn0286075
FBgn0037998		FBgn0037998	CG4848
FBgn0042207		FBgn0042207	CG18530
FBgn0002905		FBgn0002905	mus308
FBgn0038058		FBgn0038058	CG5608
FBgn0087021		FBgn0087021	Spc25
FBgn0003598		FBgn0003598	Su(var)3-7
FBgn0038129		FBgn0038129	TBC1D5
FBgn0038128		FBgn0038128	Ravus
FBgn0051469		FBgn0051469	CG31469
FBgn0038202		FBgn0038202	CG12402
FBgn0011474		FBgn0011474	PR-Set7
FBgn0024321		FBgn0024321	NK7.1
FBgn0051320		FBgn0051320	HEATR2
FBgn0003862		FBgn0003862	trx
FBgn0086686		FBgn0086686	l(3)L1231
FBgn0011217		FBgn0011217	eff
FBgn0038296		FBgn0038296	CG6752
FBgn0038290		FBgn0038290	CG6912
FBgn0038300		FBgn0038300	Mau2
FBgn0041188		FBgn0041188	Atx2
FBgn0026737		FBgn0026737	CG6171
FBgn0026634		FBgn0026634	ldlCp
FBgn0038325		FBgn0038325	Atg4b
FBgn0038311		FBgn0038311	CG14864
FBgn0038303		FBgn0038303	SIDL
FBgn0053207		FBgn0053207	pxb
FBgn0003483		FBgn0003483	spn-E
FBgn0038371		FBgn0038371	Pbp45
FBgn0000246		FBgn0000246	c(3)G
FBgn0038390		FBgn0038390	Rbf2
FBgn0003507		FBgn0003507	srp
FBgn0052856		FBgn0052856	CG32856
FBgn0040071		FBgn0040071	tara
FBgn0250823		FBgn0250823	gish
FBgn0261286		FBgn0261286	Mat89Ba
FBgn0038425		FBgn0038425	CG14881
FBgn0038437		FBgn0038437	Sdhaf3
FBgn0038454		FBgn0038454	CG10324
FBgn0266053		FBgn0266053	Patr-1
FBgn0020493		FBgn0020493	Dad
FBgn0038478		FBgn0038478	cal1
FBgn0038488		FBgn0038488	m-cup
FBgn0038472		FBgn0038472	CG3995
FBgn0025571		FBgn0025571	SF1
FBgn0038532		FBgn0038532	CG14322
FBgn0051251		FBgn0051251	CG31251
FBgn0038545		FBgn0038545	pasi1
FBgn0038547		FBgn0038547	CG17803
FBgn0038564		FBgn0038564	CG7785
FBgn0003499		FBgn0003499	sr
FBgn0010389		FBgn0010389	htl
FBgn0028499		FBgn0028499	CG7985
FBgn0010877		FBgn0010877	l(3)05822
FBgn0038588		FBgn0038588	CG7156
FBgn0038584		FBgn0038584	mTerf5
FBgn0038629		FBgn0038629	CG14304
FBgn0027841		FBgn0027841	CstF-64
FBgn0038638		FBgn0038638	CG7702
FBgn0051224		FBgn0051224	CG31224
FBgn0004876		FBgn0004876	cdi
FBgn0010768		FBgn0010768	sqz
FBgn0038704		FBgn0038704	CG5316
FBgn0260003		FBgn0260003	Dys
FBgn0086613		FBgn0086613	Ino80
FBgn0014135		FBgn0014135	bnl
FBgn0038760		FBgn0038760	MED25
FBgn0243511		FBgn0243511	psidin
FBgn0038772		FBgn0038772	mdlc
FBgn0038767		FBgn0038767	trem
FBgn0038765		FBgn0038765	CG4424
FBgn0038741		FBgn0038741	CG17186
FBgn0001169		FBgn0001169
FBgn0038829		FBgn0038829	CG17271
FBgn0038827		FBgn0038827	Fancd2
FBgn0038860		FBgn0038860	Ice2
FBgn0038866		FBgn0038866	CG5810
FBgn0046763		FBgn0046763	CG17278
FBgn0038872		FBgn0038872	Nelf-A
FBgn0038881		FBgn0038881	CG16791
FBgn0038889		FBgn0038889	Fancm
FBgn0283499		FBgn0283499	InR
FBgn0051431		FBgn0051431	CG31431
FBgn0038912		FBgn0038912	CG6656
FBgn0051174		FBgn0051174	CG31174
FBgn0015229		FBgn0015229	glec
FBgn0264490		FBgn0264490	Eip93F
FBgn0038928		FBgn0038928	Fadd
FBgn0038952		FBgn0038952	CG7069
FBgn0038953		FBgn0038953	CG18596
FBgn0051159		FBgn0051159	mRRF2
FBgn0053107		FBgn0053107	CG33107
FBgn0038968		FBgn0038968	CG12499
FBgn0039017		FBgn0039017	CG6985
FBgn0039026		FBgn0039026	CG7029
FBgn0039007		FBgn0039007	CCAP
FBgn0025781		FBgn0025781	Cdc16
FBgn0039067		FBgn0039067	wda
FBgn0039065		FBgn0039065	Rad60
FBgn0051457		FBgn0051457	CG31457
FBgn0039098		FBgn0039098	GILT3
FBgn0039115		FBgn0039115	CG10214
FBgn0047114		FBgn0047114	CG31142
FBgn0039128		FBgn0039128	CG13599
FBgn0039132		FBgn0039132	AP-1sigma
FBgn0053108		FBgn0053108	CG33108
FBgn0039158		FBgn0039158	CG6182
FBgn0026598		FBgn0026598	Apc2
FBgn0039165		FBgn0039165	CG6204
FBgn0026257		FBgn0026257	cav
FBgn0039170		FBgn0039170	CG13609
FBgn0039169		FBgn0039169	Spps
FBgn0039167		FBgn0039167	CG17786
FBgn0266282		FBgn0266282	jnj
FBgn0051133		FBgn0051133	Slimp
FBgn0039153		FBgn0039153	GatB
FBgn0053100		FBgn0053100	eIF4EHP
FBgn0039188		FBgn0039188	Golgin84
FBgn0039204		FBgn0039204	CG6607
FBgn0262167		FBgn0262167	ana1
FBgn0039210		FBgn0039210	CG13625
FBgn0039209		FBgn0039209	REPTOR
FBgn0004118		FBgn0004118	nAChRbeta2
FBgn0039249		FBgn0039249	CG11168
FBgn0039250		FBgn0039250	Mink
FBgn0027617		FBgn0027617	CG5808
FBgn0039266		FBgn0039266	CG11791
FBgn0039274		FBgn0039274	CG11920
FBgn0051510		FBgn0051510	CG31510
FBgn0051109		FBgn0051109	CG31109
FBgn0051108		FBgn0051108	CG31108
FBgn0027376		FBgn0027376	rha
FBgn0039335		FBgn0039335	Vps33B
FBgn0051439		FBgn0051439	Muc96D
FBgn0039329		FBgn0039329	CG10669
FBgn0039328		FBgn0039328	CHKov2
FBgn0039296		FBgn0039296	CG10420
FBgn0039350		FBgn0039350	jigr1
FBgn0261986		FBgn0261986	RASSF8
FBgn0039356		FBgn0039356	CG5039
FBgn0039355		FBgn0039355	CG4730
FBgn0039404		FBgn0039404	CG14543
FBgn0002592		FBgn0002592	E(spl)m2-BFM
FBgn0039417		FBgn0039417	CG6073
FBgn0039449		FBgn0039449	CG6425
FBgn0039462		FBgn0039462	CG14252
FBgn0039466		FBgn0039466	CG5521
FBgn0039467		FBgn0039467	CG14253
FBgn0003495		FBgn0003495	spz
FBgn0039508		FBgn0039508	CG3368
FBgn0039560		FBgn0039560	BOD1
FBgn0039554		FBgn0039554	CG5003
FBgn0027655		FBgn0027655	htt
FBgn0039602		FBgn0039602	CG1647
FBgn0039612		FBgn0039612	CG14523
FBgn0039631		FBgn0039631	Sirt7
FBgn0039633		FBgn0039633	CG11873
FBgn0039639		FBgn0039639	CG14512
FBgn0042213		FBgn0042213	CG18731
FBgn0039727		FBgn0039727	Vps13B
FBgn0051040		FBgn0051040	Cog7
FBgn0051202		FBgn0051202	alpha-Man-Ic
FBgn0039702		FBgn0039702	Vps16B
FBgn0039696		FBgn0039696	CG7837
FBgn0039766		FBgn0039766	CG15536
FBgn0039821		FBgn0039821	CG15556
FBgn0039816		FBgn0039816	CG11317
FBgn0039870		FBgn0039870	CG1896
FBgn0039886		FBgn0039886	CG2003
FBgn0032949		FBgn0032949	Lamp1
FBgn0032956		FBgn0032956	Cul2
FBgn0051612		FBgn0051612	CG31612
FBgn0032988		FBgn0032988	Tif-IA
FBgn0039972		FBgn0039972	CG17018
FBgn0032979		FBgn0032979	Clamp
FBgn0033060		FBgn0033060	CG7849
FBgn0033063		FBgn0033063	CG14589
FBgn0021847		FBgn0021847	l(2)k14710
FBgn0033061		FBgn0033061	SmydA-5
FBgn0033054		FBgn0033054	CG14591
FBgn0033052		FBgn0033052	SCAP
FBgn0263855		FBgn0263855	BubR1
FBgn0027507		FBgn0027507	CG1344
FBgn0033032		FBgn0033032	kune
FBgn0259978		FBgn0259978	vlc
FBgn0022288		FBgn0022288	l(2)09851
FBgn0025693		FBgn0025693	ZnT41F
FBgn0033038		FBgn0033038	CG7791
FBgn0033029		FBgn0033029	Not3
FBgn0039970		FBgn0039970	CG17508
FBgn0033028		FBgn0033028	CG11665
FBgn0050440		FBgn0050440	CG30440
FBgn0033010		FBgn0033010	Atf6
FBgn0261403		FBgn0261403	sxc
FBgn0033021		FBgn0033021	CG10417
FBgn0033017		FBgn0033017	CG10465
FBgn0033085		FBgn0033085	CG15908
FBgn0033090		FBgn0033090	CG15909
FBgn0022224		FBgn0022224	ubl
FBgn0034529		FBgn0034529	FAM21
FBgn0034528		FBgn0034528	CG11180
FBgn0034523		FBgn0034523	Nnf1a
FBgn0034498		FBgn0034498	CG16868
FBgn0034452		FBgn0034452	Oseg6
FBgn0086358		FBgn0086358	Tab2
FBgn0034442		FBgn0034442	CG11257
FBgn0034447		FBgn0034447	CG7744
FBgn0034425		FBgn0034425	CG11906
FBgn0267351		FBgn0267351	Topors
FBgn0034400		FBgn0034400	CG15099
FBgn0034380		FBgn0034380	Vps51
FBgn0063498		FBgn0063498	GstE2
FBgn0034351		FBgn0034351	rswl
FBgn0034360		FBgn0034360	CG10927
FBgn0034366		FBgn0034366	Atg7
FBgn0034310		FBgn0034310	Nup75
FBgn0022238		FBgn0022238	lolal
FBgn0034299		FBgn0034299	CG5757
FBgn0015522		FBgn0015522	olf186-M
FBgn0003701		FBgn0003701	thr
FBgn0040294		FBgn0040294	POSH
FBgn0029006		FBgn0029006	Smurf
FBgn0034249		FBgn0034249	RhoGAP54D
FBgn0034217		FBgn0034217	Lhr
FBgn0028953		FBgn0028953	CG14478
FBgn0027506		FBgn0027506	EDTP
FBgn0286070		FBgn0286070
FBgn0034210		FBgn0034210	CG6568
FBgn0263864		FBgn0263864	Dark
FBgn0023172		FBgn0023172	RhoGEF2
FBgn0034182		FBgn0034182	SmydA-7
FBgn0034183		FBgn0034183	SmydA-6
FBgn0086350		FBgn0086350	tef
FBgn0034181		FBgn0034181	CG8963
FBgn0034158		FBgn0034158	CG5522
FBgn0025830		FBgn0025830	IntS8
FBgn0026402		FBgn0026402	NiPp1
FBgn0034175		FBgn0034175	ste24b
FBgn0034140		FBgn0034140	Lst
FBgn0034113		FBgn0034113	CG8060
FBgn0050099		FBgn0050099	CG30099
FBgn0034054		FBgn0034054	CG8366
FBgn0034060		FBgn0034060	CG8370
FBgn0034071		FBgn0034071	CG8405
FBgn0014020		FBgn0014020	Rho1
FBgn0034073		FBgn0034073	CG8414
FBgn0034062		FBgn0034062	CG8388
FBgn0050089		FBgn0050089	CG30089
FBgn0034050		FBgn0034050	bug
FBgn0034049		FBgn0034049	bdg
FBgn0266708		FBgn0266708	Cep89
FBgn0050466		FBgn0050466	CG30466
FBgn0034033		FBgn0034033	CG8204
FBgn0033996		FBgn0033996	CG11807
FBgn0034000		FBgn0034000	CG11808
FBgn0004698		FBgn0004698	Xpc
FBgn0013750		FBgn0013750	Arf51F
FBgn0034009		FBgn0034009	CG8155
FBgn0034008		FBgn0034008	CG8152
FBgn0259878		FBgn0259878	Fs
FBgn0033984		FBgn0033984	Lap1
FBgn0033993		FBgn0033993	CG8089
FBgn0050476		FBgn0050476	ave
FBgn0261823		FBgn0261823	Asx
FBgn0033948		FBgn0033948	CG12863
FBgn0026427		FBgn0026427	Su(var)2-HP2
FBgn0033916		FBgn0033916	Usp20-33
FBgn0261269		FBgn0261269	conv
FBgn0033921		FBgn0033921	tej
FBgn0033900		FBgn0033900	CysRS-m
FBgn0033863		FBgn0033863	CG13337
FBgn0033871		FBgn0033871	CG13339
FBgn0033880		FBgn0033880	CG6553
FBgn0086757		FBgn0086757	cbs
FBgn0027581		FBgn0027581	CG6191
FBgn0033806		FBgn0033806	FLASH
FBgn0033813		FBgn0033813	fsd
FBgn0265623		FBgn0265623	Su(z)2
FBgn0033783		FBgn0033783	CG17019
FBgn0004435		FBgn0004435	Galphaq
FBgn0033712		FBgn0033712	mIF3
FBgn0264560		FBgn0264560	garz
FBgn0266111		FBgn0266111	ana3
FBgn0033750		FBgn0033750	CG13151
FBgn0033752		FBgn0033752	CG8569
FBgn0260012		FBgn0260012	pds5
FBgn0033652		FBgn0033652	ths
FBgn0260932		FBgn0260932	cuff
FBgn0026573		FBgn0026573	ADD1
FBgn0033672		FBgn0033672	rho-7
FBgn0033654		FBgn0033654	Sobp
FBgn0062449		FBgn0062449	CG13197
FBgn0044020		FBgn0044020	Roc2
FBgn0003396		FBgn0003396	shn
FBgn0033615		FBgn0033615	CG7741
FBgn0033616		FBgn0033616	CG7745
FBgn0001276		FBgn0001276	ix
FBgn0033609		FBgn0033609	Fbl6
FBgn0040765		FBgn0040765	luna
FBgn0033574		FBgn0033574	Spn47C
FBgn0033540		FBgn0033540	Elp2
FBgn0033549		FBgn0033549	mms4
FBgn0033551		FBgn0033551	CG7222
FBgn0050020		FBgn0050020	CG30020
FBgn0033554		FBgn0033554	Lsm10
FBgn0027499		FBgn0027499	wde
FBgn0033539		FBgn0033539	Git
FBgn0033523		FBgn0033523	CG12895
FBgn0033491		FBgn0033491	CG18011
FBgn0028426		FBgn0028426	JhI-1
FBgn0033458		FBgn0033458	CG18446
FBgn0033459		FBgn0033459	CG12744
FBgn0285892		FBgn0285892	tea
FBgn0033467		FBgn0033467	CG15863
FBgn0033460		FBgn0033460	Sec24AB
FBgn0033449		FBgn0033449	CG1663
FBgn0050001		FBgn0050001	CG30001
FBgn0016970		FBgn0016970	l(2)k10201
FBgn0050338		FBgn0050338	CG30338
FBgn0033429		FBgn0033429	CG12929
FBgn0033427		FBgn0033427	Smyd4-1
FBgn0033421		FBgn0033421	CG1888
FBgn0033376		FBgn0033376	CG8777
FBgn0033354		FBgn0033354	FANCI
FBgn0033347		FBgn0033347	CG8248
FBgn0027513		FBgn0027513	ana2
FBgn0033337		FBgn0033337	CG8272
FBgn0033316		FBgn0033316	CG14749
FBgn0033315		FBgn0033315	beta3GalTII
FBgn0015034		FBgn0015034	Cyp4e1
FBgn0033261		FBgn0033261	udd
FBgn0050383		FBgn0050383	CG30383
FBgn0050496		FBgn0050496	CG30496
FBgn0033195		FBgn0033195	CG1360
FBgn0033166		FBgn0033166	Eaf
FBgn0033134		FBgn0033134	Tsp42El
FBgn0016126		FBgn0016126	CaMKI
FBgn0004607		FBgn0004607	zfh2
FBgn0040324		FBgn0040324	Ephrin
FBgn0039911		FBgn0039911	CG1909
FBgn0025936		FBgn0025936	Eph
FBgn0024728		FBgn0024728	Slip1
FBgn0039920		FBgn0039920	CG11360
FBgn0039909		FBgn0039909	ND-49
FBgn0026869		FBgn0026869	Thd1
FBgn0026262		FBgn0026262	bip2
FBgn0039907		FBgn0039907	lgs
FBgn0024811		FBgn0024811	Crk
FBgn0262636		FBgn0262636	dati
FBgn0039902		FBgn0039902	Zip102B
FBgn0051999		FBgn0051999	CG31999
FBgn0051998		FBgn0051998	CG31998
FBgn0039890		FBgn0039890	CG2316
FBgn0039889		FBgn0039889	Arl4
FBgn0011747		FBgn0011747	Ank
FBgn0025740		FBgn0025740	PlexB
FBgn0087002		FBgn0087002	apolpp
FBgn0013749		FBgn0013749	Arf102F
FBgn0024913		FBgn0024913	Actbeta
FBgn0039929		FBgn0039929	CG11076
FBgn0025741		FBgn0025741	PlexA
FBgn0025726		FBgn0025726	unc-13
FBgn0024698		FBgn0024698	Cpsf160
FBgn0278608		FBgn0278608	Dsp1
FBgn0014342		FBgn0014342	mia
FBgn0036290		FBgn0036290	CG10638
FBgn0259481		FBgn0259481	Mob2
FBgn0021760		FBgn0021760	chb
FBgn0036640		FBgn0036640	nxf2
FBgn0035976		FBgn0035976	PGRP-LC
FBgn0026309		FBgn0026309	aft
FBgn0261885		FBgn0261885	osa
FBgn0036900		FBgn0036900	CG8765
FBgn0053493		FBgn0053493	CG33493
FBgn0053494		FBgn0053494	CG33494
FBgn0260634		FBgn0260634	eIF4G2
FBgn0000286		FBgn0000286	Cf2
FBgn0003380		FBgn0003380	Sh
FBgn0003118		FBgn0003118	pnt
FBgn0032202		FBgn0032202	REPTOR-BP
FBgn0052442		FBgn0052442	Arv1
FBgn0053170		FBgn0053170	CG33170
FBgn0053198		FBgn0053198	pen-2
FBgn0032120		FBgn0032120	CG33298
FBgn0053459		FBgn0053459	CG33459
FBgn0021761		FBgn0021761	Nup154
FBgn0026379		FBgn0026379	Pten
FBgn0039711		FBgn0039711	CG7824
FBgn0266916		FBgn0266916	Cenp-C
FBgn0020445		FBgn0020445	E23
FBgn0022361		FBgn0022361	Pur-alpha
FBgn0053509		FBgn0053509	CG33509
FBgn0261872		FBgn0261872	scaf6
FBgn0053552		FBgn0053552	CG33552
FBgn0053635		FBgn0053635	CG33635
FBgn0053969		FBgn0053969	CG33969
FBgn0053977		FBgn0053977	CG33977
FBgn0054008		FBgn0054008	CG34008
FBgn0054010		FBgn0054010	CG34010
FBgn0054051		FBgn0054051	CG34051
FBgn0000578		FBgn0000578	ena
FBgn0053095		FBgn0053095	CG33095
FBgn0085432		FBgn0085432	pan
FBgn0023416		FBgn0023416	Ac3
FBgn0032815		FBgn0032815	CG10462
FBgn0036306		FBgn0036306	CG10973
FBgn0264493		FBgn0264493	rdx
FBgn0263397		FBgn0263397	Ih
FBgn0261873		FBgn0261873	sdt
FBgn0027101		FBgn0027101	Dyrk3
FBgn0039157		FBgn0039157	Myo95E
FBgn0039924		FBgn0039924	PIP4K
FBgn0026086		FBgn0026086	Adar
FBgn0031191		FBgn0031191	Cp110
FBgn0033265		FBgn0033265	coil
FBgn0054056		FBgn0054056	CG34056
FBgn0036212		FBgn0036212	CG11597
FBgn0083940		FBgn0083940	RhoU
FBgn0025633		FBgn0025633	CG13366
FBgn0083952		FBgn0083952	CG34116
FBgn0033756		FBgn0033756	CG17760
FBgn0045035		FBgn0045035	tefu
FBgn0083968		FBgn0083968	CG34132
FBgn0036179		FBgn0036179	CG7368
FBgn0083970		FBgn0083970	CG34134
FBgn0028539		FBgn0028539	CG31731
FBgn0083973		FBgn0083973	dunk
FBgn0001222		FBgn0001222	Hsf
FBgn0263490		FBgn0263490	mld
FBgn0086711		FBgn0086711	mol
FBgn0260799		FBgn0260799	p120ctn
FBgn0033015		FBgn0033015	d4
FBgn0002566		FBgn0002566	lt
FBgn0000384		FBgn0000384	cta
FBgn0250907		FBgn0250907	Cht10
FBgn0039966		FBgn0039966	Rab21
FBgn0287187		FBgn0287187
FBgn0058045		FBgn0058045	CG40045
FBgn0058006		FBgn0058006	CG40006
FBgn0086683		FBgn0086683	Spf45
FBgn0041004		FBgn0041004	CG17715
FBgn0040011		FBgn0040011	Slmap
FBgn0262116		FBgn0262116	RNASEK
FBgn0250830		FBgn0250830	CG12547
FBgn0261387		FBgn0261387	CG17528
FBgn0040005		FBgn0040005	CG17883
FBgn0262115		FBgn0262115	CG17683
FBgn0085203		FBgn0085203	CG34174
FBgn0085212		FBgn0085212	CG34183
FBgn0085236		FBgn0085236	CG34207
FBgn0085261		FBgn0085261	CG34232
FBgn0263606		FBgn0263606	Hsc20
FBgn0085284		FBgn0085284	Blos3
FBgn0085290		FBgn0085290	CG34261
FBgn0016053		FBgn0016053	pgc
FBgn0085370		FBgn0085370	Pde11
FBgn0085387		FBgn0085387	shakB
FBgn0085407		FBgn0085407	Pvf3
FBgn0285955		FBgn0285955
FBgn0085444		FBgn0085444	mute
FBgn0085450		FBgn0085450	Snoo
FBgn0085466		FBgn0085466	CG34437
FBgn0085483		FBgn0085483	CG34454
FBgn0038816		FBgn0038816	Lrrk
FBgn0003415		FBgn0003415	skd
FBgn0004860		FBgn0004860	ph-d
FBgn0016754		FBgn0016754	sba
FBgn0023213		FBgn0023213	eIF4G1
FBgn0261793		FBgn0261793	Trf2
FBgn0028487		FBgn0028487	f-cup
FBgn0030735		FBgn0030735	CG3632
FBgn0031145		FBgn0031145	Ntf-2
FBgn0031463		FBgn0031463	G6P
FBgn0032221		FBgn0032221	Schip1
FBgn0033639		FBgn0033639	CG9003
FBgn0033649		FBgn0033649	pyr
FBgn0034240		FBgn0034240	MESR4
FBgn0035558		FBgn0035558	CG11357
FBgn0036059		FBgn0036059	nudE
FBgn0086605		FBgn0086605	CG9853
FBgn0037525		FBgn0037525	CG17816
FBgn0037753		FBgn0037753	CG12947
FBgn0037755		FBgn0037755	CG12945
FBgn0037841		FBgn0037841	CG4565
FBgn0037979		FBgn0037979	GCC185
FBgn0038269		FBgn0038269	Rrp6
FBgn0039273		FBgn0039273	shams
FBgn0040355		FBgn0040355	CG3526
FBgn0040780		FBgn0040780	Atg10
FBgn0050424		FBgn0050424	CG30424
FBgn0051140		FBgn0051140	CG31140
FBgn0052425		FBgn0052425	CG32425
FBgn0052654		FBgn0052654	Sec16
FBgn0053558		FBgn0053558	mim
FBgn0039958		FBgn0039958	CG12567
FBgn0024804		FBgn0024804	Dbp80
FBgn0260987		FBgn0260987	vtd
FBgn0039993		FBgn0039993	CG17691
FBgn0058002		FBgn0058002	ND-AGGG
FBgn0267976		FBgn0267976	Tim23
FBgn0058160		FBgn0058160	CG40160
FBgn0058191		FBgn0058191	CG40191
FBgn0267861		FBgn0267861	Maf1
FBgn0040022		FBgn0040022	Set1
FBgn0263977		FBgn0263977	Tim17b
FBgn0039955		FBgn0039955	CG41099
FBgn0035999		FBgn0035999	CG3552
FBgn0035488		FBgn0035488	CG11593
FBgn0050051		FBgn0050051	Tmem18
FBgn0053276		FBgn0053276	Urm1
FBgn0020381		FBgn0020381	Dredd
FBgn0267336		FBgn0267336	Glut4EF
FBgn0085437		FBgn0085437	CG34408
FBgn0024555		FBgn0024555	flfl
FBgn0041585		FBgn0041585	olf186-F
FBgn0284251		FBgn0284251	l(2)05287

## Sheet: Codon Opt 40-50
FBgn0260439		FBgn0260439	Pp2A-29B
FBgn0031081		FBgn0031081	Nep3
FBgn0031094		FBgn0031094	CG9578
FBgn0031093		FBgn0031093	CG9581
FBgn0031091		FBgn0031091	Phf7
FBgn0024989		FBgn0024989	CG3777
FBgn0029522		FBgn0029522	CG13373
FBgn0023536		FBgn0023536	CG3156
FBgn0004648		FBgn0004648	svr
FBgn0023535		FBgn0023535	arg
FBgn0260400		FBgn0260400	elav
FBgn0261446		FBgn0261446	CG13377
FBgn0000108		FBgn0000108	Appl
FBgn0025640		FBgn0025640	CG13369
FBgn0025635		FBgn0025635	CG17829
FBgn0001341		FBgn0001341	l(1)1Bi
FBgn0003575		FBgn0003575	su(sable)
FBgn0025634		FBgn0025634	CG13367
FBgn0025637		FBgn0025637	SkpA
FBgn0027343		FBgn0027343	fz3
FBgn0260855		FBgn0260855	Sec22
FBgn0015799		FBgn0015799	Rbf
FBgn0025639		FBgn0025639	Hmt4-20
FBgn0040339		FBgn0040339	MED22
FBgn0040337		FBgn0040337	CG3021
FBgn0040398		FBgn0040398	CG14629
FBgn0040397		FBgn0040397	CG3655
FBgn0026143		FBgn0026143	CDC45L
FBgn0040351		FBgn0040351	CG11638
FBgn0040348		FBgn0040348	CG3703
FBgn0040346		FBgn0040346	CG3704
FBgn0040367		FBgn0040367	CG11382
FBgn0024361		FBgn0024361	Tsp2A
FBgn0024987		FBgn0024987	ssx
FBgn0024985		FBgn0024985	CG11448
FBgn0027794		FBgn0027794	Lrpprc2
FBgn0027795		FBgn0027795	CG14785
FBgn0024360		FBgn0024360	MTPAP
FBgn0024366		FBgn0024366	CG11409
FBgn0028550		FBgn0028550	Atf3
FBgn0026876		FBgn0026876	CG11403
FBgn0261444		FBgn0261444	CG3638
FBgn0026872		FBgn0026872	CG14777
FBgn0025383		FBgn0025383	CG14780
FBgn0260986		FBgn0260986	mei-38
FBgn0025394		FBgn0025394	inc
FBgn0283451		FBgn0283451	br
FBgn0000482		FBgn0000482	dor
FBgn0001189		FBgn0001189	hfw
FBgn0024897		FBgn0024897	b6
FBgn0023130		FBgn0023130	a6
FBgn0052808		FBgn0052808	CG32808
FBgn0027791		FBgn0027791	O-fut2
FBgn0266284		FBgn0266284	Ns3
FBgn0014411		FBgn0014411	Vps26
FBgn0023514		FBgn0023514	CG14805
FBgn0029594		FBgn0029594	CG14806
FBgn0023509		FBgn0023509	mip130
FBgn0023510		FBgn0023510	Rbcn-3B
FBgn0023508		FBgn0023508	Ocrl
FBgn0023522		FBgn0023522	CG11596
FBgn0023521		FBgn0023521	CG3587
FBgn0025629		FBgn0025629	CG4045
FBgn0025625		FBgn0025625	Sik2
FBgn0025631		FBgn0025631	moody
FBgn0003964		FBgn0003964	usp
FBgn0023545		FBgn0023545	PIG-K
FBgn0023520		FBgn0023520	CG3857
FBgn0052801		FBgn0052801	CG32801
FBgn0052803		FBgn0052803	CG32803
FBgn0023518		FBgn0023518	trr
FBgn0026088		FBgn0026088	CG14818
FBgn0026089		FBgn0026089	CG14817
FBgn0023517		FBgn0023517	Pgam5
FBgn0023515		FBgn0023515	CG14814
FBgn0025624		FBgn0025624	CG4025
FBgn0000382		FBgn0000382	csw
FBgn0023540		FBgn0023540	CG3630
FBgn0025839		FBgn0025839	ND-B14.5A
FBgn0011576		FBgn0011576	Cyp4d2
FBgn0003116		FBgn0003116	pn
FBgn0023527		FBgn0023527	CG3071
FBgn0040389		FBgn0040389	mRpL14
FBgn0044047		FBgn0044047	Ilp6
FBgn0040392		FBgn0040392	CG14050
FBgn0023526		FBgn0023526	CG2865
FBgn0023528		FBgn0023528	CG2924
FBgn0023524		FBgn0023524	CG3078
FBgn0023525		FBgn0023525	CG3191
FBgn0000377		FBgn0000377	crn
FBgn0001330		FBgn0001330	kz
FBgn0023542		FBgn0023542	Nmd3
FBgn0023541		FBgn0023541	Cyp4d14
FBgn0013432		FBgn0013432	bcn92
FBgn0040394		FBgn0040394	CG16903
FBgn0004050		FBgn0004050
FBgn0040066		FBgn0040066	wds
FBgn0040336		FBgn0040336	Seipin
FBgn0011566		FBgn0011566	Smyd3
FBgn0011606		FBgn0011606	Klp3A
FBgn0001150		FBgn0001150	gt
FBgn0003371		FBgn0003371	sgg
FBgn0024996		FBgn0024996	eIF2Bbeta
FBgn0024997		FBgn0024997	CG2681
FBgn0024991		FBgn0024991	CG2694
FBgn0000520		FBgn0000520	dwg
FBgn0040384		FBgn0040384	CG32795
FBgn0024980		FBgn0024980	Syx4
FBgn0000376		FBgn0000376	crm
FBgn0250874		FBgn0250874	ttm50
FBgn0024973		FBgn0024973	CG2701
FBgn0024992		FBgn0024992	CG2658
FBgn0000092		FBgn0000092	CG2650
FBgn0040396		FBgn0040396	CG3939
FBgn0262656		FBgn0262656	Myc
FBgn0028746		FBgn0028746	CG18508
FBgn0003285		FBgn0003285	rst
FBgn0029664		FBgn0029664	CG10802
FBgn0015286		FBgn0015286	Rala
FBgn0029667		FBgn0029667	Gas8
FBgn0029665		FBgn0029665	CG14270
FBgn0028491		FBgn0028491	CG2930
FBgn0029687		FBgn0029687	Vap33
FBgn0029689		FBgn0029689	CG6428
FBgn0029685		FBgn0029685	CG2938
FBgn0000221		FBgn0000221	brn
FBgn0026083		FBgn0026083	tyf
FBgn0066114		FBgn0066114	GlcAT-I
FBgn0266570		FBgn0266570	CG2982
FBgn0262738		FBgn0262738	norpA
FBgn0029706		FBgn0029706	CG3626
FBgn0040907		FBgn0040907	mRpL33
FBgn0040906		FBgn0040906	CG15579
FBgn0000635		FBgn0000635	Fas2
FBgn0026080		FBgn0026080	Tip60
FBgn0029693		FBgn0029693	CG6379
FBgn0029708		FBgn0029708	CG3556
FBgn0029710		FBgn0029710	CG3568
FBgn0029712		FBgn0029712	CG15912
FBgn0029714		FBgn0029714	CG3527
FBgn0003053		FBgn0003053	peb
FBgn0025739		FBgn0025739	pon
FBgn0029718		FBgn0029718	mRpL30
FBgn0022768		FBgn0022768	Pp2C1
FBgn0262699		FBgn0262699	fzr
FBgn0025615		FBgn0025615	Torsin
FBgn0003210		FBgn0003210	rb
FBgn0011760		FBgn0011760	ctp
FBgn0029737		FBgn0029737	CG6903
FBgn0004368		FBgn0004368	Ptp4E
FBgn0029755		FBgn0029755	Sas10
FBgn0014024		FBgn0014024	Rnp4F
FBgn0263237		FBgn0263237	Cdk7
FBgn0029751		FBgn0029751	CG17764
FBgn0029750		FBgn0029750	CG3323
FBgn0284442		FBgn0284442	Mcm3
FBgn0026751		FBgn0026751	XRCC1
FBgn0010014		FBgn0010014	CanB
FBgn0029763		FBgn0029763	Usp16-45
FBgn0029768		FBgn0029768	SPR
FBgn0029771		FBgn0029771	CG12730
FBgn0026702		FBgn0026702	l(1)G0045
FBgn0263987		FBgn0263987	spoon
FBgn0028474		FBgn0028474	CG4119
FBgn0029798		FBgn0029798	CG4078
FBgn0029820		FBgn0029820	CG16721
FBgn0029822		FBgn0029822	CG12236
FBgn0029819		FBgn0029819	Usp30
FBgn0014340		FBgn0014340	mof
FBgn0029818		FBgn0029818	GAA1
FBgn0029813		FBgn0029813	CG15766
FBgn0013987		FBgn0013987	MAPk-Ak2
FBgn0261383		FBgn0261383	IntS6
FBgn0052758		FBgn0052758	CG32758
FBgn0053080		FBgn0053080	CG33080
FBgn0027564		FBgn0027564	CG3149
FBgn0029789		FBgn0029789	PGAP1
FBgn0046687		FBgn0046687	Tre1
FBgn0029783		FBgn0029783	Sirt4
FBgn0029824		FBgn0029824	CG3726
FBgn0029826		FBgn0029826	CG6041
FBgn0029843		FBgn0029843	Nep1
FBgn0029837		FBgn0029837	Tsp5D
FBgn0003302		FBgn0003302	rux
FBgn0015818		FBgn0015818	Spx
FBgn0028982		FBgn0028982	Spt6
FBgn0029857		FBgn0029857	wuho
FBgn0029858		FBgn0029858	mldr
FBgn0029861		FBgn0029861	CG3815
FBgn0029866		FBgn0029866	CG3842
FBgn0029873		FBgn0029873	CG3918
FBgn0043796		FBgn0043796	CG12219
FBgn0040918		FBgn0040918	schlank
FBgn0029881		FBgn0029881	pigs
FBgn0062413		FBgn0062413	Ctr1A
FBgn0025815		FBgn0025815	Mcm6
FBgn0029895		FBgn0029895	CG14441
FBgn0029502		FBgn0029502	COQ7
FBgn0029906		FBgn0029906	xit
FBgn0003390		FBgn0003390	shf
FBgn0029896		FBgn0029896	CG3168
FBgn0029887		FBgn0029887	CG3198
FBgn0029885		FBgn0029885	CG3224
FBgn0029882		FBgn0029882	CG3226
FBgn0029924		FBgn0029924	CG4586
FBgn0029932		FBgn0029932	CG4607
FBgn0029937		FBgn0029937	CG8300
FBgn0029936		FBgn0029936	CG4617
FBgn0029935		FBgn0029935	CG4615
FBgn0029928		FBgn0029928	CG3032
FBgn0027106		FBgn0027106	Inx7
FBgn0004646		FBgn0004646	ogre
FBgn0029925		FBgn0029925	CG3040
FBgn0052732		FBgn0052732	CG32732
FBgn0029915		FBgn0029915	CG14434
FBgn0029913		FBgn0029913	Cht11
FBgn0029911		FBgn0029911	CG14435
FBgn0029944		FBgn0029944	Dok
FBgn0026144		FBgn0026144	CBP
FBgn0029943		FBgn0029943	Atg5
FBgn0025549		FBgn0025549	unc-119
FBgn0029957		FBgn0029957	CG12155
FBgn0029959		FBgn0029959	Rab39
FBgn0029958		FBgn0029958	Pdp
FBgn0027553		FBgn0027553	NELF-B
FBgn0029504		FBgn0029504	CHES-1-like
FBgn0040087		FBgn0040087	p115
FBgn0010292		FBgn0010292	bys
FBgn0029976		FBgn0029976	snz
FBgn0004657		FBgn0004657	mys
FBgn0040319		FBgn0040319	Gclc
FBgn0029997		FBgn0029997	CG2258
FBgn0029996		FBgn0029996	UbcE2H
FBgn0029992		FBgn0029992	Upf2
FBgn0004656		FBgn0004656	fs(1)h
FBgn0029990		FBgn0029990	CG2233
FBgn0003656		FBgn0003656	sws
FBgn0027280		FBgn0027280	l(1)G0193
FBgn0029980		FBgn0029980	CG10778
FBgn0029974		FBgn0029974	dpr14
FBgn0029970		FBgn0029970	Nek2
FBgn0029999		FBgn0029999	CG1575
FBgn0030003		FBgn0030003	CG2116
FBgn0030004		FBgn0030004	CG10958
FBgn0030008		FBgn0030008	CG2129
FBgn0030010		FBgn0030010	CG10959
FBgn0030012		FBgn0030012	CG18262
FBgn0030030		FBgn0030030	CG1636
FBgn0030035		FBgn0030035	PIG-T
FBgn0030028		FBgn0030028	Corp
FBgn0030026		FBgn0030026	sni
FBgn0030018		FBgn0030018	slpr
FBgn0030011		FBgn0030011	Gbeta5
FBgn0030007		FBgn0030007	alpha-PheRS
FBgn0025800		FBgn0025800	Smox
FBgn0023506		FBgn0023506	Es2
FBgn0030049		FBgn0030049	Trf4-1
FBgn0030052		FBgn0030052	CG12065
FBgn0030053		FBgn0030053	CG12081
FBgn0025864		FBgn0025864	Crag
FBgn0027864		FBgn0027864	Ogg1
FBgn0030057		FBgn0030057	Ppt1
FBgn0030054		FBgn0030054	Caf1-180
FBgn0026679		FBgn0026679	IntS4
FBgn0030040		FBgn0030040	CG15347
FBgn0030037		FBgn0030037	Miga
FBgn0041629		FBgn0041629	Hexo2
FBgn0030063		FBgn0030063	CG1789
FBgn0030065		FBgn0030065	CG12075
FBgn0030067		FBgn0030067	Rbm13
FBgn0030073		FBgn0030073	CG10962
FBgn0011586		FBgn0011586	e(r)
FBgn0030066		FBgn0030066	CG1885
FBgn0011661		FBgn0011661	Moe
FBgn0027330		FBgn0027330	l(1)G0020
FBgn0052707		FBgn0052707	APC4
FBgn0030088		FBgn0030088	Arfrp1
FBgn0030091		FBgn0030091	CG7065
FBgn0030093		FBgn0030093	Bap111
FBgn0040467		FBgn0040467	Dlip1
FBgn0026206		FBgn0026206	mei-P26
FBgn0030100		FBgn0030100	CG12106
FBgn0010269		FBgn0010269	Dsor1
FBgn0030122		FBgn0030122	CG16892
FBgn0040234		FBgn0040234	c12.2
FBgn0040236		FBgn0040236	c11.1
FBgn0052703		FBgn0052703	Erk7
FBgn0260789		FBgn0260789	mxc
FBgn0030109		FBgn0030109	CG12121
FBgn0030101		FBgn0030101	CG12118
FBgn0030096		FBgn0030096	Zpr1
FBgn0030092		FBgn0030092	fh
FBgn0030081		FBgn0030081	CG7246
FBgn0001186		FBgn0001186	Hex-A
FBgn0030141		FBgn0030141	Gga
FBgn0264691		FBgn0264691	Lst8
FBgn0052698		FBgn0052698	CG32698
FBgn0261617		FBgn0261617	nej
FBgn0030174		FBgn0030174	CG15312
FBgn0030189		FBgn0030189	CG2909
FBgn0028480		FBgn0028480	CG17841
FBgn0000711		FBgn0000711	flw
FBgn0030206		FBgn0030206	CG2889
FBgn0030208		FBgn0030208	PPP4R2r
FBgn0052687		FBgn0052687	CG32687
FBgn0261710		FBgn0261710	nocte
FBgn0028331		FBgn0028331	l(1)G0289
FBgn0040942		FBgn0040942	CG12643
FBgn0052685		FBgn0052685	ZAP3
FBgn0030228		FBgn0030228	BTBD9
FBgn0052675		FBgn0052675	Tango5
FBgn0030230		FBgn0030230	Rph
FBgn0052676		FBgn0052676	stx
FBgn0030222		FBgn0030222	CG9806
FBgn0030218		FBgn0030218	CG1628
FBgn0034572		FBgn0034572	CG9346
FBgn0034577		FBgn0034577	cpa
FBgn0034579		FBgn0034579	mRpL54
FBgn0034578		FBgn0034578	CG15653
FBgn0003391		FBgn0003391	shg
FBgn0034573		FBgn0034573	CG3295
FBgn0001133		FBgn0001133	grau
FBgn0050291		FBgn0050291	CG30291
FBgn0011674		FBgn0011674	insc
FBgn0016984		FBgn0016984	sktl
FBgn0026582		FBgn0026582	Hmg-2
FBgn0034599		FBgn0034599	hng1
FBgn0003162		FBgn0003162	Pu
FBgn0003891		FBgn0003891	tud
FBgn0034611		FBgn0034611	MFS16
FBgn0034618		FBgn0034618	CG9485
FBgn0020306		FBgn0020306	dom
FBgn0034628		FBgn0034628	Acox57D-p
FBgn0034629		FBgn0034629	Acox57D-d
FBgn0034626		FBgn0034626	CG10795
FBgn0000395		FBgn0000395	cv-2
FBgn0034614		FBgn0034614	CG9752
FBgn0050390		FBgn0050390	Sgf29
FBgn0050392		FBgn0050392	CG30392
FBgn0034606		FBgn0034606	ASPP
FBgn0261067		FBgn0261067	LSm1
FBgn0050389		FBgn0050389	CG30389
FBgn0034590		FBgn0034590	Magi
FBgn0034585		FBgn0034585	Rbpn-5
FBgn0026369		FBgn0026369	Sara
FBgn0003731		FBgn0003731	Egfr
FBgn0034641		FBgn0034641	mahj
FBgn0034642		FBgn0034642	CG15674
FBgn0034644		FBgn0034644	CG10082
FBgn0034654		FBgn0034654	eIF3k
FBgn0050285		FBgn0050285	CG30285
FBgn0003687		FBgn0003687	Tbp
FBgn0016641		FBgn0016641	PTP-ER
FBgn0042180		FBgn0042180	CG18870
FBgn0034638		FBgn0034638	CG10433
FBgn0010415		FBgn0010415	Sdc
FBgn0034657		FBgn0034657	LBR
FBgn0050404		FBgn0050404	Tango11
FBgn0067102		FBgn0067102	GlcT-1
FBgn0034691		FBgn0034691	Synj
FBgn0029147		FBgn0029147	NtR
FBgn0034704		FBgn0034704	CG6758
FBgn0034706		FBgn0034706	CG11275
FBgn0034707		FBgn0034707	MED16
FBgn0034708		FBgn0034708	Vps35
FBgn0025186		FBgn0025186	ari-2
FBgn0020307		FBgn0020307	dve
FBgn0243516		FBgn0243516	Vrp1
FBgn0034689		FBgn0034689	CG2921
FBgn0034688		FBgn0034688	CG11474
FBgn0034722		FBgn0034722	Rtf1
FBgn0025878		FBgn0025878	wrapper
FBgn0034723		FBgn0034723	CG13506
FBgn0034725		FBgn0034725	CG6044
FBgn0034733		FBgn0034733	CG4752
FBgn0034735		FBgn0034735	CG4610
FBgn0034736		FBgn0034736	gas
FBgn0260866		FBgn0260866	dnr1
FBgn0003175		FBgn0003175	px
FBgn0034727		FBgn0034727	mRpS29
FBgn0022986		FBgn0022986	qkr58E-1
FBgn0034724		FBgn0034724	babos
FBgn0034720		FBgn0034720	Liprin-gamma
FBgn0017482		FBgn0017482	T3dh
FBgn0053143		FBgn0053143	CG33143
FBgn0026261		FBgn0026261	bonsai
FBgn0034761		FBgn0034761	CG4250
FBgn0034763		FBgn0034763	RYBP
FBgn0004896		FBgn0004896	fd59A
FBgn0034793		FBgn0034793	asrij
FBgn0034796		FBgn0034796	CG3700
FBgn0267823		FBgn0267823	Gmer
FBgn0034792		FBgn0034792	YME1L
FBgn0034791		FBgn0034791	EMC8-9
FBgn0000405		FBgn0000405	CycB
FBgn0020257		FBgn0020257	Ppa
FBgn0040091		FBgn0040091	Ugt58Fa
FBgn0034750		FBgn0034750	CG3732
FBgn0019949		FBgn0019949	Cdk9
FBgn0034748		FBgn0034748	CG17807
FBgn0034797		FBgn0034797	nahoda
FBgn0034803		FBgn0034803	CG9849
FBgn0034814		FBgn0034814	CG9890
FBgn0010622		FBgn0010622	DCTN3-p24
FBgn0010660		FBgn0010660	Nup214
FBgn0034858		FBgn0034858	eIF2Bdelta
FBgn0034859		FBgn0034859	CG3520
FBgn0003977		FBgn0003977	vir
FBgn0034849		FBgn0034849	CG3500
FBgn0034870		FBgn0034870	CG13559
FBgn0261786		FBgn0261786	mi
FBgn0010501		FBgn0010501	Dcp-1
FBgn0015277		FBgn0015277	Pi3K59F
FBgn0015903		FBgn0015903	apt
FBgn0004795		FBgn0004795	retn
FBgn0016762		FBgn0016762	angel
FBgn0034893		FBgn0034893	mRpL43
FBgn0013548		FBgn0013548	l(2)dtl
FBgn0011297		FBgn0011297	l(2)not
FBgn0034894		FBgn0034894	sigmar
FBgn0050183		FBgn0050183	CG30183
FBgn0034878		FBgn0034878	pita
FBgn0034908		FBgn0034908	CG5543
FBgn0262619		FBgn0262619	DNA-ligI
FBgn0263667		FBgn0263667	Lpt
FBgn0034928		FBgn0034928	CG13562
FBgn0261794		FBgn0261794	kcc
FBgn0034931		FBgn0034931	CG2812
FBgn0034939		FBgn0034939	thoc5
FBgn0003008		FBgn0003008	or
FBgn0034946		FBgn0034946	CG3065
FBgn0005612		FBgn0005612	Sox14
FBgn0034959		FBgn0034959	CG11388
FBgn0034961		FBgn0034961	CG3163
FBgn0034962		FBgn0034962	MAN1
FBgn0034964		FBgn0034964	IntS1
FBgn0285952		FBgn0285952
FBgn0028552		FBgn0028552	gammaSnap1
FBgn0011726		FBgn0011726	tsr
FBgn0034963		FBgn0034963	Not11
FBgn0013764		FBgn0013764	Chi
FBgn0061198		FBgn0061198	HSPC300
FBgn0034958		FBgn0034958	CG3907
FBgn0034951		FBgn0034951	CG3860
FBgn0034945		FBgn0034945	CG10904
FBgn0034940		FBgn0034940	CG16787
FBgn0034938		FBgn0034938	CG3803
FBgn0034935		FBgn0034935	Orcokinin
FBgn0034933		FBgn0034933	CG3735
FBgn0034925		FBgn0034925	CG5339
FBgn0034921		FBgn0034921	DCP1
FBgn0025336		FBgn0025336	CG4882
FBgn0025335		FBgn0025335	CG4585
FBgn0004581		FBgn0004581	bgcn
FBgn0034913		FBgn0034913	Snap29
FBgn0028411		FBgn0028411	Nxt1
FBgn0086129		FBgn0086129	snama
FBgn0034975		FBgn0034975	enok
FBgn0021875		FBgn0021875	Zfrp8
FBgn0015544		FBgn0015544	spag
FBgn0034985		FBgn0034985	CG3328
FBgn0266083		FBgn0266083	ocm
FBgn0034989		FBgn0034989	CG3356
FBgn0050418		FBgn0050418	nord
FBgn0034997		FBgn0034997	CG3376
FBgn0005636		FBgn0005636	nvy
FBgn0004101		FBgn0004101	bs
FBgn0005638		FBgn0005638	slbo
FBgn0034982		FBgn0034982	CG4065
FBgn0041582		FBgn0041582	tamo
FBgn0034976		FBgn0034976	CG4049
FBgn0023081		FBgn0023081	gek
FBgn0035024		FBgn0035024	CG11414
FBgn0035025		FBgn0035025	uri
FBgn0035027		FBgn0035027	CG3511
FBgn0035033		FBgn0035033	CG3548
FBgn0035035		FBgn0035035	CG3570
FBgn0035039		FBgn0035039	Adck
FBgn0015040		FBgn0015040	Cyp9c1
FBgn0035044		FBgn0035044	CG3663
FBgn0035047		FBgn0035047	Pof
FBgn0260456		FBgn0260456	CG4806
FBgn0035036		FBgn0035036	CG4707
FBgn0035026		FBgn0035026	Fcp1
FBgn0284252		FBgn0284252	Letm1
FBgn0035001		FBgn0035001	Slik
FBgn0050421		FBgn0050421	Usp15-31
FBgn0035065		FBgn0035065	CG3589
FBgn0000157		FBgn0000157	Dll
FBgn0035085		FBgn0035085	CG3770
FBgn0035088		FBgn0035088	CG3776
FBgn0035091		FBgn0035091	CG3829
FBgn0004055		FBgn0004055	uzip
FBgn0287873		FBgn0287873
FBgn0010435		FBgn0010435	emp
FBgn0027599		FBgn0027599	CG2790
FBgn0035084		FBgn0035084	CG15861
FBgn0035082		FBgn0035082	CG2811
FBgn0060296		FBgn0060296	pain
FBgn0035076		FBgn0035076	Ance-5
FBgn0023181		FBgn0023181	Orc4
FBgn0015801		FBgn0015801	Reg-5
FBgn0035064		FBgn0035064	TyrRS-m
FBgn0035060		FBgn0035060	Eps-15
FBgn0027590		FBgn0027590	GstE12
FBgn0020386		FBgn0020386	Pdk1
FBgn0027786		FBgn0027786	Mtch
FBgn0035107		FBgn0035107	mri
FBgn0024945		FBgn0024945	NitFhit
FBgn0053229		FBgn0053229	CG33229
FBgn0035122		FBgn0035122	mRpL17
FBgn0035121		FBgn0035121	Tudor-SN
FBgn0025592		FBgn0025592	Gk1
FBgn0263988		FBgn0263988	Dic61B
FBgn0035140		FBgn0035140	CG17180
FBgn0035142		FBgn0035142	Hipk
FBgn0035145		FBgn0035145	MED14
FBgn0035150		FBgn0035150	Rev1
FBgn0035149		FBgn0035149	MED30
FBgn0016715		FBgn0016715	Reg-2
FBgn0035144		FBgn0035144	Kah
FBgn0265574		FBgn0265574	Cdc5
FBgn0052344		FBgn0052344	CG32344
FBgn0000575		FBgn0000575	emc
FBgn0035167		FBgn0035167	Gr61a
FBgn0035168		FBgn0035168	cep290
FBgn0052479		FBgn0052479	Usp10
FBgn0035162		FBgn0035162	Sf3b3
FBgn0025676		FBgn0025676	CkIIalpha-i3
FBgn0035157		FBgn0035157	CG13894
FBgn0260862		FBgn0260862	Vti1a
FBgn0052483		FBgn0052483	CG32483
FBgn0035153		FBgn0035153	ebd1
FBgn0035181		FBgn0035181	CG9205
FBgn0035186		FBgn0035186	CG13912
FBgn0040281		FBgn0040281	Aplip1
FBgn0025525		FBgn0025525	bab2
FBgn0004870		FBgn0004870	bab1
FBgn0024277		FBgn0024277	trio
FBgn0283500		FBgn0283500	Sac1
FBgn0262937		FBgn0262937	Rabex-5
FBgn0035205		FBgn0035205	Ctr9
FBgn0035207		FBgn0035207	Sherpa
FBgn0011361		FBgn0011361	ND-ACP
FBgn0035209		FBgn0035209	msd1
FBgn0010786		FBgn0010786	l(3)02640
FBgn0029514		FBgn0029514	312
FBgn0261243		FBgn0261243	Psa
FBgn0035227		FBgn0035227	Iml1
FBgn0011204		FBgn0011204	cue
FBgn0043458		FBgn0043458	CG12084
FBgn0035213		FBgn0035213	CG2199
FBgn0035211		FBgn0035211	CG2211
FBgn0035210		FBgn0035210	msd5
FBgn0035206		FBgn0035206	CG9186
FBgn0035194		FBgn0035194	Psf1
FBgn0004378		FBgn0004378	Klp61F
FBgn0035229		FBgn0035229	pns
FBgn0041342		FBgn0041342	Pcyt1
FBgn0035231		FBgn0035231	Pcyt2
FBgn0035233		FBgn0035233	Pex10
FBgn0035237		FBgn0035237	CG13917
FBgn0035244		FBgn0035244	ABCB7
FBgn0035248		FBgn0035248	CG13919
FBgn0035254		FBgn0035254	CG7974
FBgn0035257		FBgn0035257	CG12011
FBgn0035268		FBgn0035268	CG8001
FBgn0027903		FBgn0027903	CG12018
FBgn0035272		FBgn0035272	mRpL46
FBgn0025820		FBgn0025820	JTBR
FBgn0035270		FBgn0035270	CG13933
FBgn0027594		FBgn0027594	drpr
FBgn0035262		FBgn0035262	CG18171
FBgn0035253		FBgn0035253	CG7971
FBgn0035249		FBgn0035249	CG17249
FBgn0025725		FBgn0025725	alphaCOP
FBgn0035241		FBgn0035241	CG12105
FBgn0035235		FBgn0035235	CG7879
FBgn0035232		FBgn0035232	CG12099
FBgn0035228		FBgn0035228	CG12091
FBgn0035283		FBgn0035283	CG12024
FBgn0015359		FBgn0015359	CG2034
FBgn0035334		FBgn0035334	CG8993
FBgn0035336		FBgn0035336	CG9004
FBgn0035333		FBgn0035333	CG1317
FBgn0000543		FBgn0000543	ecd
FBgn0015360		FBgn0015360	oxt
FBgn0035346		FBgn0035346	CG1146
FBgn0016794		FBgn0016794	dos
FBgn0035355		FBgn0035355	CG16985
FBgn0035356		FBgn0035356	CG16986
FBgn0027082		FBgn0027082	ProRS-m
FBgn0011828		FBgn0011828	Pxn
FBgn0010909		FBgn0010909	msn
FBgn0044452		FBgn0044452	Atg2
FBgn0035375		FBgn0035375	pgant6
FBgn0035383		FBgn0035383	CPT2
FBgn0052484		FBgn0052484	Sk2
FBgn0052485		FBgn0052485	CG32485
FBgn0035392		FBgn0035392	CG1271
FBgn0035397		FBgn0035397	CG11486
FBgn0266918		FBgn0266918	CG32486
FBgn0035372		FBgn0035372	CG12093
FBgn0035401		FBgn0035401	CG1291
FBgn0035405		FBgn0035405	CG15812
FBgn0024194		FBgn0024194	rasp
FBgn0052280		FBgn0052280	CG32280
FBgn0052281		FBgn0052281	CG32281
FBgn0283724		FBgn0283724	Girdin
FBgn0035421		FBgn0035421	CG12034
FBgn0035423		FBgn0035423	eIF1
FBgn0035428		FBgn0035428	CG14960
FBgn0035439		FBgn0035439	CG14961
FBgn0004167		FBgn0004167	kst
FBgn0035440		FBgn0035440	CG14969
FBgn0035437		FBgn0035437	Strip
FBgn0035425		FBgn0035425	CG17746
FBgn0035415		FBgn0035415	CG14966
FBgn0035400		FBgn0035400	CG11537
FBgn0026189		FBgn0026189	prominin-like
FBgn0035449		FBgn0035449	CG14971
FBgn0035464		FBgn0035464	PIG-B
FBgn0035469		FBgn0035469	CG14977
FBgn0041147		FBgn0041147	ida
FBgn0004880		FBgn0004880	scrt
FBgn0035475		FBgn0035475	CG10866
FBgn0052262		FBgn0052262	CG32262
FBgn0263832		FBgn0263832	Rcd5
FBgn0035498		FBgn0035498	Fit1
FBgn0028484		FBgn0028484	Ack
FBgn0035501		FBgn0035501	CG1299
FBgn0040696		FBgn0040696	CG18675
FBgn0035515		FBgn0035515	CG14997
FBgn0011692		FBgn0011692	pav
FBgn0035517		FBgn0035517	CG1265
FBgn0035523		FBgn0035523	CG1311
FBgn0015829		FBgn0015829	TfIIEbeta
FBgn0041630		FBgn0041630	Hexo1
FBgn0035524		FBgn0035524	CG11583
FBgn0041171		FBgn0041171	ago
FBgn0028664		FBgn0028664	VhaM9.7-c
FBgn0035505		FBgn0035505	Teh2
FBgn0004516		FBgn0004516	Gad1
FBgn0016013		FBgn0016013	Faa
FBgn0035539		FBgn0035539	slow
FBgn0035542		FBgn0035542	DOR
FBgn0035574		FBgn0035574	RhoGEF64C
FBgn0027085		FBgn0027085	LeuRS-m
FBgn0261797		FBgn0261797	Dhc64C
FBgn0035571		FBgn0035571	CG12493
FBgn0030237		FBgn0030237	CG15209
FBgn0030239		FBgn0030239	CG17333
FBgn0030240		FBgn0030240	CG2202
FBgn0030243		FBgn0030243	CG2186
FBgn0030246		FBgn0030246	CG1582
FBgn0030245		FBgn0030245	CG1637
FBgn0030242		FBgn0030242	sofe
FBgn0030241		FBgn0030241	feo
FBgn0003321		FBgn0003321	sbr
FBgn0052669		FBgn0052669	CG32669
FBgn0285926		FBgn0285926
FBgn0030271		FBgn0030271	CG15202
FBgn0030274		FBgn0030274	Lint-1
FBgn0030291		FBgn0030291	CG1738
FBgn0030293		FBgn0030293	CG1737
FBgn0000499		FBgn0000499	dsh
FBgn0004864		FBgn0004864	hop
FBgn0001491		FBgn0001491	l(1)10Bb
FBgn0261277		FBgn0261277	rtv
FBgn0030268		FBgn0030268	Klp10A
FBgn0030266		FBgn0030266	CG11122
FBgn0027359		FBgn0027359	Tim8
FBgn0001624		FBgn0001624	dlg1
FBgn0030301		FBgn0030301	HP5
FBgn0030305		FBgn0030305	Uba5
FBgn0030314		FBgn0030314	CG11696
FBgn0002948		FBgn0002948	nod
FBgn0030318		FBgn0030318	rho-4
FBgn0030321		FBgn0030321	CG1703
FBgn0002723		FBgn0002723	Met
FBgn0004370		FBgn0004370	Ptp10D
FBgn0030323		FBgn0030323	CG2371
FBgn0030320		FBgn0030320	CG2247
FBgn0030319		FBgn0030319	CG2533
FBgn0003277		FBgn0003277	RpII215
FBgn0030330		FBgn0030330	Tango10
FBgn0030334		FBgn0030334	Karl
FBgn0000259		FBgn0000259	CkIIbeta
FBgn0030352		FBgn0030352	sicily
FBgn0250871		FBgn0250871	pot
FBgn0030354		FBgn0030354	Upf1
FBgn0030346		FBgn0030346	CG11802
FBgn0030344		FBgn0030344	CG2025
FBgn0030342		FBgn0030342	CG10347
FBgn0030341		FBgn0030341	p24-1
FBgn0030336		FBgn0030336	CG1578
FBgn0004511		FBgn0004511	dy
FBgn0030328		FBgn0030328	Amun
FBgn0030327		FBgn0030327	FucT6
FBgn0030364		FBgn0030364	CG15735
FBgn0030373		FBgn0030373	CG12721
FBgn0030366		FBgn0030366	Usp7
FBgn0043001		FBgn0043001	Chrac-16
FBgn0030396		FBgn0030396	CG2556
FBgn0030403		FBgn0030403	CG1824
FBgn0283712		FBgn0283712	LIMK1
FBgn0030391		FBgn0030391	Rab40
FBgn0030411		FBgn0030411	CG2540
FBgn0011837		FBgn0011837	Tis11
FBgn0030433		FBgn0030433	mRpL49
FBgn0030435		FBgn0030435	CG4645
FBgn0030431		FBgn0030431	CG4407
FBgn0052649		FBgn0052649	CG32649
FBgn0020513		FBgn0020513	ade5
FBgn0030410		FBgn0030410	Aven
FBgn0086675		FBgn0086675	fne
FBgn0261524		FBgn0261524	lic
FBgn0030447		FBgn0030447	CG2200
FBgn0030451		FBgn0030451	CG15717
FBgn0030452		FBgn0030452	MFS10
FBgn0030456		FBgn0030456	CG4332
FBgn0030457		FBgn0030457	CG12096
FBgn0030460		FBgn0030460	CG2453
FBgn0030459		FBgn0030459	CG12723
FBgn0025463		FBgn0025463	Bap60
FBgn0010303		FBgn0010303	hep
FBgn0000346		FBgn0000346	comt
FBgn0030465		FBgn0030465	CG15743
FBgn0030474		FBgn0030474	CG15747
FBgn0030477		FBgn0030477	dmrt11E
FBgn0030480		FBgn0030480	Tim9a
FBgn0030484		FBgn0030484	GstT4
FBgn0030486		FBgn0030486	Set2
FBgn0030467		FBgn0030467	CG1764
FBgn0030501		FBgn0030501	BthD
FBgn0030505		FBgn0030505	NFAT
FBgn0030507		FBgn0030507	CG11164
FBgn0030511		FBgn0030511	CG11158
FBgn0002878		FBgn0002878	mus101
FBgn0030518		FBgn0030518	CG11134
FBgn0020909		FBgn0020909	Rtc1
FBgn0261244		FBgn0261244	inaE
FBgn0027537		FBgn0027537	Nup93-1
FBgn0030530		FBgn0030530	jub
FBgn0030529		FBgn0030529	Clic
FBgn0001612		FBgn0001612	Grip91
FBgn0001087		FBgn0001087
FBgn0030514		FBgn0030514	CG9941
FBgn0030512		FBgn0030512	CG9940
FBgn0030506		FBgn0030506	Lig4
FBgn0030504		FBgn0030504	CG2691
FBgn0030502		FBgn0030502	tth
FBgn0030545		FBgn0030545	CG11590
FBgn0026713		FBgn0026713	l(1)G0007
FBgn0030554		FBgn0030554	CG1434
FBgn0030569		FBgn0030569	CG9411
FBgn0030556		FBgn0030556	mRNA-cap
FBgn0030571		FBgn0030571	CG14414
FBgn0030573		FBgn0030573	nmdyn-D6
FBgn0015774		FBgn0015774	NetB
FBgn0266710		FBgn0266710	hog
FBgn0030574		FBgn0030574	CG9413
FBgn0052594		FBgn0052594	be
FBgn0030603		FBgn0030603	CG5541
FBgn0030612		FBgn0030612	CG5599
FBgn0030611		FBgn0030611	CG15027
FBgn0264389		FBgn0264389	opm
FBgn0030600		FBgn0030600	hiw
FBgn0030598		FBgn0030598	CG9503
FBgn0030592		FBgn0030592	CG9514
FBgn0052590		FBgn0052590	CG32590
FBgn0030584		FBgn0030584	CG14407
FBgn0030581		FBgn0030581	CG14408
FBgn0003301		FBgn0003301	rut
FBgn0015926		FBgn0015926	dah
FBgn0026428		FBgn0026428	HDAC6
FBgn0030638		FBgn0030638	CG11655
FBgn0030645		FBgn0030645	CG6308
FBgn0030660		FBgn0030660	CG8097
FBgn0030668		FBgn0030668	CG8128
FBgn0030671		FBgn0030671	CG8134
FBgn0030673		FBgn0030673	CG15601
FBgn0003463		FBgn0003463	sog
FBgn0030659		FBgn0030659	CG9215
FBgn0030655		FBgn0030655	CG9213
FBgn0030654		FBgn0030654	CG15643
FBgn0267977		FBgn0267977	mh
FBgn0030642		FBgn0030642	CG15642
FBgn0004391		FBgn0004391	shtd
FBgn0040285		FBgn0040285	Scamp
FBgn0030674		FBgn0030674	CG8184
FBgn0026666		FBgn0026666	MagR
FBgn0030679		FBgn0030679	CG8206
FBgn0030683		FBgn0030683	CG8239
FBgn0030686		FBgn0030686	mRpL3
FBgn0030692		FBgn0030692	mRpS30
FBgn0026374		FBgn0026374	Rhp
FBgn0030699		FBgn0030699	CG8578
FBgn0001105		FBgn0001105	Gbeta13F
FBgn0003392		FBgn0003392	shi
FBgn0030717		FBgn0030717	CG8931
FBgn0030719		FBgn0030719	eIF5
FBgn0030718		FBgn0030718	ND-20
FBgn0030716		FBgn0030716	CG9170
FBgn0030703		FBgn0030703	MSBP
FBgn0027093		FBgn0027093	ArgRS
FBgn0000319		FBgn0000319	Chc
FBgn0030695		FBgn0030695	PGRP-LE
FBgn0030693		FBgn0030693	CG8974
FBgn0025809		FBgn0025809	Paf-AHalpha
FBgn0030691		FBgn0030691	Efhc1.1
FBgn0030678		FBgn0030678	CG11679
FBgn0011741		FBgn0011741	Arp6
FBgn0000536		FBgn0000536	eas
FBgn0052579		FBgn0052579	CG32579
FBgn0260450		FBgn0260450	CalpC
FBgn0003416		FBgn0003416	sl
FBgn0005411		FBgn0005411	U2af50
FBgn0030742		FBgn0030742	CG9919
FBgn0030740		FBgn0030740	CG9917
FBgn0052576		FBgn0052576	CG32576
FBgn0040207		FBgn0040207	kat80
FBgn0028397		FBgn0028397	Tob
FBgn0030724		FBgn0030724	Nipsnap
FBgn0026575		FBgn0026575	hang
FBgn0030753		FBgn0030753	rngo
FBgn0267384		FBgn0267384	Ubc7
FBgn0025743		FBgn0025743	mbt
FBgn0026181		FBgn0026181	Rok
FBgn0030761		FBgn0030761	CG9784
FBgn0011742		FBgn0011742	Arp2
FBgn0285944		FBgn0285944
FBgn0030749		FBgn0030749	AnxB11
FBgn0010416		FBgn0010416	TH1
FBgn0030744		FBgn0030744	CG9992
FBgn0030766		FBgn0030766	mthl1
FBgn0030786		FBgn0030786	mRpL22
FBgn0030790		FBgn0030790	CG4768
FBgn0030792		FBgn0030792	CG4789
FBgn0030796		FBgn0030796	CG4829
FBgn0030799		FBgn0030799	CG4872
FBgn0030800		FBgn0030800	Nprl2
FBgn0024941		FBgn0024941	RSG7
FBgn0030793		FBgn0030793	CG9125
FBgn0030789		FBgn0030789	Rrp45
FBgn0030787		FBgn0030787	CG9609
FBgn0259923		FBgn0259923	2023-09-04
FBgn0030768		FBgn0030768	CG9723
FBgn0030816		FBgn0030816	CG16700
FBgn0260748		FBgn0260748	CG5004
FBgn0000163		FBgn0000163	baz
FBgn0030812		FBgn0030812	wcy
FBgn0030809		FBgn0030809	Ubr1
FBgn0027602		FBgn0027602	CG8611
FBgn0030834		FBgn0030834	CG8675
FBgn0030833		FBgn0030833	CG8915
FBgn0030847		FBgn0030847	CG12991
FBgn0026313		FBgn0026313	X11L
FBgn0030855		FBgn0030855	CG5800
FBgn0026192		FBgn0026192	par-6
FBgn0030874		FBgn0030874	Spt7
FBgn0030873		FBgn0030873	CG15814
FBgn0030869		FBgn0030869	Socs16D
FBgn0030864		FBgn0030864	CG8173
FBgn0030863		FBgn0030863	CG8188
FBgn0263258		FBgn0263258	chas
FBgn0030858		FBgn0030858	IntS2
FBgn0026375		FBgn0026375	RhoGAPp190
FBgn0030854		FBgn0030854	CG8289
FBgn0030851		FBgn0030851	CG8326
FBgn0030850		FBgn0030850	stas
FBgn0030884		FBgn0030884	CG6847
FBgn0030891		FBgn0030891	Ada3
FBgn0022724		FBgn0022724	Taf8
FBgn0030894		FBgn0030894	Mvb12
FBgn0030890		FBgn0030890	CG7536
FBgn0030877		FBgn0030877	Arp8
FBgn0052549		FBgn0052549	CG32549
FBgn0008635		FBgn0008635	betaCOP
FBgn0030943		FBgn0030943	CG6540
FBgn0001079		FBgn0001079	fu
FBgn0030946		FBgn0030946	CG6659
FBgn0030941		FBgn0030941	wgn
FBgn0030933		FBgn0030933	CG6470
FBgn0010194		FBgn0010194	Wnt5
FBgn0283473		FBgn0283473	S6KL
FBgn0030960		FBgn0030960	Atg101
FBgn0030963		FBgn0030963	CG7101
FBgn0030964		FBgn0030964	Pvf1
FBgn0030973		FBgn0030973	CG7332
FBgn0030974		FBgn0030974	CG7358
FBgn0030970		FBgn0030970	CG7326
FBgn0030959		FBgn0030959	CG6961
FBgn0030956		FBgn0030956	CG18259
FBgn0030992		FBgn0030992	CG33253
FBgn0030996		FBgn0030996	CG14194
FBgn0031003		FBgn0031003	CG7889
FBgn0040068		FBgn0040068	Vav
FBgn0259834		FBgn0259834	out
FBgn0031012		FBgn0031012	CG8051
FBgn0031011		FBgn0031011	CG8034
FBgn0052536		FBgn0052536	CG32536
FBgn0052537		FBgn0052537	CG32537
FBgn0031008		FBgn0031008	CG8010
FBgn0030995		FBgn0030995	CG7914
FBgn0031016		FBgn0031016	kek5
FBgn0031020		FBgn0031020	NAA15-16
FBgn0031023		FBgn0031023	CG14200
FBgn0000257		FBgn0000257	car
FBgn0031044		FBgn0031044	MKP-4
FBgn0031052		FBgn0031052	CG14215
FBgn0031057		FBgn0031057	Ubqn
FBgn0031059		FBgn0031059	CG14229
FBgn0043903		FBgn0043903	dome
FBgn0031053		FBgn0031053	CG14223
FBgn0031051		FBgn0031051	Ranbp21
FBgn0031048		FBgn0031048	CG12237
FBgn0087008		FBgn0087008	e(y)3
FBgn0031043		FBgn0031043	NAA20
FBgn0031030		FBgn0031030	Tao
FBgn0026430		FBgn0026430	Grip84
FBgn0020261		FBgn0020261	pcm
FBgn0044030		FBgn0044030	mRpS14
FBgn0052533		FBgn0052533	CG32533
FBgn0031078		FBgn0031078	Nup205
FBgn0052529		FBgn0052529	Hers
FBgn0261811		FBgn0261811	pico
FBgn0259789		FBgn0259789	zld
FBgn0031070		FBgn0031070	CG12702
FBgn0042132		FBgn0042132	CG18809
FBgn0040089		FBgn0040089	meso18E
FBgn0031060		FBgn0031060	CG14231
FBgn0005198		FBgn0005198	gig
FBgn0260397		FBgn0260397	Su(var)3-3
FBgn0003124		FBgn0003124	polo
FBgn0262057		FBgn0262057	Spn77Ba
FBgn0052226		FBgn0052226	Pex23
FBgn0036964		FBgn0036964	FRG1
FBgn0052227		FBgn0052227	gogo
FBgn0036942		FBgn0036942	CG7328
FBgn0261283		FBgn0261283	SREBP
FBgn0024889		FBgn0024889	Kap-alpha1
FBgn0001324		FBgn0001324	kto
FBgn0036915		FBgn0036915	Prp3
FBgn0028695		FBgn0028695	Rpn1
FBgn0036918		FBgn0036918	Pfdn6
FBgn0036919		FBgn0036919	Grasp65
FBgn0036921		FBgn0036921	RhoGDI
FBgn0004852		FBgn0004852	Ac76E
FBgn0036931		FBgn0036931	CG14183
FBgn0036922		FBgn0036922	CG14182
FBgn0036920		FBgn0036920	CG8004
FBgn0036916		FBgn0036916	Mtr3
FBgn0014037		FBgn0014037	Su(Tpl)
FBgn0262518		FBgn0262518	Rab8
FBgn0003744		FBgn0003744	trc
FBgn0023094		FBgn0023094	cyc
FBgn0036886		FBgn0036886	CG9300
FBgn0036888		FBgn0036888	CG9330
FBgn0010417		FBgn0010417	Taf6
FBgn0036891		FBgn0036891	CG9372
FBgn0036893		FBgn0036893	PIG-F
FBgn0036899		FBgn0036899	tey
FBgn0036897		FBgn0036897	CG8786
FBgn0036896		FBgn0036896	wnd
FBgn0036892		FBgn0036892	Lon
FBgn0036889		FBgn0036889	CG14100
FBgn0260857		FBgn0260857	Bet1
FBgn0023395		FBgn0023395	Chd3
FBgn0026630		FBgn0026630	nes
FBgn0036853		FBgn0036853	mRpL21
FBgn0036843		FBgn0036843	CG6812
FBgn0036846		FBgn0036846	MESR6
FBgn0036848		FBgn0036848	CG10424
FBgn0036844		FBgn0036844	Mkp3
FBgn0036838		FBgn0036838	CG3808
FBgn0036837		FBgn0036837	CG18135
FBgn0036836		FBgn0036836	CG11619
FBgn0036801		FBgn0036801	MYPT-75D
FBgn0040323		FBgn0040323	GNBP1
FBgn0036813		FBgn0036813	Atg3
FBgn0036819		FBgn0036819	Dysb
FBgn0014075		FBgn0014075	Ugt
FBgn0036828		FBgn0036828	CG6841
FBgn0027057		FBgn0027057	CSN1b
FBgn0036826		FBgn0036826	arx
FBgn0036805		FBgn0036805	Chmp1
FBgn0040322		FBgn0040322	GNBP2
FBgn0042134		FBgn0042134	Capr
FBgn0011706		FBgn0011706	rpr
FBgn0036774		FBgn0036774	mRpS26
FBgn0052195		FBgn0052195	CG32195
FBgn0003997		FBgn0003997	hid
FBgn0036775		FBgn0036775	CG5147
FBgn0036773		FBgn0036773	CG13698
FBgn0036763		FBgn0036763	TrpRS-m
FBgn0000568		FBgn0000568	Eip75B
FBgn0036769		FBgn0036769	Tsp74F
FBgn0036764		FBgn0036764	CG5535
FBgn0036761		FBgn0036761	MED19
FBgn0036760		FBgn0036760	CG5567
FBgn0036754		FBgn0036754	CG5589
FBgn0052190		FBgn0052190	NUCB1
FBgn0036732		FBgn0036732	Oatp74D
FBgn0036734		FBgn0036734	CG7564
FBgn0036741		FBgn0036741	CG7510
FBgn0036749		FBgn0036749	CG7460
FBgn0036752		FBgn0036752	Adgf-A
FBgn0052179		FBgn0052179	Krn
FBgn0036740		FBgn0036740	Vps60
FBgn0000567		FBgn0000567	Eip74EF
FBgn0025455		FBgn0025455	CycT
FBgn0036733		FBgn0036733	U4-U6-60K
FBgn0036725		FBgn0036725	CG18265
FBgn0036727		FBgn0036727	CG7589
FBgn0053051		FBgn0053051	CG33051
FBgn0266669		FBgn0266669	Sec3
FBgn0027660		FBgn0027660	blot
FBgn0036710		FBgn0036710	CG6479
FBgn0052170		FBgn0052170	CG32170
FBgn0036686		FBgn0036686	CG7728
FBgn0036688		FBgn0036688	Fit2
FBgn0036691		FBgn0036691	beg
FBgn0036695		FBgn0036695	Papst2
FBgn0036697		FBgn0036697	rogdi
FBgn0260943		FBgn0260943	Rbp6
FBgn0036696		FBgn0036696	CG14057
FBgn0028693		FBgn0028693	Rpn12
FBgn0002283		FBgn0002283	l(3)73Ah
FBgn0042178		FBgn0042178	CG32165
FBgn0042177		FBgn0042177	CG32164
FBgn0025558		FBgn0025558	CG4101
FBgn0000414		FBgn0000414	Dab
FBgn0004108		FBgn0004108	Nrt
FBgn0036662		FBgn0036662	CG9706
FBgn0036666		FBgn0036666	TSG101
FBgn0003410		FBgn0003410	sina
FBgn0287696		FBgn0287696
FBgn0004556		FBgn0004556	Dbp73D
FBgn0010223		FBgn0010223	Galphaf
FBgn0036648		FBgn0036648	CG4098
FBgn0027500		FBgn0027500	spd-2
FBgn0036643		FBgn0036643	Syx8
FBgn0283681		FBgn0283681	Tcs3
FBgn0028399		FBgn0028399	TMS1
FBgn0053158		FBgn0053158	CG33158
FBgn0262732		FBgn0262732	mbf1
FBgn0004569		FBgn0004569	aos
FBgn0036623		FBgn0036623	CG4729
FBgn0005536		FBgn0005536	Mbs
FBgn0036579		FBgn0036579	CG5027
FBgn0263608		FBgn0263608	l(3)72Dr
FBgn0266724		FBgn0266724	Trs20
FBgn0036570		FBgn0036570	IntS9
FBgn0263602		FBgn0263602	Tasp1
FBgn0260635		FBgn0260635	Diap1
FBgn0040230		FBgn0040230	dbo
FBgn0283649		FBgn0283649	elgi
FBgn0036549		FBgn0036549	CG10516
FBgn0259824		FBgn0259824	Hip14
FBgn0036557		FBgn0036557	mRpS31
FBgn0263601		FBgn0263601	mib1
FBgn0263600		FBgn0263600	DNApol-delta
FBgn0000212		FBgn0000212	brm
FBgn0263599		FBgn0263599	l(3)72Ab
FBgn0000565		FBgn0000565	Eip71CD
FBgn0087035		FBgn0087035	AGO2
FBgn0036510		FBgn0036510	SCCRO
FBgn0267390		FBgn0267390	dop
FBgn0036512		FBgn0036512	CG16979
FBgn0036514		FBgn0036514	CG12301
FBgn0036515		FBgn0036515	AIMP2
FBgn0036518		FBgn0036518	RhoGAP71E
FBgn0036522		FBgn0036522	CG7372
FBgn0036519		FBgn0036519	CG7650
FBgn0036516		FBgn0036516	CG7656
FBgn0261109		FBgn0261109	mrn
FBgn0036509		FBgn0036509	CG7739
FBgn0036502		FBgn0036502	CG7841
FBgn0026738		FBgn0026738	CG7857
FBgn0029114		FBgn0029114	Tollo
FBgn0036460		FBgn0036460	CG5114
FBgn0002778		FBgn0002778	mnd
FBgn0027088		FBgn0027088	GlyRS
FBgn0036484		FBgn0036484	Pex3
FBgn0036487		FBgn0036487	Prp31
FBgn0036489		FBgn0036489	CG7011
FBgn0036486		FBgn0036486	Msh6
FBgn0036462		FBgn0036462	mRpL39
FBgn0036450		FBgn0036450	Tdrd3
FBgn0036451		FBgn0036451	CG9425
FBgn0001120		FBgn0001120	gnu
FBgn0036449		FBgn0036449	bmm
FBgn0036428		FBgn0036428	Gbs-70E
FBgn0003459		FBgn0003459	stwl
FBgn0001085		FBgn0001085	fz
FBgn0001108		FBgn0001108	DCTN1-p150
FBgn0052137		FBgn0052137	CG32137
FBgn0036402		FBgn0036402	CG6650
FBgn0036405		FBgn0036405	CG6833
FBgn0013563		FBgn0013563	Pex1
FBgn0285896		FBgn0285896	btl
FBgn0036406		FBgn0036406	CG13484
FBgn0036386		FBgn0036386	CG8833
FBgn0026376		FBgn0026376	Rgl
FBgn0036373		FBgn0036373	Tgi
FBgn0086785		FBgn0086785	Vps36
FBgn0036366		FBgn0036366	CG10133
FBgn0023095		FBgn0023095	caps
FBgn0036365		FBgn0036365	cmb
FBgn0036356		FBgn0036356	CG10222
FBgn0036354		FBgn0036354	Poc1
FBgn0036353		FBgn0036353	CG10171
FBgn0036336		FBgn0036336	ste14
FBgn0036340		FBgn0036340	SRm160
FBgn0036341		FBgn0036341	Syx13
FBgn0010452		FBgn0010452	trn
FBgn0036337		FBgn0036337	AdenoK
FBgn0036335		FBgn0036335	mRpL20
FBgn0015904		FBgn0015904	ara
FBgn0014343		FBgn0014343	mirr
FBgn0036305		FBgn0036305	CG10984
FBgn0262714		FBgn0262714	Sap130
FBgn0036319		FBgn0036319	Ent3
FBgn0010235		FBgn0010235	Klc
FBgn0036277		FBgn0036277	CG10418
FBgn0036286		FBgn0036286	CG10616
FBgn0036291		FBgn0036291	CG10681
FBgn0264848		FBgn0264848	vih
FBgn0262524		FBgn0262524	ver
FBgn0036301		FBgn0036301	CG4069
FBgn0036299		FBgn0036299	Tsf2
FBgn0020388		FBgn0020388	Gcn5
FBgn0002466		FBgn0002466	sti
FBgn0036292		FBgn0036292	CG10646
FBgn0036289		FBgn0036289	CG10657
FBgn0036288		FBgn0036288	CG10660
FBgn0036282		FBgn0036282	Smyd4-2
FBgn0036249		FBgn0036249	CG11560
FBgn0046296		FBgn0046296	CG11534
FBgn0036257		FBgn0036257	RhoGAP68F
FBgn0013997		FBgn0013997	Nrx-IV
FBgn0052100		FBgn0052100	CG32100
FBgn0036273		FBgn0036273	INPP5E
FBgn0036271		FBgn0036271	Pbgs
FBgn0036263		FBgn0036263	thoc6
FBgn0011455		FBgn0011455	ND-SGDH
FBgn0036254		FBgn0036254	CG5645
FBgn0036205		FBgn0036205	CG14131
FBgn0036207		FBgn0036207	CG10907
FBgn0004381		FBgn0004381	Klp68D
FBgn0036214		FBgn0036214	CG7264
FBgn0036240		FBgn0036240	CG6928
FBgn0284221		FBgn0284221	Sema5c
FBgn0036237		FBgn0036237	viaf
FBgn0000404		FBgn0000404	CycA
FBgn0036211		FBgn0036211	CG5946
FBgn0015278		FBgn0015278	Pi3K68D
FBgn0036165		FBgn0036165	chrb
FBgn0036184		FBgn0036184	PCID2
FBgn0042138		FBgn0042138	CG18815
FBgn0052091		FBgn0052091	CG32091
FBgn0036188		FBgn0036188	CG7339
FBgn0015828		FBgn0015828	TfIIEalpha
FBgn0036199		FBgn0036199	Bmcp
FBgn0036198		FBgn0036198	crim
FBgn0036196		FBgn0036196	CG11658
FBgn0036194		FBgn0036194	CG11652
FBgn0052085		FBgn0052085	CG32085
FBgn0036187		FBgn0036187	RIOK1
FBgn0036142		FBgn0036142	CG7616
FBgn0036145		FBgn0036145	CG7607
FBgn0036147		FBgn0036147	Plod
FBgn0036144		FBgn0036144	GlcAT-P
FBgn0036118		FBgn0036118	Blos2
FBgn0263241		FBgn0263241	Mocs1
FBgn0036124		FBgn0036124	CG7839
FBgn0261112		FBgn0261112	APP-BP1
FBgn0036133		FBgn0036133	CG7638
FBgn0052082		FBgn0052082	IRSp53
FBgn0052076		FBgn0052076	Alg10
FBgn0036141		FBgn0036141	wls
FBgn0020412		FBgn0020412	JIL-1
FBgn0010741		FBgn0010741	Pfdn2
FBgn0036121		FBgn0036121	CG6310
FBgn0036117		FBgn0036117	CG6321
FBgn0013469		FBgn0013469	klu
FBgn0036111		FBgn0036111	Aps
FBgn0001179		FBgn0001179	hay
FBgn0036090		FBgn0036090	CG8009
FBgn0036096		FBgn0036096	CG8003
FBgn0036099		FBgn0036099	CG11811
FBgn0036107		FBgn0036107	galla-2
FBgn0027615		FBgn0027615	CG6404
FBgn0036104		FBgn0036104	CG6418
FBgn0052066		FBgn0052066	CG32066
FBgn0000629		FBgn0000629	E(z)
FBgn0036043		FBgn0036043	CG8177
FBgn0027567		FBgn0027567	CG8108
FBgn0025866		FBgn0025866	CalpB
FBgn0026404		FBgn0026404	Dronc
FBgn0036063		FBgn0036063	CG6674
FBgn0036058		FBgn0036058	CG6707
FBgn0011836		FBgn0011836	Taf2
FBgn0036053		FBgn0036053	iPLA2-VIA
FBgn0036052		FBgn0036052	CG10809
FBgn0028429		FBgn0028429	I-2
FBgn0267348		FBgn0267348	LanB2
FBgn0036018		FBgn0036018	CG3335
FBgn0036020		FBgn0036020	CG8336
FBgn0036028		FBgn0036028	CG16717
FBgn0015321		FBgn0015321	Ubc4
FBgn0036032		FBgn0036032	CG16711
FBgn0045823		FBgn0045823	vsg
FBgn0036038		FBgn0036038	defl
FBgn0036035		FBgn0036035	CG18178
FBgn0040475		FBgn0040475	SH3PX1
FBgn0036030		FBgn0036030	CG6767
FBgn0016081		FBgn0016081	fry
FBgn0036008		FBgn0036008	CG3408
FBgn0035975		FBgn0035975	PGRP-LA
FBgn0035980		FBgn0035980	mRRF1
FBgn0001226		FBgn0001226	Hsp27
FBgn0035987		FBgn0035987	CG3689
FBgn0023129		FBgn0023129	aay
FBgn0015296		FBgn0015296	Shc
FBgn0035995		FBgn0035995	CG3529
FBgn0266124		FBgn0266124	ghi
FBgn0036004		FBgn0036004	Jarid2
FBgn0036005		FBgn0036005	pall
FBgn0011327		FBgn0011327	Uch-L5
FBgn0035997		FBgn0035997	phol
FBgn0035989		FBgn0035989	CG3967
FBgn0035986		FBgn0035986	CG4022
FBgn0035983		FBgn0035983	CG4080
FBgn0001227		FBgn0001227	Hsp67Ba
FBgn0011769		FBgn0011769	Fdx1
FBgn0004379		FBgn0004379	Klp67A
FBgn0035968		FBgn0035968	Slc45-1
FBgn0035993		FBgn0035993	Nf-YA
FBgn0035936		FBgn0035936	Tsp66E
FBgn0040321		FBgn0040321	GNBP3
FBgn0035951		FBgn0035951	CG5068
FBgn0035953		FBgn0035953	CG5087
FBgn0035960		FBgn0035960	CG4942
FBgn0035965		FBgn0035965	Use1
FBgn0011206		FBgn0011206	bol
FBgn0016070		FBgn0016070	smg
FBgn0035952		FBgn0035952	CG5280
FBgn0035942		FBgn0035942	ValRS-m
FBgn0263930		FBgn0263930	dally
FBgn0052026		FBgn0052026	CG32026
FBgn0020633		FBgn0020633	Mcm7
FBgn0052022		FBgn0052022	CG32022
FBgn0011509		FBgn0011509	SrpRbeta
FBgn0035876		FBgn0035876	Pex2
FBgn0011762		FBgn0011762	DNApol-alpha50
FBgn0035877		FBgn0035877	CG7083
FBgn0035879		FBgn0035879	GAPcenA
FBgn0001253		FBgn0001253	ImpE1
FBgn0266667		FBgn0266667	Exo70
FBgn0020224		FBgn0020224	Cbl
FBgn0035901		FBgn0035901	CG6745
FBgn0035903		FBgn0035903	CG6765
FBgn0035909		FBgn0035909	ergic53
FBgn0035918		FBgn0035918	Cdc6
FBgn0017429		FBgn0017429	CG5989
FBgn0035906		FBgn0035906	GstO2
FBgn0035900		FBgn0035900	ZC3H3
FBgn0035896		FBgn0035896	CG6983
FBgn0265102		FBgn0265102	Oseg1
FBgn0035880		FBgn0035880	Culd
FBgn0035878		FBgn0035878	CG7182
FBgn0027549		FBgn0027549	CG7927
FBgn0026252		FBgn0026252	msk
FBgn0010350		FBgn0010350	CdsA
FBgn0035848		FBgn0035848	CG7979
FBgn0035850		FBgn0035850	Atg18a
FBgn0035854		FBgn0035854	CG8005
FBgn0035872		FBgn0035872	CG7185
FBgn0035866		FBgn0035866	Arl5
FBgn0027569		FBgn0027569	cert
FBgn0035852		FBgn0035852	CG7387
FBgn0035849		FBgn0035849	ERR
FBgn0020392		FBgn0020392	Nmt
FBgn0040290		FBgn0040290	RecQ4
FBgn0035844		FBgn0035844	CG13676
FBgn0029113		FBgn0029113	Uba2
FBgn0042112		FBgn0042112	mRpL36
FBgn0035833		FBgn0035833	CG7565
FBgn0026263		FBgn0026263	bip1
FBgn0035824		FBgn0035824	CG8281
FBgn0035827		FBgn0035827	Srp9
FBgn0011817		FBgn0011817	nmo
FBgn0035831		FBgn0035831	CG8038
FBgn0035829		FBgn0035829	HP4
FBgn0027554		FBgn0027554	CG8042
FBgn0028582		FBgn0028582	lqf
FBgn0035807		FBgn0035807	CG7492
FBgn0261111		FBgn0261111	BHD
FBgn0024542		FBgn0024542	Neos
FBgn0035760		FBgn0035760	CG8607
FBgn0011640		FBgn0011640	lark
FBgn0019662		FBgn0019662	qm
FBgn0035771		FBgn0035771	Sec63
FBgn0082598		FBgn0082598	akirin
FBgn0016983		FBgn0016983	smid
FBgn0014011		FBgn0014011	Rac2
FBgn0052380		FBgn0052380	SMSr
FBgn0035769		FBgn0035769	CTCF
FBgn0015298		FBgn0015298	Srp19
FBgn0035768		FBgn0035768	CG14834
FBgn0035767		FBgn0035767	CG8596
FBgn0035763		FBgn0035763	CG8602
FBgn0035761		FBgn0035761	RhoGEF4
FBgn0035754		FBgn0035754	MED4
FBgn0012058		FBgn0012058	Cdc27
FBgn0029117		FBgn0029117	Surf1
FBgn0035726		FBgn0035726	CG9953
FBgn0040837		FBgn0040837	CG8620
FBgn0002775		FBgn0002775	msl-3
FBgn0035725		FBgn0035725	Mis12
FBgn0035722		FBgn0035722	CG10075
FBgn0035711		FBgn0035711	CG8519
FBgn0035714		FBgn0035714	CG8549
FBgn0035715		FBgn0035715	CG10103
FBgn0035713		FBgn0035713	velo
FBgn0035710		FBgn0035710	SP1173
FBgn0020251		FBgn0020251	sfl
FBgn0052396		FBgn0052396	CG32396
FBgn0286051		FBgn0286051
FBgn0035708		FBgn0035708	CG8398
FBgn0035691		FBgn0035691	CG7386
FBgn0024921		FBgn0024921	Trn
FBgn0035696		FBgn0035696	Best2
FBgn0004513		FBgn0004513	Mdr65
FBgn0002526		FBgn0002526	LanA
FBgn0022935		FBgn0022935	D19A
FBgn0052406		FBgn0052406	PVRAP
FBgn0028980		FBgn0028980	tant
FBgn0035675		FBgn0035675	CG6610
FBgn0035676		FBgn0035676	ssp6
FBgn0035656		FBgn0035656	CG10479
FBgn0052412		FBgn0052412	QC
FBgn0035644		FBgn0035644	DNApol-epsilon58
FBgn0029121		FBgn0029121	Sras
FBgn0035626		FBgn0035626	lin-28
FBgn0016756		FBgn0016756	Usp47
FBgn0035640		FBgn0035640	mad2
FBgn0086694		FBgn0086694	Bre1
FBgn0040298		FBgn0040298	Myt1
FBgn0035632		FBgn0035632	Ppat-Dpck
FBgn0035624		FBgn0035624	Eaf6
FBgn0010894		FBgn0010894	sinu
FBgn0035608		FBgn0035608	blanks
FBgn0035603		FBgn0035603	Pfdn4
FBgn0004380		FBgn0004380	Klp64D
FBgn0016031		FBgn0016031	lama
FBgn0035593		FBgn0035593	CG4603
FBgn0035591		FBgn0035591	CG4611
FBgn0028962		FBgn0028962	AlaRS-m
FBgn0052423		FBgn0052423	shep
FBgn0263831		FBgn0263831	Gen
FBgn0035586		FBgn0035586	CG10671
FBgn0035590		FBgn0035590	Prpk
FBgn0035592		FBgn0035592	CG10674
FBgn0031174		FBgn0031174	CG1486
FBgn0000709		FBgn0000709	fliI
FBgn0020272		FBgn0020272	mst
FBgn0031168		FBgn0031168	CG1722
FBgn0031145		FBgn0031145	Ntf-2
FBgn0031150		FBgn0031150	bves
FBgn0031161		FBgn0031161	CG15445
FBgn0003950		FBgn0003950	unc
FBgn0052512		FBgn0052512	CG32512
FBgn0031149		FBgn0031149	Stt3A
FBgn0031143		FBgn0031143	CG1532
FBgn0031142		FBgn0031142	r-cup
FBgn0002641		FBgn0002641	mal
FBgn0026323		FBgn0026323	Tak1
FBgn0031118		FBgn0031118	RhoGAP19D
FBgn0040650		FBgn0040650	CG15456
FBgn0023177		FBgn0023177	Pp4-19C
FBgn0015789		FBgn0015789	Rab10
FBgn0031183		FBgn0031183	CG14621
FBgn0014395		FBgn0014395	tilB
FBgn0031187		FBgn0031187	Usp2
FBgn0031189		FBgn0031189	CG14618
FBgn0052499		FBgn0052499	Cda4
FBgn0031194		FBgn0031194	CG17598
FBgn0031188		FBgn0031188	CG14613
FBgn0031630		FBgn0031630	CG15629
FBgn0031632		FBgn0031632	CG15628
FBgn0031638		FBgn0031638	CG11927
FBgn0031640		FBgn0031640	Mon1
FBgn0031643		FBgn0031643	CG3008
FBgn0031649		FBgn0031649	hoe2
FBgn0041150		FBgn0041150	hoe1
FBgn0031639		FBgn0031639	mRpS2
FBgn0031637		FBgn0031637	mxt
FBgn0031635		FBgn0031635	tank
FBgn0031633		FBgn0031633	Fnta
FBgn0031631		FBgn0031631	CG3225
FBgn0031623		FBgn0031623	Taf12L
FBgn0028482		FBgn0028482	bdl
FBgn0026319		FBgn0026319	Traf4
FBgn0031604		FBgn0031604	Elp3
FBgn0031608		FBgn0031608	CG15435
FBgn0031611		FBgn0031611	FIG4
FBgn0011603		FBgn0011603	ine
FBgn0031609		FBgn0031609	CG15443
FBgn0053002		FBgn0053002	mRpL27
FBgn0031606		FBgn0031606	CG15439
FBgn0025684		FBgn0025684	MFS18
FBgn0031600		FBgn0031600	CG3652
FBgn0031598		FBgn0031598	Vps53
FBgn0000547		FBgn0000547	ed
FBgn0031590		FBgn0031590	CG3702
FBgn0001075		FBgn0001075	ft
FBgn0031589		FBgn0031589	CG3714
FBgn0051961		FBgn0051961	TBCC
FBgn0004893		FBgn0004893	bowl
FBgn0031571		FBgn0031571	bark
FBgn0021800		FBgn0021800	Reph
FBgn0031574		FBgn0031574	CG3964
FBgn0031579		FBgn0031579	CG15422
FBgn0000256		FBgn0000256	capu
FBgn0031573		FBgn0031573	CG3407
FBgn0031534		FBgn0031534	Snx1
FBgn0266670		FBgn0266670	Sec5
FBgn0031544		FBgn0031544	CG17593
FBgn0024244		FBgn0024244	drm
FBgn0015663		FBgn0015663	Dot
FBgn0015376		FBgn0015376	cutlet
FBgn0002985		FBgn0002985	odd
FBgn0284253		FBgn0284253	LeuRS
FBgn0031540		FBgn0031540	CG3238
FBgn0005616		FBgn0005616	msl-2
FBgn0031536		FBgn0031536	Cog3
FBgn0260817		FBgn0260817	gkt
FBgn0016698		FBgn0016698	Ptpa
FBgn0031516		FBgn0031516	CG9663
FBgn0011648		FBgn0011648	Mad
FBgn0031468		FBgn0031468	CG2975
FBgn0031474		FBgn0031474	CG2991
FBgn0031478		FBgn0031478	CG8814
FBgn0051950		FBgn0051950	CG31950
FBgn0028970		FBgn0028970	betaggt-II
FBgn0041111		FBgn0041111	lilli
FBgn0260639		FBgn0260639	gammaTub23C
FBgn0031484		FBgn0031484	CG3165
FBgn0025681		FBgn0025681	CG3558
FBgn0031490		FBgn0031490	CG17264
FBgn0031492		FBgn0031492	CG3542
FBgn0031495		FBgn0031495	GABPI
FBgn0031498		FBgn0031498	CG17260
FBgn0031500		FBgn0031500	CG17221
FBgn0015600		FBgn0015600	toc
FBgn0031493		FBgn0031493	Sf3b2
FBgn0031491		FBgn0031491	alpha4GT1
FBgn0031489		FBgn0031489	CG17224
FBgn0002989		FBgn0002989	okr
FBgn0250786		FBgn0250786	Chd1
FBgn0031485		FBgn0031485	CG9643
FBgn0031483		FBgn0031483	CG9641
FBgn0004584		FBgn0004584	Rrp1
FBgn0024920		FBgn0024920	Ts
FBgn0031479		FBgn0031479	Prx6005
FBgn0031435		FBgn0031435	Elba2
FBgn0031437		FBgn0031437	Arpc5
FBgn0031449		FBgn0031449	CG31689
FBgn0031452		FBgn0031452	Cwc25
FBgn0031456		FBgn0031456	Trn-SR
FBgn0028398		FBgn0028398	Taf10
FBgn0031459		FBgn0031459	CG2862
FBgn0031461		FBgn0031461	daw
FBgn0026324		FBgn0026324	Taf10b
FBgn0031457		FBgn0031457	CG3077
FBgn0031451		FBgn0031451	CG9961
FBgn0026479		FBgn0026479	Drp1
FBgn0031434		FBgn0031434	insv
FBgn0264979		FBgn0264979	CG4267
FBgn0261647		FBgn0261647	Axud1
FBgn0264672		FBgn0264672	Eogt
FBgn0031422		FBgn0031422	PIG-Wa
FBgn0000490		FBgn0000490	dpp
FBgn0011818		FBgn0011818	oaf
FBgn0014010		FBgn0014010	Rab5
FBgn0262126		FBgn0262126	Sec24CD
FBgn0031378		FBgn0031378	CG15362
FBgn0031379		FBgn0031379	CG7289
FBgn0003557		FBgn0003557	Su(dx)
FBgn0027509		FBgn0027509	TBCD
FBgn0031399		FBgn0031399	mio
FBgn0031401		FBgn0031401	papi
FBgn0031398		FBgn0031398	CG10880
FBgn0031395		FBgn0031395	CG10874
FBgn0031390		FBgn0031390	tho2
FBgn0031377		FBgn0031377	CG15356
FBgn0031351		FBgn0031351	CG14352
FBgn0011570		FBgn0011570	cpb
FBgn0031357		FBgn0031357	mRpL48
FBgn0260648		FBgn0260648	Rrp40
FBgn0031360		FBgn0031360	CG31937
FBgn0264494		FBgn0264494	CG17646
FBgn0027597		FBgn0027597	CG17712
FBgn0031361		FBgn0031361	CG17652
FBgn0086698		FBgn0086698	frtz
FBgn0031356		FBgn0031356	CG17660
FBgn0051935		FBgn0051935	CG31935
FBgn0031327		FBgn0031327	CG5397
FBgn0031344		FBgn0031344	CG7420
FBgn0002543		FBgn0002543	robo2
FBgn0015905		FBgn0015905	ast
FBgn0031298		FBgn0031298	Atg4a
FBgn0031304		FBgn0031304	CG4552
FBgn0283525		FBgn0283525	l(2)10685
FBgn0031312		FBgn0031312	Tango14
FBgn0031314		FBgn0031314	IntS14
FBgn0031318		FBgn0031318	CG4887
FBgn0031321		FBgn0031321	Tgt
FBgn0031320		FBgn0031320	CG5126
FBgn0031317		FBgn0031317	Charon
FBgn0031309		FBgn0031309	Tfb4
FBgn0016926		FBgn0016926	Pino
FBgn0261938		FBgn0261938	mtRNApol
FBgn0003310		FBgn0003310
FBgn0051658		FBgn0051658	Nnf1b
FBgn0031282		FBgn0031282	Pex12
FBgn0015621		FBgn0015621	Clp
FBgn0020545		FBgn0020545	kraken
FBgn0029095		FBgn0029095	aru
FBgn0031284		FBgn0031284	PGAP2
FBgn0284247		FBgn0284247	ds
FBgn0004611		FBgn0004611	Plc21C
FBgn0263933		FBgn0263933	ebi
FBgn0031254		FBgn0031254	CG13692
FBgn0003963		FBgn0003963	ush
FBgn0031265		FBgn0031265	CG2794
FBgn0031266		FBgn0031266	Sf3b1
FBgn0031267		FBgn0031267	Ipk2
FBgn0021874		FBgn0021874	Nle
FBgn0260933		FBgn0260933	rempA
FBgn0005660		FBgn0005660	Ets21C
FBgn0043364		FBgn0043364	cbt
FBgn0015924		FBgn0015924	crq
FBgn0031252		FBgn0031252	CG13690
FBgn0031250		FBgn0031250	Ent1
FBgn0031217		FBgn0031217	CG11377
FBgn0031228		FBgn0031228	ND-15
FBgn0031233		FBgn0031233	Tbc1d15-17
FBgn0031244		FBgn0031244	CG11601
FBgn0086912		FBgn0086912	mbm
FBgn0031238		FBgn0031238	CG3645
FBgn0283652		FBgn0283652	Rpp30
FBgn0036974		FBgn0036974	eRF1
FBgn0036975		FBgn0036975	CG5618
FBgn0024887		FBgn0024887	kin17
FBgn0011205		FBgn0011205	fbl
FBgn0036999		FBgn0036999	isoQC
FBgn0052425		FBgn0052425	CG32425
FBgn0037011		FBgn0037011	CG4858
FBgn0037007		FBgn0037007	CG5059
FBgn0037000		FBgn0037000	ZnT77C
FBgn0036994		FBgn0036994	CG5199
FBgn0036990		FBgn0036990	mRpL15
FBgn0028978		FBgn0028978	trbl
FBgn0259676		FBgn0259676	DNApol-alpha60
FBgn0036973		FBgn0036973	Rbbp5
FBgn0016696		FBgn0016696	Pitslre
FBgn0037020		FBgn0037020	Pex14
FBgn0037027		FBgn0037027	HIPP1
FBgn0040636		FBgn0040636	CG13255
FBgn0011591		FBgn0011591	fng
FBgn0052432		FBgn0052432	CG32432
FBgn0027055		FBgn0027055	CSN3
FBgn0037028		FBgn0037028	CG3618
FBgn0037026		FBgn0037026	CG3634
FBgn0037022		FBgn0037022	CG11396
FBgn0037021		FBgn0037021	CG11399
FBgn0037019		FBgn0037019	Pex16
FBgn0037018		FBgn0037018	CG4042
FBgn0037044		FBgn0037044	CG10585
FBgn0028402		FBgn0028402	Sin
FBgn0026179		FBgn0026179	siz
FBgn0037050		FBgn0037050	ICA69
FBgn0028427		FBgn0028427	Ilk
FBgn0004865		FBgn0004865	Eip78C
FBgn0037061		FBgn0037061	CG12975
FBgn0053056		FBgn0053056	CG33056
FBgn0041100		FBgn0041100	park
FBgn0020294		FBgn0020294	ko
FBgn0037045		FBgn0037045	CG10584
FBgn0037071		FBgn0037071	CG7632
FBgn0037073		FBgn0037073	Tsr1
FBgn0005694		FBgn0005694	Aef1
FBgn0267849		FBgn0267849	Syx7
FBgn0037087		FBgn0037087	CG7519
FBgn0037093		FBgn0037093	Cdk12
FBgn0037094		FBgn0037094	CG7611
FBgn0028663		FBgn0028663	VhaM9.7-b
FBgn0037102		FBgn0037102	CRIF
FBgn0029152		FBgn0029152	Mkrn1
FBgn0264561		FBgn0264561	Glg1
FBgn0037076		FBgn0037076	ebd2
FBgn0037074		FBgn0037074	CG7324
FBgn0003042		FBgn0003042	Pc
FBgn0027945		FBgn0027945	ppl
FBgn0037108		FBgn0037108	CG11306
FBgn0037110		FBgn0037110	ORMDL
FBgn0037121		FBgn0037121	Rpb8
FBgn0000560		FBgn0000560	eg
FBgn0022936		FBgn0022936	CycH
FBgn0037134		FBgn0037134	CG7407
FBgn0037126		FBgn0037126	CG14567
FBgn0037109		FBgn0037109	MED1
FBgn0262737		FBgn0262737	mub
FBgn0037142		FBgn0037142	CG14562
FBgn0037144		FBgn0037144	CG7458
FBgn0037149		FBgn0037149	CG14561
FBgn0037141		FBgn0037141	DNApol-eta
FBgn0015075		FBgn0015075	Ddx1
FBgn0004179		FBgn0004179	Csp
FBgn0011771		FBgn0011771	Hem
FBgn0037200		FBgn0037200	CG11109
FBgn0037202		FBgn0037202	Ssl1
FBgn0037206		FBgn0037206	CG12768
FBgn0037207		FBgn0037207	Mes2
FBgn0044324		FBgn0044324	Chro
FBgn0010348		FBgn0010348	Arf79F
FBgn0037199		FBgn0037199	CG11137
FBgn0027339		FBgn0027339	jim
FBgn0037375		FBgn0037375	kat-60L1
FBgn0037377		FBgn0037377	CG1218
FBgn0037379		FBgn0037379	CG10979
FBgn0037384		FBgn0037384	dgrn
FBgn0028436		FBgn0028436	ECSIT
FBgn0029088		FBgn0029088	disp
FBgn0037382		FBgn0037382	Hpr1
FBgn0037378		FBgn0037378	CG2046
FBgn0266672		FBgn0266672	Sec8
FBgn0037372		FBgn0037372	CG2091
FBgn0011715		FBgn0011715	Snr1
FBgn0037332		FBgn0037332	Hcs
FBgn0051550		FBgn0051550	CG31550
FBgn0010051		FBgn0010051	Itp-r83A
FBgn0037345		FBgn0037345	rev7
FBgn0019637		FBgn0019637	Atu
FBgn0037356		FBgn0037356	CG12170
FBgn0262125		FBgn0262125	Sec23
FBgn0037359		FBgn0037359	MED27
FBgn0046222		FBgn0046222	CG1109
FBgn0037363		FBgn0037363	Atg17
FBgn0037370		FBgn0037370	CG1236
FBgn0027497		FBgn0027497	Madm
FBgn0037371		FBgn0037371	Sym
FBgn0037369		FBgn0037369	CG2100
FBgn0004878		FBgn0004878	cas
FBgn0010772		FBgn0010772	Xe7
FBgn0037360		FBgn0037360	CG2182
FBgn0037358		FBgn0037358	elm
FBgn0027951		FBgn0027951	MTA1-like
FBgn0044823		FBgn0044823	Spec2
FBgn0017550		FBgn0017550	Rga
FBgn0014366		FBgn0014366	noi
FBgn0037344		FBgn0037344	CG2926
FBgn0037339		FBgn0037339	Pi4KIIalpha
FBgn0037336		FBgn0037336	CG2519
FBgn0015402		FBgn0015402	ksr
FBgn0037330		FBgn0037330	mRpL44
FBgn0037327		FBgn0037327	PEK
FBgn0037299		FBgn0037299	Vps37B
FBgn0037301		FBgn0037301	Mms19
FBgn0264712		FBgn0264712	CG1172
FBgn0086695		FBgn0086695	hd
FBgn0037315		FBgn0037315	Cerk
FBgn0051538		FBgn0051538	CG31538
FBgn0037305		FBgn0037305	CG12173
FBgn0260462		FBgn0260462	CG12163
FBgn0053293		FBgn0053293	CG33293
FBgn0040208		FBgn0040208	Kat60
FBgn0037290		FBgn0037290	CG1124
FBgn0037293		FBgn0037293	CG12007
FBgn0037262		FBgn0037262	MED31
FBgn0087013		FBgn0087013	Karybeta3
FBgn0037265		FBgn0037265	spartin
FBgn0037279		FBgn0037279	CG1129
FBgn0037282		FBgn0037282	CG14657
FBgn0027930		FBgn0027930	MP1
FBgn0037235		FBgn0037235	CG1103
FBgn0037240		FBgn0037240	Cont
FBgn0037255		FBgn0037255	Fip1
FBgn0051523		FBgn0051523	CG31523
FBgn0051522		FBgn0051522	CG31522
FBgn0037251		FBgn0037251	CG9804
FBgn0037242		FBgn0037242	CG9855
FBgn0037231		FBgn0037231	Vps24
FBgn0037218		FBgn0037218	aux
FBgn0015331		FBgn0015331	abs
FBgn0010225		FBgn0010225	Gel
FBgn0037225		FBgn0037225	TwdlG
FBgn0037220		FBgn0037220	CG14641
FBgn0261436		FBgn0261436	DhpD
FBgn0015000		FBgn0015000	betaggt-I
FBgn0031657		FBgn0031657	CG3756
FBgn0031659		FBgn0031659	CG14043
FBgn0031660		FBgn0031660	mRpL28
FBgn0031670		FBgn0031670	CG3887
FBgn0031676		FBgn0031676	senju
FBgn0028572		FBgn0028572	qtc
FBgn0031682		FBgn0031682	CG5828
FBgn0031683		FBgn0031683	CG4230
FBgn0031681		FBgn0031681	pgant5
FBgn0031673		FBgn0031673	CG31650
FBgn0031664		FBgn0031664	CG8892
FBgn0031661		FBgn0031661	Gmd
FBgn0031652		FBgn0031652	jet
FBgn0031688		FBgn0031688	Cyp28d2
FBgn0031689		FBgn0031689	Cyp28d1
FBgn0031696		FBgn0031696	Bub1
FBgn0016076		FBgn0016076	vri
FBgn0031701		FBgn0031701	TotM
FBgn0031703		FBgn0031703	CG12512
FBgn0031697		FBgn0031697	CG14024
FBgn0003716		FBgn0003716	tkv
FBgn0031711		FBgn0031711	CG6907
FBgn0051648		FBgn0051648	CG31648
FBgn0031717		FBgn0031717	Oscillin
FBgn0004620		FBgn0004620	GluRIIA
FBgn0031713		FBgn0031713	CG7277
FBgn0031710		FBgn0031710	Vps52
FBgn0031708		FBgn0031708	CG7382
FBgn0024191		FBgn0024191	sip1
FBgn0031736		FBgn0031736	CG11030
FBgn0031740		FBgn0031740	CG7239
FBgn0031745		FBgn0031745	rau
FBgn0031739		FBgn0031739	CG14005
FBgn0001941		FBgn0001941	ifc
FBgn0031769		FBgn0031769	CG9135
FBgn0031770		FBgn0031770	CG13995
FBgn0031774		FBgn0031774	CG9147
FBgn0031776		FBgn0031776	Pfdn1
FBgn0266449		FBgn0266449	Kr-h2
FBgn0266521		FBgn0266521	stai
FBgn0051642		FBgn0051642	CG31642
FBgn0031779		FBgn0031779	CG9175
FBgn0031777		FBgn0031777	CG9154
FBgn0031773		FBgn0031773	Fbw5
FBgn0000052		FBgn0000052	ade2
FBgn0031766		FBgn0031766	CG9117
FBgn0025742		FBgn0025742	mtm
FBgn0031759		FBgn0031759	lid
FBgn0000308		FBgn0000308	chic
FBgn0031756		FBgn0031756	CG13992
FBgn0086265		FBgn0086265	psd
FBgn0263278		FBgn0263278	Fic
FBgn0027496		FBgn0027496	epsilonCOP
FBgn0051638		FBgn0051638	CG31638
FBgn0031822		FBgn0031822	Phf5a
FBgn0031818		FBgn0031818	CG9536
FBgn0031817		FBgn0031817	CG9531
FBgn0031814		FBgn0031814	retm
FBgn0011722		FBgn0011722	Tig
FBgn0031799		FBgn0031799	Pez
FBgn0051637		FBgn0051637	CG31637
FBgn0031836		FBgn0031836	CG11050
FBgn0286898		FBgn0286898
FBgn0028467		FBgn0028467	CG11070
FBgn0031851		FBgn0031851	Aatf
FBgn0046704		FBgn0046704	Liprin-alpha
FBgn0025777		FBgn0025777	homer
FBgn0031848		FBgn0031848	Nse1
FBgn0000351		FBgn0000351	cort
FBgn0263200		FBgn0263200	Galt
FBgn0000320		FBgn0000320	eya
FBgn0017551		FBgn0017551	Rca1
FBgn0031868		FBgn0031868	Rat1
FBgn0020616		FBgn0020616	SA
FBgn0031877		FBgn0031877	CG10399
FBgn0031878		FBgn0031878	sip2
FBgn0031873		FBgn0031873	Gas41
FBgn0031872		FBgn0031872	ihog
FBgn0031871		FBgn0031871	Fgop2
FBgn0011737		FBgn0011737	Wee1
FBgn0042092		FBgn0042092	CG13773
FBgn0031881		FBgn0031881	MME1
FBgn0031885		FBgn0031885	Mnn1
FBgn0266666		FBgn0266666	Sem1
FBgn0263133		FBgn0263133	mEFG1
FBgn0031896		FBgn0031896	CG4502
FBgn0031895		FBgn0031895	CG4497
FBgn0031886		FBgn0031886	Nuf2
FBgn0000053		FBgn0000053	ade3
FBgn0284084		FBgn0284084	wg
FBgn0028387		FBgn0028387	chm
FBgn0031918		FBgn0031918	CG6055
FBgn0025697		FBgn0025697	santa-maria
FBgn0031947		FBgn0031947	CG7154
FBgn0031951		FBgn0031951	r2d2
FBgn0261800		FBgn0261800	LanB1
FBgn0031952		FBgn0031952	cdc14
FBgn0031950		FBgn0031950	Herp
FBgn0286198		FBgn0286198
FBgn0031948		FBgn0031948	CG7149
FBgn0041182		FBgn0041182	Tep2
FBgn0027515		FBgn0027515	CG7115
FBgn0004177		FBgn0004177	mts
FBgn0031975		FBgn0031975	Tg
FBgn0031977		FBgn0031977	baf
FBgn0031979		FBgn0031979	CCDC53
FBgn0010287		FBgn0010287	Trf
FBgn0267488		FBgn0267488	Mcr
FBgn0013531		FBgn0013531	MED20
FBgn0031972		FBgn0031972	Wwox
FBgn0031961		FBgn0031961	CG7102
FBgn0031988		FBgn0031988	CG8668
FBgn0261064		FBgn0261064	Rbsn-5
FBgn0031996		FBgn0031996	CG8460
FBgn0015299		FBgn0015299	Ssb-c31a
FBgn0032002		FBgn0032002	CG8353
FBgn0032013		FBgn0032013	Scgalpha
FBgn0032014		FBgn0032014	CG7840
FBgn0032016		FBgn0032016	Mettl14
FBgn0032020		FBgn0032020	CG7787
FBgn0032025		FBgn0032025	CG7778
FBgn0032026		FBgn0032026	CG7627
FBgn0032021		FBgn0032021	CG7781
FBgn0032015		FBgn0032015	Ostgamma
FBgn0261020		FBgn0261020	wol
FBgn0003502		FBgn0003502	Btk29A
FBgn0032005		FBgn0032005	Snx6
FBgn0032004		FBgn0032004	CG8292
FBgn0032000		FBgn0032000	CG8372
FBgn0031998		FBgn0031998	SLC5A11
FBgn0031995		FBgn0031995	CG8475
FBgn0031992		FBgn0031992	CG8498
FBgn0031990		FBgn0031990	PAPLA1
FBgn0031987		FBgn0031987	CG12375
FBgn0032029		FBgn0032029	CG17292
FBgn0032030		FBgn0032030	Wdr82
FBgn0032032		FBgn0032032	CG17294
FBgn0032034		FBgn0032034	Rcd4
FBgn0032036		FBgn0032036	CG13384
FBgn0020497		FBgn0020497	emb
FBgn0032054		FBgn0032054	Uba4
FBgn0016122		FBgn0016122	Acer
FBgn0028394		FBgn0028394	CG17834
FBgn0032051		FBgn0032051	CG13097
FBgn0026718		FBgn0026718	fu12
FBgn0032033		FBgn0032033	CG13392
FBgn0032031		FBgn0032031	CG13390
FBgn0001114		FBgn0001114	Glt
FBgn0260861		FBgn0260861	Trs23
FBgn0003209		FBgn0003209	raw
FBgn0004914		FBgn0004914	Hnf4
FBgn0040964		FBgn0040964	CG18661
FBgn0052982		FBgn0052982	CG32982
FBgn0032101		FBgn0032101	CG9586
FBgn0013746		FBgn0013746	alien
FBgn0011705		FBgn0011705	rost
FBgn0032078		FBgn0032078	C1GalTA
FBgn0267252		FBgn0267252	Ggamma30A
FBgn0010314		FBgn0010314	Cks30A
FBgn0032117		FBgn0032117	FucTB
FBgn0032105		FBgn0032105	borr
FBgn0002973		FBgn0002973	numb
FBgn0032123		FBgn0032123	Oatp30B
FBgn0032130		FBgn0032130	CG3838
FBgn0011207		FBgn0011207	pelo
FBgn0032138		FBgn0032138	CG4364
FBgn0032139		FBgn0032139	CG13116
FBgn0270924		FBgn0270924	zf30C
FBgn0032147		FBgn0032147	IP3K1
FBgn0032149		FBgn0032149	CG4036
FBgn0010520		FBgn0010520	Bka
FBgn0032160		FBgn0032160	CG4598
FBgn0032161		FBgn0032161	CG4594
FBgn0032170		FBgn0032170	CG4658
FBgn0015664		FBgn0015664	Dref
FBgn0032171		FBgn0032171	CG5846
FBgn0032168		FBgn0032168	CG13126
FBgn0032167		FBgn0032167	CG5853
FBgn0287788		FBgn0287788
FBgn0051712		FBgn0051712	CG31712
FBgn0032156		FBgn0032156	CG13124
FBgn0032154		FBgn0032154	mtDNA-helicase
FBgn0028704		FBgn0028704	Nckx30C
FBgn0000180		FBgn0000180	bib
FBgn0043456		FBgn0043456	CG4747
FBgn0032178		FBgn0032178	Spn31A
FBgn0032187		FBgn0032187	CG4839
FBgn0032194		FBgn0032194	CG4901
FBgn0250843		FBgn0250843	Prosalpha6
FBgn0032195		FBgn0032195	CG4908
FBgn0032198		FBgn0032198	eEF1delta
FBgn0032193		FBgn0032193	CG5727
FBgn0032191		FBgn0032191	CG5734
FBgn0032189		FBgn0032189	Ripalpha
FBgn0051717		FBgn0051717	CG31717
FBgn0259482		FBgn0259482	Mob3
FBgn0032204		FBgn0032204	CG4953
FBgn0260750		FBgn0260750	Mulk
FBgn0032214		FBgn0032214	CG4968
FBgn0032222		FBgn0032222	CG5037
FBgn0032224		FBgn0032224	Sps2
FBgn0032225		FBgn0032225	CG5022
FBgn0032230		FBgn0032230	lft
FBgn0032231		FBgn0032231	CG5056
FBgn0267821		FBgn0267821	da
FBgn0032246		FBgn0032246	CG5168
FBgn0267330		FBgn0267330	KdelR
FBgn0004915		FBgn0004915	TfIIB
FBgn0032250		FBgn0032250	holn1
FBgn0027611		FBgn0027611	LManII
FBgn0032253		FBgn0032253	LManI
FBgn0032248		FBgn0032248	Bug22
FBgn0032242		FBgn0032242	CG5355
FBgn0027568		FBgn0027568	Cand1
FBgn0011703		FBgn0011703	RnrL
FBgn0032216		FBgn0032216	Usp14
FBgn0032213		FBgn0032213	CG5390
FBgn0032261		FBgn0032261	CG6094
FBgn0010398		FBgn0010398	Lrr47
FBgn0032264		FBgn0032264	Lip4
FBgn0051721		FBgn0051721	Trim9
FBgn0051871		FBgn0051871	CG31871
FBgn0040496		FBgn0040496	CG17104
FBgn0032290		FBgn0032290	CG6443
FBgn0032293		FBgn0032293	Dpy-30L1
FBgn0027550		FBgn0027550	CG6495
FBgn0015320		FBgn0015320	Ubc2
FBgn0032297		FBgn0032297	CG17124
FBgn0032296		FBgn0032296	CG6729
FBgn0027868		FBgn0027868	Nup107
FBgn0032262		FBgn0032262	CG7384
FBgn0027363		FBgn0027363	Stam
FBgn0041781		FBgn0041781	SCAR
FBgn0032330		FBgn0032330	Samuel
FBgn0000146		FBgn0000146	aub
FBgn0024227		FBgn0024227	aurB
FBgn0027453		FBgn0027453	Dnz1
FBgn0051869		FBgn0051869	CG31869
FBgn0032298		FBgn0032298	CG6724
FBgn0261983		FBgn0261983	l(2)gd1
FBgn0032348		FBgn0032348	CG4751
FBgn0032354		FBgn0032354	CG4788
FBgn0032358		FBgn0032358	Ppt2
FBgn0020270		FBgn0020270	mre11
FBgn0028700		FBgn0028700	RfC38
FBgn0032346		FBgn0032346	Csl4
FBgn0027582		FBgn0027582	CG6230
FBgn0032343		FBgn0032343	CG6201
FBgn0032341		FBgn0032341	Reps
FBgn0283682		FBgn0283682	Ge-1
FBgn0032363		FBgn0032363	Dlg5
FBgn0287204		FBgn0287204
FBgn0032378		FBgn0032378	CycY
FBgn0032390		FBgn0032390	dgt2
FBgn0051864		FBgn0051864	Qtzl
FBgn0051865		FBgn0051865	Ada1-1
FBgn0032402		FBgn0032402	CG14945
FBgn0032399		FBgn0032399	CG6785
FBgn0032398		FBgn0032398	CG6766
FBgn0261266		FBgn0261266	zuc
FBgn0000588		FBgn0000588	esc
FBgn0032407		FBgn0032407	Pex19
FBgn0032409		FBgn0032409	Ced-12
FBgn0032420		FBgn0032420	CG6583
FBgn0032408		FBgn0032408	CG6712
FBgn0032428		FBgn0032428	CG6405
FBgn0020443		FBgn0020443	eRF3
FBgn0043841		FBgn0043841	vir-1
FBgn0032447		FBgn0032447	PICK1
FBgn0032451		FBgn0032451	spict
FBgn0032453		FBgn0032453	CG6180
FBgn0032450		FBgn0032450	CG5776
FBgn0021796		FBgn0021796	Tor
FBgn0028965		FBgn0028965	A16
FBgn0032467		FBgn0032467	CG9934
FBgn0032465		FBgn0032465	CG12404
FBgn0024291		FBgn0024291	Sirt1
FBgn0032476		FBgn0032476	CG5439
FBgn0032477		FBgn0032477	CG5287
FBgn0032480		FBgn0032480	Edem2
FBgn0032482		FBgn0032482	Pect
FBgn0032486		FBgn0032486	mRF1
FBgn0032488		FBgn0032488	CG16812
FBgn0051729		FBgn0051729	CG31729
FBgn0051852		FBgn0051852	Tap42
FBgn0051855		FBgn0051855	CG31855
FBgn0032513		FBgn0032513	CG6565
FBgn0025724		FBgn0025724	beta'COP
FBgn0032514		FBgn0032514	CG9302
FBgn0032512		FBgn0032512	CG9305
FBgn0022069		FBgn0022069	Nnp-1
FBgn0028406		FBgn0028406	Drep4
FBgn0032487		FBgn0032487	Ski6
FBgn0032485		FBgn0032485	CG9426
FBgn0032475		FBgn0032475	Sfmbt
FBgn0032474		FBgn0032474	DnaJ-H
[truncated: 1,702 more rows]

## Sheet: Codon Opt 50-60
FBgn0031090		FBgn0031090	Rab35
FBgn0053517		FBgn0053517	Dop2R
FBgn0023537		FBgn0023537	CG17896
FBgn0010019		FBgn0010019	Cyp4g1
FBgn0040383		FBgn0040383	CG5254
FBgn0040382		FBgn0040382	CG5273
FBgn0024364		FBgn0024364	CG11417
FBgn0023169		FBgn0023169	AMPKalpha
FBgn0024986		FBgn0024986	CG3719
FBgn0000826		FBgn0000826	png
FBgn0024365		FBgn0024365	CG12773
FBgn0013720		FBgn0013720	pck
FBgn0025381		FBgn0025381	rush
FBgn0023530		FBgn0023530	CG3740
FBgn0025382		FBgn0025382	Rab27
FBgn0023519		FBgn0023519	mRpL16
FBgn0000667		FBgn0000667	Actn
FBgn0028969		FBgn0028969	deltaCOP
FBgn0026090		FBgn0026090	CG14812
FBgn0040395		FBgn0040395	Unc-76
FBgn0023507		FBgn0023507	D2hgdh
FBgn0004654		FBgn0004654	Pgd
FBgn0040899		FBgn0040899	CG17776
FBgn0023549		FBgn0023549	Mct1
FBgn0023529		FBgn0023529	CG2918
FBgn0004397		FBgn0004397	Vinc
FBgn0001404		FBgn0001404	egh
FBgn0040334		FBgn0040334	Tsp3A
FBgn0003714		FBgn0003714	tko
FBgn0024994		FBgn0024994	Csat
FBgn0052793		FBgn0052793	CG32793
FBgn0029648		FBgn0029648	CG3603
FBgn0029676		FBgn0029676	HIP-R
FBgn0260484		FBgn0260484	HIP
FBgn0285910		FBgn0285910
FBgn0026079		FBgn0026079	Nsun2
FBgn0004832		FBgn0004832	Xpac
FBgn0029715		FBgn0029715	CG11444
FBgn0003449		FBgn0003449	snf
FBgn0004687		FBgn0004687	Mlc-c
FBgn0000394		FBgn0000394	cv
FBgn0029823		FBgn0029823	CG3011
FBgn0015794		FBgn0015794	Rab18
FBgn0029833		FBgn0029833	MCTS1
FBgn0029849		FBgn0029849	Efr
FBgn0003514		FBgn0003514	sqh
FBgn0029838		FBgn0029838	CG4666
FBgn0029867		FBgn0029867	CG3847
FBgn0261955		FBgn0261955	kdn
FBgn0014031		FBgn0014031	Spat
FBgn0003139		FBgn0003139	PpV
FBgn0026015		FBgn0026015	Top3beta
FBgn0286222		FBgn0286222
FBgn0029890		FBgn0029890	CG4095
FBgn0029888		FBgn0029888	ND-ASHI
FBgn0029929		FBgn0029929	CG4593
FBgn0000330		FBgn0000330	cm
FBgn0016041		FBgn0016041	Tom40
FBgn0029975		FBgn0029975	spidey
FBgn0003447		FBgn0003447	sn
FBgn0029994		FBgn0029994	CG2254
FBgn0004656		FBgn0004656	fs(1)h
FBgn0029979		FBgn0029979	mahe
FBgn0029969		FBgn0029969	CG10932
FBgn0020653		FBgn0020653	Trxr-1
FBgn0017566		FBgn0017566	ND-75
FBgn0030000		FBgn0030000	CG2260
FBgn0264975		FBgn0264975	Nrg
FBgn0030056		FBgn0030056	CG11284
FBgn0030061		FBgn0030061	CG1785
FBgn0030060		FBgn0030060	CG2004
FBgn0030082		FBgn0030082	HP1b
FBgn0052708		FBgn0052708	CG32708
FBgn0030086		FBgn0030086	CCT2
FBgn0030099		FBgn0030099	CG12056
FBgn0040235		FBgn0040235	c12.1
FBgn0004856		FBgn0004856	Bx42
FBgn0026149		FBgn0026149	BCL7-like
FBgn0030136		FBgn0030136	RpS28b
FBgn0027084		FBgn0027084	LysRS
FBgn0028327		FBgn0028327	l(1)G0320
FBgn0267253		FBgn0267253	CG32700
FBgn0030177		FBgn0030177	CG2972
FBgn0030196		FBgn0030196	Psf3
FBgn0011770		FBgn0011770	Gip
FBgn0003204		FBgn0003204	ras
FBgn0034564		FBgn0034564	CG9344
FBgn0261394		FBgn0261394	Prosalpha3
FBgn0034576		FBgn0034576	ND-B14.7
FBgn0002736		FBgn0002736	mago
FBgn0034647		FBgn0034647	pirk
FBgn0034646		FBgn0034646	Rae1
FBgn0029084		FBgn0029084	gom
FBgn0034709		FBgn0034709	Swim
FBgn0013272		FBgn0013272	Gp150
FBgn0022985		FBgn0022985	qkr58E-2
FBgn0034718		FBgn0034718	wdp
FBgn0034816		FBgn0034816	CG3085
FBgn0050185		FBgn0050185	AIMP3
FBgn0034902		FBgn0034902	CG5532
FBgn0034879		FBgn0034879	Rrp4
FBgn0015372		FBgn0015372	RabX1
FBgn0034914		FBgn0034914	CG5554
FBgn0024234		FBgn0024234	gbb
FBgn0034919		FBgn0034919	CG5569
FBgn0034936		FBgn0034936	CG2970
FBgn0020764		FBgn0020764	Alas
FBgn0283494		FBgn0283494	Adk2
FBgn0023170		FBgn0023170	RpL39
FBgn0283509		FBgn0283509	Phm
FBgn0015268		FBgn0015268	Nap1
FBgn0025352		FBgn0025352	Thiolase
FBgn0034918		FBgn0034918	Pym
FBgn0021895		FBgn0021895	ytr
FBgn0034915		FBgn0034915	eIF6
FBgn0010278		FBgn0010278	Ssrp
FBgn0287831		FBgn0287831
FBgn0034988		FBgn0034988	cN-IIIB
FBgn0003888		FBgn0003888	betaTub60D
FBgn0034986		FBgn0034986	mRpS17
FBgn0002787		FBgn0002787	Rpn8
FBgn0035020		FBgn0035020	CG13585
FBgn0035046		FBgn0035046	ND-19
FBgn0016687		FBgn0016687	Nurf-38
FBgn0035016		FBgn0035016	CG4612
FBgn0035063		FBgn0035063	CG3594
FBgn0035089		FBgn0035089	Phk-3
FBgn0040666		FBgn0040666	CG12848
FBgn0035147		FBgn0035147	Gale
FBgn0035148		FBgn0035148	CG3402
FBgn0035146		FBgn0035146	CG13893
FBgn0035141		FBgn0035141	Cypl
FBgn0035155		FBgn0035155	RabX6
FBgn0035165		FBgn0035165	CG13887
FBgn0035169		FBgn0035169	CG13890
FBgn0035173		FBgn0035173	CG13907
FBgn0035164		FBgn0035164	CG13901
FBgn0035154		FBgn0035154	CG3344
FBgn0035203		FBgn0035203	CG9149
FBgn0010246		FBgn0010246	Myo61F
FBgn0011361		FBgn0011361	ND-ACP
FBgn0004635		FBgn0004635	rho
FBgn0028577		FBgn0028577	hfp
FBgn0010333		FBgn0010333	Rac1
FBgn0035236		FBgn0035236	CG12004
FBgn0013753		FBgn0013753	Bgb
FBgn0035252		FBgn0035252	CG7970
FBgn0011573		FBgn0011573	Cdc37
FBgn0067864		FBgn0067864	Patj
FBgn0250789		FBgn0250789	alpha-Spec
FBgn0035271		FBgn0035271	CG2021
FBgn0022702		FBgn0022702	Cht2
FBgn0035253		FBgn0035253	CG7971
FBgn0035251		FBgn0035251	Vta1
FBgn0035246		FBgn0035246	CG13928
FBgn0035243		FBgn0035243	CG13926
FBgn0035285		FBgn0035285	CG12025
FBgn0035294		FBgn0035294	Mfap1
FBgn0086906		FBgn0086906	sls
FBgn0027547		FBgn0027547	CG1927
FBgn0002183		FBgn0002183	dre4
FBgn0042712		FBgn0042712	HBS1
FBgn0004636		FBgn0004636	Rap1
FBgn0040507		FBgn0040507	ACXD
FBgn0035323		FBgn0035323	CG13807
FBgn0035335		FBgn0035335	mRpL23
FBgn0026593		FBgn0026593	CG5707
FBgn0035359		FBgn0035359	CG1143
FBgn0035348		FBgn0035348	CG16758
FBgn0035370		FBgn0035370	Non2
FBgn0040308		FBgn0040308	Jafrac2
FBgn0035393		FBgn0035393	CG16753
FBgn0035390		FBgn0035390	scramb2
FBgn0035371		FBgn0035371	AhcyL1
FBgn0283461		FBgn0283461	Drs
FBgn0035444		FBgn0035444	CG12012
FBgn0027616		FBgn0027616	YT521-B
FBgn0266582		FBgn0266582	ND-30
FBgn0035402		FBgn0035402	Usp5
FBgn0052267		FBgn0052267	CG32267
FBgn0026259		FBgn0026259	eIF5B
FBgn0035471		FBgn0035471	Sc2
FBgn0027552		FBgn0027552	CG10863
FBgn0035473		FBgn0035473	mge
FBgn0035483		FBgn0035483	Mul1
FBgn0003206		FBgn0003206	Ras64B
FBgn0035519		FBgn0035519	CG1309
FBgn0035526		FBgn0035526	CG1316
FBgn0035520		FBgn0035520	CG11586
FBgn0001257		FBgn0001257	ImpL2
FBgn0004574		FBgn0004574	Rop
FBgn0260985		FBgn0260985	RfC4
FBgn0264693		FBgn0264693	ens
FBgn0052250		FBgn0052250	PMP34
FBgn0035534		FBgn0035534	mRpS6
FBgn0015805		FBgn0015805	HDAC1
FBgn0035541		FBgn0035541	CG15019
FBgn0035532		FBgn0035532	CG15014
FBgn0025111		FBgn0025111	Ant2
FBgn0030263		FBgn0030263	CG2076
FBgn0028686		FBgn0028686	Rpt3
FBgn0030269		FBgn0030269	CDK2AP1
FBgn0020255		FBgn0020255	Ran
FBgn0010391		FBgn0010391	Gtp-bp
FBgn0030306		FBgn0030306	Spase25
FBgn0030311		FBgn0030311	CG11699
FBgn0266421		FBgn0266421	RPA3
FBgn0000618		FBgn0000618	e(y)2
FBgn0030309		FBgn0030309	CG1572
FBgn0030329		FBgn0030329	prtp
FBgn0030347		FBgn0030347	CG15739
FBgn0030350		FBgn0030350	SelG
FBgn0030351		FBgn0030351	CG1840
FBgn0030332		FBgn0030332	CG9360
FBgn0030365		FBgn0030365	Tango4
FBgn0030400		FBgn0030400	CG11138
FBgn0030434		FBgn0030434	Brms1
FBgn0029133		FBgn0029133	REG
FBgn0030468		FBgn0030468	CG1622
FBgn0030478		FBgn0030478	CG1640
FBgn0030481		FBgn0030481	CG1662
FBgn0030482		FBgn0030482	CG1673
FBgn0030503		FBgn0030503	Tango2
FBgn0030521		FBgn0030521	CtsB1
FBgn0030520		FBgn0030520	Pdcd4
FBgn0000173		FBgn0000173	ben
FBgn0030552		FBgn0030552	mRpL38
FBgn0030572		FBgn0030572	mRpS25
FBgn0030605		FBgn0030605	ND-B18
FBgn0030610		FBgn0030610	CG9065
FBgn0027601		FBgn0027601	pdgy
FBgn0004924		FBgn0004924	Top1
FBgn0030631		FBgn0030631	CG6227
FBgn0014455		FBgn0014455	Ahcy
FBgn0030641		FBgn0030641	CG6299
FBgn0030653		FBgn0030653	CG7860
FBgn0030658		FBgn0030658	CG7872
FBgn0030672		FBgn0030672	CG9281
FBgn0030670		FBgn0030670	Pis
FBgn0030669		FBgn0030669	CG9240
FBgn0030720		FBgn0030720	CG8939
FBgn0014391		FBgn0014391	sun
FBgn0030731		FBgn0030731	Mfe2
FBgn0004066		FBgn0004066	Prosalpha4
FBgn0030733		FBgn0030733	UQCR-14
FBgn0004432		FBgn0004432	Cyp1
FBgn0030745		FBgn0030745	CG4239
FBgn0262734		FBgn0262734	eIF4H1
FBgn0011826		FBgn0011826	Pp2B-14D
FBgn0030752		FBgn0030752	CG9947
FBgn0030788		FBgn0030788	Sap30
FBgn0027556		FBgn0027556	CG4928
FBgn0030802		FBgn0030802	DENR
FBgn0030791		FBgn0030791	CG9132
FBgn0260747		FBgn0260747	CG5010
FBgn0030806		FBgn0030806	CG13001
FBgn0030805		FBgn0030805	wus
FBgn0024238		FBgn0024238	Fim
FBgn0030853		FBgn0030853	ND-24
FBgn0250788		FBgn0250788	beta-Spec
FBgn0030870		FBgn0030870	CG6398
FBgn0030872		FBgn0030872	Ucp4A
FBgn0030871		FBgn0030871	CG8142
FBgn0030878		FBgn0030878	CG6769
FBgn0283469		FBgn0283469	Vps4
FBgn0030915		FBgn0030915	CG6179
FBgn0030945		FBgn0030945	Ing3
FBgn0030944		FBgn0030944	CG6617
FBgn0027335		FBgn0027335	Rip11
FBgn0030930		FBgn0030930	GalNAc-T2
FBgn0030955		FBgn0030955	CG6891
FBgn0030969		FBgn0030969	Usp39
FBgn0030968		FBgn0030968	CG7322
FBgn0030991		FBgn0030991	CG7453
FBgn0030993		FBgn0030993	Mec2
FBgn0030990		FBgn0030990	CG7556
FBgn0027621		FBgn0027621	Pfrx
FBgn0031037		FBgn0031037	CG14207
FBgn0031054		FBgn0031054	Ssu72
FBgn0004057		FBgn0004057	Zw
FBgn0086384		FBgn0086384	Mer
FBgn0031050		FBgn0031050	Arp10
FBgn0031036		FBgn0031036	CG14220
FBgn0031062		FBgn0031062	CG14230
FBgn0010380		FBgn0010380	AP-1-2beta
FBgn0052528		FBgn0052528	parvin
FBgn0031069		FBgn0031069	Pmp70
FBgn0031061		FBgn0031061	CG14232
FBgn0036945		FBgn0036945	Ssk
FBgn0024814		FBgn0024814	Clc
FBgn0250791		FBgn0250791	alphaSnap
FBgn0013799		FBgn0013799	Deaf1
FBgn0036928		FBgn0036928	Tom20
FBgn0036927		FBgn0036927	Gabat
FBgn0029094		FBgn0029094	asf1
FBgn0022774		FBgn0022774	Oat
FBgn0036887		FBgn0036887	CG9231
FBgn0005564		FBgn0005564	Shal
FBgn0036847		FBgn0036847	CG11577
FBgn0000261		FBgn0000261	Cat
FBgn0036821		FBgn0036821	CG3961
FBgn0036816		FBgn0036816	Indy
FBgn0036771		FBgn0036771	CG14353
FBgn0040793		FBgn0040793	CG7630
FBgn0036726		FBgn0036726	QIL1
FBgn0036702		FBgn0036702	CG6512
FBgn0010352		FBgn0010352	Nc73EF
FBgn0021768		FBgn0021768	nudC
FBgn0036667		FBgn0036667	CG9669
FBgn0036663		FBgn0036663	CG9674
FBgn0025582		FBgn0025582	eIF3e
FBgn0260960		FBgn0260960	Baldspot
FBgn0017572		FBgn0017572	Mo25
FBgn0002284		FBgn0002284	Prosbeta6
FBgn0036641		FBgn0036641	Smn
FBgn0027080		FBgn0027080	TyrRS
FBgn0014163		FBgn0014163	fax
FBgn0036622		FBgn0036622	CG4753
FBgn0003076		FBgn0003076	Pgm
FBgn0263603		FBgn0263603	Zn72D
FBgn0036547		FBgn0036547	CG17032
FBgn0036551		FBgn0036551	CG17029
FBgn0036553		FBgn0036553	CG17027
FBgn0000115		FBgn0000115	Arl1
FBgn0036537		FBgn0036537	CG18081
FBgn0036500		FBgn0036500	CG7275
FBgn0036501		FBgn0036501	CG7272
FBgn0023174		FBgn0023174	Prosbeta2
FBgn0036488		FBgn0036488	CG6878
FBgn0029148		FBgn0029148	NHP2
FBgn0036422		FBgn0036422	CG3868
FBgn0250848		FBgn0250848	26-29-p
FBgn0026418		FBgn0026418	Hsc70Cb
FBgn0061515		FBgn0061515	endos
FBgn0036372		FBgn0036372	Abp1
FBgn0260049		FBgn0260049	flr
FBgn0036342		FBgn0036342	CG11279
FBgn0036316		FBgn0036316	CG10960
FBgn0036314		FBgn0036314	Sf3a2
FBgn0261933		FBgn0261933	SmD1
FBgn0036300		FBgn0036300	Pmm2
FBgn0036298		FBgn0036298	nst
FBgn0004926		FBgn0004926	eIF2beta
FBgn0020655		FBgn0020655	ArfGAP1
FBgn0036272		FBgn0036272	CG4300
FBgn0022709		FBgn0022709	Adk1
FBgn0022959		FBgn0022959	yps
FBgn0036239		FBgn0036239	Pop2
FBgn0036173		FBgn0036173	CG7394
FBgn0036135		FBgn0036135	mRpL2
FBgn0036136		FBgn0036136	Ufd1-like
FBgn0047038		FBgn0047038	ND-13B
FBgn0052056		FBgn0052056	scramb1
FBgn0036007		FBgn0036007	path
FBgn0001224		FBgn0001224	Hsp23
FBgn0001225		FBgn0001225	Hsp26
FBgn0035978		FBgn0035978	UGP
FBgn0011787		FBgn0011787	mRpL12
FBgn0035947		FBgn0035947	Srp68
FBgn0040827		FBgn0040827	CG13315
FBgn0086706		FBgn0086706	pix
FBgn0035904		FBgn0035904	GstO3
FBgn0017430		FBgn0017430	Nelf-E
FBgn0035911		FBgn0035911	CG6638
FBgn0035906		FBgn0035906	GstO2
FBgn0001248		FBgn0001248	Idh
FBgn0015793		FBgn0015793	Rab19
FBgn0035871		FBgn0035871	BI-1
FBgn0035853		FBgn0035853	UbcE2M
FBgn0262716		FBgn0262716	Arp3
FBgn0035830		FBgn0035830	CG8209
FBgn0035825		FBgn0035825	CG8111
FBgn0028648		FBgn0028648	mRpL50
FBgn0001104		FBgn0001104	Galphai
FBgn0035724		FBgn0035724	CG10064
FBgn0261445		FBgn0261445	sgl
FBgn0035720		FBgn0035720	CG10077
FBgn0005626		FBgn0005626	ple
FBgn0035692		FBgn0035692	Sf3b6
FBgn0022699		FBgn0022699	D19B
FBgn0052409		FBgn0052409	CG32409
FBgn0035679		FBgn0035679	CG10467
FBgn0035678		FBgn0035678	CG10469
FBgn0002638		FBgn0002638	Rcc1
FBgn0035631		FBgn0035631	Txl
FBgn0035639		FBgn0035639	kri
FBgn0052418		FBgn0052418	vito
FBgn0263106		FBgn0263106	DnaJ-1
FBgn0035622		FBgn0035622	TM9SF3
FBgn0015766		FBgn0015766	Msr-110
FBgn0029118		FBgn0029118	Sucb
FBgn0035600		FBgn0035600	Cyt-c1
FBgn0035589		FBgn0035589	CHMP2B
FBgn0010747		FBgn0010747	Srp54k
FBgn0035588		FBgn0035588	CG10672
FBgn0020369		FBgn0020369	Rpt6
FBgn0015379		FBgn0015379	dod
FBgn0011710		FBgn0011710	2023-09-01
FBgn0003423		FBgn0003423	slgA
FBgn0001565		FBgn0001565	Hlc
FBgn0015527		FBgn0015527	peng
FBgn0052521		FBgn0052521	CG32521
FBgn0031148		FBgn0031148	Cbs
FBgn0027334		FBgn0027334	l(1)G0004
FBgn0031117		FBgn0031117	GstT3
FBgn0031106		FBgn0031106	Syx16
FBgn0031097		FBgn0031097	obst-A
FBgn0022770		FBgn0022770	Peritrophin-A
FBgn0031099		FBgn0031099	CG17065
FBgn0031098		FBgn0031098	CG17068
FBgn0031645		FBgn0031645	CG3036
FBgn0031601		FBgn0031601	Dim1
FBgn0031603		FBgn0031603	CG15432
FBgn0031607		FBgn0031607	CG15440
FBgn0031580		FBgn0031580	CG15423
FBgn0021967		FBgn0021967	ND-PDSW
FBgn0261560		FBgn0261560	Thor
FBgn0014906		FBgn0014906	Hydr2
FBgn0031529		FBgn0031529	CG9662
FBgn0031505		FBgn0031505	ND-B14.5B
FBgn0283427		FBgn0283427	FASN1
FBgn0031497		FBgn0031497	SerRS
FBgn0024947		FBgn0024947	NTPase
FBgn0051694		FBgn0051694	CG31694
FBgn0031453		FBgn0031453	Bacc
FBgn0031458		FBgn0031458	aph-1
FBgn0031436		FBgn0031436	ND-B17.2
FBgn0267972		FBgn0267972	Der-1
FBgn0031381		FBgn0031381	Npc2a
FBgn0010288		FBgn0010288	Uch
FBgn0031359		FBgn0031359	Rim2
FBgn0031307		FBgn0031307	MFS3
FBgn0031322		FBgn0031322	CG5001
FBgn0024314		FBgn0024314	Plap
FBgn0031313		FBgn0031313	CG5080
FBgn0010583		FBgn0010583	dock
FBgn0020305		FBgn0020305	dbe
FBgn0031287		FBgn0031287	CG4291
FBgn0031286		FBgn0031286	CG3862
FBgn0031256		FBgn0031256	shv
FBgn0031263		FBgn0031263	Tspo
FBgn0031268		FBgn0031268	cold
FBgn0010602		FBgn0010602	lwr
FBgn0031253		FBgn0031253	CG11885
FBgn0001142		FBgn0001142	Gs1
FBgn0024352		FBgn0024352	Hop
FBgn0017457		FBgn0017457	U2af38
FBgn0031245		FBgn0031245	CG3625
FBgn0036998		FBgn0036998	CG5969
FBgn0037024		FBgn0037024	tzn
FBgn0037057		FBgn0037057	CG10512
FBgn0037051		FBgn0037051	CG10565
FBgn0259785		FBgn0259785	pzg
FBgn0015283		FBgn0015283	Rpn10
FBgn0012034		FBgn0012034	AcCoAS
FBgn0052446		FBgn0052446	Atox1
FBgn0037135		FBgn0037135	CG7414
FBgn0037138		FBgn0037138	P5CDh1
FBgn0037130		FBgn0037130	Syn1
FBgn0037151		FBgn0037151	CG7130
FBgn0037156		FBgn0037156	CG11523
FBgn0037185		FBgn0037185	CG11367
FBgn0037186		FBgn0037186	CG11241
FBgn0037203		FBgn0037203	slif
FBgn0026077		FBgn0026077	Gasp
FBgn0037374		FBgn0037374	jagn
FBgn0028690		FBgn0028690	Rpn5
FBgn0037391		FBgn0037391	CG2017
FBgn0037329		FBgn0037329	POLDIP2
FBgn0041191		FBgn0041191	Rheb
FBgn0283535		FBgn0283535	Vha26
FBgn0051549		FBgn0051549	CG31549
FBgn0037354		FBgn0037354	CG12171
FBgn0037364		FBgn0037364	Rab23
FBgn0051548		FBgn0051548	CG31548
FBgn0037342		FBgn0037342	CG2931
FBgn0086768		FBgn0086768	Pcmt
FBgn0051547		FBgn0051547	CG31547
FBgn0003275		FBgn0003275	RpII18
FBgn0250746		FBgn0250746	Prosbeta7
FBgn0037312		FBgn0037312	CG11999
FBgn0037298		FBgn0037298	CG2604
FBgn0010750		FBgn0010750	atms
FBgn0027570		FBgn0027570	Nep2
FBgn0037270		FBgn0037270	eIF3f1
FBgn0037261		FBgn0037261	CG9775
FBgn0041605		FBgn0041605	cpx
FBgn0263594		FBgn0263594	lost
FBgn0031662		FBgn0031662	CG3792
FBgn0031684		FBgn0031684	ND-13A
FBgn0028694		FBgn0028694	Rpn11
FBgn0053113		FBgn0053113	Rtnl1
FBgn0031663		FBgn0031663	CG8891
FBgn0262467		FBgn0262467	Scox
FBgn0015834		FBgn0015834	eIF3i
FBgn0031651		FBgn0031651	mRpL24
FBgn0000318		FBgn0000318	cl
FBgn0002525		FBgn0002525	Lam
FBgn0014189		FBgn0014189	Hel25E
FBgn0001128		FBgn0001128	Gpdh
FBgn0001942		FBgn0001942	eIF4A
FBgn0031768		FBgn0031768	CG12393
FBgn0284255		FBgn0284255	Arpc4
FBgn0031771		FBgn0031771	ND-51
FBgn0015623		FBgn0015623	Cpr
FBgn0031815		FBgn0031815	frj
FBgn0031824		FBgn0031824	CG9547
FBgn0086357		FBgn0086357	Sec61alpha
FBgn0259749		FBgn0259749	mmy
FBgn0031830		FBgn0031830	COX5B
FBgn0263916		FBgn0263916	Ent2
FBgn0028990		FBgn0028990	Spn27A
FBgn0004838		FBgn0004838	Hrb27C
FBgn0021944		FBgn0021944	Coprox
FBgn0016978		FBgn0016978	snRNP-U1-70K
FBgn0028554		FBgn0028554	x16
FBgn0026196		FBgn0026196	nop5
FBgn0015777		FBgn0015777	nrv2
FBgn0015776		FBgn0015776	nrv1
FBgn0031897		FBgn0031897	CG13784
FBgn0031882		FBgn0031882	Rab30
FBgn0283658		FBgn0283658	muc
FBgn0031913		FBgn0031913	CG5958
FBgn0031909		FBgn0031909	CG5181
FBgn0044323		FBgn0044323	Cka
FBgn0261790		FBgn0261790	SmE
FBgn0032022		FBgn0032022	CG14275
FBgn0003607		FBgn0003607	Su(var)205
FBgn0027932		FBgn0027932	Akap200
FBgn0032053		FBgn0032053	mRpL51
FBgn0032050		FBgn0032050	CG13096
FBgn0263852		FBgn0263852	Dad1
FBgn0027094		FBgn0027094	AlaRS
FBgn0032059		FBgn0032059	PrBP
FBgn0012036		FBgn0012036	Aldh
FBgn0040070		FBgn0040070	Trx-2
FBgn0286786		FBgn0286786
FBgn0000273		FBgn0000273	Pka-C1
FBgn0004868		FBgn0004868	Gdi
FBgn0032140		FBgn0032140	CG13117
FBgn0283478		FBgn0283478	und
FBgn0029174		FBgn0029174	FKBP59
FBgn0024285		FBgn0024285	Srp54
FBgn0011584		FBgn0011584	Trp1
FBgn0287720		FBgn0287720
FBgn0032229		FBgn0032229	CG5045
FBgn0003942		FBgn0003942	RpS27A
FBgn0025366		FBgn0025366	Ip259
FBgn0086347		FBgn0086347	Myo31DF
FBgn0053303		FBgn0053303	CG33303
FBgn0011305		FBgn0011305	Rsf1
FBgn0032292		FBgn0032292	EMC3
FBgn0032321		FBgn0032321	YL-1
FBgn0250837		FBgn0250837	dUTPase
FBgn0069354		FBgn0069354	Porin2
FBgn0032345		FBgn0032345	CG14921
FBgn0032393		FBgn0032393	CG12264
FBgn0010497		FBgn0010497	dmGlut
FBgn0032394		FBgn0032394	CG6746
FBgn0027081		FBgn0027081	ThrRS
FBgn0015797		FBgn0015797	Rab6
FBgn0043841		FBgn0043841	vir-1
FBgn0032445		FBgn0032445	CG6153
FBgn0032454		FBgn0032454	CG5787
FBgn0032449		FBgn0032449	CG17036
FBgn0032444		FBgn0032444	CCT4
FBgn0265262		FBgn0265262	Vha68-1
FBgn0032478		FBgn0032478	CG5458
FBgn0032509		FBgn0032509	CG6523
FBgn0032511		FBgn0032511	ND-B22
FBgn0026373		FBgn0026373	RpII33
FBgn0019890		FBgn0019890	Smg5
FBgn0001961		FBgn0001961	Arpc1
FBgn0027348		FBgn0027348	bgm
FBgn0040228		FBgn0040228	DCTN5-p25
FBgn0024183		FBgn0024183	vig
FBgn0010422		FBgn0010422	TfIIS
FBgn0086691		FBgn0086691	UK114
FBgn0025678		FBgn0025678	CaBP1
FBgn0261068		FBgn0261068	LSm7
FBgn0032596		FBgn0032596	Prosbeta4
FBgn0032634		FBgn0032634	Rpb11
FBgn0015808		FBgn0015808	ScpX
FBgn0086446		FBgn0086446	DCTN6-p27
FBgn0086443		FBgn0086443	AsnRS
FBgn0002031		FBgn0002031	l(2)37Cc
FBgn0032731		FBgn0032731	Swip-1
FBgn0032729		FBgn0032729	CG10639
FBgn0032781		FBgn0032781	RtcB
FBgn0041789		FBgn0041789	Pax
FBgn0032774		FBgn0032774	CG17549
FBgn0032773		FBgn0032773	fon
FBgn0041180		FBgn0041180	Tep4
FBgn0284220		FBgn0284220	Top2
FBgn0032864		FBgn0032864	CG2493
FBgn0032884		FBgn0032884	Pomp
FBgn0032897		FBgn0032897	CG9336
FBgn0032899		FBgn0032899	CG9338
FBgn0032906		FBgn0032906	RPA2
FBgn0037503		FBgn0037503	CG14598
FBgn0014863		FBgn0014863	Mlp84B
FBgn0262801		FBgn0262801	twr
FBgn0037429		FBgn0037429	Osi19
FBgn0010282		FBgn0010282	TfIIFalpha
FBgn0261789		FBgn0261789	SmD2
FBgn0051472		FBgn0051472	sgll
FBgn0037537		FBgn0037537	CG2767
FBgn0037534		FBgn0037534	CG2781
FBgn0037533		FBgn0037533	CD98hc
FBgn0037573		FBgn0037573	CG7483
FBgn0037580		FBgn0037580	DppIII
FBgn0051460		FBgn0051460	CG31460
FBgn0263231		FBgn0263231	bel
FBgn0037632		FBgn0037632	CCT7
FBgn0037637		FBgn0037637	IscU
FBgn0037643		FBgn0037643	skap
FBgn0010803		FBgn0010803	TrpRS
FBgn0000412		FBgn0000412	D1
FBgn0010222		FBgn0010222	Nmdmc
FBgn0026380		FBgn0026380	Prosbeta3
FBgn0037678		FBgn0037678	CG16749
FBgn0037707		FBgn0037707	RnpS1
FBgn0037723		FBgn0037723	SpdS
FBgn0037728		FBgn0037728	CG16817
FBgn0003886		FBgn0003886	alphaTub85E
FBgn0069242		FBgn0069242	eca
FBgn0005585		FBgn0005585	Calr
FBgn0037715		FBgn0037715	CG9399
FBgn0037710		FBgn0037710	CG9393
FBgn0024833		FBgn0024833	AP-1mu
FBgn0003205		FBgn0003205	Ras85D
FBgn0267790		FBgn0267790	rump
FBgn0037754		FBgn0037754	CG8500
FBgn0002868		FBgn0002868	MtnA
FBgn0037749		FBgn0037749	CG9471
FBgn0266720		FBgn0266720	Snap24
FBgn0028734		FBgn0028734	Fmr1
FBgn0040078		FBgn0040078	pont
FBgn0024957		FBgn0024957	Irp-1B
FBgn0020385		FBgn0020385	pug
FBgn0037848		FBgn0037848	Tsp86D
FBgn0267376		FBgn0267376	SelR
FBgn0037834		FBgn0037834	Art1
FBgn0022359		FBgn0022359	Sodh-2
FBgn0037853		FBgn0037853	CG14696
FBgn0037883		FBgn0037883	CG14701
FBgn0037891		FBgn0037891	CG5214
FBgn0037890		FBgn0037890	CG17734
FBgn0037878		FBgn0037878	CG6693
FBgn0037873		FBgn0037873	SdhC
FBgn0037899		FBgn0037899	RpL24-like
FBgn0037930		FBgn0037930	CG14715
FBgn0011290		FBgn0011290	Taf12
FBgn0051363		FBgn0051363	Jupiter
FBgn0260743		FBgn0260743	GC1
FBgn0260745		FBgn0260745	mfas
FBgn0037973		FBgn0037973	CG18547
FBgn0010038		FBgn0010038	GstD2
FBgn0010041		FBgn0010041	GstD5
FBgn0010043		FBgn0010043	GstD7
FBgn0038038		FBgn0038038	CG5167
FBgn0038043		FBgn0038043	CG17202
FBgn0086134		FBgn0086134	Prosalpha2
FBgn0029512		FBgn0029512	Aos1
FBgn0000455		FBgn0000455	Dip-C
FBgn0042206		FBgn0042206	GstD10
FBgn0086687		FBgn0086687	Desat1
FBgn0013278		FBgn0013278	Hsp70Bb
FBgn0038065		FBgn0038065	Snx3
FBgn0011745		FBgn0011745	Arp1
FBgn0016693		FBgn0016693	Past1
FBgn0038080		FBgn0038080	CG12279
FBgn0001296		FBgn0001296	kar
FBgn0020496		FBgn0020496	CtBP
FBgn0002354		FBgn0002354	l(3)87Df
FBgn0001217		FBgn0001217	Hsc70-2
FBgn0038145		FBgn0038145	Droj2
FBgn0038149		FBgn0038149	GILT1
FBgn0004587		FBgn0004587	B52
FBgn0038180		FBgn0038180	Cht5
FBgn0000454		FBgn0000454	Dip-B
FBgn0038166		FBgn0038166	CG9588
FBgn0263396		FBgn0263396	sqd
FBgn0016672		FBgn0016672	Ipp
FBgn0038198		FBgn0038198	Npc2b
FBgn0004855		FBgn0004855	RpII15
FBgn0004629		FBgn0004629	Cys
FBgn0038243		FBgn0038243	CG8066
FBgn0051313		FBgn0051313	CG31313
FBgn0266064		FBgn0266064	GlyS
FBgn0014879		FBgn0014879	Set
FBgn0026441		FBgn0026441	ear
FBgn0038326		FBgn0038326	CG5044
FBgn0013269		FBgn0013269	FK506-bp1
FBgn0267408		FBgn0267408	AOX1
FBgn0013334		FBgn0013334	Sap47
FBgn0027657		FBgn0027657	glob1
FBgn0283477		FBgn0283477	SF2
FBgn0287225		FBgn0287225
FBgn0038407		FBgn0038407	CG6126
FBgn0038400		FBgn0038400	CG5903
FBgn0044826		FBgn0044826	Pak3
FBgn0038420		FBgn0038420	CG10311
FBgn0015520		FBgn0015520	nonA-l
FBgn0015019		FBgn0015019	CCT3
FBgn0022344		FBgn0022344	CG10340
FBgn0266465		FBgn0266465	GckIII
FBgn0038519		FBgn0038519	Prx3
FBgn0022943		FBgn0022943	Cbp20
FBgn0038585		FBgn0038585	Non3
FBgn0026250		FBgn0026250	eIF1A
FBgn0028670		FBgn0028670	Vha100-2
FBgn0027785		FBgn0027785	NP15.6
FBgn0038675		FBgn0038675	CG6013
FBgn0038678		FBgn0038678	mRpL55
FBgn0038723		FBgn0038723	CG6195
FBgn0038742		FBgn0038742	Arc42
FBgn0021776		FBgn0021776	mira
FBgn0038746		FBgn0038746	Surf6
FBgn0038803		FBgn0038803	CG5191
FBgn0038806		FBgn0038806	CG5412
FBgn0038810		FBgn0038810	Srp72
FBgn0014029		FBgn0014029	2023-09-02
FBgn0038805		FBgn0038805	TFAM
FBgn0027493		FBgn0027493	AdSS
FBgn0010770		FBgn0010770	ppan
FBgn0038857		FBgn0038857	Bdbt
FBgn0003257		FBgn0003257	r-l
FBgn0025865		FBgn0025865	Cortactin
FBgn0038868		FBgn0038868	CG5862
FBgn0043012		FBgn0043012	AP-2sigma
FBgn0019957		FBgn0019957	ND-42
FBgn0038922		FBgn0038922	CG6439
FBgn0038965		FBgn0038965	mats
FBgn0038964		FBgn0038964	Nop56
FBgn0038948		FBgn0038948	PSR
FBgn0263351		FBgn0263351	AP-2mu
FBgn0260942		FBgn0260942	bond
FBgn0038989		FBgn0038989	CG6937
FBgn0263863		FBgn0263863	mRpL45
FBgn0003676		FBgn0003676	CCT1
FBgn0028688		FBgn0028688	Rpn7
FBgn0039019		FBgn0039019	HP1c
FBgn0027526		FBgn0027526	Ublcp1
FBgn0039051		FBgn0039051	CG17109
FBgn0039069		FBgn0039069	CG6763
FBgn0016119		FBgn0016119	ATPsynCF6
FBgn0039109		FBgn0039109	CG10365
FBgn0028684		FBgn0028684	Rpt5
FBgn0039112		FBgn0039112	SdhD
FBgn0039110		FBgn0039110	RanBP3
FBgn0039094		FBgn0039094	CG10184
FBgn0015795		FBgn0015795	Rab7
FBgn0051184		FBgn0051184	LSm3
FBgn0005674		FBgn0005674	GluProRS
FBgn0039129		FBgn0039129	RpS19b
FBgn0015282		FBgn0015282	Rpt2
FBgn0013347		FBgn0013347	TfIIA-S
FBgn0026576		FBgn0026576	CG5991
FBgn0039156		FBgn0039156	CG6178
FBgn0001230		FBgn0001230	Hsp68
FBgn0005649		FBgn0005649	Rox8
FBgn0086365		FBgn0086365	Orct2
FBgn0019952		FBgn0019952	Orct
FBgn0039178		FBgn0039178	CG6356
FBgn0039186		FBgn0039186	CG5746
FBgn0039175		FBgn0039175	beta-PheRS
FBgn0039233		FBgn0039233	CG7006
FBgn0039241		FBgn0039241	CG11089
FBgn0051118		FBgn0051118	RabX4
FBgn0039223		FBgn0039223	CG5805
FBgn0039219		FBgn0039219	CG13630
FBgn0039270		FBgn0039270	PQBP1
FBgn0011336		FBgn0011336	Stt3B
FBgn0039259		FBgn0039259	CG11781
FBgn0020626		FBgn0020626	Osbp
FBgn0039305		FBgn0039305	CG11858
FBgn0039304		FBgn0039304	CG10425
FBgn0039300		FBgn0039300	RpS27
FBgn0039349		FBgn0039349	Ssadh
FBgn0039358		FBgn0039358	CG5028
FBgn0002735		FBgn0002735	E(spl)mgamma-HLH
FBgn0002633		FBgn0002633	E(spl)m7-HLH
FBgn0039402		FBgn0039402	Vps2
FBgn0002733		FBgn0002733	E(spl)mbeta-HLH
FBgn0039427		FBgn0039427	CG5447
FBgn0001197		FBgn0001197	His2Av
FBgn0039464		FBgn0039464	CG6330
FBgn0029155		FBgn0029155	Men-b
FBgn0039494		FBgn0039494	grass
FBgn0042111		FBgn0042111	CG18766
FBgn0039487		FBgn0039487	gb
FBgn0015737		FBgn0015737	Hmu
FBgn0040080		FBgn0040080	pins
FBgn0039537		FBgn0039537	CG5590
FBgn0086346		FBgn0086346	ALiX
FBgn0039557		FBgn0039557	CG12259
FBgn0039580		FBgn0039580	Gfat2
FBgn0265274		FBgn0265274	Inx3
FBgn0003093		FBgn0003093	Pkc98E
FBgn0039635		FBgn0039635	CG11876
FBgn0028671		FBgn0028671	Vha100-1
FBgn0028692		FBgn0028692	Rpn2
FBgn0014427		FBgn0014427	CG11899
FBgn0003525		FBgn0003525	stg
FBgn0062442		FBgn0062442	Cisd2
FBgn0041186		FBgn0041186	Slbp
FBgn0041588		FBgn0041588	eIF2D
FBgn0039665		FBgn0039665	CG2310
FBgn0040623		FBgn0040623	Spase12
FBgn0039674		FBgn0039674	CG1907
FBgn0025457		FBgn0025457	Bub3
FBgn0039689		FBgn0039689	CIA30
FBgn0039691		FBgn0039691	IntS11
FBgn0039698		FBgn0039698	CG7789
FBgn0039709		FBgn0039709	Cad99C
FBgn0051038		FBgn0051038	CG31038
FBgn0039705		FBgn0039705	Atg16
FBgn0002924		FBgn0002924	ncd
FBgn0003512		FBgn0003512	Sry-delta
FBgn0039743		FBgn0039743	CG7946
FBgn0260860		FBgn0260860	Bet5
FBgn0039756		FBgn0039756	CG9743
FBgn0039754		FBgn0039754	CG9747
FBgn0001280		FBgn0001280	janA
FBgn0039735		FBgn0039735	Nph
FBgn0015221		FBgn0015221	Fer2LCH
FBgn0039774		FBgn0039774	CDase
FBgn0039790		FBgn0039790	CG2246
FBgn0028646		FBgn0028646	aralar1
FBgn0002413		FBgn0002413	dco
FBgn0010808		FBgn0010808	Chchd3
FBgn0039828		FBgn0039828	CG1542
FBgn0039830		FBgn0039830	ATPsynC
FBgn0051004		FBgn0051004	mesh
FBgn0039844		FBgn0039844	CG1607
FBgn0039849		FBgn0039849	CG11334
FBgn0039873		FBgn0039873	Smvt
FBgn0000043		FBgn0000043	Act42A
FBgn0042083		FBgn0042083	CG3267
FBgn0033101		FBgn0033101	CG9436
FBgn0033089		FBgn0033089	CG17266
FBgn0033081		FBgn0033081	geminin
FBgn0033079		FBgn0033079	Fmo-2
FBgn0026761		FBgn0026761	Trap1
FBgn0262736		FBgn0262736	Vha16-1
FBgn0014028		FBgn0014028	SdhB
FBgn0029506		FBgn0029506	Tsp42Ee
FBgn0029507		FBgn0029507	Tsp42Ed
FBgn0265935		FBgn0265935	coro
FBgn0000615		FBgn0000615	exu
FBgn0050147		FBgn0050147	Hil
FBgn0005655		FBgn0005655	PCNA
FBgn0034455		FBgn0034455	CG11007
FBgn0034422		FBgn0034422	CG7137
FBgn0266711		FBgn0266711	EloC
FBgn0034443		FBgn0034443	cer
FBgn0261439		FBgn0261439	SdhA
FBgn0014269		FBgn0014269	prod
FBgn0034398		FBgn0034398	CG15098
FBgn0063497		FBgn0063497	GstE3
FBgn0027835		FBgn0027835	Dp1
FBgn0034345		FBgn0034345	CG5174
FBgn0000566		FBgn0000566	Eip55E
FBgn0261119		FBgn0261119	Prp19
FBgn0028983		FBgn0028983	Spn55B
FBgn0266420		FBgn0266420	Ote
FBgn0062440		FBgn0062440	CG17680
FBgn0034258		FBgn0034258	eIF3c
FBgn0034259		FBgn0034259	P32
FBgn0034237		FBgn0034237	eIF3b
FBgn0010591		FBgn0010591	Sply
FBgn0014870		FBgn0014870	Psi
FBgn0010213		FBgn0010213	Sod2
FBgn0013763		FBgn0013763	Idgf6
FBgn0034142		FBgn0034142	CG8306
FBgn0010611		FBgn0010611	Hmgs
FBgn0287825		FBgn0287825
FBgn0001308		FBgn0001308	Khc
FBgn0001124		FBgn0001124	Got1
FBgn0034066		FBgn0034066	CG8397
FBgn0010590		FBgn0010590	Prosbeta1
FBgn0034061		FBgn0034061	Ufc1
FBgn0022160		FBgn0022160	Gpo-1
FBgn0022097		FBgn0022097	Vha36-1
FBgn0262512		FBgn0262512	Vha14-1
FBgn0010638		FBgn0010638	Sec61beta
FBgn0010397		FBgn0010397	LamC
FBgn0033906		FBgn0033906	CG8331
FBgn0033913		FBgn0033913	CG8468
FBgn0033926		FBgn0033926	Arc1
FBgn0262739		FBgn0262739	AGO1
FBgn0033883		FBgn0033883	CG16935
FBgn0033876		FBgn0033876	Syngr
FBgn0024556		FBgn0024556	mEFTu1
FBgn0033842		FBgn0033842	cbc
FBgn0053138		FBgn0053138	AGBE
FBgn0027079		FBgn0027079	ValRS
FBgn0033810		FBgn0033810	CG4646
FBgn0002069		FBgn0002069	AspRS
FBgn0033781		FBgn0033781	CG13319
FBgn0004512		FBgn0004512	Mdr49
FBgn0011604		FBgn0011604	Iswi
FBgn0033715		FBgn0033715	CG8490
FBgn0033725		FBgn0033725	Cpr49Ac
FBgn0033735		FBgn0033735	CG8525
FBgn0010238		FBgn0010238	Lac
FBgn0033717		FBgn0033717	CG8839
FBgn0010339		FBgn0010339	128up
FBgn0024732		FBgn0024732	Drep1
FBgn0010621		FBgn0010621	CCT5
FBgn0033665		FBgn0033665	Zip48C
FBgn0011704		FBgn0011704	RnrS
FBgn0033663		FBgn0033663	ERp60
FBgn0033608		FBgn0033608	CG13220
FBgn0024188		FBgn0024188	san
FBgn0015872		FBgn0015872	Drip
FBgn0040763		FBgn0040763	CG18336
FBgn0010423		FBgn0010423	TpnC47D
FBgn0029134		FBgn0029134	Prosbeta5
FBgn0033571		FBgn0033571	Rpb5
FBgn0033570		FBgn0033570	ND-B14
FBgn0033550		FBgn0033550	CG12341
FBgn0033548		FBgn0033548	CG7637
FBgn0024956		FBgn0024956	Mat1
FBgn0033543		FBgn0033543	CG12338
FBgn0005586		FBgn0005586	Rab3
FBgn0033518		FBgn0033518	Prx2540-2
FBgn0033529		FBgn0033529	CG17765
FBgn0033528		FBgn0033528	trsn
FBgn0033507		FBgn0033507	CG12909
FBgn0003660		FBgn0003660	Syb
FBgn0286783		FBgn0286783
FBgn0040773		FBgn0040773	COX7C
FBgn0001291		FBgn0001291	Jra
FBgn0003071		FBgn0003071	Pfk
FBgn0033482		FBgn0033482	CG1371
FBgn0027580		FBgn0027580	PCB
FBgn0028473		FBgn0028473	Non1
FBgn0033378		FBgn0033378	tsu
FBgn0262515		FBgn0262515	VhaAC45
FBgn0028408		FBgn0028408	Drep2
FBgn0260972		FBgn0260972	alc
FBgn0021825		FBgn0021825	DCTN2-p50
FBgn0004921		FBgn0004921	Ggamma1
FBgn0033357		FBgn0033357	Tom7
FBgn0033367		FBgn0033367	PPO2
FBgn0033351		FBgn0033351	AIMP1
FBgn0003074		FBgn0003074	Pgi
FBgn0033341		FBgn0033341	MrgBP
FBgn0033307		FBgn0033307	CG14752
FBgn0033317		FBgn0033317	CG8635
FBgn0033264		FBgn0033264	Nup50
FBgn0005648		FBgn0005648	Pabp2
FBgn0021995		FBgn0021995	Rs1
FBgn0013726		FBgn0013726	pnut
FBgn0010504		FBgn0010504	kermit
FBgn0021814		FBgn0021814	Vps28
FBgn0029093		FBgn0029093	cathD
FBgn0033224		FBgn0033224	Nop17l
FBgn0264294		FBgn0264294	Cyt-b5
FBgn0033205		FBgn0033205	CG2064
FBgn0028687		FBgn0028687	Rpt1
FBgn0050499		FBgn0050499	CG30499
FBgn0033188		FBgn0033188	Drat
FBgn0283450		FBgn0283450	Glo1
FBgn0033127		FBgn0033127	Tsp42Ef
FBgn0033153		FBgn0033153	Gadd45
FBgn0026602		FBgn0026602	Ady43A
FBgn0002930		FBgn0002930	nec
FBgn0010217		FBgn0010217	ATPsynbeta
FBgn0025885		FBgn0025885	Inos
FBgn0266186		FBgn0266186	Vamp7
FBgn0003141		FBgn0003141	pr
FBgn0262728		FBgn0262728	Pal2
FBgn0002921		FBgn0002921	Atpalpha
FBgn0000083		FBgn0000083	AnxB9
FBgn0034277		FBgn0034277	OstDelta
FBgn0037137		FBgn0037137	Nopp140
FBgn0040227		FBgn0040227	eIF3d1
FBgn0043070		FBgn0043070	MESK2
FBgn0050159		FBgn0050159	CG30159
FBgn0029854		FBgn0029854	CG3566
FBgn0260859		FBgn0260859	Bet3
FBgn0265298		FBgn0265298	SC35
FBgn0250785		FBgn0250785	vari
FBgn0003721		FBgn0003721	Tm1
FBgn0023175		FBgn0023175	Prosalpha7
FBgn0032456		FBgn0032456	MRP
FBgn0001297		FBgn0001297	kay
FBgn0261458		FBgn0261458	capt
FBgn0066084		FBgn0066084	RpL41
FBgn0043002		FBgn0043002	Chrac-14
FBgn0000053		FBgn0000053	ade3
FBgn0262519		FBgn0262519	Mi-2
FBgn0010263		FBgn0010263	Rbp9
FBgn0031285		FBgn0031285	CG3662
FBgn0262733		FBgn0262733	Src64B
FBgn0032259		FBgn0032259	CG6144
FBgn0037747		FBgn0037747	CG8481
FBgn0086608		FBgn0086608	CG34112
FBgn0036612		FBgn0036612	CG4998
FBgn0265276		FBgn0265276	l(3)neo38
FBgn0015622		FBgn0015622	Cnx99A
FBgn0262737		FBgn0262737	mub
FBgn0064225		FBgn0064225	RpL5
FBgn0085229		FBgn0085229	CG34200
FBgn0085354		FBgn0085354	CG34325
FBgn0085409		FBgn0085409	smal
FBgn0085468		FBgn0085468	ND-MWFE
FBgn0285925		FBgn0285925
FBgn0000636		FBgn0000636	Fas3
FBgn0010551		FBgn0010551	Phb2
FBgn0265784		FBgn0265784	CrebB
FBgn0286784		FBgn0286784
FBgn0029903		FBgn0029903	pod1
FBgn0030038		FBgn0030038	CG1440
FBgn0032153		FBgn0032153	CG4537
FBgn0034876		FBgn0034876	wmd
FBgn0250820		FBgn0250820	meigo
FBgn0040817		FBgn0040817	CG14132
FBgn0053519		FBgn0053519	Unc-89

## Sheet: Codon Opt 60-70
FBgn0002579		FBgn0002579	RpL36
FBgn0026879		FBgn0026879	CG13364
FBgn0029529		FBgn0029529	CG13365
FBgn0003517		FBgn0003517	sta
FBgn0029709		FBgn0029709	CHOp24
FBgn0029868		FBgn0029868	ND-B16.6
FBgn0086558		FBgn0086558	Ubi-p5E
FBgn0029897		FBgn0029897	RpL17
FBgn0004403		FBgn0004403	RpS14a
FBgn0004404		FBgn0004404	RpS14b
FBgn0040931		FBgn0040931	CG9034
FBgn0004828		FBgn0004828	His3.3B
FBgn0028342		FBgn0028342	ATPsyndelta
FBgn0083167		FBgn0083167	Neb-cGP
FBgn0052672		FBgn0052672	Atg8a
FBgn0034583		FBgn0034583	CG10527
FBgn0016726		FBgn0016726	RpL29
FBgn0011824		FBgn0011824	CG4038
FBgn0010228		FBgn0010228	HmgZ
FBgn0004362		FBgn0004362	HmgD
FBgn0034743		FBgn0034743	RpS16
FBgn0010078		FBgn0010078	RpL23
FBgn0034802		FBgn0034802	CG3800
FBgn0250838		FBgn0250838	roh
FBgn0034877		FBgn0034877	levy
FBgn0023477		FBgn0023477	Taldo
FBgn0263006		FBgn0263006	SERCA
FBgn0035032		FBgn0035032	ATPsynF
FBgn0285950		FBgn0285950
FBgn0002564		FBgn0002564	Lsp1gamma
FBgn0035298		FBgn0035298	SCOT
FBgn0035281		FBgn0035281	Cpr62Bc
FBgn0052278		FBgn0052278	CG32278
FBgn0001233		FBgn0001233	Hsp83
FBgn0004888		FBgn0004888	Scsalpha
FBgn0035499		FBgn0035499	Chd64
FBgn0003360		FBgn0003360	sesB
FBgn0015245		FBgn0015245	Hsp60A
FBgn0030292		FBgn0030292	CG11752
FBgn0001145		FBgn0001145	Gs2
FBgn0030362		FBgn0030362	regucalcin
FBgn0001218		FBgn0001218	Hsc70-3
FBgn0030479		FBgn0030479	Rbp1-like
FBgn0010198		FBgn0010198	RpS15Aa
FBgn0030519		FBgn0030519	CG11151
FBgn0027329		FBgn0027329	CCT6
FBgn0002590		FBgn0002590	RpS5a
FBgn0000617		FBgn0000617	e(y)1
FBgn0021765		FBgn0021765	scu
FBgn0001090		FBgn0001090	bnb
FBgn0031021		FBgn0031021	ND-18
FBgn0031040		FBgn0031040	CG14210
FBgn0260653		FBgn0260653	serp
FBgn0040075		FBgn0040075	rept
FBgn0036824		FBgn0036824	CG3902
FBgn0036762		FBgn0036762	CG7430
FBgn0004401		FBgn0004401	Pep
FBgn0036728		FBgn0036728	UQCR-Q
FBgn0250814		FBgn0250814	UQCR-C2
FBgn0011016		FBgn0011016	SsRbeta
FBgn0286818		FBgn0286818
FBgn0040487		FBgn0040487	BobA
FBgn0026409		FBgn0026409	Mpcp
FBgn0036334		FBgn0036334	CG11267
FBgn0011284		FBgn0011284	RpS4
FBgn0003462		FBgn0003462	Sod1
FBgn0019644		FBgn0019644	ATPsynB
FBgn0010408		FBgn0010408	RpS9
FBgn0035985		FBgn0035985	Cpr67B
FBgn0005533		FBgn0005533	RpS17
FBgn0000116		FBgn0000116	Argk
FBgn0017579		FBgn0017579	RpL14
FBgn0035811		FBgn0035811	CG12262
FBgn0010387		FBgn0010387	Dbi
FBgn0001258		FBgn0001258	ImpL3
FBgn0035630		FBgn0035630	CG10576
FBgn0025814		FBgn0025814	Mgstl
FBgn0285948		FBgn0285948
FBgn0003941		FBgn0003941	RpL40
FBgn0250906		FBgn0250906	Pgk
FBgn0031418		FBgn0031418	CG3609
FBgn0000579		FBgn0000579	Eno
FBgn0053128		FBgn0053128	CG33128
FBgn0031260		FBgn0031260	Spp
FBgn0037001		FBgn0037001	ND-39
FBgn0263911		FBgn0263911	COX8
FBgn0000045		FBgn0000045	Act79B
FBgn0053169		FBgn0053169	CG33169
FBgn0037414		FBgn0037414	Osi7
FBgn0003261		FBgn0003261	Rm62
FBgn0037351		FBgn0037351	RpL13A
FBgn0000299		FBgn0000299	Col4a1
FBgn0014857		FBgn0014857	His3.3A
FBgn0016075		FBgn0016075	vkg
FBgn0264922		FBgn0264922	smt3
FBgn0052829		FBgn0052829	CG32829
FBgn0031980		FBgn0031980	RpL36A
FBgn0020618		FBgn0020618	Rack1
FBgn0010265		FBgn0010265	RpS13
FBgn0040064		FBgn0040064	yip2
FBgn0025700		FBgn0025700	CG5885
FBgn0262782		FBgn0262782	Mdh1
FBgn0032400		FBgn0032400	CG6770
FBgn0032715		FBgn0032715	CG17597
FBgn0086710		FBgn0086710	RpL30
FBgn0032833		FBgn0032833	COX4
FBgn0011638		FBgn0011638	La
FBgn0010100		FBgn0010100	Acon
FBgn0003885		FBgn0003885	alphaTub84D
FBgn0037468		FBgn0037468	CG1943
FBgn0003884		FBgn0003884	alphaTub84B
FBgn0010774		FBgn0010774	Ref1
FBgn0265101		FBgn0265101	Sgt1
FBgn0037607		FBgn0037607	CG8036
FBgn0037671		FBgn0037671	VhaM8.9
FBgn0011768		FBgn0011768	Fdh
FBgn0037874		FBgn0037874	Tctp
FBgn0020910		FBgn0020910	RpL3
FBgn0086472		FBgn0086472	RpS25
FBgn0005671		FBgn0005671	Vha55
FBgn0000046		FBgn0000046	Act87E
FBgn0004237		FBgn0004237	Hrb87F
FBgn0263396		FBgn0263396	sqd
FBgn0038224		FBgn0038224	ATPsynE
FBgn0038271		FBgn0038271	UQCR-C1
FBgn0028662		FBgn0028662	VhaPPA1-1
FBgn0266599		FBgn0266599	Hsc70-4
FBgn0038491		FBgn0038491	CG5292
FBgn0024432		FBgn0024432	Dlc90F
FBgn0051229		FBgn0051229	CG31229
FBgn0016120		FBgn0016120	ATPsynD
FBgn0283536		FBgn0283536	Vha13
FBgn0019936		FBgn0019936	RpS20
FBgn0267385		FBgn0267385	PyK
FBgn0002622		FBgn0002622	RpS3
FBgn0046214		FBgn0046214	vig2
FBgn0039359		FBgn0039359	RpL27
FBgn0000064		FBgn0000064	Ald
FBgn0039562		FBgn0039562	Gp93
FBgn0001215		FBgn0001215	Hrb98DE
FBgn0039635		FBgn0039635	CG11876
FBgn0014869		FBgn0014869	Pglym78
FBgn0029176		FBgn0029176	eEF1gamma
FBgn0039678		FBgn0039678	Obp99a
FBgn0039697		FBgn0039697	CG7834
FBgn0020235		FBgn0020235	ATPsyngamma
FBgn0016685		FBgn0016685	Nlp
FBgn0086355		FBgn0086355	Tpi
FBgn0039737		FBgn0039737	CG7920
FBgn0015222		FBgn0015222	Fer1HCH
FBgn0000557		FBgn0000557	eEF1alpha2
FBgn0000559		FBgn0000559	eEF2
FBgn0022893		FBgn0022893	Df31
FBgn0034468		FBgn0034468	Obp56a
FBgn0013954		FBgn0013954	FK506-bp2
FBgn0013325		FBgn0013325	RpL11
FBgn0284243		FBgn0284243	betaTub56D
FBgn0265297		FBgn0265297	pAbp
FBgn0034245		FBgn0034245	UQCR-6.4
FBgn0010409		FBgn0010409	RpL18A
FBgn0000078		FBgn0000078	Amy-d
FBgn0000079		FBgn0000079	Amy-p
FBgn0010226		FBgn0010226	GstS1
FBgn0034138		FBgn0034138	RpS15
FBgn0024754		FBgn0024754	Flo1
FBgn0033961		FBgn0033961	ND-B15
FBgn0001220		FBgn0001220	Hsc70-5
FBgn0013770		FBgn0013770	Cp1
FBgn0033879		FBgn0033879	CG6543
FBgn0033787		FBgn0033787	CG13321
FBgn0023167		FBgn0023167	SmD3
FBgn0000426		FBgn0000426	SmF
FBgn0010516		FBgn0010516	wal
FBgn0021795		FBgn0021795	Tapdelta
FBgn0033555		FBgn0033555	RpS15Ab
FBgn0033448		FBgn0033448	hebe
FBgn0033446		FBgn0033446	CG1648
FBgn0284436		FBgn0284436	CCT8
FBgn0033268		FBgn0033268	Obp44a
FBgn0263121		FBgn0263121	Prosalpha1
FBgn0030151		FBgn0030151	CG1354
FBgn0039757		FBgn0039757	RpS7
FBgn0001098		FBgn0001098	Gdh
FBgn0002773		FBgn0002773	Mlc2
FBgn0004507		FBgn0004507	GlyP
FBgn0004363		FBgn0004363	porin
FBgn0000042		FBgn0000042	Act5C
FBgn0030234		FBgn0030234	CG15211
FBgn0035612		FBgn0035612	frm

## Sheet: Codon Opt 70-80
FBgn0015288		FBgn0015288	RpL22
FBgn0029785		FBgn0029785	RpL35
FBgn0014026		FBgn0014026	RpL7A
FBgn0011211		FBgn0011211	blw
FBgn0261596		FBgn0261596	RpS24
FBgn0003062		FBgn0003062	Fib
FBgn0026372		FBgn0026372	RpL23A
FBgn0261602		FBgn0261602	RpL8
FBgn0035513		FBgn0035513	Cpr64Ad
FBgn0035582		FBgn0035582	CG13705
FBgn0030616		FBgn0030616	RpL37a
FBgn0001092		FBgn0001092	Gapdh2
FBgn0285947		FBgn0285947
FBgn0031049		FBgn0031049	Sec61gamma
FBgn0036825		FBgn0036825	RpL26
FBgn0002593		FBgn0002593	RpLP1
FBgn0037328		FBgn0037328	RpL35A
FBgn0261608		FBgn0261608	RpL37A
FBgn0015031		FBgn0015031	cype
FBgn0011272		FBgn0011272	RpL13
FBgn0004867		FBgn0004867	RpS2
FBgn0005593		FBgn0005593	RpL7
FBgn0015756		FBgn0015756	RpL9
FBgn0032518		FBgn0032518	RpL24
FBgn0284248		FBgn0284248	Cyt-c-p
FBgn0261597		FBgn0261597	RpS26
FBgn0040529		FBgn0040529	COX7A
FBgn0037686		FBgn0037686	RpL34b
FBgn0013981		FBgn0013981	His4r
FBgn0262559		FBgn0262559	Mdh2
FBgn0038834		FBgn0038834	RpS30
FBgn0038973		FBgn0038973	Pebp1
FBgn0029170		FBgn0029170	TwdlT
FBgn0003279		FBgn0003279	RpL4
FBgn0039713		FBgn0039713	RpS8
FBgn0039857		FBgn0039857	RpL6
FBgn0003065		FBgn0003065	CG2150
FBgn0010411		FBgn0010411	RpS18
FBgn0002789		FBgn0002789	Mp20
FBgn0033691		FBgn0033691	CG8860
FBgn0284245		FBgn0284245	eEF1alpha1
FBgn0001091		FBgn0001091	Gapdh1
FBgn0037913		FBgn0037913	fabp

## Sheet: Codon Opt 60-80+Down in 3 KDs
Genes with Codon Optimalities of 60-80% that are down regulated by Pum, Not1, and Pop2 RNAi.
TMA7/CG13364
pAbp
RpL13
RpL14
RpL23
RpL24
RpL26
RpL27
RpL29
RpL3
RpL34b
RpL35
RpL35A
RpL36
RpL36A
RpL37a
RpL6
RpL7
RpL7A
RpL8
RpS13
RpS14a
RpS14b
RpS15
RpS15Aa
RpS15Ab
RpS16
RpS17
RpS24
RpS25
RpS26
RpS30
RpS5a
RpS7
RpS8
RpS9
